# Supplementary material for: Conserved Control Path in Multilayer Networks
Source: Entropy (Basel). 2022 Jul 15;24(7):979. doi: 10.3390/e24070979 (PMC9324794; doi:10.3390/e24070979)
Supplement: Supplementary file 1 [file entropy-24-00979-s001.zip]

Archive with 6 entries (6 files):
- Supplementary Data 1.xlsx
- Supplementary Data 2.xlsx
- Supplementary Data 3.xlsx
- Supplementary Data 4.xlsx
- Supplementary Data 5.xlsx
- Supplementary Material.pdf
