# Supplementary material for: Conserved Control Path in Multilayer Networks
Source: Entropy (Basel). 2022 Jul 15;24(7):979. doi: 10.3390/e24070979 (PMC9324794; doi:10.3390/e24070979)
Supplement: Supplementary file 1 [file entropy-24-00979-s001.zip › Supplementary Data 1.xlsx]

## Sheet: BLCA
node1	node2	edge_type	activity
NUP153	HSPA12B	ordinary	20.3548
NUP98	CDCA8	ordinary	62.9906
SOCS1	LY96	redundant	23.694
PAF1	HIST1H2BC	ordinary	17.3704
CACNA2D1	ATP2A3	ordinary	35.2368
PIK3CA	CD3D	redundant	12.9846
PLAT	PDGFD	critical	32.9444
ATP6V1E1	ADPGK	ordinary	25.6722
CATSPERG	ANXA1	ordinary	22.1957
FGFR1OP2	FYN	ordinary	27.6809
NOL12	HEATR1	ordinary	19.4283
PIK3R6	BIN1	ordinary	116.342
ACVR2B	BMPR1A	ordinary	53.4401
GNG7	PRKCQ	ordinary	68.1479
HIST3H2BB	CHEK2	ordinary	35.2148
UIMC1	HIST1H2AG	ordinary	26.6981
RYR3	SLC8B1	redundant	126.059
CCNB2	SEC13	ordinary	42.739
KDR	RAC1	redundant	14.3745
STAT4	LCP1	ordinary	75.3094
PSMB7	PPP2R5C	redundant	24.5683
FCGR1A	FGFR1OP	ordinary	14.6275
TADA3	HIST2H2BE	ordinary	20.5929
CALM3	TNNT1	ordinary	22.44
CHMP4A	UBA52	ordinary	26.2781
AGO4	CDKN2A	ordinary	22.6649
GNG11	INPP5K	ordinary	35.269
ELL	RPS27A	redundant	18.0824
PIP5K1C	GNAI3	redundant	46.5407
ITPR3	TNNI2	ordinary	23.7057
SEC23A	SEC22B	ordinary	28.7738
COPS4	WDR5	ordinary	30.5259
PSMA4	CDC16	ordinary	12.957
POM121C	SNRPF	ordinary	15.2031
GNAI1	CACNA2D1	ordinary	37.3494
ANK3	KDELR3	ordinary	12.7861
PLCE1	DAGLB	ordinary	21.7982
CALM2	PDE10A	ordinary	19.1879
ARRB1	MAPK3	ordinary	25.7336
DZIP1	GLI3	redundant	36.0196
HCN3	ATP1A4	ordinary	21.4037
SLC25A4	GNAI1	redundant	62.5963
MCOLN1	MYL12B	ordinary	15.1918
VCL	MAPK1	ordinary	89.7582
IVD	MCCC1	ordinary	25.5702
TFAP2A	PITX2	ordinary	35.4277
RFC5	XRCC2	ordinary	108.176
SLC25A13	QARS	redundant	13.4375
KIF2C	HLA-DRB1	ordinary	37.1009
SIRT1	TAF1B	ordinary	41.2415
GNG12	DGKA	ordinary	23.1408
NIP7	UTP15	ordinary	24.172
JUN	KDM6B	ordinary	97.2464
TRIM24	RAC1	ordinary	12.9969
DNA2	RFC1	ordinary	70.285
FBXO11	CUL1	ordinary	35.4964
BRD8	HIST1H4I	ordinary	18.4829
SPRED2	RASAL3	ordinary	20.0037
PIK3R2	TGOLN2	redundant	38.7963
ATM	RBX1	redundant	21.0772
PSMD8	ANAPC16	ordinary	18.0404
HLA-DQB1	ZAP70	ordinary	60.3749
ATP6V0C	ARL2BP	ordinary	16.0133
CACNA2D1	TNNT3	ordinary	33.9181
CAMK2G	CPNE7	ordinary	17.3492
EXO1	POLR2E	ordinary	34.7123
CNIH2	SEC24C	ordinary	13.1262
HIST1H2BC	CHEK2	ordinary	33.7902
SUPT16H	CHEK1	ordinary	84.6871
PTEN	FGF7	redundant	38.7492
TRPC4AP	TNNT2	ordinary	56.1251
EXO1	POLR2L	ordinary	27.1093
RAB3IP	RAB8A	ordinary	19.4755
ARHGAP6	RHOBTB2	ordinary	19.6662
POLR2H	FANCI	ordinary	60.5182
AGPAT4	SLC27A2	ordinary	21.6238
NCOA2	AKAP9	redundant	102.336
P2RX4	CAMK2G	redundant	21.1519
USP21	TAB1	ordinary	19.9345
IRAK1	CYFIP2	redundant	22.97
GPS1	SOCS3	ordinary	73.8404
SLC25A16	BCKDHB	ordinary	14.4233
FKBP1B	TNNT1	ordinary	18.6247
CCNB2	CENPU	ordinary	97.2832
EXO1	FANCE	ordinary	49.9076
BRCA1	SYCP2	ordinary	42.278
EIF5	EIF4G1	redundant	13.1295
AGFG1	ACTR3	ordinary	64.8457
ADCY9	RAPGEF3	ordinary	37.2072
PEMT	PTDSS1	ordinary	19.55
RYR1	CALD1	ordinary	93.8217
CACNA2D3	NFATC1	redundant	20.3815
RORA	NPAS2	ordinary	22.0184
GNPDA1	MPI	critical	15.4048
SPTBN5	COPZ1	ordinary	17.887
CACNA2D1	TNNI1	ordinary	35.7844
ARHGEF19	RHOH	ordinary	23.082
PIK3CA	FGF2	redundant	50.8388
FAM13A	RHOQ	ordinary	19.2086
PSME2	SKP2	ordinary	37.0967
COPS8	SPSB2	ordinary	16.0931
GNG2	ITPKC	ordinary	23.8598
ROCK1	MYH9	ordinary	59.386
MAN2B2	MANBA	critical	17.9576
MCAT	HADHA	redundant	21.4992
ARHGEF4	RHOQ	ordinary	33.6083
PRKAG2	LAMTOR5	ordinary	69.6829
TCIRG1	DTYMK	ordinary	26.3022
TNFSF13B	MAP3K14	ordinary	37.8464
CTTN	VAMP2	ordinary	31.7277
PSMC5	LTBR	ordinary	14.7757
AGPAT3	LPIN1	redundant	14.687
RUNX3	TEAD1	ordinary	79.96
DDX58	CASP8	ordinary	15.7016
PSMD6	CKS1B	ordinary	22.4993
SLC35A3	MGAT4B	ordinary	19.2214
CEP152	AURKA	ordinary	77.3199
IRAK3	TOLLIP	ordinary	14.3686
PRKAA1	RB1CC1	ordinary	23.4362
CDK1	H2AFZ	redundant	117.363
CDK6	TFDP1	ordinary	21.6964
SLC52A2	RFK	critical	30.9967
PIP4K2B	GNA15	redundant	16.5565
B3GLCT	THSD7A	ordinary	25.147
MAPK7	MEF2A	ordinary	39.3158
SYNJ2	M6PR	redundant	16.6493
EYA2	HIST1H2BC	ordinary	16.7006
UBC	PIP5K1A	redundant	26.8835
USP21	TRAF2	redundant	27.2896
ERCC1	ATM	redundant	13.0268
FTSJ3	DDX49	ordinary	28.4882
CLIC2	RASGRF2	ordinary	23.0375
CAMK2G	AKAP1	redundant	27.4114
AK9	ATP6V0E2	ordinary	14.0788
PSMB6	UBB	redundant	22.8784
UBA52	RFC1	ordinary	14.5928
DDX21	H2AFX	redundant	25.9431
MCOLN1	TLN1	ordinary	103.462
NFIA	POLR3K	ordinary	61.5275
LIG1	AQR	ordinary	36.8431
PIK3CD	NCKAP1	redundant	15.0011
RBL2	CDC25C	ordinary	38.3347
GNA14	TRPC6	ordinary	14.796
PSMC2	CDC20	ordinary	52.4958
CDK1	CDC26	ordinary	38.9763
PSMA6	MAD2L1	ordinary	56.2685
PSMA4	OAZ2	ordinary	20.2953
PSMD7	AJUBA	redundant	13.3952
PSMA5	BIRC3	redundant	15.6045
ZMYM2	ABI2	ordinary	38.6395
STAT3	JUNB	redundant	55.0411
GRB2	SYT11	redundant	33.6957
EPC1	HIST4H4	ordinary	45.6004
PSMA2	NPEPPS	ordinary	13.4584
KAT5	RFC4	ordinary	31.2856
CPT1B	AACS	redundant	20.0945
COPS2	COMMD8	ordinary	30.7045
SLC4A7	CAMK2G	redundant	23.9617
SMAD4	SMAD7	redundant	40.8643
SRC	CD247	redundant	19.1254
ITSN2	ADRB2	ordinary	17.0638
PSMA6	OAZ3	ordinary	13.2981
CBL	IGF2R	redundant	44.8634
FGFR1OP	STAT3	ordinary	19.3209
PSMC4	SKP1	redundant	18.1871
PSMB2	PRICKLE1	ordinary	25.7434
HBEGF	BRK1	redundant	73.2179
PPIB	COL11A2	ordinary	24.0507
EP300	HIST1H2AG	redundant	19.2263
ARHGAP33	RHOT2	ordinary	22.4963
SLC25A13	MARS	redundant	38.2039
AKAP1	TNNT2	ordinary	50.9421
TRPC4AP	PYGB	redundant	55.5825
EXOSC9	WDR46	ordinary	25.4265
PSENEN	DTX2	ordinary	19.9818
MTA2	HIST3H2A	ordinary	28.5265
RFC2	RAD51AP1	ordinary	72.415
P3H3	COL5A3	ordinary	22.3258
FAM20C	FSTL3	ordinary	18.6171
MED1	TXNRD1	ordinary	16.7171
DLG1	VDAC1	redundant	12.7577
NIPAL2	MMGT1	ordinary	15.1572
DNA2	FANCI	redundant	158.508
CNGB1	ATP1B2	redundant	69.1213
TAF1B	HIST1H2BJ	ordinary	26.2055
GNB4	ZMYM2	ordinary	32.6337
IL33	WASF3	ordinary	20.2464
RBBP4	BRD1	ordinary	56.3893
TAF1A	HIST1H2BG	ordinary	20.0558
ATP2B4	ATP2C2	ordinary	55.6079
PIP4K2C	PIK3R3	ordinary	16.8747
ORAI1	SORBS1	ordinary	114.774
CCDC8	BIRC5	ordinary	22.1932
RMI1	APEX1	ordinary	32.8709
RAE1	AURKB	ordinary	59.597
COPS8	SKP2	ordinary	29.847
POLR1D	HIST1H2BN	ordinary	15.0314
NUP85	HSPA4L	ordinary	34.4898
HIST4H4	H2AFX	ordinary	29.3331
PSMD12	TNFSF12	ordinary	47.2876
ERBB3	NCKAP1	ordinary	14.6376
NME1	TTC21B	ordinary	31.7933
ANK2	TMED9	ordinary	49.7475
HIST1H2BD	H2AFX	ordinary	45.352
LEF1	HIST1H2BG	ordinary	17.7018
PIK3C2B	ACTR3	redundant	21.062
NUP214	PHAX	ordinary	17.2727
DVL1	EPHB6	ordinary	14.596
NUP188	CPSF4	ordinary	26.9837
RBBP8	HMGN1	ordinary	17.9627
DVL1	PIK3R2	ordinary	15.7574
PSMB10	NFKB1	redundant	18.3037
FBXW4	CUL1	ordinary	13.0425
TAF6L	HIST1H3H	ordinary	31.0992
PPP5C	NRAS	redundant	28.7879
ORAI2	TMOD1	ordinary	82.9647
POLK	RAD50	ordinary	87.8115
SYDE2	RAC3	ordinary	44.7835
VAMP7	SH3D19	ordinary	58.8094
ITSN1	ARPC1B	ordinary	24.825
PTGS2	PTGIS	redundant	72.3521
ANO1	SLC6A6	ordinary	13.5388
CALM1	PYGL	redundant	24.6989
P2RX7	PLN	redundant	74.2063
FKBP1B	VAMP2	redundant	28.5176
PSMB6	CDK2	redundant	17.7364
HAUS5	AURKA	ordinary	58.9294
MMP9	CDH1	redundant	13.6037
FAM13B	RHOBTB2	ordinary	44.2699
MGLL	AQP9	ordinary	40.6389
PIP5K1C	PIK3CD	ordinary	48.4674
CD3D	ARPC5	ordinary	16.769
ATP1A4	KCNIP4	ordinary	48.5244
DEK	HIST1H4I	ordinary	25.244
CACNA2D1	MYL6B	ordinary	42.3816
OSBPL10	SACM1L	redundant	54.5134
CAMK2G	SORBS1	ordinary	132.549
PIK3R1	CD3G	redundant	18.5839
HGS	EGFR	redundant	15.3028
TRPV4	DYSF	ordinary	41.0282
TNRC6C	NOTCH4	ordinary	34.6548
GNB1	ATP1A1	ordinary	12.7949
PTPN6	HLA-DRB1	redundant	14.5286
TAF10	HIST1H2BH	ordinary	21.0807
CEPT1	PLA2G4A	redundant	17.3075
TBL1XR1	FADS1	redundant	14.9345
GNG2	DGKI	ordinary	42.0664
CCNB2	TPR	ordinary	36.1551
ARHGAP10	CDC42	ordinary	41.5366
CALM3	TRPC1	redundant	29.2822
ITPR1	TMOD2	ordinary	122.496
SPTSSA	ACLY	ordinary	14.609
PSMA3	NUMB	ordinary	25.2926
GNG11	NCKAP1	ordinary	48.1518
ARFGAP3	COPE	ordinary	19.5609
NUP85	FIP1L1	ordinary	53.4564
FAM20C	IGFBP7	ordinary	60.3736
PREX1	RAC2	ordinary	35.8228
NUP85	KPNA5	ordinary	48.3001
CACFD1	DES	ordinary	52.4689
SMAD2	SMAD7	ordinary	27.3
ATP6V1H	ABCC4	ordinary	19.1763
TRPC4AP	STXBP1	ordinary	20.0555
PSMD10	CCNE2	redundant	35.8195
CATSPERB	PRKCA	redundant	21.3677
TOP3A	PRPF19	ordinary	24.3277
NUP43	CPSF3	ordinary	30.1495
PIK3R5	TFRC	redundant	13.463
CACNB1	RAB3A	redundant	12.841
CRLS1	BCKDHB	redundant	28.0612
PFAS	TTLL4	ordinary	44.5107
NMT2	ACSL4	ordinary	12.961
COMMD8	CUL5	ordinary	15.6263
ATP1B2	ARL6IP5	redundant	56.6363
BRAF	CLCN6	ordinary	26.6027
CNGB1	TLN1	ordinary	113.58
PIK3R1	VAMP3	redundant	19.428
ATM	MDM4	ordinary	26.9523
SEC11C	SEC61A2	ordinary	26.6249
PPP2CB	RBL1	ordinary	47.17
SHB	BCAR1	ordinary	27.0814
CALM1	HRAS	redundant	26.8967
RFC5	KAT5	ordinary	37.9113
GPS1	LMO7	ordinary	21.6489
ITPR2	MYL9	ordinary	105.036
CAPZA1	FKBP4	ordinary	17.7252
UBC	XRCC2	redundant	63.1867
CAMK2D	VCL	ordinary	91.3849
PIP5K1B	UBC	redundant	32.2654
CATSPER1	TMOD3	ordinary	15.5879
TPR	HSPA12B	ordinary	22.8304
SLC26A6	CLCA2	ordinary	31.7574
NCOR2	HIST1H2BH	ordinary	23.1659
SLC25A6	GNAL	redundant	77.9121
ERCC6	H2AFX	ordinary	27.5704
CALM3	ANXA1	ordinary	19.3745
CERS2	SLC27A5	ordinary	14.2289
PIP4K2A	CUX1	redundant	64.7025
RPS27A	ISG15	redundant	22.3869
RUNX1	CAMK2D	redundant	16.4381
SLC25A4	ADCY7	ordinary	75.8292
GPS1	RBBP5	ordinary	17.4377
AAAS	WDR33	ordinary	22.253
CD79A	RASGRP3	redundant	169.587
ORAI1	TPM1	ordinary	135.765
SOCS2	JAK1	ordinary	22.2784
CTPS1	SLC25A12	ordinary	30.6605
GNAI1	GRIN2D	redundant	24.0332
SH3KBP1	ARPC5	redundant	17.9325
PKM	LDHB	ordinary	14.4779
RBBP7	HIST3H2BB	ordinary	18.3052
REEP5	GNB1	ordinary	12.7623
SEC23A	TMED2	ordinary	48.3052
CAMK2D	JAK1	redundant	37.9241
PIK3CG	BTK	redundant	120.751
FAM20A	LAMC1	ordinary	26.1036
AK3	NME4	ordinary	16.1067
TRPA1	AKAP9	redundant	19.0445
LPCAT1	MORC2	redundant	16.7135
OCRL	SYT1	redundant	22.7713
PSMB2	TNFRSF1B	ordinary	23.9391
RAD50	FEN1	ordinary	21.8424
EPHA7	EFNA3	ordinary	54.4129
P2RX1	TNNT3	ordinary	87.0562
DCTN3	AURKA	ordinary	51.7663
CD79B	TRPC6	redundant	14.0829
NUP205	FIP1L1	ordinary	37.4047
GMPS	GLUL	redundant	21.5591
MPHOSPH6	UTP4	ordinary	15.1594
VAV2	PRKCA	ordinary	22.5267
SMS	MTAP	redundant	43.7988
TRPV6	RASGRP2	redundant	39.7871
HIST3H2BB	NCAPH2	ordinary	20.8977
VEGFA	AXL	redundant	17.3107
FCGR2A	VAV2	ordinary	21.804
DENND1C	RAB8A	ordinary	33.3591
P3H3	COL13A1	ordinary	19.8655
NCOA1	ATP1B2	redundant	66.3085
NUP62	HSPA4	ordinary	14.8068
SLC8A1	CALM1	redundant	83.0654
BRIP1	FANCE	ordinary	45.554
PIP4K2A	PACSIN1	ordinary	16.4787
PSMD1	PPP2R5E	redundant	22.2275
TRPV4	ITGA1	ordinary	57.3652
GRAP2	PRKCQ	ordinary	28.9459
POLR1A	HIST4H4	ordinary	17.1446
EPN1	ARRB1	ordinary	14.7113
VAV2	RAC2	ordinary	14.2903
EXOSC10	RPS2	ordinary	20.6438
PPP1R12A	MYH9	ordinary	132.684
STIM1	ATP2C2	ordinary	19.2893
ATF4	HSPA5	ordinary	16.7039
TRPV4	STXBP1	ordinary	13.7861
NUP43	DIAPH2	redundant	18.9497
SNX9	LDLRAP1	ordinary	49.9459
PDGFA	PDGFRB	ordinary	28.3447
CCNA2	ORC2	ordinary	28.1555
VEGFA	FYN	redundant	34.1865
TRPC6	VDAC1	redundant	19.5386
PDGFRA	PLCG1	ordinary	29.4645
H2AFX	HIST1H3H	ordinary	45.992
COPS6	SOCS3	ordinary	54.694
DCTN1	HSP90AB1	ordinary	23.4397
KITLG	SYK	redundant	60.3068
NRG1	FCGR3A	redundant	13.5148
PIK3CG	ITK	redundant	185.073
AK9	ADCY4	ordinary	17.5609
TFDP2	CDC6	redundant	37.1031
CBL	EPS15	redundant	38.1862
ATP1A1	ABCC9	ordinary	44.5844
PIK3R2	LCP2	redundant	13.9184
ARFGAP3	CD55	ordinary	39.1633
GATAD2A	HIST3H2BB	ordinary	27.59
TREM2	TXK	ordinary	13.1901
HIST1H2BD	NCAPD3	ordinary	33.4136
RYR3	MYH3	ordinary	181.083
ASNA1	SEC61A1	ordinary	29.9349
CACNB1	DMD	ordinary	111.994
ATP1A1	GNG5	ordinary	16.8418
EXOSC5	WDR46	ordinary	28.0585
EME1	EXO1	ordinary	107.353
ASXL1	HIST3H2A	ordinary	24.8832
DNA2	UBA52	redundant	32.1144
ELL	XAB2	ordinary	22.1911
ITPR2	PLA2G4A	redundant	18.2634
RBBP4	MEAF6	ordinary	52.9543
FGF2	TEC	ordinary	50.0333
RAC2	RHOB	ordinary	71.0477
NUP107	GEMIN4	ordinary	13.459
PSME1	CKS1B	ordinary	22.6182
INPPL1	SLC2A8	redundant	12.7993
SLC22A5	SLC4A4	ordinary	18.7308
COPS2	KEAP1	redundant	14.9136
AKT3	MDM2	redundant	33.4389
UBA6	UBC	ordinary	37.0711
CACNB2	ACTA2	ordinary	262.009
ABL1	WASF3	redundant	107.06
GAB2	PLCG1	ordinary	21.8029
ITPR1	ITGB5	ordinary	92.0099
SRI	TLN1	ordinary	105.206
PHF21A	HIST4H4	ordinary	27.7764
ARHGAP11B	RHOV	ordinary	25.364
GRB2	WASF3	redundant	13.936
GBF1	COPB2	ordinary	38.625
GPSM3	BDKRB2	ordinary	48.127
ESPL1	NUP43	ordinary	27.0342
HDAC1	HIST2H2AC	ordinary	14.3663
ACAT2	HMGCS1	critical	29.5618
PRKACB	GLI2	redundant	31.1447
ANAPC2	IL6	ordinary	43.8774
BARD1	MAD2L2	ordinary	13.9198
GGT1	SLC1A6	ordinary	12.8102
CLOCK	PER2	redundant	119.221
CD3G	FGFR1OP2	ordinary	13.6374
ARHGEF3	RHOQ	ordinary	30.6826
CSK	CD4	redundant	24.903
USP2	RNF31	ordinary	25.595
ATP2B4	DYSF	ordinary	102.296
CATSPER2	GNAI2	redundant	17.9444
NUP155	HNRNPC	ordinary	45.6364
CACNA2D1	RASGRF2	ordinary	45.1107
GNAI2	CACNB3	redundant	22.8788
PIK3CA	SNX9	ordinary	56.5449
CDK1	MAD2L1	ordinary	126.037
CA2	PAICS	redundant	26.5302
GAB2	CD28	ordinary	22.6759
CD79B	CALM3	redundant	15.5424
NUP85	AURKB	ordinary	118.387
MAT2A	PRMT3	ordinary	108.619
TOP3A	LIG3	ordinary	16.5611
CHML	RAB3A	redundant	16.164
POLR2H	ERCC6	ordinary	30.155
CARM1	HMGCR	redundant	17.3919
AGPAT3	PLA2G4A	redundant	20.0433
GPS2	HIST1H2BD	ordinary	25.5413
NEURL1	UBB	redundant	18.0939
STAT3	MMP3	ordinary	13.4891
PPARA	ACSL1	redundant	15.6947
SLC3A2	CAMK2G	redundant	31.6035
PPP2CB	ARAF	ordinary	27.6384
BARD1	CHEK1	redundant	83.8101
TSC2	MLST8	ordinary	38.3029
TRPM7	UNC13B	ordinary	21.4376
IRAK1	FYN	redundant	34.6733
FANCA	FANCM	ordinary	70.2125
PPA1	PYGB	ordinary	54.7224
CLTA	ARPC1B	redundant	37.5712
SYK	ITK	redundant	17.1965
POLD4	RPA3	ordinary	18.7043
RANBP2	DDX20	ordinary	40.7988
COPS3	CUL4A	redundant	12.8143
COPS7B	FBXL7	redundant	68.0663
ARID4A	HIST1H2BD	ordinary	38.9701
SLC37A1	G6PC3	ordinary	23.9025
RNF40	UBE2A	ordinary	13.1339
PDE1C	AK2	ordinary	113.373
XRN1	LSM5	ordinary	14.692
AP2S1	VAMP2	redundant	36.9678
ATP1A1	SLC22A15	ordinary	13.0691
PSMB9	CUL3	ordinary	20.5184
GNG2	ITPR1	ordinary	102.818
NCL	NOC4L	ordinary	16.5757
TACO1	CYCS	ordinary	20.0746
UIMC1	BARD1	ordinary	19.2966
PIP4K2C	RAP1A	redundant	109.114
RYR3	SLC24A1	ordinary	121.992
INHBB	ACVR1C	ordinary	12.9765
EXOSC4	UTP14C	ordinary	31.3065
JAK2	STAT5A	redundant	41.4864
STON1	PIP5K1C	ordinary	109.987
CCND2	E2F5	redundant	28.3114
ARHGAP35	RASA1	ordinary	18.2191
ATG7	MAP2K2	ordinary	15.3741
CHD9	TRIB3	ordinary	23.7763
CAMK2G	NEB	ordinary	21.2744
COPS4	FBXO2	ordinary	21.5666
STON2	PTPN13	ordinary	17.293
PDPN	DGKG	ordinary	39.999
CEP250	AURKA	ordinary	47.0769
DVL3	EZR	ordinary	21.9231
RYR3	MYL12A	redundant	122.266
ARL2BP	ATP6V1A	ordinary	55.9629
CALM1	ATP1A1	redundant	29.0809
CLIC2	ACTA2	ordinary	90.3006
B4GALT7	SDC3	ordinary	31.6544
BLM	EP300	redundant	41.9317
SPCS2	RPL12	ordinary	13.3871
SPTBN1	YKT6	ordinary	19.5576
PSMB5	HECW1	ordinary	14.4183
SLC4A3	ANO7	ordinary	22.9335
HSP90AA1	AURKA	redundant	53.382
PLD1	PITPNM2	redundant	25.4947
TRPC4AP	CACNB3	redundant	24.2112
SYDE2	RHOH	ordinary	30.9927
NUP214	SNRPF	ordinary	19.144
PIP5K1A	GNG12	ordinary	20.9158
PDZD11	FXYD6	redundant	76.2821
TRPC4AP	GNAI2	redundant	12.6587
TRPA1	TCAP	ordinary	24.4517
RMI2	POLR2J	ordinary	25.7879
PLBD1	PLA2G4A	redundant	17.2835
NUP43	KPNA2	ordinary	37.4053
GSK3B	POLR2H	ordinary	33.1806
PIP5K1C	SH3KBP1	redundant	45.1972
CCZ1B	GDI2	ordinary	25.037
TRPV3	SLC24A3	ordinary	36.2748
NME4	NADK2	ordinary	23.6691
PDGFA	FGF2	redundant	46.8938
FXYD6	CAMK2D	redundant	82.4225
IRAK4	WASF2	redundant	14.3612
SH3KBP1	CALM1	redundant	25.7765
ALOX5AP	ALOX15	ordinary	12.8233
ORMDL3	ACLY	ordinary	19.3925
PSMD14	NUMB	ordinary	24.2857
TFPT	COPS7B	ordinary	16.0065
P2RX1	GRIN2D	redundant	107.435
POLE2	BRIP1	ordinary	110.41
CALM2	PDE4D	ordinary	85.7096
RAMP3	GNAS	ordinary	17.8366
RUVBL1	HIST1H2BN	redundant	31.9533
PLD4	OCRL	redundant	24.339
PSMD1	UBC	redundant	31.5415
NAGS	PDHA1	redundant	21.4642
TGS1	HMGCS1	redundant	13.1061
CTSA	GLB1	ordinary	47.6355
CACNB3	SORBS3	ordinary	29.1009
HLA-DPA1	ZAP70	ordinary	60.2891
ASIC1	ATP1A1	ordinary	14.1626
PLA2G6	CAPZA1	ordinary	16.0951
ITPR1	CNGB1	ordinary	106.427
GNB5	WASF2	redundant	37.5616
PSMA4	PPP2R5E	redundant	18.4034
DLG4	CACNA2D2	redundant	31.0218
ARHGEF16	RHOB	ordinary	76.7065
SYNJ2	EPS15	redundant	17.0348
CACNB3	MYL6B	ordinary	18.6359
PIAS1	SP3	ordinary	38.9302
PLA2G4A	AGPAT3	ordinary	20.0433
ARHGEF15	RHOG	ordinary	19.2112
CACNB1	PYGL	redundant	15.5876
CACNB3	SLC24A3	ordinary	54.7393
GNG5	CACNA2D2	ordinary	19.5543
ARHGEF6	RHOH	ordinary	20.488
SRC	FGF1	redundant	15.0792
PSMD8	BUB1B	ordinary	36.925
NUP93	NXF1	ordinary	13.484
CUX1	LCP2	ordinary	18.4399
HMGCR	MORC2	ordinary	22.8403
NUP153	GEMIN6	ordinary	16.8051
TPCN1	STXBP1	ordinary	19.0069
RAI1	CLOCK	ordinary	39.0129
ATP1A1	SLC5A6	redundant	25.7185
ERCC2	POLR2L	ordinary	29.2098
GLCE	GPC6	ordinary	14.7716
ATP6V1D	DTYMK	ordinary	21.4355
GNPAT	ACLY	ordinary	27.7851
GNB2	NCKAP1L	ordinary	18.6662
ADRB2	MYO10	ordinary	27.0594
CAD	VAMP2	redundant	43.5115
GABBR2	ATP1B2	ordinary	58.7412
PSMB4	RELA	redundant	18.8535
PIK3R5	FGF1	redundant	14.4146
CAMK2D	ATP1A1	redundant	25.478
DNAJB6	HSPA12B	ordinary	21.5749
CPLX1	RAB3A	ordinary	24.7844
DIAPH2	DSN1	ordinary	32.1651
STON1	SYT1	ordinary	64.5487
PSMD10	NUMB	ordinary	21.4384
GCLM	GGCT	ordinary	18.7797
PSMC5	SPOP	ordinary	52.7222
ATM	GTF2H3	ordinary	20.8295
RFC4	PALB2	ordinary	39.6029
CREBBP	GRHL1	ordinary	20.0163
ADCY9	PRKAR2B	ordinary	57.2419
ARFGAP1	KDELR2	ordinary	34.2354
HIST2H2BE	NCAPG2	ordinary	29.6147
TRPA1	SLC24A1	ordinary	20.753
GNG12	AKT2	ordinary	19.4543
PIK3CA	TRIP10	ordinary	16.0433
NCL	NOL6	ordinary	22.3961
SLC24A3	MCOLN2	ordinary	34.1702
ARHGEF17	RHOA	ordinary	40.1103
NUP107	HSPA5	ordinary	18.1684
CALM3	ATP2C2	ordinary	15.7322
PSMB6	CCNE2	redundant	20.4332
P2RX4	CLCA2	ordinary	24.6625
NIP7	NOL6	ordinary	18.5508
PPAT	SLC3A2	redundant	26.3476
SUCLG1	DLD	redundant	25.2437
RHNO1	RPA2	ordinary	29.504
MND1	RPA1	ordinary	32.4884
CTSA	HLA-DPB1	ordinary	18.24
DPAGT1	ALG14	critical	16.936
SCN5A	CAMK2D	ordinary	16.2681
ARHGAP11B	CDC42	ordinary	23.2669
AGO2	NOTCH2	ordinary	18.8849
CACNA2D3	TPM3	ordinary	15.5928
POLD4	TOP3A	ordinary	14.7597
SRSF10	HNRNPA0	ordinary	47.915
CACNB3	TMOD1	ordinary	94.7035
GGT6	SLC1A6	redundant	13.4056
CACNB3	ATP2A3	ordinary	17.0278
PI4K2B	VAMP3	redundant	14.2733
AKAP1	DMD	ordinary	110.664
SBF2	PPP2R5A	redundant	64.1553
GGT7	CALM1	ordinary	23.7891
CACNG4	RASGRF1	ordinary	19.2561
FGFR1OP2	FCGR3A	ordinary	14.8324
TREM2	CUX1	ordinary	23.9269
NRAS	VCL	ordinary	89.1929
ALG10	STT3A	ordinary	37.4542
TBL1XR1	GLIPR1	ordinary	18.5224
CALM2	CLCA4	ordinary	25.1475
RACGAP1	RHOA	ordinary	25.1903
GNA11	DAGLB	ordinary	36.1796
SLC24A3	ATP2B4	ordinary	104.818
KAT2A	TBP	ordinary	21.8024
TRPV6	SORBS3	ordinary	12.9796
TRPV3	PRKCA	redundant	16.4411
FGF2	CD247	ordinary	54.7835
IRS2	GRAP2	ordinary	13.9467
CDK4	E2F2	redundant	21.548
CD3G	BTK	ordinary	81.7916
ERBB2	TRIM24	ordinary	30.1899
SUZ12	H2AFV	ordinary	16.7988
MSL1	HIST1H4I	ordinary	23.1492
ST6GALNAC3	MUC4	ordinary	16.575
CACNB3	VDAC1	redundant	25.7284
LYN	LCP2	redundant	59.4374
CHN2	RHOQ	ordinary	39.7388
APP	PPP3CA	ordinary	29.2641
NCOA2	HMGCR	redundant	29.2847
ESPL1	CENPP	ordinary	20.2974
RNF4	UIMC1	critical	15.8357
GNAI1	NCALD	redundant	55.6599
CYLD	TAB2	ordinary	56.4122
CRTAP	COL13A1	ordinary	69.3343
ATP1A1	HCN3	ordinary	22.3024
ATP6V0E2	ABCC4	ordinary	19.5236
HIST1H2BD	HIST4H4	ordinary	44.4344
PIK3CD	CYFIP2	redundant	27.6306
PSME3	AJUBA	redundant	19.7307
DAB2	ARPC3	ordinary	14.7076
EZH2	H3F3B	ordinary	30.2206
DDAH1	ASS1	critical	26.05
CAMK2G	MDM2	redundant	18.153
BTC	FYN	redundant	29.7635
FAM20C	IL6	redundant	73.0456
PIP5K1C	PDGFRB	redundant	57.9329
RAP1GAP	RAP1A	ordinary	108.15
GNA14	DGKI	ordinary	14.1985
HSPA8	SNX9	ordinary	51.9158
STIM1	ANXA1	ordinary	46.1402
ADAM9	COL17A1	critical	13.4847
AGPAT1	LPIN3	ordinary	16.8067
PRKAB2	RRAGD	ordinary	31.0987
NDC1	SNUPN	ordinary	20.8943
HIST1H2BK	KDM4A	ordinary	20.7707
UBE2D1	SMAD3	ordinary	18.9066
PSMC4	RELA	redundant	12.9534
PPP1R1B	PDE4B	ordinary	32.3247
RBBP7	HIST1H2BH	ordinary	17.5348
SEH1L	SNRPD3	ordinary	13.2988
PIK3CA	FCHO1	ordinary	22.237
AAAS	RAN	redundant	27.2639
POLR2J	NELFE	ordinary	37.079
DVL1	PPP2R5E	redundant	16.5969
FGFR4	CYFIP2	ordinary	12.9177
AKAP1	NFATC1	redundant	34.8525
PIP5K1C	FYN	redundant	74.9999
PTPN11	BAG4	redundant	19.585
P2RX5	CACNB2	redundant	78.0952
TFDP1	SUZ12	ordinary	33.8253
AP2A1	ROR2	ordinary	22.536
AGBL3	VAMP2	redundant	33.361
TGOLN2	PIP5K1B	ordinary	16.5616
EXOSC8	DDX49	ordinary	29.4204
NME1	ATP6V1A	ordinary	36.0583
EXO1	POLK	ordinary	49.8704
TRIO	RHOQ	ordinary	17.8182
EPS15L1	ARPC5	ordinary	13.1332
PIP5K1C	CBLB	ordinary	49.5676
KAT5	CHEK1	redundant	45.1825
DNA2	FEN1	ordinary	85.634
PEBP1	TRIM24	redundant	32.3481
ESPL1	WAPL	ordinary	25.2421
CHCHD4	CMC2	ordinary	18.309
SUV39H1	HIST1H2BN	ordinary	26.824
POLR2D	MDC1	ordinary	45.6188
PIK3C2B	EPS15	redundant	17.0774
PSMC1	BUB3	ordinary	38.7806
TRPC4AP	MYH11	ordinary	124.399
CACNA1C	CPLX1	ordinary	71.4851
ACTR2	IGF2R	ordinary	36.4388
PSMC3IP	HIST1H4I	ordinary	31.6366
ACOT2	ACAT1	ordinary	38.227
PSMA3	PPP2R5E	redundant	39.2018
CACNA1D	ACTA2	ordinary	72.8588
ARPC1A	TFRC	ordinary	19.0047
SLC38A2	ASNS	ordinary	14.531
EXOSC2	UTP3	ordinary	30.0455
PSMA7	WTIP	ordinary	13.9325
WRN	PARP1	redundant	20.0607
PPP1CB	PER1	redundant	90.9536
NUP107	PHAX	ordinary	14.1288
CCNB2	PPP2R5B	redundant	30.1797
PSMB6	RPS27A	redundant	28.4284
C1QC	C2	ordinary	117.087
CATSPERG	MYL5	ordinary	14.0117
NDC1	HDAC4	ordinary	108.034
SUV39H1	HIST1H2BJ	ordinary	38.2881
IRS1	FGF2	ordinary	49.7702
2020-09-02	HAUS7	ordinary	32.3994
PSMA6	NPEPPS	ordinary	19.8717
LGMN	HLA-DRB1	ordinary	14.106
FXYD6	SRI	ordinary	66.8723
GABPA	POLG2	ordinary	25.2158
HIST2H2AC	NCAPG2	ordinary	24.8675
CATSPERB	VCL	ordinary	82.5617
CD79B	DAPP1	redundant	17.0636
GSS	GSTM3	ordinary	14.9538
KIF15	HLA-DPB1	ordinary	25.6867
PSMD3	RELA	redundant	27.0516
LIAS	MARS2	critical	13.8406
SKP1	AURKA	redundant	45.8456
CACNA1A	CLCA4	ordinary	17.0466
ARHGEF39	RHOA	ordinary	27.5058
FGF2	LCK	ordinary	54.7667
FGFR1	INPP5K	ordinary	26.6015
CAMK2D	NFATC3	redundant	29.8111
ZMYM2	BAIAP2	ordinary	20.526
SRI	LMOD1	ordinary	100.141
BLM	FAAP24	ordinary	98.0439
PIK3R5	SH3KBP1	redundant	26.6963
RAB3GAP1	BICD2	ordinary	26.0636
CRTAP	COL1A2	ordinary	77.5464
PPAT	GCLM	ordinary	19.3469
ARFGAP1	RAB1A	redundant	13.6448
SRM	SAT1	redundant	13.9739
PYGO1	H2AFZ	ordinary	21.7686
CCNB2	CENPL	ordinary	88.4079
LAMA2	HGF	ordinary	69.4993
PSMB3	CDC27	ordinary	15.1483
XRCC1	UBC	redundant	35.5099
PIP4K2C	PDGFRB	redundant	13.7997
ATP2B1	TLN1	ordinary	99.4015
GGT6	NCALD	redundant	52.9936
ACLY	FASN	redundant	69.2106
CUX1	RHOA	ordinary	17.9639
TNFAIP3	RNF31	ordinary	17.6069
ASPH	ANXA6	ordinary	44.7441
KITLG	FGF7	redundant	37.4314
NBN	FANCD2	redundant	49.6859
TRAF6	NCKAP1	redundant	26.7688
ARHGEF10L	RHOB	ordinary	71.2699
SPCS1	SEC61B	ordinary	13.4651
PSME4	TRAF2	redundant	17.7509
EED	H3F3A	ordinary	16.9611
USP1	FANCM	redundant	59.4572
BRCA1	UBE2I	redundant	20.3572
GSK3B	TAF1A	redundant	27.0657
SLC9A4	GRIN2D	ordinary	21.2465
LCK	PDCD1	redundant	229.874
SLC1A6	SLC9A7	redundant	19.1827
CACNG4	NFATC3	redundant	16.7732
FAM13B	RHOB	ordinary	114.891
STXBP1	SLC6A11	redundant	14.2922
CACNG4	TMOD2	ordinary	18.368
CAPN1	CDH1	critical	29.8656
TRPC1	PXN	ordinary	22.5691
PIP5K1A	WASF3	redundant	21.1694
CASP6	VIM	ordinary	36.9818
PGM2	SLC37A4	ordinary	25.0901
DVL3	LCP2	redundant	20.2085
BOP1	UTP3	ordinary	26.793
NBN	RPA3	redundant	17.7824
HADHB	CS	redundant	15.1126
BTC	SOS1	redundant	20.1845
PLCB2	DGKD	ordinary	16.5627
PSMA5	FBXL7	redundant	80.8917
POLR2K	HIST1H4I	ordinary	24.6902
MCRS1	COPS2	ordinary	15.9131
ITPR1	RASGRF2	ordinary	99.4428
CALM2	NFATC3	redundant	19.2233
PSME3	LTB	ordinary	21.2906
PSMA3	OAZ1	ordinary	22.4565
FAM20C	SDC2	redundant	45.0803
MOV10	NOTCH4	ordinary	20.6577
PAFAH1B1	DYNC1H1	ordinary	51.097
RPS11	RRP7A	ordinary	18.4106
SNX18	EGFR	ordinary	13.6622
ALG3	ALG9	redundant	66.8309
ELOVL7	HSD17B12	critical	15.842
MMP15	NID1	ordinary	21.2345
ECT2	RHOV	ordinary	23.2187
FGFR3	FCGR2A	ordinary	18.8986
RPS13	TBL3	ordinary	25.3109
PRKAA2	ULK1	redundant	43.5647
CAMK2G	GNAI1	redundant	24.9892
RAD51C	RAD51	ordinary	54.1335
AGPAT5	LPIN1	redundant	15.5254
ARRB1	VAMP2	ordinary	33.3957
DNAJB1	HSPA2	ordinary	46.4782
TPCN2	ACTG2	ordinary	77.2328
CALM2	P2RX4	ordinary	19.1422
TOMM5	PINK1	redundant	17.2349
RUNX3	TEAD4	ordinary	26.6555
SPTSSB	ACLY	ordinary	14.3079
PTK6	KHDRBS3	ordinary	13.0842
PSMD13	SPOPL	ordinary	29.4639
ACOT1	AACS	ordinary	18.5477
PLCD4	DGAT2	ordinary	167.146
GNAI1	STIM1	ordinary	21.9377
CATSPER2	SLC8B1	redundant	17.585
ARRB2	CD3G	ordinary	28.0305
TRPV6	PRKCZ	redundant	17.7453
PPP1CB	CRY1	ordinary	75.4966
GNG2	FGFR3	ordinary	19.9962
BRCA1	POLH	ordinary	44.3344
GAB2	LCK	ordinary	13.7266
RPS27A	INPP4B	redundant	19.2908
DMAP1	HIST3H2A	ordinary	26.0291
ITPR2	PRKCZ	redundant	20.222
PSMC4	CUL1	redundant	13.4684
NEDD8	UBE2M	ordinary	27.2922
MAP2K2	KDM7A	ordinary	12.7969
DCTN1	NR3C1	ordinary	35.3358
COASY	ACSL4	ordinary	24.533
RYR3	PPFIA3	ordinary	124.682
CALM1	INPP5D	redundant	20.2551
VPS4A	PPIA	redundant	15.6293
HGF	TEC	redundant	13.5472
PRMT5	H2AFX	redundant	26.9461
NUP85	GEMIN2	ordinary	68.0622
PSMD3	RBX1	redundant	29.1831
HDAC2	HIST1H2BJ	ordinary	24.3476
ARHGEF35	RHOJ	ordinary	43.4844
PSMD7	CDC20	ordinary	41.5677
RYR3	RASGRF1	ordinary	124.752
CACNA2D1	ATP2C1	ordinary	47.8742
CAMK2D	IFNGR2	redundant	19.5022
EXOSC8	EMG1	ordinary	16.3662
CCNB1	AHCTF1	ordinary	44.2658
CCNB1	HIST2H2AC	redundant	35.6579
PRKAG2	LAMTOR1	ordinary	65.4988
RHOB	MYH11	ordinary	221.724
FOLH1	TTLL7	ordinary	44.1574
FGFR3	ITK	ordinary	13.183
CYBRD1	CP	ordinary	42.4081
CTSC	HLA-DRA	ordinary	18.5543
PIK3CA	ACTR3	redundant	27.0423
TRPC6	ATP2A2	ordinary	18.5376
CD79A	ITPR3	redundant	18.2281
ITPR2	MYH11	ordinary	115.289
CAMK2D	ACTG2	ordinary	92.0922
FGF2	INPPL1	ordinary	46.0884
PIP4K2C	PIK3C3	ordinary	18.498
XRCC1	RFC5	ordinary	42.903
CPSF6	GRAP2	ordinary	17.2033
GNAI2	STIM1	ordinary	20.102
LDLR	CD3G	ordinary	27.0176
GLA	GLB1	ordinary	21.749
ATP6V0A1	SLC25A10	ordinary	15.0597
ITPR3	CPLX1	ordinary	19.5517
GNG11	SYNJ1	ordinary	37.2285
GCAT	GARS	ordinary	16.4689
CACNB2	STX1A	ordinary	87.7849
AKT1	RPTOR	ordinary	25.0792
HSP90AA1	BAG4	redundant	13.5649
ENPP1	ACP5	critical	490.367
HSP90AA1	TDRKH	ordinary	14.6869
CATSPERB	TMOD1	ordinary	82.3952
SKIV2L2	DIEXF	ordinary	31.3034
POLR1C	HIST2H2AC	ordinary	26.1418
TTF1	HIST1H2AE	ordinary	20.9602
COPS4	DCAF16	ordinary	17.2589
UBB	BRCA1	redundant	20.962
DVL1	FGF2	redundant	51.3371
PDGFRA	FGFR1	ordinary	60.0152
NUP88	GEMIN7	ordinary	16.8787
CACNB2	CLCA4	ordinary	88.6882
P4HA2	COL5A1	ordinary	21.4089
TREM2	PDPK1	ordinary	27.1514
DVL3	LAT2	redundant	15.7341
ARFGAP3	TMED10	ordinary	18.8319
TRPV4	NFATC1	redundant	21.9984
LEF1	HIST1H3H	ordinary	16.1333
P2RX1	SLC8B1	redundant	93.6774
NDC80	STAG2	ordinary	32.4895
CDK11A	PAFAH1B1	ordinary	34.9247
SLC1A1	LRRC49	ordinary	16.2372
IGF2R	MYO10	ordinary	47.3788
PPFIA3	VAMP2	redundant	36.7536
CACNA2D4	RASGRP2	redundant	39.0088
AKT2	PDE3B	ordinary	15.1397
MAPK1	SPRY2	redundant	20.4646
POLH	XRCC2	ordinary	45.449
VAMP8	ARPC5	redundant	18.5848
CNOT6	PAIP1	ordinary	24.494
PTEN	HGS	ordinary	23.5311
ORAI2	CACNB3	redundant	18.3017
PSMD6	ANAPC11	ordinary	14.0369
POLR2L	H2AFJ	ordinary	26.0748
DVL2	IGF2R	redundant	15.5973
PSMC1	PPP2CA	redundant	30.4856
GTF2H1	NCBP1	ordinary	43.8709
COPS7B	FBXL3	ordinary	20.926
CACNG4	CACNB2	redundant	84.5704
GNA11	INPP5B	ordinary	30.7058
SLC25A13	RARS	redundant	18.6892
CPT1B	MORC2	redundant	14.51
RAD50	XAB2	ordinary	13.5745
SUMF2	ARSB	critical	17.0576
GNB5	ERLIN2	redundant	19.6738
PSMD6	GTSE1	ordinary	46.3696
BTC	TXK	redundant	24.7329
CD79B	PIK3R1	redundant	22.8211
PPP1CA	TGFBR1	redundant	16.3303
RTF1	UBE2B	ordinary	15.1688
EXOSC1	FBL	ordinary	13.5672
LCLAT1	ACLY	ordinary	49.9709
BLM	POLR2E	ordinary	33.2572
KIF18A	HLA-DQA2	ordinary	24.8333
DYNC1LI1	DIAPH2	ordinary	15.0182
TCF7L1	HIST1H2BK	ordinary	21.1882
PKM	ATP6V0B	ordinary	19.1913
PIK3CB	PDPK1	redundant	18.3589
CATSPER2	TNNT2	ordinary	48.9357
GNG4	AKT3	ordinary	71.2764
SRSF10	DHX9	ordinary	104.11
EGFR	WASF2	redundant	19.3405
ARHGAP31	RHOC	ordinary	17.5231
CNKSR1	MAP2K2	ordinary	14.5285
STON1	ACTR3	ordinary	65.0642
GNB4	RASGRP2	ordinary	40.0633
SEC23A	LMAN2	ordinary	41.681
PLEKHG5	RHOH	ordinary	12.9713
BARD1	HMGN1	ordinary	32.4658
UBC	XRCC3	redundant	49.6334
CACFD1	VIM	ordinary	13.987
CCNK	CHEK1	ordinary	43.6244
PLCB4	DGKG	ordinary	96.0423
MAPK3	ABI2	redundant	22.4464
ABCC9	ATP1B1	ordinary	47.4958
NUP214	CPSF2	ordinary	17.0268
TCIRG1	SLC25A10	ordinary	18.2432
PIK3C3	MAP1LC3B	ordinary	15.7318
DCTD	RHCG	ordinary	42.2226
ACOT2	HADHB	ordinary	17.238
PGK1	GAPDH	ordinary	67.2855
ARHGEF39	RAC2	ordinary	22.9589
PSMB5	BUB3	ordinary	30.8324
BTK	ITPR1	redundant	104.12
P4HA2	COL4A6	ordinary	24.2521
PSMC3	NFKB2	redundant	14.1075
RPS15A	FBL	ordinary	37.941
PKN1	PPP1R14A	critical	81.6677
ERAP2	HLA-B	ordinary	20.2829
LCK	CTLA4	ordinary	111.367
TOP3A	NBN	redundant	13.2919
ACTR3	VAMP3	ordinary	19.4286
KIF18A	ACTR1A	ordinary	33.4083
DEPDC1B	RHOU	ordinary	28.164
COPS4	STON2	ordinary	18.7811
PSMA4	SPOPL	ordinary	16.925
PTEN	VAV3	redundant	26.1048
CAMK2G	ITGA1	ordinary	69.1571
SOS1	PAK2	ordinary	22.8692
SOCS5	NEDD8	ordinary	29.4066
FYN	JAK2	redundant	40.6939
ATP2B4	NEB	ordinary	58.7678
RPS3A	TBL3	ordinary	26.361
ACTR3	SYT8	ordinary	14.1521
PRMT6	H3F3A	ordinary	34.144
ATP2B1	PRKCZ	redundant	15.6363
P2RX4	RASGRF2	ordinary	14.3101
B3GLCT	SPON1	ordinary	31.5752
MTA3	HIST3H2BB	ordinary	28.9888
DBF4	MCM5	ordinary	78.4383
LRP6	PPP2R5C	redundant	30.3606
PSME3	CDC20	ordinary	44.0547
ATAT1	GNPNAT1	ordinary	21.9143
LCK	STAT5A	redundant	84.4031
PIP5K1C	SH3GL1	ordinary	53.6917
MAPKAP1	AKT3	ordinary	59.2468
CDKN2A	RUNX3	redundant	14.9188
DNAJB6	HSPA2	ordinary	38.482
CDC42	CENPA	ordinary	29.926
SLC9A5	SLC9A7	ordinary	13.5698
ATAT1	NAA30	ordinary	20.245
BRCA1	HIST1H2BH	redundant	39.0157
PSMC2	VHL	redundant	19.2283
PDCD1LG2	CD3D	ordinary	41.6782
ARHGAP10	RHOBTB2	ordinary	41.017
PSMB10	TNFSF12	ordinary	39.6826
ATXN7	HIST1H3H	ordinary	21.1349
PPP2R2A	FOXM1	ordinary	28.6051
PIK3R1	PACSIN1	ordinary	21.3094
FZR1	MCM5	ordinary	26.8323
CD79B	PRKCE	redundant	15.9421
USP13	BECN1	ordinary	14.244
2020-03-02	SLC3A2	ordinary	17.5885
GRIN2D	MYL12B	ordinary	29.3083
SEMA3A	DPYSL3	ordinary	72.8592
ORAI2	CALM1	redundant	22.2629
CAMK2D	MYL9	ordinary	120.13
TRPC4AP	SORBS1	ordinary	123.892
CCNK	POLR2A	ordinary	35.62
TDP1	PRKDC	redundant	48.5309
NEDD8	UBE2F	ordinary	25.9863
ARHGEF12	CDC42	ordinary	31.4111
RMI2	FEN1	ordinary	55.7443
AAAS	CPSF4	ordinary	36.34
SOCS3	STAT1	redundant	67.636
PSMA5	EGLN3	ordinary	12.7698
POLR2E	HIST4H4	ordinary	15.3576
SLC5A6	AHCYL2	redundant	27.0121
GNG12	DGKZ	ordinary	32.4389
NADK	PKM	ordinary	18.2635
RANBP2	SMN1	ordinary	20.6832
PSME3	MAP3K14	redundant	21.5147
ATP2B4	MYL12B	ordinary	63.0801
FGFR1	CYFIP2	ordinary	37.8644
PSMC4	PPP2CB	redundant	30.5223
CBFB	LEF1	ordinary	12.9644
KCNN3	FXYD6	ordinary	92.3574
POM121	WDR33	ordinary	18.7184
UBA52	VAMP8	redundant	21.2685
DVL1	KDR	redundant	18.6747
CCT5	BBS4	ordinary	14.424
ATM	SUMO2	redundant	24.9691
PECR	PHYH	critical	15.6878
MAPK14	HIST4H4	redundant	14.6655
MAP2K1	FXR1	ordinary	31.1368
PIP4K2A	FRS2	redundant	13.3611
CACNA2D2	COLEC11	ordinary	13.5861
HIST4H4	BARD1	ordinary	13.774
TNFRSF10C	TNFRSF10B	ordinary	28.9879
ZCCHC11	EIF4A1	ordinary	19.6022
BIN1	TGOLN2	ordinary	41.5061
PSMA1	LTB	ordinary	13.4266
ESPL1	AHCTF1	ordinary	37.7948
STON1	SLC2A8	ordinary	72.7909
PICALM	CD4	ordinary	13.4278
STARD8	RHOH	ordinary	45.3346
PSMB6	UBC	redundant	30.6533
PLCG1	DAGLA	ordinary	16.0912
LRRFIP1	CD3G	ordinary	44.4146
EYA2	HIST2H2BE	ordinary	16.2853
CNGB1	ATP2A2	ordinary	23.8376
KCNQ4	ATP1A1	ordinary	42.6853
CNOT11	EIF4A2	ordinary	13.924
CACNA1C	DMD	ordinary	270.002
PPM1A	PRKAG2	redundant	69.4029
RRP1	UTP20	ordinary	14.0871
CHST12	CSPG4	ordinary	22.3597
SRC	TRAK1	ordinary	82.0144
TRPC4AP	PRKCZ	redundant	24.6225
CLASP1	DIAPH2	ordinary	27.6079
DCTN1	AR	ordinary	17.6351
GRPEL1	FXN	ordinary	14.7204
P2RX7	MYL9	ordinary	115.101
CD3E	PRKCQ	ordinary	22.6131
CYBRD1	SLC40A1	redundant	54.4268
GMPS	LARS	redundant	31.4629
RYR3	CNGB1	ordinary	144.441
CBLB	ITPR3	ordinary	20.633
ITPR3	ACTG2	ordinary	90.5034
TRPV6	RASGRF1	ordinary	13.4617
ALAS1	PDHB	ordinary	19.8277
FAAP20	FANCD2	ordinary	31.1661
MTMR9	PPP2R5B	redundant	31.3401
SPTBN2	ACTR10	ordinary	13.6386
ARF3	BET1	ordinary	19.4032
CACNA1D	ANXA1	ordinary	23.5462
SRC	FCGR3A	redundant	32.8281
TAF1B	HIST1H2AC	ordinary	15.2365
ATP6AP1	AK9	ordinary	13.8451
LRP5	GSK3B	ordinary	12.92
CCAR2	HSPA2	ordinary	35.9394
IRAK1	CUX1	redundant	23.9539
HADHB	DBT	redundant	19.761
HLA-DRA	LCK	ordinary	115.264
COPS2	DCAF7	ordinary	20.7442
PIK3CD	PTPN13	redundant	15.0319
TOP3A	GTF2H3	ordinary	20.885
KAT5	LIG3	ordinary	20.4972
FNBP1L	SCARB2	ordinary	12.6872
SCN5A	ATP1B2	ordinary	56.8646
TRPC4AP	CALM3	redundant	16.5411
MYO1C	HIST1H3H	ordinary	32.4985
NUP210	SUMO1	redundant	17.8692
B3GAT3	BGN	ordinary	27.0973
CAMK2D	CACNG4	ordinary	22.8914
POM121	INCENP	ordinary	57.6332
RAB33B	COG4	ordinary	21.7455
PSMD6	PPP2R5A	redundant	36.0561
ITSN2	EPS15L1	ordinary	23.4173
DCAF11	NEDD8	ordinary	42.717
CDK1	DYNLL2	ordinary	43.9329
SLC8A1	CACNA2D2	redundant	67.5177
BIN1	VAMP2	ordinary	71.6607
GNG4	CALM1	ordinary	28.86
RPS5	WDR46	ordinary	18.0291
TRPV3	STXBP1	ordinary	13.1966
TRAF6	FCGR1A	redundant	16.2871
RPA3	RAD51AP1	redundant	65.2164
ITPR1	SLC24A1	ordinary	99.6088
PLCG2	TEC	ordinary	12.928
COPS5	CUL3	ordinary	27.9235
CA9	NT5E	ordinary	17.3471
SRI	ATP2B4	ordinary	56.93
PSMD14	APC	redundant	26.9397
POLR2H	HIST1H4I	ordinary	51.1654
IRAK1	MYO18A	redundant	17.4557
PDGFRA	WASF3	ordinary	37.9041
SMAD4	CDKN2B	critical	18.6419
GNAI1	CALM1	redundant	25.5425
PRKACB	PPP1R1B	redundant	23.6029
ARHGAP35	HRAS	ordinary	22.6371
COPS5	FBXL7	redundant	79.2501
TOMM20	HSPA9	ordinary	25.0543
PAK2	CALM1	redundant	23.4368
RNF40	HIST1H2BJ	ordinary	20.5787
AAAS	HSPA1A	ordinary	16.3922
RMI1	RFC4	ordinary	72.1765
RBL2	CDC6	ordinary	38.2184
GPSM3	GNAI2	redundant	61.9229
RYR2	CACNA1C	redundant	198.323
HDAC10	HIST1H2BD	ordinary	29.6228
TRPV4	SLC8A1	ordinary	66.1608
NUP160	HSPA4L	ordinary	24.9696
RB1	CDT1	ordinary	32.843
GAB2	MYO18A	ordinary	14.9318
ARHGAP5	RAC3	ordinary	39.8492
EXOSC5	RPS6	ordinary	21.22
HDAC1	CDK1	ordinary	55.8559
CDK1	H3F3A	redundant	47.1915
NFIX	POLR3H	ordinary	62.5819
AXL	GRB2	ordinary	14.8074
PIK3R5	STON2	ordinary	14.4833
DIAPH2	NUP43	ordinary	18.9497
ARHGAP35	RHOT1	ordinary	17.7434
PPP1R12A	MYL12B	ordinary	133.845
NME1	IFT122	ordinary	25.9854
SAE1	SUMO3	redundant	22.0286
CHN2	RAC3	ordinary	27.0303
CNOT6	EIF4A1	ordinary	19.9452
GRAP2	ITPKB	ordinary	150.323
SLC1A6	TTLL12	ordinary	14.7327
POLE2	EXO1	ordinary	98.1294
RPS23	UTP14C	ordinary	20.5369
PSMD10	HNRNPD	ordinary	17.894
CCND2	RUNX1	redundant	22.2734
TAF5L	HIST1H3H	ordinary	17.0734
SF3B1	HIST1H3H	ordinary	15.3957
HOXA1	HIST1H2BN	redundant	13.1961
PLD1	PITPNM3	redundant	22.6478
CALM1	STXBP1	ordinary	32.4884
VAMP3	PIP5K1C	ordinary	45.9458
AKAP9	PLN	redundant	64.9975
VAMP2	CATSPER1	ordinary	44.4767
ACOT2	ACSF2	ordinary	18.9463
DBF4	PRIM1	redundant	91.1883
ABCD1	PLA2G16	ordinary	16.0192
HLCS	ACACA	critical	15.9647
POLR2D	ATM	ordinary	14.2849
SUCLG1	HADHA	redundant	64.5852
CATSPERG	PPFIA3	ordinary	21.7815
SEC24C	F8	redundant	43.0385
OPLAH	SLC25A22	ordinary	22.7846
CASP6	LMNA	ordinary	42.9045
EP300	VEGFA	ordinary	15.4411
ATG12	ATG10	critical	13.162
PLCD1	DGKG	ordinary	40.6258
CTNNB1	TCF4	ordinary	29.0401
PTEN	GNB2	ordinary	18.4377
EED	HIST1H2BD	ordinary	31.6258
PDGFRB	PDPK1	ordinary	13.561
ISG15	KPNB1	ordinary	18.2378
PSMD11	ANAPC1	ordinary	18.3475
ARHGAP26	RHOQ	ordinary	21.0664
STAT2	STAT1	ordinary	88.3371
GNG11	PRKCD	ordinary	44.6116
SAP18	H2AFX	ordinary	25.6206
OSBP	PPM1L	ordinary	58.4247
PSMC4	TRAF2	redundant	24.668
PPP1R12B	MYH14	ordinary	167.523
CAMK2G	ATP2C1	ordinary	23.6889
ARHGAP27	RHOJ	ordinary	42.8005
ADRA2A	GNB1	redundant	16.4026
2020-09-02	PRKAR2B	ordinary	37.7633
CUX1	VAV2	ordinary	29.3757
NELFB	CHEK1	ordinary	50.3356
ZFHX3	CDKN1A	ordinary	35.53
LDLR	SCARB2	ordinary	24.0292
AP2B1	IGF2R	ordinary	20.0217
PLA2G6	GALNT2	ordinary	24.9992
PTPN22	HLA-DQB1	ordinary	48.2599
SPTBN1	TMED2	ordinary	23.1641
CBL	SYT11	redundant	34.0661
ACOT11	ACSL5	ordinary	13.6902
KAT5	POLR2K	ordinary	18.3431
SAP30	HIST2H2BE	ordinary	14.6502
KITLG	STAT5A	redundant	18.5801
TRPV4	CLCA4	ordinary	18.1717
SUDS3	HIST3H2BB	ordinary	23.2114
SREBF2	CYP51A1	redundant	63.5556
RNF8	SUMO2	ordinary	31.5297
EXOSC3	NOL6	ordinary	55.7879
SH3KBP1	ITPKB	redundant	126.294
TAF9B	HIST1H2BN	ordinary	18.56
CAMK2D	ANXA2	ordinary	21.2062
USP21	IL33	ordinary	23.7301
PSMA4	PPP2R5B	redundant	13.7022
PIK3R3	RAC1	redundant	13.9886
VAMP2	P2RX5	ordinary	34.3377
GNG7	GAB1	ordinary	79.6024
MAPKAP1	SGK1	ordinary	30.3884
CACNB1	TPM3	ordinary	24.4396
AKAP1	LMOD1	ordinary	103.79
CHD4	HIST3H2A	ordinary	24.8213
ARL2BP	CALM3	redundant	15.5953
PIP5K1B	PPP2R5D	redundant	16.4999
PSMC3IP	HIST2H2BE	ordinary	24.6318
COPS2	SPSB2	ordinary	31.0685
POM121	HSPA12B	ordinary	23.3169
CALM2	TNNT2	ordinary	54.0498
DIAPH2	SPC24	ordinary	31.8165
MPC1	DLD	redundant	23.7638
RYR2	ATP2C1	ordinary	68.2011
CDC37	GAB1	ordinary	27.6654
AKAP1	MYL9	ordinary	110.199
STX1A	TRPC1	redundant	29.4532
AKT3	PHF20	ordinary	49.3206
KDM6B	HIST1H2AE	ordinary	57.7705
NUP37	HSPA1L	ordinary	25.8882
NLK	MYC	redundant	47.5843
CACNA1A	CACNB3	redundant	21.7994
CAMK2D	EPB41L1	ordinary	13.7656
NUPL2	HSPA1B	ordinary	14.6647
EXOSC10	WDR75	ordinary	23.9078
PTPN22	HLA-DPA1	ordinary	49.496
SRSF10	SRSF2	ordinary	91.5835
CHRM3	GNAQ	ordinary	67.1363
BRCA1	ERCC6	redundant	28.9917
PSMB5	TNFRSF13C	ordinary	15.4862
GSR	GPX2	ordinary	33.2643
GNG11	CPSF6	ordinary	44.2638
ARHGAP11A	RHOD	ordinary	19.2077
RCOR1	HIST1H2BG	ordinary	19.2016
RAF1	RAP1A	redundant	104.024
SRI	ATP1B2	redundant	54.4059
GAB2	FCGR1A	ordinary	17.2181
PSMD11	AJUBA	redundant	19.6378
MORF4L2	HIST1H2AC	ordinary	14.5413
PRKAA2	TP53	redundant	38.7065
PREX1	RHOB	ordinary	75.1928
CATSPERB	CAMK2G	redundant	21.6591
ERCC2	RAD51D	redundant	19.4167
PDCD1	HLA-DPB1	ordinary	132.916
TPCN1	TPM3	ordinary	24.7621
CUL3	DVL3	redundant	25.9088
SPIDR	BLM	ordinary	43.1583
PIP5K1A	PDGFRA	redundant	29.0002
SLC35A1	ST3GAL3	ordinary	32.4345
CATSPER2	DMD	ordinary	112.081
RASGRF1	NRAS	ordinary	19.6233
NUP205	GEMIN8	ordinary	20.146
NUPL2	ALYREF	ordinary	21.0179
DCUN1D5	CUL4B	ordinary	13.2236
SEH1L	SNRPE	ordinary	16.2324
APP	TPM4	ordinary	39.7519
SLC4A7	SLC9A4	ordinary	29.2346
PSMD3	CD40	ordinary	21.7606
GPSM2	GNAI3	redundant	32.846
SUDS3	HIST1H2BD	ordinary	22.2504
BLM	GTF2H3	ordinary	45.2759
ADRB2	PIP5K1B	ordinary	14.0362
CASK	VAMP2	redundant	35.9635
HLA-DPB1	LCK	ordinary	109.742
STAT3	ICAM1	ordinary	29.3071
METTL3	POLR2D	ordinary	16.8899
MAT2B	MECOM	ordinary	28.1276
ATR	HIST4H4	redundant	34.1796
TIAM1	RHOQ	ordinary	27.5236
TGFB1	ZFHX3	critical	19.6066
GNG12	FXYD6	ordinary	85.5705
EXO1	RFC3	ordinary	92.0809
CDK12	FANCI	ordinary	46.7007
PIK3AP1	ITK	ordinary	95.103
PPP3CC	SFN	ordinary	16.8066
DNAJC2	HSPA12B	ordinary	27.7954
PLA2G4A	ACTR10	ordinary	15.76
PIK3C2A	ARPC4	redundant	33.2012
COPS4	FBXO21	ordinary	22.7638
EXOSC2	NOP58	ordinary	42.3641
PSME2	AMER1	ordinary	13.1342
BOP1	RRP36	ordinary	40.7846
TRPC1	ACTA2	ordinary	105.023
PIK3R5	ABI2	redundant	25.7977
CCNB1	BIRC5	redundant	123.996
ARHGEF7	RHOU	ordinary	18.2298
TSLP	FYN	redundant	50.7369
MTMR3	PLA2G4C	ordinary	15.8001
CDK1	SKA2	ordinary	108.283
PIK3R2	FGFR3	redundant	12.6725
JMJD6	HIST1H3H	ordinary	25.4587
BARD1	HIST3H2A	redundant	24.1782
CNGB1	PPFIA1	ordinary	19.1238
TIMM17A	HSPD1	ordinary	32.0413
PLCB4	OCRL	ordinary	72.9623
SEH1L	SLBP	ordinary	23.7332
ADCY6	PRKACB	ordinary	23.9158
CDK5	FOXO3	ordinary	41.734
NUP37	SNRPG	ordinary	43.8575
ASPH	PLN	redundant	65.2565
DVL1	PDGFRB	redundant	13.9564
PIK3R6	EPN1	ordinary	14.8157
CCNB2	PPP2R1A	ordinary	29.3489
ALOX12	GPX2	ordinary	23.5744
NUP188	TOP2A	redundant	76.6418
SLC24A3	TRPA1	ordinary	52.9388
CHMP3	UBB	ordinary	30.0147
ACADS	ECHS1	critical	23.0092
CTR9	HIST1H2BC	ordinary	25.7343
HRAS	CNKSR1	ordinary	17.3858
EP400	CDKN1A	redundant	35.2094
GNB5	DGKH	redundant	26.486
SUPT4H1	TAF11	ordinary	40.1013
PIP5K1B	ARRB1	ordinary	26.5844
SLC39A7	SLC39A8	ordinary	17.4673
DEGS1	COL4A3BP	redundant	30.1612
GNG10	FGFR1	ordinary	27.5165
SNX9	TGOLN2	ordinary	63.3166
COPS5	FBXO41	ordinary	25.3073
ORAI1	CALM3	redundant	14.5325
DCTD	RHBG	ordinary	19.6936
CAMK2G	CALM3	redundant	20.7046
ARHGEF19	RAC2	ordinary	14.8556
RAD50	H2AFX	redundant	40.2514
PSMD8	ANAPC5	ordinary	17.2133
KDR	FCGR1A	redundant	14.3171
MBOAT7	SLC27A5	redundant	15.9949
RMI1	POLR2K	ordinary	22.0008
EXT1	GPC2	ordinary	26.2046
SLC6A11	TTYH3	ordinary	31.8876
ACOT2	ACSS1	ordinary	18.6488
TOMM5	HSPA9	ordinary	13.1587
CALM2	PDE3A	ordinary	21.5931
HDAC8	GNPNAT1	ordinary	14.6314
AKAP1	CPNE1	redundant	16.7063
RYR3	DMD	ordinary	260.747
SLC6A6	ANO6	ordinary	43.1218
NUP62	NCBP1	ordinary	53.0609
STAM2	EPS15L1	ordinary	15.6083
TRPV6	CACNB3	redundant	20.413
ASH2L	HIST1H2BC	ordinary	17.8227
PSMA2	BIRC3	redundant	24.4317
IL3RA	JAK2	ordinary	23.0335
MAPK14	RPS6KA5	ordinary	43.1111
NUP50	HSPA5	ordinary	14.3699
ARHGEF28	LIMK1	redundant	17.0192
ANK2	TMED10	ordinary	41.2024
RHOC	LIMK1	redundant	35.7918
ARHGEF15	RHOBTB1	ordinary	19.1642
CAMK2D	TLN1	ordinary	122.532
TRPC1	CPNE3	ordinary	21.9989
NUP35	HNRNPC	ordinary	33.5268
NUP62	SMN1	ordinary	17.6797
ARHGAP28	RHOT1	ordinary	12.6668
PSMA2	CCNE2	redundant	24.321
CLCN7	CLCA4	ordinary	17.0988
CACNB2	TMOD1	ordinary	209.95
B3GAT3	AGRN	ordinary	34.7611
CBFB	IL2RA	ordinary	12.9829
SLC38A2	DARS	redundant	17.3233
NME1	AK2	redundant	37.852
FGFR1	FGFR3	ordinary	31.4455
SLC25A28	ISCU	redundant	15.4375
CACNA2D2	PPFIA3	ordinary	12.61
PSMB7	SUFU	redundant	26.5664
NCOA2	G0S2	ordinary	14.233
CALM1	SLC9A6	redundant	20.1535
2020-09-02	TUBB	ordinary	22.0318
GNAI2	CALM2	redundant	16.993
TRPA1	ITGB5	ordinary	19.7034
AKAP9	CALD1	ordinary	94.1196
ARHGEF16	RHOT2	ordinary	28.085
RPS3A	UTP14C	ordinary	19.3516
LGMN	HLA-DRA	ordinary	14.2533
ARHGAP1	RHOB	ordinary	117.115
PSMD14	GTSE1	ordinary	64.5866
SEC23A	CNIH3	ordinary	29.4862
ACLY	ACAT2	ordinary	49.6325
DVL3	PPP2R5C	redundant	26.5915
PSME4	APC	redundant	37.4032
RMI2	CUL4B	redundant	22.4619
PI4K2B	OSBPL8	ordinary	26.6306
BOP1	RPS2	ordinary	21.9255
KCNIP3	SLC12A2	ordinary	17.1066
BRIP1	HMGN1	ordinary	52.5674
CSNK2A1	TP53	redundant	13.8735
GRB2	INPP5A	redundant	47.5252
CCNB1	CDC16	ordinary	27.6957
VAV1	CALM1	ordinary	21.0245
GLE1	POM121	ordinary	15.5545
CALM2	ITGB5	ordinary	21.2998
PIK3R6	VAMP2	redundant	36.1655
CSGALNACT2	BGN	ordinary	37.745
EYA3	HIST1H2BG	ordinary	21.9053
TTC21B	SUFU	redundant	14.4229
PIK3R1	BAIAP2	redundant	21.101
GNG2	AKT3	ordinary	67.7532
KIF23	HLA-DQB2	ordinary	23.1319
PIP5K1B	FYN	redundant	28.9494
HDAC2	HIST1H2AE	ordinary	23.5181
CATSPER2	MYL9	ordinary	112.48
GNAI2	PRKAR2A	ordinary	14.464
A2M	RHOT1	ordinary	45.0532
CD79B	INPP5B	redundant	37.1077
RMI1	POLR2L	ordinary	19.6107
WRN	FAAP100	ordinary	13.5896
PSMB3	SPOP	ordinary	70.113
CTNNB1	HIST1H2BH	ordinary	19.0705
BARD1	TCEA1	ordinary	21.3586
RPS3A	NOC4L	ordinary	24.6821
TRPV3	PLA2G4A	redundant	12.8186
TULP3	PRKAR2A	ordinary	15.6495
MAPKAPK3	CBX6	ordinary	22.9286
HGF	HRAS	redundant	15.9504
NUP43	AURKB	ordinary	41.5879
RYR3	CAMK2D	redundant	133.044
RAB10	EXOC1	ordinary	13.2299
TPCN2	CALM1	redundant	22.1964
PGP	AQP9	ordinary	16.5321
GNG2	RAC1	ordinary	16.274
RANBP2	SNRPB	ordinary	45.3678
FKBP1A	NFATC1	ordinary	30.178
COMMD8	CUL4A	ordinary	13.6127
MTMR9	PPP2R1B	redundant	32.5822
STAT3	TWIST1	ordinary	15.7233
PSMB3	SUFU	redundant	20.715
SLC8B1	CALM3	redundant	13.3939
PIK3CB	AP2A1	ordinary	15.5297
FOXP3	IL2RA	ordinary	77.1926
PDHA1	NAGS	ordinary	21.4642
NAGS	DLST	redundant	32.0402
PIP5K1C	BIN1	ordinary	95.3526
ORAI1	MYL12B	ordinary	14.8629
CALM3	CLCA4	ordinary	18.9139
ARHGAP9	RHOA	ordinary	20.9765
SLC24A1	COLEC11	ordinary	15.4055
KDM7A	MAP2K2	ordinary	12.7969
GNB5	MYO18A	redundant	32.8354
AAAS	SNRPD3	ordinary	30.5219
AKT2	GSK3A	ordinary	57.1898
RFC3	BLM	ordinary	90.1641
RBM28	UTP6	ordinary	42.9682
USP2	TRAF2	redundant	40.094
PSMD3	ANAPC16	ordinary	28.2248
BLM	FAAP100	ordinary	43.9706
NUP214	HDAC4	ordinary	93.2479
LIG1	CCNH	ordinary	37.2645
CDKN1A	ORC1	ordinary	55.6934
PLA2G4A	DCTN3	ordinary	13.4684
CACFD1	SLC24A3	ordinary	41.3897
VAV3	ITK	ordinary	16.9821
CCNB1	SMC2	ordinary	91.3248
FBXO30	NEDD8	ordinary	72.5526
CHN1	RHOH	ordinary	25.9212
ARF5	COPZ1	ordinary	24.6563
SOS2	RHOBTB2	ordinary	14.0425
PSMB8	EGLN1	ordinary	15.1612
GNG7	ATP1B2	ordinary	175.81
CACNA1C	CACNB1	ordinary	77.5767
TRPC4AP	CPNE7	ordinary	13.7574
CACNB2	ATP2A1	ordinary	82.4745
SLC8B1	ATP2B4	ordinary	60.9886
KCND3	ATP1B3	ordinary	40.8307
GRIN2D	RASGRP2	redundant	57.0322
E2F1	EZH2	ordinary	132.037
TPCN2	PYGB	redundant	49.0236
P3H3	COL15A1	ordinary	23.1231
ATP2B4	TPM3	ordinary	66.6831
IRAK1	FGF1	redundant	13.8157
P2RX5	ATP2A3	ordinary	15.0281
SLC6A8	SLC9A9	ordinary	44.8524
CDK1	HIST1H2BG	redundant	54.4743
AK2	SLC25A5	ordinary	41.9388
COPS2	FBXO6	ordinary	22.0789
IL33	CD28	ordinary	19.5084
MBD3	HIST2H2AC	ordinary	37.3106
DCTN4	HSP90AA1	ordinary	26.6519
NCALD	SLC24A1	ordinary	51.7652
TPI1	GPD1L	critical	26.9809
LPIN1	CEPT1	ordinary	15.3888
ASPH	TPM3	ordinary	17.4369
MTOR	AKT3	ordinary	35.8003
ACOT1	ACLY	ordinary	25.1822
ASH2L	HIST1H3H	ordinary	16.8429
PITPNM3	LPIN2	ordinary	12.8648
CACNB1	TMOD2	ordinary	18.6667
PSMC5	RPS27A	redundant	16.4176
CNGB1	SORBS1	ordinary	129.201
NCOA1	HMGCR	redundant	28.1584
CLTC	PLEKHA2	redundant	13.2728
STIM1	SLC24A1	ordinary	18.4358
COPS2	VHL	redundant	18.9843
CNGB1	ACTG2	ordinary	90.0589
USP1	UBC	redundant	29.7758
DKK2	FZD2	ordinary	28.65
SYNJ1	PLEKHA6	ordinary	16.7839
LAMC3	HGF	ordinary	61.7684
P3H3	COL7A1	ordinary	17.304
FOLH1	LRRC49	ordinary	15.4454
TLR6	IRAK1	ordinary	24.0297
RRAGA	IARS	ordinary	18.5747
CALM2	ORAI2	ordinary	17.7875
TRPV6	MYH3	ordinary	64.7189
BRIP1	RFC1	ordinary	76.5467
ITPR2	VDAC2	ordinary	12.6007
PHKB	PYGL	ordinary	21.2238
RPS13	MPHOSPH10	ordinary	26.26
FBXL3	CUL1	ordinary	17.2169
PTPN6	HLA-DQB1	redundant	16.9536
STON1	PLEKHA1	ordinary	65.3022
ATR	FANCM	redundant	41.3193
UBE2N	TICAM1	redundant	15.6139
ERCC6	HIST1H2AE	ordinary	21.6726
RYR3	ITGA1	ordinary	186.753
FIG4	MTMR4	ordinary	33.7522
FNBP1L	TFRC	ordinary	15.6724
NFIX	POLR3C	ordinary	65.8353
ALOX5	GPX2	ordinary	14.2561
P2RX1	RASGRF2	ordinary	96.2785
POLH	XRCC3	ordinary	23.0315
GATAD2A	EP300	ordinary	17.2362
TSC2	MTOR	ordinary	25.4687
PCNA	RMI2	ordinary	87.9307
TRPM7	NFATC3	redundant	24.7406
GNG4	ATP1B2	ordinary	58.521
PTPN11	CYFIP1	redundant	29.7727
PSMA6	TAP2	ordinary	40.3099
SRC	STAT1	redundant	24.1359
P2RX1	MYL9	ordinary	506.197
ABR	RHOD	ordinary	18.3414
CTR9	UBE2B	ordinary	23.0476
PSMB10	CDK1	redundant	39.1164
ATP1B3	KCND3	ordinary	40.8307
DLG4	TPM2	ordinary	80.5234
PIK3CD	LRRFIP1	redundant	43.4295
BLNK	ITPR1	ordinary	93.0081
RPA1	XRCC2	redundant	65.2069
SCN8A	SLC9A9	ordinary	42.7912
CHM	RAB37	ordinary	30.472
NUP88	HSPA5	ordinary	17.3662
GPAT3	AASDHPPT	ordinary	22.8578
POLR1E	HIST1H4I	ordinary	27.3788
PIK3R1	FGFR1OP	redundant	21.4736
KAT5	HIST1H2BC	redundant	26.6026
AKAP13	RHOA	ordinary	44.6181
KAT2A	TAF1D	ordinary	39.6273
POLR2L	ATM	ordinary	19.9286
EIF5	EIF3A	ordinary	37.6215
CLTA	TPD52L1	ordinary	19.2243
CNGB1	STX1A	ordinary	27.2595
ADCY3	PDE7B	ordinary	23.7678
ADCY5	PRKAR2B	ordinary	105.354
PIK3CD	UBC	redundant	28.5363
AKAP1	PRKCA	redundant	21.3714
TP53	BID	redundant	23.0278
ANAPC1	IL6	ordinary	43.4701
ACTB	XPC	redundant	18.9224
VPS72	HIST2H2AC	ordinary	17.1129
PSMA4	LTBR	ordinary	29.0121
BRIP1	XRCC5	ordinary	30.0706
FZD1	PPP2R5C	redundant	20.5953
PSME3	PPP2R5D	redundant	17.1961
COX6C	CYCS	ordinary	19.4772
KITLG	INPP5K	redundant	17.3707
KCNH2	ATP1B3	ordinary	23.9655
NIPA2	MMGT1	ordinary	39.6923
PSMB2	TNKS	ordinary	21.9388
NEK9	NUP214	ordinary	39.3372
PIK3R1	TRIP10	ordinary	22.8894
DDX6	LSM3	ordinary	14.88
TCP1	BBS7	ordinary	26.7771
FGF2	INPP5K	ordinary	47.5155
PPP1R12B	MYL9	ordinary	503.319
PYGO2	H2AFZ	ordinary	32.6255
PIK3R2	EPN2	ordinary	16.1979
NSMCE1	UBE2I	redundant	14.326
SLC12A7	SLC6A6	ordinary	21.5645
P2RX5	RASGRP1	redundant	20.3224
CSF2RB	STAT5B	ordinary	62.4616
AGTPBP1	AIMP2	redundant	23.3464
ATP6V1C1	SLC25A10	ordinary	16.5539
TCF7L1	HIST1H2AE	ordinary	24.6875
GOLGA2	GORASP1	critical	27.3883
AGBL3	EEF1E1	redundant	19.231
ATM	KDM4B	redundant	12.6074
GNA14	INPP5B	ordinary	21.906
SYNJ2	MTMR6	ordinary	24.9352
MFNG	NOTCH3	ordinary	16.0718
PIK3CG	STAM2	redundant	13.8222
RYR2	TCAP	ordinary	63.6731
SMARCD3	GLIPR1	ordinary	19.0476
PSMA7	RBX1	redundant	29.3925
ALG10	RPN2	ordinary	42.5585
SPTBN5	COPB2	ordinary	15.7332
DENND2A	GDI1	ordinary	54.1889
GALNT6	MUC4	ordinary	16.3748
POLR1E	H3F3B	ordinary	13.5103
PSMB3	GTSE1	ordinary	46.3102
NUP155	ALYREF	ordinary	46.1919
TTC21B	PDE8B	ordinary	17.5339
ATP1B2	SLC5A3	ordinary	59.3869
APP	SORBS1	ordinary	122.88
PLPP5	PRKCB	ordinary	36.9341
AK2	ABCC4	ordinary	36.2192
PSMB9	CDK1	redundant	42.2743
GPT	PSAT1	redundant	13.9105
PSMD14	LTBR	ordinary	30.3755
SYNJ2	PPP2R1B	redundant	13.1655
RBBP8	POLR2J	ordinary	21.4632
TRPM2	CAMK2D	redundant	33.9841
HPSE	GPC2	redundant	20.0101
RPS8	RRP7A	ordinary	20.0507
LIG1	RPA1	redundant	53.0568
WRN	RFC5	ordinary	43.4438
GNG5	CNTRL	ordinary	16.2973
ESPL1	CENPO	ordinary	115.374
LTB	TRAF3	ordinary	20.42
IL1RAP	CD86	ordinary	13.4733
CUX1	FYN	ordinary	35.9843
BARD1	POLD1	redundant	55.3172
CBFB	TNFRSF18	ordinary	13.9583
TOMM5	TOMM40	redundant	47.1455
RAE1	GEMIN4	ordinary	30.5915
MYO9A	RHOBTB1	ordinary	31.6412
ATP6V1B1	PKM	ordinary	14.7822
TREM2	MYO18A	ordinary	13.7523
EPN2	ACTR2	redundant	13.0046
C2CD5	EXOC7	ordinary	41.2511
CCNB1	BUB1B	ordinary	139.168
LRP10	GPC6	ordinary	25.1787
XRCC1	POLD3	ordinary	18.8711
BAZ1B	H2AFZ	ordinary	29.5414
GNAQ	TRPC6	ordinary	29.5318
SLC8A1	SLC9A9	redundant	107.001
COPS4	FBXL14	ordinary	19.573
SLC8A1	STIM1	ordinary	93.6532
HSPA2	HSF1	ordinary	34.6671
RFC3	RMI1	ordinary	79.4938
PSMB4	UBE2D1	ordinary	17.5487
PSME1	PPP2R5C	redundant	21.0285
SLC24A3	CATSPERG	ordinary	41.5791
NUP160	CPSF4	ordinary	22.694
SLC26A6	ANO10	ordinary	37.1818
ADCY6	PRKAR1A	ordinary	14.5204
P2RX4	ACTA2	ordinary	78.7584
TYROBP	FGFR3	ordinary	13.0267
RPS3A	NOP58	ordinary	15.0285
SLC8B1	FCN1	ordinary	18.5064
ATP6V0D1	PYGB	ordinary	56.3305
NDC1	HSPA12B	ordinary	43.4007
CACNB3	MYH3	ordinary	72.8422
BLM	TCEA1	ordinary	45.073
COPS8	FBXL19	ordinary	24.4486
EPHA7	NGEF	ordinary	48.8568
RPA2	KAT5	redundant	25.5113
CCND2	TFDP1	redundant	32.9353
RYR3	DLG4	redundant	121.409
MYO18A	FYN	ordinary	26.0672
CHEK2	BRCA1	redundant	46.3732
PSMB1	CDK2	redundant	16.4384
POLD2	BRCA1	ordinary	44.7915
CDC37	CPSF6	ordinary	13.5888
PIK3CG	FGFR1	redundant	30.1393
SIK1	PER1	ordinary	60.9736
PIP4K2B	SYT1	redundant	16.7909
MCOLN1	PPFIA3	ordinary	17.4714
CACNB2	TRPC1	redundant	121.021
RMI1	POLE3	redundant	90.5819
STIM1	TPM4	ordinary	34.64
IL10RA	STAT3	ordinary	29.2541
GTF2H5	POLR2J	ordinary	53.5944
LIG1	PCNA	redundant	89.6984
NUP93	FIP1L1	ordinary	20.2486
SAP30L	HIST1H2BD	ordinary	35.907
KAT2A	NOTCH1	ordinary	21.6826
PPP1CA	CSNK1E	ordinary	13.6076
GNG11	FGFR2	ordinary	38.926
PSMA4	CDK2	redundant	23.6088
SRM	DHPS	critical	20.5242
MTA1	HIST4H4	ordinary	15.7562
HLA-DQA1	ZAP70	ordinary	67.9058
COPS7B	SKP2	ordinary	31.7036
ADCY9	PDE10A	ordinary	45.5344
BLM	UVSSA	ordinary	34.8552
BRIP1	POLK	ordinary	52.8863
STIM1	TNNI1	ordinary	18.512
ADRB2	INPP4A	ordinary	12.8702
ARPC3	SLC2A8	ordinary	18.6719
ADCY9	PDE3B	ordinary	46.4229
IRAK4	ABI2	redundant	26.8871
USP49	HIST1H2BD	ordinary	25.6129
CLASP2	STAG2	ordinary	29.1575
PSMB4	TNFSF12	ordinary	38.5586
RRP1	NOC4L	ordinary	70.4519
RNF111	CUL4A	redundant	13.6848
PSMC3	TNFRSF12A	ordinary	27.4007
P3H1	COL7A1	ordinary	33.6756
PSMC3	UBE2C	ordinary	67.1807
DEPDC1B	RAC1	ordinary	28.0725
SF3B1	HIST1H2BJ	ordinary	20.3606
CD247	ABI2	ordinary	25.1578
EXO1	POLR2D	ordinary	55.9434
CCNB1	HIST1H2BJ	redundant	53.7857
TRPC6	TCAP	ordinary	13.8087
ENTPD3	ENTPD1	critical	41.3303
CALM3	DMD	ordinary	117.864
MCM8	POLE	ordinary	77.3342
SKIV2L2	FCF1	ordinary	20.4881
ARHGEF39	RHOV	ordinary	24.765
NRG4	FGFR1	ordinary	27.7363
AP2A2	PIP5K1B	ordinary	13.4152
HPSE	HSPG2	redundant	51.5501
SLC38A9	EIF4EBP1	ordinary	18.1109
MBD3	HIST1H4I	ordinary	20.7491
PIP5K1A	GNAO1	ordinary	67.3755
SUDS3	H3F3A	ordinary	29.5518
CCNB2	NUP35	ordinary	44.1102
PPP1CC	DIAPH2	redundant	13.8174
NUP37	HSPA5	ordinary	32.1651
DVL2	PPP2R5E	redundant	31.7072
MAPK1	BLZF1	ordinary	16.8138
ATP6V0B	PYGL	ordinary	18.0571
TRMT11	AHCY	ordinary	15.6576
CD3G	CNTRL	ordinary	17.8401
ATR	ORC6	ordinary	40.6695
ADCY9	HCN3	ordinary	54.5766
CHM	RAB5C	redundant	12.613
TRPM7	ITGA1	ordinary	55.0908
UBA52	TGOLN2	redundant	37.8695
RAD50	UBA52	redundant	17.0165
CCNB1	ZW10	ordinary	97.4393
CLTA	TFRC	redundant	13.4254
PSMB8	PPP2CB	redundant	29.3007
ATP1B3	HCN3	ordinary	24.9402
IL1R1	IRAK1	ordinary	14.0828
PSMD10	BUB1B	ordinary	49.461
ATM	RFC3	ordinary	26.2498
PIP5K1A	GNG7	ordinary	62.3812
NAGS	DBT	redundant	27.115
ATP1B3	KCNMB1	ordinary	94.4015
SIRT1	HIST1H3H	ordinary	46.5008
POLD1	RAD51AP1	ordinary	97.4817
PLA2G4A	LPCAT1	ordinary	22.9564
FCGR1A	FYN	ordinary	46.2342
KIF5B	ACTR1A	ordinary	30.3725
HSPA8	IGF2R	redundant	47.9887
ATR	FANCD2	redundant	49.4544
FAM20C	CKAP4	ordinary	27.5199
NAA30	MORC2	ordinary	17.0479
PSME1	TNFSF13B	ordinary	32.5204
NUP205	NCBP1	ordinary	54.3226
PIP4K2A	GNB2	ordinary	15.6656
PYGO2	HIST3H2BB	ordinary	35.751
PSMC4	FZR1	redundant	13.7109
MMP7	LAMC2	ordinary	13.5266
EZH2	H2AFZ	ordinary	85.1385
TNKS2	PTEN	ordinary	51.7085
LAMTOR5	AIMP1	ordinary	20.7292
PTPN11	ABI2	redundant	53.102
PSMB8	LTB	ordinary	18.7133
DNMT3B	H2AFX	ordinary	52.9591
RYR3	ACTA2	ordinary	222.359
ECT2	RHOA	ordinary	31.3216
GPSM3	GNG5	ordinary	19.44
NFIA	POLR3C	ordinary	54.3779
PIP5K1B	CLTB	ordinary	12.7461
PIP4K2C	CD79B	ordinary	18.3991
P2RX1	SLC24A3	ordinary	139.449
POLE3	ATM	ordinary	13.6035
HRAS	AP3B1	ordinary	13.9525
FGFR1OP	FGF7	ordinary	36.4258
PSME3	UBE2C	ordinary	47.7738
CALM1	RAC1	redundant	23.1763
GNG7	INPP5B	ordinary	96.4526
CD247	CD28	ordinary	103.931
SLC24A3	TRPC6	redundant	44.3358
FASN	AACS	ordinary	29.9285
RAE1	WDR33	ordinary	34.081
SIN3B	HIST1H2BC	ordinary	17.9135
EYA3	HIST1H2BN	ordinary	16.4337
PSMC6	EGLN1	ordinary	20.5181
CALM2	TNNI2	ordinary	18.969
PIP4K2A	GNG10	ordinary	17.2671
RNF216	MAVS	ordinary	20.4591
PPAT	GART	ordinary	79.2657
FXYD3	KCNN3	ordinary	31.9966
SAV1	LATS2	ordinary	74.8126
ANK1	TMED9	ordinary	13.8143
CACNA2D1	RASGRP1	redundant	32.9134
IRS1	LCK	ordinary	13.2032
BAZ2A	HIST1H2BD	ordinary	20.1806
MYD88	WASF2	ordinary	14.0166
POLE2	RAD51B	ordinary	38.9838
CACNB3	ATP2A2	ordinary	31.0955
GRIN2D	SLC8B1	redundant	26.7953
AHCYL1	VCL	ordinary	84.6205
CDKN1A	ANAPC2	ordinary	31.8107
HLA-DQB1	CD247	ordinary	74.387
KDM1A	HIST1H2AC	ordinary	24.3895
CCNH	TCF12	ordinary	17.4625
PSMC1	CSNK1A1	redundant	54.653
EXO1	FAAP24	ordinary	69.1472
FZD2	CSNK1A1	redundant	32.4943
HADHA	ALDH6A1	redundant	31.4917
CNGA1	AKAP1	redundant	19.1275
COPS2	FBXO10	ordinary	15.2936
TBL1XR1	ACADM	ordinary	24.7946
MDC1	RAD51D	ordinary	24.9693
PSMC1	GSK3B	redundant	38.9317
CHD4	HIST1H2BH	ordinary	18.9757
CLTC	AP1S1	ordinary	20.8715
POLB	PARP2	critical	14.127
CSK	CD247	redundant	30.0119
SLC24A3	STIM1	ordinary	52.4064
CD3D	PRKCQ	ordinary	16.8417
CACNB1	UNC13B	ordinary	13.1148
LDLR	ADRB2	ordinary	42.9292
LRP1	SDC4	ordinary	17.711
BTK	RASGRP1	redundant	61.9527
SPIDR	XRCC2	ordinary	51.1136
ARHGAP32	RHOG	ordinary	34.3114
CAMK2D	TMOD3	ordinary	30.6292
SUPT4H1	INTS12	ordinary	22.5268
SRGAP2	RHOF	ordinary	19.772
PLD2	PITPNM2	ordinary	22.8318
ACTL6A	CUL4A	redundant	52.9201
PTPN6	STAT2	ordinary	21.8198
NUP160	HDAC4	ordinary	102.22
MYBBP1A	HIST1H2BK	ordinary	23.4993
PIP5K1C	AXL	redundant	54.2274
ATF2	HIST1H2BG	redundant	20.5618
MTX1	VDAC1	ordinary	34.1666
SKP1	IREB2	redundant	20.8342
PI4K2B	ITSN1	ordinary	17.7496
DVL1	STAM2	redundant	24.2629
IDH3A	ADHFE1	ordinary	21.7306
CRLS1	HADHA	redundant	20.3481
POLK	BRCA1	ordinary	53.832
CD247	FGF2	ordinary	54.7835
PIK3R5	TGOLN2	redundant	15.0261
TP53	RGCC	ordinary	25.9004
CDK11B	HAUS5	ordinary	47.4734
PSMC2	TNFRSF12A	ordinary	17.1303
PNPO	RHBG	redundant	18.5375
GALE	GYS1	redundant	14.193
COPS7A	DTL	ordinary	22.9091
TLR3	IRF3	ordinary	20.261
CACNA2D1	AKAP9	redundant	33.1374
GNB4	PRKCB	ordinary	38.3841
PDGFRA	CUX1	ordinary	41.8945
NUP93	SUMO1	redundant	24.5556
CCNB2	RAE1	ordinary	70.039
CLASP1	RAB8A	ordinary	29.0928
P2RX7	STXBP1	ordinary	25.043
GNG12	INPP5K	ordinary	29.7842
PDGFB	AKT3	redundant	41.837
ARID4B	HIST3H2BB	ordinary	23.7824
JMY	TP53	ordinary	38.9517
YWHAB	CLCN6	ordinary	16.8099
RMI1	POLR2C	ordinary	17.0116
DNM3	VAMP8	ordinary	14.8507
SLC39A1	C1QBP	ordinary	16.9746
AP2M1	ROR1	ordinary	48.0772
GNAI1	PRKAR2B	ordinary	31.9432
CHST15	BGN	ordinary	29.2976
CACNA1C	TCAP	ordinary	75.6048
RPS27	RRP9	ordinary	13.4142
ATP1A4	KCNQ1	ordinary	17.6946
NOL12	RRP7A	ordinary	21.5249
NFYC	DHCR7	ordinary	21.7489
SRC	FGFR1	redundant	38.6738
STAT4	CFL1	redundant	20.9939
ADAM10	NOTCH3	redundant	27.7973
SLC24A3	CACNB2	redundant	126.344
DENND4A	CHM	ordinary	35.7005
PPAT	TTLL4	ordinary	45.5388
ERCC3	FANCI	redundant	54.2076
PSMC2	GTSE1	ordinary	58.7476
AKAP1	TPM1	ordinary	138.704
BTK	DGKD	redundant	45.4199
GNG2	DGKA	ordinary	21.9608
CACNB3	RASGRP1	redundant	23.6217
STAT3	IL23A	redundant	14.6302
GPS1	FBXL16	ordinary	18.2299
SPTBN2	RAB1B	redundant	21.038
NUP107	KPNA4	ordinary	19.0927
PIK3R3	ITSN1	ordinary	20.6833
PIK3R5	BTK	redundant	104.927
PSMC2	PPP2R5E	redundant	21.2853
AHCYL1	TMOD2	ordinary	19.0933
KCNJ8	ATP1A1	ordinary	24.1541
CACNA2D2	CALM2	redundant	37.5531
PSMD2	BUB3	ordinary	33.3177
PIK3CA	VAV2	redundant	13.936
PIK3CD	FGFR3	redundant	12.7881
COPS2	FBXO41	ordinary	21.7849
CDK1	LPIN3	redundant	43.2973
MED25	CD36	ordinary	14.2144
HIST1H2BJ	SUMO1	ordinary	24.2727
ARAP3	RHOA	ordinary	16.783
PSMC1	NPEPPS	ordinary	24.7249
ZFPM1	HIST1H3H	ordinary	19.797
CDK5	PRDX1	ordinary	22.3662
RANBP2	HSPA14	ordinary	33.9564
CCNB2	RANGAP1	ordinary	51.3498
COPS6	SKP1	redundant	13.8683
PSMB2	PPP2R5C	redundant	39.585
PIK3CD	AGFG1	ordinary	15.1823
ARHGAP21	RHOA	ordinary	13.1992
AHCYL1	TPM2	ordinary	74.8471
APP	TNNC1	ordinary	12.7614
PSMC2	UBE2C	ordinary	57.5972
VAMP2	CACNG4	ordinary	37.7225
CALM1	ITGA1	ordinary	90.533
RFC3	CHEK1	ordinary	84.4575
CACNA2D3	SLC8A1	ordinary	60.3598
CACNB3	DMD	ordinary	120.143
JUN	MAPK6	redundant	66.5209
SLC6A6	SLC4A7	redundant	32.701
OCRL	CDC42	redundant	24.5892
CLIC2	TPM3	ordinary	27.2814
NUP98	HSPA12B	ordinary	25.8395
PSMB3	RPS27A	redundant	36.7328
TOP3A	MNAT1	ordinary	40.0086
MOV10	RUNX1	ordinary	18.5398
NUP188	SNRPG	ordinary	18.9754
GNAZ	PDE4B	redundant	66.3493
PSMC4	PRICKLE1	ordinary	13.0526
NUP98	SNRPE	ordinary	22.1796
NUP155	HSPA13	ordinary	43.3209
LEO1	HIST1H2BG	ordinary	18.54
RAD1	CHEK1	ordinary	67.7998
STX5	SEC24B	ordinary	18.795
ISG15	UBA52	redundant	35.5221
HIST2H2BE	H2AFX	ordinary	37.0362
AGBL5	EPRS	redundant	13.7418
RYR1	TPM2	ordinary	69.1449
GPSM1	GNG7	ordinary	75.0508
CD86	VAV1	ordinary	75.8789
COPS7A	COMMD8	ordinary	16.0095
CREBBP	HSPA2	ordinary	40.0955
GNG5	FGFR4	ordinary	20.8411
PLCD4	CALM2	ordinary	174.492
PSMD8	SPRED3	ordinary	37.9786
ATR	SYCP2	ordinary	22.4373
SMPD4	COL4A3BP	redundant	37.5589
GNAZ	IQGAP1	ordinary	44.0566
GPS1	FBXL18	ordinary	20.2667
IRAK3	LY96	redundant	26.1852
PSME2	UBE2D1	ordinary	13.144
ATP6V1B1	GUK1	ordinary	14.1669
NDC1	AURKB	ordinary	70.4689
PSMA7	CUL2	ordinary	16.4163
CD28	FGFR1OP2	ordinary	17.578
CDK11A	NEK2	ordinary	30.3457
RELB	NFKB2	ordinary	158.057
HMGN1	ERCC6	ordinary	18.6232
VPS4A	UBA52	redundant	23.3138
PIP5K1A	MTMR1	ordinary	16.6596
BRAF	FAM114A2	ordinary	15.2139
FGF2	CYFIP2	ordinary	52.6365
PDCD1LG2	HLA-DPB1	ordinary	48.753
CAMK2G	CREB1	redundant	21.7352
NCALD	CACNA1C	redundant	144.052
SPTBN1	TMED9	ordinary	17.5407
CACNA2D3	ACTG2	ordinary	74.55
SH2D2A	FCGR2A	redundant	34.0299
HDAC8	HIST1H2BG	redundant	25.5046
ARID4B	HIST1H2BG	ordinary	20.3115
PGM2L1	PGK1	ordinary	25.3195
TRPM2	CPNE7	ordinary	13.2578
CAMK2D	VDAC3	ordinary	13.363
PTEN	RAP1B	redundant	12.619
GPS1	CUL1	redundant	18.1605
SLC1A6	LRRC49	ordinary	32.1704
GNAS	RAPGEF4	ordinary	14.2168
ST3GAL6	ACAN	ordinary	22.6515
ARF4	KDELR1	ordinary	28.0841
ACAA2	HADHA	ordinary	14.5321
PSMB8	PPP2CA	redundant	17.3667
BRIP1	FANCM	redundant	92.0086
PSMD3	PRICKLE1	ordinary	25.3864
[truncated: 42,991 more rows]

## Sheet: BRCA
node1	node2	edge_type	activity
NUP153	HSPA12B	ordinary	170.568
NUP98	CDCA8	ordinary	209.7
SOCS1	LY96	redundant	114.414
SOCS1	TLR2	ordinary	62.2656
PAF1	HIST1H2BC	ordinary	106.893
EGFR	FGFR3	redundant	91.5085
NFYA	DDIT3	ordinary	40.7187
SLC7A7	ATP1A3	ordinary	88.5965
CACNA2D1	ATP2A3	ordinary	253.871
PIK3CA	CD3D	redundant	59.6602
SH2D2A	CYFIP2	redundant	106.072
INPP5K	AP2A2	ordinary	113.022
NMNAT2	NADSYN1	critical	85.6958
PLAT	PDGFD	ordinary	226.607
PIP4K2C	ERLIN2	redundant	97.6325
ATP6V1E1	ADPGK	ordinary	27.916
CATSPERG	ANXA1	ordinary	354.61
FGFR1OP2	FYN	ordinary	113.134
NOL12	HEATR1	ordinary	31.2569
PIK3R6	BIN1	ordinary	206.889
ACVR2B	BMPR1A	ordinary	110.288
GNG7	PRKCQ	ordinary	111.299
HIST3H2BB	CHEK2	ordinary	150.68
UIMC1	HIST1H2AG	ordinary	64.9844
RYR3	SLC8B1	redundant	199.569
CCNB2	SEC13	ordinary	319.212
KDR	RAC1	redundant	124.102
STAT4	LCP1	ordinary	287.022
PSMB7	PPP2R5C	redundant	33.0541
FCGR1A	FGFR1OP	ordinary	118.392
RIOK3	RPS4X	ordinary	18.1204
ATP1A4	SLC38A3	ordinary	19.17
TADA3	HIST2H2BE	ordinary	107.998
COPS8	KLHL25	ordinary	21.177
PIP5K1A	WASL	ordinary	96.1023
CALM3	TNNT1	ordinary	71.7561
CHMP4A	UBA52	ordinary	40.7572
AGO4	CDKN2A	ordinary	134.294
GFRA1	KRAS	ordinary	58.5512
GNG11	INPP5K	ordinary	492.673
GGT7	CAMK2B	redundant	19.6172
ATP6V1F	AK7	ordinary	69.0251
ELL	RPS27A	redundant	43.6769
MAPK3	NCKAP1	redundant	26.0732
MYD88	LAT2	ordinary	131.886
PIP5K1C	GNAI3	redundant	61.4572
SEC23A	SEC22B	ordinary	43.003
COPS4	WDR5	ordinary	58.931
PSMA4	CDC16	ordinary	87.0606
ADCY7	AKAP5	ordinary	43.9887
POM121C	SNRPF	ordinary	63.7823
GNAI1	CACNA2D1	ordinary	602.916
ANK3	KDELR3	ordinary	47.32
PLCE1	DAGLB	ordinary	64.9436
MTMR14	PLBD1	ordinary	21.0376
GTF2H5	POLR2B	ordinary	19.8471
CACNG4	ATP2C2	ordinary	94.3782
CALM2	PDE10A	ordinary	29.5638
PCP2	GNB1	redundant	47.6637
AP2A1	DAB2	ordinary	123.079
CACNA1D	CACNA1F	ordinary	105.155
ARRB1	MAPK3	ordinary	53.5496
DZIP1	GLI3	redundant	24.7152
HCN3	ATP1A4	ordinary	64.8689
SLC25A4	GNAI1	redundant	465.978
MCOLN1	MYL12B	ordinary	19.8793
FGF10	HRAS	ordinary	32.3983
VCL	MAPK1	ordinary	122.985
IVD	MCCC1	ordinary	55.4059
RPL38	UPF1	ordinary	28.3813
RFC5	XRCC2	ordinary	182.077
SLC25A13	QARS	redundant	20.8027
KIF2C	HLA-DRB1	ordinary	222.201
EXOSC6	DIEXF	ordinary	26.5473
SIRT1	TAF1B	ordinary	45.84
GNG12	DGKA	ordinary	61.8915
SEC11A	RPL36AL	ordinary	38.7853
JUN	KDM6B	ordinary	169.563
TRIM24	RAC1	ordinary	41.2156
DNA2	RFC1	ordinary	176.124
SRGAP3	RAC1	ordinary	26.6881
LPCAT3	ATAT1	redundant	33.6447
PIK3CD	BAIAP2	redundant	79.5634
FBXO11	CUL1	ordinary	61.6671
BRD8	HIST1H4I	ordinary	115.073
SPRED2	RASAL3	ordinary	58.1522
PIK3R2	TGOLN2	redundant	178.363
ARHGEF40	RHOBTB2	ordinary	285.443
P3H2	COL28A1	ordinary	67.254
ATM	RBX1	redundant	108.524
PSMD8	ANAPC16	ordinary	50.8565
HLA-DQB1	ZAP70	ordinary	239.865
ATP6V0C	ARL2BP	ordinary	110.104
ATP6V0B	AK7	ordinary	148.756
CAMK2G	CPNE7	ordinary	86.0208
PIK3CB	CD80	redundant	115.032
EXO1	POLR2E	ordinary	210.739
HK2	SLC37A1	ordinary	136.336
PHF21A	HIST1H3D	ordinary	110.693
CAPZB	HSP90AA1	ordinary	57.5386
CNIH2	SEC24C	ordinary	163.333
HIST1H2BC	CHEK2	ordinary	148.887
SUPT16H	CHEK1	ordinary	136.86
PTEN	FGF7	redundant	206.11
EXO1	POLR2L	ordinary	222.534
SLC35A1	ST8SIA2	ordinary	55.7438
RAB3IP	RAB8A	ordinary	177.589
ARHGAP6	RHOBTB2	ordinary	106.374
POLR2H	FANCI	ordinary	286.163
SMYD3	HIST1H4H	ordinary	184.592
CACNA1F	PPP3CA	ordinary	16.2186
AGPAT4	SLC27A2	ordinary	32.1427
BIRC2	LY96	redundant	27.754
HIST4H4	UBE2I	ordinary	88.7252
NCOA2	AKAP9	redundant	47.4721
P2RX4	CAMK2G	redundant	77.0116
USP21	TAB1	ordinary	114.857
IRAK1	CYFIP2	redundant	97.7001
GPS1	SOCS3	ordinary	222.065
SLC25A16	BCKDHB	ordinary	148.308
SUCLA2	CPT2	ordinary	191.102
FKBP1B	TNNT1	ordinary	33.5506
TSC1	RRAGD	ordinary	113.132
COPS7A	BTRC	ordinary	31.0915
CCNB2	CENPU	ordinary	526.927
PIP5K1A	RAP1B	redundant	77.3892
EXO1	FANCE	ordinary	376.487
BRCA1	SYCP2	ordinary	109.88
EIF5	EIF4G1	redundant	59.7418
NRG1	INPP5J	redundant	108.243
CHD4	HIST1H2AC	ordinary	141.47
AGFG1	ACTR3	ordinary	179.019
ADCY9	RAPGEF3	ordinary	188.826
PDGFB	KRAS	redundant	48.6978
PEMT	PTDSS1	ordinary	117.648
RYR1	CALD1	ordinary	280.897
RORA	NPAS2	redundant	70.1646
GNPDA1	MPI	ordinary	60.9786
SPTBN5	COPZ1	ordinary	60.2431
FURIN	PDGFA	ordinary	128.525
CACNA2D1	TNNI1	ordinary	inf
ARHGEF19	RHOH	ordinary	68.3031
AGBL5	RARS	redundant	41.7108
DAPP1	CALM2	ordinary	59.5054
SH3KBP1	NCK1	ordinary	238.036
PIK3CA	FGF2	redundant	252.476
FAM13A	RHOQ	ordinary	961.471
PSME2	SKP2	ordinary	108.947
COPS8	SPSB2	ordinary	83.5896
GNG2	ITPKC	ordinary	344.628
ROCK1	MYH9	ordinary	42.3671
MAN2B2	MANBA	critical	39.7272
MCAT	HADHA	ordinary	160.86
ARHGEF4	RHOQ	ordinary	388.294
INPP5J	AP2A1	ordinary	50.1144
GPSM3	ACKR3	ordinary	171.632
PIK3R5	AP2A1	ordinary	42.1603
PRKAG2	LAMTOR5	ordinary	65.2734
KCNIP4	ATP1A2	ordinary	437.849
TCIRG1	DTYMK	ordinary	192.944
TAGAP	RHOC	ordinary	62.3273
TNFSF13B	MAP3K14	ordinary	58.5031
CTTN	VAMP2	ordinary	129.507
B3GNT5	MUCL1	ordinary	19.8062
PSMC5	LTBR	ordinary	51.0738
HMGCR	ACSL4	redundant	125.658
AGPAT3	LPIN1	redundant	75.4727
RUNX3	TEAD1	ordinary	171.707
DDX58	CASP8	ordinary	55.7353
ST8SIA2	SLC35A1	ordinary	55.7438
PSMD6	CKS1B	ordinary	59.2755
RPS15A	WDR36	ordinary	44.2706
SLC35A3	MGAT4B	ordinary	101.245
CEP152	AURKA	ordinary	299.131
IRAK3	TOLLIP	ordinary	61.9364
ST3GAL6	OMD	ordinary	50.9968
PRKAA1	RB1CC1	ordinary	55.0766
CDK1	H2AFZ	redundant	545.197
UBE2V1	PRKCQ	redundant	37.5408
CDK6	TFDP1	ordinary	73.8706
SLC52A2	RFK	ordinary	146.536
DUSP7	MAPK7	ordinary	51.7426
ATP1A2	GNB2	ordinary	464.34
PIP4K2B	GNA15	redundant	18.5899
B3GLCT	THSD7A	ordinary	91.0961
MAPK7	MEF2A	ordinary	39.0963
SYNJ2	M6PR	redundant	31.4682
MAT2B	SLC25A26	redundant	82.5154
ATF2	HIST1H4H	redundant	83.7131
EYA2	HIST1H2BC	ordinary	97.8138
PDPN	PRKCQ	ordinary	40.5285
UBC	PIP5K1A	redundant	63.3408
CALM1	GRIN1	redundant	76.5821
USP21	TRAF2	redundant	245.554
CD36	IRAK2	ordinary	496.216
ERCC1	ATM	redundant	52.5183
ST3GAL3	MUCL1	ordinary	118.229
FTSJ3	DDX49	ordinary	94.0504
CLIC2	RASGRF2	ordinary	291.92
CAMK2G	AKAP1	redundant	45.465
AK9	ATP6V0E2	ordinary	44.6861
PSMB6	UBB	redundant	182.857
UBA52	RFC1	ordinary	90.3497
DDX21	H2AFX	redundant	147.855
MCOLN1	TLN1	ordinary	181.073
SUCLA2	ACSM1	ordinary	180.313
NFIA	POLR3K	ordinary	178.079
LIG1	AQR	ordinary	118.121
DVL2	AXL	redundant	72.762
PCP2	CCR5	ordinary	69.3433
FRS2	LCK	ordinary	28.2972
PSMC3	CDC27	ordinary	65.4978
ORMDL2	MORC2	ordinary	129.987
PLCE1	PRKCD	ordinary	38.7619
CARM1	HMGCS2	redundant	50.3388
RBL2	CDC25C	ordinary	305.65
GNA14	TRPC6	ordinary	93.0985
PSMC2	CDC20	ordinary	290.06
CDK1	CDC26	ordinary	240.206
PSMA6	MAD2L1	ordinary	259.79
PIK3CG	CLTCL1	ordinary	80.8262
PSMA4	OAZ2	ordinary	83.6068
PSMD7	AJUBA	redundant	15.0494
PSMA5	BIRC3	redundant	115.799
KDM4A	SUMO1	ordinary	56.1876
ZMYM2	ABI2	ordinary	116.755
USP1	MUS81	ordinary	36.6774
STAT3	JUNB	redundant	31.7952
GRB2	SYT11	redundant	74.5202
EPC1	HIST4H4	ordinary	103.771
SLC7A11	CDO1	ordinary	515.764
PSMA2	NPEPPS	ordinary	44.1982
CACNA2D4	CPLX1	ordinary	61.3604
PSMD9	UBE2E1	ordinary	33.2357
TRAPPC4	CHML	ordinary	72.5585
MYD88	ERLIN2	ordinary	69.186
KAT5	RFC4	ordinary	95.9395
PSMB6	SMURF2	ordinary	31.1432
ICOS	CUX1	ordinary	57.5076
CPT1B	AACS	ordinary	37.7297
PIK3CD	VAMP3	redundant	211.114
COPS2	COMMD8	ordinary	85.9628
SLC4A7	CAMK2G	redundant	18.6052
SMAD4	SMAD7	redundant	81.4225
SRC	CD247	redundant	64.198
ITSN2	ADRB2	ordinary	431.797
PSMA6	OAZ3	ordinary	125.146
AKT1	GUCY1A3	ordinary	87.7131
MCOLN3	VDAC3	ordinary	28.105
ATP2B1	PPP3R1	ordinary	67.8828
SUMO1	KDM4B	redundant	107.146
XRN2	RPS15A	ordinary	20.4806
CBL	IGF2R	redundant	181.328
EIF5	RPS6	ordinary	28.9038
FGFR1OP	STAT3	ordinary	23.5863
PIP5K1C	FGF18	redundant	30.4429
PSMC4	SKP1	ordinary	113.163
PSMB2	PRICKLE1	redundant	47.2583
RNLS	PXDN	ordinary	28.4353
HBEGF	BRK1	redundant	74.4469
GNG4	INPP5J	ordinary	55.1114
TRPV2	ATP2A2	ordinary	16.8881
EP300	HIST1H2AG	redundant	57.5024
ARHGAP33	RHOT2	ordinary	216.213
SLC25A13	MARS	redundant	180.547
PCOLCE	COL24A1	ordinary	101.56
SUOX	PRDX3	ordinary	16.2489
ATP1B3	KCNN4	ordinary	38.0089
LDLR	LRP2	ordinary	13.5642
TRPC4AP	PYGB	redundant	23.1672
EXOSC9	WDR46	ordinary	60.7288
PSENEN	DTX2	ordinary	194.019
PDGFRB	INPP5D	ordinary	31.2083
PSMC5	PPP2R1B	redundant	283.671
MTA2	HIST3H2A	ordinary	92.0872
RFC2	RAD51AP1	ordinary	356.469
P3H3	COL5A3	ordinary	94.1663
MED1	TXNRD1	ordinary	42.1688
DLG1	VDAC1	redundant	59.3892
NIPAL2	MMGT1	ordinary	53.1071
DNA2	FANCI	redundant	441.63
PCP2	CXCL16	ordinary	46.2209
TAF1B	HIST1H2BJ	ordinary	86.8133
IL33	WASF3	ordinary	451.197
RBBP4	BRD1	ordinary	41.3009
TAF1A	HIST1H2BG	ordinary	67.1394
ASB14	CUL5	ordinary	67.6819
ATP2B4	ATP2C2	ordinary	158.246
PIP4K2C	PIK3R3	ordinary	115.356
ORAI1	SORBS1	ordinary	inf
CCDC8	BIRC5	ordinary	302.451
RMI1	APEX1	ordinary	134.994
PSMC5	NPEPPS	ordinary	36.1697
RAE1	AURKB	ordinary	270.773
GPSM3	CXCL8	redundant	22.3666
PIP5K1B	EGFR	redundant	59.6155
PIK3R3	AKT2	redundant	47.5225
COPS8	SKP2	ordinary	40.4142
POLR1D	HIST1H2BN	ordinary	68.1458
NUP85	HSPA4L	ordinary	69.7158
HIST4H4	H2AFX	ordinary	183.113
PSMD12	TNFSF12	ordinary	170.105
ERBB3	NCKAP1	ordinary	56.9913
NME1	TTC21B	ordinary	148.945
ANK2	TMED9	ordinary	427.833
HIST1H2BD	H2AFX	ordinary	268.947
LEF1	HIST1H2BG	ordinary	152.251
HPN	MST1	ordinary	165.327
PIK3C2B	ACTR3	redundant	77.7996
NUP214	PHAX	ordinary	24.1726
XRCC5	TMEM173	ordinary	41.6058
DVL1	EPHB6	ordinary	47.5416
CTH	SPTLC1	ordinary	21.2581
LPGAT1	ACSS2	redundant	394.098
NUP188	CPSF4	ordinary	25.2062
RBBP8	HMGN1	ordinary	101.194
FOLH1	GCLM	ordinary	26.6705
GLE1	TPR	ordinary	83.2657
NFYA	PMVK	redundant	90.4912
CHAC2	CNDP2	ordinary	92.0441
SLC4A5	SLC4A8	ordinary	45.9622
DVL1	PIK3R2	ordinary	134.407
PSMB10	NFKB1	redundant	35.4969
TAF6L	HIST1H3H	ordinary	147.635
PIP4K2A	TF	redundant	62.0082
PPP5C	NRAS	redundant	76.5448
ORAI2	TMOD1	ordinary	334.086
POLK	RAD50	ordinary	465.983
SLC25A16	CPT2	ordinary	74.327
RBBP8	CCNH	ordinary	42.0839
DCTN5	HSP90AA1	ordinary	96.7637
GNGT2	WASF2	ordinary	119.058
SYDE2	RAC3	ordinary	66.4083
VAMP7	SH3D19	ordinary	530.419
ITSN1	ARPC1B	ordinary	552.726
PTGS2	PTGIS	redundant	203.553
ANO1	SLC6A6	ordinary	30.6995
TYROBP	KL	ordinary	287.078
ASB7	NEDD8	ordinary	44.6378
CALM1	PYGL	redundant	98.5455
P2RX7	PLN	redundant	216.795
FXYD6	SLC6A1	redundant	71.9242
CEACAM1	FN1	critical	150.479
FKBP1B	VAMP2	redundant	144.149
PSMB6	CDK2	redundant	72.4864
HAUS5	AURKA	ordinary	270.331
CLTCL1	AGTR1	ordinary	93.0518
MMP9	CDH1	redundant	79.001
FGFR3	BRK1	ordinary	65.0167
FAM13B	RHOBTB2	ordinary	86.0998
MGLL	AQP9	ordinary	284.436
PIP5K1C	PIK3CD	redundant	21.4069
CD3D	ARPC5	ordinary	83.0843
ATP1A4	KCNIP4	ordinary	50.9685
BRD1	HIST1H3D	ordinary	106.82
DEK	HIST1H4I	ordinary	125.327
RPS15A	EMG1	ordinary	27.8466
CA13	ATP6V1D	ordinary	20.3534
CACNA2D1	MYL6B	ordinary	209.324
OSBPL10	SACM1L	ordinary	48.5812
IL1RAP	FCGR1A	ordinary	109.848
MET	BCR	ordinary	53.8041
ATP1B1	SCN7A	ordinary	69.5974
AGTPBP1	BCAT1	ordinary	76.5655
DHCR24	CYP7B1	ordinary	67.7177
SPCS2	RPL21	ordinary	86.1603
CAMK2G	SORBS1	ordinary	inf
PIK3R1	CD3G	redundant	153.699
ACTR8	RAD23B	ordinary	35.7358
HGS	EGFR	redundant	81.2587
ST3GAL4	MUC15	ordinary	69.4245
ACTR1B	ACTR1A	redundant	33.3585
TRPV4	DYSF	ordinary	35.664
REEP4	OR51E1	ordinary	163.286
TNRC6C	NOTCH4	ordinary	239.965
GNB1	ATP1A1	ordinary	19.4553
PTPN6	HLA-DRB1	redundant	275.374
AGTPBP1	TTLL1	ordinary	31.4048
TAF10	HIST1H2BH	ordinary	125.427
CEPT1	PLA2G4A	redundant	76.6435
IFT140	AKAP5	ordinary	74.6529
TBL1XR1	FADS1	redundant	36.5179
GNG2	DGKI	ordinary	382.593
PLD2	PLA2G2A	redundant	53.0748
CCNB2	TPR	ordinary	213.069
PSMB2	TNFSF14	ordinary	53.6408
ARHGAP10	CDC42	ordinary	165.534
PDGFRB	BRK1	ordinary	14.3134
SEH1L	HSPA9	ordinary	65.1946
RPS27A	FANCM	redundant	70.6253
CALM3	TRPC1	redundant	157.267
ITPR1	TMOD2	ordinary	118.288
SPTSSA	ACLY	ordinary	37.8818
PSMA3	NUMB	ordinary	75.926
GNG11	NCKAP1	ordinary	460.221
ARFGAP3	COPE	ordinary	100.663
IFT122	GLI1	redundant	47.4697
MAT2B	GAMT	ordinary	42.5962
DNAL4	AP2A1	ordinary	93.9275
NUP85	FIP1L1	ordinary	96.0986
FAM20C	IGFBP7	redundant	16.554
PREX1	RAC2	ordinary	60.0334
NUP85	KPNA5	ordinary	160.445
CACFD1	DES	ordinary	411.67
BARD1	POLR2C	ordinary	90.8506
SMAD2	SMAD7	redundant	94.7373
SPCS3	RPL30	ordinary	13.5112
PSMD1	ANAPC5	ordinary	37.3343
ATP6V1H	ABCC4	ordinary	35.8494
ABCA5	ABCA6	ordinary	537.78
TRPC4AP	STXBP1	ordinary	114.163
CSF2RA	KRAS	ordinary	56.0533
AP2A1	VAMP4	ordinary	65.2981
COMMD2	UBE2F	ordinary	50.9563
PSMD10	CCNE2	redundant	209.239
PSMA6	RBX1	redundant	103.503
SPCS1	RPS5	ordinary	46.851
CATSPERB	PRKCA	redundant	63.7737
TOP3A	PRPF19	ordinary	90.5886
NUP43	CPSF3	ordinary	73.5867
PIK3R5	TFRC	redundant	48.7408
CACNB1	RAB3A	redundant	80.6133
CRLS1	BCKDHB	redundant	52.7443
PFAS	TTLL4	ordinary	15.034
NMT2	ACSL4	ordinary	497.852
PDGFA	LCP2	redundant	128.048
SLC25A6	WDR19	ordinary	66.7962
TNF	CEBPA	ordinary	313.253
COMMD8	CUL5	ordinary	84.1247
ATP1B2	ARL6IP5	redundant	160.209
RPL39L	UPF1	ordinary	84.1619
BRAF	CLCN6	ordinary	270.837
PIK3R1	VAMP3	redundant	366.402
ETHE1	TST	critical	40.5121
DNAJC6	SNX9	ordinary	32.7154
ATM	MDM4	redundant	168.757
SEC11C	SEC61A2	ordinary	103.139
PPP2CB	RBL1	ordinary	73.0046
SHB	BCAR1	ordinary	109.702
CALM1	HRAS	redundant	60.8653
RFC5	KAT5	ordinary	60.0764
GPS1	LMO7	ordinary	76.2664
P2RX7	PPFIA1	ordinary	16.8189
ITPR2	MYL9	ordinary	143.061
CAPZA1	FKBP4	ordinary	200.305
UBC	XRCC2	redundant	170.732
CAMK2D	VCL	ordinary	81.556
PIP5K1B	UBC	redundant	26.1839
AP2S1	LRP2	ordinary	86.111
TPR	HSPA12B	ordinary	186.497
RBBP5	HIST4H4	ordinary	80.9146
PIK3CD	ARPC2	redundant	123.531
SLC26A6	CLCA2	ordinary	47.5503
NCOR2	HIST1H2BH	ordinary	107.986
SLC25A6	GNAL	redundant	289.869
ERCC6	H2AFX	ordinary	154.677
SNW1	HES1	ordinary	17.6711
CALM3	ANXA1	ordinary	364.369
CERS2	SLC27A5	ordinary	137.818
PIP4K2A	CUX1	redundant	17.1767
RPS27A	ISG15	redundant	132.971
HLA-E	SOS1	ordinary	130.925
RUNX1	CAMK2D	redundant	34.2709
SLC25A4	ADCY7	ordinary	99.197
GPS1	RBBP5	ordinary	102.905
AAAS	WDR33	ordinary	30.1447
PIK3CD	PACSIN1	ordinary	151.326
MTOR	AKT1S1	ordinary	59.2512
NEK6	NUP50	ordinary	61.7943
CD79A	RASGRP3	redundant	67.3584
PIK3R6	CBL	redundant	78.1681
ORAI1	TPM1	ordinary	52.6551
SOCS2	JAK1	redundant	124.014
CTPS1	SLC25A12	ordinary	116.113
INPP5D	INPP4A	redundant	123.832
PACSIN2	EGFR	ordinary	35.2562
GNAI1	GRIN2D	redundant	480.378
TPCN1	PXN	redundant	102.288
SH3KBP1	ARPC5	redundant	144.852
PKM	LDHB	ordinary	113.658
RBBP7	HIST3H2BB	ordinary	148.41
REEP5	GNB1	ordinary	13.0705
SEC23A	TMED2	ordinary	97.1688
CAMK2D	JAK1	redundant	100.632
PCP2	CCL19	ordinary	50.3168
PIK3CG	BTK	redundant	340.47
ATP1A3	SLC22A4	ordinary	80.6569
FAM20A	LAMC1	ordinary	156.854
MED27	LPL	ordinary	inf
ITPR2	PPP3R1	ordinary	22.52
AK3	NME4	ordinary	252.878
PIK3R2	RAC1	redundant	108.55
LPCAT1	MORC2	redundant	160.959
OCRL	SYT1	redundant	65.9325
PSMB2	TNFRSF1B	ordinary	73.8891
RAD50	FEN1	ordinary	154.004
TP53	HIRA	ordinary	15.5841
GNB1	ATP1B3	ordinary	20.6685
IKBKB	REL	ordinary	29.0453
DCTN3	AURKA	ordinary	212.632
INPP5K	ADRB2	redundant	470.937
LIPT1	PDHX	redundant	77.0597
SYNJ1	PLA2G12A	redundant	57.5448
CD79B	TRPC6	redundant	86.434
HADHB	ACAA2	redundant	214.776
NUP205	FIP1L1	ordinary	88.9882
CLCN4	ANO10	ordinary	34.6885
RBBP8	RPS27A	redundant	25.4139
CACFD1	CPNE7	ordinary	218.299
GMPS	GLUL	redundant	64.2384
MPHOSPH6	UTP4	ordinary	37.8143
PIP4K2C	FGF1	redundant	338.883
TF	INPP4A	ordinary	59.0645
CLTB	ARPC4	ordinary	194.144
COPS2	GAN	ordinary	55.6426
VAV2	PRKCA	ordinary	181.418
SMS	MTAP	redundant	129.947
CACNA1F	PYGL	redundant	75.6454
HIST3H2BB	NCAPH2	ordinary	109.072
PTPN11	FGF18	redundant	77.0724
KDR	SYK	redundant	134.979
VEGFA	AXL	redundant	73.7478
FCGR2A	VAV2	ordinary	142.633
DENND1C	RAB8A	ordinary	220.212
P3H3	COL13A1	ordinary	65.2038
REPS1	ACTR2	ordinary	90.3842
NCOA1	ATP1B2	redundant	153.679
NUP62	HSPA4	ordinary	170.518
SLC8A1	CALM1	redundant	42.5383
BRIP1	FANCE	ordinary	149.95
GRIK5	PLN	redundant	242.738
PIP4K2A	PACSIN1	ordinary	157.899
PSMD1	PPP2R5E	redundant	72.2735
TRPV4	ITGA1	ordinary	153.87
GRAP2	PRKCQ	ordinary	307.889
POLR1A	HIST4H4	ordinary	78.4879
EPN1	ARRB1	ordinary	85.6344
VAV2	RAC2	ordinary	157.82
NUP58	HSPA4	ordinary	93.4071
EXOSC10	RPS2	redundant	15.5081
PPP1R12A	MYH9	ordinary	60.6007
STIM1	ATP2C2	ordinary	63.3534
ATF4	HSPA5	ordinary	87.3346
TRPV4	STXBP1	ordinary	105.439
NUP43	DIAPH2	redundant	161.254
ASB7	UBE2F	ordinary	53.1418
PIP5K1B	PIK3AP1	redundant	25.3914
ATP1A4	KCND2	ordinary	16.4368
SNX9	LDLRAP1	ordinary	33.0753
MYO18A	CYFIP1	ordinary	37.9879
LCK	CDC42	redundant	30.4363
PDGFA	PDGFRB	ordinary	146.533
CCNA2	ORC2	ordinary	211.398
VEGFA	FYN	redundant	89.3397
TRPC6	VDAC1	redundant	135.585
PDGFRA	PLCG1	ordinary	101.208
H2AFX	HIST1H3H	ordinary	276.65
COPS6	SOCS3	ordinary	207.709
DCTN1	HSP90AB1	ordinary	49.5413
KITLG	SYK	ordinary	21.7771
NRG1	FCGR3A	redundant	145.668
PIK3CG	ITK	redundant	303.898
HIBCH	ACSM1	ordinary	87.4723
AK9	ADCY4	ordinary	214.977
TFDP2	CDC6	redundant	220.612
PIK3CB	REPS1	ordinary	27.7748
CTSV	HLA-DQA1	redundant	39.913
PDGFA	FGFR4	redundant	147.91
CBL	EPS15	redundant	308.689
FBP1	PFKFB2	ordinary	56.1242
SLC4A7	RUNX1	redundant	52.2029
ATP1A1	ABCC9	ordinary	324.597
PIK3R2	LCP2	redundant	101.656
GATAD2A	HIST3H2BB	ordinary	152.798
CLTB	ACTR3	ordinary	55.8473
PSMC4	ANAPC15	ordinary	135.015
HIST1H2BD	NCAPD3	ordinary	170.072
RYR3	MYH3	ordinary	367.523
ASNA1	SEC61A1	ordinary	166.128
CACNB1	DMD	ordinary	395.687
ATP1A1	GNG5	ordinary	57.5281
EXOSC5	WDR46	ordinary	248.318
EME1	EXO1	ordinary	423.784
ASXL1	HIST3H2A	ordinary	84.8522
FGD1	RHOA	ordinary	49.7243
DNA2	UBA52	redundant	126.096
DOCK7	RAC1	ordinary	23.5986
CPT1A	ACSS2	ordinary	388.623
ARHGAP42	RHOF	ordinary	113.632
RPS24	RCL1	ordinary	17.9735
ASIC1	SLC9A6	ordinary	36.3299
ELL	XAB2	ordinary	59.0495
GALNT18	MUC20	ordinary	21.7191
ITPR2	PLA2G4A	redundant	65.1247
RBBP4	MEAF6	ordinary	146.357
ARPC5	WNT5A	ordinary	56.0156
PSMD10	TNFSF14	ordinary	54.1644
FGF2	TEC	ordinary	238.448
SLC3A2	GRIN1	redundant	74.6485
RAC2	RHOB	ordinary	36.3302
NUP107	GEMIN4	ordinary	37.7402
PSME1	CKS1B	ordinary	101.269
INPPL1	SLC2A8	redundant	53.61
SUPT5H	NELFE	redundant	100.495
SLC22A5	SLC4A4	ordinary	37.4512
COPS2	KEAP1	redundant	58.8231
GABPB1	GABPA	ordinary	69.7296
AKT3	MDM2	redundant	51.3806
UBA6	UBC	ordinary	21.7547
CACNB2	ACTA2	ordinary	157.832
CCND1	E2F5	ordinary	103.905
ABL1	WASF3	redundant	271.427
ITPR1	ITGB5	ordinary	41.4961
SRI	TLN1	ordinary	184.77
PHF21A	HIST4H4	ordinary	67.1195
ARHGAP11B	RHOV	ordinary	105.392
GRB2	WASF3	redundant	297.836
SLC34A2	CAMK2G	ordinary	25.639
SH3GL1	INPP4A	ordinary	79.0204
GBF1	COPB2	ordinary	177.415
GPSM3	BDKRB2	ordinary	39.9412
ESPL1	NUP43	ordinary	240.229
ACAT2	HMGCS1	ordinary	139.842
PIK3R6	PLCG1	redundant	44.6912
PRKACB	GLI2	redundant	27.2231
PIK3CB	EPS15	redundant	165.198
ANAPC2	IL6	ordinary	164.837
PIK3C2G	FZD4	redundant	700.512
ARHGAP30	RHOV	ordinary	16.1525
BARD1	MAD2L2	ordinary	145.55
SUPT4H1	TAF6	ordinary	68.4274
CLOCK	PER2	redundant	194.444
CD3G	FGFR1OP2	ordinary	73.4015
ARHGEF3	RHOQ	ordinary	349.837
CSK	CD4	redundant	224.713
EIF5	RPS26	ordinary	23.7647
USP2	RNF31	ordinary	84.4966
ATP2B4	DYSF	ordinary	140.488
ANO1	SLC6A12	ordinary	33.1927
PIK3R2	AP2B1	ordinary	115.794
ATP1A1	KCNQ3	ordinary	35.7096
CATSPER2	GNAI2	redundant	22.4947
NSMCE1	SUMO1	ordinary	74.8821
NUP155	HNRNPC	ordinary	151.127
CACNA2D1	RASGRF2	ordinary	388.64
GNAI2	CACNB3	redundant	121.719
PIK3CA	SNX9	ordinary	66.2159
SRC	KIAA1549	ordinary	77.6634
CDK1	MAD2L1	ordinary	637.165
CA2	PAICS	redundant	104.496
CD79B	CALM3	redundant	31.0102
PI4K2B	AGTR1	redundant	30.2358
PIK3R3	AP2A1	ordinary	80.1462
FYN	FGF10	redundant	71.7332
PTPN3	SH3GL1	ordinary	75.6069
DAB2	EGFR	ordinary	115.096
APP	STX1A	ordinary	102.84
ITGA2	PTK2	ordinary	43.1319
MED13	ADIPOQ	ordinary	359.566
WNT5A	PIP5K1A	ordinary	63.4823
NUP85	AURKB	ordinary	338.268
MAT2A	PRMT3	ordinary	72.6121
TOP3A	LIG3	ordinary	106.909
CHML	RAB3A	redundant	132.694
SLC22A4	ATP1A3	ordinary	80.6569
POLR2H	ERCC6	ordinary	127.723
CARM1	HMGCR	redundant	55.7523
AGPAT3	PLA2G4A	redundant	73.2911
GRIK5	SLC24A2	ordinary	210.335
GPS2	HIST1H2BD	ordinary	137.603
NEURL1	UBB	ordinary	74.7431
STAT3	MMP3	ordinary	57.5833
HAGH	GSTM1	ordinary	32.9212
SLC7A11	SLC1A3	redundant	172.605
PPARA	ACSL1	redundant	596.916
SLC3A2	CAMK2G	redundant	58.4253
PPP2CB	ARAF	ordinary	48.488
PDGFA	KL	redundant	395.171
BARD1	CHEK1	redundant	263.975
TSC2	MLST8	ordinary	223.166
SLC12A2	KCNK1	ordinary	55.989
ARHGEF1	RHOA	ordinary	26.4735
TRPM7	UNC13B	ordinary	31.8528
IRAK1	FYN	redundant	117.989
FANCA	FANCM	ordinary	118.697
CACNG4	SLC24A1	ordinary	67.9491
PPA1	PYGB	ordinary	16.8994
CLTA	ARPC1B	redundant	173.018
TBP	TP53	ordinary	37.0055
SYK	ITK	redundant	176.833
POLD4	RPA3	ordinary	155.138
RANBP2	DDX20	ordinary	112.956
PLCD1	SYNJ1	ordinary	31.8376
CACNG4	SRI	ordinary	65.154
RRP8	H2AFJ	ordinary	42.7348
EP300	ANGPTL4	redundant	114.707
COPS3	CUL4A	redundant	24.3658
RRAGB	SLC7A6	ordinary	24.1
PSMC2	KLHL12	ordinary	96.9642
FGFR4	RAC1	ordinary	39.5968
PIK3R6	BRK1	redundant	30.502
XIAP	TLE1	ordinary	23.8195
COPS7B	FBXL7	ordinary	38.7508
ARID4A	HIST1H2BD	ordinary	203.602
SLC37A1	G6PC3	ordinary	160.288
RNF40	UBE2A	ordinary	91.5488
COPS7A	DCUN1D1	ordinary	32.5001
PDE1C	AK2	ordinary	253.532
XRN1	LSM5	ordinary	54.4575
AP2S1	VAMP2	ordinary	170.394
TALDO1	PFKFB2	ordinary	30.8446
ATP1A1	SLC22A15	ordinary	100.758
PSMD7	FZR1	redundant	40.0625
PSMB9	CUL3	ordinary	46.9164
GNG2	ITPR1	ordinary	370.449
PTPN11	KL	redundant	344.342
C1D	RRP7A	ordinary	17.1284
NCL	NOC4L	ordinary	76.5877
ERAP2	HLA-G	ordinary	31.1111
TACO1	CYCS	ordinary	90.1166
UIMC1	BARD1	ordinary	115.779
FGFR1OP	CD3G	ordinary	29.2
PIP4K2C	RAP1A	redundant	109.514
PDZD11	ATP1B3	redundant	87.2744
RYR3	SLC24A1	ordinary	210.888
INHBB	ACVR1C	ordinary	inf
MED19	CD36	ordinary	504.812
EXOSC4	UTP14C	ordinary	137.818
JAK2	STAT5A	redundant	251.874
MMP7	LAMA3	ordinary	96.5784
WDR5	HIST1H3D	ordinary	150.761
GTF2F1	MDC1	ordinary	30.2369
STON1	PIP5K1C	ordinary	124.769
SPTBN5	COPA	ordinary	95.7881
CCND2	E2F5	ordinary	122.691
ARHGAP35	RASA1	ordinary	68.7775
SLC4A2	ANO1	ordinary	84.4104
ATP1A4	GRIA3	redundant	16.4106
ATG7	MAP2K2	ordinary	54.8129
ARRB2	TGOLN2	ordinary	54.2915
CHD9	TRIB3	ordinary	215.503
CAMK2G	NEB	ordinary	inf
STON2	PTPN13	ordinary	17.5081
SLC25A16	DLST	ordinary	157.329
PDPN	DGKG	ordinary	31.9392
CEP250	AURKA	ordinary	293.304
DVL3	EZR	ordinary	190.958
TLR4	MAP3K7	ordinary	166.032
ASB13	UBE2F	ordinary	105.294
RYR3	MYL12A	redundant	201.471
CD4	PLEKHA2	ordinary	51.3647
CBL	AGTR1	redundant	37.1867
ARL2BP	ATP6V1A	ordinary	113.796
CALM1	ATP1A1	redundant	32.4128
CLIC2	ACTA2	ordinary	282.469
BAG4	INPP5D	redundant	28.8509
DYNC1LI1	HLA-DRB5	ordinary	45.6397
CPSF6	PLCG2	ordinary	57.5155
PLCG2	RAC1	ordinary	39.5866
CEP78	AJUBA	ordinary	22.1714
CD3D	PIP5K1B	ordinary	38.2665
B4GALT7	SDC3	ordinary	71.625
BLM	EP300	redundant	129.793
EGFR	CD28	redundant	31.7238
MAP3K11	NRAS	ordinary	24.0652
SPCS2	RPL12	ordinary	41.377
ABCA2	LCAT	ordinary	61.7275
SPTBN1	YKT6	ordinary	686.685
SLC4A3	ANO7	ordinary	40.5618
HSP90AA1	AURKA	redundant	275.521
KLB	FGF10	ordinary	inf
PSME1	OAZ2	ordinary	51.8524
PLD1	PITPNM2	ordinary	80.7019
TRPC4AP	CACNB3	redundant	126.76
SYDE2	RHOH	ordinary	35.9504
NUP214	SNRPF	ordinary	69.1669
PIP4K2A	CLTC	ordinary	44.5429
PIP5K1A	GNG12	ordinary	126.969
PDZD11	FXYD6	redundant	129.152
SLC8B1	MICU3	ordinary	293.132
MED12	PLIN1	ordinary	568.144
TRPC4AP	GNAI2	redundant	14.7225
GRB2	RAC1	redundant	66.4367
SH3GL1	VAMP3	ordinary	261.535
RMI2	POLR2J	ordinary	268.437
DYNLL1	RAB8A	ordinary	202.894
CLTCL1	VAMP3	ordinary	279.075
PLBD1	PLA2G4A	redundant	57.3347
PSMF1	TNFRSF12A	ordinary	47.0672
GUK1	ATP6V1G1	ordinary	130.571
ITSN2	ARPC1A	ordinary	53.207
SLC20A1	SLC9A8	ordinary	180.08
NUP43	KPNA2	ordinary	188.553
P2RX4	SLC24A2	ordinary	243.309
GSK3B	POLR2H	ordinary	151.731
PIP5K1C	SH3KBP1	redundant	68.5417
CCZ1B	GDI2	ordinary	100.775
NME4	NADK2	ordinary	60.3591
NBN	NEIL2	ordinary	21.0459
SLC8B1	MCOLN3	ordinary	14.4297
PDGFA	FGF2	redundant	335.859
FXYD6	CAMK2D	redundant	67.0077
INPP5K	PIK3CD	redundant	89.1125
IRAK4	WASF2	redundant	120.331
SH3KBP1	CALM1	redundant	77.7466
CACNB2	GRIK5	ordinary	39.2508
ARHGAP12	RHOT2	ordinary	87.0079
ORMDL3	ACLY	ordinary	24.142
AK8	WDR35	ordinary	71.5645
PSMD14	NUMB	ordinary	126.73
TFPT	COPS7B	ordinary	80.1148
P2RX1	GRIN2D	redundant	87.6639
CHM	RAB3C	ordinary	60.344
POLE2	BRIP1	ordinary	310.324
CALM2	PDE4D	ordinary	42.3286
NRG1	BCR	redundant	98.5167
RAMP3	GNAS	ordinary	27.3726
RUVBL1	HIST1H2BN	ordinary	178.278
PLD4	OCRL	redundant	36.6002
DDB1	UBE2M	ordinary	85.8785
SLC22A5	ATP1B3	ordinary	54.8361
PSMD1	UBC	redundant	45.7774
NAGS	PDHA1	ordinary	36.2211
TGS1	HMGCS1	redundant	27.337
CTSA	GLB1	ordinary	135.794
UBXN7	UBE2D2	ordinary	53.1677
CACNB3	SORBS3	ordinary	140.076
SLC9A1	GRIN1	ordinary	51.305
HLA-DPA1	ZAP70	ordinary	196.84
ASIC1	ATP1A1	ordinary	16.0652
APBA1	SYN2	ordinary	330.368
ARHGEF18	RAC1	ordinary	39.8068
SETD3	HIST1H3E	ordinary	74.4487
PLA2G6	CAPZA1	ordinary	115.747
ACSS2	GNPNAT1	ordinary	437.104
GNB5	WASF2	ordinary	138.226
PSMA4	PPP2R5E	redundant	67.7498
RNF111	GTF2H5	ordinary	41.3679
DLG4	CACNA2D2	redundant	83.4205
ARHGEF16	RHOB	ordinary	89.8653
SYNJ2	EPS15	redundant	92.5044
TGFBR1	SMAD3	ordinary	19.7892
ANO8	SLC6A12	ordinary	22.0142
CACNB3	MYL6B	ordinary	136.992
PIK3CA	NECAP2	ordinary	40.8551
PIAS1	SP3	ordinary	220.449
PLA2G4A	AGPAT3	ordinary	73.2911
CHST8	IMPAD1	ordinary	32.3088
ATP1B3	KCNJ15	ordinary	20.1196
GBE1	GYG2	ordinary	inf
ARHGEF15	RHOG	ordinary	310.949
CACNB1	PYGL	redundant	74.2818
PI4K2B	CD3D	redundant	48.4034
NECAP1	INPP4B	ordinary	24.0732
CACNB3	SLC24A3	ordinary	126.248
CTSS	TLR7	redundant	131.928
HADHA	NAT8L	redundant	431.709
GNG5	CACNA2D2	ordinary	99.1064
CALM3	TRPV4	ordinary	26.1689
ARHGEF6	RHOH	ordinary	153.934
PLCD1	DAGLA	ordinary	32.8616
HIST1H4H	H3F3B	ordinary	81.5454
SRC	FGF1	redundant	318.443
PSMD8	BUB1B	ordinary	249.68
TRPC6	SRI	ordinary	89.6975
NUP93	NXF1	ordinary	33.8189
F5	SEC24A	redundant	30.3445
CDC42	PPP2R5D	redundant	27.6961
CUX1	LCP2	ordinary	29.5881
AKR1B1	SORD	ordinary	99.3969
HMGCR	MORC2	redundant	59.4264
NUP153	GEMIN6	ordinary	58.4183
SEC11C	RPS7	ordinary	40.4709
GPD1L	GPAT4	ordinary	54.3462
TPCN1	STXBP1	ordinary	150.703
RAI1	CLOCK	ordinary	45.6119
MAPK11	HIST1H3D	redundant	121.156
ATP1A1	SLC5A6	ordinary	15.1626
ERCC2	POLR2L	ordinary	114.25
GLCE	GPC6	ordinary	15.6081
PSMD9	ANAPC7	ordinary	162.082
ATP6V1D	DTYMK	ordinary	117.609
TRPM7	SRI	ordinary	20.8664
CALM1	RASGRP4	redundant	77.3613
PRDX6	GSR	ordinary	81.3266
CBL	WNT5A	redundant	47.6375
CPSF6	KL	ordinary	304.438
GNPAT	ACLY	ordinary	65.3453
GNB2	NCKAP1L	ordinary	79.5803
ARPC2	FZD4	ordinary	592.186
SLC9A2	DLG4	ordinary	21.6459
ADRB2	MYO10	ordinary	401.661
CAD	VAMP2	redundant	130.501
PSMB4	RELA	redundant	114.386
PIK3R5	FGF1	redundant	263.681
CAMK2D	ATP1A1	redundant	31.5117
TRPM7	RASGRF2	ordinary	175.05
PSMC3	CDC16	ordinary	32.0515
DNAJB6	HSPA12B	ordinary	125.719
CPLX1	RAB3A	ordinary	196.001
DIAPH2	DSN1	ordinary	230.94
STON1	SYT1	ordinary	155.202
PSMD10	NUMB	ordinary	82.0905
GCLM	GGCT	ordinary	112.742
PSMC5	SPOP	ordinary	38.5947
ATM	GTF2H3	ordinary	69.7236
BRAF	MPRIP	ordinary	228.69
RFC4	PALB2	ordinary	148.428
ADCY9	PRKAR2B	ordinary	324.58
SOS1	VAV1	redundant	91.7089
CERS6	ATAT1	ordinary	75.1844
ARFGAP1	KDELR2	ordinary	162.399
UBE2V1	NOD2	redundant	70.4574
HIST2H2BE	NCAPG2	ordinary	165.819
CBLB	PRKCQ	redundant	53.0004
POLR2C	NELFE	ordinary	36.5259
GNG12	AKT2	ordinary	74.2227
PSME4	CUL5	redundant	93.5081
PIK3CA	TRIP10	ordinary	78.6703
NCL	NOL6	ordinary	63.9468
SLC24A3	MCOLN2	ordinary	58.0251
CAMK2B	GNAI1	redundant	391.957
ARHGAP19	RAC2	ordinary	197.721
NUP107	HSPA5	ordinary	91.9632
CALM3	ATP2C2	ordinary	62.7337
PSMB6	CCNE2	redundant	146.008
AKAP9	RIMS1	ordinary	41.1172
P2RX4	CLCA2	ordinary	72.0099
EXOSC2	GMPR	redundant	17.2392
NIP7	NOL6	ordinary	41.5982
PPAT	SLC3A2	redundant	107.668
SUCLG1	DLD	ordinary	169.803
NUP54	GEMIN4	ordinary	59.0806
RHNO1	RPA2	ordinary	131.264
MND1	RPA1	ordinary	152.206
SLC22A4	SLC9A6	ordinary	44.9391
CTSA	HLA-DPB1	ordinary	52.6734
DPAGT1	ALG14	ordinary	42.2768
L2HGDH	AADAT	ordinary	14.7172
GRB2	FGF1	redundant	320.622
ARHGAP11B	CDC42	ordinary	107.25
AGO2	NOTCH2	ordinary	39.6898
RPS26	UPF1	ordinary	25.4271
ARHGEF18	RHOBTB2	ordinary	41.5341
POLD4	TOP3A	ordinary	69.8063
SRSF10	HNRNPA0	ordinary	21.1487
CACNB3	TMOD1	ordinary	354.316
CACNB3	ATP2A3	ordinary	171.831
PI4K2B	VAMP3	redundant	238.54
PMPCA	HSPA9	ordinary	69.8614
AKAP1	DMD	ordinary	389.496
SBF2	PPP2R5A	redundant	88.6816
GRIN1	TMOD2	ordinary	109.481
FGF1	CYFIP1	ordinary	272.509
GGT7	CALM1	redundant	34.5895
CACNG4	RASGRF1	ordinary	82.2229
FGFR1OP2	FCGR3A	ordinary	97.9316
TREM2	CUX1	ordinary	40.3132
CACNA1F	MYL5	ordinary	117.266
NRAS	VCL	ordinary	75.6695
DNAJC6	AP1S1	ordinary	161.153
CTH	ORMDL1	ordinary	15.1835
ADCY6	PDE11A	ordinary	258.783
PDZD11	SLC4A5	redundant	81.4829
ACSL5	ZDHHC2	ordinary	95.5068
ALG10	STT3A	ordinary	49.8663
ATP1B2	SLC38A3	ordinary	97.6396
TBL1XR1	GLIPR1	ordinary	42.869
CAMK2D	RIMS1	ordinary	39.5783
RAPGEF4	ABCC8	ordinary	33.7503
CSF2RA	AKT1	ordinary	68.036
EGF	ERBB4	redundant	44.6086
RACGAP1	RHOA	ordinary	169.913
PSMC5	GSK3B	redundant	44.8349
AP2B1	SYT1	ordinary	74.8288
GNA11	DAGLB	ordinary	114.373
SLC24A3	ATP2B4	ordinary	116.909
SAP30	H3F3B	ordinary	70.926
KAT2A	TBP	ordinary	45.9869
TRPV6	SORBS3	ordinary	24.0146
CCND3	E2F3	ordinary	66.1345
FGF2	CD247	ordinary	217.304
IRS2	GRAP2	ordinary	87.5117
CAMK2B	TMOD1	ordinary	233.096
POLE3	WRN	ordinary	70.4127
INPP5D	NECAP2	ordinary	173.88
HLA-E	VAV3	ordinary	119.065
CDK4	E2F2	ordinary	171.057
CD3G	BTK	ordinary	372.864
ERBB2	TRIM24	ordinary	77.576
SUZ12	H2AFV	ordinary	37.0941
MSL1	HIST1H4I	ordinary	127.229
ARHGAP44	RHOA	ordinary	31.7115
SLC1A5	CTPS1	ordinary	101.095
TACR1	PLEKHA2	ordinary	177.97
RABGGTB	RAB13	redundant	79.3973
CACNB3	VDAC1	redundant	167.781
LYN	LCP2	redundant	228.332
CACNB3	CACNA1F	ordinary	128.014
CHN2	RHOQ	ordinary	357.218
PDGFRB	WASF1	ordinary	13.3562
APP	PPP3CA	ordinary	20.8921
GALNT2	MUC6	ordinary	39.106
NCOA2	HMGCR	redundant	32.1027
JAK2	MAPK3	redundant	48.2599
ESPL1	CENPP	ordinary	261.541
PSMD5	TNFRSF12A	ordinary	51.3378
RNF4	UIMC1	ordinary	70.5514
GNAI1	NCALD	ordinary	455.026
DVL1	ICOS	ordinary	56.4693
SEC11C	RPL12	ordinary	37.7283
CYLD	TAB2	ordinary	66.7297
CRTAP	COL13A1	ordinary	300.433
PIP5K1B	BTK	redundant	27.9664
ATP1A1	HCN3	ordinary	54.8879
FAR2	ACAA1	ordinary	22.9782
MTMR3	PPP2R5D	redundant	84.4387
ATP6V0E2	ABCC4	ordinary	56.0199
COPS7A	ASB16	ordinary	38.6814
PSMB9	ANAPC7	ordinary	100.578
KIFAP3	ACTR1A	ordinary	37.6395
HIST1H2BD	HIST4H4	ordinary	223.745
PIK3CD	CYFIP2	redundant	55.3412
PIP5K1A	REPS2	ordinary	101.279
CACNA1D	CD209	ordinary	271.931
PSME3	AJUBA	redundant	33.1381
DAB2	ARPC3	ordinary	165.02
EZH2	H3F3B	ordinary	196.625
DDAH1	ASS1	ordinary	41.1069
DVL2	NCK1	redundant	28.2022
FGFR1	CD80	ordinary	118.015
CAMK2G	MDM2	redundant	27.3771
BTC	FYN	redundant	72.5886
FXYD6	SLC1A2	redundant	77.1921
FAM20C	IL6	redundant	168.95
PIP5K1C	PDGFRB	redundant	48.0769
TPR	HSPA4L	ordinary	35.8054
RAP1GAP	RAP1A	ordinary	61.2037
GNA14	DGKI	ordinary	49.6429
PIK3C2G	VAMP7	redundant	127.394
GNG2	FGF18	ordinary	357.384
USP2	TNF	redundant	91.3751
FGFR4	FCGR2A	ordinary	41.6379
HSPA8	SNX9	ordinary	44.2845
STIM1	ANXA1	ordinary	361.723
ARHGAP17	RHOF	ordinary	113.719
ADAM9	COL17A1	ordinary	146.851
ALS2	GDI2	ordinary	34.601
HLA-E	CNTRL	ordinary	68.5051
GNB4	NCKAP1	ordinary	53.8231
LAMTOR1	AIMP1	ordinary	20.3871
PRKAB2	RRAGD	ordinary	91.0459
DCAF6	CUL4B	ordinary	23.5018
NDC1	SNUPN	ordinary	46.0819
CTTN	SYT9	ordinary	61.9939
HIST1H2BK	KDM4A	ordinary	120.61
FXYD6	KCNF1	ordinary	85.9872
AK8	ATP6V1D	ordinary	85.0547
UBE2D1	SMAD3	ordinary	24.6641
NFYC	GGPS1	redundant	87.8312
CHMP6	UBB	ordinary	42.5093
CAMK2B	ATP1A2	redundant	401.168
PSMC4	RELA	redundant	119.233
PPP1R1B	PDE4B	critical	19.4114
RBBP7	HIST1H2BH	ordinary	161.323
SLC4A8	BEST1	ordinary	93.2754
SEH1L	SNRPD3	ordinary	88.1467
PIK3CA	FCHO1	ordinary	56.1075
AAAS	RAN	redundant	87.3611
POLR2J	NELFE	ordinary	273.606
NAA35	ATAT1	ordinary	33.592
DVL1	PPP2R5E	redundant	65.6083
TRPV6	DLG4	redundant	20.0158
FGFR4	CYFIP2	ordinary	88.2076
AKAP1	NFATC1	redundant	38.435
PIP5K1C	FYN	redundant	82.9217
RRAGB	IARS	ordinary	43.8432
PTPN11	BAG4	redundant	100.652
ATP6V1C1	PYGL	ordinary	88.0311
TFDP1	SUZ12	ordinary	54.5232
AP2A1	ROR2	ordinary	61.992
SLC38A5	SLC4A7	ordinary	69.7492
AGBL3	VAMP2	redundant	104.92
TGOLN2	PIP5K1B	ordinary	38.7065
EXOSC8	DDX49	ordinary	67.0376
NME1	ATP6V1A	ordinary	151.093
AK8	ATP6V0B	ordinary	200.477
EXO1	POLK	ordinary	248.165
TRIO	RHOQ	ordinary	355.947
EPS15L1	ARPC5	ordinary	117.044
PIP5K1C	CBLB	redundant	30.137
MPC2	PDHA1	ordinary	43.7101
KAT5	CHEK1	redundant	101.249
CD80	VAV1	ordinary	240.399
PIP5K1A	NTN1	ordinary	62.1192
CHM	RAB1B	redundant	48.39
EPHB1	EFNB2	ordinary	161.597
DNA2	FEN1	ordinary	366.068
PEBP1	TRIM24	redundant	33.2967
ESPL1	WAPL	ordinary	197.017
SPRED3	HRAS	redundant	89.9219
CHCHD4	CMC2	ordinary	126.13
SUV39H1	HIST1H2BN	ordinary	118.006
POLR2D	MDC1	ordinary	82.59
ARHGAP25	RHOT1	ordinary	19.0773
AAK1	SLC2A8	ordinary	44.7141
CLTB	TACR1	ordinary	180.972
INPP5D	GRB2	redundant	69.5274
EFNA3	RHOA	ordinary	79.3798
PIK3C2B	EPS15	redundant	97.5541
ST3GAL6	SLC35A1	ordinary	29.6461
PSMC1	BUB3	ordinary	109.105
TRPC4AP	MYH11	ordinary	334.913
SLC8A1	ATP1A2	redundant	414.437
CACNA1C	CPLX1	ordinary	52.371
ACTR2	IGF2R	ordinary	158.453
PSMC3IP	HIST1H4I	ordinary	155.045
ACOT2	ACAT1	ordinary	109.71
PSMA3	PPP2R5E	redundant	109.154
EIF5	EIF4E	redundant	115.674
CACNA1D	ACTA2	ordinary	184.612
ARPC1A	TFRC	ordinary	68.1549
SLC38A2	ASNS	redundant	54.6002
EXOSC2	UTP3	ordinary	37.9518
ARPC1A	IGF2R	ordinary	30.6902
FXYD3	SCN4A	ordinary	496.964
DENND1B	RAB35	ordinary	56.4991
PSMA7	WTIP	ordinary	86.868
WRN	PARP1	redundant	193.81
PPP1CB	PER1	redundant	253.601
STAT4	TALDO1	redundant	24.5985
NUP107	PHAX	ordinary	30.0699
PSMB9	NUMB	ordinary	59.4838
CCNB2	PPP2R5B	redundant	197.775
GRIN1	LMOD1	ordinary	433.093
PSMB6	RPS27A	redundant	131.639
C1QC	C2	ordinary	192.574
SLC23A2	SLC4A5	ordinary	73.9841
CATSPERG	MYL5	ordinary	61.7247
NDC1	HDAC4	ordinary	131.688
SUV39H1	HIST1H2BJ	ordinary	158.166
ARHGAP18	CDC42	ordinary	22.8737
IRS1	FGF2	ordinary	232.067
2020-09-02	HAUS7	ordinary	102.193
PKM	ATP6V1G2	ordinary	92.429
ASIC3	FXYD3	ordinary	114.795
PSMA6	NPEPPS	ordinary	68.9448
LGMN	HLA-DRB1	redundant	147.509
SPCS1	SSR1	ordinary	62.5409
PIP5K1B	CD86	redundant	46.0638
HDAC2	H2AFJ	ordinary	74.8798
PSMC1	NFKB2	redundant	40.4534
FXYD6	SRI	ordinary	51.3321
GABPA	POLG2	ordinary	74.4333
PSME2	GLI3	redundant	123.688
CATSPERB	VCL	ordinary	71.7406
ACSS2	HMGCS1	redundant	400.936
CD79B	DAPP1	ordinary	70.3263
GSS	GSTM3	ordinary	49.0643
KIF15	HLA-DPB1	ordinary	176.333
PSMD3	RELA	redundant	55.9778
LIAS	MARS2	critical	78.5981
SKP1	AURKA	redundant	230.52
MAPK1	L1CAM	redundant	16.2306
ARHGEF39	RHOA	ordinary	120.109
FGF2	LCK	ordinary	229.64
FGFR1	INPP5K	ordinary	92.4539
CAMK2D	NFATC3	redundant	67.2431
ZMYM2	BAIAP2	ordinary	60.1263
RRAGA	AIMP1	ordinary	18.1511
SRI	LMOD1	ordinary	420.839
BLM	FAAP24	ordinary	259.933
PIK3R5	SH3KBP1	redundant	183.011
RAB3GAP1	BICD2	ordinary	50.4435
MMP3	COL9A3	ordinary	92.3872
CRTAP	COL1A2	ordinary	428.348
ORAI1	PPFIA1	ordinary	34.8655
PPAT	GCLM	ordinary	114.31
ARHGEF4	RHOA	ordinary	81.6641
ARFGAP1	RAB1A	redundant	117.428
SRM	SAT1	redundant	34.5709
PYGO1	H2AFZ	ordinary	198.444
CCNB2	CENPL	ordinary	514.233
LAMA2	HGF	ordinary	375.615
PSMB3	CDC27	ordinary	63.7967
XRCC1	UBC	redundant	42.3757
PIP4K2C	PDGFRB	redundant	81.829
P2RX7	GRIN1	redundant	26.9336
ATP2B1	TLN1	ordinary	221.754
GGT6	NCALD	ordinary	62.7225
STX1A	CACNA1F	ordinary	96.9278
ACLY	FASN	ordinary	52.5568
DHCR24	SCAP	ordinary	49.1334
CUX1	RHOA	ordinary	22.7361
TNFAIP3	RNF31	ordinary	22.4654
ASPH	ANXA6	ordinary	84.5895
KITLG	FGF7	ordinary	125.758
NBN	FANCD2	redundant	183.412
MTMR3	PITPNM3	ordinary	84.6023
TRAF6	NCKAP1	redundant	135.907
SPCS1	SEC61B	ordinary	86.1276
PSME4	TRAF2	redundant	139.642
EED	H3F3A	ordinary	123.269
USP1	FANCM	redundant	43.5686
IDH3G	AADAT	ordinary	28.2067
BRCA1	UBE2I	redundant	104.552
GSK3B	TAF1A	redundant	84.9205
LCK	PDCD1	redundant	inf
CACNG4	NFATC3	redundant	98.6933
FAM13B	RHOB	ordinary	75.1081
TRAPPC13	RAB1B	ordinary	38.4969
CACNG4	TMOD2	ordinary	141.187
AGPAT3	PLA2G6	redundant	26.8432
CAPN1	CDH1	ordinary	59.7303
ICOS	FGFR1OP	ordinary	63.286
CCDC22	UBE2F	ordinary	101.781
POLR2K	HIST1H3D	ordinary	163.419
TRPC1	PXN	redundant	159.621
PIP5K1A	WASF3	redundant	306.563
CASP6	VIM	redundant	238.109
ASPH	SLC24A2	ordinary	247.804
PGM2	SLC37A4	redundant	35.7798
PIK3CA	PACSIN3	ordinary	66.2545
DVL3	LCP2	redundant	69.0863
BOP1	UTP3	ordinary	79.0787
CD80	LCP2	ordinary	424.387
KSR2	MAP2K1	ordinary	23.7022
NBN	RPA3	redundant	88.7616
HADHB	CS	redundant	152.705
PIK3R2	AP2M1	redundant	149.785
BTC	SOS1	redundant	403.256
PSMC3	BIRC3	redundant	30.6942
PLCB2	DGKD	ordinary	29.3781
PRKCE	SHC1	ordinary	31.7746
PSMA5	FBXL7	ordinary	116.706
POLR2K	HIST1H4I	ordinary	198.602
MCRS1	COPS2	ordinary	67.784
ITPR1	RASGRF2	ordinary	169.082
CALM2	NFATC3	redundant	69.3683
PSME3	LTB	ordinary	78.4582
SUMF2	ARSJ	ordinary	20.4473
PSMA3	OAZ1	ordinary	69.4046
EXOSC6	NOP14	ordinary	29.8909
FAM20C	SDC2	redundant	35.777
MOV10	NOTCH4	ordinary	301.551
PAFAH1B1	DYNC1H1	ordinary	124.477
DVL2	LDLRAP1	redundant	34.7084
CPT1A	ACSL6	ordinary	22.8879
RPS11	RRP7A	ordinary	62.5747
CHRNA1	CACNA1C	redundant	17.8832
RAB3A	SLC1A3	ordinary	205.027
SNX18	EGFR	ordinary	101.362
ALG3	ALG9	ordinary	200.081
LEP	STAT3	redundant	508.259
ELOVL7	HSD17B12	ordinary	56.7813
RABGGTB	RAB27B	ordinary	25.5908
MMP15	NID1	ordinary	29.0032
ECT2	RHOV	ordinary	160.885
PCP2	GNG5	ordinary	89.8966
FGFR3	FCGR2A	ordinary	77.7454
AGPAT2	ACSL5	ordinary	224.339
RPS13	TBL3	ordinary	107.8
BARD1	MNAT1	ordinary	112.34
PRKAA2	ULK1	redundant	23.2959
CAMK2G	GNAI1	redundant	420.706
RAD51C	RAD51	ordinary	219.169
AGPAT5	LPIN1	redundant	91.8629
ARRB1	VAMP2	ordinary	148.331
SLC24A2	SLC4A4	redundant	214.033
DNAJB1	HSPA2	ordinary	16.629
TPCN2	ACTG2	ordinary	51.1102
CALM2	P2RX4	ordinary	87.7338
HLA-E	MYO18A	ordinary	60.8539
PIP5K1A	PIK3AP1	redundant	64.557
TOMM5	PINK1	redundant	136.979
RUNX3	TEAD4	ordinary	87.2081
SPTSSB	ACLY	ordinary	48.7012
PTK6	KHDRBS3	ordinary	109.476
PSMD13	SPOPL	ordinary	69.8074
COPS6	ASB6	ordinary	91.1064
ACOT1	AACS	ordinary	34.665
MYO9B	RAC1	ordinary	45.9805
PLCD4	DGAT2	ordinary	384.667
OPLAH	TTLL1	ordinary	43.163
GNAI1	STIM1	ordinary	412.919
SRGAP2	RHOG	ordinary	43.0957
CATSPER2	SLC8B1	redundant	17.4143
ARRB2	CD3G	ordinary	146.742
KCNN3	ATP1A3	ordinary	90.9425
TRPV6	PRKCZ	redundant	50.3352
PPP1CB	CRY1	ordinary	45.9036
GNG2	FGFR3	ordinary	403.1
CALM3	PDE4A	ordinary	27.0402
BRCA1	POLH	ordinary	83.5928
ARHGAP20	RHOV	ordinary	602.22
GAB2	LCK	ordinary	22.5459
RPS27A	INPP4B	redundant	58.1508
DMAP1	HIST3H2A	ordinary	69.2684
ITPR2	PRKCZ	redundant	63.0728
PSMC4	CUL1	redundant	115.063
NEDD8	UBE2M	ordinary	200.604
TNKS2	AXIN1	ordinary	128.332
UBE2N	TLR4	redundant	208.888
AK5	ATP6V0E2	ordinary	161.216
PIP5K1A	PLCE1	ordinary	71.3747
MAP2K2	KDM7A	ordinary	66.5646
MYD88	FGFR4	ordinary	89.0751
DCTN1	NR3C1	ordinary	289.468
COASY	ACSL4	ordinary	229.297
RYR3	PPFIA3	ordinary	255.822
CALM1	INPP5D	redundant	40.4421
VPS4A	PPIA	redundant	80.1137
CLTA	IGF2R	redundant	43.1985
PIK3CA	INPP4B	redundant	42.6337
HGF	TEC	ordinary	98.5374
PRMT5	H2AFX	redundant	151.932
NUP85	GEMIN2	ordinary	140.264
GMPR	ADSSL1	ordinary	69.478
SLC1A3	NICN1	ordinary	145.834
ATP1A1	GNB2	ordinary	66.8779
PSMD3	RBX1	redundant	94.8018
HDAC2	HIST1H2BJ	ordinary	118.636
ARHGEF35	RHOJ	ordinary	219.948
KLC1	HLA-DQB2	ordinary	29.5591
PSMD7	CDC20	ordinary	286.18
RYR3	RASGRF1	ordinary	225.185
CACNA2D1	ATP2C1	ordinary	208.279
PSMC5	PPP2CA	redundant	47.325
CAMK2D	IFNGR2	ordinary	42.5907
EXOSC8	EMG1	ordinary	22.7817
CFB	C5	ordinary	103.757
TRPM7	SYT1	redundant	70.0059
CCNB1	AHCTF1	ordinary	295.252
PRKAG2	LAMTOR1	ordinary	43.9026
COPS7B	KLHL2	ordinary	67.4759
RHOB	MYH11	ordinary	333.004
FOLH1	TTLL7	ordinary	36.6012
ICOS	FGF10	ordinary	47.5734
FGFR3	ITK	ordinary	73.7397
CNDP2	TTLL3	ordinary	72.6102
CYBRD1	CP	redundant	52.5873
CTSC	HLA-DRA	ordinary	194.93
PPP2R1A	MARK3	ordinary	54.3836
HMOX1	BLVRB	ordinary	18.7237
PIK3CA	ACTR3	redundant	87.7117
TRPC6	ATP2A2	ordinary	99.1056
CD79A	ITPR3	redundant	44.8521
ITPR2	MYH11	ordinary	338.371
CAMK2D	ACTG2	ordinary	73.5879
FGF2	INPPL1	ordinary	250.335
PIP4K2C	PIK3C3	ordinary	94.4946
XRCC1	RFC5	ordinary	94.0635
PIP4K2B	TEC	redundant	20.7363
CPSF6	GRAP2	ordinary	28.8157
STON2	ARPC4	ordinary	67.3697
GNAI2	STIM1	ordinary	19.5399
LDLR	CD3G	ordinary	20.4291
GLA	GLB1	ordinary	83.6502
ATP6V0A1	SLC25A10	ordinary	61.436
UBA52	CD3D	redundant	46.3152
ITPR3	CPLX1	ordinary	56.7018
B3GNT8	MUC16	ordinary	18.5773
AK7	GNAL	redundant	280.682
MAP2K4	MAPK8	redundant	25.5918
PIP5K1B	MTMR1	ordinary	32.3458
GNG11	SYNJ1	ordinary	431.71
GCAT	GARS	ordinary	134.619
CACNB2	STX1A	ordinary	104.695
AKT1	RPTOR	ordinary	58.9514
HSP90AA1	BAG4	redundant	30.9372
ENPP1	ACP5	critical	38.5106
HSP90AA1	TDRKH	ordinary	109.579
CATSPERB	TMOD1	ordinary	247.817
SKIV2L2	DIEXF	ordinary	49.8145
TTF1	HIST1H2AE	ordinary	47.1651
COPS4	DCAF16	ordinary	58.2563
BCR	CYFIP2	ordinary	54.7042
UBB	BRCA1	redundant	65.3393
RPS5	RCL1	ordinary	16.9634
NUPL2	CPSF2	ordinary	38.2956
DVL1	FGF2	redundant	225.689
PDGFRA	FGFR1	ordinary	106.82
NUP88	GEMIN7	ordinary	83.5382
ALDH1A2	CRABP1	redundant	280.176
TGS1	SLC27A1	ordinary	102.132
P4HA2	COL5A1	ordinary	208.096
TREM2	PDPK1	ordinary	33.5338
KCNC3	ATP1A2	ordinary	406.705
DVL3	LAT2	redundant	103.157
NADK	SLC25A6	ordinary	30.7466
TRIM24	FGF18	ordinary	43.7587
TRPV4	NFATC1	redundant	53.5331
DVL3	CTNNB1	redundant	83.9591
CATSPERG	RASGRP1	redundant	55.7578
ATP1A3	SLC6A12	redundant	84.7479
LEF1	HIST1H3H	ordinary	225.53
KCNQ3	ATP1B1	ordinary	34.4142
P2RX1	SLC8B1	redundant	34.596
NDC80	STAG2	ordinary	214.62
CDK11A	PAFAH1B1	ordinary	74.9227
SLC1A1	LRRC49	ordinary	58.9337
IGF2R	MYO10	ordinary	99.0246
TCIRG1	SLC25A5	ordinary	92.0929
PPFIA3	VAMP2	ordinary	153.017
GPSM2	CCR5	ordinary	98.9278
BLNK	DGKH	redundant	73.6674
AKT2	PDE3B	ordinary	561.664
MAPK1	SPRY2	redundant	390.023
POLH	XRCC2	ordinary	141.429
VAMP8	ARPC5	redundant	161.423
PSMC1	WTIP	ordinary	57.7264
CNOT6	PAIP1	ordinary	154.457
PTEN	HGS	ordinary	147.804
ORAI2	CACNB3	redundant	239.669
PSMD6	ANAPC11	ordinary	74.9202
EPHA1	EFNA5	ordinary	27.7518
POLR2L	H2AFJ	ordinary	144.059
DVL2	IGF2R	redundant	35.2644
PSMC1	PPP2CA	redundant	41.1015
RBBP5	H2AFV	ordinary	83.6866
EHMT1	HIST1H3D	ordinary	128.889
GTF2H1	NCBP1	ordinary	147.201
COPS7B	FBXL3	ordinary	98.4743
CACNG4	CACNB2	redundant	64.0243
ALS2	RAB5C	ordinary	36.7114
GNA11	INPP5B	ordinary	58.8508
PI4K2A	SYT9	redundant	38.9545
PSMF1	TNFRSF13C	ordinary	22.644
SLC6A1	BEST1	ordinary	83.5725
GNG7	KLB	ordinary	inf
SLC25A13	RARS	redundant	74.0376
CPT1B	MORC2	ordinary	89.4272
RAD50	XAB2	ordinary	16.9809
SUMF2	ARSB	ordinary	31.9266
PIK3C2B	DAB2	redundant	119.358
CNDP2	PPCS	redundant	85.5708
GNB5	ERLIN2	ordinary	36.611
DVL1	EPHB3	ordinary	24.5012
PSMD6	GTSE1	ordinary	226.992
CD79B	PIK3R1	ordinary	142.075
PPP1CA	TGFBR1	redundant	119.131
RTF1	UBE2B	ordinary	48.3201
GNB1	LCK	ordinary	26.4005
EXOSC1	FBL	ordinary	85.3669
ADAMTS3	COL5A3	ordinary	61.8604
LCLAT1	ACLY	ordinary	93.0878
MCOLN3	NFATC3	redundant	51.952
BLM	POLR2E	ordinary	127.981
POFUT2	THSD7B	ordinary	129.507
FGF10	SOS1	ordinary	83.8662
SLC1A3	QARS	redundant	111.668
KIF18A	HLA-DQA2	ordinary	169.425
DYNC1LI1	DIAPH2	ordinary	159.998
SEH1L	HSPA4L	ordinary	85.4586
TCF7L1	HIST1H2BK	ordinary	135.705
PKM	ATP6V0B	ordinary	237.652
PIK3CB	PDPK1	redundant	53.1637
UBQLN2	TACR1	redundant	171.503
FURIN	NOTCH1	redundant	29.8206
GNG4	AKT3	ordinary	81.4009
SLC35B3	CHST7	ordinary	149.087
SRSF10	DHX9	ordinary	281.821
GRIN1	RASGRP1	redundant	65.0748
EGFR	WASF2	redundant	149.15
ARHGAP31	RHOC	ordinary	211.889
RASGRP3	KRAS	ordinary	51.8103
CNKSR1	MAP2K2	ordinary	106.874
SEC11C	RPS17	ordinary	40.5128
STON1	ACTR3	ordinary	213.661
GNB4	RASGRP2	ordinary	15.5432
SEC23A	LMAN2	ordinary	134.902
PLEKHG5	RHOH	ordinary	68.0443
PSMD1	CDC26	ordinary	32.847
BARD1	HMGN1	ordinary	212.45
GPSM2	CXCL8	redundant	96.57
UBC	XRCC3	redundant	24.9047
STAM2	AGTR1	ordinary	21.7019
CD79A	TRPC6	redundant	97.1425
CACFD1	VIM	redundant	295.769
PIP5K1B	BCR	redundant	22.9624
CCNK	CHEK1	ordinary	116.277
PLCB4	DGKG	ordinary	26.8458
MAPK3	ABI2	redundant	22.6432
ABCC9	ATP1B1	ordinary	329.628
NUP214	CPSF2	ordinary	82.6936
TCIRG1	SLC25A10	ordinary	140.217
EP400	HIST1H2AC	redundant	71.0434
DVL1	AP2A2	ordinary	47.5933
EDC3	LSM1	ordinary	65.8739
PSMB10	PPP2CA	redundant	43.3789
PDE1B	GMPR2	ordinary	221.915
COPS2	LMO7	ordinary	45.9348
PIK3C3	MAP1LC3B	ordinary	72.5241
PSME4	LIMD1	ordinary	59.5044
KCNK13	FXYD3	ordinary	69.1941
ACOT2	HADHB	ordinary	103.365
ABCB10	HMOX2	ordinary	110.802
PGK1	GAPDH	ordinary	196.669
RXRA	PDHX	redundant	26.2053
ARHGEF39	RAC2	ordinary	143.387
PSMB5	BUB3	ordinary	158.527
PIP4K2B	HLA-E	ordinary	52.5488
BTK	ITPR1	redundant	44.681
P4HA2	COL4A6	ordinary	71.3288
PSMC3	NFKB2	redundant	106.759
RPS15A	FBL	ordinary	67.608
UAP1	ALG14	ordinary	43.9431
FCGR1A	FGFR4	ordinary	121.929
PKN1	PPP1R14A	critical	221.223
ERAP2	HLA-B	ordinary	48.9074
MTM1	PPP2R5D	ordinary	30.6296
SEC11A	RPL39L	ordinary	72.0061
MED22	FABP4	ordinary	430.83
MYD88	RHOA	ordinary	98.3222
HADHA	ACSF3	redundant	125.146
LCK	CTLA4	ordinary	601.871
CACNA1D	GRIN1	redundant	51.0605
SEC24D	CD59	ordinary	82.4939
PSMD14	REL	ordinary	103.363
TOP3A	NBN	redundant	43.5344
ACTR3	VAMP3	ordinary	261.495
FIG4	RUFY1	redundant	21.6061
APP	RASGRP1	redundant	51.7181
KIF18A	ACTR1A	ordinary	159.809
DEPDC1B	RHOU	ordinary	285.495
PSMA4	SPOPL	ordinary	83.4727
PTEN	VAV3	redundant	132.698
CAMK2G	ITGA1	ordinary	173.347
SOS1	PAK2	redundant	143.089
PRMT5	WDR77	ordinary	41.4836
PCP2	S1PR1	ordinary	311.157
SOCS5	NEDD8	ordinary	180.933
FYN	JAK2	redundant	110.004
EHMT2	HIST1H3D	ordinary	173.148
SH3KBP1	SYT9	redundant	91.6648
POLD4	BARD1	ordinary	159.209
SPCS1	RPS18	ordinary	47.7301
ATP2B4	NEB	ordinary	inf
RPS3A	TBL3	ordinary	111.451
ACSL6	ELOVL7	ordinary	58.5799
ACTR3	SYT8	ordinary	46.8908
PSMD2	CD40LG	ordinary	51.3599
PRMT6	H3F3A	ordinary	126.597
ATP2B1	PRKCZ	redundant	81.7107
GPSM2	CCR1	ordinary	81.7198
P2RX4	RASGRF2	ordinary	193.703
B3GLCT	SPON1	ordinary	27.2947
MTA3	HIST3H2BB	ordinary	149.214
DBF4	MCM5	ordinary	206.185
LRP6	PPP2R5C	redundant	37.3103
PSME3	CDC20	ordinary	216.248
CD80	RHOA	ordinary	101.459
ATAT1	GNPNAT1	ordinary	78.2553
LCK	STAT5A	redundant	264.484
POLR1D	H3F3A	ordinary	111.074
MED15	FABP4	ordinary	429.327
RPS28	PWP2	ordinary	21.9813
ACSL3	ELOVL1	ordinary	18.8674
ARHGAP26	CDC42	ordinary	87.1785
PIP5K1C	SH3GL1	ordinary	228.077
STX1A	SLC1A2	redundant	127.658
MAPKAP1	AKT3	ordinary	40.429
CDKN2A	RUNX3	ordinary	146.365
KL	CUX1	ordinary	286.524
DNAJB6	HSPA2	ordinary	17.4524
PSMC2	LNPEP	ordinary	82.606
CDC42	CENPA	ordinary	182.037
RRAGC	SLC7A6	ordinary	64.491
ATAT1	NAA30	ordinary	43.2779
BRCA1	HIST1H2BH	redundant	157.485
RAP1B	MAP2K1	ordinary	35.7584
PSMC2	VHL	ordinary	49.498
CA3	ATP6V1D	ordinary	642.349
TRIP10	RHOT1	ordinary	57.7043
PDCD1LG2	CD3D	ordinary	195.04
ARHGAP10	RHOBTB2	ordinary	154.5
IL1RAP	BTK	ordinary	22.1458
PSMB10	TNFSF12	ordinary	161.686
CHMP5	CHMP6	ordinary	36.1179
SPCS3	SEC61G	ordinary	70.3123
ATXN7	HIST1H3H	ordinary	147.588
PPP2R2A	FOXM1	ordinary	187.612
PIK3R1	PACSIN1	ordinary	290.35
FZR1	MCM5	ordinary	89.2721
USP13	BECN1	ordinary	31.4262
H2AFV	H3F3B	ordinary	37.3612
2020-03-02	SLC3A2	ordinary	84.7135
GRIN2D	MYL12B	ordinary	96.7092
ARHGAP4	RHOU	ordinary	116.408
SEMA3A	DPYSL3	ordinary	156.967
ORAI2	CALM1	redundant	132.393
CAMK2D	MYL9	ordinary	142.121
PSME4	OAZ2	ordinary	29.0124
ATP1B1	GNG4	ordinary	52.5444
TRPC4AP	SORBS1	ordinary	inf
CCNK	POLR2A	ordinary	56.7523
TDP1	PRKDC	redundant	106.686
SEC16A	SEC31A	ordinary	132.885
NEDD8	UBE2F	ordinary	132.396
RABGGTB	RAB5B	redundant	23.9301
ARHGEF12	CDC42	ordinary	64.7008
VAMP3	INPP4B	ordinary	215.886
RMI2	FEN1	ordinary	473.275
CA13	AQP11	ordinary	15.2017
AAAS	CPSF4	ordinary	71.3769
PGM2	TKT	redundant	37.5388
SOCS3	STAT1	redundant	225.9
PSMA5	EGLN3	ordinary	159.617
POLR2E	HIST4H4	ordinary	42.2395
SLC6A9	SLC9A8	redundant	64.1152
TP53BP2	TP53I3	ordinary	23.8586
SLC5A6	AHCYL2	redundant	12.9393
GNG12	DGKZ	ordinary	113.033
NADK	PKM	ordinary	92.6
RANBP2	SMN1	ordinary	38.8725
PSME3	MAP3K14	redundant	47.0587
ATP2B4	MYL12B	ordinary	128.913
FGFR1	CYFIP2	ordinary	69.3743
TP53	CABIN1	ordinary	29.0948
PSMC4	PPP2CB	redundant	144.768
CBFB	LEF1	ordinary	119.425
KCNN3	FXYD6	ordinary	69.3487
LY96	IRAK2	ordinary	55.8613
POM121	WDR33	ordinary	30.1308
UBA52	VAMP8	redundant	157.401
FOLH1	TPGS2	ordinary	31.3795
VEGFA	PLCG1	redundant	34.4657
DVL1	KDR	redundant	155.873
BRPF1	HIST1H3E	ordinary	46.1885
CCT5	BBS4	ordinary	97.9798
PIK3CB	SLC2A8	redundant	43.1542
ATM	SUMO2	redundant	80.234
PECR	PHYH	critical	183.523
MAPK14	HIST4H4	redundant	60.4666
MAP2K1	FXR1	ordinary	40.1074
HIST4H4	BARD1	ordinary	130.079
CACNB4	CLCA2	ordinary	24.6577
UBB	AGTR1	redundant	16.958
TNFRSF10C	TNFRSF10B	ordinary	86.3624
ZCCHC11	EIF4A1	ordinary	156.964
BIN1	TGOLN2	ordinary	157.78
SLC4A4	SLC38A5	ordinary	78.8424
PSMA1	LTB	ordinary	65.7655
DVL3	IRAK4	redundant	60.2022
MTF2	HIST1H3E	ordinary	46.8503
ESPL1	AHCTF1	ordinary	253.399
STON1	SLC2A8	ordinary	134.692
PICALM	CD4	ordinary	101.659
STARD8	RHOH	ordinary	164.378
PSMB6	UBC	redundant	31.2113
PLCG1	DAGLA	ordinary	17.0956
LRRFIP1	CD3G	ordinary	15.8591
SUPT5H	TAF13	ordinary	42.5824
PKM	ATP6V1B2	ordinary	85.4777
EYA2	HIST2H2BE	ordinary	98.0832
GMPPB	ALG2	redundant	85.551
SLC1A2	TTLL1	ordinary	42.3793
PSMD4	ITCH	redundant	103.893
CNOT11	EIF4A2	ordinary	112.561
CACNA1C	DMD	ordinary	390.088
PPM1A	PRKAG2	ordinary	48.2419
COPS7B	ASB8	ordinary	93.0017
RRP1	UTP20	ordinary	52.149
CARM1	AGT	redundant	64.6156
FCGR2A	SYK	ordinary	77.2899
CHST12	CSPG4	ordinary	21.1282
SRC	TRAK1	ordinary	78.73
PRMT5	HIST1H2AC	redundant	84.1606
TRPC4AP	PRKCZ	redundant	59.246
LRIG1	EGF	ordinary	60.3869
CLASP1	DIAPH2	ordinary	223.861
CUL5	RPS27A	ordinary	47.707
ATP6V1C1	PNP	ordinary	85.1471
GRIN1	GNAI1	redundant	416.035
GRPEL1	FXN	ordinary	13.6748
P2RX7	MYL9	ordinary	121.389
CD3E	PRKCQ	ordinary	368.417
EGFR	PIP5K1A	redundant	91.9277
CYBRD1	SLC40A1	redundant	90.7082
GMPS	LARS	redundant	91.6561
SLC4A5	SLC22A4	ordinary	15.3915
CBLB	ITPR3	redundant	66.3119
ITPR3	ACTG2	ordinary	86.7211
TRPV6	RASGRF1	ordinary	62.0552
ALAS1	PDHB	ordinary	39.3844
FAAP20	FANCD2	ordinary	172.073
MTMR9	PPP2R5B	redundant	41.889
SPTBN2	ACTR10	ordinary	27.7713
ARF3	BET1	ordinary	78.3484
CACNA1D	ANXA1	ordinary	389.168
SRC	FCGR3A	redundant	108.258
TAF1B	HIST1H2AC	ordinary	70.3429
ATP6AP1	AK9	ordinary	143.274
LRP5	GSK3B	redundant	41.2281
CCAR2	HSPA2	ordinary	18.0285
SLC6A9	CLCA2	ordinary	61.6394
ELOVL7	ACSL1	ordinary	502.649
NUP54	HSPA4	ordinary	74.8993
WNT5A	ARPC2	ordinary	21.4333
DNM1	SLC2A8	redundant	29.4604
IRAK1	CUX1	redundant	55.1549
HADHB	DBT	redundant	129.921
NBN	POLE4	redundant	30.8634
PLA2G6	DCTN5	ordinary	55.6424
HLA-DRA	LCK	ordinary	360.852
COPS2	DCAF7	ordinary	86.4681
ATP6V0D1	UPP1	ordinary	25.0364
PIK3CD	PTPN13	redundant	18.0715
TOP3A	GTF2H3	ordinary	29.304
PEBP1	MAP2K2	redundant	42.999
KAT5	LIG3	ordinary	83.2732
FNBP1L	SCARB2	ordinary	47.6544
TRPC4AP	CALM3	redundant	62.6488
MYO1C	HIST1H3H	ordinary	244.121
NUP210	SUMO1	redundant	219.669
B3GAT3	BGN	ordinary	228.311
CAMK2D	CACNG4	ordinary	83.1661
POM121	INCENP	ordinary	134.414
SYK	KL	redundant	289.807
GNGT2	ITK	ordinary	178.18
RAB33B	COG4	ordinary	42.1505
PSMD6	PPP2R5A	redundant	36.9475
ITSN2	EPS15L1	ordinary	103.189
HRASLS5	GDPD3	ordinary	100.56
DCAF11	NEDD8	ordinary	140.462
CDK1	DYNLL2	ordinary	242.29
SLC8A1	CACNA2D2	redundant	41.1949
BIN1	VAMP2	ordinary	221.776
GNG4	CALM1	ordinary	73.7764
RPS5	WDR46	ordinary	131.72
TRAF6	FCGR1A	redundant	134.01
BEST1	CA12	ordinary	97.9139
RBBP7	HIST4H4	ordinary	95.236
RPA3	RAD51AP1	redundant	208.424
FKBP1B	PPP3CA	ordinary	21.0068
MAPK3	BLZF1	ordinary	32.6075
ITPR1	SLC24A1	ordinary	44.4861
CAPZB	HSP90AB1	ordinary	75.0165
PLCG2	TEC	ordinary	77.6803
COPS5	CUL3	ordinary	52.6281
PIP5K1B	PIK3CB	ordinary	20.9026
ASIC3	SLC9A8	ordinary	59.2521
FXYD3	KCNQ1	ordinary	55.0024
SRI	ATP2B4	ordinary	116.616
PSMD14	APC	redundant	124.64
SEC11A	RPS28	ordinary	28.895
SCN7A	SLC9A9	ordinary	274.537
POLR2H	HIST1H4I	ordinary	232.947
SLC25A5	ATP6V0E2	ordinary	86.0767
IRAK1	MYO18A	redundant	53.5334
PDGFRA	WASF3	ordinary	339.479
SMAD4	CDKN2B	ordinary	91.3753
GNAI1	CALM1	redundant	427.677
TRPC1	RASGRP4	redundant	200.324
COPS8	CISH	ordinary	65.7657
CSNK1E	DVL3	ordinary	81.8397
PRKACB	PPP1R1B	redundant	14.3362
ARHGAP35	HRAS	ordinary	65.8872
ACSL5	PPARD	ordinary	71.1524
KLB	FYN	ordinary	inf
COPS5	FBXL7	ordinary	50.6147
RTEL1	RMI1	ordinary	127.943
SH3GL1	ARPC1A	ordinary	116.543
PTEN	FRS2	redundant	84.2317
ATP1A3	SLC4A8	ordinary	111.759
TOMM20	HSPA9	ordinary	83.3765
FN1	MAP2K2	ordinary	199.795
PAK2	CALM1	redundant	46.0187
RNF40	HIST1H2BJ	ordinary	133.075
PSME2	ANAPC2	ordinary	115.808
AAAS	HSPA1A	ordinary	63.2486
RMI1	RFC4	ordinary	225.034
RBL2	CDC6	ordinary	184.093
GPSM3	GNAI2	redundant	177.13
EIF1AX	RPL13	ordinary	24.232
RYR2	CACNA1C	redundant	23.1735
FGFR1OP	RHOA	ordinary	21.8425
HDAC10	HIST1H2BD	ordinary	157.421
TRPC4AP	PXN	redundant	52.3439
ATP1A4	KCNN4	ordinary	22.231
TRPV4	SLC8A1	ordinary	15.5624
NUP160	HSPA4L	ordinary	59.3802
PSMD1	TNF	redundant	37.5197
RB1	CDT1	ordinary	217.202
ZDHHC2	SLC27A5	redundant	73.6574
ARHGAP5	RAC3	ordinary	120.489
EXOSC5	RPS6	ordinary	146.65
HDAC1	CDK1	ordinary	303.673
GNGT2	CACNB2	ordinary	17.9704
CDK1	H3F3A	redundant	369.666
POM121C	HSPA4L	ordinary	40.8424
NFIX	POLR3H	ordinary	41.9857
AXL	GRB2	ordinary	100.051
DIAPH2	NUP43	ordinary	161.254
TCIRG1	AK9	ordinary	54.1865
B3GNT9	MUC6	ordinary	22.6168
ARHGAP35	RHOT1	ordinary	26.6095
PSMC3	TPP2	ordinary	63.98
PPP1R12A	MYL12B	ordinary	77.4768
NME1	IFT122	ordinary	148.553
PACSIN3	DAB2	ordinary	143.631
SAE1	SUMO3	redundant	153.403
OCRL	EGF	redundant	51.3722
ARHGAP19	RHOG	ordinary	182.004
CHN2	RAC3	ordinary	74.0041
CNOT6	EIF4A1	ordinary	91.5082
GRAP2	ITPKB	ordinary	27.4082
CACNA2D2	TMOD3	ordinary	27.7215
POLE2	EXO1	ordinary	481.897
RPS23	UTP14C	ordinary	29.6699
PSMD10	HNRNPD	ordinary	91.8852
PSMB10	TNFRSF11A	ordinary	42.85
CCND2	RUNX1	redundant	61.9011
TAF5L	HIST1H3H	ordinary	164.697
COPS6	BTBD1	ordinary	46.4044
DNM3	IGF2R	redundant	46.676
SF3B1	HIST1H3H	ordinary	134.217
PLD1	PITPNM3	ordinary	117.871
ERBB3	SHC1	ordinary	69.3348
CALM1	STXBP1	ordinary	165.923
GTF2H2	GTF2F1	ordinary	28.0254
VAMP3	PIP5K1C	ordinary	226.342
AKAP9	PLN	redundant	224.857
ACOT2	ACSF2	ordinary	58.7139
AKAP9	CALM2	redundant	28.4783
DBF4	PRIM1	redundant	218.542
SCN2A	GRIN2D	ordinary	218.025
ERBB4	ZMYM2	redundant	53.7312
CHML	RAB36	ordinary	49.0496
GRB2	VAMP3	redundant	256.435
ABCD1	PLA2G16	ordinary	96.8999
HLCS	ACACA	ordinary	69.9834
PIK3CB	VAMP3	redundant	236.002
POLR2D	ATM	ordinary	68.3396
TRPM7	CAMK2B	redundant	15.6703
SUCLG1	HADHA	ordinary	317.67
PPFIA1	SLC1A3	ordinary	117.647
UBB	FANCM	redundant	33.6386
BIRC2	TICAM1	redundant	35.5917
CATSPERG	PPFIA3	ordinary	70.0364
PIAS2	UBE2I	redundant	55.448
SEC24C	F8	redundant	307.92
CLCN7	SLC4A8	ordinary	97.0202
OPLAH	SLC25A22	ordinary	179.54
CASP6	LMNA	ordinary	75.9979
EP300	VEGFA	redundant	39.4353
ATG12	ATG10	ordinary	74.5059
PLCD1	DGKG	ordinary	51.6742
CTNNB1	TCF4	ordinary	89.9249
PIK3R3	SHC1	redundant	61.67
PTEN	GNB2	ordinary	170.101
EED	HIST1H2BD	ordinary	143.288
ISG15	KPNB1	ordinary	135.541
PSMD11	ANAPC1	ordinary	54.5159
ARHGAP26	RHOQ	ordinary	432.506
SLC6A8	ATP1B1	redundant	20.65
STAT2	STAT1	ordinary	372.581
GNG11	PRKCD	ordinary	443.004
EGF	BAG4	redundant	52.0463
SAP18	H2AFX	ordinary	152.86
OSBP	PPM1L	ordinary	104.214
PSMC4	TRAF2	redundant	241.717
SLC1A1	ATP1A1	redundant	43.1268
PPP1R12B	MYH14	ordinary	539.633
COPS7A	DDB2	redundant	44.0086
CAMK2G	ATP2C1	ordinary	50.6973
RXRA	ANGPTL4	redundant	108.125
DGAT2	SLC27A5	redundant	393.882
ARHGAP27	RHOJ	ordinary	226.003
ADRA2A	GNB1	redundant	80.4784
PSMC3	CUL5	redundant	109.278
DVL1	PIK3R4	ordinary	63.0781
2020-09-02	PRKAR2B	ordinary	358.395
CUX1	VAV2	ordinary	222.974
NELFB	CHEK1	ordinary	123.606
GRB2	TF	redundant	112.969
ZFHX3	CDKN1A	ordinary	12.7904
LDLR	SCARB2	ordinary	20.0133
ATP6V1G1	NME2	ordinary	107.988
RPS24	DIEXF	ordinary	19.2352
AP2B1	IGF2R	ordinary	45.6603
ERBB2	AKT1	ordinary	131.871
PTPRA	HRAS	ordinary	49.5177
PLA2G6	GALNT2	ordinary	40.8218
TRPC1	RIMS1	ordinary	137.297
PTPN22	HLA-DQB1	ordinary	117.14
SPTBN1	TMED2	ordinary	666.001
CBL	SYT11	redundant	128.443
ACOT11	ACSL5	ordinary	45.4329
KAT5	POLR2K	ordinary	65.6356
ACOT13	SLC27A2	ordinary	26.9441
AHCYL1	GNAI1	redundant	400.677
SAP30	HIST2H2BE	ordinary	150.605
KITLG	STAT5A	ordinary	198.12
CA3	ATP6V1C2	ordinary	636.392
SUDS3	HIST3H2BB	ordinary	115.554
TPCN2	RAB3A	redundant	76.5948
ARHGEF38	RHOC	ordinary	38.8207
SREBF2	CYP51A1	redundant	92.0136
EIF5	RPS15	ordinary	42.8285
RNF8	SUMO2	ordinary	75.4943
EXOSC3	NOL6	ordinary	110.951
SH3KBP1	ITPKB	redundant	73.9228
TAF9B	HIST1H2BN	ordinary	64.3906
CAMK2D	ANXA2	ordinary	39.6726
USP21	IL33	ordinary	274.224
SEC24D	FOLR1	ordinary	67.0317
PSMA4	PPP2R5B	redundant	65.5945
GSR	GSTO2	redundant	53.5962
PIK3R3	RAC1	redundant	50.7123
PSMD7	GOT1	redundant	35.6552
BCR	RHOC	ordinary	40.9961
GNG7	GAB1	ordinary	94.3381
MAPKAP1	SGK1	ordinary	147.962
PSMD8	AMER1	redundant	44.948
CLTB	FZD5	ordinary	78.8345
MCOLN3	SORBS1	ordinary	inf
STX1A	MCOLN3	ordinary	94.0813
CACNB1	TPM3	ordinary	108.945
PIP5K1A	SYK	redundant	69.629
IRAK4	SHC1	redundant	22.5942
LCLAT1	LPIN3	ordinary	61.763
AKAP1	LMOD1	ordinary	442.79
SLC9A5	ATP1A3	ordinary	71.7565
CHD4	HIST3H2A	ordinary	132.166
AP2M1	TF	ordinary	102.555
ARL2BP	CALM3	redundant	43.8474
CARM1	NPAS2	redundant	49.749
PIP5K1B	VEGFA	redundant	43.9938
MBIP	HIST1H3E	ordinary	108.163
DNM1	VAMP4	redundant	28.96
PIP5K1B	PPP2R5D	redundant	34.2616
PSMC3IP	HIST2H2BE	ordinary	130.202
COPS2	SPSB2	ordinary	120.969
POM121	HSPA12B	ordinary	131.451
SPCS1	RPL24	ordinary	46.6496
AP2A1	PTPN13	ordinary	49.1822
DIAPH2	SPC24	ordinary	346.041
MPC1	DLD	ordinary	63.93
SNX18	SYT9	ordinary	95.6089
CDC37	GAB1	ordinary	69.6893
AKAP1	MYL9	ordinary	149.927
STX1A	TRPC1	redundant	209.955
AKT3	PHF20	ordinary	52.5976
MCOLN3	VIM	redundant	166.679
PSMD5	WTIP	ordinary	77.9829
ATP1B1	SLC3A2	redundant	49.1586
PSME4	TNFRSF13C	ordinary	31.5628
KDM6B	HIST1H2AE	ordinary	47.3012
NUP37	HSPA1L	ordinary	35.689
NLK	MYC	redundant	86.4653
RBBP8	CDK7	ordinary	80.3541
CACNA1A	CACNB3	redundant	122.708
CAMK2D	EPB41L1	ordinary	58.8449
ATP1A3	KCNQ5	ordinary	76.7751
RPIA	PRPS1	ordinary	30.9224
MAML2	HEYL	ordinary	221.915
NUPL2	HSPA1B	ordinary	14.4591
EXOSC10	WDR75	ordinary	56.7814
PTPN22	HLA-DPA1	ordinary	203.084
SRSF10	SRSF2	ordinary	135.173
ANAPC4	FZR1	ordinary	91.7228
CHRM3	GNAQ	ordinary	33.8765
DLD	GCDH	ordinary	30.3326
GNPAT	MORC2	ordinary	99.444
BRCA1	ERCC6	redundant	86.419
EXOSC9	IMP3	ordinary	30.8309
OTUD7B	TNF	redundant	35.3291
PSMB5	TNFRSF13C	ordinary	64.8257
GNG11	CPSF6	ordinary	485.796
TPCN1	SLC24A2	ordinary	225.275
GNB1	ERLIN2	ordinary	23.4789
ARHGAP11A	RHOD	ordinary	215.146
RCOR1	HIST1H2BG	ordinary	67.082
RAF1	RAP1A	redundant	35.7144
SRI	ATP1B2	redundant	108.493
GAB2	FCGR1A	ordinary	98.7242
PSMD11	AJUBA	redundant	54.3058
MORF4L2	HIST1H2AC	ordinary	165.116
LDLR	TF	ordinary	67.1268
PREX1	RHOB	ordinary	47.6279
CATSPERB	CAMK2G	redundant	30.4396
NUP88	SNUPN	ordinary	20.1118
ERCC2	RAD51D	redundant	45.9539
PDCD1	HLA-DPB1	ordinary	398.346
TPCN1	TPM3	ordinary	185.138
ITPR2	SYT1	redundant	70.7447
SLC24A2	GRIK4	ordinary	209.4
CA2	ATP6V1G1	ordinary	92.1727
CUL3	DVL3	redundant	65.4454
XRN1	LSM3	ordinary	66.676
UBA52	POLD3	ordinary	16.9385
SPIDR	BLM	ordinary	126.259
TYROBP	CNTRL	ordinary	18.1219
AP2A1	INPP4B	ordinary	37.1138
PIP5K1A	PDGFRA	redundant	149.966
RPS5	EMG1	ordinary	27.2151
SLC4A7	MFSD2A	ordinary	23.6733
AHCYL1	CPLX1	ordinary	50.1325
[truncated: 71,528 more rows]

## Sheet: COAD
node1	node2	edge_type	activity
NUP153	HSPA12B	ordinary	16.3426
NUP98	CDCA8	ordinary	79.398
SOCS1	LY96	redundant	23.8118
SOCS1	TLR2	ordinary	13.6719
EGFR	FGFR3	redundant	29.6368
NFYA	DDIT3	ordinary	40.3681
CACNA2D1	ATP2A3	ordinary	96.6647
PIK3CA	CD3D	redundant	13.9406
TRPM6	PRKCD	redundant	294.254
SH2D2A	CYFIP2	redundant	29.7586
INPP5K	AP2A2	ordinary	43.2709
AHCYL1	TNNC2	ordinary	28.8138
PLAT	PDGFD	ordinary	114.04
PIP4K2C	ERLIN2	redundant	14.7686
ATP6V1E1	ADPGK	ordinary	34.8927
CATSPERG	ANXA1	ordinary	30.3149
FGFR1OP2	FYN	ordinary	20.1475
NOL12	HEATR1	ordinary	69.6435
PIK3R6	BIN1	ordinary	35.3933
ACVR2B	BMPR1A	ordinary	112.638
GNG7	PRKCQ	ordinary	139.659
UIMC1	HIST1H2AG	ordinary	17.754
CCNB2	SEC13	ordinary	60.8365
STAT4	LCP1	ordinary	157.524
PSMB7	PPP2R5C	redundant	27.997
FCGR1A	FGFR1OP	ordinary	29.9569
RIOK3	RPS4X	ordinary	153.596
ST3GAL3	MUC12	ordinary	54.1705
COPS8	KLHL25	ordinary	61.2617
PIP5K1A	WASL	ordinary	98.8076
CHMP4A	UBA52	ordinary	29.5825
AGO4	CDKN2A	ordinary	39.0718
GFRA1	KRAS	ordinary	143.591
GNG11	INPP5K	ordinary	57.1372
ATP6V1F	AK7	ordinary	55.1257
ELL	RPS27A	redundant	41.299
MAPK3	NCKAP1	redundant	72.7501
MYD88	LAT2	ordinary	46.8448
PIP5K1C	GNAI3	redundant	44.0404
SEC23A	SEC22B	ordinary	63.5556
COPS4	WDR5	ordinary	56.163
PSMA4	CDC16	ordinary	40.0557
ADCY7	AKAP5	ordinary	40.0586
POM121C	SNRPF	ordinary	80.7909
GNAI1	CACNA2D1	ordinary	139.992
ANK3	KDELR3	ordinary	183.63
PLCE1	DAGLB	ordinary	201.645
MTMR14	PLBD1	ordinary	14.9358
GTF2H5	POLR2B	ordinary	16.7355
CALM2	PDE10A	ordinary	36.9925
ARRB1	MAPK3	ordinary	131.822
DZIP1	GLI3	redundant	409.282
SLC25A4	GNAI1	redundant	86.3367
MCOLN1	MYL12B	ordinary	32.5934
VCL	MAPK1	ordinary	109.303
IVD	MCCC1	ordinary	21.6122
RPL38	UPF1	ordinary	29.1078
TFAP2A	PITX2	redundant	50.6299
RFC5	XRCC2	ordinary	181.324
KIF2C	HLA-DRB1	ordinary	87.6398
EXOSC6	DIEXF	ordinary	96.441
SIRT1	TAF1B	ordinary	63.1133
GNG12	DGKA	ordinary	88.1836
SEC11A	RPL36AL	ordinary	57.2193
NIP7	UTP15	ordinary	134.394
JUN	KDM6B	ordinary	16.3299
TRIM24	RAC1	ordinary	33.5745
DNA2	RFC1	ordinary	98.1359
SRGAP3	RAC1	ordinary	18.37
LPCAT3	ATAT1	redundant	145.96
PIK3CD	BAIAP2	redundant	39.6397
FBXO11	CUL1	ordinary	44.6579
BRD8	HIST1H4I	ordinary	14.8967
SPRED2	RASAL3	ordinary	32.3793
PIK3R2	TGOLN2	redundant	31.633
P3H2	COL28A1	ordinary	63.7775
PSMD8	ANAPC16	ordinary	18.5855
HLA-DQB1	ZAP70	ordinary	46.0758
ATP6V0C	ARL2BP	ordinary	21.8307
SLC5A9	KCNJ11	redundant	39.9862
PSMD7	REL	ordinary	26.7397
CAMK2G	CPNE7	ordinary	194.588
EXO1	POLR2E	ordinary	74.7129
HK2	SLC37A1	ordinary	110.696
CAPZB	HSP90AA1	ordinary	51.011
SUPT16H	CHEK1	ordinary	138.441
PTEN	FGF7	redundant	94.0368
EXO1	POLR2L	ordinary	80.3787
RAB3IP	RAB8A	ordinary	49.9791
ARHGAP6	RHOBTB2	ordinary	13.7145
POLR2H	FANCI	ordinary	100.69
AGPAT4	SLC27A2	ordinary	25.771
BIRC2	LY96	redundant	52.6445
NCOA2	AKAP9	redundant	176.64
P2RX4	CAMK2G	redundant	165.144
USP21	TAB1	ordinary	16.4266
IRAK1	CYFIP2	redundant	43.0655
CA1	ATP6V0A1	ordinary	249.658
GPS1	SOCS3	ordinary	15.4322
SLC25A16	BCKDHB	ordinary	68.2318
SUCLA2	CPT2	ordinary	176.683
COPS7A	BTRC	redundant	16.9084
CCNB2	CENPU	ordinary	135.803
PIP5K1A	RAP1B	redundant	56.9127
EXO1	FANCE	ordinary	125.325
EIF5	EIF4G1	redundant	19.8248
NRG1	INPP5J	ordinary	56.0627
CHD4	HIST1H2AC	ordinary	30.9855
AGFG1	ACTR3	ordinary	115.558
ADCY9	RAPGEF3	ordinary	135.874
PDGFB	KRAS	redundant	36.8039
PEMT	PTDSS1	ordinary	65.1801
RORA	NPAS2	redundant	24.3709
GNPDA1	MPI	ordinary	103.602
SPTBN5	COPZ1	ordinary	70.7757
CACNA2D1	TNNI1	ordinary	51.3474
ARHGEF19	RHOH	ordinary	68.4767
AGBL5	RARS	redundant	27.9488
DAPP1	CALM2	ordinary	29.2362
SH3KBP1	NCK1	ordinary	71.4144
PIK3CA	FGF2	redundant	83.8
FAM13A	RHOQ	ordinary	12.6653
PSME2	SKP2	ordinary	44.1211
COPS8	SPSB2	ordinary	35.6178
PKM	ATP6V0D2	ordinary	113.778
GNG2	ITPKC	ordinary	123.913
ROCK1	MYH9	ordinary	60.8506
MAN2B2	MANBA	critical	29.8701
MCAT	HADHA	ordinary	135.542
INPP5J	AP2A1	ordinary	45.3821
GPSM3	ACKR3	ordinary	37.0483
PIK3R5	AP2A1	ordinary	20.581
PRKAG2	LAMTOR5	ordinary	35.4097
TP53	NDRG1	ordinary	56.3083
TCIRG1	DTYMK	ordinary	54.6207
TAGAP	RHOC	ordinary	71.328
TNFSF13B	MAP3K14	ordinary	15.8697
CTTN	VAMP2	ordinary	94.2335
PSMC5	LTBR	ordinary	18.2253
HMGCR	ACSL4	ordinary	38.9852
AGPAT3	LPIN1	redundant	34.0246
DDX58	CASP8	ordinary	42.0532
PSMD6	CKS1B	ordinary	77.0994
RPS15A	WDR36	ordinary	30.4705
SLC35A3	MGAT4B	ordinary	41.1724
CEP152	AURKA	ordinary	108.737
IRAK3	TOLLIP	ordinary	19.0646
PRKAA1	RB1CC1	ordinary	62.8628
CDK1	H2AFZ	redundant	179.609
UBE2V1	PRKCQ	redundant	18.5882
CDK6	TFDP1	ordinary	66.5627
SLC52A2	RFK	ordinary	83.7418
DUSP7	MAPK7	ordinary	64.3049
NUP160	SNUPN	ordinary	54.2033
PIP4K2B	GNA15	redundant	23.4699
CLCA1	SLC26A3	ordinary	176.553
B3GLCT	THSD7A	ordinary	38.1043
MAPK7	MEF2A	ordinary	67.1072
SYNJ2	M6PR	redundant	14.1787
MAT2B	SLC25A26	redundant	36.7868
PDPN	PRKCQ	ordinary	40.9875
UBC	PIP5K1A	redundant	27.2679
CALM1	GRIN1	redundant	83.8749
USP21	TRAF2	redundant	38.0309
CD36	IRAK2	ordinary	105.002
ERCC1	ATM	redundant	13.3199
FTSJ3	DDX49	ordinary	37.7708
CLIC2	RASGRF2	ordinary	54.0976
CAMK2G	AKAP1	redundant	87.1362
PSMB6	UBB	redundant	99.8281
UBA52	RFC1	ordinary	82.8041
DDX21	H2AFX	redundant	103.848
MCOLN1	TLN1	ordinary	70.5273
NFIA	POLR3K	ordinary	47.7053
LIG1	AQR	ordinary	46.0837
DVL2	AXL	redundant	31.4136
PIK3CD	NCKAP1	redundant	21.2854
B3GNT2	MUC5AC	ordinary	27.0878
FCGR2A	PLCG1	ordinary	38.3348
PSMC3	CDC27	ordinary	46.0961
ORMDL2	MORC2	ordinary	85.5772
PLCE1	PRKCD	ordinary	240.573
CARM1	HMGCS2	redundant	61.7688
SLC6A20	CAMK2G	ordinary	99.0212
RBL2	CDC25C	ordinary	59.5236
GNA14	TRPC6	ordinary	37.6964
PSMC2	CDC20	ordinary	79.8349
AGMO	NOS3	redundant	24.5163
NUP98	SMN2	ordinary	25.4503
CDK1	CDC26	ordinary	71.2566
PSMA6	MAD2L1	ordinary	101.237
PIK3CG	CLTCL1	ordinary	63.8915
PSMA4	OAZ2	ordinary	24.193
PSMD7	AJUBA	redundant	246.523
PSMA5	BIRC3	redundant	32.8681
KDM4A	SUMO1	ordinary	48.005
ZMYM2	ABI2	ordinary	88.1164
USP1	MUS81	ordinary	16.6598
STAT3	JUNB	redundant	15.406
GRB2	SYT11	redundant	69.557
PSMA2	NPEPPS	ordinary	44.2194
CACNA2D4	CPLX1	ordinary	36.0496
TRAPPC4	CHML	ordinary	31.8149
MYD88	ERLIN2	ordinary	25.5808
KAT5	RFC4	ordinary	78.2926
PSMB6	SMURF2	redundant	24.5731
ICOS	CUX1	ordinary	13.1788
CPT1B	AACS	ordinary	14.3932
PIK3CD	VAMP3	redundant	27.7548
COPS2	COMMD8	ordinary	94.1959
SLC4A7	CAMK2G	redundant	81.7956
SMAD4	SMAD7	ordinary	59.3614
SRC	CD247	redundant	25.5222
EREG	BAG4	ordinary	56.0344
PIK3CB	FGFR2	redundant	79.9096
AKT1	GUCY1A3	ordinary	20.2696
ATP2B1	PPP3R1	ordinary	97.5112
SUMO1	KDM4B	redundant	22.2874
XRN2	RPS15A	ordinary	38.2755
CBL	IGF2R	redundant	58.7298
EIF5	RPS6	ordinary	31.5369
FGFR1OP	STAT3	ordinary	29.0121
PIP5K1C	FGF18	redundant	49.9513
PSMC4	SKP1	ordinary	20.6882
PSMB2	PRICKLE1	redundant	61.1709
POU2F2	POLR2A	ordinary	64.8319
C1GALT1	MUC13	ordinary	44.1948
RNLS	PXDN	ordinary	14.3481
CNGA1	AKAP9	redundant	106.128
GNG4	INPP5J	ordinary	72.14
EP300	HIST1H2AG	redundant	20.9044
ARHGAP33	RHOT2	ordinary	74.7174
SLC25A13	MARS	redundant	49.9395
PCOLCE	COL24A1	ordinary	91.9577
ATP1B3	KCNN4	ordinary	78.0664
TRPC4AP	PYGB	redundant	53.6091
EXOSC9	WDR46	ordinary	77.3029
PSENEN	DTX2	ordinary	22.9834
PDGFRB	INPP5D	ordinary	38.7459
PSMC5	PPP2R1B	redundant	21.0407
MTA2	HIST3H2A	ordinary	61.7217
RFC2	RAD51AP1	ordinary	101.623
P3H3	COL5A3	ordinary	74.2777
FAM20C	FSTL3	ordinary	96.49
DLG1	VDAC1	redundant	27.5597
NIPAL2	MMGT1	ordinary	46.7472
DNA2	FANCI	redundant	233.299
SEL1L	IHH	ordinary	64.8629
TAF1B	HIST1H2BJ	ordinary	48.9448
GNB4	ZMYM2	ordinary	42.1369
MAPK1	FGFR2	redundant	100.493
RBBP4	BRD1	ordinary	16.4465
TAF1A	HIST1H2BG	ordinary	62.9327
ATP2B4	ATP2C2	ordinary	124.756
PIP4K2C	PIK3R3	ordinary	24.4734
ORAI1	SORBS1	ordinary	99.8389
CCDC8	BIRC5	ordinary	92.596
RMI1	APEX1	ordinary	48.5436
PSMC5	NPEPPS	ordinary	22.7192
RAE1	AURKB	ordinary	116.3
GPSM3	CXCL8	redundant	53.0552
CHRNA3	CACNB2	redundant	97.6577
TPCN2	MYL6B	ordinary	33.6582
PIP5K1B	EGFR	redundant	85.4545
AKT2	BRPF1	redundant	36.4369
PIK3R3	AKT2	redundant	19.1018
COPS8	SKP2	ordinary	97.2322
POLR1D	HIST1H2BN	ordinary	55.1011
NUP85	HSPA4L	ordinary	82.287
PSMD12	TNFSF12	ordinary	91.0675
NME1	TTC21B	ordinary	83.8078
ANK2	TMED9	ordinary	158.216
TRPM6	ATP2A1	ordinary	265.69
GNAI1	TRPM6	ordinary	297.871
HIST1H2BD	H2AFX	ordinary	42.0873
LEF1	HIST1H2BG	ordinary	55.3853
NUP214	PHAX	ordinary	13.5636
XRCC5	TMEM173	ordinary	33.4989
DVL1	EPHB6	ordinary	27.7022
LPGAT1	ACSS2	redundant	63.6886
NUP188	CPSF4	ordinary	99.2182
RBBP8	HMGN1	ordinary	40.1885
GLE1	TPR	ordinary	18.7655
NFYA	PMVK	redundant	30.5162
CHAC2	CNDP2	ordinary	20.6725
DVL1	PIK3R2	ordinary	46.8015
FBXW4	CUL1	ordinary	36.7352
PPP5C	NRAS	redundant	44.0236
ORAI2	TMOD1	ordinary	105.746
POLK	RAD50	ordinary	111.684
SLC25A16	CPT2	ordinary	181.897
RBBP8	CCNH	ordinary	25.0227
DCTN5	HSP90AA1	ordinary	30.6498
SYDE2	RAC3	ordinary	30.1423
VAMP7	SH3D19	ordinary	35.3866
ITSN1	ARPC1B	ordinary	47.2054
SLC38A9	RPS6KB1	ordinary	57.6977
PTGS2	PTGIS	redundant	26.9801
ANO1	SLC6A6	ordinary	109.368
ASB7	NEDD8	ordinary	76.2515
CALM1	PYGL	redundant	89.6443
P2RX7	PLN	redundant	170.173
CEACAM1	FN1	critical	153.821
FKBP1B	VAMP2	redundant	125.806
PSMB6	CDK2	redundant	86.5326
HAUS5	AURKA	ordinary	162.891
MMP9	CDH1	redundant	28.7986
FAM13B	RHOBTB2	ordinary	61.6746
MGLL	AQP9	ordinary	121.97
PIP5K1C	PIK3CD	ordinary	76.931
DEK	HIST1H4I	ordinary	23.6135
RPS15A	EMG1	ordinary	35.2497
CA13	ATP6V1D	ordinary	52.8376
CACNA2D1	MYL6B	ordinary	74.2319
OSBPL10	SACM1L	ordinary	68.5904
IL1RAP	FCGR1A	ordinary	53.703
MET	BCR	ordinary	109.293
AGTPBP1	BCAT1	ordinary	48.5396
SPCS2	RPL21	ordinary	15.9581
CAMK2G	SORBS1	ordinary	175.939
PIK3R1	CD3G	redundant	32.2623
ATP1B1	CNGA1	ordinary	47.2666
ACTR8	RAD23B	ordinary	30.9833
HGS	EGFR	redundant	35.927
ACTR1B	ACTR1A	redundant	22.9393
TRPV4	DYSF	ordinary	84.8696
REEP4	OR51E1	ordinary	15.4757
TNRC6C	NOTCH4	ordinary	40.1447
GNB1	ATP1A1	ordinary	22.007
TRPV4	TNNC1	ordinary	32.2825
PTPN6	HLA-DRB1	redundant	35.9918
AGTPBP1	TTLL1	ordinary	26.361
IFT140	AKAP5	ordinary	66
SMDT1	SLC8B1	ordinary	38.7263
TBL1XR1	FADS1	redundant	29.962
PLD2	PLA2G2A	redundant	17.6279
CCNB2	TPR	ordinary	57.3937
PSMB2	TNFSF14	ordinary	40.5499
ARHGAP10	CDC42	ordinary	58.2504
PDGFRB	BRK1	ordinary	16.7279
SEH1L	HSPA9	ordinary	57.7491
RPS27A	FANCM	redundant	29.5341
CALM3	TRPC1	redundant	47.3434
ITPR1	TMOD2	ordinary	158.729
SPTSSA	ACLY	ordinary	53.2165
PSMA3	NUMB	ordinary	86.0356
GNG11	NCKAP1	ordinary	37.887
ARFGAP3	COPE	ordinary	18.5982
MAT2B	GAMT	ordinary	23.2191
NUP85	FIP1L1	ordinary	75.6892
FAM20C	IGFBP7	redundant	94.9376
PREX1	RAC2	ordinary	73.3103
NUP85	KPNA5	ordinary	70.9035
CACFD1	DES	ordinary	126.048
BARD1	POLR2C	ordinary	39.4176
SMAD2	SMAD7	ordinary	50.5103
SPCS3	RPL30	ordinary	19.3357
PSMD1	ANAPC5	ordinary	37.3432
ATP6V1H	ABCC4	ordinary	17.6979
TRPC4AP	STXBP1	ordinary	53.4699
PI4K2B	CFTR	redundant	17.7018
CSF2RA	KRAS	ordinary	28.8966
AP2A1	VAMP4	ordinary	38.8051
COMMD2	UBE2F	ordinary	29.3158
PSMD10	CCNE2	redundant	37.5097
PSMA6	RBX1	redundant	40.6871
SPCS1	RPS5	ordinary	27.8752
DNA2	NHEJ1	ordinary	83.1192
CATSPERB	PRKCA	redundant	35.3413
TOP3A	PRPF19	ordinary	43.4513
NUP43	CPSF3	ordinary	205.028
PIK3R5	TFRC	redundant	28.7889
CACNB1	RAB3A	redundant	66.5331
CRLS1	BCKDHB	redundant	46.8441
PFAS	TTLL4	ordinary	132.592
NMT2	ACSL4	ordinary	70.8744
ATP6V0A1	MTAP	ordinary	55.3784
SLC25A6	WDR19	ordinary	40.2147
COMMD8	CUL5	ordinary	36.2777
BRAF	CLCN6	ordinary	41.9035
PIK3R1	VAMP3	redundant	15.4975
ETHE1	TST	ordinary	203.845
DNAJC6	SNX9	ordinary	32.3119
ATM	MDM4	redundant	209.219
SEC11C	SEC61A2	ordinary	29.6759
PPP2CB	RBL1	ordinary	85.5779
SHB	BCAR1	ordinary	85.2848
CALM1	HRAS	redundant	93.2684
RFC5	KAT5	ordinary	39.331
GPS1	LMO7	ordinary	27.3431
P2RX7	PPFIA1	ordinary	43.165
ITPR2	MYL9	ordinary	177.724
CAPZA1	FKBP4	ordinary	19.7053
UBC	XRCC2	redundant	116.152
CAMK2D	VCL	ordinary	117.331
PIP5K1B	UBC	redundant	63.151
TPR	HSPA12B	ordinary	18.6129
PIK3CD	ARPC2	redundant	36.8659
SLC25A6	GNAL	redundant	50.8282
ERCC6	H2AFX	ordinary	52.0029
CALM3	ANXA1	ordinary	19.8624
CERS2	SLC27A5	ordinary	43.9365
RPS27A	ISG15	redundant	21.2332
HLA-E	SOS1	ordinary	25.4407
RUNX1	CAMK2D	redundant	116.598
SLC25A4	ADCY7	ordinary	32.569
GPS1	RBBP5	ordinary	58.3826
AAAS	WDR33	ordinary	37.7343
NEK6	NUP50	ordinary	37.674
CD79A	RASGRP3	redundant	102.844
PIK3R6	CBL	redundant	26.6217
ORAI1	TPM1	ordinary	122.788
SOCS2	JAK1	redundant	56.2318
CTPS1	SLC25A12	ordinary	100.417
INPP5D	INPP4A	redundant	45.5923
PACSIN2	EGFR	ordinary	158.42
GNAI1	GRIN2D	redundant	223.397
TPCN1	PXN	ordinary	49.1814
SH3KBP1	ARPC5	redundant	38.8625
PKM	LDHB	ordinary	57.1595
SEC23A	TMED2	ordinary	74.5924
CAMK2D	JAK1	redundant	106.025
POU5F1	TDGF1	redundant	46.8592
PIK3CG	BTK	redundant	239.86
ATP1A3	SLC22A4	ordinary	84.7004
FAM20A	LAMC1	ordinary	60.1448
MED27	LPL	ordinary	23.7356
ITPR2	PPP3R1	ordinary	15.1669
AK3	NME4	ordinary	36.9539
PIK3R2	RAC1	redundant	15.941
TRPA1	AKAP9	redundant	104.695
LPCAT1	MORC2	redundant	92.1117
PSMB2	TNFRSF1B	ordinary	44.713
RAD50	FEN1	ordinary	61.1905
TP53	HIRA	ordinary	25.997
GNB1	ATP1B3	ordinary	51.8874
IKBKB	REL	ordinary	22.0796
DCTN3	AURKA	ordinary	78.4514
LIPT1	PDHX	ordinary	18.6038
SYNJ1	PLA2G12A	redundant	61.5779
CD79B	TRPC6	redundant	94.8048
HADHB	ACAA2	redundant	243.073
ATP2B1	TNNC2	ordinary	84.433
NUP205	FIP1L1	ordinary	89.3934
CLCN4	ANO10	ordinary	127.268
RBBP8	RPS27A	redundant	19.1457
CACFD1	CPNE7	ordinary	163.313
GMPS	GLUL	redundant	76.1819
MPHOSPH6	UTP4	ordinary	141.146
CLTB	ARPC4	ordinary	23.1137
COPS2	GAN	ordinary	15.1521
VAV2	PRKCA	ordinary	17.3368
SMS	MTAP	redundant	90.7271
PTPN11	FGF18	redundant	42.7237
VEGFA	AXL	redundant	90.5788
DENND1C	RAB8A	ordinary	141.264
P3H3	COL13A1	ordinary	35.8229
REPS1	ACTR2	ordinary	56.8664
NUP62	HSPA4	ordinary	43.305
SLC8A1	CALM1	redundant	146.753
BRIP1	FANCE	ordinary	67.4674
PSMD1	PPP2R5E	redundant	32.1822
TRPV4	ITGA1	ordinary	33.3983
GRAP2	PRKCQ	ordinary	47.4244
EPN1	ARRB1	ordinary	79.194
VAV2	RAC2	ordinary	12.8167
NUP58	HSPA4	ordinary	70.8355
EXOSC10	RPS2	redundant	54.0363
PPP1R12A	MYH9	ordinary	33.7253
STIM1	ATP2C2	ordinary	128.752
ATF4	HSPA5	ordinary	27.3161
TRPV4	STXBP1	ordinary	48.322
SEC11A	RPL23A	ordinary	13.5077
NUP43	DIAPH2	redundant	94.2792
ASB7	UBE2F	ordinary	79.502
PIP5K1B	PIK3AP1	ordinary	59.7675
SNX9	LDLRAP1	ordinary	46.829
MYO18A	CYFIP1	ordinary	34.4191
SLC3A1	SLC3A2	ordinary	93.4719
LCK	CDC42	redundant	31.2291
PDGFA	PDGFRB	ordinary	26.3118
CCNA2	ORC2	ordinary	81.0925
CRLS1	ACSF3	redundant	25.5414
VEGFA	FYN	redundant	65.6466
TRPC6	VDAC1	redundant	45.7548
PDGFRA	PLCG1	ordinary	61.5333
H2AFX	HIST1H3H	ordinary	35.3127
COPS6	SOCS3	ordinary	28.6857
DCTN1	HSP90AB1	ordinary	124.848
KITLG	SYK	redundant	33.0883
NRG1	FCGR3A	ordinary	35.6454
PIK3CG	ITK	redundant	191.7
TFDP2	CDC6	redundant	64.872
PIK3CB	REPS1	ordinary	67.7264
CTSV	HLA-DQA1	redundant	41.7834
PDGFA	FGFR4	redundant	29.1074
CBL	EPS15	redundant	106.241
FBP1	PFKFB2	ordinary	15.1136
SLC4A7	RUNX1	redundant	147.164
ATP1A1	ABCC9	ordinary	40.8621
PIK3R2	LCP2	redundant	30.4885
ARFGAP3	CD55	ordinary	98.5709
CLTB	ACTR3	ordinary	25.6944
PSMC4	ANAPC15	ordinary	24.441
TSC2	LAMTOR3	ordinary	58.1189
HIST1H2BD	NCAPD3	ordinary	80.8712
ASNA1	SEC61A1	ordinary	22.8302
CACNB1	DMD	ordinary	126.149
ATP1A1	GNG5	ordinary	21.741
EXOSC5	WDR46	ordinary	147.454
EME1	EXO1	ordinary	214.338
ASXL1	HIST3H2A	ordinary	90.6646
DNA2	UBA52	redundant	84.9975
CPT1A	ACSS2	ordinary	170.806
ARHGAP42	RHOF	ordinary	80.5299
RPS24	RCL1	ordinary	126.011
ASIC1	SLC9A6	ordinary	56.3513
ELL	XAB2	ordinary	73.1008
GALNT18	MUC20	ordinary	13.5214
RBBP4	MEAF6	ordinary	107.818
ARPC5	WNT5A	ordinary	36.1866
PSMD10	TNFSF14	ordinary	23.4013
FGF2	TEC	ordinary	39.1849
SLC3A2	GRIN1	redundant	65.9869
RAC2	RHOB	ordinary	12.7967
NUP107	GEMIN4	ordinary	89.055
PSME1	CKS1B	ordinary	64.3536
INPPL1	SLC2A8	redundant	46.3812
SUPT5H	NELFE	redundant	15.7623
SLC22A5	SLC4A4	ordinary	501.984
COPS2	KEAP1	redundant	55.7678
GABPB1	GABPA	ordinary	111.399
AKT3	MDM2	redundant	36.6838
UBA6	UBC	ordinary	34.5494
CACNB2	ACTA2	ordinary	85.0591
CCND1	E2F5	ordinary	155.923
ABL1	WASF3	redundant	47.4683
GAB2	PLCG1	ordinary	60.553
ITPR1	ITGB5	ordinary	62.7452
SRI	TLN1	ordinary	167.569
ARHGAP11B	RHOV	ordinary	31.6645
GRB2	WASF3	redundant	27.5878
GGT6	GRM8	ordinary	72.7107
SH3GL1	INPP4A	ordinary	37.6882
GBF1	COPB2	ordinary	34.2361
GPSM3	BDKRB2	ordinary	75.5254
ESPL1	NUP43	ordinary	112.237
ACAT2	HMGCS1	critical	71.2389
SLC6A20	GRIN2D	ordinary	179.001
PIK3R6	PLCG1	redundant	43.5001
PRKACB	GLI2	redundant	85.7713
PIK3CB	EPS15	redundant	109.378
ARHGAP30	RHOV	ordinary	27.4351
BARD1	MAD2L2	ordinary	80.222
SUPT4H1	TAF6	ordinary	19.9927
CLOCK	PER2	redundant	21.8268
CD3G	FGFR1OP2	ordinary	36.4446
ARHGEF3	RHOQ	ordinary	24.4658
CSK	CD4	redundant	26.9191
USP2	RNF31	ordinary	344.138
ATP2B4	DYSF	ordinary	179.06
ANO1	SLC6A12	ordinary	22.6435
PIK3R2	AP2B1	ordinary	20.0659
ATP1A1	KCNQ3	ordinary	18.036
CATSPER2	GNAI2	redundant	16.4124
NSMCE1	SUMO1	ordinary	20.6656
NUP155	HNRNPC	ordinary	71.8618
CACNA2D1	RASGRF2	ordinary	86.8638
PIK3CA	SNX9	ordinary	51.882
SRC	KIAA1549	ordinary	141.515
CDK1	MAD2L1	ordinary	324.446
CA2	PAICS	ordinary	390.415
GAB2	CD28	ordinary	42.7641
CD79B	CALM3	redundant	79.7084
PTPN3	SH3GL1	ordinary	26.5617
DAB2	EGFR	ordinary	32.802
APP	STX1A	ordinary	57.2922
ITGA2	PTK2	ordinary	76.4504
WNT5A	PIP5K1A	ordinary	47.663
NUP85	AURKB	ordinary	127.083
MAT2A	PRMT3	ordinary	82.8795
TOP3A	LIG3	ordinary	35.0653
CHML	RAB3A	redundant	24.0017
ATR	CCAR2	ordinary	45.143
SLC22A4	ATP1A3	ordinary	84.7004
POLR2H	ERCC6	ordinary	45.2569
CARM1	HMGCR	redundant	29.5845
AGPAT3	PLA2G4A	redundant	19.7517
GPS2	HIST1H2BD	ordinary	13.0677
NEURL1	UBB	ordinary	36.4525
STAT3	MMP3	ordinary	78.3334
SLC7A11	SLC1A3	redundant	71.0527
PPARA	ACSL1	redundant	30.2751
SLC3A2	CAMK2G	redundant	136.365
SCN8A	ATP1A1	ordinary	20.093
PPP2CB	ARAF	ordinary	49.8401
BARD1	CHEK1	redundant	185.065
TSC2	MLST8	ordinary	70.2573
SLC12A2	KCNK1	ordinary	48.8454
ARHGEF1	RHOA	ordinary	36.8956
TRPM7	UNC13B	ordinary	21.7478
IRAK1	FYN	redundant	56.8601
FANCA	FANCM	ordinary	110.917
PPA1	PYGB	ordinary	74.3829
CLTA	ARPC1B	redundant	27.7401
TBP	TP53	ordinary	21.4573
POLD4	RPA3	ordinary	99.5025
RANBP2	DDX20	ordinary	52.0506
PLCD1	SYNJ1	ordinary	268.643
RRP8	H2AFJ	ordinary	16.2756
EP300	ANGPTL4	redundant	14.1107
COPS3	CUL4A	redundant	52.5645
RRAGB	SLC7A6	ordinary	60.1725
UBE2D1	CD14	ordinary	20.0746
PSMC2	KLHL12	ordinary	42.9699
FGFR4	RAC1	ordinary	31.0056
PIK3R6	BRK1	redundant	14.6834
COPS7B	FBXL7	redundant	99.1447
ARID4A	HIST1H2BD	ordinary	25.6617
SLC37A1	G6PC3	ordinary	36.2309
RNF40	UBE2A	ordinary	27.1424
COPS7A	DCUN1D1	ordinary	22.6292
PDE1C	AK2	ordinary	60.3643
XRN1	LSM5	ordinary	43.2524
AP2S1	VAMP2	ordinary	114.982
TALDO1	PFKFB2	ordinary	40.3286
ATP1A1	SLC22A15	ordinary	50.7642
PSMD7	FZR1	redundant	30.7392
PSMB9	CUL3	ordinary	17.698
GNG2	ITPR1	ordinary	341.146
C1D	RRP7A	ordinary	20.4486
NCL	NOC4L	ordinary	81.5151
TACO1	CYCS	ordinary	22.101
UIMC1	BARD1	ordinary	64.3687
FGFR1OP	CD3G	ordinary	34.7279
PIP4K2C	RAP1A	redundant	127.295
PDZD11	ATP1B3	redundant	76.9468
INHBB	ACVR1C	ordinary	54.6666
MED19	CD36	ordinary	73.4452
EXOSC4	UTP14C	ordinary	90.9113
JAK2	STAT5A	redundant	27.5168
MMP7	LAMA3	ordinary	97.8036
GTF2F1	MDC1	ordinary	23.3218
STON1	PIP5K1C	ordinary	82.6053
SPTBN5	COPA	ordinary	52.9015
CCND2	E2F5	ordinary	65.1609
ARHGAP35	RASA1	ordinary	59.1762
SLC4A2	ANO1	ordinary	46.5789
SLC5A9	SLC9A8	redundant	15.7988
ATG7	MAP2K2	ordinary	30.1882
ARRB2	TGOLN2	ordinary	21.9974
CHD9	TRIB3	ordinary	167.32
CAMK2G	NEB	ordinary	108.866
COPS4	FBXO2	ordinary	21.6149
STON2	PTPN13	ordinary	22.6292
SLC25A16	DLST	ordinary	28.4321
PDPN	DGKG	ordinary	36.3068
CEP250	AURKA	ordinary	133.375
DVL3	EZR	ordinary	23.7975
TLR4	MAP3K7	ordinary	19.4753
ASB13	UBE2F	ordinary	32.4105
CD4	PLEKHA2	ordinary	28.3026
ARL2BP	ATP6V1A	ordinary	22.8227
ITPR2	TNNC2	ordinary	14.0067
CALM1	ATP1A1	redundant	103.797
CLIC2	ACTA2	ordinary	105.486
BAG4	INPP5D	redundant	43.3423
DYNC1LI1	HLA-DRB5	ordinary	14.2636
CPSF6	PLCG2	ordinary	111.025
PLCG2	RAC1	ordinary	82.8774
SRSF10	YBX1	ordinary	28.8172
CEP78	AJUBA	ordinary	262.388
CD3D	PIP5K1B	ordinary	68.1402
B4GALT7	SDC3	ordinary	28.3683
BLM	EP300	redundant	70.7927
EGFR	CD28	redundant	45.8467
MAP3K11	NRAS	ordinary	45.0615
SPCS2	RPL12	ordinary	38.942
ABCA2	LCAT	ordinary	50.1843
SLC6A6	GABRA2	ordinary	91.8739
HSP90AA1	AURKA	redundant	108.882
PLD1	PITPNM2	ordinary	74.9741
TRPC4AP	CACNB3	redundant	25.5847
SYDE2	RHOH	ordinary	23.3711
NUP214	SNRPF	ordinary	64.953
PIP4K2A	CLTC	ordinary	33.9888
PIP5K1A	GNG12	ordinary	92.2526
PDZD11	FXYD6	redundant	117.696
GNAI3	PDE4C	ordinary	13.5544
TRPC4AP	GNAI2	redundant	25.0621
GRB2	RAC1	redundant	21.8532
CDK11B	CEP164	ordinary	60.4903
MAP3K7	MAP2K3	ordinary	17.3872
SH3GL1	VAMP3	ordinary	33.3131
RMI2	POLR2J	ordinary	37.6486
DYNLL1	RAB8A	ordinary	43.5786
CLTCL1	VAMP3	ordinary	20.7318
PSMF1	TNFRSF12A	ordinary	109.665
GUK1	ATP6V1G1	ordinary	33.6524
ITSN2	ARPC1A	ordinary	34.3525
SLC20A1	SLC9A8	ordinary	175.759
NUP43	KPNA2	ordinary	158.718
GSK3B	POLR2H	ordinary	43.977
PIP5K1C	SH3KBP1	redundant	51.7691
CCZ1B	GDI2	ordinary	24.6452
TRPV3	SLC24A3	ordinary	133.605
NME4	NADK2	ordinary	33.7609
NBN	NEIL2	ordinary	33.1376
SLC8B1	MCOLN3	ordinary	24.5517
PDGFA	FGF2	redundant	32.6559
FXYD6	CAMK2D	redundant	148.467
INPP5K	PIK3CD	ordinary	56.7685
IRAK4	WASF2	redundant	32.5558
SH3KBP1	CALM1	redundant	122.709
ARHGAP12	RHOT2	ordinary	47.0373
ORMDL3	ACLY	ordinary	50.5489
PSMD14	NUMB	ordinary	135.795
TFPT	COPS7B	ordinary	56.6165
P2RX1	GRIN2D	redundant	267.016
POLE2	BRIP1	ordinary	121.271
CALM2	PDE4D	ordinary	69.9421
NRG1	BCR	ordinary	34.478
RAMP3	GNAS	ordinary	13.7425
RUVBL1	HIST1H2BN	ordinary	132.22
PLD4	OCRL	redundant	21.0941
DDB1	UBE2M	ordinary	23.5093
SLC22A5	ATP1B3	ordinary	337.546
TGS1	HMGCS1	redundant	59.2181
CTSA	GLB1	ordinary	38.6101
CACNB3	SORBS3	ordinary	34.2424
SLC9A1	GRIN1	ordinary	92.6496
HLA-DPA1	ZAP70	ordinary	64.4822
ASIC1	ATP1A1	ordinary	62.563
ARHGEF18	RAC1	ordinary	92.7044
PLA2G6	CAPZA1	ordinary	27.4834
ACSS2	GNPNAT1	ordinary	72.0694
GNB5	WASF2	ordinary	40.5065
PSMA4	PPP2R5E	redundant	34.2573
RNF111	GTF2H5	ordinary	15.4802
ARHGEF16	RHOB	ordinary	13.707
SYNJ2	EPS15	redundant	47.8632
TGFBR1	SMAD3	ordinary	17.0012
ANO8	SLC6A12	ordinary	24.1673
CACNB3	MYL6B	ordinary	25.5709
PIAS1	SP3	ordinary	126.353
PLA2G4A	AGPAT3	ordinary	19.7517
ARHGEF15	RHOG	ordinary	13.8006
CACNB1	PYGL	redundant	63.9775
PI4K2B	CD3D	redundant	20.4771
NECAP1	INPP4B	ordinary	14.3129
CTSS	TLR7	redundant	138.469
CALM3	TRPV4	ordinary	41.8253
ARHGEF6	RHOH	ordinary	190.025
PLCD1	DAGLA	ordinary	240.193
PSMD8	BUB1B	ordinary	64.2604
TRPC6	SRI	ordinary	136.169
NUP93	NXF1	ordinary	79.3439
F5	SEC24A	redundant	27.8594
CDC42	PPP2R5D	redundant	33.7865
CUX1	LCP2	ordinary	15.0871
AKR1B1	SORD	ordinary	82.0845
HMGCR	MORC2	ordinary	71.4116
NUP153	GEMIN6	ordinary	33.4226
SEC11C	RPS7	ordinary	27.9846
GPD1L	GPAT4	ordinary	172.363
TPCN1	STXBP1	ordinary	36.0286
RAI1	CLOCK	ordinary	19.6045
ATP1A1	SLC5A6	ordinary	88.0812
ERCC2	POLR2L	ordinary	86.8687
GLCE	GPC6	ordinary	27.2613
PSMD9	ANAPC7	ordinary	92.1963
ATP6V1D	DTYMK	ordinary	90.3748
TRPM7	SRI	ordinary	110.97
CALM1	RASGRP4	redundant	121.741
PRDX6	GSR	ordinary	199.946
CBL	WNT5A	redundant	61.4169
GNPAT	ACLY	ordinary	49.7049
GNB2	NCKAP1L	ordinary	40.041
ARPC2	FZD4	ordinary	38.8188
SLC9A2	DLG4	ordinary	79.2957
CAD	VAMP2	redundant	175.82
PSMD8	TNFSF11	ordinary	41.336
PSMB4	RELA	redundant	20.7891
CAMK2D	ATP1A1	redundant	57.3305
TRPM7	RASGRF2	ordinary	28.0107
PSMC3	CDC16	ordinary	46.9684
DNAJB6	HSPA12B	ordinary	12.9535
CPLX1	RAB3A	redundant	52.8597
DIAPH2	DSN1	ordinary	88.2553
STON1	SYT1	ordinary	55.0745
PSMD10	NUMB	ordinary	73.1685
GCLM	GGCT	ordinary	63.8424
PSMC5	SPOP	ordinary	34.394
ATM	GTF2H3	ordinary	36.6059
BRAF	MPRIP	ordinary	25.5656
RFC4	PALB2	ordinary	188.021
CREBBP	GRHL1	ordinary	70.1002
ADCY9	PRKAR2B	ordinary	172.063
SOS1	VAV1	redundant	34.1008
CERS6	ATAT1	ordinary	45.1536
ARFGAP1	KDELR2	ordinary	47.0069
UBE2V1	NOD2	ordinary	60.0584
HIST2H2BE	NCAPG2	ordinary	94.2599
TRPA1	SLC24A1	ordinary	23.796
POLR2C	NELFE	ordinary	77.8513
SLC24A1	TRPV3	ordinary	138.245
GNG12	AKT2	ordinary	119.657
PSME4	CUL5	redundant	142.986
RPS11	BMS1	ordinary	69.6549
NCL	NOL6	ordinary	136.607
SLC24A3	MCOLN2	ordinary	46.9539
ARHGEF17	RHOA	ordinary	13.3705
ARHGAP19	RAC2	ordinary	13.9042
NUP107	HSPA5	ordinary	78.574
CALM3	ATP2C2	ordinary	24.7885
PSMB6	CCNE2	redundant	36.8405
EXOSC2	GMPR	redundant	109.395
NIP7	NOL6	ordinary	123.707
PPAT	SLC3A2	redundant	147.503
SUCLG1	DLD	ordinary	65.0207
NUP54	GEMIN4	ordinary	32.5244
RHNO1	RPA2	ordinary	25.4648
VAMP2	GRIN2B	redundant	157.008
MND1	RPA1	ordinary	56.3315
BCR	RHOBTB2	ordinary	17.1015
SLC22A4	SLC9A6	ordinary	90.2712
CTSA	HLA-DPB1	ordinary	29.7384
DPAGT1	ALG14	ordinary	37.7278
WNT5A	DVL2	ordinary	31.7575
L2HGDH	AADAT	ordinary	62.3103
ARHGAP11B	CDC42	ordinary	52.5659
AGO2	NOTCH2	ordinary	72.8075
ARHGEF18	RHOBTB2	ordinary	103.787
POLD4	TOP3A	ordinary	74.7136
SRSF10	HNRNPA0	ordinary	29.571
CACNB3	TMOD1	ordinary	99.1706
CACNB3	ATP2A3	ordinary	59.763
PI4K2B	VAMP3	redundant	62.4743
PMPCA	HSPA9	ordinary	50.665
AKAP1	DMD	ordinary	71.5449
SBF2	PPP2R5A	redundant	22.2544
GRIN1	TMOD2	ordinary	25.5772
GGT7	CALM1	redundant	101.903
FGFR1OP2	FCGR3A	ordinary	26.0558
TREM2	CUX1	ordinary	18.0141
NRAS	VCL	ordinary	60.3107
BCR	FGFR2	ordinary	85.5607
DNAJC6	AP1S1	ordinary	34.3993
GNB1	ITPKA	ordinary	42.9751
CTH	ORMDL1	ordinary	21.4451
ADCY6	PDE11A	ordinary	52.9982
CA7	ATP6V1H	ordinary	347.23
ACSL5	ZDHHC2	ordinary	15.4597
ALG10	STT3A	ordinary	46.7612
CALM2	CLCA4	ordinary	170.378
RACGAP1	RHOA	ordinary	109.744
PSMC5	GSK3B	redundant	32.4027
GNA11	DAGLB	ordinary	214.608
SLC24A3	ATP2B4	ordinary	225.715
SAP30	H3F3B	ordinary	23.1803
KAT2A	TBP	ordinary	114.454
TRPV3	PRKCA	redundant	139.757
CCND3	E2F3	ordinary	67.9675
FGF2	CD247	ordinary	50.4366
IRS2	GRAP2	ordinary	33.7839
POLE3	WRN	ordinary	33.7908
INPP5D	NECAP2	ordinary	29.9329
HLA-E	VAV3	ordinary	32.1739
CDK4	E2F2	ordinary	89.6639
CD3G	BTK	ordinary	193.08
ERBB2	TRIM24	ordinary	27.9414
SUZ12	H2AFV	ordinary	21.4714
MSL1	HIST1H4I	ordinary	14.3296
ARHGAP44	RHOA	ordinary	123.923
SLC1A5	CTPS1	ordinary	116.466
ST6GALNAC3	MUC4	ordinary	45.2557
RABGGTB	RAB13	redundant	28.4777
CACNB3	VDAC1	redundant	15.2123
LYN	LCP2	redundant	63.7425
PDGFRB	WASF1	ordinary	23.2344
APP	PPP3CA	ordinary	13.7653
RIOK3	RPS5	ordinary	148.907
NCOA2	HMGCR	redundant	23.9148
JAK2	MAPK3	redundant	57.6544
ESPL1	CENPP	ordinary	120.975
PSMD5	TNFRSF12A	ordinary	117.513
RNF4	UIMC1	ordinary	30.1155
GNAI1	NCALD	ordinary	64.7479
DVL1	ICOS	ordinary	35.6129
SEC11C	RPL12	ordinary	42.8162
CYLD	TAB2	ordinary	182.687
PIP5K1B	BTK	redundant	97.1188
ATP1A1	HCN3	ordinary	23.0536
FAR2	ACAA1	ordinary	77.2186
MTMR3	PPP2R5D	redundant	51.6486
PSMB9	ANAPC7	ordinary	91.8517
KIFAP3	ACTR1A	ordinary	59.1429
PIK3CD	CYFIP2	redundant	24.5498
CACNA1D	CD209	ordinary	124.919
PSME3	AJUBA	redundant	250.606
EZH2	H3F3B	ordinary	93.3894
DVL2	NCK1	ordinary	37.5978
CAMK2G	MDM2	redundant	86.1946
BTC	FYN	ordinary	31.0938
FAM20C	IL6	redundant	30.6989
SLC24A1	GRIN2B	redundant	84.1456
PIP5K1C	PDGFRB	redundant	80.1614
TPR	HSPA4L	ordinary	32.2966
RAP1GAP	RAP1A	ordinary	112.175
CD19	FCGR1A	ordinary	50.5517
GNG2	FGF18	ordinary	154.841
USP2	TNF	redundant	354.376
FGFR4	FCGR2A	ordinary	47.6981
HSPA8	SNX9	ordinary	45.2785
STIM1	ANXA1	ordinary	140.123
ARHGAP17	RHOF	ordinary	104.371
ADAM9	COL17A1	ordinary	25.2636
AGPAT1	LPIN3	ordinary	22.5337
ALS2	GDI2	ordinary	25.626
HLA-E	CNTRL	ordinary	21.1044
GNB4	NCKAP1	ordinary	57.0354
PRKAB2	RRAGD	ordinary	32.5939
DCAF6	CUL4B	ordinary	55.8087
NDC1	SNUPN	ordinary	38.8028
HIST1H2BK	KDM4A	ordinary	55.6634
UBE2D1	SMAD3	ordinary	13.0472
NFYC	GGPS1	redundant	30.4177
CHMP6	UBB	ordinary	66.0943
PSMC4	RELA	redundant	13.3709
SLC4A8	BEST1	ordinary	24.8772
SEH1L	SNRPD3	ordinary	41.4571
PIK3CA	FCHO1	ordinary	35.7186
AAAS	RAN	redundant	136.392
POLR2J	NELFE	ordinary	51.3776
NAA35	ATAT1	ordinary	39.1604
DVL1	PPP2R5E	redundant	70.8486
FGFR4	CYFIP2	ordinary	30.5288
AKAP1	NFATC1	redundant	26.6962
P2RX7	PPP3CA	ordinary	34.4168
PIP5K1C	FYN	redundant	41.3108
RRAGB	IARS	ordinary	88.3708
PTPN11	BAG4	redundant	44.294
P2RX5	CACNB2	redundant	40.1016
ATP6V1C1	PYGL	ordinary	13.0046
TFDP1	SUZ12	redundant	69.8438
AP2A1	ROR2	ordinary	17.0469
SLC38A5	SLC4A7	ordinary	36.3114
AGBL3	VAMP2	redundant	98.6609
TGOLN2	PIP5K1B	ordinary	80.9971
EXOSC8	DDX49	ordinary	74.078
NME1	ATP6V1A	ordinary	92.0793
GNAI2	ITPKA	redundant	37.1436
SYNJ2	CD4	redundant	25.6073
EXO1	POLK	ordinary	76.1112
TRIO	RHOQ	ordinary	43.7719
EPS15L1	ARPC5	ordinary	15.1936
PIP5K1C	CBLB	ordinary	18.7778
MPC2	PDHA1	ordinary	20.3301
MYH15	EXOC3	ordinary	67.3648
KAT5	CHEK1	redundant	69.5535
PIP5K1A	NTN1	ordinary	145.659
CHM	RAB1B	redundant	73.8289
EPHB1	EFNB2	ordinary	13.6317
DNA2	FEN1	ordinary	119.116
PEBP1	TRIM24	redundant	28.0655
ESPL1	WAPL	ordinary	47.6015
SPRED3	HRAS	redundant	37.9394
CHCHD4	CMC2	ordinary	52.3212
SUV39H1	HIST1H2BN	ordinary	61.2014
POLR2D	MDC1	ordinary	116.714
ARHGAP25	RHOT1	ordinary	39.7496
AAK1	SLC2A8	ordinary	31.1474
INPP5D	GRB2	redundant	55.2711
EFNA3	RHOA	ordinary	45.8786
PIK3C2B	EPS15	redundant	12.6429
ST3GAL6	SLC35A1	ordinary	27.3843
PSMC1	BUB3	ordinary	71.5872
TRPC4AP	MYH11	ordinary	195.616
CACNA1C	CPLX1	ordinary	45.4246
ACTR2	IGF2R	ordinary	30.4063
PSMC3IP	HIST1H4I	ordinary	36.8079
ACOT2	ACAT1	ordinary	100.637
PSMA3	PPP2R5E	redundant	83.715
EIF5	EIF4E	redundant	53.1843
CACNA1D	ACTA2	ordinary	65.4993
SLC38A2	ASNS	ordinary	56.7059
EXOSC2	UTP3	ordinary	107.216
DENND1B	RAB35	ordinary	48.7255
PSMA7	WTIP	ordinary	48.0486
WRN	PARP1	redundant	29.6924
PPP1CB	PER1	redundant	91.4346
STAT4	TALDO1	redundant	65.8311
NUP107	PHAX	ordinary	99.9293
PSMB9	NUMB	ordinary	67.5148
CCNB2	PPP2R5B	redundant	68.247
GRIN1	LMOD1	ordinary	149.835
PSMB6	RPS27A	redundant	18.7118
C1QC	C2	ordinary	63.4525
CATSPERG	MYL5	ordinary	32.2867
NDC1	HDAC4	ordinary	50.7249
SUV39H1	HIST1H2BJ	ordinary	60.5728
ARHGAP18	CDC42	ordinary	68.2657
IRS1	FGF2	ordinary	68.7602
2020-09-02	HAUS7	ordinary	57.9808
PSMA6	NPEPPS	ordinary	21.3697
LGMN	HLA-DRB1	redundant	72.8479
SPCS1	SSR1	ordinary	29.7514
PIP5K1B	CD86	redundant	60.5837
HDAC2	H2AFJ	ordinary	50.9841
FXYD6	SRI	ordinary	212.508
GABPA	POLG2	ordinary	59.7794
PSME2	GLI3	redundant	46.0257
CATSPERB	VCL	ordinary	59.4308
ACSS2	HMGCS1	redundant	56.3892
CD79B	DAPP1	ordinary	81.3452
GSS	GSTM3	ordinary	22.3498
KIF15	HLA-DPB1	ordinary	43.8179
LIAS	MARS2	critical	43.0198
SKP1	AURKA	ordinary	84.6214
MAPK1	L1CAM	redundant	32.6693
ARHGEF39	RHOA	ordinary	54.0488
FGF2	LCK	ordinary	30.5518
FGFR1	INPP5K	ordinary	60.9707
CAMK2D	NFATC3	redundant	63.2743
ZMYM2	BAIAP2	ordinary	31.5935
SRI	LMOD1	ordinary	255.031
BLM	FAAP24	ordinary	95.0742
PIK3R5	SH3KBP1	redundant	51.9895
RAB3GAP1	BICD2	ordinary	41.1084
MMP3	COL9A3	ordinary	86.8821
CRTAP	COL1A2	ordinary	25.917
ORAI1	PPFIA1	ordinary	37.5068
PPAT	GCLM	ordinary	144.213
ARFGAP1	RAB1A	redundant	76.5004
SRM	SAT1	redundant	57.0147
PYGO1	H2AFZ	ordinary	52.4667
CCNB2	CENPL	ordinary	143.693
MOGAT2	ACSL3	ordinary	94.4867
LAMA2	HGF	ordinary	57.3402
PSMB3	CDC27	ordinary	35.1204
XRCC1	UBC	redundant	22.5632
PIP4K2C	PDGFRB	redundant	28.181
P2RX7	GRIN1	redundant	13.7047
ATP2B1	TLN1	ordinary	101.627
GGT6	NCALD	ordinary	54.3347
ACLY	FASN	redundant	131.334
CUX1	RHOA	ordinary	22.1495
TNFAIP3	RNF31	ordinary	16.246
ASPH	ANXA6	ordinary	25.5907
KITLG	FGF7	redundant	59.8191
NBN	FANCD2	redundant	96.8348
MTMR3	PITPNM3	ordinary	101.426
TRAF6	NCKAP1	redundant	68.0444
SPCS1	SEC61B	ordinary	44.4635
PSME4	TRAF2	redundant	62.6812
EED	H3F3A	ordinary	16.7479
USP1	FANCM	redundant	128.439
IDH3G	AADAT	ordinary	39.7345
BRCA1	UBE2I	redundant	102.587
GSK3B	TAF1A	redundant	98.3032
LCK	PDCD1	redundant	16.8396
FAM13B	RHOB	ordinary	61.0552
TRAPPC13	RAB1B	ordinary	78.1061
ATP1A3	CNGA1	ordinary	46.6335
AGPAT3	PLA2G6	redundant	32.4751
CAPN1	CDH1	ordinary	13.7028
CNGA1	PYGL	redundant	44.2633
PIP5K1B	KIAA0319	redundant	63.3561
ICOS	FGFR1OP	ordinary	22.7278
PPARG	PCK1	ordinary	98.8414
CCDC22	UBE2F	ordinary	23.4809
TRPC1	PXN	ordinary	31.8375
CASP6	VIM	ordinary	36.8837
PIK3CA	PACSIN3	ordinary	18.6375
BOP1	UTP3	ordinary	72.1379
NBN	RPA3	redundant	48.5664
HADHB	CS	redundant	130.528
PIK3R2	AP2M1	redundant	19.4093
GPSM1	CXCL5	ordinary	35.2363
BTC	SOS1	ordinary	53.4272
PSMC3	BIRC3	redundant	14.8216
PRKCE	SHC1	ordinary	47.0294
PSMA5	FBXL7	redundant	89.2327
POLR2K	HIST1H4I	ordinary	18.7459
MCRS1	COPS2	ordinary	39.3833
ITPR1	RASGRF2	ordinary	81.5262
CALM2	NFATC3	redundant	31.8254
GALNT15	MUC12	ordinary	69.1506
PSME3	LTB	ordinary	45.5854
SUMF2	ARSJ	ordinary	23.1688
PSMA3	OAZ1	ordinary	22.4233
EXOSC6	NOP14	ordinary	92.1951
FAM20C	SDC2	redundant	84.0744
SLC7A6	GRIN2B	ordinary	133.94
PAFAH1B1	DYNC1H1	ordinary	89.5303
DVL2	LDLRAP1	redundant	21.9046
SULT1C2	BPNT1	ordinary	64.848
CPT1A	ACSL6	ordinary	151.154
RPS11	RRP7A	ordinary	34.7615
SNX18	EGFR	ordinary	46.2623
ALG3	ALG9	ordinary	58.4796
ELOVL7	HSD17B12	ordinary	33.9583
RABGGTB	RAB27B	ordinary	29.634
MMP15	NID1	ordinary	32.4741
ECT2	RHOV	ordinary	86.9936
AGPAT2	ACSL5	ordinary	13.6848
RPS13	TBL3	ordinary	36.1959
BARD1	MNAT1	ordinary	83.1004
CAMK2G	GNAI1	redundant	132.289
RAD51C	RAD51	ordinary	64.6411
AGPAT5	LPIN1	redundant	24.2951
ARRB1	VAMP2	ordinary	159.176
DNAJB1	HSPA2	ordinary	44.4133
TPCN2	ACTG2	ordinary	168.68
CEL	LCAT	ordinary	50.1117
CALM2	P2RX4	ordinary	109.213
HLA-E	MYO18A	ordinary	31.4525
PIP5K1A	PIK3AP1	ordinary	17.9032
TOMM5	PINK1	redundant	157.537
RUNX3	TEAD4	ordinary	131.105
PTK6	KHDRBS3	ordinary	23.8338
PSMD13	SPOPL	ordinary	38.8491
COPS6	ASB6	ordinary	43.622
ACOT1	AACS	ordinary	15.2647
MYO9B	RAC1	ordinary	17.4329
PLCD4	DGAT2	ordinary	152.163
GNAI1	STIM1	ordinary	182.862
SRGAP2	RHOG	ordinary	18.0633
CATSPER2	SLC8B1	redundant	22.5024
ARRB2	CD3G	ordinary	26.8165
KCNN3	ATP1A3	ordinary	133.395
PPP1CB	CRY1	ordinary	82.3055
GNG2	FGFR3	ordinary	129.748
CALM3	PDE4A	ordinary	20.1986
BRCA1	POLH	ordinary	80.9316
GAB2	LCK	ordinary	26.0696
RPS27A	INPP4B	redundant	26.5144
DMAP1	HIST3H2A	ordinary	46.1966
PSMC4	CUL1	redundant	33.1275
NEDD8	UBE2M	ordinary	41.185
TNKS2	AXIN1	ordinary	31.2185
UBE2N	TLR4	redundant	17.1207
PIP5K1A	PLCE1	ordinary	204.875
MAP2K2	KDM7A	ordinary	36.3293
MYD88	FGFR4	ordinary	46.9113
DCTN1	NR3C1	ordinary	98.7353
COASY	ACSL4	ordinary	51.6435
CALM1	INPP5D	redundant	125.852
VPS4A	PPIA	redundant	42.0432
CLTA	IGF2R	redundant	49.9571
PIK3CA	INPP4B	redundant	138.765
HGF	TEC	ordinary	16.7949
PRMT5	H2AFX	redundant	71.5651
NUP85	GEMIN2	ordinary	91.0285
GMPR	ADSSL1	ordinary	16.6227
ATP1A1	GNB2	ordinary	20.4355
SLC6A20	ATP1A3	ordinary	21.8979
HDAC2	HIST1H2BJ	ordinary	62.022
P3H2	COL9A1	ordinary	52.4893
ST3GAL2	MUC12	ordinary	53.4565
ARHGEF35	RHOJ	ordinary	28.8109
PSMD7	CDC20	ordinary	61.487
CACNA2D1	ATP2C1	ordinary	78.9935
CAMK2D	IFNGR2	ordinary	57.3404
EXOSC8	EMG1	ordinary	85.8575
CFB	C5	ordinary	26.7777
TRPM7	SYT1	redundant	16.0311
CCNB1	AHCTF1	ordinary	76.3575
PRKAG2	LAMTOR1	ordinary	24.3372
COPS7B	KLHL2	ordinary	54.8305
RHOB	MYH11	ordinary	192.627
FOLH1	TTLL7	ordinary	38.2825
FGFR3	ITK	ordinary	15.1209
CNDP2	TTLL3	ordinary	29.7217
CYBRD1	CP	redundant	113.28
CTSC	HLA-DRA	ordinary	55.5832
PPP2R1A	MARK3	ordinary	20.7529
HMOX1	BLVRB	redundant	100.237
PIK3CA	ACTR3	redundant	61.8547
RBX1	HIF3A	redundant	57.5399
TRPC6	ATP2A2	ordinary	44.4324
CD79A	ITPR3	redundant	60.2034
ITPR2	MYH11	ordinary	178.363
CAMK2D	ACTG2	ordinary	208.501
FGF2	INPPL1	ordinary	40.9822
PIP4K2C	PIK3C3	redundant	33.7065
XRCC1	RFC5	ordinary	57.728
PIP4K2B	TEC	redundant	12.7619
CPSF6	GRAP2	ordinary	57.754
STON2	ARPC4	ordinary	21.2526
GNAI2	STIM1	ordinary	161.07
LDLR	CD3G	ordinary	26.282
GLA	GLB1	ordinary	58.5901
ATP6V0A1	SLC25A10	ordinary	26.5513
UBA52	CD3D	redundant	34.2269
ITPR3	CPLX1	ordinary	29.4157
AK7	GNAL	redundant	42.6393
MAP2K4	MAPK8	redundant	100.165
MID1IP1	ELOVL5	redundant	71.9589
PIP5K1B	MTMR1	ordinary	82.0565
GNG11	SYNJ1	ordinary	85.3676
B4GALT5	MUC5AC	ordinary	25.7748
GCAT	GARS	ordinary	111.367
CACNB2	STX1A	ordinary	91.4673
AKT1	RPTOR	ordinary	35.595
HSP90AA1	BAG4	redundant	54.6523
ENPP1	ACP5	critical	41.7994
HSP90AA1	TDRKH	ordinary	48.2856
CATSPERB	TMOD1	ordinary	101.742
SKIV2L2	DIEXF	ordinary	112.531
TTF1	HIST1H2AE	ordinary	16.9738
COPS4	DCAF16	ordinary	26.9177
BCR	CYFIP2	ordinary	14.0146
UBB	BRCA1	redundant	85.4428
RPS5	RCL1	ordinary	106.016
P2RX5	MYL12B	ordinary	17.7941
NUPL2	CPSF2	ordinary	55.4874
DVL1	FGF2	redundant	56.7957
PDGFRA	FGFR1	ordinary	134.009
NUP88	GEMIN7	ordinary	41.7727
CACNB2	CLCA4	ordinary	185.804
TGS1	SLC27A1	ordinary	75.3919
P4HA2	COL5A1	ordinary	30.7412
TREM2	PDPK1	ordinary	21.7165
DVL3	LAT2	redundant	18.7125
NADK	SLC25A6	ordinary	31.8783
TRIM24	FGF18	ordinary	61.2193
ARFGAP3	TMED10	ordinary	68.9075
TRPV4	NFATC1	redundant	48.6682
CASP3	GAS2	ordinary	44.9078
DVL3	CTNNB1	redundant	30.9455
CATSPERG	RASGRP1	redundant	42.7134
LEF1	HIST1H3H	ordinary	51.6674
P2RX1	SLC8B1	redundant	137.368
NDC80	STAG2	ordinary	30.981
CDK11A	PAFAH1B1	ordinary	64.7487
SLC1A1	LRRC49	ordinary	79.2519
IGF2R	MYO10	ordinary	65.2689
PPFIA3	VAMP2	ordinary	107.445
GPSM2	CCR5	ordinary	61.2337
CACNA2D4	RASGRP2	redundant	49.4929
BLNK	DGKH	redundant	30.7193
AKT2	PDE3B	ordinary	36.6455
MAPK1	SPRY2	redundant	25.7411
KCNK10	FXYD3	ordinary	84.5313
SLC6A20	KARS	ordinary	64.3748
POLH	XRCC2	ordinary	115.302
VAMP8	ARPC5	redundant	60.7014
CNOT6	PAIP1	ordinary	43.9755
PTEN	HGS	ordinary	62.6021
PSMD6	ANAPC11	ordinary	51.247
EPHA1	EFNA5	ordinary	56.9441
POLR2L	H2AFJ	ordinary	33.0021
PSMC1	PPP2CA	redundant	24.4418
RBBP5	H2AFV	ordinary	12.8555
GTF2H1	NCBP1	ordinary	87.5013
COPS7B	FBXL3	ordinary	75.0039
ALS2	RAB5C	ordinary	40.884
GNA11	INPP5B	ordinary	206.643
PSMF1	TNFRSF13C	ordinary	45.2196
SLC25A13	RARS	redundant	36.4138
CPT1B	MORC2	ordinary	83.9495
CD14	TRAF3	ordinary	42.2074
RAD50	XAB2	ordinary	44.7119
SUMF2	ARSB	ordinary	16.553
CNDP2	PPCS	redundant	22.0226
DVL1	EPHB3	ordinary	63.8687
PSMD6	GTSE1	ordinary	96.6824
CD79B	PIK3R1	ordinary	72.1282
SLC9A3	SLC4A7	ordinary	150.203
PPP1CA	TGFBR1	redundant	36.694
EXOSC1	FBL	ordinary	75.0241
LCLAT1	ACLY	ordinary	54.0702
MCOLN3	NFATC3	redundant	18.3311
BLM	POLR2E	ordinary	49.4655
SLC1A3	QARS	redundant	29.5656
KIF18A	HLA-DQA2	ordinary	63.6507
DYNC1LI1	DIAPH2	ordinary	40.2829
SEH1L	HSPA4L	ordinary	74.216
ARL6IP5	TTLL6	ordinary	115.795
TCF7L1	HIST1H2BK	ordinary	87.7959
PKM	ATP6V0B	ordinary	43.1103
PIK3CB	PDPK1	redundant	65.113
FURIN	NOTCH1	redundant	29.2667
GNG4	AKT3	ordinary	41.4333
SLC35B3	CHST7	ordinary	52.7744
SRSF10	DHX9	ordinary	74.6846
EGFR	WASF2	redundant	70.5798
ARHGAP31	RHOC	ordinary	60.823
RASGRP3	KRAS	ordinary	55.2472
CNKSR1	MAP2K2	ordinary	31.8925
SEC11C	RPS17	ordinary	16.5372
STON1	ACTR3	ordinary	61.0359
GNB4	RASGRP2	ordinary	74.4441
SEC23A	LMAN2	ordinary	93.5548
PLEKHG5	RHOH	ordinary	47.6739
BARD1	HMGN1	ordinary	61.435
GPSM2	CXCL8	redundant	81.2533
UBC	XRCC3	redundant	26.5323
CD79A	TRPC6	redundant	89.1776
CACFD1	VIM	ordinary	62.841
PIP5K1B	BCR	redundant	66.4596
CCNK	CHEK1	ordinary	107.304
PLCB4	DGKG	ordinary	27.0202
MAPK3	ABI2	redundant	85.8272
ABCC9	ATP1B1	ordinary	19.8474
TCIRG1	SLC25A10	ordinary	47.9177
EP400	HIST1H2AC	redundant	28.0266
DVL1	AP2A2	ordinary	87.643
PDE1B	GMPR2	ordinary	26.1595
PIK3C3	MAP1LC3B	ordinary	32.3097
DCTD	RHCG	ordinary	70.4806
PSME4	LIMD1	ordinary	87.5743
SLC39A2	KCNJ11	ordinary	33.8038
ACOT2	HADHB	ordinary	132.131
ABCB10	HMOX2	ordinary	26.9075
PGK1	GAPDH	ordinary	57.8808
RXRA	PDHX	redundant	76.8675
ARHGEF39	RAC2	ordinary	64.0127
PSMB5	BUB3	ordinary	83.704
PIP4K2B	HLA-E	ordinary	20.0549
BTK	ITPR1	redundant	178.02
PSMC3	NFKB2	redundant	27.7378
RPS15A	FBL	ordinary	49.8737
UAP1	ALG14	ordinary	49.4208
FCGR1A	FGFR4	ordinary	48.9375
PKN1	PPP1R14A	critical	125.241
MTM1	PPP2R5D	ordinary	135.524
MYD88	RHOA	ordinary	43.1609
CLCN5	GABRA2	ordinary	29.5005
HADHA	ACSF3	redundant	121.236
LCK	CTLA4	ordinary	29.7407
CACNA1D	GRIN1	redundant	29.0452
SEC24D	CD59	ordinary	42.6867
PSMD14	REL	ordinary	67.5472
TOP3A	NBN	redundant	14.7676
ACTR3	VAMP3	ordinary	49.3699
KIF18A	ACTR1A	ordinary	82.5946
DEPDC1B	RHOU	ordinary	141.497
COPS4	STON2	redundant	18.6945
PSMA4	SPOPL	ordinary	13.4906
PTEN	VAV3	redundant	28.0747
CAMK2G	ITGA1	ordinary	87.9649
SOS1	PAK2	redundant	130.724
PRMT5	WDR77	ordinary	99.7137
GRIN2B	TPM1	ordinary	170.96
SOCS5	NEDD8	ordinary	28.5016
FYN	JAK2	redundant	38.3097
POLD4	BARD1	ordinary	126.292
SPCS1	RPS18	ordinary	35.9732
ATP2B4	NEB	ordinary	148.323
RPS3A	TBL3	ordinary	40.5237
ACSL6	ELOVL7	ordinary	43.8935
ACTR3	SYT8	ordinary	32.8081
HIP1	WNT5A	ordinary	54.0888
ATP2B1	PRKCZ	redundant	69.2403
GPSM2	CCR1	ordinary	53.4475
P2RX4	RASGRF2	ordinary	95.8342
B3GLCT	SPON1	ordinary	28.3985
DBF4	MCM5	ordinary	73.5464
LRP6	PPP2R5C	ordinary	18.338
PSME3	CDC20	ordinary	71.4237
ATAT1	GNPNAT1	ordinary	74.5964
POLR1D	H3F3A	ordinary	56.3078
POM121C	SP100	ordinary	18.2249
ACSL3	ELOVL1	ordinary	18.4998
ARHGAP26	CDC42	ordinary	32.6086
PIP5K1C	SH3GL1	ordinary	82.1053
MAPKAP1	AKT3	ordinary	21.5561
CDKN2A	RUNX3	ordinary	45.8326
DNAJB6	HSPA2	ordinary	31.3681
PSMC2	LNPEP	ordinary	42.7776
CDC42	CENPA	ordinary	119.54
RRAGC	SLC7A6	ordinary	80.149
SLC9A5	SLC9A7	ordinary	72.4062
ATAT1	NAA30	ordinary	39.2043
RAP1B	MAP2K1	ordinary	41.1469
PSMC2	VHL	ordinary	50.3937
TRIP10	RHOT1	ordinary	16.509
PDCD1LG2	CD3D	ordinary	68.0058
ARHGAP10	RHOBTB2	ordinary	30.7268
IL1RAP	BTK	ordinary	89.7317
PSMB10	TNFSF12	ordinary	50.5646
CHMP5	CHMP6	ordinary	50.7142
SPCS3	SEC61G	ordinary	16.8871
ATXN7	HIST1H3H	ordinary	21.891
PPP2R2A	FOXM1	ordinary	59.7233
FZR1	MCM5	ordinary	113.921
CD79B	PRKCE	redundant	93.9869
USP13	BECN1	redundant	18.0121
PIK3R5	BCR	redundant	26.7691
2020-03-02	SLC3A2	ordinary	105.754
GRIN2D	MYL12B	ordinary	175.966
ARHGAP4	RHOU	ordinary	101.473
SEMA3A	DPYSL3	ordinary	15.0565
ORAI2	CALM1	redundant	94.9612
CAMK2D	MYL9	ordinary	218.527
PSME4	OAZ2	ordinary	45.1878
ATP1B1	GNG4	ordinary	44.787
TRPC4AP	SORBS1	ordinary	108.541
TDP1	PRKDC	redundant	112.589
SEC16A	SEC31A	ordinary	30.9199
NEDD8	UBE2F	ordinary	15.1723
RABGGTB	RAB5B	redundant	72.2051
ARHGEF12	CDC42	ordinary	62.7629
VAMP3	INPP4B	ordinary	15.0001
RMI2	FEN1	ordinary	132.813
CA13	AQP11	ordinary	64.7528
AAAS	CPSF4	ordinary	97.7339
PGM2	TKT	redundant	69.8546
SOCS3	STAT1	redundant	21.6977
PSMA5	EGLN3	ordinary	35.0402
SLC6A9	SLC9A8	redundant	73.845
TP53BP2	TP53I3	ordinary	73.6727
SLC5A6	AHCYL2	redundant	293.336
GNG12	DGKZ	ordinary	123.76
NADK	PKM	ordinary	50.5476
RANBP2	SMN1	ordinary	27.0191
PSME3	MAP3K14	redundant	39.7141
ATP2B4	MYL12B	ordinary	135.057
FGFR1	CYFIP2	ordinary	28.5995
TP53	CABIN1	ordinary	18.5426
PSMC4	PPP2CB	redundant	50.4906
CBFB	LEF1	ordinary	149.427
PIK3CB	INPP5J	redundant	38.4769
KCNN3	FXYD6	ordinary	298.181
LY96	IRAK2	ordinary	57.1795
POM121	WDR33	ordinary	30.9557
UBA52	VAMP8	redundant	72.5116
FOLH1	TPGS2	ordinary	13.6729
VEGFA	PLCG1	redundant	122.862
DVL1	KDR	redundant	34.6057
CCT5	BBS4	ordinary	60.1991
PIK3CB	SLC2A8	redundant	37.9154
PECR	PHYH	critical	83.2307
MAP2K1	FXR1	ordinary	26.3557
PIP4K2A	FRS2	redundant	78.7954
TNFRSF10C	TNFRSF10B	ordinary	138.991
ZCCHC11	EIF4A1	ordinary	52.0788
BIN1	TGOLN2	ordinary	25.195
SLC4A4	SLC38A5	ordinary	243.433
PSMA1	LTB	ordinary	53.8741
DVL3	IRAK4	redundant	18.6963
ESPL1	AHCTF1	ordinary	63.8808
STON1	SLC2A8	ordinary	77.3174
PICALM	CD4	ordinary	43.1496
STARD8	RHOH	ordinary	113.405
PSMB6	UBC	redundant	18.708
PLCG1	DAGLA	ordinary	57.6244
LRRFIP1	CD3G	ordinary	27.0858
SUPT5H	TAF13	ordinary	46.5275
PKM	ATP6V1B2	ordinary	45.7882
EYA2	HIST2H2BE	ordinary	87.8647
KCNQ4	ATP1A1	ordinary	25.9907
PSMD4	ITCH	redundant	48.7092
CNOT11	EIF4A2	ordinary	29.5462
CACNA1C	DMD	ordinary	95.6038
B3GNT8	MUC3A	ordinary	66.1173
PPM1A	PRKAG2	ordinary	126.401
COPS7B	ASB8	ordinary	151.239
RRP1	UTP20	ordinary	107.111
CARM1	AGT	redundant	62.4209
CHST12	CSPG4	ordinary	42.5086
SRC	TRAK1	ordinary	28.8541
PRMT5	HIST1H2AC	redundant	43.9933
TRPC4AP	PRKCZ	redundant	40.6333
CLASP1	DIAPH2	ordinary	51.9257
CUL5	RPS27A	ordinary	16.3376
DCTN1	AR	ordinary	63.677
ATP6V1C1	PNP	ordinary	25.0939
GRIN1	GNAI1	redundant	55.783
GRPEL1	FXN	ordinary	110.392
P2RX7	MYL9	ordinary	208.464
CD3E	PRKCQ	ordinary	36.9706
EGFR	PIP5K1A	redundant	38.2512
CYBRD1	SLC40A1	redundant	93.4134
GMPS	LARS	redundant	146.132
ITPR3	ACTG2	ordinary	169.854
ALAS1	PDHB	ordinary	33.1603
FAAP20	FANCD2	ordinary	77.8646
MTMR9	PPP2R5B	ordinary	38.8274
SPTBN2	ACTR10	ordinary	166.292
ARF3	BET1	ordinary	64.8622
CACNA1D	ANXA1	ordinary	45.3841
SRC	FCGR3A	redundant	23.6089
TAF1B	HIST1H2AC	ordinary	47.1003
ATP6AP1	AK9	ordinary	18.5868
LRP5	GSK3B	ordinary	22.4194
CCAR2	HSPA2	ordinary	28.6279
ELOVL7	ACSL1	ordinary	16.3044
NUP54	HSPA4	ordinary	54.0673
WNT5A	ARPC2	ordinary	45.73
DNM1	SLC2A8	redundant	28.5568
IRAK1	CUX1	redundant	58.9263
HADHB	DBT	redundant	153.31
GRIN2D	CLCA1	ordinary	182.555
HLA-DRA	LCK	ordinary	14.4413
ATP6V0D1	UPP1	ordinary	65.2181
FBXO10	CUL1	ordinary	25.2969
PIK3CD	PTPN13	redundant	42.6964
TOP3A	GTF2H3	ordinary	32.909
PEBP1	MAP2K2	redundant	17.0672
KAT5	LIG3	ordinary	35.0603
FNBP1L	SCARB2	ordinary	121.355
TRPC4AP	CALM3	redundant	43.4782
MYO1C	HIST1H3H	ordinary	45.1718
NUP210	SUMO1	redundant	33.7489
B3GAT3	BGN	ordinary	56.0667
POM121	INCENP	ordinary	77.4015
RAB33B	COG4	ordinary	32.2695
PSMD6	PPP2R5A	redundant	53.5523
ITSN2	EPS15L1	ordinary	15.278
DCAF11	NEDD8	ordinary	87.4367
CDK1	DYNLL2	ordinary	66.8735
SLC8A1	CACNA2D2	redundant	57.8132
THEM4	ACSF3	ordinary	27.0159
BIN1	VAMP2	ordinary	117.17
GNG4	CALM1	ordinary	106.244
RPS5	WDR46	ordinary	75.1742
TRPV3	STXBP1	ordinary	148.296
TRAF6	FCGR1A	redundant	19.735
BEST1	CA12	ordinary	103.792
EPHA10	EFNA2	ordinary	62.2371
RPA3	RAD51AP1	redundant	98.8028
FKBP1B	PPP3CA	ordinary	29.993
MAPK3	BLZF1	ordinary	61.6156
ITPR1	SLC24A1	ordinary	77.5418
CAPZB	HSP90AB1	ordinary	118.452
PLCG2	TEC	ordinary	83.203
COPS5	CUL3	ordinary	29.3626
PIP5K1B	PIK3CB	ordinary	91.6071
FXYD3	KCNQ1	ordinary	67.2823
CA9	NT5E	ordinary	57.9516
SRI	ATP2B4	ordinary	226.006
PSMD14	APC	redundant	102.19
SPCS3	RPS3	ordinary	27.284
SEC11A	RPS28	ordinary	24.3631
POLR2H	HIST1H4I	ordinary	28.9723
IRAK1	MYO18A	redundant	51.8824
PKLR	ADCY5	ordinary	115.897
PDGFRA	WASF3	ordinary	43.4232
SMAD4	CDKN2B	ordinary	304.197
GNAI1	CALM1	redundant	149.822
TRPC1	RASGRP4	redundant	74.9763
COPS8	CISH	ordinary	41.974
CSNK1E	DVL3	ordinary	101.012
PRKACB	PPP1R1B	redundant	85.8179
ARHGAP35	HRAS	ordinary	55.9171
ACSL5	PPARD	ordinary	68.7878
WDR19	PDE4C	ordinary	35.5834
COPS5	FBXL7	redundant	61.2297
RTEL1	RMI1	ordinary	27.8049
SH3GL1	ARPC1A	ordinary	22.5965
PTEN	FRS2	redundant	201.461
ATP1A3	SLC4A8	redundant	24.5936
TOMM20	HSPA9	ordinary	61.8668
FN1	MAP2K2	ordinary	21.1058
PAK2	CALM1	redundant	89.8671
RNF40	HIST1H2BJ	ordinary	13.2344
AAAS	HSPA1A	ordinary	39.6635
TKT	MPI	ordinary	113.126
RMI1	RFC4	ordinary	165.306
RBL2	CDC6	ordinary	69.2253
GPSM3	GNAI2	redundant	98.4609
EIF1AX	RPL13	ordinary	47.6242
RYR2	CACNA1C	redundant	37.0135
FGFR1OP	RHOA	ordinary	18.3205
HDAC10	HIST1H2BD	ordinary	30.6006
TRPC4AP	PXN	ordinary	39.0051
TRPV4	SLC8A1	ordinary	86.6019
NUP160	HSPA4L	ordinary	49.6058
RB1	CDT1	ordinary	77.4685
GAB2	MYO18A	ordinary	45.8142
PKLR	CALM1	redundant	85.7594
ZDHHC2	SLC27A5	redundant	46.2159
SLC1A7	AKAP1	redundant	15.7582
ARHGAP5	RAC3	ordinary	29.0239
EXOSC5	RPS6	ordinary	109.609
HDAC1	CDK1	ordinary	81.1438
CDK1	H3F3A	redundant	74.8751
POM121C	HSPA4L	ordinary	30.3437
NFIX	POLR3H	ordinary	20.6944
AXL	GRB2	ordinary	55.2234
PIK3R5	STON2	redundant	29.2042
DIAPH2	NUP43	ordinary	94.2792
TCIRG1	AK9	ordinary	37.2089
ARHGAP35	RHOT1	ordinary	51.9694
TRPM6	CALM2	redundant	265.678
SLC28A2	AKAP9	ordinary	66.5335
PSMC3	TPP2	ordinary	47.3225
PPP1R12A	MYL12B	ordinary	33.7441
NME1	IFT122	ordinary	88.3888
PACSIN3	DAB2	ordinary	14.7187
SAE1	SUMO3	redundant	27.0879
ARHGAP19	RHOG	ordinary	20.5795
CHN2	RAC3	ordinary	35.0295
CNOT6	EIF4A1	ordinary	37.5133
GRAP2	ITPKB	ordinary	91.1889
CACNA2D2	TMOD3	ordinary	18.3343
POLE2	EXO1	ordinary	192.322
PSMD10	HNRNPD	ordinary	46.6673
PSMB10	TNFRSF11A	ordinary	20.3734
CCND2	RUNX1	redundant	77.6094
COPS6	BTBD1	ordinary	48.5821
DNM3	IGF2R	redundant	13.022
SF3B1	HIST1H3H	ordinary	33.6297
HOXA1	HIST1H2BN	redundant	14.3264
PLD1	PITPNM3	ordinary	117.38
CALM1	STXBP1	ordinary	106.64
VAMP3	PIP5K1C	ordinary	38.0507
AK9	ATP6V1E2	ordinary	66.7625
AKAP9	PLN	redundant	188.906
SLC28A2	ATP1B3	ordinary	60.6144
ACOT2	ACSF2	ordinary	90.6162
AKAP9	CALM2	redundant	73.3589
DBF4	PRIM1	redundant	156.671
CHML	RAB36	ordinary	72.6235
GRB2	VAMP3	redundant	29.13
ABCD1	PLA2G16	ordinary	33.1
HLCS	ACACA	ordinary	76.0203
CD79B	DGKH	redundant	71.75
PIK3CB	VAMP3	redundant	38.7004
POLR2D	ATM	ordinary	91.2345
RIOK3	RPS27L	ordinary	127.574
SUCLG1	HADHA	ordinary	195.805
GRIN2B	ATP2A3	ordinary	111.85
PPFIA1	SLC1A3	ordinary	22.8302
UBB	FANCM	redundant	37.9448
BIRC2	TICAM1	redundant	32.3755
CATSPERG	PPFIA3	ordinary	32.0624
GPSM3	PF4	ordinary	27.8097
PIAS2	UBE2I	redundant	69.0115
SEC24C	F8	redundant	26.818
CLCN7	SLC4A8	redundant	38.2711
OPLAH	SLC25A22	ordinary	59.5257
CASP6	LMNA	ordinary	37.704
EP300	VEGFA	redundant	80.57
ATG12	ATG10	ordinary	49.0545
PLCD1	DGKG	ordinary	239.605
CTNNB1	TCF4	ordinary	35.6029
PTEN	GNB2	ordinary	74.8578
EED	HIST1H2BD	ordinary	24.0396
PDGFRB	PDPK1	ordinary	25.311
ISG15	KPNB1	ordinary	25.1469
PSMD11	ANAPC1	ordinary	60.6223
SLC6A8	ATP1B1	redundant	23.6849
STAT2	STAT1	ordinary	145.748
GNG11	PRKCD	ordinary	81.4386
SAP18	H2AFX	ordinary	47.5777
OSBP	PPM1L	ordinary	53.9551
PSMC4	TRAF2	redundant	46.3851
SLC1A1	ATP1A1	redundant	84.585
PPP1R12B	MYH14	ordinary	153.03
COPS7A	DDB2	redundant	17.5664
CAMK2G	ATP2C1	ordinary	104.562
RXRA	ANGPTL4	redundant	62.9525
DGAT2	SLC27A5	redundant	89.3945
ARHGAP27	RHOJ	ordinary	44.5978
ADRA2A	GNB1	redundant	40.6814
PSMC3	CUL5	redundant	35.3921
DVL1	PIK3R4	redundant	48.1529
2020-09-02	PRKAR2B	ordinary	59.8971
CUX1	VAV2	ordinary	35.3986
NELFB	CHEK1	ordinary	84.5956
ZFHX3	CDKN1A	ordinary	39.7125
LDLR	SCARB2	ordinary	40.648
ATP6V1G1	NME2	ordinary	19.0262
RPS24	DIEXF	ordinary	75.7799
PTPRA	HRAS	ordinary	17.0582
MCOLN3	AKAP9	redundant	89.1825
PLA2G6	GALNT2	ordinary	12.6851
PTPN22	HLA-DQB1	ordinary	36.5938
SPTBN1	TMED2	ordinary	14.423
CBL	SYT11	redundant	75.7334
ACOT11	ACSL5	ordinary	37.2556
KAT5	POLR2K	ordinary	21.5259
ACOT13	SLC27A2	ordinary	43.0829
AHCYL1	GNAI1	redundant	65.9296
SAP30	HIST2H2BE	ordinary	23.9669
KITLG	STAT5A	redundant	33.5495
TRPV4	CLCA4	ordinary	173.943
ARHGEF38	RHOC	ordinary	80.8362
SREBF2	CYP51A1	redundant	76.0104
EIF5	RPS15	ordinary	42.1629
RNF8	SUMO2	ordinary	74.6558
EXOSC3	NOL6	ordinary	163.667
SH3KBP1	ITPKB	redundant	76.4925
TAF9B	HIST1H2BN	ordinary	22.2891
CAMK2D	ANXA2	ordinary	50.9695
USP21	IL33	ordinary	16.7164
SEC24D	FOLR1	ordinary	35.6145
PSMA4	PPP2R5B	redundant	22.2286
GSR	GSTO2	redundant	29.8189
VAMP2	P2RX5	ordinary	97.8885
PSMD7	GOT1	redundant	49.3117
ATP1B1	KCNMB4	ordinary	14.9125
BCR	RHOC	ordinary	49.666
GNG7	GAB1	ordinary	211.133
MAPKAP1	SGK1	ordinary	218.17
PSMD8	AMER1	redundant	36.0188
CLTB	FZD5	ordinary	73.3851
MCOLN3	SORBS1	ordinary	88.0475
STX1A	MCOLN3	ordinary	59.8481
CACNB1	TPM3	ordinary	67.9055
LCLAT1	LPIN3	ordinary	17.7289
AKAP1	LMOD1	ordinary	149.958
SLC9A5	ATP1A3	ordinary	42.7205
CHD4	HIST3H2A	ordinary	90.7701
ARL2BP	CALM3	redundant	24.4937
CARM1	NPAS2	redundant	40.8972
PIP5K1B	VEGFA	redundant	119.521
PIP5K1B	PPP2R5D	redundant	59.2003
PSMC3IP	HIST2H2BE	ordinary	37.2044
COPS2	SPSB2	ordinary	33.384
POM121	HSPA12B	ordinary	14.8391
SPCS1	RPL24	ordinary	78.9187
AP2A1	PTPN13	ordinary	18.7923
DIAPH2	SPC24	ordinary	66.8704
MPC1	DLD	ordinary	94.7582
RYR2	ATP2C1	ordinary	28.0062
CDC37	GAB1	ordinary	139.293
AKAP1	MYL9	ordinary	175.859
STX1A	TRPC1	redundant	72.8126
AKT3	PHF20	ordinary	65.8275
MCOLN3	VIM	ordinary	18.7376
PSMD5	WTIP	ordinary	18.7936
ATP1B1	SLC3A2	redundant	80.6455
PSME4	TNFRSF13C	ordinary	68.1113
NUP37	HSPA1L	ordinary	77.0041
NLK	MYC	redundant	84.669
RBBP8	CDK7	ordinary	45.2164
CAMK2D	EPB41L1	ordinary	52.129
RPIA	PRPS1	ordinary	100.302
MAML2	HEYL	ordinary	37.4435
NUPL2	HSPA1B	ordinary	39.944
EXOSC10	WDR75	ordinary	110.872
PTPN22	HLA-DPA1	ordinary	57.1689
SRSF10	SRSF2	ordinary	111.289
ANAPC4	FZR1	ordinary	61.3173
CHRM3	GNAQ	ordinary	59.3585
DLD	GCDH	ordinary	20.8221
GNPAT	MORC2	ordinary	67.3738
BRCA1	ERCC6	redundant	76.385
EXOSC9	IMP3	ordinary	38.5032
OTUD7B	TNF	redundant	43.6524
PSMB5	TNFRSF13C	ordinary	63.2997
GSR	GPX2	redundant	26.8496
GNG11	CPSF6	ordinary	65.2678
ARHGAP11A	RHOD	ordinary	59.5045
RCOR1	HIST1H2BG	ordinary	15.1711
RAF1	RAP1A	redundant	134.004
GAB2	FCGR1A	ordinary	27.1816
PSMD11	AJUBA	redundant	245.177
MORF4L2	HIST1H2AC	ordinary	58.0264
CATSPERB	CAMK2G	redundant	83.291
NUP88	SNUPN	ordinary	41.859
ERCC2	RAD51D	redundant	64.2495
GALNT1	MUC5AC	ordinary	43.7603
SSB	POLR3H	ordinary	47.1208
PDCD1	HLA-DPB1	ordinary	103.589
SCNN1B	SLC4A7	ordinary	166.378
TPCN1	TPM3	ordinary	25.0585
ITPR2	SYT1	redundant	38.6985
CA2	ATP6V1G1	ordinary	319.259
CUL3	DVL3	redundant	15.085
UBA52	POLD3	ordinary	43.6552
SPIDR	BLM	ordinary	60.0449
TYROBP	CNTRL	ordinary	19.7616
AP2A1	INPP4B	ordinary	14.3059
PIP5K1A	PDGFRA	redundant	47.0548
RPS5	EMG1	ordinary	51.6365
AHCYL1	CPLX1	ordinary	39.5379
SLC35A1	ST3GAL3	ordinary	68.0641
CATSPER2	DMD	ordinary	81.2886
NUP205	GEMIN8	ordinary	85.0766
B4GALT6	MUC4	ordinary	22.3264
NUPL2	ALYREF	ordinary	77.1077
PLD4	CHKB	redundant	29.0106
DCUN1D5	CUL4B	ordinary	109.681
SEH1L	SNRPE	ordinary	55.5949
APP	TPM4	ordinary	32.6341
USP3	HIST1H2AC	ordinary	21.3713
NMT1	ACSL4	ordinary	48.3658
PICALM	LDLRAP1	ordinary	32.6029
RGS16	GNAI1	ordinary	126.207
EIF1AX	RPL4	ordinary	45.2204
PIP5K1A	AKT1	redundant	20.9814
GPSM2	GNAI3	redundant	66.6113
SUDS3	HIST1H2BD	ordinary	14.276
BLM	GTF2H3	ordinary	129.839
SYNJ1	PPP2R1A	redundant	92.9091
INPP5D	ARRB1	ordinary	96.318
PIK3CB	UBA52	redundant	102.861
STX1A	CNGA1	ordinary	96.0463
CASK	VAMP2	redundant	109.234
HLA-DPB1	LCK	ordinary	17.9669
ATP6V0D2	PNP	ordinary	90.0317
STAT3	ICAM1	ordinary	60.9888
METTL3	POLR2D	ordinary	133.806
SLC39A6	S100A8	ordinary	43.1708
B2M	CYFIP1	ordinary	59.9949
MAT2B	MECOM	ordinary	25.1082
TIAM1	RHOQ	ordinary	45.1545
ARL2	ATP6V1C1	ordinary	14.0966
GNG12	FXYD6	ordinary	174.601
EXO1	RFC3	ordinary	201.609
B3GLCT	ADAMTSL4	ordinary	54.3133
CPSF6	INPP5D	ordinary	58.6373
CDK12	FANCI	ordinary	106.02
PIK3AP1	ITK	ordinary	43.1914
ATP1B1	CALM2	redundant	36.7105
UBA7	DDX58	ordinary	36.8678
DNAJC2	HSPA12B	ordinary	65.087
SLC7A7	SLC4A4	ordinary	216.93
SH2D2A	BRK1	redundant	29.1577
ERBB2	CYFIP1	ordinary	14.5792
PLA2G4A	ACTR10	ordinary	22.6514
PIK3R6	FGFR2	redundant	88.5687
PIK3C2A	ARPC4	ordinary	25.2435
PPP2R1B	BRAF	ordinary	39.0157
COPS4	FBXO21	ordinary	25.0832
EXOSC2	NOP58	ordinary	188.045
PSME2	AMER1	redundant	27.7721
BOP1	RRP36	ordinary	80.9667
TRPC1	ACTA2	ordinary	114.771
PIK3R5	ABI2	redundant	30.6275
CCNB1	BIRC5	redundant	251.425
ARHGEF7	RHOU	ordinary	111.178
LIG3	CCNH	ordinary	46.0971
SCN9A	FXYD6	ordinary	312.427
MTMR3	PLA2G4C	ordinary	63.0885
CDK1	SKA2	ordinary	184.201
BARD1	GTF2H1	ordinary	100.74
PIK3R2	FGFR3	redundant	18.2579
JMJD6	HIST1H3H	ordinary	20.3512
BARD1	HIST3H2A	redundant	70.7848
FKBP1B	RASGRP4	redundant	68.9993
TIMM17A	HSPD1	ordinary	121.918
PLCB4	OCRL	ordinary	74.1694
MCOLN1	TNNC1	ordinary	18.1085
SEH1L	SLBP	ordinary	108.996
SH3KBP1	DGKE	redundant	43.6661
ADCY6	PRKACB	ordinary	130.621
CDK5	FOXO3	ordinary	54.7121
NUP37	SNRPG	ordinary	170.71
PLEKHG2	RHOH	ordinary	68.134
ASPH	PLN	redundant	144.685
ARHGAP4	RHOT2	ordinary	46.6006
DVL1	PDGFRB	redundant	38.8898
PIK3R6	EPN1	ordinary	19.6418
CCNB2	PPP2R1A	redundant	42.7419
ALOX12	GPX2	ordinary	34.2699
NUP188	TOP2A	redundant	102.924
ARHGAP8	CDC42	ordinary	43.7167
ATP1B3	SLC6A6	redundant	138.903
SLC24A3	TRPA1	ordinary	27.7125
NGEF	RHOBTB1	ordinary	19.1644
SLC25A6	ATP6V1C2	ordinary	60.6155
CHMP3	UBB	ordinary	53.4014
ACADS	ECHS1	critical	228.053
TRAPPC3	RAB1A	ordinary	21.038
HRAS	CNKSR1	ordinary	26.9861
EP400	CDKN1A	redundant	43.4383
GNB5	DGKH	ordinary	14.114
PIP5K1B	ARRB1	ordinary	125.331
NBN	GTF2H5	ordinary	34.2983
GNB2	ITPR2	ordinary	38.1819
DEGS1	COL4A3BP	redundant	41.7813
GNG10	FGFR1	ordinary	50.2245
SNX9	TGOLN2	ordinary	57.1712
COPS5	FBXO41	ordinary	85.7022
ORAI1	CALM3	redundant	51.0644
CAMK2G	CALM3	redundant	95.9447
PIP4K2B	SDC4	redundant	21.6797
SCNN1A	SLC9A8	ordinary	16.2932
ACOT9	BCKDHA	ordinary	48.0712
COPS8	FBXO21	ordinary	44.1818
CNTRL	INPP5D	ordinary	41.2879
ARHGEF19	RAC2	ordinary	51.9042
RAD50	H2AFX	redundant	67.2297
PSMD8	ANAPC5	ordinary	91.3366
KDR	FCGR1A	redundant	52.1247
EPHA10	RAC1	ordinary	53.2907
MBOAT7	SLC27A5	redundant	39.5764
RMI1	POLR2K	ordinary	59.6204
EXT1	GPC2	ordinary	69.6201
ACOT2	ACSS1	ordinary	23.386
TOMM5	HSPA9	ordinary	40.1148
CALM2	PDE3A	ordinary	74.3688
HDAC8	GNPNAT1	ordinary	60.269
MET	RAP1B	ordinary	124.076
AKAP1	CPNE1	ordinary	77.2896
COPS2	ASB13	ordinary	36.4307
SLC6A6	ANO6	ordinary	112.979
NUP62	NCBP1	ordinary	34.0187
STAM2	EPS15L1	ordinary	34.1435
COPS7A	DCAF4	ordinary	18.0063
PSMA2	BIRC3	redundant	19.5323
IL3RA	JAK2	ordinary	24.6076
MAPK14	RPS6KA5	ordinary	55.6583
NUP50	HSPA5	ordinary	36.2346
ARHGEF28	LIMK1	ordinary	63.7875
ANK2	TMED10	ordinary	138.294
RHOC	LIMK1	redundant	88.2833
ARHGEF15	RHOBTB1	ordinary	18.252
CAMK2D	TLN1	ordinary	86.5237
INPP5K	FCHO2	ordinary	45.0109
TRPC1	CPNE3	ordinary	44.1677
CD14	TIRAP	ordinary	34.5178
NUP35	HNRNPC	ordinary	114.152
NUP62	SMN1	ordinary	43.4591
ARHGAP28	RHOT1	ordinary	54.555
PSMA2	CCNE2	redundant	54.5265
SLC4A2	CA12	redundant	130.645
CLCN7	CLCA4	ordinary	164.964
CACNB2	TMOD1	ordinary	145.138
B3GAT3	AGRN	ordinary	60.3873
CBFB	IL2RA	ordinary	103.968
SLC38A2	DARS	redundant	68.2267
NME1	AK2	redundant	126.582
PIP5K1B	MTMR2	ordinary	64.0177
FGFR1	FGFR3	ordinary	30.6206
USP8	MET	redundant	125.432
PSMB7	SUFU	redundant	57.5774
ST3GAL4	NOTCH4	ordinary	19.0525
NCOA2	G0S2	ordinary	16.8875
CALM1	SLC9A6	redundant	92.6584
2020-09-02	TUBB	ordinary	35.7845
GNAI2	CALM2	redundant	31.7763
TRPA1	ITGB5	ordinary	21.7092
ASL	AIMP1	ordinary	23.1086
AKAP9	CALD1	ordinary	139.148
SYNJ1	MTMR3	ordinary	137.257
ARHGEF16	RHOT2	ordinary	57.5748
CCNC	NOTCH1	ordinary	47.674
LPCAT3	PLD4	ordinary	125.111
CACNA2D4	ANXA2	ordinary	17.8754
LGMN	HLA-DRA	redundant	83.8983
RBBP7	NEDD8	ordinary	32.0327
DVL2	GNB2	ordinary	23.2423
ARHGAP1	RHOB	ordinary	12.6766
FGFR2	MYO18A	ordinary	83.8298
PSMD14	GTSE1	ordinary	141.105
SEC23A	CNIH3	ordinary	79.9247
EIF1AX	RPL23	ordinary	41.8057
GNL3	PELP1	ordinary	87.9317
ACLY	ACAT2	ordinary	65.7933
ARHGEF2	RHOA	ordinary	13.7219
DVL3	PPP2R5C	redundant	31.0005
KMT2D	H2AFJ	ordinary	16.2121
ATP1B3	SLC12A7	ordinary	50.1075
PSME4	APC	redundant	151.034
RMI2	CUL4B	redundant	32.17
PI4K2B	OSBPL8	ordinary	64.6914
BOP1	RPS2	redundant	132.566
KCNIP3	SLC12A2	ordinary	79.5556
PIK3R2	CLTB	ordinary	26.5184
BRIP1	HMGN1	ordinary	64.609
ARF4	USO1	ordinary	70.0865
CSNK2A1	TP53	redundant	17.8077
GRB2	INPP5A	redundant	106.494
CCNB1	CDC16	ordinary	103.95
VAV1	CALM1	ordinary	101.102
SLC1A3	SLC4A7	redundant	28.23
CA7	ATP6V0B	ordinary	343.487
CALM2	ITGB5	ordinary	30.5135
ATP6V1H	MTAP	ordinary	48.2884
PIK3R6	VAMP2	redundant	128.606
SLC12A2	KCNC4	ordinary	55.2153
CSGALNACT2	BGN	ordinary	117.935
EYA3	HIST1H2BG	ordinary	28.4616
DTYMK	ATP6V0D2	ordinary	134.098
CALM2	ICAM3	ordinary	55.8976
MAP3K1	IKBKB	ordinary	23.4315
PIK3R1	BAIAP2	redundant	39.2968
GRB2	BAG4	redundant	31.9467
GPSM3	GNB2	ordinary	16.5673
GNB2	GNAS	ordinary	18.1383
GNG2	AKT3	ordinary	291.534
PIP5K1A	ICOS	ordinary	26.8
KIF23	HLA-DQB2	ordinary	77.7529
PIP5K1B	FYN	redundant	65.4864
RAF1	ZC3HAV1	ordinary	48.0238
HDAC2	HIST1H2AE	ordinary	53.5864
CATSPER2	MYL9	ordinary	182.17
GNAI2	PRKAR2A	ordinary	21.5107
A2M	RHOT1	ordinary	56.5619
CD79B	INPP5B	redundant	79.4193
RMI1	POLR2L	ordinary	32.5012
EGFR	BTK	redundant	69.2477
WRN	FAAP100	ordinary	40.2676
PSMB3	SPOP	ordinary	47.012
BARD1	TCEA1	ordinary	63.9712
ARHGEF1	RHOV	ordinary	26.4651
RPS3A	NOC4L	ordinary	44.707
COPS7B	FBXW8	ordinary	60.6849
TRPV3	PLA2G4A	redundant	126.581
TULP3	PRKAR2A	ordinary	39.034
BCR	VAV3	ordinary	24.7284
[truncated: 62,517 more rows]

## Sheet: ESCA
node1	node2	edge_type	activity
NUP98	CDCA8	ordinary	34.8107
SOCS1	TLR2	ordinary	15.5255
SH2D2A	CYFIP2	ordinary	42.8598
PLAT	PDGFD	critical	42.3806
ACVR2B	BMPR1A	ordinary	30.965
GNG7	PRKCQ	redundant	30.9365
HIST3H2BB	CHEK2	ordinary	40.3995
CCNB2	SEC13	ordinary	19.5835
STAT4	LCP1	ordinary	60.2824
AGO4	CDKN2A	redundant	15.5736
MTMR14	PLBD1	redundant	14.6686
ARRB1	MAPK3	ordinary	21.4202
SLC25A4	GNAI1	redundant	57.6841
VCL	MAPK1	ordinary	13.1792
TFAP2A	PITX2	redundant	16.4958
MBOAT1	PLA2G4E	redundant	14.2257
RFC5	XRCC2	ordinary	48.3093
KIF2C	HLA-DRB1	ordinary	25.0589
DNA2	RFC1	ordinary	23.2375
ATM	RBX1	redundant	13.5019
PSMD8	ANAPC16	ordinary	13.6282
HLA-DQB1	ZAP70	ordinary	28.785
EXO1	POLR2E	ordinary	32.0255
HIST1H2BC	CHEK2	ordinary	22.018
SUPT16H	CHEK1	ordinary	38.0168
EXO1	POLR2L	ordinary	22.5147
ARHGAP6	RHOBTB2	ordinary	15.8019
POLR2H	FANCI	redundant	29.2265
IRAK1	CYFIP2	ordinary	39.9975
SLC25A16	BCKDHB	redundant	46.1198
FKBP1B	TNNT1	ordinary	14.5919
CCNB2	CENPU	ordinary	42.6266
EXO1	FANCE	ordinary	32.9271
BRCA1	SYCP2	ordinary	17.4342
NRG1	INPP5J	redundant	20.4676
PEMT	PTDSS1	ordinary	17.4586
RYR1	CALD1	ordinary	16.0682
GNPDA1	MPI	ordinary	15.0337
DAPP1	CALM2	redundant	13.756
SH3KBP1	NCK1	ordinary	15.3013
PIK3CA	FGF2	redundant	13.2918
FAM13A	RHOQ	ordinary	25.3808
PSME2	SKP2	ordinary	22.6611
MAN2B2	MANBA	critical	27.5414
STX1A	NEFL	redundant	12.8059
INPP5J	AP2A1	ordinary	18.5858
TCIRG1	DTYMK	ordinary	13.9031
CTTN	VAMP2	ordinary	21.2229
RUNX3	TEAD1	ordinary	13.6361
PSMD6	CKS1B	ordinary	23.0999
CACNB2	CHRNB4	ordinary	15.1629
SLC35A3	MGAT4B	ordinary	13.02
CEP152	AURKA	ordinary	35.4801
IRAK3	TOLLIP	ordinary	12.6871
CDK1	H2AFZ	redundant	46.7097
SLC52A2	RFK	critical	14.0358
MAT2B	SLC25A26	redundant	12.5946
AK9	ATP6V0E2	ordinary	19.1475
DDX21	H2AFX	redundant	17.771
MCOLN1	TLN1	redundant	16.9
NFIA	POLR3K	ordinary	18.6729
LIG1	AQR	ordinary	14.2151
FCGR2A	PLCG1	ordinary	12.6149
ORMDL2	MORC2	ordinary	12.6094
PLCE1	PRKCD	redundant	21.738
RBL2	CDC25C	ordinary	21.8378
PSMC2	CDC20	ordinary	38.8361
CDK1	CDC26	ordinary	31.9683
PSMA6	MAD2L1	ordinary	32.136
PSMA4	OAZ2	ordinary	20.4136
PSMD7	AJUBA	redundant	17.8648
ZMYM2	ABI2	ordinary	24.3933
CACNA2D4	CPLX1	ordinary	17.8377
KAT5	RFC4	redundant	19.071
SMAD4	SMAD7	redundant	18.8757
PSMB2	PRICKLE1	ordinary	13.0304
C1GALT1	MUC13	ordinary	26.028
RNLS	PXDN	ordinary	14.9698
GNG4	INPP5J	ordinary	19.9529
TRPV2	ATP2A2	ordinary	16.8005
PCOLCE	COL24A1	ordinary	34.5151
SUOX	PRDX3	critical	18.6986
ATP1B3	KCNN4	ordinary	14.7428
RFC2	RAD51AP1	ordinary	31.9464
P3H3	COL5A3	ordinary	20.1168
DNA2	FANCI	redundant	65.5364
IL33	WASF3	redundant	25.7183
TAF1A	HIST1H2BG	ordinary	17.2816
ORAI1	SORBS1	ordinary	28.6955
CCDC8	BIRC5	ordinary	32.411
RAE1	AURKB	ordinary	48.2844
GPSM3	CXCL8	redundant	19.1502
ADCY5	HCN2	ordinary	24.3164
COPS8	SKP2	ordinary	17.82
HIST4H4	H2AFX	ordinary	15.552
PSMD12	TNFSF12	ordinary	22.2866
NME1	TTC21B	ordinary	17.7027
ANK2	TMED9	ordinary	19.3935
HIST1H2BD	H2AFX	ordinary	16.5448
LEF1	HIST1H2BG	redundant	14.7142
PIK3C2B	ACTR3	redundant	14.4945
LPGAT1	ACSS2	ordinary	16.6236
ORAI2	TMOD1	ordinary	27.5064
POLK	RAD50	ordinary	26.7042
SLC25A16	CPT2	redundant	26.76
ITSN1	ARPC1B	ordinary	19.2124
GNGT1	CACNA2D2	redundant	22.6393
PTGS2	PTGIS	ordinary	14.6455
TYROBP	KL	ordinary	50.0146
CALM1	PYGL	redundant	12.7599
P2RX7	PLN	redundant	23.7303
FKBP1B	VAMP2	redundant	22.2361
PSMB6	CDK2	redundant	26.7317
HAUS5	AURKA	ordinary	29.9555
MMP9	CDH1	ordinary	14.1525
FAM13B	RHOBTB2	ordinary	23.0315
PIP5K1C	PIK3CD	ordinary	13.5377
AK7	ATP6V0A2	ordinary	16.0853
DEK	HIST1H4I	ordinary	20.9737
OSBPL10	SACM1L	redundant	30.908
CAMK2G	SORBS1	ordinary	43.934
PIK3R1	CD3G	redundant	14.1405
TNRC6C	NOTCH4	ordinary	13.281
PTPN6	HLA-DRB1	redundant	13.3877
TAF10	HIST1H2BH	ordinary	13.1368
SMDT1	SLC8B1	ordinary	15.5074
TBL1XR1	FADS1	redundant	15.3062
CCNB2	TPR	ordinary	21.7357
ARHGAP10	CDC42	ordinary	16.2466
ITPR1	TMOD2	ordinary	41.7561
FAM20C	IGFBP7	ordinary	22.8614
PREX1	RAC2	ordinary	24.4103
CACFD1	DES	ordinary	19.9008
SMAD2	SMAD7	critical	18.0123
SPCS3	RPL30	ordinary	16.1502
ABCA5	ABCA6	ordinary	17.8828
PSMD10	CCNE2	redundant	13.6783
DNA2	NHEJ1	ordinary	24.0766
TOP3A	PRPF19	ordinary	20.713
NUP43	CPSF3	ordinary	15.6442
PIK3R5	TFRC	redundant	16.9275
CRLS1	BCKDHB	redundant	55.2071
PFAS	TTLL4	ordinary	18.0462
ATP1B2	ARL6IP5	redundant	25.9659
ETHE1	TST	critical	15.885
ATM	MDM4	ordinary	25.4578
PPP2CB	RBL1	ordinary	18.0173
RFC5	KAT5	ordinary	16.6133
ITPR2	MYL9	redundant	15.0655
UBC	XRCC2	redundant	18.5894
SLC26A6	CLCA2	ordinary	14.3799
SLC25A6	GNAL	redundant	25.699
ERCC6	H2AFX	ordinary	12.6206
RPS27A	ISG15	redundant	15.5215
RUNX1	CAMK2D	redundant	12.9552
SLC25A4	ADCY7	ordinary	64.083
CD79A	RASGRP3	ordinary	21.9748
SOCS2	JAK1	redundant	16.0119
PIK3CG	BTK	redundant	55.4168
AK3	NME4	ordinary	28.5952
LPCAT1	MORC2	ordinary	14.7691
PSMB2	TNFRSF1B	ordinary	13.5386
RAD50	FEN1	redundant	17.4821
DCTN3	AURKA	ordinary	24.1792
SYNJ1	PLA2G12A	redundant	20.5299
HADHB	ACAA2	redundant	16.5506
CACFD1	CPNE7	ordinary	17.8964
GMPS	GLUL	redundant	42.3613
MPHOSPH6	UTP4	ordinary	26.8393
HIST3H2BB	NCAPH2	ordinary	13.2955
FCGR2A	VAV2	ordinary	17.6742
NCOA1	ATP1B2	redundant	30.105
NUP62	HSPA4	ordinary	13.8454
BRIP1	FANCE	ordinary	20.7607
GRIK5	PLN	redundant	138.939
GRAP2	PRKCQ	ordinary	14.3524
EPN1	ARRB1	redundant	29.1553
VAV2	RAC2	ordinary	13.7942
MYO18A	CYFIP1	ordinary	13.8052
CCNA2	ORC2	ordinary	18.0019
PDGFRA	PLCG1	ordinary	14.8865
H2AFX	HIST1H3H	redundant	17.2152
PIK3CG	ITK	redundant	40.7645
AK9	ADCY4	ordinary	25.5156
TFDP2	CDC6	redundant	19.0474
CBL	EPS15	redundant	18.2239
FBP1	PFKFB2	ordinary	30.824
ATP1A1	ABCC9	ordinary	25.3981
ARFGAP3	CD55	ordinary	25.2985
GATAD2A	HIST3H2BB	redundant	13.0287
TSC2	LAMTOR3	ordinary	13.3826
CACNB1	DMD	ordinary	22.2207
EXOSC5	WDR46	ordinary	24.0058
EME1	EXO1	ordinary	78.6374
DNA2	UBA52	redundant	14.5689
RBBP4	MEAF6	critical	15.0401
ARPC5	WNT5A	ordinary	16.3164
RAC2	RHOB	ordinary	19.373
PSME1	CKS1B	ordinary	30.0665
SETDB2	HIST1H3G	ordinary	13.2506
SLC22A5	SLC4A4	ordinary	17.4656
CACNB2	ACTA2	ordinary	42.9989
ABL1	WASF3	redundant	38.0529
ITPR1	ITGB5	ordinary	24.9395
SRI	TLN1	redundant	18.9101
ARHGAP11B	RHOV	ordinary	14.3454
SLC10A6	ATP1B2	ordinary	16.3561
GRB2	WASF3	redundant	18.3255
ACAT2	HMGCS1	critical	14.8579
SLC6A20	GRIN2D	ordinary	16.3347
PRKACB	GLI2	redundant	39.2309
PIK3C2G	FZD4	redundant	45.9252
BARD1	MAD2L2	ordinary	15.5209
CLOCK	PER2	critical	16.0967
NUP155	HNRNPC	ordinary	24.2896
CDK1	MAD2L1	ordinary	67.9593
CA2	PAICS	redundant	24.9001
GAB2	CD28	redundant	20.4436
NUP85	AURKB	ordinary	37.7054
TOP3A	LIG3	ordinary	16.9603
STAT3	MMP3	ordinary	15.7774
PDGFA	KL	ordinary	44.5413
BARD1	CHEK1	redundant	30.9179
TSC2	MLST8	ordinary	13.2391
TRPM7	UNC13B	redundant	16.6898
FANCA	FANCM	ordinary	30.3708
CLTA	ARPC1B	redundant	14.5836
POLD4	RPA3	ordinary	17.7358
PDE1C	AK2	ordinary	30.9226
AP2S1	VAMP2	ordinary	23.2302
GNG2	ITPR1	ordinary	38.3583
PTPN11	KL	ordinary	44.531
NCL	NOC4L	ordinary	15.7631
EXOSC4	UTP14C	ordinary	20.0602
JAK2	STAT5A	redundant	19.4598
STON1	PIP5K1C	ordinary	39.8549
SLC4A2	ANO1	ordinary	32.0487
ARRB2	TGOLN2	ordinary	17.8616
STON2	PTPN13	ordinary	16.8956
SLC25A16	DLST	redundant	17.5742
CEP250	AURKA	ordinary	33.9358
DVL3	EZR	ordinary	19.3048
CLIC2	ACTA2	ordinary	20.8552
BLM	EP300	redundant	24.2059
PSMB5	HECW1	ordinary	16.018
SLC4A3	ANO7	redundant	19.8545
HSP90AA1	AURKA	ordinary	32.5712
SLC8B1	MICU3	redundant	21.8497
RMI2	POLR2J	ordinary	28.5665
NUP43	KPNA2	ordinary	23.4228
CACNB2	GRIK5	redundant	52.2894
ORMDL3	ACLY	critical	21.5764
PSMD14	NUMB	ordinary	18.4296
POLE2	BRIP1	ordinary	56.564
CALM2	PDE4D	ordinary	17.1459
RUVBL1	HIST1H2BN	redundant	20.2185
SLC22A5	ATP1B3	ordinary	17.3719
NAGS	PDHA1	ordinary	13.3081
HLA-DPA1	ZAP70	ordinary	36.2948
PSMA4	PPP2R5E	ordinary	12.6263
DLG4	CACNA2D2	redundant	20.8103
SYNJ2	EPS15	redundant	16.9944
ATP1B3	KCNJ15	ordinary	24.8082
CTSS	TLR7	redundant	15.0082
GNG5	CACNA2D2	ordinary	15.4457
ARHGEF6	RHOH	ordinary	52.8317
PSMD8	BUB1B	ordinary	23.1501
GPD1L	GPAT4	critical	20.5475
PSMD9	ANAPC7	ordinary	22.4668
ATP6V1D	DTYMK	redundant	14.94
PRDX6	GSR	ordinary	17.7272
CPSF6	KL	ordinary	48.6828
ARPC2	FZD4	ordinary	25.9347
SLC9A2	DLG4	ordinary	18.2096
CAD	VAMP2	redundant	28.1227
PSMD8	TNFSF11	ordinary	12.9999
DIAPH2	DSN1	ordinary	15.4586
GCLM	GGCT	critical	14.9151
ATM	GTF2H3	ordinary	15.9004
BRAF	MPRIP	redundant	15.1565
RFC4	PALB2	ordinary	30.8687
ADCY9	PRKAR2B	ordinary	21.7715
ARFGAP1	KDELR2	ordinary	22.4646
HIST2H2BE	NCAPG2	ordinary	18.5046
POLR2C	NELFE	ordinary	12.6976
NUP107	HSPA5	ordinary	14.6525
P2RX4	CLCA2	ordinary	26.6784
EXOSC2	GMPR	redundant	27.0729
PPAT	SLC3A2	redundant	15.3768
RHNO1	RPA2	ordinary	18.6977
MND1	RPA1	ordinary	26.9006
DPAGT1	ALG14	critical	15.5159
WNT5A	DVL2	ordinary	19.6856
CACNA2D3	TPM3	ordinary	17.8677
CACNB3	TMOD1	ordinary	27.1838
PMPCA	HSPA9	ordinary	13.7525
AKAP1	DMD	ordinary	19.3646
SBF2	PPP2R5A	ordinary	12.7287
DNAJC6	AP1S1	redundant	17.6742
ADCY6	PDE11A	ordinary	15.6399
RACGAP1	RHOA	ordinary	20.1951
KAT2A	TBP	critical	16.5729
CCND3	E2F3	ordinary	13.7262
CDK4	E2F2	ordinary	18.195
CD3G	BTK	ordinary	57.3476
SUZ12	H2AFV	ordinary	18.5895
SLC1A5	CTPS1	ordinary	15.8383
GNAI1	NCALD	redundant	12.8439
MTMR3	PPP2R5D	ordinary	13.3664
HIST1H2BD	HIST4H4	ordinary	15.6258
PIK3CD	CYFIP2	redundant	35.4926
PIP5K1A	REPS2	redundant	16.9192
EZH2	H3F3B	ordinary	23.2231
DDAH1	ASS1	ordinary	20.0256
DVL2	NCK1	ordinary	13.7856
PIP5K1C	PDGFRB	redundant	24.2897
RAP1GAP	RAP1A	ordinary	36.8593
PIK3C2G	VAMP7	redundant	21.1471
STIM1	ANXA1	ordinary	25.2591
ARHGAP17	RHOF	ordinary	25.2481
NDC1	SNUPN	ordinary	23.6224
AAAS	RAN	redundant	37.3694
POLR2J	NELFE	ordinary	19.1786
FGFR4	CYFIP2	ordinary	38.7357
PIP5K1C	FYN	redundant	15.9372
P2RX5	CACNB2	redundant	13.9249
AGBL3	VAMP2	ordinary	22.2898
TGOLN2	PIP5K1B	ordinary	47.1838
NME1	ATP6V1A	ordinary	20.8918
EXO1	POLK	ordinary	27.5166
MPC2	PDHA1	ordinary	32.7204
KAT5	CHEK1	redundant	26.0359
CD80	VAV1	ordinary	34.1649
DNA2	FEN1	redundant	46.5341
POLR2D	MDC1	ordinary	20.7728
AAK1	SLC2A8	ordinary	13.3821
PSMC1	BUB3	ordinary	16.7506
TRPC4AP	MYH11	redundant	13.9861
CACNA1C	CPLX1	ordinary	15.1816
ACOT2	ACAT1	ordinary	40.6329
PSMA3	PPP2R5E	ordinary	16.8565
ARPC1A	TFRC	ordinary	15.5591
PSMA7	WTIP	ordinary	17.0695
NEFL	SORBS1	ordinary	27.1239
PPP1CB	PER1	ordinary	16.8846
NUP107	PHAX	ordinary	13.152
CCNB2	PPP2R5B	ordinary	24.6939
PSMB6	RPS27A	redundant	18.8036
NDC1	HDAC4	ordinary	17.291
SUV39H1	HIST1H2BJ	ordinary	13.9819
ARHGAP18	CDC42	ordinary	14.4131
PIP5K1B	CD86	redundant	13.3423
PSMC1	NFKB2	redundant	15.3295
KIF15	HLA-DPB1	ordinary	17.8443
SKP1	AURKA	ordinary	24.1499
SRI	LMOD1	ordinary	20.0841
BLM	FAAP24	ordinary	39.7104
MMP3	COL9A3	ordinary	15.2669
CRTAP	COL1A2	ordinary	24.1949
PPAT	GCLM	redundant	14.7703
CCNB2	CENPL	ordinary	45.6986
LAMA2	HGF	ordinary	26.7293
PSMB3	CDC27	ordinary	17.8288
ATP2B1	TLN1	redundant	14.1236
GGT6	NCALD	ordinary	18.4458
NBN	FANCD2	redundant	16.0781
MTMR3	PITPNM3	redundant	22.1133
USP1	FANCM	redundant	29.3704
BRCA1	UBE2I	redundant	20.5219
LCK	PDCD1	ordinary	17.0667
FAM13B	RHOB	ordinary	18.8082
TRAPPC13	RAB1B	ordinary	18.1483
PIP5K1A	WASF3	redundant	19.2011
GNGT1	PDPK1	redundant	18.4497
DVL3	LCP2	redundant	12.8336
BOP1	UTP3	ordinary	14.1912
CD80	LCP2	ordinary	75.2063
NBN	RPA3	redundant	14.9615
HADHB	CS	redundant	17.537
BTC	SOS1	ordinary	13.5841
PLCB2	DGKD	ordinary	53.2862
PSMA5	FBXL7	ordinary	13.5832
POLR2K	HIST1H4I	ordinary	17.266
ITPR1	RASGRF2	ordinary	46.5314
GALNT15	MUC12	ordinary	16.8641
PSMA3	OAZ1	ordinary	16.7191
SULT1C2	BPNT1	ordinary	15.9498
ALG3	ALG9	redundant	23.5686
ECT2	RHOV	ordinary	27.8408
AGPAT2	ACSL5	ordinary	29.732
BARD1	MNAT1	ordinary	16.4479
RAD51C	RAD51	ordinary	23.5436
ARRB1	VAMP2	ordinary	27.4933
CALM2	P2RX4	ordinary	14.2976
TOMM5	PINK1	redundant	23.5591
RUNX3	TEAD4	ordinary	20.2256
MYO9B	RAC1	ordinary	13.1309
PLCD4	DGAT2	ordinary	16.5025
GNAI1	STIM1	ordinary	14.7242
BRCA1	POLH	ordinary	17.605
GAB2	LCK	redundant	21.6387
DCTN1	NR3C1	ordinary	13.2421
VPS4A	PPIA	redundant	14.0103
PRMT5	H2AFX	redundant	21.2776
NUP85	GEMIN2	ordinary	19.2086
GMPR	ADSSL1	ordinary	23.0924
SLC1A3	NICN1	ordinary	21.901
PSMD7	CDC20	ordinary	26.9632
CACNA2D1	ATP2C1	ordinary	19.7776
CFB	C5	ordinary	15.4561
CCNB1	AHCTF1	ordinary	22.5003
PRKAG2	LAMTOR1	ordinary	13.0518
RHOB	MYH11	redundant	27.835
FOLH1	TTLL7	ordinary	21.5222
PIK3CA	ACTR3	redundant	17.3085
RBX1	HIF3A	ordinary	14.2087
ITPR2	MYH11	redundant	15.1832
CAMK2D	ACTG2	ordinary	15.8772
XRCC1	RFC5	redundant	20.0292
AK7	GNAL	redundant	27.5964
MID1IP1	ELOVL5	ordinary	16.2736
PIP5K1B	MTMR1	ordinary	16.316
CACNB2	STX1A	ordinary	21.3415
HSP90AA1	BAG4	ordinary	14.2561
ENPP1	ACP5	critical	14.4549
CATSPERB	TMOD1	ordinary	22.0633
BCR	CYFIP2	ordinary	36.3266
UBB	BRCA1	redundant	16.5904
DVL1	FGF2	redundant	15.6965
PDGFRA	FGFR1	ordinary	28.7284
CACNB2	CLCA4	ordinary	14.4594
P4HA2	COL5A1	ordinary	13.9586
TREM2	PDPK1	ordinary	21.7942
NDC80	STAG2	ordinary	25.2281
IGF2R	MYO10	ordinary	12.9594
PPFIA3	VAMP2	redundant	19.3905
POLH	XRCC2	ordinary	18.4792
ORAI2	CACNB3	ordinary	12.694
CACNG4	CACNB2	redundant	14.7603
PSMD6	GTSE1	ordinary	21.585
CD79B	PIK3R1	ordinary	13.5567
EXOSC1	FBL	ordinary	20.963
BLM	POLR2E	ordinary	23.1923
SLC6A11	GABRQ	ordinary	15.5151
KIF18A	HLA-DQA2	ordinary	27.0162
PIK3CB	PDPK1	redundant	20.6578
SRSF10	DHX9	ordinary	17.2024
STON1	ACTR3	ordinary	16.3696
BARD1	HMGN1	ordinary	28.6279
GPSM2	CXCL8	redundant	20.8598
CD79A	TRPC6	ordinary	13.5386
CACFD1	VIM	ordinary	12.8662
CCNK	CHEK1	ordinary	24.6324
ABCC9	ATP1B1	ordinary	29.6435
PDE1B	GMPR2	ordinary	28.7671
SLC39A2	KCNJ11	redundant	20.766
ACOT2	HADHB	ordinary	18.2242
ABCB10	HMOX2	ordinary	18.6035
PGK1	GAPDH	critical	34.5784
PSMB5	BUB3	ordinary	19.6093
BTK	ITPR1	redundant	45.7271
RPS15A	FBL	ordinary	33.5692
UAP1	ALG14	redundant	16.6573
PKN1	PPP1R14A	critical	18.6102
MYD88	RHOA	redundant	24.6796
LCK	CTLA4	ordinary	17.4402
PSMD14	REL	ordinary	13.1484
KIF18A	ACTR1A	ordinary	27.2122
DEPDC1B	RHOU	ordinary	36.0378
PSMA4	SPOPL	ordinary	13.2453
SOS1	PAK2	redundant	15.4732
SPCS1	RPS18	ordinary	13.1247
SLC6A1	SLC26A9	redundant	27.2351
MTA3	HIST3H2BB	redundant	29.4613
DBF4	MCM5	ordinary	26.8366
PSME3	CDC20	ordinary	31.6825
ACSL3	ELOVL1	ordinary	18.5669
CDKN2A	RUNX3	ordinary	13.4439
KL	CUX1	redundant	47.6529
PSMC2	LNPEP	redundant	15.6955
CDC42	CENPA	ordinary	22.615
BRCA1	HIST1H2BH	redundant	25.8266
PDCD1LG2	CD3D	ordinary	25.8084
ARHGAP10	RHOBTB2	ordinary	18.5548
PSMB10	TNFSF12	ordinary	16.2797
SPCS3	SEC61G	ordinary	18.649
ATXN7	HIST1H3H	ordinary	14.4627
PPP2R2A	FOXM1	ordinary	17.3048
FZR1	MCM5	ordinary	24.4948
2020-03-02	SLC3A2	redundant	37.9572
ARHGAP4	RHOU	ordinary	24.5967
ORAI2	CALM1	ordinary	16.9385
CAMK2D	MYL9	redundant	18.2531
TRPC4AP	SORBS1	ordinary	27.0417
TDP1	PRKDC	redundant	23.4701
RMI2	FEN1	redundant	51.536
CA13	AQP11	ordinary	24.381
SLC5A6	AHCYL2	redundant	12.6871
FGFR1	CYFIP2	redundant	35.7931
CBFB	LEF1	ordinary	23.5957
PIK3CB	INPP5J	redundant	21.7114
KCNN3	FXYD6	ordinary	13.9571
CCT5	BBS4	ordinary	19.57
ATM	SUMO2	redundant	14.5392
PECR	PHYH	critical	24.1429
HIST4H4	BARD1	ordinary	16.4169
TNFRSF10C	TNFRSF10B	ordinary	17.8658
BIN1	TGOLN2	ordinary	22.93
STON1	SLC2A8	ordinary	16.5612
STARD8	RHOH	ordinary	38.4495
GPSM2	GNGT1	redundant	14.2776
GMPPB	ALG2	redundant	14.9857
CACNA1C	DMD	ordinary	56.0692
PPM1A	PRKAG2	ordinary	17.667
SRC	TRAK1	ordinary	22.3462
DCTN1	AR	ordinary	33.9173
P2RX7	MYL9	redundant	16.6318
CD3E	PRKCQ	ordinary	30.9913
ITPR3	ACTG2	ordinary	15.3688
ALAS1	PDHB	ordinary	25.3115
ATP6AP1	AK9	ordinary	14.1103
HADHB	DBT	redundant	53.0132
STIM1	NEFL	redundant	15.505
TOP3A	GTF2H3	ordinary	18.2721
FNBP1L	SCARB2	ordinary	12.9485
TRPC4AP	CALM3	redundant	13.9824
B3GAT3	BGN	ordinary	12.7261
POM121	INCENP	ordinary	14.7051
SYK	KL	ordinary	45.7255
DCAF11	NEDD8	ordinary	19.275
CDK1	DYNLL2	ordinary	27.558
SLC8A1	CACNA2D2	redundant	24.218
BIN1	VAMP2	ordinary	22.2561
RPA3	RAD51AP1	redundant	30.4929
ITPR1	SLC24A1	ordinary	24.2224
FXYD3	KCNQ1	ordinary	30.3925
CA9	NT5E	ordinary	14.6508
PSMD14	APC	redundant	15.8591
SPCS3	RPS3	ordinary	15.4694
POLR2H	HIST1H4I	redundant	18.6015
IRAK1	MYO18A	ordinary	14.7714
PDGFRA	WASF3	ordinary	20.129
TRPC1	RASGRP4	redundant	17.8018
PRKACB	PPP1R1B	ordinary	37.7334
PSME2	ANAPC2	ordinary	13.9968
RMI1	RFC4	redundant	38.7078
RBL2	CDC6	ordinary	22.5763
GPSM3	GNAI2	redundant	27.0014
RYR2	CACNA1C	redundant	83.1608
RB1	CDT1	ordinary	18.0894
GAB2	MYO18A	redundant	19.5859
EXOSC5	RPS6	ordinary	13.6291
HDAC1	CDK1	redundant	33.1673
CDK1	H3F3A	redundant	30.2646
NFIX	POLR3H	ordinary	15.4155
TCIRG1	AK9	ordinary	24.3542
NME1	IFT122	ordinary	15.4094
SAE1	SUMO3	ordinary	18.5637
CACNA2D2	TMOD3	ordinary	18.1256
POLE2	EXO1	ordinary	60.0103
PSMD10	HNRNPD	ordinary	14.0392
PLD1	PITPNM3	critical	17.5289
ERBB3	SHC1	ordinary	16.3249
AK9	ATP6V1E2	ordinary	16.2861
AKAP9	PLN	redundant	17.0399
DBF4	PRIM1	redundant	33.0905
SUCLG1	HADHA	redundant	25.9191
SEC24C	F8	redundant	19.3831
PDGFRB	PDPK1	ordinary	15.1901
ISG15	KPNB1	ordinary	23.7581
PSMD11	ANAPC1	ordinary	14.6246
STAT2	STAT1	ordinary	58.9909
SAP18	H2AFX	ordinary	15.6736
OSBP	PPM1L	ordinary	12.6488
PSMC4	TRAF2	redundant	17.7098
PPP1R12B	MYH14	ordinary	17.206
COPS7A	DDB2	redundant	13.0559
ADCY1	HCN2	ordinary	16.2426
2020-09-02	PRKAR2B	ordinary	17.9378
NELFB	CHEK1	ordinary	26.7916
PTPN22	HLA-DQB1	ordinary	36.2159
ACOT11	ACSL5	ordinary	22.19
SUDS3	HIST3H2BB	ordinary	20.1876
EXOSC3	NOL6	ordinary	25.6599
SH3KBP1	ITPKB	redundant	17.5329
USP21	IL33	critical	16.1872
PSMA4	PPP2R5B	ordinary	13.7318
VAMP2	P2RX5	ordinary	22.3203
PSMD7	GOT1	redundant	14.7398
GNG7	GAB1	redundant	38.3285
MCOLN3	SORBS1	ordinary	26.8224
AKAP1	LMOD1	ordinary	18.0439
PIP5K1B	VEGFA	redundant	13.5279
DNM1	VAMP4	ordinary	12.7682
PIP5K1B	PPP2R5D	ordinary	13.0782
DIAPH2	SPC24	ordinary	18.1885
MPC1	DLD	ordinary	25.7524
RYR2	ATP2C1	ordinary	27.2607
CDC37	GAB1	ordinary	17.9155
AKAP1	MYL9	redundant	15.3069
STX1A	TRPC1	redundant	13.6691
ATP1B1	SLC3A2	redundant	17.5929
NUP37	HSPA1L	ordinary	13.0865
EXOSC10	WDR75	ordinary	14.1914
PTPN22	HLA-DPA1	ordinary	54.298
SRSF10	SRSF2	ordinary	35.8462
CHRM3	GNAQ	ordinary	23.1716
BRCA1	ERCC6	ordinary	17.447
GSR	GPX2	ordinary	19.622
ARHGAP11A	RHOD	ordinary	24.7764
RAF1	RAP1A	redundant	29.0544
SRI	ATP1B2	redundant	19.2574
GAB2	FCGR1A	redundant	15.304
PSMD11	AJUBA	redundant	26.5974
ERCC2	RAD51D	ordinary	16.2145
PDCD1	HLA-DPB1	ordinary	82.3139
SCNN1B	SLC4A7	ordinary	14.3442
CA2	ATP6V1G1	ordinary	12.8827
SPIDR	BLM	ordinary	23.245
SLC35A1	ST3GAL3	ordinary	14.5998
CATSPER2	DMD	ordinary	17.8269
NUPL2	ALYREF	ordinary	20.2944
SEH1L	SNRPE	ordinary	16.7049
GPSM2	GNAI3	redundant	34.009
BLM	GTF2H3	ordinary	43.8649
INPP5D	ARRB1	redundant	15.0519
ADRB2	PIP5K1B	ordinary	14.7123
CASK	VAMP2	ordinary	19.3949
HLA-DPB1	LCK	ordinary	13.6896
STAT3	ICAM1	ordinary	13.6892
ATR	HIST4H4	redundant	13.8857
EXO1	RFC3	redundant	51.9252
CDK12	FANCI	ordinary	27.0868
ATP1B1	CALM2	redundant	17.2874
SLC7A7	SLC4A4	ordinary	26.454
ERBB2	CYFIP1	ordinary	13.5151
PPP2R1B	BRAF	redundant	12.7408
EXOSC2	NOP58	ordinary	20.7719
BOP1	RRP36	ordinary	17.1919
TRPC1	ACTA2	ordinary	37.1759
CCNB1	BIRC5	redundant	75.7912
ARHGEF7	RHOU	ordinary	22.33
CDK1	SKA2	ordinary	49.7385
BARD1	GTF2H1	ordinary	16.7064
BARD1	HIST3H2A	redundant	20.4881
TIMM17A	HSPD1	ordinary	18.6011
SEH1L	SLBP	ordinary	14.1706
ADCY6	PRKACB	ordinary	41.7936
CDK5	FOXO3	redundant	25.5966
NUP37	SNRPG	ordinary	51.5081
PLEKHG2	RHOH	ordinary	12.9254
ASPH	PLN	redundant	17.6352
PIK3R6	EPN1	redundant	14.5276
CCNB2	PPP2R1A	ordinary	20.2086
NUP188	TOP2A	redundant	25.108
ACADS	ECHS1	critical	48.9212
PIP5K1B	ARRB1	redundant	39.0248
DEGS1	COL4A3BP	redundant	13.2292
SNX9	TGOLN2	ordinary	18.6647
ACOT9	BCKDHA	ordinary	13.8603
RAD50	H2AFX	redundant	16.7556
CALM2	PDE3A	ordinary	14.4849
RYR3	DMD	ordinary	41.8579
NUP62	NCBP1	ordinary	17.6785
ARHGEF28	LIMK1	redundant	40.7615
SLC39A6	S100A7	ordinary	12.713
ANK2	TMED10	ordinary	17.48
RHOC	LIMK1	redundant	17.6337
ARHGEF15	RHOBTB1	ordinary	23.5496
CAMK2D	TLN1	redundant	19.5441
NUP35	HNRNPC	ordinary	37.9839
NUP62	SMN1	ordinary	18.7182
SLC4A2	CA12	ordinary	37.8667
CACNB2	TMOD1	ordinary	66.329
B3GAT3	AGRN	ordinary	12.9895
CBFB	IL2RA	ordinary	21.1723
NME1	AK2	redundant	19.8802
SLC25A28	ISCU	ordinary	18.3934
CACNA2D2	PPFIA3	redundant	18.5781
NCOA2	G0S2	ordinary	15.0216
2020-09-02	TUBB	ordinary	15.8803
AKAP9	CALD1	ordinary	13.0634
SYNJ1	MTMR3	ordinary	15.6175
PSMD14	GTSE1	ordinary	38.9819
ATP1B3	SLC12A7	ordinary	18.7533
PSME4	APC	redundant	12.7606
BOP1	RPS2	ordinary	23.2446
BRIP1	HMGN1	ordinary	17.129
GRB2	INPP5A	redundant	18.7075
CCNB1	CDC16	ordinary	20.9399
GLE1	POM121	ordinary	12.6837
PIK3R6	VAMP2	redundant	30.6433
CSGALNACT2	BGN	ordinary	40.489
PIK3R1	BAIAP2	redundant	13.4097
KIF23	HLA-DQB2	ordinary	30.08
RAF1	ZC3HAV1	ordinary	23.4475
HDAC2	HIST1H2AE	redundant	19.9128
CATSPER2	MYL9	redundant	14.4955
PSMB3	SPOP	ordinary	14.8818
CTNNB1	HIST1H2BH	ordinary	13.3798
BARD1	TCEA1	ordinary	24.8024
RPS3A	NOC4L	ordinary	13.0847
COPS7B	FBXW8	ordinary	22.3515
GPT	KARS	redundant	14.9028
MAPKAPK3	CBX6	ordinary	19.2145
RING1	UBE2I	ordinary	15.1238
NUP43	AURKB	ordinary	27.7264
CACNB2	MASP2	ordinary	20.5631
TRPV6	ATP2A1	ordinary	14.1805
RANBP2	SNRPB	ordinary	16.376
FOXP3	IL2RA	ordinary	33.9761
PDHA1	NAGS	ordinary	13.3081
PCCB	MCEE	ordinary	15.6934
NUP205	HSPA1B	ordinary	14.0416
AAAS	SNRPD3	ordinary	30.7915
AKT2	GSK3A	ordinary	23.0195
RFC3	BLM	ordinary	64.0563
RBM28	UTP6	ordinary	17.0044
USP2	TRAF2	redundant	17.925
PSMD3	ANAPC16	ordinary	25.9921
BLM	FAAP100	ordinary	24.5694
LIG1	CCNH	ordinary	13.8153
CDKN1A	ORC1	ordinary	23.8415
CACFD1	SLC24A3	ordinary	16.5032
CCNB1	SMC2	ordinary	36.0259
MTMR3	PIGA	ordinary	12.7236
GNG7	ATP1B2	redundant	66.25
ELOVL1	SLC25A16	ordinary	17.7607
CACNA1C	CACNB1	ordinary	17.7971
TRPC4AP	CPNE7	ordinary	12.9929
CACNB2	ATP2A1	ordinary	17.4704
INPP5D	AAK1	redundant	13.19
KCND3	ATP1B3	ordinary	15.2757
E2F1	EZH2	redundant	45.8491
PSMA1	REL	ordinary	15.4629
EXO1	NHEJ1	ordinary	23.0548
ATP2B4	TPM3	ordinary	14.7017
CDK1	HIST1H2BG	redundant	31.3202
IL33	CD28	redundant	19.2849
DCTN4	HSP90AA1	ordinary	13.952
NCALD	SLC24A1	ordinary	14.4296
TPI1	GPD1L	ordinary	29.3464
ARHGEF35	RHOU	ordinary	15.4076
COPS6	COMMD2	ordinary	13.4465
PITPNM3	LPIN2	ordinary	17.4955
CACNA2D3	ATP2A2	ordinary	15.1714
AHCYL2	CA12	ordinary	15.5875
DKK2	FZD2	ordinary	25.4136
SLC4A2	GABRQ	ordinary	37.8424
P3H3	COL7A1	redundant	15.5305
CALM2	ORAI2	ordinary	12.9343
TRPV6	MYH3	ordinary	14.9048
SH3KBP1	DGKD	redundant	63.125
BRIP1	RFC1	ordinary	23.8107
PHKB	PYGL	ordinary	13.9094
CD79B	PRKCQ	redundant	16.6805
PTPN6	HLA-DQB1	redundant	14.4607
ATR	FANCM	redundant	24.7218
DNAJC2	HSPA13	redundant	12.7636
FNBP1L	TFRC	ordinary	18.0077
NFIX	POLR3C	ordinary	14.2326
P2RX1	RASGRF2	ordinary	13.1601
KIT	INPP5D	redundant	32.9356
PCNA	RMI2	ordinary	46.2502
GNG4	ATP1B2	ordinary	18.3024
PSMD4	TAP1	redundant	13.0758
PSMA6	TAP2	redundant	18.0717
KIT	FGFR1OP2	ordinary	30.0607
P2RX1	MYL9	redundant	19.8546
PSMB10	CDK1	redundant	24.711
ATP1B3	KCND3	ordinary	15.2757
HIST4H4	HIST1H3D	ordinary	26.7115
DLG4	TPM2	ordinary	31.0739
BLNK	ITPR1	redundant	26.4044
RPA1	XRCC2	redundant	31.7114
ATP6V1B1	AK9	ordinary	20.7535
DAB2	CD3D	ordinary	14.5729
AKAP13	RHOA	ordinary	13.2533
AGBL5	GLUL	ordinary	28.7098
KAT2A	TAF1D	redundant	18.7256
CDC27	CXCL8	ordinary	22.5046
POLR2L	ATM	ordinary	20.3676
B2M	KL	ordinary	46.9807
ADCY3	PDE7B	ordinary	21.7689
ADCY5	PRKAR2B	ordinary	86.5813
AKAP1	PRKCA	redundant	17.5634
TP53	BID	redundant	13.3832
ACTB	XPC	ordinary	14.3347
KL	VAV1	redundant	51.2558
PSMA4	LTBR	ordinary	19.5852
BRIP1	XRCC5	ordinary	22.6921
COX6C	CYCS	ordinary	15.7522
AGPAT2	LPIN2	ordinary	16.3593
PSMB2	TNKS	ordinary	12.7592
NEK9	NUP214	ordinary	15.1366
AADAT	AASS	ordinary	17.1339
EPHB4	EFNB3	ordinary	16.119
NEFL	DMD	ordinary	18.7529
PPP1R12B	MYL9	redundant	135.804
PYGO2	H2AFZ	ordinary	18.4125
NSMCE1	UBE2I	ordinary	28.7723
CSF2RB	STAT5B	ordinary	17.7836
ATP1B3	SLC1A1	redundant	17.5197
LRP5	FZD4	redundant	19.801
SUCLG2	PDHA1	redundant	51.7854
SYNJ2	MTMR6	ordinary	22.0004
PSMA7	RBX1	redundant	20.2792
PSMB3	GTSE1	ordinary	31.0757
NUP155	ALYREF	ordinary	26.621
TTC21B	PDE8B	ordinary	21.5768
ATP1B2	SLC5A3	ordinary	18.2526
APP	SORBS1	ordinary	30.0595
HLA-DQB2	PRKCQ	ordinary	13.4121
PSMB9	CDK1	redundant	30.7844
PPP3R1	YWHAE	ordinary	15.2158
PSMD14	LTBR	ordinary	16.0111
SYNJ2	PPP2R1B	redundant	17.6641
RAF1	BCL2L11	ordinary	26.6709
SPCS3	RPL21	ordinary	14.8472
LIG1	RPA1	redundant	26.0517
WRN	RFC5	redundant	14.1732
ESPL1	CENPO	ordinary	28.0632
IL1RAP	CD86	ordinary	14.7185
BARD1	POLD1	redundant	26.7652
CBFB	TNFRSF18	ordinary	28.9841
TOMM5	TOMM40	redundant	24.7391
RAE1	GEMIN4	ordinary	15.4803
MYO9A	RHOBTB1	ordinary	25.8191
TREM2	MYO18A	ordinary	16.3662
AAK1	PLEKHA1	ordinary	15.8383
CCNB1	BUB1B	ordinary	63.5138
BAZ1B	H2AFZ	ordinary	17.3109
GNAQ	TRPC6	redundant	25.5066
CACNA2D3	PXN	ordinary	14.0294
RFC3	RMI1	ordinary	28.6508
PSMC6	TAP2	redundant	12.8299
PSMB4	UBE2D1	redundant	17.0923
CACFD1	CALM2	redundant	20.9092
SLC12A2	ANO9	ordinary	13.0815
RPS3A	NOP58	ordinary	13.8232
NDC1	HSPA12B	ordinary	15.9284
KL	KRAS	redundant	47.1037
BLM	TCEA1	ordinary	30.9221
CACNA2D2	NEFL	redundant	16.2996
CHEK2	BRCA1	redundant	46.3376
PSMB1	CDK2	redundant	24.6641
POLD2	BRCA1	ordinary	30.4721
HLA-DPA1	PRKCQ	ordinary	20.4747
SIK1	PER1	ordinary	15.0926
SLC4A4	SLC12A2	redundant	21.5632
CACNB2	TRPC1	redundant	28.6713
RMI1	POLE3	redundant	46.1179
STIM1	TPM4	ordinary	12.7331
GTF2H5	POLR2J	ordinary	14.4528
LIG1	PCNA	redundant	47.0266
NUP93	FIP1L1	ordinary	17.4424
SAP30L	HIST1H2BD	ordinary	13.3133
KAT2A	NOTCH1	redundant	15.6351
PSMA4	CDK2	redundant	37.0521
CTPS2	PCYT1A	critical	12.6653
HLA-DQA1	ZAP70	ordinary	42.9093
COPS7B	SKP2	ordinary	21.2105
BLM	UVSSA	ordinary	24.1762
BRIP1	POLK	ordinary	22.477
GNB2	FCGR3A	ordinary	12.6209
SLC4A3	SLC12A4	critical	17.6957
SH2D2A	SHC1	ordinary	13.6725
CLASP2	STAG2	ordinary	13.2377
PSMB4	TNFSF12	ordinary	17.517
RRP1	NOC4L	ordinary	17.374
PSMC3	TNFRSF12A	ordinary	13.6153
P3H1	COL7A1	redundant	34.4695
PSMC3	UBE2C	ordinary	46.1521
DEPDC1B	RAC1	ordinary	23.9037
EXO1	POLR2D	redundant	42.0365
CCNB1	HIST1H2BJ	redundant	27.5816
CALM3	DMD	ordinary	18.4744
HIST1H3G	NCAPD3	ordinary	28.4289
MCM8	POLE	ordinary	47.6808
PLCH1	CALM3	ordinary	24.3033
PAPSS1	MAPK3	redundant	13.2452
AP2A2	PIP5K1B	ordinary	18.6424
PIP5K1A	GNAO1	ordinary	22.9329
CCNB2	NUP35	ordinary	31.2078
FGFR1OP	INPP5J	ordinary	25.1236
NUP37	HSPA5	ordinary	15.4839
SH3KBP1	WNT5A	redundant	15.1701
ATR	ORC6	ordinary	33.4405
SLC9A3	GRIN2D	ordinary	14.8063
RAD50	UBA52	redundant	13.3505
CCNB1	ZW10	ordinary	24.5985
CLTA	TFRC	redundant	15.7319
ATP1B3	HCN3	ordinary	12.8542
IL1R1	IRAK1	ordinary	12.9338
PSMD10	BUB1B	ordinary	31.6078
ATM	RFC3	redundant	21.557
PIP5K1A	GNG7	redundant	25.6251
NAGS	DBT	ordinary	41.9596
ATP1B3	KCNMB1	ordinary	24.3161
POLD1	RAD51AP1	ordinary	40.1066
PIK3C2G	STAM2	redundant	28.5805
FAM20A	MIA3	ordinary	18.4444
FCGR1A	FYN	ordinary	20.3793
RAD50	BARD1	redundant	22.0072
ATR	FANCD2	redundant	18.7874
NAA30	MORC2	ordinary	13.7717
PSME1	TNFSF13B	ordinary	21.9629
NUP205	NCBP1	ordinary	18.8393
CACNB2	S100A7A	redundant	21.0003
PYGO2	HIST3H2BB	ordinary	13.8932
RXRA	ACOX1	redundant	13.5931
MMP7	LAMC2	ordinary	13.9878
REEP5	GNGT1	ordinary	16.5996
EZH2	H2AFZ	ordinary	34.7897
TNKS2	PTEN	ordinary	24.217
RAF1	SCNN1G	redundant	33.9114
DNMT3B	H2AFX	ordinary	29.8728
DNM3	TFRC	ordinary	13.5258
CYB5B	AIMP1	ordinary	18.7103
IL1RL1	FCGR1A	ordinary	13.1806
RYR3	ACTA2	ordinary	17.7915
ECT2	RHOA	ordinary	26.2669
NFIA	POLR3C	ordinary	13.3679
POLE3	ATM	ordinary	13.4759
PSME3	UBE2C	ordinary	32.7333
GNG7	INPP5B	redundant	30.3092
CD247	CD28	ordinary	69.3163
RAF1	KSR2	ordinary	22.8982
RAE1	WDR33	ordinary	24.4197
PPAT	GART	ordinary	25.4041
ATP1B3	SLC22A5	ordinary	17.3719
NUP107	SNUPN	ordinary	12.6343
AP2A2	TFRC	ordinary	15.6746
SYN1	VAMP2	ordinary	23.281
HLA-DQB1	PRKCQ	ordinary	15.4337
POLE2	RAD51B	ordinary	46.8699
GNAZ	ITPKA	redundant	22.7761
HLA-DQB1	CD247	ordinary	54.0601
CLCN3	GABRB3	ordinary	14.136
EXO1	FAAP24	ordinary	38.9377
FZD2	CSNK1A1	ordinary	18.9349
HADHA	ALDH6A1	ordinary	56.0132
TBL1XR1	ACADM	redundant	17.1427
POLB	PARP2	ordinary	12.7686
SLC24A3	STIM1	ordinary	14.8811
CD3D	PRKCQ	ordinary	27.8734
SPTSSA	ACSL3	ordinary	20.9066
PYCARD	IL1B	ordinary	14.6185
CACNB1	UNC13B	redundant	17.9983
SPIDR	XRCC2	ordinary	23.5847
PLD2	PITPNM2	redundant	14.0432
ACTL6A	CUL4A	redundant	15.8143
PTPN6	STAT2	redundant	13.7186
PIP5K1C	AXL	ordinary	19.1231
DVL1	STAM2	redundant	13.0212
DVL2	GNA14	redundant	16.3749
IDH3A	ADHFE1	ordinary	23.1615
GALNT10	MUC1	ordinary	29.4148
POLK	BRCA1	ordinary	24.7424
PSMC2	TNFRSF12A	ordinary	19.5538
FAM20A	CHRDL1	ordinary	21.8328
COPS7A	DTL	ordinary	23.8256
NUP93	SUMO1	redundant	17.83
CLCN3	SLC26A9	redundant	31.3724
CCNB2	RAE1	ordinary	39.5412
ICOS	KL	ordinary	51.8793
MASP1	C4A	redundant	39.8653
ARID4B	HIST3H2BB	ordinary	17.86
AP2M1	ROR1	ordinary	29.4573
DVL2	ARPC5	redundant	15.9057
GNAI1	PRKAR2B	ordinary	13.938
CHST15	BGN	ordinary	17.9774
RPS27	RRP9	ordinary	15.0095
SH2D2A	LAT2	ordinary	14.8736
CNTRL	CD86	ordinary	13.0835
EXOSC8	WDR43	ordinary	17.9554
SLC24A3	CACNB2	redundant	14.0988
DENND4A	CHM	ordinary	12.9102
AK9	GNAI3	redundant	21.2118
PPAT	TTLL4	ordinary	20.4853
ERCC3	FANCI	redundant	29.1678
PSMC2	GTSE1	ordinary	39.2697
BTK	DGKD	redundant	49.2088
PIP4K2A	GNGT1	redundant	14.9846
NUP107	KPNA4	ordinary	14.8571
PIK3R5	BTK	redundant	111.716
CACNA2D2	CALM2	redundant	19.9412
PSMD2	BUB3	ordinary	18.9688
CDK1	LPIN3	redundant	28.9716
SPCS3	RPL38	ordinary	19.7917
HIST1H2BJ	SUMO1	ordinary	12.8226
CDK5	PRDX1	ordinary	19.3016
RANBP2	HSPA14	redundant	13.6654
CCNB2	RANGAP1	ordinary	35.8432
PSMB2	PPP2R5C	ordinary	14.5522
AHCYL1	TPM2	ordinary	19.3085
PSMC2	UBE2C	ordinary	40.3155
VAMP2	CACNG4	ordinary	20.6538
RFC3	CHEK1	ordinary	47.9973
CACNB3	DMD	ordinary	23.3852
PSMB3	RPS27A	redundant	17.2012
NUP188	SNRPG	ordinary	24.2752
GNAZ	PDE4B	ordinary	23.332
PSMC4	PRICKLE1	ordinary	12.9879
HIST1H2AE	HIST1H3D	ordinary	36.6773
NUP155	HSPA13	redundant	20.0791
LEO1	HIST1H2BG	redundant	14.7249
RAD1	CHEK1	ordinary	30.0312
ISG15	UBA52	redundant	19.9954
HIST2H2BE	H2AFX	ordinary	14.8783
RYR1	TPM2	ordinary	19.9092
GPSM1	GNG7	redundant	25.095
CD86	VAV1	ordinary	25.5986
GNPDA1	PFKP	redundant	16.5406
GNG5	FGFR4	ordinary	12.7845
PLCD4	CALM2	redundant	17.39
SMPD4	COL4A3BP	redundant	16.2121
GNAZ	IQGAP1	ordinary	25.4548
PSME2	UBE2D1	redundant	20.1178
SLC4A4	SLC6A20	ordinary	22.5757
NDC1	AURKB	ordinary	46.5352
PSMA7	CUL2	ordinary	14.6255
CDK11A	NEK2	ordinary	26.3309
DCTN3	AR	ordinary	33.275
RELB	NFKB2	ordinary	73.5544
BRAF	FAM114A2	redundant	16.6467
FGF2	CYFIP2	ordinary	43.4407
PDCD1LG2	HLA-DPB1	ordinary	25.469
NCALD	CACNA1C	redundant	36.3877
CACNA2D3	ACTG2	ordinary	12.7793
SH2D2A	FCGR2A	ordinary	21.8764
CACNA2D2	RASGRP4	redundant	16.8627
ARID4B	HIST1H2BG	ordinary	14.2105
SGIP1	DAB2	ordinary	38.0202
PIK3C2G	M6PR	redundant	23.6578
ARF4	KDELR1	ordinary	13.8161
BRIP1	FANCM	redundant	47.1808
KL	NRAS	redundant	47.8782
RGS3	GNA11	ordinary	13.5148
PIK3C2B	REPS2	redundant	45.8932
SUPT7L	HIST1H3H	ordinary	16.7797
NUP93	XPO1	ordinary	32.9815
TRRAP	HIST3H2BB	ordinary	13.7224
EME2	BLM	ordinary	25.2696
BLM	XRCC6	ordinary	37.8069
POLK	RAD51B	ordinary	16.1351
TWISTNB	H2AFX	ordinary	19.9667
CKAP5	STAG2	ordinary	23.9763
MPC2	PDHB	ordinary	31.8785
BAG4	FCGR3A	ordinary	13.8283
PRKAB2	ATG14	ordinary	28.4693
SUCLG2	DLST	redundant	39.0748
KIT	FGF2	redundant	49.8777
YWHAG	RAB8A	ordinary	15.2083
PSMB4	CSNK1A1	ordinary	18.2098
B3GNT4	ACAN	ordinary	15.6899
PIK3CD	CD80	redundant	30.6618
SLC12A2	KCNJ15	ordinary	15.4038
P4HA1	COL4A3	ordinary	21.59
RAF1	MPRIP	redundant	27.7959
HRAS	TLN1	redundant	23.4698
MASTL	ARPP19	ordinary	19.169
PIP5K1C	PIK3R5	ordinary	15.8704
CACNB4	CACNB2	redundant	22.5193
CSNK2A1	SMC4	ordinary	13.3652
NUP160	KPNA5	ordinary	12.9919
ERCC4	RMI1	redundant	19.2565
NUP54	AURKB	ordinary	28.1803
KL	LCP2	redundant	48.7353
NCOA1	FHL2	redundant	13.6468
GTF2H1	POLR2H	redundant	12.8623
DVL3	B2M	ordinary	12.8581
PSMD14	WTIP	ordinary	13.905
FKBP1B	PLN	redundant	22.2979
ATP1B2	SCN8A	ordinary	18.7397
PI4K2A	FZD4	redundant	26.0989
SPCS3	RPL18A	ordinary	13.7797
ICOS	SOS1	ordinary	12.9043
FKBP1B	MYL9	redundant	17.5787
EXO1	GTF2H2	ordinary	21.3983
ARHGAP10	RHOH	ordinary	14.9165
CHEK2	TP53BP1	redundant	27.4084
PSMB9	CCNE2	redundant	12.7275
FNBP1	VAMP8	ordinary	12.6265
GPR161	PDE1C	ordinary	24.6215
PSMB10	GTSE1	ordinary	22.0034
PSMD1	TRAF2	redundant	14.3528
PPM1K	BCKDHB	ordinary	37.2142
IL33	INPP5D	redundant	13.3212
BLM	RFC2	redundant	42.9607
FAAH	CYP1B1	redundant	18.8071
SLC5A6	PANK1	ordinary	19.2813
ITPR1	RASGRP1	redundant	24.3325
ZCCHC11	EIF4A3	ordinary	13.7167
PSMA7	FZR1	redundant	15.2437
SLC22A15	ATP1B2	ordinary	15.352
PSMD11	SKP2	ordinary	28.3591
PDK4	PDHB	ordinary	42.5865
ISG15	KPNA1	ordinary	18.9279
CATSPER2	CACNA1C	redundant	13.1309
F8	SEC24B	redundant	19.9237
SMC4	NCAPG2	ordinary	37.2711
TAF1D	H2AFX	ordinary	17.8872
CALM2	F10	redundant	15.9548
PSMC6	UBE2C	ordinary	29.0092
CDKN1C	RBL1	redundant	24.4505
P3H1	COL9A3	ordinary	12.8158
AKAP9	TMOD1	ordinary	22.6076
CACNB2	CACFD1	ordinary	22.3576
IL1RL1	FCGR2A	ordinary	16.9099
USP21	HIST3H2A	redundant	20.06
EHMT2	HIST1H2BN	redundant	24.7863
PSMA7	TNF	ordinary	17.5814
COPS6	DTL	ordinary	31.3434
CACNA2D2	MYH3	ordinary	20.738
CATSPERB	DMD	ordinary	19.0402
PPP1R12B	MYH10	ordinary	17.3885
PPA2	MCCC2	ordinary	12.7795
NUP155	INCENP	ordinary	29.2529
NUP133	CPSF2	ordinary	17.0126
GPT2	GOT2	redundant	43.9321
ACTL6A	HIST1H4H	redundant	21.674
MCOLN2	LMOD1	ordinary	16.6021
SLC1A3	TTLL7	ordinary	18.0448
NUP62	RAN	redundant	24.9638
EXO1	GTF2H3	ordinary	52.7298
ATP6V0E2	NME1	redundant	21.2551
HADH	HMGCS2	ordinary	24.2141
MAP2K6	CDH2	ordinary	35.7447
FCGR3A	WASF2	ordinary	13.8526
IFT140	PDE7B	ordinary	18.5004
PSME2	RBX1	redundant	16.7368
TRPV3	MYL9	redundant	16.0123
SCNN1D	ATP1B2	ordinary	17.1713
CD86	WASF3	ordinary	23.893
DVL2	NTN1	ordinary	17.0859
BCAT2	ADHFE1	ordinary	28.7965
BMP1	LAMC2	ordinary	41.9447
CAPZA1	HSP90AA1	ordinary	15.354
AAK1	PIP5K1A	ordinary	14.9056
H2AFZ	HIST1H4H	ordinary	12.6813
REPS2	SLC2A8	redundant	19.81
ZNRF3	FZD8	ordinary	14.1563
SUPT4H1	FANCD2	redundant	13.1019
SUPT4H1	POLR2D	redundant	16.2295
SOD1	PRDX5	redundant	12.8186
GNG11	CD247	ordinary	16.9526
PSMB3	CDC20	ordinary	35.0838
GNAL	PDE8A	ordinary	27.2079
PTPN11	SOS1	ordinary	18.8698
PLCB1	DGKA	ordinary	14.6185
PSMA5	NFKB2	redundant	15.8443
BRCA1	REV1	ordinary	21.2786
RFC3	KAT5	ordinary	19.4073
HRAS	RAP1A	redundant	16.8564
USP49	HIST3H2BB	ordinary	13.4706
CACNA1C	TPM2	ordinary	68.1868
EXOSC6	DCAF13	ordinary	14.1663
CACNB1	SLC8A1	ordinary	13.8841
ATP6V1A	AK9	ordinary	16.276
STON1	CD4	ordinary	17.0091
SPCS1	RPL3	ordinary	13.3747
PSMB5	CDC26	ordinary	12.991
P2RX5	UNC13B	redundant	14.0132
CACNA2D1	DMD	ordinary	24.9488
RPA1	RAD51C	redundant	12.7175
CEP63	AURKA	ordinary	21.8981
ARF5	SEC22B	ordinary	15.2086
PSMC1	CDC20	ordinary	29.3557
SYDE1	RHOJ	ordinary	18.2863
LDLRAP1	ARPC1B	ordinary	13.2917
RYR2	CACNB3	ordinary	30.507
CISH	STAT5B	redundant	20.2229
RPS13	RPS7	ordinary	30.7049
KCNJ15	ATP1B3	ordinary	24.8082
ATP6V0E2	SLC25A4	redundant	87.8454
CHKA	PCYT2	critical	19.2036
ITPR1	PPFIA1	ordinary	28.3759
ADCY9	PDE7B	ordinary	26.2108
PSMA3	CDC20	ordinary	36.475
CLIC2	LMOD1	ordinary	22.6292
NLK	AXIN2	redundant	12.8727
BRIP1	GTF2H3	ordinary	33.4694
PSMC5	MAD2L1	ordinary	23.5665
PDCD1	CD3D	ordinary	125.871
SLC5A1	AHCYL2	redundant	34.9337
COPS7A	SKP2	ordinary	16.0616
ATP1B2	KCNN4	ordinary	16.3529
NUP93	INCENP	ordinary	21.5284
LEF1	H3F3A	redundant	13.2105
NUP62	SP100	ordinary	14.1195
EXO1	HMGN1	ordinary	26.5327
CACNA2D4	TPM3	ordinary	13.4004
CDK1	CENPH	ordinary	53.7791
PPIB	COL10A1	ordinary	19.8483
LDLR	TFRC	ordinary	14.8296
ACTR5	RAD23B	ordinary	14.3797
SRC	YWHAB	ordinary	20.2426
RYR2	TMOD1	ordinary	95.8486
RNF8	H2AFX	ordinary	14.694
MVD	FDPS	redundant	33.4098
ACSL3	SPTLC3	ordinary	19.2834
CHMP6	GABARAPL1	ordinary	19.7429
CAMK2D	DMD	ordinary	23.4885
LPCAT3	SLC25A16	redundant	18.2422
SLC20A1	ATP1B2	ordinary	20.6487
KIF22	HLA-DQB1	ordinary	21.4592
CATSPERG	SLC24A1	ordinary	15.3003
SMC6	SMC3	redundant	25.2546
PSMD14	RPS27A	redundant	14.2223
CIAO1	BRIP1	redundant	15.6404
PIK3R6	KL	redundant	46.7824
XYLT2	DCN	redundant	69.343
SLC25A4	ATP6V0E1	ordinary	59.5564
RBM28	UTP20	ordinary	16.3183
KCNIP4	ATP1B3	ordinary	14.3968
PSMD4	UBE2C	ordinary	45.8902
PSMA7	RELA	redundant	14.1056
PSMD11	OAZ2	ordinary	14.4228
SCNN1A	ATP1B2	ordinary	17.4886
NUP210	AURKB	ordinary	26.9816
TRPV6	PLN	redundant	23.5199
DBF4	POLE4	redundant	14.2506
TFDP2	ORC1	ordinary	20.5486
MMP1	NID1	ordinary	13.3878
POM121C	ALYREF	ordinary	19.4779
FXYD6	KCNK6	ordinary	12.8688
PSMA6	CDC27	ordinary	18.4278
TWISTNB	HIST1H2AC	ordinary	13.4333
CCNB1	DYNC1I1	ordinary	22.4374
DLG3	STX1A	ordinary	16.0129
SAP30	H2AFX	ordinary	13.6112
PIK3AP1	INPP5J	ordinary	24.0541
POLE	BRCA2	ordinary	28.489
ACOT8	SCP2	ordinary	12.604
CD86	RAC1	ordinary	13.1265
SRI	AHCYL2	redundant	13.3622
SPDL1	DIAPH2	ordinary	17.1672
SLC38A2	SLC4A4	redundant	16.267
PSMB7	ANAPC16	ordinary	24.1927
SUCLG2	CPT2	redundant	66.7042
PCNA	BRIP1	ordinary	42.4073
NUP210	TOP2A	redundant	22.4136
CERS2	ATAT1	ordinary	13.0449
PIP5K1B	CFTR	redundant	15.6265
STARD8	RHOA	ordinary	18.1863
SLC24A3	CACNA1C	redundant	12.7637
SPTAN1	HRAS	redundant	23.2375
CACNA1C	TRPV3	ordinary	15.4731
PRKG2	KCNMA1	ordinary	49.1337
ATP6V0C	DTYMK	redundant	12.6416
GPS1	DTL	ordinary	25.7271
RMI2	GTF2H5	ordinary	15.6294
PSMB4	HNRNPD	ordinary	16.8827
EPS15	ARPC1B	ordinary	19.738
ORAI1	TLN1	redundant	16.6456
PSMA3	UBE2C	ordinary	42.4506
KIF20A	ACTR1A	ordinary	22.3234
HEXB	GUSB	ordinary	15.8088
CACNB2	S100A7	redundant	21.8965
TTC21B	AKAP5	ordinary	13.5556
CCNB2	CDCA8	ordinary	63.5641
CRTAP	COL5A2	ordinary	23.8072
EXOSC10	UTP14A	ordinary	13.6209
ITPR1	MYL12A	ordinary	24.7395
COASY	SLC25A16	ordinary	17.4473
CCNT2	BRCA1	ordinary	20.2434
DIAPH2	CENPE	ordinary	22.5548
EXOSC7	DDX49	ordinary	14.5792
PAK2	MYL6	redundant	15.3215
NME1	CALM2	redundant	26.9778
ADCY5	PDE7B	ordinary	51.2162
NUP35	GEMIN2	ordinary	19.088
SGK1	SCNN1G	ordinary	20.4553
COPS2	ASB1	ordinary	15.219
PEBP1	AGTRAP	redundant	14.0116
CALM1	ACTA2	ordinary	19.6229
CHD9	G0S2	ordinary	16.1407
AK9	ATP6V0A1	ordinary	19.1473
RRAGC	ULK1	critical	24.904
NME1	ADCY6	ordinary	22.449
CA2	ATP6V1H	ordinary	17.6618
ZMYM2	SOS1	ordinary	21.2409
TIAM1	RHOV	ordinary	20.2713
PACSIN3	TFRC	ordinary	17.8178
PSMC3	HNRNPD	ordinary	13.156
CHMP4B	PPIA	redundant	13.0378
CLNS1A	SNRPE	ordinary	24.2335
FURIN	MMP14	ordinary	14.0776
ATM	MAD2L2	ordinary	13.7497
CA2	TCIRG1	ordinary	14.151
SACM1L	PITPNB	ordinary	17.2576
SLC39A7	MT1X	ordinary	15.991
CCNB2	AURKB	ordinary	81.5201
TFRC	ACTR2	ordinary	17.6201
EPN1	VAMP8	redundant	19.8836
ATP1A3	KCNJ11	redundant	30.8228
PIK3CB	GAB2	redundant	12.6638
BOP1	MPHOSPH10	ordinary	14.8281
CACNA2D2	DES	ordinary	23.2
GTF2H1	CHEK1	redundant	21.1699
ERBB3	FCGR3A	ordinary	13.8507
PRKAB1	RRAGC	ordinary	24.5117
P3H3	COL12A1	ordinary	34.8578
CDC20	STAG2	ordinary	26.0457
SEC16A	SEC24A	redundant	20.1765
ARF5	COPE	ordinary	13.2532
BOP1	DDX49	ordinary	23.7429
ACOT9	PDHA1	ordinary	31.3056
HIST4H4	BRCA1	ordinary	20.0383
PRKAG2	TBC1D1	ordinary	19.0237
GNGT1	RASGRP2	redundant	14.2006
TRPM6	ACTA2	ordinary	12.8249
KL	INPP5D	redundant	49.4231
PSMB3	RELB	ordinary	17.2327
PSMA6	TNFSF12	ordinary	19.204
TPR	SNRPF	ordinary	14.5477
PIP4K2A	STON1	redundant	13.9042
WNK2	SCNN1G	ordinary	14.6156
AK8	ADCY5	ordinary	18.258
TFG	CTSZ	ordinary	13.9716
BARD1	PCNA	redundant	29.4449
BIN1	TFRC	ordinary	15.4501
SLC39A6	KCNJ11	ordinary	24.19
CTSA	SLC17A5	critical	18.1452
HEXA	GUSB	ordinary	24.0088
SRI	PLN	redundant	20.6201
ICOS	INPP5J	ordinary	24.0648
MCM6	POLE	ordinary	52.2971
GABRQ	SLC12A2	ordinary	13.8111
P3H3	COL6A3	ordinary	32.4901
CDK1	ANAPC1	ordinary	31.418
PIP5K1B	FZD4	redundant	28.6653
SLC8A1	SPARC	ordinary	19.0351
PI4K2A	SH3GL1	ordinary	14.8616
OCRL	VAMP7	redundant	17.5318
COPS8	DCAF13	ordinary	15.4608
MOCS2	GPHN	critical	14.4087
PIK3R5	FGF2	redundant	16.8888
FCGR1A	LAT2	ordinary	24.9433
PLCD3	DGKD	ordinary	60.842
RAE1	SNRPD1	ordinary	25.5168
EXOSC2	DDX49	ordinary	26.6421
ATP2B1	CACNB2	redundant	13.4424
CHST3	BGN	ordinary	15.7098
PIK3R1	SOS1	redundant	24.0798
RAC1	RALA	ordinary	19.2027
TP63	BBC3	ordinary	16.2218
CCNB2	PPP2R5C	ordinary	19.7624
AK2	ARL2	critical	14.7834
NAA30	ACSL3	ordinary	17.7129
PSMC2	RBX1	redundant	13.2821
BLM	NHEJ1	ordinary	23.7633
BRAF	AGK	ordinary	17.8641
MMP9	COL16A1	ordinary	35.3502
SLC3A2	DARS	redundant	17.917
PSMD3	CDC26	ordinary	17.5511
AKAP9	TPM2	ordinary	16.1303
PSMD2	TNF	ordinary	12.8979
P4HA3	COL4A3	ordinary	26.3463
SHMT1	ALDH9A1	critical	16.5563
TULP3	PDE2A	ordinary	23.3663
PSMB2	TAP2	redundant	22.1097
HSP90AA1	SOS1	ordinary	13.8039
PSMA7	CCNE2	redundant	18.4047
ARHGAP24	RHOU	ordinary	39.1497
NLRC3	TMEM173	ordinary	31.6766
FXYD6	ARL6IP5	redundant	13.6115
PDE2A	AMPD2	ordinary	23.3086
PPP2CA	BANF1	ordinary	13.0388
PDGFA	FGFR1	ordinary	22.7112
VAMP2	PLEKHA2	redundant	18.5356
DVL3	FGFR4	redundant	15.1933
POLR2I	ATR	ordinary	13.7072
PSMA7	UBE2E1	ordinary	18.854
PIK3C2G	CLTC	ordinary	22.6035
PIK3CB	VAMP2	redundant	18.0249
TRPV6	ACTA2	ordinary	18.909
TRIP10	RHOBTB1	ordinary	14.5259
PLCD3	INPP5J	ordinary	20.6841
P4HA1	COL1A1	ordinary	16.2397
ZDHHC2	SLC25A16	ordinary	18.4538
PLCG2	PRKCB	redundant	20.4108
CNIH3	SAR1B	ordinary	23.6878
FGF2	NCKAP1L	ordinary	14.9362
OXCT1	HMGCS2	redundant	18.0387
SLC39A10	C1QBP	redundant	13.3198
VAMP4	PIP5K1A	ordinary	16.9028
CALM2	TLN1	redundant	17.8206
PIP5K1B	FNBP1L	ordinary	34.0707
HSPH1	HSPA6	ordinary	70.2167
GNAI2	PRKACB	ordinary	39.0664
RBX1	AURKA	ordinary	26.1123
AK9	ADCY2	ordinary	18.7904
GNG11	CD28	ordinary	25.1975
DVL3	PDPK1	redundant	15.9816
PSMA6	LNPEP	redundant	15.9059
CACNA2D1	CACNA2D2	redundant	19.7697
POLR2K	HIST1H3G	ordinary	15.5819
AK9	CALM2	redundant	24.8949
CCNB2	STAG2	redundant	27.1049
TRPV3	ACTA2	ordinary	14.9727
ARRB1	CFTR	ordinary	25.2178
POLE2	DNA2	ordinary	53.4237
CALM2	SORBS1	ordinary	30.1031
PSMC3IP	HIST3H2BB	ordinary	13.1432
FANCD2	RAD51D	ordinary	16.0884
BRCA1	POLR2J	ordinary	25.5255
PEBP1	FAM114A2	redundant	14.0599
PSMB2	CDK1	redundant	42.9669
SLC25A32	TYMS	ordinary	23.0133
RUVBL1	H2AFX	redundant	36.8441
IDH2	AADAT	redundant	23.8007
MCOLN2	TPM2	ordinary	15.8736
CD28	FCGR3A	ordinary	41.2928
TAOK1	STAG2	ordinary	19.8283
IFNGR1	STAT1	ordinary	14.2995
ATP1B2	KCNE3	ordinary	15.7983
WRN	POLQ	ordinary	22.5842
PIK3R5	CD3D	redundant	65.6298
CACNA1A	CPLX1	ordinary	24.3274
RYR2	TPM3	ordinary	32.7949
CDK11B	CDK1	redundant	24.6172
WWP1	SCNN1G	ordinary	18.9478
CCNB2	CENPF	redundant	57.8984
PSMD6	UBE2D1	redundant	23.4397
CDK1	HIST1H2AE	redundant	31.8767
PSMA3	TNF	ordinary	13.6038
COLGALT1	COL8A2	ordinary	17.7775
FGFR3	BAIAP2	ordinary	23.0411
AMACR	ACOX3	ordinary	19.1172
SEC24D	F5	ordinary	13.0142
PIP5K1B	PPP2R1B	redundant	16.4478
LIG1	ERCC3	ordinary	33.9137
GNAS	PDE2A	ordinary	21.1262
RYR2	ATP2C2	ordinary	25.0026
TBL1XR1	TRIB3	redundant	13.6225
MAT2A	HNMT	ordinary	14.4585
POLR2H	HIST1H2BH	redundant	24.6044
NOD2	MAP2K4	critical	21.2101
GSK3B	ZNRD1	ordinary	14.2014
PSMD14	CDC20	ordinary	42.2106
TREM2	SOS1	ordinary	14.4111
INPP5J	SYNJ1	redundant	19.0403
PSMC3IP	H2AFX	ordinary	36.2188
CTSS	HSPG2	redundant	13.025
CDKN1B	MCM5	ordinary	18.3087
BRIP1	APEX1	ordinary	24.7097
ERAP1	TAP1	redundant	15.9366
NUP107	NCBP1	ordinary	14.5802
CDK1	POM121	ordinary	24.4185
NDST1	GPC1	ordinary	12.7558
DNAJC2	HSPA6	ordinary	15.5348
CRLS1	ACAT1	redundant	55.3406
TPCN1	TPM2	ordinary	16.1648
FGFR1OP2	CYFIP2	ordinary	34.2628
FCHO1	PTPN13	ordinary	18.0747
INPPL1	TFRC	redundant	16.438
CD79B	BLNK	ordinary	13.3599
POLE	RMI2	ordinary	22.3321
MAPK3	CYFIP2	redundant	35.0519
HMGCR	MVK	critical	18.8058
CDC7	POLE4	redundant	17.4347
RBBP4	PLK1	redundant	24.0945
PRKACB	RAP1GAP2	ordinary	54.9466
KAT5	POLE2	redundant	19.781
POLD2	ATM	ordinary	13.6727
PIGW	SLC25A16	ordinary	25.9327
CALM1	VAMP2	redundant	21.249
SACM1L	PIK3C3	ordinary	19.6468
IFT122	PDE4D	ordinary	13.702
CCNB1	LMNB1	ordinary	67.3424
POLE4	RAD51	ordinary	23.7629
PSMD11	PPP2CA	ordinary	13.1077
DVL2	PLCH1	ordinary	17.5635
GCNT4	MUC6	ordinary	35.843
CCNB2	NUP210	ordinary	24.6156
ACOT2	BCKDHB	ordinary	26.2144
VPS37C	PPIA	ordinary	13.377
PSMD13	UBE2D1	redundant	20.4885
ASL	DARS	redundant	15.0494
CCNB1	RANBP2	ordinary	22.7207
GTF2H4	FANCI	redundant	22.8453
PSMA4	CCNE1	redundant	22.405
ERAP2	TAP1	ordinary	15.226
NCOA1	SLC27A1	ordinary	14.7524
RFC5	TOP3A	ordinary	21.719
ATP1B2	GNB1	ordinary	17.4895
CALM1	PLN	redundant	26.1153
PI4K2A	PIK3C2G	redundant	22.5569
SCN9A	SLC9A9	ordinary	15.8637
PIP5K1C	GNG11	ordinary	24.056
DLC1	RHOD	ordinary	19.16
SLC9A2	AKAP9	ordinary	14.1445
DENND4C	CHM	ordinary	15.4169
FXYD3	NCOA1	ordinary	12.7763
PRDM16	HIST1H3G	ordinary	20.6131
APP	TTN	ordinary	12.6074
DNA2	FANCF	ordinary	26.1061
SLC27A2	PHYH	redundant	18.5271
PSMD10	RBX1	redundant	19.227
NUP107	SUMO1	redundant	16.5234
PPIB	SERPINH1	redundant	20.3095
DNA2	RPA2	redundant	24.2178
STIM1	ATP2A2	ordinary	16.2607
POLE	WRN	ordinary	12.6798
AP2S1	ROR1	ordinary	26.9325
DGAT2	FITM2	ordinary	20.4244
PDGFRB	FGF7	ordinary	43.0672
GNB4	INPP5A	redundant	15.8716
PSMD11	LTB	ordinary	13.2897
STIM1	LMOD1	ordinary	20.792
BARD1	SUMO2	redundant	19.1364
ATP1B2	KCND1	ordinary	24.308
NIP7	WDR43	ordinary	42.8184
TAF1A	HIST1H3H	ordinary	12.7335
EHMT2	TAF1D	critical	12.8603
EXOSC5	UTP6	ordinary	20.3276
ARHGAP11A	RHOBTB2	ordinary	24.1041
LIG1	MNAT1	ordinary	18.2909
MAP3K11	ARAF	ordinary	12.8268
PSMD11	LTBR	ordinary	18.0977
RPS11	RPS9	ordinary	83.5429
ITPR1	PRKCB	redundant	38.2609
KL	AKT2	redundant	45.0783
PLCE1	CALM1	ordinary	12.7888
KL	CYFIP2	redundant	79.4909
RBBP8	POLE3	redundant	15.7257
SLC4A2	CFTR	redundant	45.6392
IL33	VAV2	redundant	20.2145
PRPS1	NAPRT	critical	13.8688
SRI	DMD	ordinary	21.8433
KAT2B	HIST1H2BG	redundant	25.3785
KL	FYN	redundant	48.7227
NUP37	BIRC5	redundant	62.002
NUP85	HSPA8	ordinary	13.5995
ITPR2	TPM2	ordinary	18.0701
PREX1	RHOJ	ordinary	40.0984
METAP2	DARS	ordinary	24.3005
TREM2	FCGR2A	ordinary	32.8575
ATP6V1B1	DTYMK	ordinary	16.7581
ASPH	VAMP2	redundant	17.9869
CENPJ	RAB8A	ordinary	15.5445
GSR	GSTM4	ordinary	18.9249
POLD3	EXO1	ordinary	26.4743
B3GNT3	OGN	ordinary	20.0259
CALM2	ACTG2	ordinary	14.285
POLH	RAD51AP1	ordinary	18.4033
HIST1H2BN	BARD1	ordinary	36.4324
NUP58	KPNA5	ordinary	15.5509
ARHGEF37	RHOBTB1	ordinary	39.0429
NCOA2	ATP1B3	ordinary	14.332
IL1RAP	FGFR1OP	ordinary	16.7324
PSMA7	ANAPC16	ordinary	29.9503
PTPN22	CD3E	ordinary	64.7099
PSMA1	APC	redundant	19.7582
SOAT1	SLC25A16	redundant	24.631
EXO1	UBA52	redundant	24.9706
DAB2	CD4	ordinary	45.0074
DENND2C	RAB9B	ordinary	20.5078
CACNA1C	PPFIA4	ordinary	12.6904
CACNB3	UNC13B	redundant	17.3072
PRMT1	HDAC1	ordinary	16.3787
MPHOSPH6	DDX49	ordinary	13.2492
CALM2	MYL9	redundant	15.6859
HMGCS2	PDHB	redundant	15.9159
NUP85	SNRPD2	ordinary	20.5572
ARPC3	FZD4	ordinary	26.6786
NUP210	BIRC5	redundant	32.4134
PSMD6	MAD2L1	ordinary	21.8272
ITPR3	PRKCD	redundant	16.4745
GUK1	ADCY1	ordinary	13.7006
PIK3R6	FGF7	redundant	22.8728
MCM8	PRIM1	ordinary	52.9619
CNOT7	EIF4A3	redundant	14.4935
NME1	GNAZ	redundant	35.9277
TRPM2	ANXA6	ordinary	13.5437
C1D	WDR43	ordinary	16.8433
PSMD11	OAZ3	ordinary	13.372
GTF2H3	POLR2D	redundant	19.8989
VRK2	TMPO	ordinary	19.1793
PSMD1	UBE2C	ordinary	33.8462
JAK1	STAT5B	redundant	19.2084
IDUA	SGSH	critical	14.5902
SRI	ACTA2	ordinary	15.3342
EPN1	AP2B1	ordinary	14.4817
FTSJ3	HEATR1	ordinary	15.4565
CAD	TPGS2	redundant	20.4021
SOCS3	IL6ST	ordinary	18.7626
PSMA6	FZR1	redundant	14.0244
SACM1L	PIK3R4	ordinary	16.7247
AP2M1	ARPC3	ordinary	12.9682
FCGR1A	BTK	ordinary	58.4039
PIK3CB	FNBP1L	ordinary	13.7332
PLCH1	ITPKA	ordinary	22.1591
SLC26A9	SLC6A14	ordinary	35.4164
APH1B	ITGB3BP	ordinary	12.9944
EXO1	EP300	redundant	21.804
ASL	SLC7A7	redundant	25.1551
GPLD1	NRN1	ordinary	31.235
ORAI2	NFATC2	redundant	19.0922
LIPT1	PDHA1	ordinary	16.1069
SLC7A11	GCLC	ordinary	33.0021
CACNB3	TPM4	ordinary	13.2033
SYNJ2	ARRB2	ordinary	18.5242
PLCG2	RASGRP2	redundant	29.1082
SLC44A2	CHKB	ordinary	16.9001
RACGAP1	RHOT1	ordinary	28.4094
WDR77	GEMIN6	ordinary	19.808
TRPM7	CACNB2	redundant	15.811
SLC1A5	IARS	redundant	15.8634
PIK3C2G	EPS15	redundant	25.2516
GNG7	AKT2	redundant	24.113
TRPV2	CACNA1C	redundant	13.6579
CDKN1A	MCM6	ordinary	24.5576
HDAC1	HIST3H2BB	redundant	16.0292
MYH7B	CALM3	ordinary	16.4721
ITPR2	TMOD1	ordinary	25.0728
ADCY4	PDE8A	ordinary	16.5528
GRIK5	SRI	ordinary	25.3768
RYR2	CACNA2D2	redundant	37.2699
TREM2	LCP2	ordinary	31.4069
BRIP1	POLR2C	ordinary	14.9704
RB1	NCAPG2	redundant	17.5723
GRB2	PIP5K1C	redundant	12.6641
PSMA7	AXIN1	ordinary	16.9618
NDUFA4	CYCS	ordinary	25.5227
P2RX1	DES	ordinary	15.132
MCM4	POLA2	ordinary	64.3888
GNG7	GNAS	redundant	23.8522
NCALD	SLC8B1	redundant	13.6418
PSMC3	CCNE1	redundant	15.0136
INTS7	POLR2A	ordinary	16.3808
CEP250	AJUBA	ordinary	15.2834
MAPKAPK3	PHC3	ordinary	24.8477
GNAZ	PDE1C	ordinary	63.6194
CCNB1	DYNLL2	ordinary	19.8321
CD3E	GRAP2	ordinary	66.468
ESPL1	ERCC6L	ordinary	29.9211
ATP1B2	CALM1	ordinary	19.3753
HOXA1	HIST2H2BE	redundant	14.0663
LAMTOR3	AIMP1	ordinary	23.0637
TIAM1	RHOD	ordinary	22.962
PSMD13	TNKS2	ordinary	13.2969
FXYD3	KCNK3	ordinary	14.0455
PPP2R1B	RBL2	ordinary	17.7335
GAB2	KL	redundant	56.575
POLD1	BRCA1	ordinary	49.3424
HIST1H3H	HIST1H4H	redundant	42.8817
NUP88	INCENP	ordinary	13.2068
RPS24	UTP14A	ordinary	15.1948
BRIP1	POLR2D	redundant	32.2897
PRMT5	HIST1H2AE	redundant	13.7945
CACNA2D2	MYL12B	ordinary	17.4359
KIF11	HLA-DRB1	ordinary	23.3917
ACTR2	VAMP7	ordinary	15.0032
PRKAB1	ATG13	ordinary	21.6616
PRKACB	RET	redundant	35.9827
KCNAB1	ATP1A3	ordinary	12.9668
TRPV2	CACNB2	redundant	14.1165
RUNX3	JAG1	ordinary	13.2223
SLC5A6	ATP1B3	redundant	14.6742
COLGALT1	COL11A1	redundant	27.4641
MCAT	PDHB	redundant	14.5142
MYD88	KL	redundant	47.6235
ATP1B1	HCN2	ordinary	17.2679
RMI2	RBBP8	redundant	21.0735
PIAS2	SUZ12	critical	13.1873
ALAS1	ACAT1	ordinary	43.8942
PPP2R5E	RAF1	ordinary	24.8861
PLCB4	CALM2	ordinary	14.1795
PSMC4	CDC23	ordinary	16.8931
DLG3	ATP2C2	ordinary	23.8804
HIP1R	SLC2A8	ordinary	16.0856
DNMT3B	HIST1H2BD	ordinary	18.5405
ICOS	NCKAP1L	ordinary	60.3837
CRTAP	COL8A1	ordinary	18.7232
TREM2	GAB2	ordinary	20.2652
PSMC3	TNKS2	ordinary	17.5456
GNGT1	ATP1B3	redundant	28.2482
CCNB2	NUP85	ordinary	31.2864
COPS7A	KEAP1	ordinary	18.1029
DVL3	GNG5	ordinary	17.3484
TPCN1	TLN1	redundant	16.7972
BLM	POLB	redundant	26.579
KDM6B	H2AFX	ordinary	17.1603
KCNMA1	ATP1B3	ordinary	26.9973
RNF4	BRCA1	ordinary	19.9023
NSMCE4A	SMC1A	ordinary	14.2865
CD80	AKT3	ordinary	14.1507
CCNB2	CKAP5	ordinary	45.5613
ARHGEF18	RHOU	ordinary	20.9272
CALM3	ACTG2	ordinary	12.5925
AK9	ATP6V1C2	ordinary	16.9635
PRKAB1	PIK3C3	ordinary	20.4713
NUP37	CPSF2	ordinary	17.8547
MCM8	POLE3	ordinary	23.3203
PCF11	RPAP2	ordinary	13.9306
RUVBL1	COPS2	ordinary	17.8392
ELOVL7	SLC25A16	ordinary	23.3196
CERS4	ACSS2	redundant	13.7924
LIG1	CDK7	ordinary	14.371
KALRN	RHOV	ordinary	22.5835
MYD88	MYO18A	redundant	23.2956
PIK3C2G	ARPC2	redundant	20.2361
SKIV2L2	UTP20	ordinary	14.8144
PSMA2	TRAF2	redundant	12.9842
ATP2B1	CALD1	ordinary	12.7704
NCL	KRR1	ordinary	21.3308
PIP5K1B	DVL2	redundant	25.893
CNGA1	TPM2	ordinary	20.0145
ADCY9	PDE1A	ordinary	24.646
CCNH	CDK1	redundant	26.2023
OPLAH	NICN1	ordinary	24.6998
PIK3R2	PACSIN2	redundant	12.8923
FANCD2	CHEK1	ordinary	30.5363
TPCN2	LMOD1	ordinary	16.1099
PSMD6	BUB1B	ordinary	20.7696
PIP4K2A	AXL	ordinary	32.6156
PRMT5	GEMIN2	ordinary	29.6339
NPM1	MYBL2	redundant	25.1123
SLC4A4	SLC8A1	ordinary	17.09
PSMA1	CDK1	redundant	43.5396
MTA3	TAF1B	critical	24.2266
XPO1	CDK1	ordinary	58.2632
PSMB4	PPP2R5E	ordinary	19.1677
RAE1	CPSF2	ordinary	15.0036
RABGGTA	RAB9B	redundant	23.6372
NUP153	SNRPB	ordinary	17.5398
RTF1	HIST1H2BH	ordinary	16.9748
XYLT1	GPC1	ordinary	12.6026
PIK3CD	CD3G	redundant	17.9471
KAT5	FANCB	ordinary	18.9574
GRAP2	RASGRP4	ordinary	17.6553
LRRFIP1	KL	ordinary	45.0776
ERCC2	BRCA1	ordinary	21.7241
ADCY4	PDE1A	ordinary	47.4847
CDC7	MCM2	ordinary	42.3197
RUNX1	LIFR	ordinary	74.2672
TAF1B	HIST1H3H	ordinary	14.6244
CCNB1	RAB1A	ordinary	20.14
CACFD1	VDAC3	ordinary	13.9175
COPS5	FEM1C	ordinary	12.986
RRM2	TXN	redundant	18.8453
PSMA2	BUB1B	ordinary	24.0881
STAM2	VAMP7	ordinary	21.7848
TRAF6	CD80	ordinary	12.9113
HIST1H2BD	BRCA1	ordinary	20.2485
DNA2	POLR2H	redundant	23.496
LIN54	CCNB1	ordinary	21.8043
INPP5D	DVL2	redundant	16.9258
AP2A2	FZD4	ordinary	26.5329
TRAK1	MAPK3	ordinary	16.4272
ATP6V1E1	ARL2BP	critical	14.3075
ARHGAP6	RAC1	ordinary	16.6847
CDK1	CENPQ	ordinary	39.0384
DLG1	ATP2A2	ordinary	18.5821
PLCB4	PRKCE	ordinary	16.1272
PIP5K1C	GAB1	redundant	16.3986
DTYMK	ADCY4	ordinary	19.7949
DVL2	HLA-E	ordinary	15.0924
MOB1A	WWTR1	ordinary	12.8867
RPA3	BRCA1	redundant	40.6917
RPS27A	RFC3	ordinary	24.239
LCK	LCP2	redundant	15.9044
ATM	POLD1	redundant	17.5239
LAMA1	HGF	ordinary	19.8093
PSMC1	UBE2C	ordinary	28.4836
NDC1	SNRPF	ordinary	22.5696
CBFB	LGALS3	ordinary	20.0261
ACSL3	PPARD	ordinary	20.7136
PSMA1	CDC27	ordinary	13.5666
ARFGAP1	AP2S1	ordinary	13.9186
CLCN5	ANO5	ordinary	17.4529
WDR77	SNRPD2	ordinary	13.9584
FGFR1OP2	WASF3	ordinary	14.7926
PRKAB1	LAMTOR1	ordinary	19.9655
CACNB2	CACNA2D3	ordinary	14.7362
USP18	DDX58	redundant	48.9647
GNAI1	PDE4C	ordinary	15.4684
RPA1	FANCI	redundant	35.8554
ARHGAP39	RHOBTB2	ordinary	13.877
NUP153	ALYREF	ordinary	18.6901
GNG7	PRKCA	redundant	24.7287
DLG3	CALM2	redundant	19.0499
AK9	IFT140	ordinary	25.1006
PSMF1	THOP1	redundant	14.2133
CACNA2D3	RAB3A	ordinary	17.3384
NUP155	SNRPD2	ordinary	18.4243
LOXL4	PXDN	ordinary	17.034
DVL3	BCR	redundant	13.0995
ATP6AP1	SLC25A4	ordinary	56.7272
ATP6V1E2	DTYMK	ordinary	15.8786
GEN1	KAT5	ordinary	16.1864
DVL2	EPN1	redundant	18.6383
ANO5	SLC26A6	ordinary	22.5775
GNG7	ATP1A3	redundant	26.255
MYBBP1A	H2AFZ	ordinary	19.6981
GABPB1	TFAM	critical	15.7866
ATP1A1	KCNK3	ordinary	14.3684
EPS15	ACTR2	ordinary	23.2563
PSMD11	CDC26	ordinary	20.3456
CCNB1	NUP133	ordinary	26.5789
UBC	BLM	redundant	26.3129
TLN1	PTK2	ordinary	15.3293
CCNB2	NUP54	ordinary	22.6374
COPS7A	FBXL13	ordinary	24.9379
PLK4	RAB8A	ordinary	21.7297
SUPT4H1	CHEK1	redundant	20.5968
SH2D2A	WASF3	ordinary	23.9978
ORAI1	PLN	redundant	18.5375
CHMP4C	GABARAPL1	ordinary	25.0132
USP4	TRAF2	redundant	15.3445
CDK1	FOXM1	redundant	56.1373
CHST6	OGN	ordinary	18.9625
CERS3	ATAT1	ordinary	15.6535
EXOSC2	DHX37	ordinary	22.2019
DGAT2	ACSS2	redundant	14.3342
UBE2E1	CXCL8	ordinary	17.5427
FAM13A	RHOA	ordinary	24.5594
COLGALT1	COL24A1	ordinary	24.6045
RMI2	POLI	ordinary	17.6987
RAD51C	BRCA2	ordinary	29.2857
CACNA1C	ATP2B4	ordinary	34.1583
ATP1B2	SLC24A1	ordinary	19.2106
PIP5K1B	ARPC5	redundant	13.5162
ATP6V0A2	AK7	ordinary	16.0853
HIST2H2BE	HIST1H3D	ordinary	44.7699
PSMB5	TNFRSF12A	ordinary	12.7284
MCOLN3	CACNB2	redundant	19.623
CDK1	KNTC1	ordinary	60.2651
AK3	MCCC2	redundant	28.2958
FAM13B	RHOQ	ordinary	15.2889
CCNB1	MAD1L1	ordinary	28.6919
PSMD12	UBE2C	ordinary	33.9624
INPP5J	UBC	redundant	17.6527
LCK	KL	redundant	49.6665
PIP5K1C	ACTR2	redundant	17.4631
CACNA2D2	DLG1	ordinary	16.8995
PRKAB1	TSC1	ordinary	36.8131
ATP1B2	SLC6A20	ordinary	15.6396
SLC6A9	ATP1B2	redundant	15.6705
GFPT1	SLC25A13	ordinary	14.0785
ATM	PRKDC	redundant	16.6448
TOMM5	TIMM22	ordinary	13.2737
PTPRC	HLA-DRB1	ordinary	38.1681
SLC9A2	SLC9A8	ordinary	17.4493
NCOA1	G0S2	redundant	22.6767
PIP4K2A	SGIP1	ordinary	16.0704
VAMP2	TRPC6	redundant	21.4161
PPAT	TTLL11	ordinary	14.1265
CSF2RA	STAT5B	ordinary	15.8767
RPS27	RPS2	ordinary	24.6877
PRKAG2	DYNLL1	redundant	18.3127
PRKACB	KCNJ11	redundant	52.0528
PSMA3	TNFSF11	ordinary	18.8795
RBBP8	RPA1	redundant	17.1683
ACTL6A	HIST1H2AE	redundant	32.1737
INPP5J	VAMP4	redundant	20.0319
CALM3	SLC4A4	redundant	15.45
POLR2J	EPAS1	ordinary	12.8792
PDE3B	GMPR	ordinary	25.3114
MAT2A	MECOM	ordinary	22.93
C1QB	C1R	ordinary	38.3011
PSMD14	TAP2	redundant	18.4379
EPS15L1	ARPC1B	ordinary	16.3814
PSMA6	CKS1B	ordinary	34.9845
CLCN2	SLC6A11	ordinary	13.2048
FANCG	FANCD2	ordinary	21.1663
PIP5K1B	SNX18	ordinary	20.3268
MAPK11	CBX2	ordinary	12.923
PSMA5	CKS1B	ordinary	36.6304
FGF2	PLCG2	ordinary	13.5537
ABCC9	SLC12A2	ordinary	25.0282
PSMB6	BUB3	ordinary	17.6384
TRPC1	LMOD1	ordinary	41.3016
SLC38A2	ATP1B1	redundant	16.0263
AGBL3	SLC3A2	ordinary	13.9656
SLC25A26	HSD17B10	ordinary	14.197
DCP1B	LSM6	critical	12.9848
CACNB2	PRKCD	redundant	19.1781
ITSN1	VAMP2	ordinary	21.7386
CACNA1C	MYH11	redundant	87.3838
SLC8A1	CACNB2	redundant	37.1374
RUVBL2	HIST1H4I	ordinary	14.9729
CLCN5	ARHGEF9	redundant	14.5627
TRPM6	MYL9	redundant	14.1202
EPS15	VAMP3	ordinary	12.6182
SLC4A4	SLC1A1	redundant	26.8342
PSMB10	TRAF2	redundant	20.3469
CLNS1A	SNRPD1	ordinary	20.4381
ACTB	HIST1H2AE	ordinary	13.4532
BOP1	NOP56	ordinary	34.8775
CNOT1	EIF4A3	ordinary	14.9747
MMP9	COL15A1	ordinary	14.6077
SPTBN1	ARCN1	ordinary	21.7972
CACNA2D4	TPM2	ordinary	15.0933
FYN	VAV1	redundant	25.823
SREBF1	SQLE	ordinary	12.7345
SRC	AGTRAP	redundant	14.5419
GNG7	CD247	redundant	35.6992
PIK3C2B	TGOLN2	redundant	32.7713
SLC1A1	VAMP2	ordinary	25.1731
THEM5	HADHB	ordinary	16.6278
LPGAT1	MORC2	ordinary	14.3442
TOP3A	RFC1	ordinary	16.5645
PSMD3	ANAPC11	ordinary	17.4874
P4HA1	COL5A1	ordinary	19.1791
P2RX7	CALD1	ordinary	24.1645
FAM20C	LGALS1	ordinary	28.5124
FKBP1B	CACNB2	redundant	16.6452
TPCN2	TMOD1	ordinary	22.5812
CD247	CD80	ordinary	35.5879
B4GALT6	OGN	ordinary	18.1967
SYNJ2	SH3KBP1	redundant	22.1468
RGS5	GNAI3	ordinary	14.0791
MB21D1	TMEM173	ordinary	12.8622
SPTLC1	ACSL3	ordinary	17.9047
TULP3	PDE1C	ordinary	26.5776
RDH16	RDH12	ordinary	15.6416
CDKN1A	ORC6	ordinary	27.7514
TOP3A	RPA1	redundant	26.4657
EXOSC2	DCAF13	ordinary	27.5886
PPM1A	PRKAB2	ordinary	29.1553
CALM3	CACFD1	ordinary	32.5668
BTC	WASF3	ordinary	20.1769
GNG2	PRKCB	ordinary	27.3958
PSMD13	GTSE1	ordinary	26.6721
GRIN2D	DMD	ordinary	21.169
BRIP1	NEIL2	ordinary	13.3424
PSMD3	RELB	ordinary	14.2666
KIF11	HLA-DQA1	ordinary	22.0689
ATP1B1	KCNK1	ordinary	23.6332
ARHGEF9	SLC4A2	ordinary	32.6687
TRPM7	MYH11	redundant	14.2475
PRMT6	HIST1H4I	ordinary	12.8559
TGS1	SNRPB	ordinary	22.4703
CDK1	LMNA	ordinary	24.7793
ACOX2	CAT	ordinary	21.3748
CDK2	CDT1	ordinary	51.2294
NUP205	HSPA4	ordinary	13.2771
FZD5	PARD6A	ordinary	15.6008
GGT1	ARL6IP5	redundant	14.2223
PIK3CD	CD3D	redundant	17.9821
HIP1R	VAMP4	ordinary	18.6245
DVL1	EPN1	redundant	14.7695
PSMA1	TNFSF11	ordinary	16.2412
PSMB1	GTSE1	ordinary	24.8761
SLC6A8	ATP1B3	ordinary	17.6778
RFC4	XRCC3	ordinary	26.3775
SENP8	NEDD8	ordinary	18.7307
FCGR3A	RAC1	ordinary	14.8117
H2AFX	HERC2	redundant	13.2419
ITPR1	CNGA1	ordinary	26.3043
PSME4	CDK1	redundant	28.0759
CACFD1	MYH11	redundant	24.341
GNAO1	PRKCB	redundant	24.6684
TRPM2	CPNE3	ordinary	12.7428
EXOSC9	KRR1	ordinary	15.8935
GAB1	MYO18A	ordinary	15.547
PIP5K1C	TREM2	ordinary	19.6369
WRN	POLE2	redundant	18.037
PDE2A	PPAT	ordinary	31.9181
SLC25A4	ATP6V1G1	ordinary	55.535
SLC3A2	SLC9A8	redundant	20.0801
ARL2BP	ADCY6	ordinary	22.6578
POLD1	RMI2	ordinary	40.2488
ARAF	TRAK1	ordinary	25.9207
CD4	PRKCQ	ordinary	25.7232
ADCY2	PDE1C	ordinary	78.3479
PDGFRA	SOS1	ordinary	14.1376
PIP4K2A	ARRB2	ordinary	12.8087
TWISTNB	HIST1H4I	ordinary	17.1991
CALM3	PRKCA	redundant	22.0126
GNAL	PDE4D	ordinary	35.1211
KCNAB1	ATP1B2	ordinary	32.74
E2F5	CDK1	ordinary	28.3227
CDK2	PRIM2	redundant	74.9851
ARHGEF9	SLC6A11	ordinary	17.953
TPCN2	TLN1	redundant	15.6188
BRIP1	TP53	redundant	19.1735
MSRB3	AIMP1	ordinary	16.3774
INPP5J	DAB2	redundant	18.0919
SH3KBP1	ITPR1	redundant	24.8944
NFIC	POLR3B	ordinary	20.8759
GATAD2A	HIST1H2BG	redundant	13.2281
FGFR4	KL	ordinary	49.4679
DHX9	NFKB2	ordinary	12.604
POLE3	EXO1	ordinary	42.4566
AAK1	VAMP7	ordinary	15.2534
PSMB2	ANAPC16	ordinary	27.1617
CDK2	MCM3	ordinary	39.5678
CACNA2D2	ANXA6	ordinary	24.2826
PSMD12	BUB3	ordinary	18.8433
PRKCA	SPHK1	ordinary	13.3726
COPS5	WDTC1	ordinary	15.0699
CACNB2	LMOD1	ordinary	49.3125
SYNJ1	PIK3R1	ordinary	23.7163
SPTSSB	SLC25A16	ordinary	18.4454
[truncated: 22,521 more rows]

## Sheet: HNSC
node1	node2	edge_type	activity
NUP98	CDCA8	ordinary	90.5771
SOCS1	LY96	redundant	45.7861
SOCS1	TLR2	ordinary	44.9573
PAF1	HIST1H2BC	ordinary	12.9615
EGFR	FGFR3	redundant	15.5905
NFYA	DDIT3	ordinary	34.0194
CACNA2D1	ATP2A3	ordinary	85.1368
PIK3CA	CD3D	redundant	23.9998
TRPM6	PRKCD	redundant	34.6745
SH2D2A	CYFIP2	redundant	53.2877
AHCYL1	TNNC2	ordinary	117.821
PLAT	PDGFD	critical	35.0082
PIP4K2C	ERLIN2	redundant	16.7823
ATP6V1E1	ADPGK	ordinary	40.6091
NOL12	HEATR1	ordinary	25.8655
PIK3R6	BIN1	ordinary	58.8968
DLG1	CAMK2A	redundant	75.2711
ACVR2B	BMPR1A	ordinary	97.5432
GNG7	PRKCQ	ordinary	128.799
UIMC1	HIST1H2AG	ordinary	48.8925
RYR3	SLC8B1	redundant	30.8798
CCNB2	SEC13	ordinary	78.0639
KDR	RAC1	redundant	17.243
STAT4	LCP1	ordinary	23.3078
PSMB7	PPP2R5C	redundant	23.6187
FCGR1A	FGFR1OP	ordinary	14.9102
RIOK3	RPS4X	ordinary	23.0026
PIP5K1A	WASL	ordinary	39.2513
CALM3	TNNT1	ordinary	93.3302
CHMP4A	UBA52	ordinary	98.519
AGO4	CDKN2A	ordinary	37.0894
GFRA1	KRAS	ordinary	48.9984
GNG11	INPP5K	ordinary	27.6888
GGT7	CAMK2B	redundant	72.9565
ELL	RPS27A	redundant	18.2928
MAPK3	NCKAP1	redundant	48.2998
MYD88	LAT2	ordinary	30.1728
PIP5K1C	GNAI3	redundant	17.1355
ITPR3	TNNI2	ordinary	105.753
SEC23A	SEC22B	ordinary	25.1844
COPS4	WDR5	ordinary	46.638
EYA4	RAD50	ordinary	21.3295
PSMA4	CDC16	ordinary	20.2225
ADCY7	AKAP5	ordinary	21.624
POM121C	SNRPF	ordinary	22.333
GNAI1	CACNA2D1	ordinary	41.1542
ANK3	KDELR3	ordinary	40.4849
PLCE1	DAGLB	ordinary	35.5519
MTMR14	PLBD1	ordinary	17.323
GTF2H5	POLR2B	ordinary	12.9953
ARRB1	MAPK3	ordinary	70.0602
DZIP1	GLI3	redundant	41.8835
SLC25A4	GNAI1	redundant	246.811
ITPR1	CAMK2A	redundant	118.428
VCL	MAPK1	ordinary	34.5301
IVD	MCCC1	ordinary	74.0101
RPL38	UPF1	ordinary	14.5857
TFAP2A	PITX2	redundant	23.9759
MBOAT1	PLA2G4E	ordinary	15.1014
RFC5	XRCC2	ordinary	199.737
SLC25A13	QARS	redundant	74.9743
KIF2C	HLA-DRB1	ordinary	86.6719
EXOSC6	DIEXF	ordinary	16.0076
SRI	TRIM72	ordinary	31.294
SIRT1	TAF1B	ordinary	28.8078
SEC11A	RPL36AL	ordinary	20.7347
NIP7	UTP15	ordinary	19.789
JUN	KDM6B	ordinary	14.1552
DNA2	RFC1	ordinary	108.055
PIK3CD	BAIAP2	redundant	41.2675
CAMK2A	CPNE7	ordinary	95.7768
FBXO11	CUL1	ordinary	28.9017
BRD8	HIST1H4I	ordinary	37.2273
PIK3R2	TGOLN2	redundant	32.4519
ARHGEF40	RHOBTB2	ordinary	37.248
P3H2	COL28A1	ordinary	37.6595
ATM	RBX1	redundant	30.4695
PSMD8	ANAPC16	ordinary	37.9211
HLA-DQB1	ZAP70	ordinary	59.9483
ATP6V0C	ARL2BP	ordinary	27.856
CACNA2D1	TNNT3	ordinary	90.7224
CAMK2G	CPNE7	ordinary	45.7891
PIK3CB	CD80	redundant	40.6329
EXO1	POLR2E	ordinary	84.3015
HK2	SLC37A1	ordinary	62.1323
CAPZB	HSP90AA1	ordinary	16.847
CNIH2	SEC24C	ordinary	31.3385
HIST1H2BC	CHEK2	ordinary	38.571
SUPT16H	CHEK1	ordinary	114.649
PTEN	FGF7	redundant	47.3276
EXO1	POLR2L	ordinary	76.7339
SLC35A1	ST8SIA2	ordinary	16.0402
ARHGAP6	RHOBTB2	ordinary	76.3696
POLR2H	FANCI	ordinary	95.822
SMYD3	HIST1H4H	ordinary	40.525
AGPAT4	SLC27A2	ordinary	43.0841
BIRC2	LY96	redundant	22.6994
NCOA2	AKAP9	redundant	53.3197
P2RX4	CAMK2G	redundant	21.5778
USP21	TAB1	ordinary	67.3289
IRAK1	CYFIP2	redundant	20.0626
GPS1	SOCS3	ordinary	35.9928
SLC25A16	BCKDHB	ordinary	86.964
SUCLA2	CPT2	ordinary	69.8649
FKBP1B	TNNT1	ordinary	86.2421
TSC1	RRAGD	ordinary	131.571
CCNB2	CENPU	ordinary	153.427
PIP5K1A	RAP1B	redundant	25.9054
EXO1	FANCE	ordinary	132.517
BRCA1	SYCP2	ordinary	123.046
EIF5	EIF4G1	redundant	20.2688
NRG1	INPP5J	ordinary	54.6612
CHD4	HIST1H2AC	ordinary	19.1132
AGFG1	ACTR3	ordinary	30.6929
ADCY9	RAPGEF3	ordinary	12.7546
PEMT	PTDSS1	ordinary	45.3789
RYR1	CALD1	ordinary	114.77
CACNA2D3	NFATC1	redundant	26.3748
RORA	NPAS2	redundant	68.5162
GNPDA1	MPI	ordinary	60.9125
FURIN	PDGFA	ordinary	26.0547
CACNA2D1	TNNI1	ordinary	85.2639
ARHGEF19	RHOH	ordinary	13.4186
AGBL5	RARS	redundant	14.0697
DAPP1	CALM2	ordinary	19.2507
PIK3CA	FGF2	redundant	20.9385
FAM13A	RHOQ	ordinary	80.7664
PSME2	SKP2	ordinary	45.8456
GNG2	ITPKC	ordinary	32.6452
ROCK1	MYH9	ordinary	49.9693
MAN2B2	MANBA	critical	47.7104
MCAT	HADHA	ordinary	31.895
STX1A	NEFL	redundant	67.4241
ARHGEF4	RHOQ	ordinary	28.1112
INPP5J	AP2A1	ordinary	31.1839
GPSM3	ACKR3	ordinary	13.6016
PIK3R5	AP2A1	ordinary	14.1782
SLC10A6	CAMK2B	ordinary	75.3713
PRKAG2	LAMTOR5	ordinary	20.5894
TP53	NDRG1	ordinary	21.7389
TCIRG1	DTYMK	ordinary	83.5987
TAGAP	RHOC	ordinary	23.0513
TNFSF13B	MAP3K14	ordinary	47.7612
CTTN	VAMP2	ordinary	27.8502
AGPAT3	LPIN1	redundant	171.894
RUNX3	TEAD1	ordinary	41.878
DDX58	CASP8	ordinary	56.6594
ST8SIA2	SLC35A1	redundant	16.0402
PSMD6	CKS1B	ordinary	80.2191
RPS15A	WDR36	ordinary	19.2452
SLC35A3	MGAT4B	ordinary	17.2488
CEP152	AURKA	ordinary	122.697
IRAK3	TOLLIP	ordinary	20.2215
PRKAA1	RB1CC1	ordinary	39.8114
CDK1	H2AFZ	redundant	223.395
UBE2V1	PRKCQ	redundant	26.2971
CDK6	TFDP1	ordinary	30.0299
SLC52A2	RFK	ordinary	59.5355
DUSP7	MAPK7	ordinary	15.3703
ATP1A2	GNB2	ordinary	95.7445
NUP160	SNUPN	ordinary	16.8964
PIP4K2B	GNA15	redundant	36.0195
B3GLCT	THSD7A	ordinary	15.4998
MAPK7	MEF2A	ordinary	15.2014
SYNJ2	M6PR	redundant	48.2675
MAT2B	SLC25A26	redundant	17.982
ATF2	HIST1H4H	redundant	20.5661
EYA2	HIST1H2BC	ordinary	44.0086
PDPN	PRKCQ	ordinary	73.0174
UBC	PIP5K1A	redundant	20.8516
USP21	TRAF2	redundant	28.2653
CD36	IRAK2	ordinary	16.2561
FTSJ3	DDX49	ordinary	46.0634
CAMK2G	AKAP1	redundant	92.7954
AK9	ATP6V0E2	ordinary	88.5383
PSMB6	UBB	redundant	65.3953
UBA52	RFC1	ordinary	18.6442
DDX21	H2AFX	redundant	20.3874
CCNA1	MCM6	ordinary	47.3706
NFIA	POLR3K	ordinary	71.3754
LIG1	AQR	ordinary	33.9974
DVL2	AXL	redundant	22.9943
PIK3CD	NCKAP1	redundant	32.683
FCGR2A	PLCG1	ordinary	57.0324
PSMC3	CDC27	ordinary	24.4954
ORMDL2	MORC2	ordinary	74.9108
PLCE1	PRKCD	ordinary	41.1673
RBL2	CDC25C	ordinary	56.1006
CAMK2A	PPP3R1	ordinary	78.4351
PSMC2	CDC20	ordinary	74.1599
CDK1	CDC26	ordinary	76.4864
PSMA6	MAD2L1	ordinary	76.545
PIK3CG	CLTCL1	ordinary	35.7557
PSMA4	OAZ2	ordinary	52.6001
PSMD7	AJUBA	redundant	29.8617
PSMA5	BIRC3	redundant	13.5667
ZMYM2	ABI2	ordinary	84.9462
USP1	MUS81	ordinary	41.1509
STAT3	JUNB	redundant	24.6479
GRB2	SYT11	redundant	23.5091
PSMA2	NPEPPS	ordinary	54.341
CACNA2D4	CPLX1	ordinary	15.6742
PSMD9	UBE2E1	ordinary	23.4044
TRAPPC4	CHML	ordinary	25.0483
KAT5	RFC4	ordinary	68.3141
PSMB6	SMURF2	ordinary	35.6114
ICOS	CUX1	ordinary	23.8067
PIK3CD	VAMP3	redundant	49.7875
COPS2	COMMD8	ordinary	19.6535
SLC4A7	CAMK2G	redundant	18.1831
SMAD4	SMAD7	redundant	38.6505
SRC	CD247	redundant	20.3961
ITSN2	ADRB2	ordinary	28.5925
PIK3CB	FGFR2	redundant	28.9973
PSMA6	OAZ3	ordinary	31.7489
AKT1	GUCY1A3	ordinary	25.9164
MCOLN3	VDAC3	ordinary	30.6202
ATP2B1	PPP3R1	ordinary	34.4316
XRN2	RPS15A	ordinary	17.4517
CBL	IGF2R	redundant	110.282
EIF5	RPS6	redundant	13.8696
FGFR1OP	STAT3	ordinary	18.0459
PSMC4	SKP1	ordinary	35.1607
PSMB2	PRICKLE1	redundant	48.5767
POU2F2	POLR2A	ordinary	17.9511
RNLS	PXDN	ordinary	36.1295
CNGA1	AKAP9	redundant	40.4334
HBEGF	BRK1	redundant	32.0093
GNG4	INPP5J	ordinary	36.4382
TRPV2	ATP2A2	ordinary	63.5686
EP300	HIST1H2AG	redundant	42.1808
ARHGAP33	RHOT2	ordinary	49.484
SLC25A13	MARS	redundant	17.3882
NEFL	TNNT2	ordinary	19.8949
PCOLCE	COL24A1	ordinary	135.127
SUOX	PRDX3	ordinary	90.6094
ATP1B3	KCNN4	ordinary	39.7245
TPCN1	TCAP	ordinary	168.004
AKAP1	TNNT2	ordinary	34.0005
EXOSC9	WDR46	ordinary	33.4108
PDGFRB	INPP5D	ordinary	23.7876
PSMC5	PPP2R1B	redundant	15.3173
RFC2	RAD51AP1	ordinary	108.801
P3H3	COL5A3	ordinary	73.3178
FAM20C	FSTL3	ordinary	39.3765
MED1	TXNRD1	ordinary	20.0611
DLG1	VDAC1	redundant	16.3125
NIPAL2	MMGT1	ordinary	22.5801
DNA2	FANCI	redundant	252.637
PLA2G4E	PLA2G4D	redundant	133.217
TAF1B	HIST1H2BJ	ordinary	25.3253
GNB4	ZMYM2	ordinary	20.8611
IL33	WASF3	ordinary	30.9423
MAPK1	FGFR2	redundant	21.4753
RBBP4	BRD1	ordinary	25.7348
TAF1A	HIST1H2BG	ordinary	46.0288
PIP4K2C	PIK3R3	ordinary	13.8922
ORAI1	SORBS1	ordinary	139.084
CCDC8	BIRC5	ordinary	66.7731
RMI1	APEX1	ordinary	30.2321
PSMC5	NPEPPS	ordinary	42.2248
RAE1	AURKB	ordinary	135.655
GPSM3	CXCL8	redundant	16.3943
TPCN2	MYL6B	ordinary	57.1266
PIP5K1B	EGFR	redundant	36.3128
AKT2	BRPF1	redundant	38.9913
PIK3R3	AKT2	redundant	20.1874
COPS8	SKP2	ordinary	33.7227
NUP85	HSPA4L	ordinary	40.9406
PSMD12	TNFSF12	ordinary	27.2164
ERBB3	NCKAP1	ordinary	44.3189
NME1	TTC21B	ordinary	19.7283
ANK2	TMED9	ordinary	104.385
TRPM6	ATP2A1	ordinary	183.661
GNAI1	TRPM6	ordinary	26.7863
HIST1H2BD	H2AFX	ordinary	42.4852
LEF1	HIST1H2BG	ordinary	15.5376
PIK3C2B	ACTR3	redundant	43.7183
NUP214	PHAX	ordinary	30.8377
DVL1	EPHB6	ordinary	31.8711
LPGAT1	ACSS2	redundant	54.9363
NUP188	CPSF4	ordinary	17.1486
RBBP8	HMGN1	ordinary	29.5737
FOLH1	GCLM	ordinary	28.983
GLE1	TPR	ordinary	53.4429
NFYA	PMVK	redundant	42.6233
DVL1	PIK3R2	ordinary	15.058
TAF6L	HIST1H3H	ordinary	45.8341
PIP4K2A	TF	redundant	78.8675
PPP5C	NRAS	redundant	17.8035
ORAI2	TMOD1	ordinary	79.9507
POLK	RAD50	ordinary	95.4325
SLC25A16	CPT2	ordinary	77.2727
RBBP8	CCNH	ordinary	36.4893
DCTN5	HSP90AA1	ordinary	19.2058
SYDE2	RAC3	ordinary	37.8529
VAMP7	SH3D19	ordinary	16.5881
ITSN1	ARPC1B	ordinary	48.4752
SLC38A9	RPS6KB1	ordinary	24.2589
PTGS2	PTGIS	redundant	38.5152
ANO1	SLC6A6	ordinary	25.3128
ASB7	NEDD8	ordinary	41.9853
CALM1	PYGL	redundant	45.0467
CEACAM1	FN1	ordinary	129.997
FKBP1B	VAMP2	redundant	17.5235
PSMB6	CDK2	redundant	44.7906
HAUS5	AURKA	ordinary	111.287
MMP9	CDH1	redundant	61.2092
SEC24C	SERPINA1	ordinary	20.7484
FGFR3	BRK1	ordinary	24.3035
FAM13B	RHOBTB2	ordinary	27.2616
MGLL	AQP9	ordinary	105.523
PIP5K1C	PIK3CD	redundant	34.4063
CD3D	ARPC5	ordinary	20.9989
BRD1	HIST1H3D	ordinary	12.8558
DEK	HIST1H4I	ordinary	81.3907
RPS15A	EMG1	ordinary	16.2408
CA13	ATP6V1D	ordinary	67.0768
CACNA2D1	MYL6B	ordinary	69.3851
OSBPL10	SACM1L	ordinary	53.194
IL1RAP	FCGR1A	ordinary	19.434
MET	BCR	ordinary	31.0785
AGTPBP1	BCAT1	ordinary	23.765
DHCR24	CYP7B1	ordinary	26.7617
CAMK2G	SORBS1	ordinary	154.569
PIK3R1	CD3G	redundant	72.1536
ATP1B1	CNGA1	ordinary	39.7354
ACTR8	RAD23B	ordinary	22.838
HGS	EGFR	redundant	27.921
ST3GAL4	MUC15	ordinary	101.336
ACTR1B	ACTR1A	redundant	24.5279
PLA2G4D	AGPAT4	ordinary	15.1396
TRPV4	DYSF	ordinary	17.3796
TNRC6C	NOTCH4	ordinary	37.2523
GNB1	ATP1A1	ordinary	26.4489
TRPV4	TNNC1	ordinary	63.1833
PTPN6	HLA-DRB1	redundant	72.6823
TAF10	HIST1H2BH	ordinary	27.5682
IFT140	AKAP5	ordinary	21.1664
SMDT1	SLC8B1	ordinary	55.6551
TBL1XR1	FADS1	redundant	70.6346
GNG2	DGKI	ordinary	22.0024
PLD2	PLA2G2A	redundant	32.4166
CCNB2	TPR	ordinary	69.2369
PSMB2	TNFSF14	ordinary	40.1666
ARHGAP10	CDC42	ordinary	49.7503
PDGFRB	BRK1	ordinary	43.1069
SEH1L	HSPA9	ordinary	26.1141
RPS27A	FANCM	redundant	18.6714
CALM3	TRPC1	redundant	12.9452
ITPR1	TMOD2	ordinary	71.5823
SPTSSA	ACLY	ordinary	34.0094
GNG11	NCKAP1	ordinary	23.0766
IFT122	GLI1	redundant	26.1174
MAT2B	GAMT	ordinary	65.7514
NUP85	FIP1L1	ordinary	60.8375
FAM20C	IGFBP7	redundant	35.691
ATP12A	ARL6IP5	redundant	67.5523
PREX1	RAC2	ordinary	96.5732
NUP85	KPNA5	ordinary	68.87
CACFD1	DES	ordinary	30.9591
SMAD2	SMAD7	redundant	27.3538
ATP6V1H	ABCC4	ordinary	22.7215
ABCA5	ABCA6	ordinary	50.9616
TRPC4AP	STXBP1	ordinary	14.8724
ACTN2	ACTG2	ordinary	80.7209
AP2A1	VAMP4	ordinary	15.8161
COMMD2	UBE2F	ordinary	31.4764
PSMD10	CCNE2	redundant	47.7773
PSMA6	RBX1	redundant	20.865
SPCS1	RPS5	ordinary	51.9667
TOP3A	PRPF19	ordinary	42.4309
NUP43	CPSF3	ordinary	70.1785
PIK3R5	TFRC	redundant	27.2116
CACNB1	RAB3A	redundant	63.5253
DHRS9	RDH12	ordinary	44.4421
CRLS1	BCKDHB	redundant	61.4016
PFAS	TTLL4	ordinary	53.7527
PDGFA	LCP2	redundant	30.1817
SLC25A6	WDR19	ordinary	32.7284
TNF	CEBPA	ordinary	13.9432
COMMD8	CUL5	ordinary	27.5626
RPL39L	UPF1	ordinary	36.0626
BRAF	CLCN6	ordinary	26.0605
CNGB1	TLN1	ordinary	42.7952
PIK3R1	VAMP3	redundant	47.0209
ETHE1	TST	ordinary	38.8689
DNAJC6	SNX9	ordinary	48.8229
ATM	MDM4	redundant	54.5028
SEC11C	SEC61A2	ordinary	55.4994
PPP2CB	RBL1	ordinary	46.1163
RFC5	KAT5	ordinary	50.3405
GPS1	LMO7	ordinary	73.3694
P2RX7	PPFIA1	ordinary	21.8586
ITPR2	MYL9	ordinary	33.0538
UBC	XRCC2	redundant	81.1477
CAMK2D	VCL	ordinary	18.0176
PIP5K1B	UBC	redundant	43.5512
GNAI2	S100A7	redundant	28.0566
PIK3CD	ARPC2	redundant	43.4147
SLC26A6	CLCA2	ordinary	71.0465
NCOR2	HIST1H2BH	ordinary	29.4362
SLC25A6	GNAL	redundant	22.5831
ERCC6	H2AFX	ordinary	27.2255
SNW1	HES1	redundant	25.058
CALM3	ANXA1	ordinary	99.5781
CERS2	SLC27A5	ordinary	20.6208
RPS27A	ISG15	redundant	55.2505
SLC25A4	ADCY7	ordinary	234.266
AAAS	WDR33	ordinary	45.1691
NEK6	NUP50	ordinary	16.9082
CD79A	RASGRP3	redundant	86.1329
PIK3R6	CBL	redundant	14.2262
ORAI1	TPM1	ordinary	51.9581
CTPS1	SLC25A12	ordinary	106.959
INPP5D	INPP4A	redundant	37.5843
PACSIN2	EGFR	ordinary	15.7416
GNAI1	GRIN2D	redundant	80.6263
TPCN1	PXN	redundant	120.222
SH3KBP1	ARPC5	redundant	15.244
PKM	LDHB	ordinary	20.6554
REEP5	GNB1	ordinary	37.1714
SEC23A	TMED2	ordinary	47.1045
CAMK2D	JAK1	redundant	22.1116
PIK3CG	BTK	redundant	187.681
FAM20A	LAMC1	ordinary	33.1547
MED27	LPL	ordinary	76.2568
ITPR2	PPP3R1	ordinary	35.4391
AK3	NME4	critical	25.5329
LPCAT1	MORC2	redundant	102.646
OCRL	SYT1	redundant	25.4908
PSMB2	TNFRSF1B	ordinary	37.707
RAD50	FEN1	ordinary	62.3794
GNB1	ATP1B3	ordinary	57.4362
IKBKB	REL	ordinary	14.158
DCTN3	AURKA	ordinary	83.1749
LIPT1	PDHX	redundant	53.9936
SYNJ1	PLA2G12A	redundant	70.325
CD79B	TRPC6	redundant	16.0024
HADHB	ACAA2	redundant	148.89
ATP2B1	TNNC2	ordinary	112.734
NUP205	FIP1L1	ordinary	38.2992
CLCN4	ANO10	ordinary	109.856
CACFD1	CPNE7	ordinary	25.1342
GMPS	GLUL	redundant	97.7218
MPHOSPH6	UTP4	ordinary	55.3352
PIP4K2C	FGF1	redundant	15.4698
TF	INPP4A	ordinary	90.4027
CLTB	ARPC4	ordinary	30.5026
COPS2	GAN	ordinary	24.7335
VAV2	PRKCA	ordinary	77.0417
SMS	MTAP	redundant	38.6626
VEGFA	AXL	redundant	30.0233
FCGR2A	VAV2	ordinary	83.8499
DENND1C	RAB8A	ordinary	45.2028
P3H3	COL13A1	ordinary	66.1805
NUP62	HSPA4	ordinary	45.7301
BRIP1	FANCE	ordinary	95.0768
TRPV4	ITGA1	ordinary	27.5779
GRAP2	PRKCQ	ordinary	31.027
EPN1	ARRB1	ordinary	25.1205
VAV2	RAC2	ordinary	106.844
PPP1R12A	MYH9	ordinary	31.429
STIM1	ATP2C2	ordinary	24.2704
ATF4	HSPA5	ordinary	19.1891
SEC11A	RPL23A	ordinary	29.4759
NUP43	DIAPH2	redundant	21.1148
ASB7	UBE2F	ordinary	29.074
PIP5K1B	PIK3AP1	redundant	36.7341
SNX9	LDLRAP1	ordinary	49.3823
MYO18A	CYFIP1	ordinary	69.3852
PDGFA	PDGFRB	ordinary	47.116
CCNA2	ORC2	ordinary	71.3908
CRLS1	ACSF3	redundant	16.1599
AKAP9	TCAP	ordinary	85.8071
VEGFA	FYN	redundant	25.362
TRPC6	VDAC1	redundant	29.8436
PDGFRA	PLCG1	ordinary	43.3319
H2AFX	HIST1H3H	ordinary	54.7711
COPS6	SOCS3	ordinary	29.3746
DCTN1	HSP90AB1	ordinary	19.1858
KITLG	SYK	redundant	30.6319
NRG1	FCGR3A	ordinary	48.0138
PIK3CG	ITK	redundant	209.767
AK9	ADCY4	ordinary	61.6925
TFDP2	CDC6	redundant	94.5663
PIK3CB	REPS1	ordinary	17.2862
CTSV	HLA-DQA1	redundant	36.5684
PDGFA	FGFR4	redundant	48.1403
CBL	EPS15	redundant	85.4471
ATP12A	SLC1A1	redundant	64.6678
SLC6A2	NEFL	redundant	39.6097
ATP1A1	ABCC9	ordinary	25.6431
PIK3R2	LCP2	redundant	21.3522
ARFGAP3	CD55	ordinary	16.6873
CLTB	ACTR3	ordinary	41.3643
TSC2	LAMTOR3	ordinary	25.7778
HIST1H2BD	NCAPD3	ordinary	40.604
RYR3	MYH3	ordinary	23.0039
ASNA1	SEC61A1	ordinary	20.62
CACNB1	DMD	ordinary	192.971
EXOSC5	WDR46	ordinary	53.7845
EME1	EXO1	ordinary	290.394
ASXL1	HIST3H2A	ordinary	19.3558
FGD1	RHOA	ordinary	22.0032
DNA2	UBA52	redundant	42.4758
CPT1A	ACSS2	ordinary	46.8918
ARHGAP42	RHOF	ordinary	16.6973
GALNT18	MUC20	ordinary	65.7713
ITPR2	PLA2G4A	redundant	31.0375
RBBP4	MEAF6	ordinary	65.543
ARPC5	WNT5A	ordinary	18.8026
PSMD10	TNFSF14	ordinary	15.6935
WNT3A	FZD4	ordinary	64.4575
FGF2	TEC	ordinary	63.9329
RAC2	RHOB	ordinary	42.6657
NUP107	GEMIN4	ordinary	36.7874
PSME1	CKS1B	ordinary	84.0605
MYH2	EXOC6	ordinary	62.8377
GABPB1	GABPA	ordinary	32.2048
AKT3	MDM2	redundant	13.8304
UBA6	UBC	ordinary	33.3199
GAB2	PLCG1	ordinary	58.1696
ITPR1	ITGB5	ordinary	63.6472
ARHGAP11B	RHOV	ordinary	32.0697
GRB2	WASF3	redundant	21.5048
SLC34A2	CAMK2G	ordinary	57.0288
SH3GL1	INPP4A	ordinary	39.7271
GBF1	COPB2	ordinary	35.1273
GPSM3	BDKRB2	ordinary	16.6115
ESPL1	NUP43	ordinary	77.8093
ACAT2	HMGCS1	critical	38.9791
PIK3R6	PLCG1	redundant	48.4522
PRKACB	GLI2	redundant	23.6777
PIK3CB	EPS15	redundant	46.7509
ANAPC2	IL6	ordinary	19.73
AHCYL2	CAMK2B	redundant	91.7775
BARD1	MAD2L2	ordinary	23.9329
CLOCK	PER2	redundant	96.1603
ARHGEF3	RHOQ	ordinary	39.2497
CSK	CD4	redundant	31.6881
USP2	RNF31	ordinary	32.1209
ATP2B4	DYSF	ordinary	15.8747
FKBP1B	MYL1	ordinary	42.7985
PIK3R2	AP2B1	ordinary	14.0907
RAD50	XRCC6	redundant	19.168
CATSPER2	GNAI2	redundant	14.912
NSMCE1	SUMO1	ordinary	33.6214
NUP155	HNRNPC	ordinary	55.1309
CACNA2D1	RASGRF2	ordinary	42.5615
GNAI2	CACNB3	redundant	18.2304
PIK3CA	SNX9	ordinary	89.0009
SRC	KIAA1549	ordinary	19.0905
CDK1	MAD2L1	ordinary	231.45
CA2	PAICS	ordinary	29.7981
GAB2	CD28	ordinary	53.8216
CD79B	CALM3	redundant	18.2326
PTPN3	SH3GL1	ordinary	34.6477
DAB2	EGFR	ordinary	15.4574
APP	STX1A	ordinary	78.5364
ITGA2	PTK2	ordinary	60.1539
WNT5A	PIP5K1A	ordinary	13.76
NUP85	AURKB	ordinary	169.65
MAT2A	PRMT3	ordinary	43.2155
TOP3A	LIG3	ordinary	51.3124
CHML	RAB3A	redundant	42.6055
ATR	CCAR2	ordinary	18.6214
POLR2H	ERCC6	ordinary	33.5046
CARM1	HMGCR	redundant	14.4667
AGPAT3	PLA2G4A	redundant	35.0556
GPS2	HIST1H2BD	ordinary	36.573
NEURL1	UBB	ordinary	46.7174
NEFL	CPLX1	ordinary	15.8946
STAT3	MMP3	ordinary	28.4532
HAGH	GSTM1	ordinary	14.3512
SLC7A11	SLC1A3	redundant	22.6932
PPARA	ACSL1	redundant	65.2684
SLC3A2	CAMK2G	redundant	44.8195
SCN8A	ATP1A1	ordinary	26.9629
PPP2CB	ARAF	ordinary	22.4606
BARD1	CHEK1	redundant	88.5477
TSC2	MLST8	ordinary	22.5836
SLC12A2	KCNK1	ordinary	81.5483
ARHGEF1	RHOA	ordinary	50.3599
TRPM7	UNC13B	ordinary	39.8515
IRAK1	FYN	redundant	25.8347
FANCA	FANCM	ordinary	103.388
CACNG4	CAMK2A	redundant	73.1373
CLTA	ARPC1B	redundant	46.5094
TBP	TP53	ordinary	19.7371
SYK	ITK	redundant	27.1358
POLD4	RPA3	ordinary	27.442
RANBP2	DDX20	ordinary	45.8541
RRP8	H2AFJ	ordinary	15.794
RRAGB	SLC7A6	ordinary	16.3386
PSMC2	KLHL12	ordinary	37.6834
FGFR4	RAC1	ordinary	23.5127
PIK3R6	BRK1	redundant	26.0331
COPS7B	FBXL7	redundant	12.7079
ARID4A	HIST1H2BD	ordinary	33.386
SLC37A1	G6PC3	ordinary	72.6807
COPS7A	DCUN1D1	ordinary	16.1524
XRN1	LSM5	ordinary	38.9808
AP2S1	VAMP2	ordinary	23.5986
PSMB9	CUL3	ordinary	101.601
GNG2	ITPR1	ordinary	102.102
C1D	RRP7A	ordinary	18.777
NCL	NOC4L	ordinary	16.1888
ERAP2	HLA-G	ordinary	22.0026
TACO1	CYCS	ordinary	32.5247
UIMC1	BARD1	ordinary	26.5662
FGFR1OP	CD3G	ordinary	13.6877
PIP4K2C	RAP1A	redundant	21.2424
PDZD11	ATP1B3	redundant	32.5102
RYR3	SLC24A1	ordinary	33.7826
INHBB	ACVR1C	ordinary	21.7338
MED19	CD36	ordinary	23.8975
EXOSC4	UTP14C	ordinary	65.627
JAK2	STAT5A	redundant	39.697
MMP7	LAMA3	ordinary	53.2889
WDR5	HIST1H3D	ordinary	24.0423
GTF2F1	MDC1	ordinary	45.0394
STON1	PIP5K1C	ordinary	19.6482
ARHGAP35	RASA1	ordinary	25.5945
SLC4A2	ANO1	ordinary	29.6949
RPL3L	UPF1	ordinary	171.998
ATG7	MAP2K2	ordinary	17.0247
ARRB2	TGOLN2	ordinary	20.5636
CHD9	TRIB3	ordinary	28.8799
CAMK2G	NEB	ordinary	90.3426
COPS4	FBXO2	ordinary	29.1262
STON2	PTPN13	ordinary	34.4568
SLC25A16	DLST	ordinary	27.2079
PDPN	DGKG	ordinary	52.4284
CEP250	AURKA	ordinary	105.396
DVL3	EZR	ordinary	38.1454
TLR4	MAP3K7	ordinary	13.4744
RYR3	MYL12A	redundant	21.5882
CD4	PLEKHA2	ordinary	18.7626
ITPR2	TNNC2	ordinary	126.648
CPSF6	PLCG2	ordinary	32.5714
SRSF10	YBX1	ordinary	26.0375
CEP78	AJUBA	ordinary	35.5155
CD3D	PIP5K1B	ordinary	27.0897
B4GALT7	SDC3	ordinary	20.9822
BLM	EP300	redundant	18.7261
EGFR	CD28	redundant	18.9504
MAP3K11	NRAS	ordinary	21.2053
NEFL	TMOD3	ordinary	41.9816
SPTBN1	YKT6	ordinary	32.1283
HSP90AA1	AURKA	redundant	123.479
PSME1	OAZ2	ordinary	26.8215
SYDE2	RHOH	ordinary	27.6344
NUP214	SNRPF	ordinary	14.2
PIP4K2A	CLTC	ordinary	26.3093
GRB2	RAC1	redundant	14.6055
CDK11B	CEP164	ordinary	23.9759
MAP3K7	MAP2K3	ordinary	38.4974
SH3GL1	VAMP3	ordinary	17.9683
RMI2	POLR2J	ordinary	58.5004
DYNLL1	RAB8A	ordinary	18.9842
CLTCL1	VAMP3	ordinary	37.4829
PLBD1	PLA2G4A	redundant	30.4451
PSMF1	TNFRSF12A	ordinary	36.2992
ITSN2	ARPC1A	ordinary	34.2532
SLC20A1	SLC9A8	ordinary	80.2898
NUP43	KPNA2	ordinary	99.2198
GSK3B	POLR2H	ordinary	36.6914
PIP5K1C	SH3KBP1	redundant	16.0111
TRPV3	SLC24A3	ordinary	33.3032
NBN	NEIL2	ordinary	14.1832
SLC8B1	MCOLN3	ordinary	22.2123
PDGFA	FGF2	redundant	26.403
FXYD6	CAMK2D	redundant	14.3405
INPP5K	PIK3CD	redundant	34.4691
IRAK4	WASF2	redundant	38.8847
ARHGAP12	RHOT2	ordinary	37.2204
ORMDL3	ACLY	ordinary	22.9617
AK8	WDR35	ordinary	15.3921
PSMD14	NUMB	ordinary	17.8553
TFPT	COPS7B	ordinary	22.34
POLE2	BRIP1	ordinary	135.664
CALM2	PDE4D	ordinary	28.0698
CATSPER2	TRIM72	ordinary	34.3993
NRG1	BCR	ordinary	27.7085
RAMP3	GNAS	ordinary	38.6613
SLC22A5	ATP1B3	ordinary	32.0508
PSMD1	UBC	redundant	17.199
NAGS	PDHA1	ordinary	55.0164
TGS1	HMGCS1	redundant	30.1263
CTSA	GLB1	ordinary	27.0974
UBXN7	UBE2D2	ordinary	35.2443
CACNB3	SORBS3	ordinary	28.2043
HLA-DPA1	ZAP70	ordinary	67.5132
PLA2G6	CAPZA1	ordinary	14.6199
ACSS2	GNPNAT1	ordinary	54.3017
ITPR1	CNGB1	ordinary	82.8757
GNB5	WASF2	ordinary	54.8341
PSMA4	PPP2R5E	redundant	25.5884
RNF111	GTF2H5	ordinary	44.1537
SYNJ2	EPS15	redundant	88.8819
TGFBR1	SMAD3	ordinary	21.9904
CACNB3	MYL6B	ordinary	48.1319
PIK3CA	NECAP2	ordinary	28.8819
PIAS1	SP3	ordinary	99.4176
PLA2G4A	AGPAT3	ordinary	35.0556
ATP1B3	KCNJ15	ordinary	31.5352
GBE1	GYG2	ordinary	43.4499
CACNB1	PYGL	redundant	73.1865
PI4K2B	CD3D	redundant	15.1838
CACNB3	SLC24A3	ordinary	18.9093
CTSS	TLR7	redundant	159.678
CALM3	TRPV4	ordinary	13.4179
ARHGEF6	RHOH	ordinary	141.875
PLCD1	DAGLA	ordinary	52.9943
HIST1H4H	H3F3B	ordinary	23.8866
SRC	FGF1	redundant	16.7463
PSMD8	BUB1B	ordinary	45.5858
TRPC6	SRI	ordinary	17.3952
NUP93	NXF1	ordinary	15.111
F5	SEC24A	redundant	33.3697
CDC42	PPP2R5D	redundant	13.4607
HMGCR	MORC2	redundant	63.5257
NUP153	GEMIN6	ordinary	17.0598
SEC11C	RPS7	ordinary	58.2275
GPD1L	GPAT4	ordinary	248.399
TPCN1	STXBP1	ordinary	104.075
RAI1	CLOCK	ordinary	48.4499
MAPK11	HIST1H3D	redundant	14.2139
ERCC2	POLR2L	ordinary	16.7579
GLCE	GPC6	ordinary	13.4367
PSMD9	ANAPC7	ordinary	27.3758
ATP6V1D	DTYMK	ordinary	30.4104
PRDX6	GSR	ordinary	47.0745
CBL	WNT5A	redundant	19.3634
GNPAT	ACLY	ordinary	40.2393
ARPC2	FZD4	ordinary	59.2922
ADRB2	MYO10	ordinary	44.511
CAD	VAMP2	redundant	43.1058
PSMB4	RELA	redundant	20.112
CPLX1	RAB3A	redundant	58.3436
DIAPH2	DSN1	ordinary	42.4217
STON1	SYT1	ordinary	35.5598
PSMD10	NUMB	ordinary	16.397
PSMC5	SPOP	ordinary	14.3268
ATM	GTF2H3	ordinary	41.1553
BRAF	MPRIP	ordinary	34.0539
RFC4	PALB2	ordinary	107.934
CREBBP	GRHL1	ordinary	29.9004
ADCY9	PRKAR2B	ordinary	36.6758
SOS1	VAV1	redundant	25.3189
CERS6	ATAT1	ordinary	18.1746
ARFGAP1	KDELR2	ordinary	56.852
UBE2V1	NOD2	ordinary	18.4448
HIST2H2BE	NCAPG2	ordinary	41.2202
CBLB	PRKCQ	redundant	59.6621
SLC24A1	TRPV3	ordinary	20.5302
GNG12	AKT2	ordinary	14.8514
PSME4	CUL5	redundant	59.6852
PIK3CA	TRIP10	ordinary	118.134
RPS11	BMS1	ordinary	13.2424
NCL	NOL6	ordinary	15.5679
SLC24A3	MCOLN2	ordinary	24.276
CAMK2B	GNAI1	redundant	91.1858
ARHGEF17	RHOA	ordinary	20.6642
ARHGAP19	RAC2	ordinary	41.9602
NUP107	HSPA5	ordinary	43.3892
CALM3	ATP2C2	ordinary	16.9739
PSMB6	CCNE2	redundant	21.825
P2RX4	CLCA2	ordinary	50.1601
EXOSC2	GMPR	redundant	90.8198
SLC39A6	PGLYRP3	ordinary	20.3764
PPAT	SLC3A2	redundant	56.6295
SUCLG1	DLD	ordinary	73.7068
NUP54	GEMIN4	ordinary	21.1215
RHNO1	RPA2	ordinary	51.3662
MND1	RPA1	ordinary	55.9352
SLC22A4	SLC9A6	ordinary	20.3515
CTSA	HLA-DPB1	ordinary	23.9422
WNT5A	DVL2	ordinary	22.7635
GRB2	FGF1	redundant	18.005
ARHGAP11B	CDC42	ordinary	25.8664
AGO2	NOTCH2	ordinary	46.3129
RPS26	UPF1	ordinary	16.6454
CACNA2D3	TPM3	ordinary	67.2027
POLD4	TOP3A	ordinary	28.2993
SRSF10	HNRNPA0	ordinary	81.5543
CACNB3	TMOD1	ordinary	70.5352
CACNB3	ATP2A3	ordinary	51.903
PI4K2B	VAMP3	redundant	14.2067
AKAP1	DMD	ordinary	104.724
SBF2	PPP2R5A	ordinary	30.7208
GGT7	CALM1	redundant	24.5788
FGFR1OP2	FCGR3A	ordinary	21.1911
TREM2	CUX1	ordinary	35.0034
NRAS	VCL	ordinary	32.0373
DNAJC6	AP1S1	ordinary	21.6058
ORAI1	NEFL	redundant	23.8747
GNB1	ITPKA	ordinary	44.3973
ALG10	STT3A	ordinary	29.5015
TBL1XR1	GLIPR1	ordinary	49.4262
CSF2RA	AKT1	ordinary	13.7488
CALM2	CLCA4	ordinary	112.631
RACGAP1	RHOA	ordinary	64.5786
PSMC5	GSK3B	redundant	19.1222
AP2B1	SYT1	ordinary	26.5599
GNA11	DAGLB	ordinary	27.6832
SLC24A3	ATP2B4	ordinary	29.243
KAT2A	TBP	ordinary	54.3125
TRPV3	PRKCA	redundant	24.3833
CCND3	E2F3	ordinary	28.3779
FGF2	CD247	ordinary	14.1319
CAMK2B	TMOD1	ordinary	415.481
POLE3	WRN	ordinary	33.5428
INPP5D	NECAP2	ordinary	34.9002
HLA-E	VAV3	ordinary	37.8968
ARRB2	VAMP7	ordinary	18.154
CDK4	E2F2	ordinary	40.8936
CD3G	BTK	ordinary	181.042
ERBB2	TRIM24	ordinary	16.3253
SUZ12	H2AFV	ordinary	56.9579
MSL1	HIST1H4I	ordinary	41.0234
ARHGAP44	RHOA	ordinary	35.712
SLC1A5	CTPS1	ordinary	28.2189
RABGGTB	RAB13	redundant	16.7227
CACNB3	VDAC1	redundant	13.8637
LYN	LCP2	redundant	33.9979
CHN2	RHOQ	ordinary	33.703
PDGFRB	WASF1	ordinary	18.58
CAMK2A	GNAI2	redundant	82.0656
APP	PPP3CA	ordinary	57.923
RIOK3	RPS5	ordinary	17.1499
NCOA2	HMGCR	redundant	35.9802
JAK2	MAPK3	redundant	47.5389
ESPL1	CENPP	ordinary	36.4251
PSMD5	TNFRSF12A	ordinary	37.1536
RNF4	UIMC1	ordinary	16.39
GNAI1	NCALD	ordinary	43.8634
DVL1	ICOS	ordinary	39.6691
SEC11C	RPL12	ordinary	39.3633
CYLD	TAB2	ordinary	60.0003
CRTAP	COL13A1	ordinary	56.3126
PIP5K1B	BTK	redundant	25.9096
FAR2	ACAA1	ordinary	112.972
MTMR3	PPP2R5D	redundant	36.3546
ATP6V0E2	ABCC4	ordinary	46.054
PSMB9	ANAPC7	ordinary	26.4146
PIK3CD	CYFIP2	redundant	34.0565
PSME3	AJUBA	redundant	36.4541
DAB2	ARPC3	ordinary	22.3734
EZH2	H3F3B	ordinary	17.5802
DDAH1	ASS1	ordinary	30.3163
DVL2	NCK1	redundant	28.9098
FGFR1	CD80	ordinary	42.3957
CAMK2G	MDM2	redundant	25.8238
BTC	FYN	ordinary	43.2708
FAM20C	IL6	redundant	21.4749
PIP5K1C	PDGFRB	redundant	47.7047
TPR	HSPA4L	ordinary	25.8697
RAP1GAP	RAP1A	ordinary	29.7982
USP2	TNF	ordinary	31.0123
FGFR4	FCGR2A	ordinary	42.0492
HSPA8	SNX9	ordinary	44.9067
STIM1	ANXA1	ordinary	106.072
ARHGAP17	RHOF	ordinary	20.3962
ADAM9	COL17A1	ordinary	28.4807
HLA-E	CNTRL	ordinary	18.9632
PRKAB2	RRAGD	ordinary	153.942
DCAF6	CUL4B	ordinary	42.5788
NDC1	SNUPN	ordinary	49.4031
HIST1H2BK	KDM4A	ordinary	35.8105
AK8	ATP6V1D	ordinary	16.2281
NFYC	GGPS1	redundant	19.756
CHMP6	UBB	ordinary	22.3241
CAMK2B	ATP1A2	redundant	519.198
PSMC4	RELA	redundant	12.996
RBBP7	HIST1H2BH	ordinary	29.9305
SEH1L	SNRPD3	ordinary	14.7217
PIK3CA	FCHO1	ordinary	38.5933
AAAS	RAN	redundant	30.9905
POLR2J	NELFE	ordinary	67.5469
FGFR4	CYFIP2	ordinary	20.8702
AKAP1	NFATC1	redundant	48.5629
PIP5K1C	FYN	redundant	31.5288
PTPN11	BAG4	redundant	23.8738
ATP6V1C1	PYGL	ordinary	68.4489
TFDP1	SUZ12	ordinary	22.4655
AP2A1	ROR2	ordinary	38.2895
SLC38A5	SLC4A7	ordinary	17.206
TGOLN2	PIP5K1B	ordinary	25.4447
EXOSC8	DDX49	ordinary	28.2995
NME1	ATP6V1A	ordinary	42.5522
GNAI2	ITPKA	redundant	26.0082
SYNJ2	CD4	redundant	28.9092
EXO1	POLK	ordinary	101.62
TRIO	RHOQ	ordinary	64.6789
EPS15L1	ARPC5	ordinary	13.1116
PIP5K1C	CBLB	redundant	48.3377
MPC2	PDHA1	ordinary	45.2041
KAT5	CHEK1	redundant	66.3768
CD80	VAV1	ordinary	102.243
EPHB1	EFNB2	ordinary	13.0828
DNA2	FEN1	ordinary	180.909
PEBP1	TRIM24	redundant	73.2027
ESPL1	WAPL	ordinary	47.6738
SPRED3	HRAS	redundant	28.4111
CHCHD4	CMC2	ordinary	56.1755
POLR2D	MDC1	ordinary	79.4396
ARHGAP25	RHOT1	ordinary	17.29
AAK1	SLC2A8	ordinary	21.8929
INPP5D	GRB2	redundant	30.6702
EFNA3	RHOA	ordinary	29.2685
PIK3C2B	EPS15	redundant	78.3178
ST3GAL6	SLC35A1	ordinary	16.3893
PSMC1	BUB3	ordinary	41.1636
TRPC4AP	MYH11	ordinary	40.2773
SLC8A1	ATP1A2	redundant	101.296
ACTR2	IGF2R	ordinary	79.9667
PSMC3IP	HIST1H4I	ordinary	94.9696
ACOT2	ACAT1	ordinary	112.931
PSMA3	PPP2R5E	redundant	32.1812
EIF5	EIF4E	redundant	23.0866
ARPC1A	TFRC	ordinary	36.5697
SLC38A2	ASNS	ordinary	26.4705
EXOSC2	UTP3	ordinary	40.5153
ARPC1A	IGF2R	ordinary	19.9657
PSMA7	WTIP	ordinary	18.8767
WRN	PARP1	redundant	69.4312
NEFL	SORBS1	ordinary	150.118
PPP1CB	PER1	redundant	40.782
STAT4	TALDO1	redundant	18.5666
NUP107	PHAX	ordinary	41.7158
PSMB9	NUMB	ordinary	29.906
CCNB2	PPP2R5B	redundant	68.2472
PSMB6	RPS27A	redundant	81.2837
C1QC	C2	ordinary	282.345
NDC1	HDAC4	ordinary	47.1424
SUV39H1	HIST1H2BJ	ordinary	67.2278
ARHGAP18	CDC42	ordinary	22.3862
2020-09-02	HAUS7	ordinary	33.4069
PSMA6	NPEPPS	ordinary	42.6061
LGMN	HLA-DRB1	redundant	47.2513
SPCS1	SSR1	ordinary	23.9897
PIP5K1B	CD86	redundant	37.0134
HDAC2	H2AFJ	ordinary	13.6051
PSMC1	NFKB2	redundant	21.6718
GABPA	POLG2	ordinary	36.9048
PSME2	GLI3	redundant	35.5196
ACSS2	HMGCS1	redundant	66.0602
CD79B	DAPP1	ordinary	15.8795
GSS	GSTM3	ordinary	13.9472
KIF15	HLA-DPB1	ordinary	17.9797
PSMD3	RELA	redundant	16.541
LIAS	MARS2	critical	28.7876
SKP1	AURKA	ordinary	93.3103
CACNA1A	CLCA4	ordinary	121.638
ARHGEF39	RHOA	ordinary	57.5048
FGF2	LCK	ordinary	17.6198
ZMYM2	BAIAP2	ordinary	15.9615
SRI	LMOD1	ordinary	111.196
BLM	FAAP24	ordinary	108.554
PIK3R5	SH3KBP1	redundant	43.9287
RAB3GAP1	BICD2	ordinary	22.4715
MMP3	COL9A3	ordinary	24.4353
CRTAP	COL1A2	ordinary	64.6653
ORAI1	PPFIA1	ordinary	27.6633
ACTN2	PRKCB	redundant	47.6771
PPAT	GCLM	ordinary	33.0043
ARHGEF4	RHOA	ordinary	26.7094
ARFGAP1	RAB1A	redundant	38.3464
PYGO1	H2AFZ	ordinary	33.9097
CCNB2	CENPL	ordinary	204.518
PSMB3	CDC27	ordinary	37.9936
XRCC1	UBC	redundant	31.407
PIP4K2C	PDGFRB	redundant	30.4417
ATP2B1	TLN1	ordinary	17.6417
GGT6	NCALD	ordinary	81.7709
ACLY	FASN	redundant	132.805
DHCR24	SCAP	ordinary	33.1187
CUX1	RHOA	ordinary	20.9707
TNFAIP3	RNF31	ordinary	17.7563
ASPH	ANXA6	ordinary	16.7207
KITLG	FGF7	redundant	44.5433
NBN	FANCD2	redundant	62.2616
TRPC6	MYL2	ordinary	64.9409
MTMR3	PITPNM3	ordinary	57.002
ARHGEF10L	RHOB	ordinary	114.445
SPCS1	SEC61B	ordinary	51.2182
PSME4	TRAF2	redundant	20.7264
EED	H3F3A	ordinary	27.7055
USP1	FANCM	redundant	89.7789
BRCA1	UBE2I	redundant	59.2592
GSK3B	TAF1A	redundant	59.0425
LCK	PDCD1	redundant	184.663
FAM13B	RHOB	ordinary	24.2788
STXBP1	SLC6A11	redundant	16.9963
AGPAT3	PLA2G6	ordinary	40.2836
CAPN1	CDH1	ordinary	23.0336
CNGA1	PYGL	redundant	45.1295
ICOS	FGFR1OP	ordinary	27.3195
POLR2K	HIST1H3D	ordinary	34.4448
TRPC1	PXN	redundant	32.4889
PIP5K1A	WASF3	redundant	22.0596
GNGT1	PDPK1	ordinary	60.8121
CASP6	VIM	ordinary	13.613
SLC24A3	CAMK2B	redundant	90.026
PGM2	SLC37A4	redundant	26.9623
PIK3CA	PACSIN3	ordinary	38.2551
DVL3	LCP2	redundant	35.2295
BOP1	UTP3	ordinary	29.785
CD80	LCP2	ordinary	212.884
NBN	RPA3	redundant	26.0636
HADHB	CS	redundant	168.491
PIK3R2	AP2M1	redundant	40.6044
GPSM1	CXCL5	ordinary	16.4868
ATP1A2	SLC6A2	redundant	112.839
BTC	SOS1	ordinary	44.621
PSMC3	BIRC3	redundant	15.4497
PLCB2	DGKD	ordinary	24.0437
PRKCE	SHC1	ordinary	31.133
PSMA5	FBXL7	redundant	22.7023
POLR2K	HIST1H4I	ordinary	88.0731
ITPR1	RASGRF2	ordinary	90.5868
PSME3	LTB	ordinary	19.8118
SUMF2	ARSJ	ordinary	35.6389
PSMA3	OAZ1	ordinary	38.2054
FAM20C	SDC2	redundant	23.574
MOV10	NOTCH4	ordinary	14.1167
PAFAH1B1	DYNC1H1	ordinary	22.1733
RPS11	RRP7A	ordinary	41.4483
CHRNA1	CACNA1C	redundant	15.7745
RAB3A	SLC1A3	ordinary	16.5925
SNX18	EGFR	ordinary	22.0644
ALG3	ALG9	ordinary	51.1004
RABGGTB	RAB27B	ordinary	22.3028
MMP15	NID1	ordinary	34.4977
ECT2	RHOV	ordinary	61.5207
FGFR3	FCGR2A	ordinary	37.7135
RPS13	TBL3	ordinary	23.6894
BARD1	MNAT1	ordinary	16.7886
PRKAA2	ULK1	redundant	84.608
CAMK2G	GNAI1	redundant	31.3016
RAD51C	RAD51	ordinary	151.778
AGPAT5	LPIN1	redundant	129.673
ARRB1	VAMP2	ordinary	49.8777
DNAJB1	HSPA2	ordinary	16.1626
TPCN2	ACTG2	ordinary	49.6796
CEL	LCAT	ordinary	17.4986
CALM2	P2RX4	ordinary	24.6564
HLA-E	MYO18A	ordinary	49.2325
PIP5K1A	PIK3AP1	redundant	26.2031
TOMM5	PINK1	redundant	83.8017
RUNX3	TEAD4	ordinary	23.9167
SPTSSB	ACLY	ordinary	42.2817
PTK6	KHDRBS3	ordinary	53.5365
PSMD13	SPOPL	ordinary	26.4053
COPS6	ASB6	ordinary	14.4381
ACOT1	AACS	ordinary	29.6124
MYO9B	RAC1	ordinary	44.884
PLCD4	DGAT2	ordinary	96.6176
OPLAH	TTLL1	ordinary	14.7527
GNAI1	STIM1	ordinary	57.5152
SRGAP2	RHOG	ordinary	32.2304
CATSPER2	SLC8B1	redundant	15.3025
ARRB2	CD3G	ordinary	75.7344
PPP1CB	CRY1	ordinary	41.9632
CALM3	PDE4A	ordinary	12.7406
BRCA1	POLH	ordinary	115.406
ARHGAP20	RHOV	ordinary	55.7204
GAB2	LCK	ordinary	34.8373
RPS27A	INPP4B	redundant	17.4056
ITPR2	PRKCZ	redundant	35.7115
NEDD8	UBE2M	ordinary	62.203
TNKS2	AXIN1	ordinary	24.8744
PIP5K1A	PLCE1	ordinary	37.0575
MAP2K2	KDM7A	ordinary	26.0188
MYD88	FGFR4	ordinary	40.8597
DCTN1	NR3C1	ordinary	30.4115
COASY	ACSL4	ordinary	21.9863
RYR3	PPFIA3	ordinary	25.8307
CALM1	INPP5D	redundant	21.7521
VPS4A	PPIA	redundant	28.3221
CLTA	IGF2R	redundant	29.2267
PIK3CA	INPP4B	redundant	15.7316
HGF	TEC	ordinary	62.622
PRMT5	H2AFX	redundant	19.1002
NUP85	GEMIN2	ordinary	84.5792
GMPR	ADSSL1	ordinary	157.441
SLC1A3	NICN1	ordinary	47.152
PSMD3	RBX1	redundant	17.1929
HDAC2	HIST1H2BJ	ordinary	36.8355
ARHGEF35	RHOJ	ordinary	20.0053
PSMD7	CDC20	ordinary	63.6184
CACNA2D1	ATP2C1	ordinary	74.8259
EXOSC8	EMG1	ordinary	26.0383
TRPM7	SYT1	redundant	34.9224
CCNB1	AHCTF1	ordinary	45.9637
PRKAG2	LAMTOR1	ordinary	17.5078
COPS7B	KLHL2	ordinary	32.2439
RHOB	MYH11	ordinary	38.6175
FOLH1	TTLL7	ordinary	30.8628
TRPV4	MYBPC2	ordinary	43.5384
CYBRD1	CP	redundant	20.7497
CTSC	HLA-DRA	ordinary	42.7298
PPP2R1A	MARK3	ordinary	23.3119
HMOX1	BLVRB	critical	13.6622
PIK3CA	ACTR3	redundant	39.6662
TRPC6	ATP2A2	ordinary	68.1842
CD79A	ITPR3	redundant	31.1211
ITPR2	MYH11	ordinary	67.1811
CAMK2D	ACTG2	ordinary	33.4409
PIP4K2C	PIK3C3	redundant	21.5893
XRCC1	RFC5	ordinary	155.317
PIP4K2B	TEC	redundant	67.572
CPSF6	GRAP2	ordinary	27.0379
STON2	ARPC4	ordinary	38.7103
GNAI2	STIM1	ordinary	31.3678
GLA	GLB1	ordinary	30.2518
ATP6V0A1	SLC25A10	ordinary	13.4611
UBA52	CD3D	redundant	18.0503
ITPR3	CPLX1	ordinary	26.7945
B3GNT8	MUC16	ordinary	46.7636
MAP2K4	MAPK8	redundant	12.8154
MID1IP1	ELOVL5	redundant	15.8704
PIP5K1B	MTMR1	ordinary	26.0431
GNG11	SYNJ1	ordinary	19.4836
AKT1	RPTOR	ordinary	39.4955
HSP90AA1	BAG4	redundant	23.0571
ENPP1	ACP5	critical	30.8595
HSP90AA1	TDRKH	ordinary	14.884
SKIV2L2	DIEXF	ordinary	39.2246
TTF1	HIST1H2AE	ordinary	29.7541
COPS4	DCAF16	ordinary	34.8647
UBB	BRCA1	redundant	46.5612
NUPL2	CPSF2	ordinary	19.771
DVL1	FGF2	redundant	21.016
PDGFRA	FGFR1	ordinary	41.6092
TGS1	SLC27A1	ordinary	46.9838
P4HA2	COL5A1	ordinary	103.237
TREM2	PDPK1	ordinary	51.2362
KCNC3	ATP1A2	ordinary	102.675
DVL3	LAT2	redundant	36.2594
NADK	SLC25A6	ordinary	13.0865
ARFGAP3	TMED10	ordinary	23.9634
TRPV4	NFATC1	redundant	26.9389
CALM3	TCAP	ordinary	80.6439
DVL3	CTNNB1	redundant	40.9061
LEF1	HIST1H3H	ordinary	44.01
NDC80	STAG2	ordinary	58.0467
SLC1A1	LRRC49	ordinary	44.4042
IGF2R	MYO10	ordinary	113.059
TCIRG1	SLC25A5	ordinary	16.1632
PPFIA3	VAMP2	ordinary	24.0778
CACNA2D4	RASGRP2	redundant	19.2396
BLNK	DGKH	redundant	55.2668
AKT2	PDE3B	ordinary	13.9355
MAPK1	SPRY2	redundant	37.1443
POLH	XRCC2	ordinary	113.241
VAMP8	ARPC5	redundant	27.4492
PSMC1	WTIP	ordinary	17.3932
ORAI2	CACNB3	redundant	32.1731
PSMD6	ANAPC11	ordinary	24.4171
EPHA1	EFNA5	ordinary	34.6431
POLR2L	H2AFJ	ordinary	64.594
DVL2	IGF2R	redundant	24.6098
PSMC1	PPP2CA	redundant	12.9617
RBBP5	H2AFV	ordinary	37.0535
EHMT1	HIST1H3D	ordinary	16.0414
GTF2H1	NCBP1	ordinary	44.9893
COPS7B	FBXL3	ordinary	18.859
ALS2	RAB5C	ordinary	35.1953
GNA11	INPP5B	ordinary	35.1417
CPT1B	MORC2	ordinary	58.0073
CD14	TRAF3	ordinary	15.39
RAD50	XAB2	ordinary	19.6774
SUMF2	ARSB	ordinary	21.824
PIK3C2B	DAB2	redundant	41.6946
GNB5	ERLIN2	ordinary	46.8571
PSMD6	GTSE1	ordinary	83.9649
CD79B	PIK3R1	ordinary	52.2486
SLC9A3	SLC4A7	ordinary	15.3634
PPP1CA	TGFBR1	redundant	26.1616
RTF1	UBE2B	ordinary	24.3892
GNB1	LCK	ordinary	32.1859
EXOSC1	FBL	ordinary	38.3478
ADAMTS3	COL5A3	ordinary	55.0904
LCLAT1	ACLY	ordinary	85.6934
MCOLN3	NFATC3	redundant	13.6353
BLM	POLR2E	ordinary	18.9831
SLC1A3	QARS	redundant	75.6037
KIF18A	HLA-DQA2	ordinary	54.1347
DYNC1LI1	DIAPH2	ordinary	16.6502
SEH1L	HSPA4L	ordinary	18.8794
TCF7L1	HIST1H2BK	ordinary	37.4172
PKM	ATP6V0B	ordinary	21.4896
PIK3CB	PDPK1	redundant	63.1834
GNG4	AKT3	ordinary	28.4774
SLC35B3	CHST7	ordinary	50.1366
SRSF10	DHX9	ordinary	99.2744
EGFR	WASF2	redundant	19.3993
ARHGAP31	RHOC	ordinary	21.8686
SEC11C	RPS17	ordinary	50.5065
STON1	ACTR3	ordinary	13.1634
SEC23A	LMAN2	ordinary	64.3959
PLEKHG5	RHOH	ordinary	24.4484
BARD1	HMGN1	ordinary	53.7276
GPSM2	CXCL8	redundant	13.6041
UBC	XRCC3	redundant	66.3246
CD79A	TRPC6	redundant	24.2113
CACFD1	VIM	ordinary	17.1434
PIP5K1B	BCR	redundant	26.2704
CCNK	CHEK1	ordinary	59.9985
PLCB4	DGKG	ordinary	89.596
MAPK3	ABI2	redundant	64.5594
ABCC9	ATP1B1	ordinary	37.815
NUP214	CPSF2	ordinary	23.0083
TCIRG1	SLC25A10	ordinary	27.2459
EP400	HIST1H2AC	redundant	18.5475
ACTN2	HRAS	redundant	47.8483
EDC3	LSM1	ordinary	19.3818
PSMB10	PPP2CA	redundant	29.2043
PDE1B	GMPR2	ordinary	18.2195
COPS2	LMO7	ordinary	70.5408
PIK3C3	MAP1LC3B	ordinary	14.5654
DCTD	RHCG	ordinary	66.2669
PSME4	LIMD1	ordinary	58.4368
SLC39A2	KCNJ11	ordinary	64.8111
ACOT2	HADHB	ordinary	108.741
ABCB10	HMOX2	ordinary	44.2726
PGK1	GAPDH	ordinary	40.5605
RXRA	PDHX	redundant	21.7883
ARHGEF39	RAC2	ordinary	79.9777
PSMB5	BUB3	ordinary	38.844
BTK	ITPR1	redundant	124.24
P4HA2	COL4A6	ordinary	79.4813
PSMC3	NFKB2	redundant	27.2994
RPS15A	FBL	ordinary	92.6434
UAP1	ALG14	ordinary	20.6971
FCGR1A	FGFR4	ordinary	28.1448
PKN1	PPP1R14A	critical	23.1541
ERAP2	HLA-B	ordinary	64.617
MTM1	PPP2R5D	ordinary	20.3464
SEC11A	RPL39L	ordinary	51.1731
MED22	FABP4	ordinary	24.586
CDKN1B	CCNA1	redundant	16.1127
MYD88	RHOA	ordinary	72.6921
HADHA	ACSF3	redundant	32.7457
LCK	CTLA4	ordinary	97.4434
PSMD14	REL	ordinary	18.7016
TOP3A	NBN	redundant	61.2094
FIG4	RUFY1	redundant	79.2469
APP	RASGRP1	redundant	34.2609
KIF18A	ACTR1A	ordinary	56.0863
ITPR1	MYL1	ordinary	85.1901
DEPDC1B	RHOU	ordinary	111.318
COPS4	STON2	redundant	54.0072
PSMA4	SPOPL	ordinary	34.6719
PTEN	VAV3	redundant	45.5334
CAMK2G	ITGA1	ordinary	41.0661
SOS1	PAK2	redundant	95.3778
SOCS5	NEDD8	ordinary	55.754
FYN	JAK2	redundant	15.2831
EHMT2	HIST1H3D	ordinary	15.6084
POLD4	BARD1	ordinary	22.7101
SPCS1	RPS18	ordinary	69.9639
ATP2B4	NEB	ordinary	81.6259
RPS3A	TBL3	ordinary	19.2712
ACTR3	SYT8	ordinary	24.2255
HIP1	WNT5A	ordinary	52.1876
PRMT6	H3F3A	ordinary	58.9044
ATP2B1	PRKCZ	redundant	15.6457
P2RX4	RASGRF2	ordinary	12.8119
B3GLCT	SPON1	ordinary	13.4853
DBF4	MCM5	ordinary	99.4906
PSME3	CDC20	ordinary	63.9861
CD80	RHOA	ordinary	74.4742
ATAT1	GNPNAT1	ordinary	17.815
LCK	STAT5A	redundant	103.73
POLR1D	H3F3A	ordinary	15.9595
POM121C	SP100	ordinary	35.3408
MED15	FABP4	ordinary	33.9118
ACSL3	ELOVL1	ordinary	27.7445
PIP5K1C	SH3GL1	ordinary	28.7933
CDKN2A	RUNX3	redundant	51.433
PSMC2	LNPEP	ordinary	20.8194
CDC42	CENPA	ordinary	80.1335
RRAGC	SLC7A6	ordinary	24.9106
SLC9A5	SLC9A7	ordinary	25.7864
BRCA1	HIST1H2BH	redundant	64.1546
RAP1B	MAP2K1	ordinary	18.0399
PSMC2	VHL	ordinary	17.2979
TRIP10	RHOT1	ordinary	104.264
PDCD1LG2	CD3D	ordinary	32.9146
ARHGAP10	RHOBTB2	ordinary	54.6669
IL1RAP	BTK	ordinary	12.9534
PSMB10	TNFSF12	ordinary	45.3094
SPCS3	SEC61G	ordinary	21.5502
ATXN7	HIST1H3H	ordinary	50.8481
PPP2R2A	FOXM1	ordinary	118.389
FZR1	MCM5	ordinary	71.2761
USP13	BECN1	ordinary	91.2901
H2AFV	H3F3B	ordinary	16.1436
2020-03-02	SLC3A2	ordinary	72.1588
GRIN2D	MYL12B	ordinary	71.2723
ARHGAP4	RHOU	ordinary	71.7545
SEMA3A	DPYSL3	ordinary	13.333
ORAI2	CALM1	redundant	39.8018
PSME4	OAZ2	ordinary	28.6548
ATP1B1	GNG4	ordinary	27.4826
TRPC4AP	SORBS1	ordinary	136.34
CCNK	POLR2A	ordinary	63.085
TDP1	PRKDC	redundant	47.4029
SEC16A	SEC31A	ordinary	31.1859
NEDD8	UBE2F	ordinary	49.0029
RABGGTB	RAB5B	redundant	51.6353
VAMP3	INPP4B	ordinary	17.2392
RMI2	FEN1	ordinary	210.468
AAAS	CPSF4	ordinary	32.3053
SLC6A15	ACTN2	ordinary	50.6086
PGM2	TKT	redundant	17.9929
SOCS3	STAT1	redundant	55.75
PSMA5	EGLN3	ordinary	18.1982
SLC6A9	SLC9A8	redundant	41.7087
TP53BP2	TP53I3	ordinary	16.0895
SLC5A6	AHCYL2	redundant	32.6221
NADK	PKM	ordinary	23.2386
PSME3	MAP3K14	redundant	20.4136
ATP2B4	MYL12B	ordinary	13.1411
FGFR1	CYFIP2	ordinary	16.018
TP53	CABIN1	ordinary	43.3886
PSMC4	PPP2CB	redundant	25.9208
CBFB	LEF1	ordinary	21.0424
PIK3CB	INPP5J	redundant	36.0426
POM121	WDR33	ordinary	37.4958
UBA52	VAMP8	redundant	102.389
FOLH1	TPGS2	ordinary	42.4632
VEGFA	PLCG1	redundant	62.6752
DVL1	KDR	redundant	24.5093
CCT5	BBS4	ordinary	40.861
PECR	PHYH	critical	175.484
TRPC4AP	TNNT3	ordinary	54.1709
PIP4K2A	FRS2	redundant	15.2734
ZCCHC11	EIF4A1	ordinary	29.3484
BIN1	TGOLN2	ordinary	49.4622
PSMA1	LTB	ordinary	15.2433
DVL3	IRAK4	redundant	78.8892
ESPL1	AHCTF1	ordinary	75.9443
STON1	SLC2A8	ordinary	19.7425
STARD8	RHOH	ordinary	61.3223
PSMB6	UBC	redundant	22.4134
PLCG1	DAGLA	redundant	79.3747
GPSM2	GNGT1	redundant	50.3339
PKM	ATP6V1B2	ordinary	17.1213
EYA2	HIST2H2BE	ordinary	30.651
GMPPB	ALG2	redundant	43.4084
CNGB1	ATP2A2	ordinary	86.0906
PSMD4	ITCH	ordinary	27.1174
CNOT11	EIF4A2	ordinary	13.4557
CACNA1C	DMD	ordinary	74.6239
PPM1A	PRKAG2	ordinary	37.8462
COPS7B	ASB8	ordinary	130.34
CARM1	AGT	redundant	30.2362
FCGR2A	SYK	ordinary	22.6573
CHST12	CSPG4	ordinary	42.4151
SRC	TRAK1	ordinary	124.412
LRIG1	EGF	ordinary	107.015
CLASP1	DIAPH2	ordinary	26.9965
CUL5	RPS27A	ordinary	33.699
DCTN1	AR	ordinary	38.2758
ATP6V1C1	PNP	ordinary	55.7783
TRPV3	MYBPC1	ordinary	76.1182
CD3E	PRKCQ	ordinary	33.5109
EGFR	PIP5K1A	redundant	18.4962
CYBRD1	SLC40A1	redundant	34.8875
GMPS	LARS	redundant	70.7728
RYR3	CNGB1	ordinary	55.7311
CBLB	ITPR3	redundant	76.9989
ITPR3	ACTG2	ordinary	58.3569
ALAS1	PDHB	ordinary	160.098
FAAP20	FANCD2	ordinary	26.4069
MTMR9	PPP2R5B	redundant	13.255
SPTBN2	ACTR10	ordinary	22.9389
ARF3	BET1	ordinary	14.5159
SRC	FCGR3A	redundant	34.8191
ATP6AP1	AK9	ordinary	52.0573
LRP5	GSK3B	ordinary	21.9891
ELOVL7	ACSL1	ordinary	71.5239
DNM1	SLC2A8	redundant	22.931
IRAK1	CUX1	redundant	23.2303
HADHB	DBT	redundant	133.807
NBN	POLE4	redundant	19.5967
MBOAT7	PLA2G4D	redundant	32.7224
STIM1	NEFL	redundant	38.4041
HLA-DRA	LCK	ordinary	109.973
COPS2	DCAF7	ordinary	20.5364
ATP6V0D1	UPP1	ordinary	47.181
FBXO10	CUL1	ordinary	24.0868
PIK3CD	PTPN13	redundant	38.7393
TOP3A	GTF2H3	ordinary	45.4632
PEBP1	MAP2K2	redundant	87.6428
FNBP1L	SCARB2	ordinary	27.3417
TRPC4AP	CALM3	redundant	17.2261
MYO1C	HIST1H3H	ordinary	42.3045
NUP210	SUMO1	redundant	20.4396
B3GAT3	BGN	ordinary	39.096
POM121	INCENP	ordinary	91.3931
GNGT2	ITK	ordinary	100.528
PSMD6	PPP2R5A	redundant	41.8743
ITSN2	EPS15L1	ordinary	36.1734
DCAF11	NEDD8	ordinary	43.0423
CDK1	DYNLL2	ordinary	75.586
THEM4	ACSF3	ordinary	13.7154
BIN1	VAMP2	ordinary	68.14
RPS5	WDR46	ordinary	49.5174
TRPV3	STXBP1	ordinary	24.5853
TRAF6	FCGR1A	redundant	13.0814
RPA3	RAD51AP1	redundant	90.7377
MAPK3	BLZF1	ordinary	50.0154
ITPR1	SLC24A1	ordinary	74.1536
PLCG2	TEC	ordinary	74.8586
COPS5	CUL3	ordinary	73.1217
PIP5K1B	PIK3CB	ordinary	24.652
FXYD3	KCNQ1	ordinary	35.1622
CA9	NT5E	ordinary	90.1951
SRI	ATP2B4	ordinary	21.0345
PSMD14	APC	redundant	29.1439
SEC11A	RPS28	ordinary	18.2241
POLR2H	HIST1H4I	ordinary	69.9684
SLC25A5	ATP6V0E2	ordinary	58.5611
IRAK1	MYO18A	redundant	61.1299
PDGFRA	WASF3	ordinary	20.2603
SMAD4	CDKN2B	critical	12.8358
GNAI1	CALM1	redundant	36.7888
COPS8	CISH	ordinary	57.5055
CSNK1E	DVL3	ordinary	48.6186
ARHGAP35	HRAS	ordinary	37.5372
COPS5	FBXL7	redundant	15.9918
SH3GL1	ARPC1A	ordinary	29.1172
PTEN	FRS2	redundant	15.3835
TOMM20	HSPA9	ordinary	33.5492
FN1	MAP2K2	ordinary	33.3348
AHCYL1	MYL2	ordinary	69.297
PAK2	CALM1	redundant	34.4985
RNF40	HIST1H2BJ	ordinary	25.6501
PSME2	ANAPC2	ordinary	34.6995
RMI1	RFC4	ordinary	154.968
RBL2	CDC6	ordinary	81.9464
GPSM3	GNAI2	redundant	112.174
FGFR1OP	RHOA	ordinary	24.8563
HDAC10	HIST1H2BD	ordinary	38.3809
TRPC4AP	PXN	redundant	33.8211
NUP160	HSPA4L	ordinary	21.8528
RB1	CDT1	ordinary	45.206
GAB2	MYO18A	ordinary	85.3958
ZDHHC2	SLC27A5	redundant	19.6692
ARHGAP5	RAC3	ordinary	26.5337
EXOSC5	RPS6	redundant	48.8779
HDAC1	CDK1	ordinary	90.8674
CDK1	H3F3A	redundant	101.454
POM121C	HSPA4L	ordinary	22.8512
NFIX	POLR3H	ordinary	140.314
AXL	GRB2	ordinary	24.3359
PIK3R5	STON2	redundant	41.14
DIAPH2	NUP43	ordinary	21.1148
TCIRG1	AK9	ordinary	64.9954
ARHGAP35	RHOT1	ordinary	40.085
SLC38A1	ACTN2	redundant	48.6777
PSMC3	TPP2	ordinary	15.7258
NME1	IFT122	ordinary	23.8087
PACSIN3	DAB2	ordinary	29.1966
SAE1	SUMO3	redundant	82.9248
OCRL	EGF	redundant	62.0917
ARHGAP19	RHOG	ordinary	13.1384
CHN2	RAC3	ordinary	24.1081
POLE2	EXO1	ordinary	179.382
RPS23	UTP14C	ordinary	41.6702
PSMD10	HNRNPD	ordinary	43.5142
PSMB10	TNFRSF11A	ordinary	86.5846
TAF5L	HIST1H3H	ordinary	53.5088
COPS6	BTBD1	ordinary	48.4983
SF3B1	HIST1H3H	ordinary	38.1366
PLD1	PITPNM3	ordinary	28.2927
ERBB3	SHC1	ordinary	76.7785
SLC1A3	CAMK2A	redundant	78.8779
CALM1	STXBP1	ordinary	12.7394
AK9	ATP6V1E2	ordinary	54.5102
ACOT2	ACSF2	ordinary	17.1117
AKAP9	CALM2	redundant	19.5254
DBF4	PRIM1	redundant	96.0011
CHML	RAB36	ordinary	30.4629
GRB2	VAMP3	redundant	16.7331
ABCD1	PLA2G16	ordinary	52.1926
HLCS	ACACA	ordinary	30.3616
POLR2D	ATM	ordinary	32.836
RIOK3	RPS27L	ordinary	22.0874
TRPM7	CAMK2B	redundant	71.3615
SUCLG1	HADHA	ordinary	75.9106
PPFIA1	SLC1A3	ordinary	25.9398
UBB	FANCM	redundant	16.9709
BIRC2	TICAM1	redundant	32.722
PIAS2	UBE2I	redundant	32.8128
SEC24C	F8	redundant	51.7385
CLCN7	SLC4A8	ordinary	29.6045
OPLAH	SLC25A22	ordinary	22.3559
CASP6	LMNA	ordinary	27.283
EP300	VEGFA	redundant	22.2453
ATG12	ATG10	ordinary	51.5979
PLCD1	DGKG	ordinary	18.4871
CTNNB1	TCF4	ordinary	37.0738
PIK3R3	SHC1	redundant	48.1182
RANGRF	SLC9A8	ordinary	52.9544
EED	HIST1H2BD	ordinary	37.1577
PDGFRB	PDPK1	ordinary	26.4206
ISG15	KPNB1	ordinary	67.5092
PSMD11	ANAPC1	ordinary	69.9998
ARHGAP26	RHOQ	ordinary	21.9411
SLC6A8	ATP1B1	redundant	53.6645
STAT2	STAT1	ordinary	227.79
GNG11	PRKCD	ordinary	51.1913
EGF	BAG4	redundant	65.0467
SAP18	H2AFX	ordinary	55.5323
OSBP	PPM1L	ordinary	60.9287
PSMC4	TRAF2	redundant	33.3909
SLC1A1	ATP1A1	redundant	38.1732
PPP1R12B	MYH14	ordinary	134.197
SPTLC2	HDAC6	ordinary	19.5038
CAMK2G	ATP2C1	ordinary	66.2144
DGAT2	SLC27A5	redundant	61.9903
ARHGAP27	RHOJ	ordinary	51.287
ADRA2A	GNB1	redundant	34.0565
PSMC3	CUL5	redundant	41.1696
DVL1	PIK3R4	redundant	35.0839
2020-09-02	PRKAR2B	ordinary	33.3788
B3GNT4	MUC21	ordinary	136.631
CUX1	VAV2	ordinary	62.6556
NELFB	CHEK1	ordinary	78.2969
GRB2	TF	redundant	93.6796
ZFHX3	CDKN1A	ordinary	16.6029
RPS24	DIEXF	ordinary	16.6412
AP2B1	IGF2R	ordinary	46.1228
ERBB2	AKT1	ordinary	16.7657
PTPRA	HRAS	ordinary	17.1949
MCOLN3	AKAP9	redundant	24.8194
PLA2G6	GALNT2	ordinary	38.5049
PTPN22	HLA-DQB1	ordinary	45.6051
SPTBN1	TMED2	ordinary	18.6727
CBL	SYT11	redundant	23.3903
KAT5	POLR2K	ordinary	29.6457
ACOT13	SLC27A2	ordinary	27.3134
AHCYL1	GNAI1	redundant	35.0971
TRPV4	CLCA4	ordinary	113.977
TPCN2	RAB3A	redundant	26.1622
SREBF2	CYP51A1	redundant	47.6767
ATP6V0A4	UPP1	ordinary	162.803
RNF8	SUMO2	ordinary	38.6202
EXOSC3	NOL6	ordinary	62.7546
USP21	IL33	ordinary	28.4449
PSMA4	PPP2R5B	redundant	21.8768
PSMD7	GOT1	redundant	113.251
ATP1B1	KCNMB4	ordinary	20.9112
BCR	RHOC	ordinary	20.2049
GNG7	GAB1	ordinary	130.779
MCOLN3	SORBS1	ordinary	143.261
STX1A	MCOLN3	ordinary	64.3827
CACNB1	TPM3	ordinary	185.345
IRAK4	SHC1	redundant	39.5422
LCLAT1	LPIN3	ordinary	30.8076
AKAP1	LMOD1	ordinary	144.85
AP2M1	TF	ordinary	107.855
ARL2BP	CALM3	redundant	17.0363
CARM1	NPAS2	redundant	25.3718
PIP5K1B	VEGFA	redundant	41.7488
DNM1	VAMP4	redundant	26.3824
PIP5K1B	PPP2R5D	redundant	40.131
PSMC3IP	HIST2H2BE	ordinary	60.3278
COPS2	SPSB2	ordinary	18.7119
SPCS1	RPL24	ordinary	48.179
AP2A1	PTPN13	ordinary	17.2395
DIAPH2	SPC24	ordinary	48.5474
MPC1	DLD	ordinary	169.736
CDC37	GAB1	ordinary	54.5932
AKAP1	MYL9	ordinary	32.4896
STX1A	TRPC1	redundant	66.3879
AKT3	PHF20	ordinary	22.4782
PSMD5	WTIP	ordinary	25.0419
ATP1B1	SLC3A2	redundant	43.9176
KDM6B	HIST1H2AE	ordinary	21.034
NUP37	HSPA1L	ordinary	36.3807
NLK	MYC	redundant	18.6388
RBBP8	CDK7	ordinary	18.7551
CACNA1A	CACNB3	redundant	19.1956
CAMK2D	EPB41L1	ordinary	16.8831
RPIA	PRPS1	ordinary	28.4844
MAML2	HEYL	ordinary	46.0436
NUPL2	HSPA1B	ordinary	12.9592
EXOSC10	WDR75	ordinary	27.0339
PTPN22	HLA-DPA1	ordinary	90.3687
SRSF10	SRSF2	ordinary	172.266
CHRM3	GNAQ	ordinary	18.3803
DLD	GCDH	ordinary	32.1633
GNPAT	MORC2	ordinary	82.2449
BRCA1	ERCC6	redundant	49.3969
EXOSC9	IMP3	ordinary	39.3708
PSMB5	TNFRSF13C	ordinary	12.9904
GSR	GPX2	redundant	118.347
WNT3A	PPP2R5D	ordinary	22.5555
ALOX12B	GPX1	redundant	20.348
GNG11	CPSF6	ordinary	36.1795
GNB1	ERLIN2	ordinary	27.1948
ARHGAP11A	RHOD	ordinary	58.8382
RAF1	RAP1A	redundant	65.2427
GAB2	FCGR1A	ordinary	30.9342
PSMD11	AJUBA	redundant	47.9835
MORF4L2	HIST1H2AC	ordinary	15.996
LDLR	TF	ordinary	75.6331
PRKAA2	TP53	redundant	66.7722
NUP88	SNUPN	ordinary	28.3937
ERCC2	RAD51D	redundant	44.0786
SSB	POLR3H	ordinary	19.8794
PDCD1	HLA-DPB1	ordinary	190.454
SCNN1B	SLC4A7	ordinary	60.7693
TPCN1	TPM3	ordinary	147.043
ITPR2	SYT1	redundant	49.6431
CA2	ATP6V1G1	ordinary	15.8334
CUL3	DVL3	redundant	106.2
XRN1	LSM3	ordinary	13.6578
SPIDR	BLM	ordinary	44.3896
TYROBP	CNTRL	ordinary	19.0871
RPS5	EMG1	ordinary	19.4664
AHCYL1	CPLX1	ordinary	20.745
SLC35A1	ST3GAL3	ordinary	13.563
CATSPER2	DMD	ordinary	73.822
NUP205	GEMIN8	ordinary	17.658
B4GALT6	MUC4	ordinary	27.7382
NUPL2	ALYREF	ordinary	28.7498
DCUN1D5	CUL4B	ordinary	14.204
SEH1L	SNRPE	ordinary	18.4655
EGF	FGFR2	redundant	67.9248
APP	TPM4	ordinary	35.93
PSMD3	CD40	ordinary	22.1779
NMT1	ACSL4	ordinary	29.6934
RGS16	GNAI1	ordinary	41.2749
EIF1AX	RPL4	ordinary	17.566
PIP5K1A	AKT1	redundant	27.4362
GPSM2	GNAI3	redundant	64.6
SUDS3	HIST1H2BD	ordinary	26.5523
BLM	GTF2H3	ordinary	35.1524
SYNJ1	PPP2R1A	redundant	22.782
INPP5D	ARRB1	ordinary	48.2631
PIK3CB	UBA52	redundant	14.583
STX1A	CNGA1	ordinary	77.6449
ADRB2	PIP5K1B	ordinary	30.5635
CASK	VAMP2	redundant	40.3163
HLA-DPB1	LCK	ordinary	126.752
STAT3	ICAM1	ordinary	47.887
METTL3	POLR2D	ordinary	40.3165
SLC39A6	S100A8	ordinary	33.8135
B2M	CYFIP1	ordinary	16.3556
NECAP1	TF	ordinary	73.4844
MAT2B	MECOM	ordinary	56.6017
TIAM1	RHOQ	ordinary	38.2371
TGFB1	ZFHX3	critical	74.7021
ARL2	ATP6V1C1	ordinary	59.3239
EXO1	RFC3	ordinary	220.614
B3GLCT	ADAMTSL4	ordinary	31.8523
CPSF6	INPP5D	ordinary	24.2241
CDK12	FANCI	ordinary	68.0189
CALM2	MYL1	ordinary	41.647
PIK3AP1	ITK	ordinary	53.4341
PPP3CC	SFN	ordinary	37.8181
ATP1B1	CALM2	redundant	17.5247
UBA7	DDX58	ordinary	68.5863
CHCHD4	CHCHD5	ordinary	18.1493
DNAJC2	HSPA12B	ordinary	22.4546
NEFL	HRAS	redundant	18.2403
SH2D2A	BRK1	redundant	70.9186
PIK3R6	FGFR2	redundant	12.9065
PIK3C2A	ARPC4	ordinary	45.6665
COPS4	FBXO21	ordinary	33.8089
EXOSC2	NOP58	ordinary	88.6557
PSME2	AMER1	redundant	29.5074
BOP1	RRP36	ordinary	58.3661
TRPC1	ACTA2	ordinary	31.6108
CCNB1	BIRC5	redundant	213.755
ARHGEF7	RHOU	ordinary	58.783
SCN9A	FXYD6	ordinary	17.7646
ARHGAP26	RAC2	ordinary	53.4072
MTMR3	PLA2G4C	ordinary	50.0069
CDK1	SKA2	ordinary	178.269
JMJD6	HIST1H3H	ordinary	39.29
CNGB1	PPFIA1	ordinary	58.9266
TIMM17A	HSPD1	ordinary	60.3099
PLCB4	OCRL	ordinary	65.8812
MCOLN1	TNNC1	ordinary	62.3156
SEH1L	SLBP	ordinary	25.327
ADCY6	PRKACB	ordinary	57.4365
CDK5	FOXO3	ordinary	22.6456
TAF1D	HIST1H3D	ordinary	14.599
NUP37	SNRPG	ordinary	172.445
PLEKHG2	RHOH	ordinary	43.9543
ARHGAP4	RHOT2	ordinary	60.6602
DVL1	PDGFRB	redundant	29.4159
CCNB2	PPP2R1A	redundant	64.7983
ALOX12	GPX2	redundant	72.4198
NUP188	TOP2A	redundant	103.702
ARHGAP8	CDC42	ordinary	19.9842
ATP1B3	SLC6A6	redundant	31.7103
ACTN2	ITGA1	ordinary	69.9412
SLC25A6	ATP6V1C2	ordinary	45.1897
CHMP3	UBB	ordinary	16.8101
SEC11C	RPS23	ordinary	86.7576
ACADS	ECHS1	critical	121.38
PDGFB	FGFR3	redundant	24.6013
CTR9	HIST1H2BC	ordinary	26.9977
PSMA6	KLHL12	ordinary	22.2346
HRAS	CNKSR1	ordinary	13.051
EP400	CDKN1A	redundant	23.0061
GNB5	DGKH	ordinary	54.4894
SUPT4H1	TAF11	ordinary	49.6209
PIP5K1B	ARRB1	ordinary	145.615
EYA4	HIST2H2BE	ordinary	20.9161
GNB2	ITPR2	ordinary	43.3901
SLC39A7	SLC39A8	ordinary	28.716
DEGS1	COL4A3BP	redundant	25.0641
SNX9	TGOLN2	ordinary	91.5583
COPS5	FBXO41	ordinary	37.7218
ORAI1	CALM3	redundant	18.0267
ATP2B1	TNNI2	ordinary	92.8306
CAMK2G	CALM3	redundant	28.506
SCNN1A	SLC9A8	ordinary	91.3168
ACOT9	BCKDHA	ordinary	71.4491
CNTRL	INPP5D	ordinary	45.2773
ARHGEF19	RAC2	ordinary	43.5903
RAD50	H2AFX	redundant	26.113
KDR	FCGR1A	redundant	16.5293
MBOAT7	SLC27A5	redundant	29.8299
RMI1	POLR2K	ordinary	48.219
RXRA	ATP1A2	redundant	94.8575
EXT1	GPC2	ordinary	98.6486
SLC6A11	TTYH3	ordinary	70.2331
ACOT2	ACSS1	ordinary	16.691
TOMM5	HSPA9	ordinary	19.8185
HDAC8	GNPNAT1	ordinary	19.9908
MET	RAP1B	ordinary	42.9832
AKAP1	CPNE1	ordinary	49.1155
RYR3	DMD	ordinary	122.868
SLC6A6	ANO6	ordinary	14.0609
NUP62	NCBP1	ordinary	83.6753
STAM2	EPS15L1	ordinary	27.4163
COPS7A	DCAF4	ordinary	23.433
ENY2	HIST1H3D	ordinary	21.392
ASH2L	HIST1H2BC	ordinary	12.9163
MAPK14	RPS6KA5	ordinary	23.5055
NUP50	HSPA5	ordinary	23.9309
ARHGEF28	LIMK1	ordinary	50.5647
SLC39A6	S100A7	ordinary	14.5746
ANK2	TMED10	ordinary	98.8445
RHOC	LIMK1	redundant	68.8965
ARHGEF15	RHOBTB1	ordinary	72.4607
INPP5K	FCHO2	ordinary	87.2744
TRPC1	CPNE3	ordinary	13.7884
DVL3	ERLIN2	redundant	43.1059
NUP35	HNRNPC	ordinary	58.4489
NUP62	SMN1	ordinary	54.6293
ARHGAP28	RHOT1	ordinary	19.5926
PSMA2	CCNE2	redundant	25.3038
ARL6IP5	ATP1A2	redundant	154.527
CLCN7	CLCA4	ordinary	136.287
B3GAT3	AGRN	ordinary	76.6916
CBFB	IL2RA	ordinary	32.6815
SLC38A2	DARS	redundant	24.5338
NME1	AK2	redundant	39.114
PIP5K1B	MTMR2	ordinary	25.5014
FGFR1	FGFR3	ordinary	13.1717
CAMK2A	TPM1	ordinary	162.575
SLC25A28	ISCU	ordinary	39.5357
CNGB1	MYL2	ordinary	84.3966
USP8	MET	redundant	44.053
ATP1A2	SLC28A3	ordinary	109.45
CALM3	ATP1A2	redundant	105.913
PSMB7	SUFU	redundant	49.9782
ST3GAL4	NOTCH4	ordinary	83.9835
2020-09-02	TUBB	ordinary	49.3812
AHCYL2	SLC13A4	ordinary	54.7871
ASL	AIMP1	ordinary	19.9368
AKAP9	CALD1	ordinary	30.5746
SYNJ1	MTMR3	ordinary	71.5985
ARHGEF16	RHOT2	ordinary	27.6563
RPS3A	UTP14C	ordinary	43.9048
LGMN	HLA-DRA	redundant	50.6424
FGFR2	MYO18A	ordinary	53.8797
PSMD14	GTSE1	ordinary	92.9378
ARHGAP22	RHOV	ordinary	24.2551
SEC23A	CNIH3	ordinary	21.957
GNB4	RAC1	ordinary	15.546
EIF1AX	RPL23	ordinary	14.6709
GNL3	PELP1	ordinary	29.838
ACLY	ACAT2	ordinary	29.0991
ARHGEF2	RHOA	ordinary	23.6545
DVL3	PPP2R5C	redundant	35.3284
KMT2D	H2AFJ	ordinary	40.9409
ATP1B3	SLC12A7	ordinary	35.8124
PSME4	APC	redundant	45.8342
RMI2	CUL4B	redundant	64.532
P2RX7	TCAP	ordinary	71.0036
BOP1	RPS2	ordinary	71.0704
KCNIP3	SLC12A2	ordinary	74.1827
PIK3R2	CLTB	ordinary	18.8728
BRIP1	HMGN1	ordinary	78.9282
TAF5	TP53	ordinary	45.1245
ARF4	USO1	ordinary	61.2109
GRB2	INPP5A	redundant	55.8573
CCNB1	CDC16	ordinary	40.1991
VAV1	CALM1	ordinary	12.6902
GLE1	POM121	ordinary	33.6662
CALM2	ITGB5	ordinary	15.8907
PIK3R6	VAMP2	redundant	33.5821
SLC12A2	KCNC4	ordinary	79.9366
CSGALNACT2	BGN	ordinary	73.6006
CCNA1	ORC4	ordinary	14.0831
MAP3K1	IKBKB	ordinary	40.4375
PIK3R1	BAIAP2	redundant	64.945
GRB2	BAG4	redundant	30.3897
GNB2	GNAS	ordinary	27.9569
GNG2	AKT3	ordinary	35.4008
PIP5K1A	ICOS	ordinary	23.9205
KIF23	HLA-DQB2	ordinary	63.9818
PIP5K1B	FYN	redundant	31.3192
RAF1	ZC3HAV1	ordinary	52.7501
HDAC2	HIST1H2AE	ordinary	27.0566
GNAI2	PRKAR2A	ordinary	81.7842
A2M	RHOT1	ordinary	27.5528
CD79B	INPP5B	redundant	29.1281
RMI1	POLR2L	ordinary	26.1765
EGFR	BTK	redundant	18.2475
CTNNB1	HIST1H2BH	ordinary	30.0345
BARD1	TCEA1	ordinary	37.0684
ARHGEF1	RHOV	ordinary	37.4877
RPS3A	NOC4L	ordinary	34.7479
COPS7B	FBXW8	ordinary	18.0652
TRPV3	PLA2G4A	redundant	16.8271
TULP3	PRKAR2A	ordinary	83.9289
BCR	VAV3	ordinary	21.1409
ANO9	SLC6A11	ordinary	13.1496
GPT	KARS	redundant	158.525
MAPKAPK3	CBX6	ordinary	93.086
RING1	UBE2I	ordinary	51.664
GUK1	IFT122	ordinary	14.732
NUP43	AURKB	ordinary	117.636
RYR3	CAMK2D	redundant	25.5434
PLCB2	DGKE	ordinary	23.4086
ATP2B1	MYL2	ordinary	64.3508
RAB10	EXOC1	ordinary	57.0437
TPCN2	CALM1	redundant	20.5938
CACNA1A	TTN	ordinary	82.7308
PGP	AQP9	ordinary	18.3284
PDGFA	GRB2	redundant	36.7989
RANBP2	SNRPB	ordinary	52.3092
FKBP1A	NFATC1	ordinary	14.0802
MTMR9	PPP2R1B	redundant	21.5152
STAT3	TWIST1	ordinary	16.375
PSMB3	SUFU	redundant	57.4467
SLC8B1	CALM3	redundant	22.576
PIK3CB	AP2A1	ordinary	16.0237
FOXP3	IL2RA	ordinary	183.792
PDHA1	NAGS	ordinary	55.0164
NAGS	DLST	ordinary	34.993
CACNA1C	MYBPC1	ordinary	64.8347
PIP5K1C	BIN1	ordinary	49.5454
PSMC4	SPOPL	ordinary	17.2661
PCCB	MCEE	ordinary	47.3376
CALM3	CLCA4	ordinary	121.505
ARHGAP9	RHOA	ordinary	39.0122
KDM7A	MAP2K2	ordinary	26.0188
TRIP10	RAC2	ordinary	133.828
GNB5	MYO18A	ordinary	88.9305
AAAS	SNRPD3	ordinary	33.237
AKT2	GSK3A	ordinary	61.9612
RFC3	BLM	ordinary	121.344
RBM28	UTP6	ordinary	63.2786
USP2	TRAF2	redundant	51.9723
PSMD3	ANAPC16	ordinary	40.0747
BLM	FAAP100	ordinary	12.6899
SYNJ1	INPP1	redundant	22.6814
CALM1	ACTN2	redundant	50.1679
NUP214	HDAC4	ordinary	41.9184
LIG1	CCNH	ordinary	69.2889
RIN1	GDI2	ordinary	14.518
CDKN1A	ORC1	ordinary	65.5438
LYN	PLCG2	redundant	15.946
PLA2G4F	LPGAT1	ordinary	28.2205
PLA2G4A	DCTN3	ordinary	13.7405
CACFD1	SLC24A3	ordinary	16.5641
VAV3	ITK	ordinary	24.1393
CCNB1	SMC2	ordinary	101.174
FBXO30	NEDD8	ordinary	31.4992
PDGFB	CD3G	redundant	18.4762
MTMR3	PIGA	ordinary	19.3737
SRI	ATP1A2	redundant	95.4677
CHN1	RHOH	ordinary	51.5035
NEFL	ACTG2	ordinary	48.6121
DVL3	APBB1IP	ordinary	31.3217
ARF5	COPZ1	ordinary	23.6975
CACNG4	MYL1	ordinary	42.8047
PSMC1	OAZ2	ordinary	25.6341
SOS2	RHOBTB2	ordinary	13.4149
PSMB8	EGLN1	ordinary	67.2665
SOS1	PIK3AP1	ordinary	48.029
PIK3R6	MYO18A	redundant	46.7487
ELOVL1	SLC25A16	ordinary	41.0317
CACNA1C	CACNB1	ordinary	62.0313
TRPC4AP	CPNE7	ordinary	25.2909
FN1	SYK	ordinary	43.9375
INPP5D	AAK1	ordinary	18.7401
SLC8B1	ATP2B4	ordinary	22.4924
KCND3	ATP1B3	ordinary	31.8839
GRIN2D	RASGRP2	redundant	68.574
ATIC	ADSS	ordinary	31.0362
E2F1	EZH2	ordinary	154.919
TPCN2	PYGB	redundant	16.9874
PSMA1	REL	ordinary	32.0347
P3H3	COL15A1	redundant	20.559
ATP2B4	TPM3	ordinary	62.3369
IRAK1	FGF1	redundant	23.0975
PCF11	ELL3	ordinary	60.6306
SLC6A8	SLC9A9	redundant	22.5651
CDK1	HIST1H2BG	redundant	52.3219
AK2	SLC25A5	ordinary	26.5706
COPS2	FBXO6	ordinary	17.9399
IL33	CD28	ordinary	31.3643
DCTN4	HSP90AA1	ordinary	14.5592
ITCH	GLI1	redundant	22.2173
NCALD	SLC24A1	ordinary	27.9064
TPI1	GPD1L	ordinary	256.065
LPIN1	CEPT1	ordinary	139.258
TREM2	INPP5K	ordinary	33.4857
ASPH	TPM3	ordinary	52.9297
ACTN2	TLN1	ordinary	51.0643
MTOR	AKT3	ordinary	13.1059
ACOT1	ACLY	ordinary	46.0558
TPCN1	TNNI1	ordinary	144.491
ARHGEF35	RHOU	ordinary	60.3584
COPS6	COMMD2	ordinary	19.3405
ASH2L	HIST1H3H	ordinary	38.2986
PITPNM3	LPIN2	ordinary	15.6648
MCOLN1	CNGA1	ordinary	29.4382
CACNA2D3	ATP2A2	ordinary	71.8717
CACNB1	TMOD2	ordinary	55.6181
FGF1	SHC1	ordinary	36.6325
PSMD7	TAP1	redundant	31.7001
RBBP8	POLM	ordinary	17.2901
PSMC5	RPS27A	redundant	67.6824
CNGB1	SORBS1	ordinary	169.438
NCOA1	HMGCR	redundant	67.7592
CLTC	PLEKHA2	redundant	23.5187
AHCYL2	CA12	ordinary	23.5722
STIM1	SLC24A1	ordinary	28.4738
CAMK2B	HSF1	redundant	90.9756
COPS2	VHL	ordinary	16.5629
CNGB1	ACTG2	ordinary	68.1201
USP1	UBC	redundant	26.6872
DKK2	FZD2	ordinary	70.4558
SYNJ1	PLEKHA6	ordinary	80.308
SLC4A2	GABRQ	ordinary	20.3034
P3H3	COL7A1	ordinary	63.8681
FOLH1	LRRC49	ordinary	33.7607
TLR6	IRAK1	ordinary	40.4692
ST3GAL1	MUC4	ordinary	32.4241
BRIP1	RFC1	ordinary	125.79
ITPR2	VDAC2	ordinary	60.4792
CTSS	COL15A1	redundant	27.2391
TPCN2	TRIM72	ordinary	49.1655
PHKB	PYGL	ordinary	74.8381
RPS13	MPHOSPH10	ordinary	16.452
PAG1	HLA-DRA	ordinary	41.1456
HMGB1	NFKB2	redundant	33.9426
FBXL3	CUL1	ordinary	18.5861
CD79B	PRKCQ	redundant	24.4579
PTPN6	HLA-DQB1	redundant	68.7917
STON1	PLEKHA1	ordinary	29.4634
MET	PLCG1	ordinary	61.8383
ATR	FANCM	redundant	62.7376
UBE2N	TICAM1	redundant	25.4418
ERCC6	HIST1H2AE	ordinary	23.6597
DNAJC2	HSPA13	ordinary	34.0057
GALNT1	MUC16	ordinary	32.1733
RYR3	ITGA1	ordinary	47.8559
FIG4	MTMR4	ordinary	72.8568
CLCN7	ANO1	ordinary	47.1795
FNBP1L	TFRC	ordinary	50.326
NFIX	POLR3C	ordinary	150.476
PRMT5	HIST1H4H	redundant	21.9711
ORAI1	PPP3R1	ordinary	19.245
KIT	INPP5D	redundant	94.6252
BLNK	RASGRP1	redundant	74.3415
POLH	XRCC3	ordinary	53.6496
GATAD2A	EP300	ordinary	41.4389
TSC2	MTOR	ordinary	24.116
GNG10	ITPKA	ordinary	23.9278
[truncated: 57,938 more rows]

## Sheet: KICH
node1	node2	edge_type	activity
NUP153	HSPA12B	ordinary	21.4445
NUP98	CDCA8	redundant	16.4804
ATP2B2	DYSF	ordinary	46.769
SOCS1	TLR2	ordinary	23.4719
PAF1	HIST1H2BC	ordinary	15.0305
EGFR	FGFR3	redundant	90.482
NFYA	DDIT3	ordinary	58.1245
SLC7A7	ATP1A3	ordinary	70.4154
CACNA2D1	ATP2A3	ordinary	14.5464
TRPM6	PRKCD	redundant	63.7676
NR1H4	ATP1B1	redundant	61.7854
SH2D2A	CYFIP2	redundant	20.7286
INPP5K	AP2A2	redundant	18.5061
NMNAT2	NADSYN1	critical	41.1576
AHCYL1	TNNC2	ordinary	37.0044
PLAT	PDGFD	ordinary	20.0788
PIP4K2C	ERLIN2	redundant	20.6876
ATP6V1E1	ADPGK	ordinary	59.0515
CATSPERG	ANXA1	ordinary	14.3976
NOL12	HEATR1	ordinary	16.9249
ACVR2B	BMPR1A	ordinary	30.7262
GNG7	PRKCQ	ordinary	72.7241
UIMC1	HIST1H2AG	ordinary	23.5674
CCNB2	SEC13	ordinary	38.0958
STAT4	LCP1	ordinary	44.621
PSMB7	PPP2R5C	redundant	12.6052
FCGR1A	FGFR1OP	ordinary	19.845
TADA3	HIST2H2BE	ordinary	18.2301
COPS8	KLHL25	ordinary	43.1239
PIP5K1A	WASL	ordinary	27.9506
CHMP4A	UBA52	ordinary	15.706
AGO4	CDKN2A	ordinary	40.8543
GFRA1	KRAS	ordinary	28.7231
GNG11	INPP5K	ordinary	12.6468
GGT7	CAMK2B	redundant	26.5817
ATP6V1F	AK7	ordinary	80.3838
ELL	RPS27A	redundant	13.1355
MYD88	LAT2	ordinary	70.6331
PIP5K1C	GNAI3	redundant	54.7186
COPS4	WDR5	ordinary	12.7089
EYA4	RAD50	ordinary	31.7263
ADCY7	AKAP5	ordinary	157.448
POM121C	SNRPF	ordinary	34.5377
GNAI1	CACNA2D1	ordinary	36.8236
ANK3	KDELR3	ordinary	21.5913
GTF2H5	POLR2B	ordinary	19.4916
PCP2	GNB1	redundant	18.238
AP2A1	DAB2	redundant	35.6411
ARRB1	MAPK3	ordinary	51.0988
DZIP1	GLI3	redundant	95.3431
SLC25A4	GNAI1	redundant	43.3816
MCOLN1	MYL12B	ordinary	24.046
VCL	MAPK1	ordinary	45.9968
IVD	MCCC1	ordinary	31.2948
RPL38	UPF1	ordinary	13.8248
RFC5	XRCC2	ordinary	40.7744
KIF2C	HLA-DRB1	ordinary	12.8005
EXOSC6	DIEXF	ordinary	18.6082
SIRT1	TAF1B	ordinary	39.0769
SEC11A	RPL36AL	ordinary	39.9214
NIP7	UTP15	ordinary	19.4943
JUN	KDM6B	ordinary	30.4601
SRGAP3	RAC1	ordinary	19.7684
LPCAT3	ATAT1	redundant	59.991
PIK3CD	BAIAP2	redundant	36.0536
FBXO11	CUL1	ordinary	30.2549
P3H2	COL28A1	ordinary	18.107
PSMD8	ANAPC16	ordinary	34.2661
ATP6V0C	ARL2BP	ordinary	68.65
ATP6V0B	AK7	ordinary	69.2495
NRG2	PLCG2	ordinary	105.503
PSMD7	REL	redundant	31.5024
CAPZB	HSP90AA1	ordinary	16.7473
SUPT16H	CHEK1	ordinary	29.8227
PTEN	FGF7	redundant	33.106
EP300	HSPB2	ordinary	15.4889
FGF1	TXK	ordinary	69.7847
RAB3IP	RAB8A	ordinary	16.4351
ARHGAP6	RHOBTB2	ordinary	56.6425
SCNN1G	FXYD2	ordinary	104.129
POLR2H	FANCI	ordinary	15.2018
ANO6	SLC4A1	ordinary	14.8577
AGPAT4	SLC27A2	ordinary	44.0691
HIST4H4	UBE2I	ordinary	28.8994
NCOA2	AKAP9	redundant	33.3367
P2RX4	CAMK2G	redundant	27.0051
USP21	TAB1	ordinary	23.1249
IRAK1	CYFIP2	redundant	40.2669
GPS1	SOCS3	ordinary	22.6928
SUCLA2	CPT2	ordinary	15.8912
GNG5	SLC12A1	ordinary	65.022
TSC1	RRAGD	ordinary	46.1243
COPS7A	BTRC	redundant	29.4577
CCNB2	CENPU	ordinary	63.2115
PIP5K1A	RAP1B	redundant	32.2383
BRCA1	SYCP2	ordinary	29.2591
EIF5	EIF4G1	redundant	20.2454
NRG1	INPP5J	ordinary	48.235
NALCN	FXYD4	ordinary	15.5345
CHD4	HIST1H2AC	ordinary	62.08
AGFG1	ACTR3	ordinary	26.4403
ADCY9	RAPGEF3	ordinary	19.2025
PDGFB	KRAS	redundant	48.8625
RYR1	CALD1	ordinary	45.4934
CACNA2D3	NFATC1	ordinary	35.5644
RORA	NPAS2	redundant	51.0476
FURIN	PDGFA	ordinary	31.4294
CACNA2D1	TNNI1	ordinary	53.1113
ARHGEF19	RHOH	ordinary	32.4569
AGBL5	RARS	redundant	28.8971
PIK3CA	FGF2	redundant	17.5925
FAM13A	RHOQ	ordinary	21.5939
PSME2	SKP2	ordinary	17.4009
PKM	ATP6V0D2	ordinary	67.3006
ROCK1	MYH9	ordinary	29.973
MAN2B2	MANBA	critical	39.4971
ARHGEF4	RHOQ	ordinary	22.6302
INPP5J	AP2A1	ordinary	48.3994
PIK3R5	AP2A1	ordinary	17.5431
PRKAG2	LAMTOR5	ordinary	63.3986
KCNIP4	ATP1A2	ordinary	25.2642
TAGAP	RHOC	ordinary	40.0419
TNFSF13B	MAP3K14	ordinary	59.0261
CTTN	VAMP2	ordinary	23.3925
PSMC5	LTBR	ordinary	28.7388
HMGCR	ACSL4	ordinary	19.0362
AGPAT3	LPIN1	ordinary	24.615
SLC4A2	SLC12A5	ordinary	43.5524
DDX58	CASP8	ordinary	35.2911
PSMD6	CKS1B	ordinary	18.0452
RPS15A	WDR36	ordinary	20.6423
SLC35A3	MGAT4B	ordinary	61.6076
CEP152	AURKA	ordinary	130.673
IRAK3	TOLLIP	ordinary	35.8418
PRKAA1	RB1CC1	ordinary	26.1574
CALM2	FXYD4	redundant	15.6131
CDK1	H2AFZ	redundant	29.2715
UBE2V1	PRKCQ	redundant	56.9397
CDK6	TFDP1	ordinary	27.0057
SLC52A2	RFK	ordinary	49.756
DUSP7	MAPK7	ordinary	26.1823
ATP1A2	GNB2	ordinary	21.2275
PIP4K2B	GNA15	redundant	35.7248
IL1RL1	FYN	ordinary	75.8224
B3GLCT	THSD7A	ordinary	18.0093
MAPK7	MEF2A	critical	13.7304
SYNJ2	M6PR	redundant	30.7539
MAT2B	SLC25A26	redundant	12.915
EYA2	HIST1H2BC	ordinary	19.0617
PDPN	PRKCQ	ordinary	55.953
UBC	PIP5K1A	redundant	25.3164
USP21	TRAF2	redundant	36.9896
CD36	IRAK2	ordinary	17.2694
TRPM3	PPP3CA	ordinary	47.0479
FTSJ3	DDX49	ordinary	23.5944
CLIC2	RASGRF2	ordinary	39.022
CAMK2G	AKAP1	redundant	40.3481
AK9	ATP6V0E2	ordinary	31.1194
PSMB6	UBB	redundant	14.6917
UBA52	RFC1	ordinary	17.7466
ARAF	ITGA2B	redundant	24.3554
DDX21	H2AFX	redundant	19.741
MCOLN1	TLN1	ordinary	25.8895
NFIA	POLR3K	ordinary	42.4089
LIG1	AQR	ordinary	20.8451
FRS2	LCK	ordinary	25.6389
FCGR2A	PLCG1	ordinary	23.3893
ORMDL2	MORC2	ordinary	14.2059
PLCE1	PRKCD	ordinary	62.5852
SLC6A20	CAMK2G	ordinary	26.0861
GNA14	TRPC6	ordinary	19.4095
PSMC2	CDC20	ordinary	22.9187
CDK1	CDC26	ordinary	12.9777
PSMA6	MAD2L1	ordinary	38.6857
PIK3CG	CLTCL1	ordinary	15.6832
PSMA4	OAZ2	ordinary	35.7161
PSMD7	AJUBA	redundant	71.734
PSMA5	BIRC3	redundant	54.8444
KDM4A	SUMO1	ordinary	19.6621
ZMYM2	ABI2	ordinary	59.7473
STAT3	JUNB	redundant	77.487
GRB2	SYT11	redundant	54.0834
EPC1	HIST4H4	ordinary	34.6408
CACNA2D4	CPLX1	ordinary	31.3714
MYD88	ERLIN2	ordinary	23.1199
PSMB6	SMURF2	ordinary	25.2467
CPT1B	AACS	ordinary	41.0941
PIK3CD	VAMP3	redundant	27.4622
SLC4A7	CAMK2G	redundant	68.6386
ATP1A3	KCNIP1	ordinary	25.9293
ITSN2	ADRB2	ordinary	22.0321
PIK3CB	FGFR2	redundant	25.8076
AKT1	GUCY1A3	redundant	105.071
MCOLN3	VDAC3	ordinary	13.8185
ATP2B1	PPP3R1	ordinary	18.399
SUMO1	KDM4B	redundant	50.9437
XRN2	RPS15A	ordinary	34.5623
CBL	IGF2R	redundant	18.0332
FGFR1OP	STAT3	ordinary	63.9995
PSMB2	PRICKLE1	redundant	33.1698
NRG2	NCKAP1L	ordinary	53.6219
RNLS	PXDN	ordinary	24.1934
HBEGF	BRK1	redundant	59.1441
TRPV2	ATP2A2	ordinary	14.4124
EP300	HIST1H2AG	redundant	30.895
ARHGAP33	RHOT2	ordinary	37.4073
SLC25A13	MARS	ordinary	28.3275
PCOLCE	COL24A1	ordinary	20.6288
SUOX	PRDX3	ordinary	34.2041
TPCN1	TCAP	ordinary	15.1715
LDLR	LRP2	ordinary	57.8756
TRPC4AP	PYGB	redundant	67.5996
EXOSC9	WDR46	ordinary	21.3531
SLC6A13	SLC4A9	redundant	94.4415
PSENEN	DTX2	ordinary	16.7194
PSMC5	PPP2R1B	redundant	14.8314
MTA2	HIST3H2A	ordinary	60.0183
RFC2	RAD51AP1	ordinary	51.8544
VAMP2	TRPC3	redundant	39.0871
P3H3	COL5A3	ordinary	21.0164
FAM20C	FSTL3	ordinary	26.1297
DLG1	VDAC1	redundant	55.7891
NIPAL2	MMGT1	ordinary	26.0238
DNA2	FANCI	redundant	22.6328
SEL1L	IHH	ordinary	25.3863
CNGB1	ATP1B2	redundant	59.2245
GNB4	ZMYM2	ordinary	18.5452
MAPK1	FGFR2	redundant	19.2027
RBBP4	BRD1	ordinary	19.3186
PIP4K2C	PIK3R3	ordinary	20.1778
ORAI1	SORBS1	ordinary	41.548
PIP4K2B	LRP2	redundant	68.0283
CCDC8	BIRC5	ordinary	18.1779
PSMC5	NPEPPS	ordinary	13.3792
TPCN2	MYL6B	ordinary	13.734
AKT2	BRPF1	redundant	20.6012
PIK3R3	AKT2	redundant	13.0721
ADCY5	HCN2	ordinary	106.239
POLR1D	HIST1H2BN	ordinary	30.7389
NUP85	HSPA4L	ordinary	52.5934
HIST4H4	H2AFX	ordinary	12.992
PSMD12	TNFSF12	ordinary	23.5464
NME1	TTC21B	ordinary	13.352
ANK2	TMED9	ordinary	54.417
TRPM6	ATP2A1	ordinary	28.2319
GNAI1	TRPM6	ordinary	32.6526
HIST1H2BD	H2AFX	ordinary	25.1025
HPN	MST1	ordinary	31.4733
PIK3C2B	ACTR3	redundant	25.2521
XRCC5	TMEM173	ordinary	24.3905
DVL1	EPHB6	ordinary	41.4093
NUP188	CPSF4	ordinary	25.0782
FOLH1	GCLM	ordinary	14.0287
GLE1	TPR	ordinary	20.7269
NFYA	PMVK	ordinary	17.8886
CHAC2	CNDP2	critical	31.7767
SLC9A2	FXYD2	ordinary	27.5815
ATP1B1	SLC12A1	redundant	65.5771
SLC4A5	SLC4A8	ordinary	88.6279
FBXW4	CUL1	ordinary	28.2292
TAF6L	HIST1H3H	ordinary	13.4869
PPP5C	NRAS	redundant	19.2786
ORAI2	TMOD1	ordinary	35.3961
POLK	RAD50	ordinary	36.6268
DCTN5	HSP90AA1	ordinary	28.6719
GNGT2	WASF2	ordinary	23.4798
SYDE2	RAC3	ordinary	31.1911
VAMP7	SH3D19	redundant	23.6993
SLC38A9	RPS6KB1	ordinary	24.1573
PTGS2	PTGIS	redundant	48.8209
ANO1	SLC6A6	ordinary	21.9988
TYROBP	KL	ordinary	30.9234
ASB7	NEDD8	ordinary	16.3078
P2RX7	PLN	redundant	28.9598
CEACAM1	FN1	critical	18.5652
FKBP1B	VAMP2	redundant	47.3741
HAUS5	AURKA	ordinary	88.4906
CLTCL1	AGTR1	ordinary	32.1623
MMP9	CDH1	redundant	21.2034
SEC24C	SERPINA1	ordinary	74.0883
FGFR3	BRK1	ordinary	95.4532
PIP5K1C	PIK3CD	ordinary	29.4969
AK7	ATP6V0A2	ordinary	77.8781
RPS15A	EMG1	ordinary	21.2671
CA13	ATP6V1D	ordinary	44.8363
CACNA2D1	MYL6B	ordinary	28.4418
OSBPL10	SACM1L	ordinary	29.4397
IL1RAP	FCGR1A	ordinary	18.9931
MET	BCR	ordinary	55.9932
AGTPBP1	BCAT1	ordinary	33.9232
SPCS2	RPL21	ordinary	19.7756
CAMK2G	SORBS1	ordinary	35.9656
ACTR8	RAD23B	ordinary	23.8638
ST3GAL4	MUC15	ordinary	32.9594
REEP4	OR51E1	ordinary	51.4868
GNB1	ATP1A1	ordinary	30.93
TRPV4	TNNC1	ordinary	50.4939
PTPN6	HLA-DRB1	redundant	22.2601
NRG2	FCGR3A	ordinary	62.1715
IFT140	AKAP5	ordinary	199.687
GNG2	DGKI	ordinary	33.6457
CCNB2	TPR	ordinary	23.2703
ARHGAP10	CDC42	ordinary	37.4622
SEH1L	HSPA9	ordinary	40.3925
CALM3	TRPC1	redundant	29.3456
ITPR1	TMOD2	ordinary	29.4705
SPTSSA	ACLY	ordinary	22.2802
PSMA3	NUMB	ordinary	29.4457
ARFGAP3	COPE	ordinary	49.2494
MAT2B	GAMT	ordinary	28.4434
DNAL4	AP2A1	ordinary	13.883
NUP85	FIP1L1	ordinary	19.5849
FAM20C	IGFBP7	ordinary	39.8361
NUP85	KPNA5	ordinary	24.512
CACFD1	DES	ordinary	32.2088
SPCS3	RPL30	ordinary	28.3873
ATP6V1H	ABCC4	ordinary	34.2714
ABCA5	ABCA6	ordinary	42.6314
TRPC4AP	STXBP1	ordinary	26.4709
PI4K2B	CFTR	redundant	58.2389
CSF2RA	KRAS	ordinary	18.3735
TOP3A	PRPF19	ordinary	14.7246
NUP43	CPSF3	ordinary	17.7909
PIK3R5	TFRC	redundant	22.425
CACNB1	RAB3A	redundant	46.0689
PFAS	TTLL4	ordinary	32.2883
NMT2	ACSL4	ordinary	32.7643
PDGFA	LCP2	redundant	30.36
SLC25A6	WDR19	ordinary	44.2366
COMMD8	CUL5	ordinary	21.8847
ATP1B2	ARL6IP5	ordinary	47.1823
RPL39L	UPF1	ordinary	13.1148
BRAF	CLCN6	ordinary	21.0245
CNGB1	TLN1	ordinary	29.0973
PIK3R1	VAMP3	redundant	32.2124
DNAJC6	SNX9	ordinary	14.157
SEC11C	SEC61A2	ordinary	38.9617
SHB	BCAR1	ordinary	27.2561
CALM1	HRAS	redundant	17.8281
P2RX7	PPFIA1	ordinary	19.3382
ITPR2	MYL9	ordinary	52.3462
UBC	XRCC2	redundant	20.2694
CAMK2D	VCL	ordinary	46.4408
AP2S1	LRP2	redundant	64.6889
TPR	HSPA12B	ordinary	17.7608
PIK3CD	ARPC2	redundant	45.108
SLC25A6	GNAL	redundant	13.6587
ERCC6	H2AFX	ordinary	21.6207
SNW1	HES1	ordinary	67.5849
CALM3	ANXA1	ordinary	27.4505
CERS2	SLC27A5	ordinary	42.6014
PIP4K2A	CUX1	redundant	32.658
RUNX1	CAMK2D	redundant	24.9959
SLC25A4	ADCY7	ordinary	17.5421
GPS1	RBBP5	ordinary	13.2662
AAAS	WDR33	ordinary	23.5911
NEK6	NUP50	ordinary	35.3318
ORAI1	TPM1	ordinary	86.0299
SOCS2	JAK1	redundant	28.7734
INPP5D	INPP4A	redundant	35.9203
PACSIN2	EGFR	ordinary	28.2395
TPCN1	PXN	ordinary	21.3421
SH3KBP1	ARPC5	redundant	16.6421
REEP5	GNB1	ordinary	14.9189
SEC23A	TMED2	ordinary	20.0982
CAMK2D	JAK1	redundant	27.7109
POU5F1	TDGF1	ordinary	15.4946
ATP1A3	SLC22A4	ordinary	68.312
FAM20A	LAMC1	ordinary	23.2671
MED27	LPL	ordinary	34.082
ITPR2	PPP3R1	ordinary	31.1778
AK3	NME4	critical	28.5572
LPCAT1	MORC2	redundant	24.117
PSMB2	TNFRSF1B	ordinary	19.4167
RAD50	FEN1	ordinary	34.1914
TP53	HIRA	ordinary	13.4244
GNB1	ATP1B3	ordinary	26.0135
IKBKB	REL	critical	13.7139
DCTN3	AURKA	ordinary	83.6191
INPP5K	ADRB2	redundant	28.9172
LIPT1	PDHX	redundant	43.9999
SYNJ1	PLA2G12A	redundant	33.7288
CD79B	TRPC6	redundant	30.8197
HADHB	ACAA2	ordinary	19.4506
ATP2B1	TNNC2	ordinary	36.5826
NUP205	FIP1L1	ordinary	38.9665
CLCN4	ANO10	ordinary	37.7726
RBBP8	RPS27A	redundant	15.0433
GMPS	GLUL	redundant	32.3099
MPHOSPH6	UTP4	ordinary	42.0398
PIP4K2C	FGF1	redundant	72.2301
VAV2	PRKCA	ordinary	18.295
TRPV6	RASGRP2	redundant	49.8025
VEGFA	AXL	redundant	21.2886
FCGR2A	VAV2	ordinary	21.3654
DENND1C	RAB8A	ordinary	22.1426
P3H3	COL13A1	ordinary	19.8351
NCOA1	ATP1B2	redundant	37.194
NUP62	HSPA4	ordinary	20.3329
GRIK5	PLN	redundant	26.8584
PSMD1	PPP2R5E	redundant	18.6828
EPN1	ARRB1	ordinary	57.818
VAV2	RAC2	ordinary	16.1033
NUP58	HSPA4	ordinary	20.5028
EXOSC10	RPS2	redundant	34.0082
PPP1R12A	MYH9	ordinary	29.4161
STIM1	ATP2C2	ordinary	77.9805
ATF4	HSPA5	ordinary	18.9662
SEC11A	RPL23A	ordinary	23.1667
PIP5K1B	PIK3AP1	ordinary	34.8745
ARHGEF9	SLC12A1	ordinary	61.1931
SLC3A1	SLC3A2	ordinary	46.5697
LCK	CDC42	redundant	51.7183
PDGFA	PDGFRB	ordinary	47.3115
CCNA2	ORC2	ordinary	27.5452
AKAP9	TCAP	ordinary	21.0073
VEGFA	FYN	redundant	26.271
TRPC6	VDAC1	redundant	44.6836
PDGFRA	PLCG1	ordinary	47.5422
H2AFX	HIST1H3H	ordinary	20.1232
COPS6	SOCS3	ordinary	16.7949
DCTN1	HSP90AB1	ordinary	19.9074
KITLG	SYK	redundant	14.8034
NRG1	FCGR3A	ordinary	16.2256
PIK3CG	ITK	redundant	27.9921
AK9	ADCY4	ordinary	39.9202
PIK3CB	REPS1	ordinary	26.3303
CTSV	HLA-DQA1	redundant	34.386
PDGFA	FGFR4	redundant	70.2739
CBL	EPS15	redundant	15.2338
SLC6A2	NEFL	redundant	21.6282
FBP1	PFKFB2	ordinary	57.4694
SLC4A7	RUNX1	redundant	61.4365
ATP1A1	ABCC9	ordinary	44.0398
PSMC4	ANAPC15	ordinary	18.1864
TSC2	LAMTOR3	ordinary	34.1427
TREM2	TXK	ordinary	26.7747
HIST1H2BD	NCAPD3	ordinary	29.5033
ASNA1	SEC61A1	ordinary	44.6501
ATP1A1	GNG5	ordinary	24.0263
EXOSC5	WDR46	ordinary	15.0856
ASXL1	HIST3H2A	ordinary	72.4847
DNA2	UBA52	redundant	16.646
CPT1A	ACSS2	ordinary	13.2622
ASIC1	SLC9A6	ordinary	18.4402
ELL	XAB2	ordinary	24.0045
GALNT18	MUC20	ordinary	128.369
ITPR2	PLA2G4A	redundant	31.6398
RBBP4	MEAF6	ordinary	61.2777
ARPC5	WNT5A	ordinary	20.155
FGF2	TEC	ordinary	33.707
RAC2	RHOB	ordinary	68.0357
NUP107	GEMIN4	ordinary	15.5824
PSME1	CKS1B	ordinary	18.7048
INPPL1	SLC2A8	redundant	78.8236
SUPT5H	NELFE	redundant	15.6835
SLC5A1	FXYD4	redundant	13.7474
COPS2	KEAP1	redundant	19.7286
GABPB1	GABPA	ordinary	15.4968
UBA6	UBC	ordinary	55.5662
CACNB2	ACTA2	ordinary	36.9196
GAB2	PLCG1	ordinary	64.7845
ITPR1	ITGB5	ordinary	24.2481
ARHGAP11B	RHOV	ordinary	13.1298
H2AFZ	KLK3	ordinary	114.709
SH3GL1	INPP4A	ordinary	35.635
ACAT2	HMGCS1	critical	36.3897
PIK3CB	EPS15	redundant	24.5002
AHCYL2	CAMK2B	redundant	90.945
BARD1	MAD2L2	ordinary	33.6355
SUPT4H1	TAF6	ordinary	24.0828
CLOCK	PER2	redundant	23.4113
ARHGEF3	RHOQ	ordinary	21.2082
CSK	CD4	ordinary	34.5604
USP2	RNF31	ordinary	34.8812
FXYD4	UNC80	ordinary	33.4052
ATP1A1	KCNQ3	ordinary	16.518
RAD50	XRCC6	redundant	24.8765
CATSPER2	GNAI2	redundant	28.8996
NSMCE1	SUMO1	ordinary	17.7279
NUP155	HNRNPC	ordinary	53.3918
CACNA2D1	RASGRF2	ordinary	26.8128
GNAI2	CACNB3	redundant	18.2909
CDK1	MAD2L1	ordinary	49.0715
CA2	PAICS	redundant	24.5177
CD79B	CALM3	redundant	56.7689
PI4K2B	AGTR1	redundant	19.3396
PTPN3	SH3GL1	ordinary	19.887
DAB2	EGFR	ordinary	33.7718
WNT5A	PIP5K1A	ordinary	34.5942
MAT2A	PRMT3	ordinary	63.7062
TOP3A	LIG3	ordinary	21.771
CHML	RAB3A	redundant	40.6855
ATR	CCAR2	ordinary	20.7692
SLC22A4	ATP1A3	ordinary	68.312
GRIK5	SLC24A2	ordinary	21.5584
GPS2	HIST1H2BD	ordinary	17.3617
NEURL1	UBB	redundant	54.4532
NEFL	CPLX1	ordinary	33.3604
SLC7A11	SLC1A3	ordinary	47.4551
PPARA	ACSL1	redundant	15.9474
NRG2	NRAS	ordinary	66.7544
SLC3A2	CAMK2G	redundant	61.3956
PPP2CB	ARAF	ordinary	21.5827
PDGFA	KL	redundant	45.5919
BARD1	CHEK1	redundant	36.0281
TSC2	MLST8	ordinary	39.2384
SLC12A2	KCNK1	ordinary	22.6893
IRAK1	FYN	redundant	34.9925
FANCA	FANCM	ordinary	28.1718
PPA1	PYGB	ordinary	47.1565
TBP	TP53	ordinary	19.2795
POLD4	RPA3	ordinary	38.1753
RANBP2	DDX20	ordinary	19.6273
RRP8	H2AFJ	ordinary	32.7699
EP300	ANGPTL4	redundant	19.3196
PSMC2	KLHL12	ordinary	23.077
FGFR4	RAC1	ordinary	53.5603
XIAP	TLE1	ordinary	32.3479
FAM20C	SCG3	ordinary	45.8147
COPS7B	FBXL7	redundant	13.6978
ARID4A	HIST1H2BD	ordinary	15.5781
RNF40	UBE2A	ordinary	18.8822
COPS7A	DCUN1D1	ordinary	36.462
PDE1C	AK2	ordinary	48.7847
XRN1	LSM5	ordinary	16.215
AP2S1	VAMP2	redundant	25.5953
TALDO1	PFKFB2	ordinary	28.8701
ATP1A1	SLC22A15	ordinary	41.4735
PSMD7	FZR1	redundant	38.1296
PSMB9	CUL3	ordinary	13.6941
GNG2	ITPR1	ordinary	23.6462
PTPN11	KL	redundant	36.1425
C1D	RRP7A	ordinary	19.7987
TACO1	CYCS	ordinary	48.1843
UIMC1	BARD1	ordinary	14.6874
PIP4K2C	RAP1A	redundant	22.6353
PDZD11	ATP1B3	redundant	36.5963
RYR3	SLC24A1	ordinary	13.832
INHBB	ACVR1C	ordinary	40.4571
EXOSC4	UTP14C	ordinary	15.0864
MMP7	LAMA3	ordinary	22.2094
GTF2F1	MDC1	ordinary	26.5688
STON1	PIP5K1C	ordinary	84.5448
ARHGAP35	RASA1	ordinary	39.3836
ATG7	MAP2K2	ordinary	31.0099
ARRB2	TGOLN2	ordinary	50.7707
CHD9	TRIB3	ordinary	27.7588
CACNA1D	TCAP	ordinary	33.5221
CAMK2G	NEB	ordinary	59.151
STON2	PTPN13	ordinary	37.6901
SLC25A16	DLST	ordinary	14.5975
CEP250	AURKA	ordinary	95.478
ASB13	UBE2F	ordinary	32.8596
RYR3	MYL12A	redundant	23.9665
CD4	PLEKHA2	ordinary	55.9539
CBL	AGTR1	redundant	25.0086
ARL2BP	ATP6V1A	ordinary	34.9205
ITPR2	TNNC2	ordinary	52.902
CALM1	ATP1A1	redundant	24.8385
CLIC2	ACTA2	ordinary	36.8491
PPIP5K1	IP6K3	critical	55.8047
CPSF6	PLCG2	ordinary	59.5805
PLCG2	RAC1	ordinary	56.0729
SRSF10	YBX1	ordinary	50.7927
CEP78	AJUBA	ordinary	74.6556
DNAL4	NGF	redundant	16.9548
B4GALT7	SDC3	ordinary	38.9476
BLM	EP300	redundant	15.223
MAP3K11	NRAS	ordinary	18.6501
SPCS2	RPL12	ordinary	17.71
ABCA2	LCAT	ordinary	24.7941
SPTBN1	YKT6	ordinary	52.5968
HSP90AA1	AURKA	redundant	91.1314
PSME1	OAZ2	ordinary	35.5316
PLD1	PITPNM2	ordinary	20.3851
TRPC4AP	CACNB3	redundant	31.2411
SYDE2	RHOH	ordinary	27.7116
NUP214	SNRPF	ordinary	15.5903
PIP5K1A	GNG12	ordinary	24.8889
PDZD11	FXYD6	redundant	34.8184
GNAI3	PDE4C	ordinary	79.3166
TRPC4AP	GNAI2	redundant	31.9654
CDK11B	CEP164	ordinary	15.5556
MAP3K7	MAP2K3	ordinary	26.3557
SH3GL1	VAMP3	ordinary	24.2971
RMI2	POLR2J	ordinary	58.2338
DYNLL1	RAB8A	ordinary	15.0042
CLTCL1	VAMP3	ordinary	35.3937
PSMF1	TNFRSF12A	ordinary	13.8444
HIST1H2AC	GP1BA	ordinary	61.7455
ITSN2	ARPC1A	ordinary	42.7943
P2RX4	SLC24A2	ordinary	24.1307
GSK3B	POLR2H	ordinary	23.632
PIP5K1C	SH3KBP1	redundant	27.4312
ATP1B3	KCNIP1	ordinary	14.3178
PDGFA	FGF2	redundant	26.259
FXYD6	CAMK2D	redundant	23.4595
INPP5K	PIK3CD	ordinary	18.1838
IRAK4	WASF2	redundant	34.9321
CACNB2	GRIK5	ordinary	20.0432
ARHGAP12	RHOT2	ordinary	68.3358
ORMDL3	ACLY	ordinary	29.4985
AK8	WDR35	ordinary	55.9726
PIK3CD	FGF9	redundant	23.8969
SLC12A5	SLC6A4	ordinary	46.6625
NRG2	ERBB2	ordinary	59.937
NRG1	BCR	ordinary	23.1861
RAMP3	GNAS	ordinary	61.0442
PLD4	OCRL	redundant	27.2389
DDB1	UBE2M	ordinary	53.7488
NAGS	PDHA1	ordinary	20.139
CTSA	GLB1	redundant	39.6281
CACNB3	SORBS3	ordinary	23.6046
ASIC1	ATP1A1	ordinary	32.7295
APBA1	SYN2	ordinary	21.0472
PLA2G6	CAPZA1	ordinary	17.656
ACSS2	GNPNAT1	ordinary	20.8919
ITPR1	CNGB1	ordinary	42.4842
GNB5	WASF2	redundant	22.1788
PSMA4	PPP2R5E	redundant	15.8499
RNF111	GTF2H5	ordinary	18.6001
ARHGEF16	RHOB	ordinary	70.3204
SYNJ2	EPS15	redundant	32.7013
TGFBR1	SMAD3	ordinary	18.3426
CACNB3	MYL6B	ordinary	22.2926
PIK3CA	NECAP2	ordinary	14.0173
PIAS1	SP3	ordinary	22.2656
SRC	NRG2	ordinary	55.8981
ATP1B3	KCNJ15	ordinary	31.3847
ARHGEF15	RHOG	ordinary	18.7887
CACNB1	PYGL	redundant	42.1617
NECAP1	INPP4B	ordinary	26.4046
CACNB3	SLC24A3	ordinary	16.2689
CTSS	TLR7	redundant	28.6839
GNG5	CACNA2D2	ordinary	14.4848
CALM3	TRPV4	ordinary	26.2082
ARHGEF6	RHOH	ordinary	28.6847
SRC	FGF1	redundant	63.8284
PSMD8	BUB1B	ordinary	23.9559
CDC42	PPP2R5D	redundant	32.1192
CUX1	LCP2	ordinary	35.8257
AKR1B1	SORD	ordinary	69.8097
SEC11C	RPS7	ordinary	23.1345
GPD1L	GPAT4	ordinary	72.3978
RAI1	CLOCK	ordinary	26.8964
ATP1A1	SLC5A6	ordinary	17.8051
FXYD4	TRPM4	ordinary	24.0557
GLCE	GPC6	ordinary	14.6029
PSMD9	ANAPC7	ordinary	15.1164
ATP6V1D	DTYMK	ordinary	49.3995
PRDX6	GSR	ordinary	16.6901
CBL	WNT5A	redundant	27.2695
CPSF6	KL	ordinary	25.6521
GNPAT	ACLY	ordinary	29.423
ARPC2	FZD4	ordinary	30.5849
SLC9A2	DLG4	ordinary	30.0279
ADRB2	MYO10	ordinary	80.624
CAD	VAMP2	redundant	13.7686
PIK3R5	FGF1	redundant	70.0885
CAMK2D	ATP1A1	redundant	30.4511
TRPM7	RASGRF2	ordinary	25.7944
PSMC3	CDC16	ordinary	14.2288
DNAJB6	HSPA12B	ordinary	18.7732
CPLX1	RAB3A	redundant	68.1453
DIAPH2	DSN1	ordinary	19.136
PSMD10	NUMB	ordinary	24.2858
GCLM	GGCT	critical	15.2729
PSMC5	SPOP	ordinary	47.3261
ATM	GTF2H3	ordinary	16.0896
BRAF	MPRIP	ordinary	22.3986
RFC4	PALB2	ordinary	21.4429
CREBBP	GRHL1	ordinary	17.1553
CERS6	ATAT1	ordinary	22.9768
ARFGAP1	KDELR2	ordinary	46.0418
CBLB	PRKCQ	redundant	53.7699
POLR2C	NELFE	ordinary	15.8133
PSME4	CUL5	redundant	12.882
PIK3CA	TRIP10	ordinary	15.9312
NCL	NOL6	ordinary	19.556
CAMK2B	GNAI1	redundant	57.2843
B3GAT1	CSPG5	ordinary	24.9771
ARHGAP19	RAC2	ordinary	25.4638
NUP107	HSPA5	ordinary	15.4914
CALM3	ATP2C2	ordinary	32.312
AKAP9	RIMS1	ordinary	33.9253
NIP7	NOL6	ordinary	21.2442
PPAT	SLC3A2	redundant	36.4732
SUCLG1	DLD	ordinary	30.0975
RHNO1	RPA2	ordinary	64.7807
MND1	RPA1	ordinary	50.0644
BCR	RHOBTB2	ordinary	27.0654
SLC22A4	SLC9A6	ordinary	49.2061
CTSA	HLA-DPB1	redundant	26.9982
WNT5A	DVL2	ordinary	14.6024
GRB2	FGF1	redundant	69.9112
ARHGAP11B	CDC42	ordinary	37.3073
AGO2	NOTCH2	ordinary	33.202
RPS26	UPF1	ordinary	17.5106
CACNA2D3	TPM3	ordinary	35.1877
ARHGEF18	RHOBTB2	ordinary	13.3401
POLD4	TOP3A	ordinary	34.2217
SRSF10	HNRNPA0	ordinary	17.806
CACNB3	TMOD1	ordinary	14.7501
CACNB3	ATP2A3	ordinary	18.98
PI4K2B	VAMP3	redundant	21.6754
PMPCA	HSPA9	ordinary	52.1626
AKAP1	DMD	ordinary	16.5609
SLC12A3	SLC9A6	redundant	64.5247
SBF2	PPP2R5A	ordinary	36.0135
FGF1	CYFIP1	ordinary	63.8305
TREM2	CUX1	ordinary	56.803
NRAS	VCL	ordinary	57.0309
BCR	FGFR2	ordinary	39.1404
ORAI1	NEFL	redundant	35.7668
GNB1	ITPKA	ordinary	93.0006
ADCY6	PDE11A	ordinary	21.1283
PDZD11	SLC4A5	redundant	84.585
ALG10	STT3A	ordinary	25.3491
ATP1B2	SLC38A3	ordinary	40.9429
CAMK2D	RIMS1	ordinary	41.7342
CSF2RA	AKT1	ordinary	40.3932
EGF	ERBB4	redundant	22.2519
RACGAP1	RHOA	ordinary	32.7758
PSMC5	GSK3B	redundant	33.505
GNA11	DAGLB	ordinary	52.0008
SLC24A3	ATP2B4	ordinary	13.6378
TRPM3	GRIN2A	redundant	26.7756
SAP30	H3F3B	ordinary	91.6408
KAT2A	TBP	ordinary	15.7797
TRPV6	SORBS3	ordinary	27.1561
CCND3	E2F3	redundant	51.4933
FGF2	CD247	ordinary	12.6003
CAMK2B	TMOD1	ordinary	32.3699
POLE3	WRN	ordinary	23.5069
INPP5D	NECAP2	ordinary	24.3861
DNAL4	SH3GL2	ordinary	14.1929
ARRB2	VAMP7	ordinary	47.7437
ERBB2	TRIM24	ordinary	12.597
SUZ12	H2AFV	ordinary	14.3047
ARHGAP44	RHOA	ordinary	16.5016
TACR1	PLEKHA2	ordinary	71.011
ST6GALNAC3	MUC4	ordinary	83.9663
CACNB3	VDAC1	redundant	56.3429
LYN	LCP2	redundant	30.4465
CHN2	RHOQ	ordinary	34.913
APP	PPP3CA	ordinary	47.7743
RIOK3	RPS5	ordinary	12.9733
NCOA2	HMGCR	redundant	23.7189
ESPL1	CENPP	ordinary	24.2747
PSMD5	TNFRSF12A	ordinary	13.7662
RNF4	UIMC1	ordinary	18.168
GNAI1	NCALD	ordinary	56.4713
SEC11C	RPL12	ordinary	23.1914
CYLD	TAB2	ordinary	21.2362
CRTAP	COL13A1	ordinary	27.858
PIP5K1B	BTK	redundant	13.4415
ATP1A1	HCN3	ordinary	17.2817
FAR2	ACAA1	ordinary	14.3017
ATP6V0E2	ABCC4	ordinary	22.6149
COPS7A	ASB16	ordinary	74.4384
KIFAP3	ACTR1A	ordinary	14.9725
HIST1H2BD	HIST4H4	ordinary	17.5157
PIK3CD	CYFIP2	redundant	22.8361
PIP5K1A	REPS2	ordinary	87.1035
CACNA1D	CD209	ordinary	21.0997
PSME3	AJUBA	redundant	56.1943
DAB2	ARPC3	ordinary	43.3263
EZH2	H3F3B	ordinary	94.7475
DDAH1	ASS1	ordinary	142.02
CAMK2G	MDM2	redundant	27.7894
FXYD6	SLC1A2	ordinary	37.8896
FAM20C	IL6	redundant	14.6573
PIP5K1C	PDGFRB	redundant	27.6137
TPR	HSPA4L	ordinary	44.6497
RAP1GAP	RAP1A	ordinary	16.1094
GNA14	DGKI	ordinary	44.0365
FGFR4	FCGR2A	ordinary	54.2746
STIM1	ANXA1	ordinary	73.2149
ARHGAP17	RHOF	ordinary	19.4994
SLC8B1	GRIK3	ordinary	27.126
AGPAT1	LPIN3	ordinary	26.2565
ALS2	GDI2	ordinary	21.4859
LAMTOR1	AIMP1	ordinary	16.424
PRKAB2	RRAGD	ordinary	37.2748
DCAF6	CUL4B	ordinary	30.4965
NDC1	SNUPN	ordinary	12.9082
ATP1B1	KCNIP1	ordinary	23.6264
AK8	ATP6V1D	ordinary	73.1079
UBE2D1	SMAD3	redundant	19.7662
CAMK2B	ATP1A2	redundant	42.5587
SLC4A8	BEST1	ordinary	48.8753
AAAS	RAN	redundant	24.7474
POLR2J	NELFE	ordinary	38.6106
NAA35	ATAT1	ordinary	26.6312
DVL1	PPP2R5E	redundant	24.9553
TRPV6	DLG4	redundant	16.9335
FGFR4	CYFIP2	ordinary	66.8068
AKAP1	NFATC1	ordinary	18.536
P2RX7	PPP3CA	ordinary	39.4227
PIP5K1C	FYN	redundant	35.3594
PTPN11	BAG4	redundant	18.0441
ATP6V1C1	PYGL	ordinary	12.594
TFDP1	SUZ12	ordinary	32.7057
AP2A1	ROR2	critical	17.5794
AGBL3	VAMP2	redundant	66.8284
TGOLN2	PIP5K1B	ordinary	14.5893
EXOSC8	DDX49	ordinary	17.0453
NME1	ATP6V1A	ordinary	34.255
GNAI2	ITPKA	redundant	88.5251
AK8	ATP6V0B	ordinary	49.8263
SYNJ2	CD4	redundant	35.6034
TRIO	RHOQ	ordinary	15.2421
EPS15L1	ARPC5	ordinary	78.9156
PIP5K1C	CBLB	ordinary	28.2704
MPC2	PDHA1	ordinary	45.9324
KAT5	CHEK1	redundant	17.6588
PIP5K1A	NTN1	ordinary	122.378
CHM	RAB1B	redundant	19.5929
DNA2	FEN1	ordinary	25.553
PEBP1	TRIM24	redundant	34.2003
SPRED3	HRAS	redundant	12.984
CHCHD4	CMC2	ordinary	32.087
POLR2D	MDC1	ordinary	33.0461
AAK1	SLC2A8	ordinary	30.7835
CLTB	TACR1	ordinary	25.9551
INPP5D	GRB2	redundant	13.4102
PIK3C2B	EPS15	redundant	26.663
CACNB2	KNG1	redundant	41.6186
ST3GAL6	SLC35A1	ordinary	43.1122
PSMC1	BUB3	ordinary	21.5018
TRPC4AP	MYH11	ordinary	41.5749
SLC8A1	ATP1A2	redundant	18.6924
CACNA1C	CPLX1	ordinary	35.1084
ACTR2	IGF2R	ordinary	22.6519
ACOT2	ACAT1	ordinary	26.5449
PSMA3	PPP2R5E	redundant	31.7726
EIF5	EIF4E	redundant	32.1862
CACNA1D	ACTA2	ordinary	39.0966
ARPC1A	TFRC	ordinary	62.0319
SLC38A2	ASNS	redundant	54.7266
EXOSC2	UTP3	ordinary	23.7914
ARPC1A	IGF2R	ordinary	45.7726
DENND1B	RAB35	ordinary	35.8166
PSMA7	WTIP	ordinary	50.6493
WRN	PARP1	ordinary	27.5659
PPP1CB	PER1	redundant	12.8264
STAT4	TALDO1	redundant	12.8864
NUP107	PHAX	ordinary	14.3363
CCNB2	PPP2R5B	redundant	22.9303
PSMB6	RPS27A	redundant	18.7744
C1QC	C2	ordinary	80.8197
SLC23A2	SLC4A5	ordinary	59.5065
CATSPERG	MYL5	ordinary	15.3601
ARHGAP18	CDC42	ordinary	34.808
IRS1	FGF2	ordinary	14.5115
2020-09-02	HAUS7	ordinary	59.8052
PSMA6	NPEPPS	ordinary	12.6597
LGMN	HLA-DRB1	redundant	52.4902
SPCS1	SSR1	ordinary	19.7416
HDAC2	H2AFJ	ordinary	39.7687
FXYD6	SRI	ordinary	14.3162
GABPA	POLG2	ordinary	25.3638
PSME2	GLI3	redundant	20.2014
FXYD4	CALM3	redundant	35.8062
CD79B	DAPP1	ordinary	39.8338
GSS	GSTM3	ordinary	34.8028
LIAS	MARS2	critical	30.7787
SKP1	AURKA	ordinary	76.5649
FGF2	LCK	ordinary	33.5792
FGFR1	INPP5K	ordinary	20.4676
CAMK2D	NFATC3	ordinary	22.9903
ZMYM2	BAIAP2	ordinary	29.3739
SRI	LMOD1	ordinary	46.8081
BLM	FAAP24	ordinary	26.4363
RAB3GAP1	BICD2	ordinary	14.3936
ORAI1	PPFIA1	ordinary	46.8166
ARFGAP1	RAB1A	redundant	41.8906
PYGO1	H2AFZ	ordinary	14.936
CCNB2	CENPL	ordinary	42.1562
LAMA2	HGF	ordinary	14.914
ATP1A1	ASIC2	ordinary	16.0047
ATP2B1	TLN1	ordinary	17.7127
GGT6	NCALD	ordinary	27.1896
ACLY	FASN	redundant	41.7564
DHCR24	SCAP	ordinary	22.6873
CUX1	RHOA	ordinary	37.6921
TNFAIP3	RNF31	ordinary	28.7512
SLC4A8	SLC4A9	redundant	32.4774
KITLG	FGF7	redundant	22.483
IMPA1	MIOX	ordinary	76.2777
MTMR3	PITPNM3	ordinary	18.2038
TRAF6	NCKAP1	redundant	15.2114
ARHGEF10L	RHOB	ordinary	71.9695
SPCS1	SEC61B	ordinary	24.7908
PSME4	TRAF2	redundant	33.7643
EED	H3F3A	ordinary	50.9167
USP1	FANCM	redundant	34.1958
BRCA1	UBE2I	redundant	29.4446
GSK3B	TAF1A	redundant	33.4112
CALM1	ATP2B2	ordinary	51.3545
FAM13B	RHOB	ordinary	68.6813
TRAPPC13	RAB1B	ordinary	21.2422
ATP1A3	CNGA1	ordinary	24.4904
CAPN1	CDH1	ordinary	31.0732
SLC6A2	ATP1A3	redundant	41.9426
PPARG	PCK1	ordinary	38.3832
TRPC1	PXN	ordinary	20.5236
PIP5K1A	WASF3	redundant	26.7442
SLC24A3	CAMK2B	redundant	33.9527
ASPH	SLC24A2	ordinary	19.21
PIK3CA	PACSIN3	ordinary	27.2461
BOP1	UTP3	ordinary	38.6295
KSR2	MAP2K1	ordinary	54.3968
HADHB	CS	ordinary	65.0773
ATP1A2	SLC6A2	ordinary	35.6686
PSMC3	BIRC3	redundant	31.016
PRKCE	SHC1	ordinary	21.0857
PSMA5	FBXL7	redundant	48.7664
MCRS1	COPS2	redundant	19.9512
ITPR1	RASGRF2	ordinary	46.9212
PSME3	LTB	ordinary	17.8075
SUMF2	ARSJ	ordinary	63.2087
PSMA3	OAZ1	ordinary	47.7554
EXOSC6	NOP14	ordinary	23.1712
FAM20C	SDC2	redundant	23.0968
MOV10	NOTCH4	ordinary	13.7458
PAFAH1B1	DYNC1H1	ordinary	21.4419
SULT1C2	BPNT1	ordinary	82.8498
CPT1A	ACSL6	ordinary	20.6968
RPS11	RRP7A	ordinary	15.3168
RAB3A	SLC1A3	ordinary	47.1958
ALG3	ALG9	ordinary	26.4952
ELOVL7	HSD17B12	ordinary	43.9946
RABGGTB	RAB27B	redundant	34.1225
MMP15	NID1	critical	24.3691
PCP2	GNG5	ordinary	13.7831
FGFR3	FCGR2A	ordinary	91.1388
RPS13	TBL3	ordinary	28.9577
BARD1	MNAT1	ordinary	23.5966
PRKAA2	ULK1	redundant	48.0554
CAMK2G	GNAI1	redundant	57.5833
AGPAT5	LPIN1	redundant	41.8624
ARRB1	VAMP2	ordinary	62.9531
SLC24A2	SLC4A4	redundant	24.5128
DNAJB1	HSPA2	ordinary	92.1289
CEL	LCAT	redundant	14.1704
PIP5K1A	PIK3AP1	ordinary	50.9061
RUNX3	TEAD4	ordinary	13.4876
PSMD13	SPOPL	ordinary	13.4016
ACOT1	AACS	ordinary	18.6541
MYO9B	RAC1	ordinary	17.2058
PLCD4	DGAT2	ordinary	47.7567
GNAI1	STIM1	ordinary	104.533
SRGAP2	RHOG	ordinary	38.5742
CATSPER2	SLC8B1	ordinary	20.3598
KCNN3	ATP1A3	ordinary	22.4266
TRPV6	PRKCZ	redundant	19.9118
PPP1CB	CRY1	redundant	45.5199
GNG2	FGFR3	ordinary	94.2146
CALM3	PDE4A	ordinary	41.0355
BRCA1	POLH	ordinary	16.9926
GAB2	LCK	ordinary	87.3281
RPS27A	INPP4B	redundant	28.5939
DMAP1	HIST3H2A	ordinary	50.9841
ITPR2	PRKCZ	redundant	32.6033
PSMC4	CUL1	redundant	24.2301
NEDD8	UBE2M	ordinary	48.9845
TNKS2	AXIN1	ordinary	24.5095
PIP5K1A	PLCE1	ordinary	22.0008
SLC4A8	SLC6A13	redundant	124.656
MAP2K2	KDM7A	ordinary	26.5922
MYD88	FGFR4	ordinary	71.5888
COASY	ACSL4	ordinary	25.6363
RYR3	PPFIA3	ordinary	13.6385
SLC3A2	FXYD2	redundant	38.3404
VPS4A	PPIA	redundant	25.8158
PIK3CA	INPP4B	redundant	25.5137
HGF	TEC	ordinary	37.9426
PRMT5	H2AFX	redundant	18.3506
NUP85	GEMIN2	ordinary	37.9337
ATP1A1	GNB2	ordinary	20.2216
SLC6A20	ATP1A3	ordinary	22.0301
CACNB3	TRPM3	ordinary	18.6961
ARHGEF35	RHOJ	ordinary	20.2217
PSMD7	CDC20	ordinary	30.7045
CACNA2D1	ATP2C1	ordinary	16.7925
PSMC5	PPP2CA	redundant	17.9695
CAMK2D	IFNGR2	ordinary	17.3989
EXOSC8	EMG1	ordinary	15.1928
CFB	C5	ordinary	95.2189
CCNB1	AHCTF1	ordinary	17.3731
PRKAG2	LAMTOR1	ordinary	43.9948
RHOB	MYH11	ordinary	92.6648
FOLH1	TTLL7	ordinary	44.1286
FGFR3	ITK	ordinary	91.8547
CNDP2	TTLL3	ordinary	25.3599
CTSC	HLA-DRA	ordinary	15.4493
PPP2R1A	MARK3	ordinary	17.3128
RBX1	HIF3A	ordinary	48.0271
TRPC6	ATP2A2	ordinary	13.3059
ITPR2	MYH11	ordinary	51.266
CAMK2D	ACTG2	ordinary	17.5123
FGF2	INPPL1	ordinary	62.566
PIP4K2C	PIK3C3	ordinary	14.6031
PIP4K2B	TEC	redundant	41.7391
STON2	ARPC4	ordinary	17.3043
GNAI2	STIM1	ordinary	85.3876
GLA	GLB1	ordinary	24.9307
ITPR3	CPLX1	ordinary	29.8157
AK7	GNAL	redundant	51.7578
MAP2K4	MAPK8	redundant	21.9378
PIP5K1B	MTMR1	ordinary	43.2066
GCAT	GARS	ordinary	33.7168
CACNB2	STX1A	ordinary	23.202
AKT1	RPTOR	ordinary	55.9415
HSP90AA1	BAG4	redundant	16.9814
HSP90AA1	TDRKH	redundant	23.3098
GUCY1A3	PDE6G	ordinary	70.02
SKIV2L2	DIEXF	ordinary	25.7474
SETD1A	ITGA2B	ordinary	24.2684
COPS4	DCAF16	ordinary	53.6565
BCR	CYFIP2	ordinary	36.4626
NUPL2	CPSF2	ordinary	32.5821
DVL1	FGF2	redundant	17.71
PDGFRA	FGFR1	ordinary	35.2553
NUP88	GEMIN7	ordinary	38.6975
SLC12A5	ATP1B3	ordinary	45.9944
TGS1	SLC27A1	ordinary	66.858
P4HA2	COL5A1	ordinary	50.1189
TREM2	PDPK1	ordinary	46.5815
KCNC3	ATP1A2	ordinary	19.2796
CALM3	TCAP	ordinary	38.9084
CASP3	GAS2	ordinary	33.9129
ATP6V0A4	AK7	ordinary	96.4762
CATSPERG	RASGRP1	redundant	15.4265
ATP1A3	SLC6A12	redundant	31.4357
LEF1	HIST1H3H	ordinary	21.062
NDC80	STAG2	ordinary	15.8428
SLC1A1	LRRC49	ordinary	56.4749
IGF2R	MYO10	ordinary	58.0474
TCIRG1	SLC25A5	ordinary	41.4549
PPFIA3	VAMP2	redundant	18.6529
GPSM2	CCR5	ordinary	56.9633
CACNA2D4	RASGRP2	redundant	38.1619
BLNK	DGKH	redundant	19.2158
AKT2	PDE3B	ordinary	14.6434
MAPK1	SPRY2	redundant	62.1868
POLH	XRCC2	ordinary	28.6723
VAMP8	ARPC5	redundant	18.3473
PSMC1	WTIP	ordinary	27.4879
CNOT6	PAIP1	ordinary	20.8438
PTEN	HGS	ordinary	19.3289
ORAI2	CACNB3	redundant	39.2557
EPHA1	EFNA5	ordinary	24.2766
POLR2L	H2AFJ	ordinary	22.5048
GTF2H1	NCBP1	ordinary	14.2924
ALS2	RAB5C	ordinary	38.0217
GNA11	INPP5B	ordinary	63.7935
PHKA1	PYGM	ordinary	105.776
CPT1B	MORC2	ordinary	45.3891
CD14	TRAF3	ordinary	12.9877
RAD50	XAB2	ordinary	20.5299
SUMF2	ARSB	ordinary	78.7129
PIK3C2B	DAB2	redundant	51.4345
CNDP2	PPCS	redundant	30.2831
DVL1	EPHB3	ordinary	12.6233
GNB1	FGF9	ordinary	31.6517
PSMD6	GTSE1	ordinary	30.875
CD79B	PIK3R1	ordinary	39.4853
SLC9A3	SLC4A7	ordinary	308.029
RTF1	UBE2B	ordinary	27.5719
GNB1	LCK	ordinary	39.9709
ADAMTS3	COL5A3	ordinary	19.0697
LCLAT1	ACLY	ordinary	34.977
BLM	POLR2E	ordinary	27.3962
CLCN2	SLC12A3	ordinary	66.6265
POFUT2	THSD7B	ordinary	20.3327
SLC1A3	QARS	redundant	13.0368
SEH1L	HSPA4L	ordinary	41.6968
ARL6IP5	TTLL6	ordinary	18.7745
TCF7L1	HIST1H2BK	ordinary	18.1821
PKM	ATP6V0B	ordinary	30.8372
INPPL1	AVPR2	redundant	100.6
PIK3CB	PDPK1	redundant	37.3904
UBQLN2	TACR1	redundant	43.118
FURIN	NOTCH1	redundant	20.7323
SLC35B3	CHST7	ordinary	25.3289
SRSF10	DHX9	ordinary	45.6916
EGFR	WASF2	redundant	13.8361
ARHGAP31	RHOC	ordinary	36.1213
RASGRP3	KRAS	ordinary	20.2985
CNKSR1	MAP2K2	ordinary	26.9406
SEC11C	RPS17	ordinary	40.5106
STON1	ACTR3	ordinary	67.8217
GNB4	RASGRP2	ordinary	40.7828
PLEKHG5	RHOH	ordinary	22.1525
BARD1	HMGN1	ordinary	18.6768
GPSM2	CXCL8	redundant	64.039
PIP4K2B	FRS2	redundant	19.4149
UBC	XRCC3	redundant	21.8411
STAM2	AGTR1	ordinary	29.8887
PIP5K1B	BCR	redundant	27.6692
CCNK	CHEK1	ordinary	20.7863
MAPK3	ABI2	redundant	29.9376
ABCC9	ATP1B1	ordinary	30.9638
NUP214	CPSF2	ordinary	23.9004
FGF9	GAB1	ordinary	31.2302
EP400	HIST1H2AC	redundant	62.8084
DVL1	AP2A2	redundant	18.6662
EDC3	LSM1	ordinary	16.4442
PDE1B	GMPR2	ordinary	29.6207
DCTD	RHCG	ordinary	57.8739
PSME4	LIMD1	ordinary	35.6517
ACOT2	HADHB	ordinary	21.8842
ABCB10	HMOX2	ordinary	33.8203
PGK1	GAPDH	ordinary	41.4652
RXRA	PDHX	redundant	35.448
PSMB5	BUB3	ordinary	23.8319
PIP4K2B	HLA-E	ordinary	18.1523
BTK	ITPR1	redundant	23.1112
PSMC3	NFKB2	redundant	18.4018
RPS15A	FBL	ordinary	31.6782
UAP1	ALG14	ordinary	13.7929
FCGR1A	FGFR4	ordinary	59.6608
PKN1	PPP1R14A	critical	54.8307
ERAP2	HLA-B	ordinary	16.1958
SEC11A	RPL39L	ordinary	15.0173
MYD88	RHOA	ordinary	21.9444
SEC24D	CD59	ordinary	24.7397
PSMD14	REL	redundant	15.02
ACTR3	VAMP3	ordinary	35.8378
SLC4A5	RANGRF	ordinary	66.1897
COPS4	STON2	redundant	13.3383
PSMA4	SPOPL	ordinary	16.1777
PTEN	VAV3	redundant	13.7613
CAMK2G	ITGA1	ordinary	25.6168
SOS1	PAK2	redundant	19.4369
PCP2	S1PR1	ordinary	23.7313
SOCS5	NEDD8	ordinary	28.2264
POLD4	BARD1	ordinary	41.8317
ATP2B4	NEB	ordinary	37.9163
RPS3A	TBL3	ordinary	30.8676
ACSL6	ELOVL7	ordinary	44.3948
HIP1	WNT5A	ordinary	68.9276
PRMT6	H3F3A	ordinary	73.852
ATP2B1	PRKCZ	redundant	18.9273
GPSM2	CCR1	ordinary	57.0677
P2RX4	RASGRF2	ordinary	27.1139
SLC4A5	SCN9A	ordinary	60.9384
B3GLCT	SPON1	ordinary	66.6866
DBF4	MCM5	ordinary	69.065
LRP6	PPP2R5C	ordinary	20.1972
PSME3	CDC20	ordinary	13.2593
ATAT1	GNPNAT1	ordinary	43.7918
LCK	STAT5A	redundant	31.8378
POLR1D	H3F3A	ordinary	63.6731
POM121C	SP100	ordinary	21.5376
MED15	FABP4	ordinary	14.3838
RPS28	PWP2	ordinary	12.8459
ACSL3	ELOVL1	ordinary	15.7935
ARHGAP26	CDC42	ordinary	39.6426
PIP5K1C	SH3GL1	ordinary	39.3847
STX1A	SLC1A2	ordinary	32.9096
MAPKAP1	AKT3	ordinary	18.0356
CDKN2A	RUNX3	ordinary	44.5516
KL	CUX1	ordinary	60.2535
DNAJB6	HSPA2	ordinary	84.1701
PSMC2	LNPEP	ordinary	21.048
RRAGC	SLC7A6	ordinary	16.5395
ATAT1	NAA30	ordinary	57.5522
RAP1B	MAP2K1	ordinary	22.4565
PSMC2	VHL	ordinary	17.3645
TRIP10	RHOT1	ordinary	24.5166
ARHGAP10	RHOBTB2	ordinary	22.4197
IL1RAP	BTK	ordinary	13.0046
PSMB10	TNFSF12	ordinary	17.4314
SPCS3	SEC61G	ordinary	47.7065
ATXN7	HIST1H3H	ordinary	15.7222
PPP2R2A	FOXM1	ordinary	36.9657
FZR1	MCM5	ordinary	24.6758
CD79B	PRKCE	redundant	48.1566
USP13	BECN1	redundant	30.5531
PIK3R5	BCR	redundant	27.854
H2AFV	H3F3B	ordinary	87.6146
2020-03-02	SLC3A2	ordinary	42.7267
ARHGAP4	RHOU	ordinary	31.9761
SEMA3A	DPYSL3	ordinary	18.8504
ORAI2	CALM1	redundant	36.8902
CAMK2D	MYL9	ordinary	36.3716
PSME4	OAZ2	ordinary	33.4078
TRPC4AP	SORBS1	ordinary	23.9584
CCNK	POLR2A	ordinary	13.8049
TDP1	PRKDC	redundant	16.6262
SEC16A	SEC31A	ordinary	26.0716
ARHGEF12	CDC42	ordinary	28.4309
VAMP3	INPP4B	ordinary	42.3682
SLC22A2	MAOA	critical	13.663
RMI2	FEN1	ordinary	72.8648
AAAS	CPSF4	ordinary	39.7447
PGM2	TKT	ordinary	24.9347
SOCS3	STAT1	redundant	42.7288
SLC4A3	GABRB3	ordinary	14.4012
PSMA5	EGLN3	ordinary	36.0899
POLR2E	HIST4H4	ordinary	20.3688
TP53BP2	TP53I3	ordinary	32.1886
SLC5A6	AHCYL2	redundant	69.2597
GNG12	DGKZ	ordinary	14.8143
PSME3	MAP3K14	redundant	55.1252
FGFR1	CYFIP2	ordinary	25.855
TP53	CABIN1	ordinary	25.0103
PIK3CB	INPP5J	redundant	55.2758
LY96	IRAK2	ordinary	20.5233
POM121	WDR33	ordinary	22.3184
UBA52	VAMP8	redundant	16.2136
FOLH1	TPGS2	ordinary	14.4256
VEGFA	PLCG1	redundant	20.4043
CCT5	BBS4	ordinary	21.1019
PIK3CB	SLC2A8	redundant	38.7925
ATM	SUMO2	redundant	37.4896
PECR	PHYH	critical	37.5507
MAPK14	HIST4H4	redundant	26.2458
MAP2K1	FXR1	ordinary	18.8726
SLC12A1	HCN3	ordinary	58.3243
CACNA2D2	COLEC11	ordinary	36.7925
UBB	AGTR1	redundant	24.9042
TNFRSF10C	TNFRSF10B	ordinary	36.3352
ZCCHC11	EIF4A1	ordinary	16.0934
BIN1	TGOLN2	ordinary	20.5011
PSMA1	LTB	ordinary	31.4778
DVL3	IRAK4	redundant	24.8559
STON1	SLC2A8	ordinary	87.0692
PICALM	CD4	ordinary	27.356
STARD8	RHOH	ordinary	27.153
SUPT5H	TAF13	ordinary	20.8599
PKM	ATP6V1B2	ordinary	17.9292
GMPPB	ALG2	redundant	39.6398
SLC1A2	TTLL1	ordinary	32.6438
CNGB1	ATP2A2	ordinary	37.1942
KCNQ4	ATP1A1	ordinary	23.1433
B3GNT8	MUC3A	ordinary	13.5911
PPM1A	PRKAG2	ordinary	69.5013
COPS7B	ASB8	ordinary	21.5187
GLYATL1	ACADL	ordinary	124.35
RRP1	UTP20	ordinary	46.3517
CARM1	AGT	redundant	54.0287
IL33	FGF9	ordinary	25.0999
CHST12	CSPG4	ordinary	18.0271
SRC	TRAK1	ordinary	51.5268
PRMT5	HIST1H2AC	redundant	61.5098
TRPC4AP	PRKCZ	redundant	22.2276
LRIG1	EGF	ordinary	33.7548
CLASP1	DIAPH2	ordinary	17.5732
CUL5	RPS27A	ordinary	20.1799
ATP6V1C1	PNP	ordinary	60.5803
GRPEL1	FXN	ordinary	15.8505
P2RX7	MYL9	ordinary	43.4217
CD3E	PRKCQ	ordinary	54.3343
EGFR	PIP5K1A	redundant	24.8382
GMPS	LARS	redundant	45.0288
SNAP25	SLC6A2	ordinary	22.5869
RYR3	CNGB1	ordinary	33.324
SLC4A5	SLC22A4	ordinary	103.322
CBLB	ITPR3	redundant	18.5791
ALAS1	PDHB	ordinary	43.7472
MTMR9	PPP2R5B	redundant	15.1367
ARF3	BET1	ordinary	33.3551
CACNA1D	ANXA1	ordinary	19.2192
SRC	FCGR3A	redundant	14.7537
ATP6AP1	PYGM	ordinary	37.6193
TAF1B	HIST1H2AC	ordinary	73.6985
ATP6AP1	AK9	ordinary	52.1391
LRP5	GSK3B	ordinary	22.002
CCAR2	HSPA2	ordinary	88.1863
ELOVL7	ACSL1	ordinary	50.9346
NUP54	HSPA4	ordinary	16.3736
WNT5A	ARPC2	ordinary	36.9634
DNM1	SLC2A8	redundant	28.0483
IRAK1	CUX1	redundant	54.8541
HADHB	DBT	ordinary	17.8025
PLA2G6	DCTN5	ordinary	20.4648
STIM1	NEFL	redundant	78.2143
HLA-DRA	LCK	ordinary	44.2365
COPS2	DCAF7	ordinary	19.8939
ATP6V0D1	UPP1	ordinary	63.1892
GNB5	TRPC3	redundant	34.4544
FBXO10	CUL1	ordinary	40.4617
PIK3CD	PTPN13	redundant	29.2041
PEBP1	MAP2K2	redundant	55.478
KAT5	LIG3	ordinary	13.5911
FNBP1L	SCARB2	ordinary	17.3195
TRPC4AP	CALM3	redundant	42.701
NUP210	SUMO1	redundant	27.6235
B3GAT3	BGN	ordinary	39.8663
POM121	INCENP	redundant	32.8118
SYK	KL	redundant	30.5542
GNGT2	ITK	ordinary	22.0965
SCNN1A	FXYD4	ordinary	25.6838
PSMD6	PPP2R5A	redundant	24.5886
ITSN2	EPS15L1	ordinary	70.1317
HRASLS5	GDPD3	ordinary	60.9638
BIN1	VAMP2	ordinary	28.299
RPS5	WDR46	ordinary	18.3585
TRAF6	FCGR1A	redundant	17.9126
BEST1	CA12	ordinary	47.9726
RPA3	RAD51AP1	redundant	30.731
FKBP1B	PPP3CA	ordinary	71.4084
MAPK3	BLZF1	ordinary	13.5162
ITPR1	SLC24A1	ordinary	23.7082
PLCG2	TEC	ordinary	79.3174
COPS5	CUL3	ordinary	25.7961
PIP5K1B	PIK3CB	ordinary	20.0481
FXYD3	KCNQ1	ordinary	25.5891
SPCS3	RPS3	ordinary	26.4356
SEC11A	RPS28	ordinary	28.0314
SLC25A5	ATP6V0E2	ordinary	45.6668
IRAK1	MYO18A	redundant	24.6976
PDGFRA	WASF3	ordinary	25.272
GNAI1	CALM1	redundant	43.3579
CSNK1E	DVL3	ordinary	31.2357
ARHGAP35	HRAS	ordinary	52.0597
WDR19	PDE4C	ordinary	83.3266
COPS5	FBXL7	redundant	21.7572
ANO4	SLC6A12	ordinary	58.1674
SH3GL1	ARPC1A	ordinary	43.8783
PTEN	FRS2	redundant	21.917
ATP1A3	SLC4A8	ordinary	63.1913
TOMM20	HSPA9	ordinary	46.7333
FN1	MAP2K2	ordinary	39.3457
PSME2	ANAPC2	ordinary	20.8877
AAAS	HSPA1A	ordinary	29.4174
TKT	MPI	ordinary	27.0553
RBL2	CDC6	ordinary	12.797
GPSM3	GNAI2	redundant	43.5728
RYR2	CACNA1C	redundant	14.0723
HDAC10	HIST1H2BD	ordinary	16.0597
TRPC4AP	PXN	ordinary	36.8077
NUP160	HSPA4L	ordinary	49.7525
RB1	CDT1	ordinary	50.4122
GAB2	MYO18A	ordinary	66.4779
ARHGAP5	RAC3	ordinary	21.9516
FXYD4	S100A8	redundant	13.0728
EXOSC5	RPS6	ordinary	23.7391
HDAC1	CDK1	ordinary	68.914
GNGT2	CACNB2	ordinary	32.6341
CDK1	H3F3A	redundant	39.6774
POM121C	HSPA4L	ordinary	60.4277
PIK3R5	STON2	redundant	28.1624
TCIRG1	AK9	ordinary	20.3711
ARHGAP35	RHOT1	ordinary	45.1766
NME1	IFT122	ordinary	30.6815
PACSIN3	DAB2	ordinary	57.8239
SAE1	SUMO3	redundant	30.8068
OCRL	EGF	redundant	40.1028
ARHGAP19	RHOG	ordinary	27.0667
CHN2	RAC3	ordinary	21.658
PSMD10	HNRNPD	ordinary	21.9684
COPS6	BTBD1	ordinary	22.4212
DNM3	IGF2R	redundant	44.599
SF3B1	HIST1H3H	ordinary	32.1709
PLD1	PITPNM3	ordinary	20.2306
CALM1	STXBP1	ordinary	20.0583
GTF2H2	GTF2F1	ordinary	15.4617
VAMP3	PIP5K1C	ordinary	45.3199
AK9	ATP6V1E2	ordinary	23.8867
AKAP9	PLN	redundant	33.8768
ACOT2	ACSF2	ordinary	77.9249
DBF4	PRIM1	redundant	79.37
ERBB4	ZMYM2	redundant	22.3024
GRB2	VAMP3	redundant	27.82
ABCD1	PLA2G16	redundant	41.0943
FXYD6	KCNJ10	ordinary	41.6378
CD79B	DGKH	redundant	49.3519
PIK3CB	VAMP3	redundant	45.3851
RIOK3	RPS27L	ordinary	14.1366
TRPM7	CAMK2B	redundant	25.9314
SUCLG1	HADHA	ordinary	22.2823
PPFIA1	SLC1A3	ordinary	19.286
BIRC2	TICAM1	ordinary	19.2065
CATSPERG	PPFIA3	ordinary	20.1575
PIAS2	UBE2I	redundant	55.6599
SEC24C	F8	redundant	26.0455
CLCN7	SLC4A8	ordinary	62.8079
ATP1B1	KCNJ16	ordinary	51.1293
OPLAH	SLC25A22	ordinary	14.0127
CASP6	LMNA	ordinary	26.1562
EP300	VEGFA	redundant	27.3336
ATG12	ATG10	critical	13.0014
PTEN	GNB2	ordinary	17.6636
EED	HIST1H2BD	ordinary	24.3076
PDGFRB	PDPK1	ordinary	23.784
PSMD11	ANAPC1	ordinary	13.7688
ARHGAP26	RHOQ	ordinary	32.1307
SLC6A8	ATP1B1	redundant	38.9269
STAT2	STAT1	ordinary	32.0777
GNG11	PRKCD	ordinary	63.3948
EGF	BAG4	redundant	22.3671
SAP18	H2AFX	ordinary	23.8178
OSBP	PPM1L	ordinary	66.9987
PSMC4	TRAF2	redundant	31.7774
SLC1A1	ATP1A1	redundant	38.6414
PPP1R12B	MYH14	ordinary	34.2114
SPTLC2	HDAC6	ordinary	32.5708
COPS7A	DDB2	redundant	30.0556
CAMK2G	ATP2C1	ordinary	38.0261
RXRA	ANGPTL4	redundant	14.2995
ARHGAP27	RHOJ	ordinary	30.8312
ADRA2A	GNB1	redundant	48.7285
PSMC3	CUL5	redundant	20.864
DVL1	PIK3R4	redundant	26.7193
ADCY1	HCN2	ordinary	140.543
2020-09-02	PRKAR2B	ordinary	59.7885
CUX1	VAV2	ordinary	48.6464
NELFB	CHEK1	ordinary	22.4437
ZFHX3	CDKN1A	ordinary	14.3766
LDLR	SCARB2	ordinary	16.4006
RPS24	DIEXF	ordinary	13.2866
AP2B1	IGF2R	ordinary	30.2339
ERBB2	AKT1	ordinary	46.1994
PTPRA	HRAS	ordinary	27.3054
MCOLN3	AKAP9	redundant	15.0619
TRPC1	RIMS1	ordinary	28.5055
PTPN22	HLA-DQB1	ordinary	21.4596
SPTBN1	TMED2	ordinary	17.1004
CBL	SYT11	redundant	41.0037
KAT5	POLR2K	ordinary	13.1007
ACOT13	SLC27A2	ordinary	31.3596
AHCYL1	GNAI1	redundant	40.602
TPCN2	RAB3A	redundant	42.6425
ARHGEF38	RHOC	ordinary	39.6501
SREBF2	CYP51A1	redundant	29.864
ATP6V0A4	UPP1	ordinary	84.8066
EIF5	RPS15	ordinary	29.3698
RNF8	SUMO2	ordinary	37.5488
EXOSC3	NOL6	ordinary	41.9784
SH3KBP1	ITPKB	redundant	19.6394
PPFIA1	SLC22A2	ordinary	22.2878
TAF9B	HIST1H2BN	ordinary	22.0859
CAMK2D	ANXA2	ordinary	17.3988
SEC24D	FOLR1	ordinary	23.8126
GSR	GSTO2	ordinary	23.5781
PSMD7	GOT1	redundant	31.9773
BCR	RHOC	ordinary	43.1576
GNG7	GAB1	ordinary	13.7617
MAPKAP1	SGK1	ordinary	34.0937
PSMD8	AMER1	redundant	25.3282
MCOLN3	SORBS1	ordinary	16.4619
STX1A	MCOLN3	ordinary	12.6315
GCGR	GNG5	ordinary	17.56
CACNB1	TPM3	ordinary	30.4763
PIP5K1A	SYK	redundant	29.6993
FGF9	ABI2	ordinary	50.8595
IRAK4	SHC1	redundant	24.8671
LCLAT1	LPIN3	ordinary	18.5927
AKAP1	LMOD1	ordinary	55.4234
CHD4	HIST3H2A	ordinary	53.7422
ARL2BP	CALM3	redundant	28.5558
CARM1	NPAS2	redundant	50.3388
PIP5K1B	VEGFA	redundant	24.8838
SLC26A6	ANO4	ordinary	53.068
PIP5K1B	PPP2R5D	redundant	15.1849
POM121	HSPA12B	ordinary	35.1556
SPCS1	RPL24	ordinary	21.4853
AP2A1	PTPN13	redundant	24.2425
DIAPH2	SPC24	ordinary	20.0849
MPC1	DLD	ordinary	30.254
RYR2	ATP2C1	ordinary	17.1158
CDC37	GAB1	ordinary	16.849
AKAP1	MYL9	ordinary	40.1311
STX1A	TRPC1	redundant	19.5363
AKT3	PHF20	ordinary	16.5378
PSMD5	WTIP	ordinary	33.2475
ATP1B1	SLC3A2	redundant	38.521
NUP37	HSPA1L	ordinary	20.3373
NLK	MYC	redundant	29.5753
CAMK2D	EPB41L1	ordinary	19.3471
ATP1A3	KCNQ5	ordinary	53.2804
RPIA	PRPS1	ordinary	18.7179
MAML2	HEYL	ordinary	43.3521
EXOSC10	WDR75	ordinary	25.7416
PTPN22	HLA-DPA1	ordinary	14.4253
SRSF10	SRSF2	ordinary	36.3181
FGF9	FCGR1A	ordinary	30.4598
ANAPC4	FZR1	ordinary	19.1085
CHRM3	GNAQ	ordinary	22.3168
DLD	GCDH	ordinary	29.9449
GNPAT	MORC2	ordinary	16.8168
EXOSC9	IMP3	ordinary	17.6635
TPCN1	SLC24A2	ordinary	20.3015
GNB1	ERLIN2	ordinary	18.5227
ARHGAP11A	RHOD	ordinary	26.5373
RAF1	RAP1A	redundant	15.2203
SRI	ATP1B2	redundant	38.6244
GAB2	FCGR1A	ordinary	72.3247
PSMD11	AJUBA	redundant	54.5561
MORF4L2	HIST1H2AC	ordinary	58.5583
PREX1	RHOB	ordinary	80.9235
NUP88	SNUPN	ordinary	29.6717
ERCC2	RAD51D	redundant	20.5702
SSB	POLR3H	ordinary	13.966
SCNN1B	SLC4A7	ordinary	69.6802
TPCN1	TPM3	ordinary	13.1305
CA2	ATP6V1G1	ordinary	20.2451
CUL3	DVL3	redundant	14.1331
XRN1	LSM3	ordinary	25.8413
UBA52	POLD3	ordinary	33.1647
SPIDR	BLM	ordinary	37.2751
TYROBP	CNTRL	ordinary	15.1636
AP2A1	INPP4B	redundant	24.1007
TRPM3	PRKCB	redundant	38.3033
PIP5K1A	PDGFRA	redundant	47.9824
RPS5	EMG1	ordinary	18.6078
SLC4A7	MFSD2A	ordinary	53.4424
AHCYL1	CPLX1	ordinary	33.8518
SLC35A1	ST3GAL3	ordinary	13.5603
CATSPER2	DMD	ordinary	21.8994
NUP205	GEMIN8	ordinary	24.5789
B4GALT6	MUC4	ordinary	61.5232
PLD4	CHKB	redundant	15.7947
DCUN1D5	CUL4B	ordinary	40.5844
EGF	FGFR2	redundant	29.9484
APP	TPM4	ordinary	29.6068
USP3	HIST1H2AC	ordinary	61.9077
SLC4A7	SLC9A4	ordinary	43.5017
TRPC3	NFATC1	ordinary	31.2684
NMT1	ACSL4	ordinary	17.7948
PICALM	LDLRAP1	ordinary	28.5313
RGS16	GNAI1	ordinary	61.8801
EIF1AX	RPL4	ordinary	13.2447
PIP5K1A	AKT1	redundant	57.7341
GPSM2	GNAI3	redundant	86.4071
SUDS3	HIST1H2BD	ordinary	14.927
INPP5D	ARRB1	ordinary	57.4493
PIK3CB	UBA52	redundant	21.5831
ACTR2	TACR1	ordinary	26.8035
ADRB2	PIP5K1B	ordinary	26.7976
CASK	VAMP2	redundant	22.9038
HLA-DPB1	LCK	ordinary	41.4095
ATP6V0D2	PNP	ordinary	113.728
STAT3	ICAM1	ordinary	77.1325
B2M	CYFIP1	ordinary	37.552
PCP2	ADRA2A	ordinary	41.2156
ATR	HIST4H4	redundant	20.3002
TIAM1	RHOQ	ordinary	47.5088
ARL2	ATP6V1C1	ordinary	17.599
TRPC3	ATP2A1	ordinary	52.4465
CDK12	FANCI	ordinary	18.1057
PIK3AP1	ITK	ordinary	41.4472
UBA7	DDX58	ordinary	27.722
CHCHD4	CHCHD5	ordinary	13.8147
DNAJC2	HSPA12B	ordinary	41.721
SLC7A7	SLC4A4	ordinary	52.9976
NEFL	HRAS	redundant	13.6149
PPP2R1B	BRAF	ordinary	25.2306
PSME2	AMER1	redundant	33.2545
BOP1	RRP36	ordinary	32.3498
TRPC1	ACTA2	ordinary	26.0666
PIK3R5	ABI2	redundant	34.3881
CACNB4	TPM1	ordinary	60.9515
FXYD3	KCNJ10	ordinary	34.3618
CCNB1	BIRC5	redundant	96.7048
PIK3CB	FCGR1A	redundant	23.0755
LIG3	CCNH	ordinary	16.1635
SLC24A2	CALM1	redundant	26.8504
ARHGAP26	RAC2	ordinary	14.426
CDK1	SKA2	ordinary	24.5241
BARD1	GTF2H1	ordinary	21.5844
BARD1	HIST3H2A	redundant	53.975
CNGB1	PPFIA1	ordinary	39.6878
PLCB4	OCRL	ordinary	40.6951
SLC4A5	SLC12A2	redundant	90.8172
MCOLN1	TNNC1	ordinary	73.7012
SEH1L	SLBP	ordinary	36.3569
CDK5	FOXO3	ordinary	14.3813
NUP37	SNRPG	ordinary	21.9234
PLEKHG2	RHOH	ordinary	21.6255
ASPH	PLN	redundant	25.8484
ARHGAP4	RHOT2	ordinary	69.5603
DVL1	PDGFRB	redundant	13.8002
CCNB2	PPP2R1A	redundant	22.7726
NUP188	TOP2A	redundant	38.9641
ARHGAP8	CDC42	ordinary	35.6188
ATP1B3	SLC6A6	redundant	27.7688
FAM20A	CHGB	ordinary	23.1425
SLC25A6	ATP6V1C2	ordinary	20.1143
SEC11C	RPS23	ordinary	20.5045
ACADS	ECHS1	ordinary	54.3909
PDGFB	FGFR3	redundant	121.829
CTR9	HIST1H2BC	ordinary	18.6129
TRAPPC3	RAB1A	ordinary	30.3814
PSMA6	KLHL12	ordinary	14.0995
HRAS	CNKSR1	ordinary	12.7803
GNB5	DGKH	redundant	23.5997
SUPT4H1	TAF11	ordinary	47.096
PIP5K1B	ARRB1	ordinary	63.0508
EYA4	HIST2H2BE	ordinary	20.9892
NBN	GTF2H5	ordinary	15.6437
GNB2	ITPR2	ordinary	34.334
SLC39A7	SLC39A8	ordinary	14.6048
DEGS1	COL4A3BP	redundant	32.2433
SNX9	TGOLN2	ordinary	20.9508
COPS5	FBXO41	ordinary	14.4961
ORAI1	CALM3	redundant	66.2958
DCTD	RHBG	ordinary	52.2985
CAMK2G	CALM3	redundant	53.3173
PIP4K2B	SDC4	redundant	45.8341
SCNN1A	SLC9A8	ordinary	20.447
ACOT9	BCKDHA	ordinary	15.0861
BHMT2	DARS	ordinary	55.1817
RAD50	H2AFX	redundant	27.8181
PSMD8	ANAPC5	ordinary	18.9718
RXRA	ATP1A2	redundant	19.7599
NR1H4	HSD3B7	critical	28.0695
KLB	ABI2	ordinary	31.279
ACOT2	ACSS1	ordinary	62.7782
TOMM5	HSPA9	ordinary	43.2197
CALM2	PDE3A	ordinary	13.0759
HDAC8	GNPNAT1	ordinary	34.2884
MET	RAP1B	ordinary	44.6383
AKAP1	CPNE1	ordinary	25.4933
COPS2	ASB13	ordinary	37.5397
SLC6A6	ANO6	ordinary	13.402
STAM2	EPS15L1	ordinary	79.874
TRPV6	CACNB3	redundant	24.1429
LIN7C	SYN1	ordinary	23.0726
COPS7A	DCAF4	ordinary	33.5981
PSMA2	BIRC3	redundant	27.0433
MAPK14	RPS6KA5	ordinary	38.2624
NUP50	HSPA5	ordinary	32.7665
SLC6A13	DLG4	redundant	96.0662
ARHGEF28	LIMK1	ordinary	51.4951
PIP5K1A	IL1RL1	ordinary	78.5578
ANK2	TMED10	ordinary	40.6381
RHOC	LIMK1	redundant	82.7201
ARHGEF15	RHOBTB1	ordinary	21.3003
CAMK2D	TLN1	ordinary	16.8404
INPP5K	FCHO2	ordinary	13.749
NUP35	HNRNPC	ordinary	51.3623
NUP62	SMN1	ordinary	28.1021
SLC4A2	CA12	ordinary	42.7446
SUPT4H1	SP1	ordinary	21.9035
ARL6IP5	ATP1A2	redundant	30.1157
CACNB2	TMOD1	ordinary	22.7099
B3GAT3	AGRN	ordinary	42.5692
SLC38A2	DARS	redundant	23.9512
NME1	AK2	redundant	25.9188
PIP5K1B	MTMR2	ordinary	12.7599
FGFR1	FGFR3	ordinary	97.6881
SLC25A28	ISCU	ordinary	36.564
USP8	MET	redundant	44.2976
CALM3	ATP1A2	redundant	42.3751
NCOA2	G0S2	ordinary	23.2882
CALM1	SLC9A6	redundant	13.9635
2020-09-02	TUBB	ordinary	56.2488
KCNC4	SLC12A1	ordinary	57.3041
AKAP9	CALD1	ordinary	47.7515
ARHGEF16	RHOT2	ordinary	40.702
LPCAT3	PLD4	ordinary	42.0931
CACNA2D4	ANXA2	ordinary	38.867
TRPC3	ATP2A3	ordinary	37.6961
CLCNKB	SLC6A12	ordinary	21.783
CEL	ABCA10	ordinary	13.6251
LGMN	HLA-DRA	redundant	53.4966
RBBP7	NEDD8	ordinary	12.9757
ARHGAP1	RHOB	ordinary	78.9658
FGFR2	MYO18A	ordinary	16.9596
PSMD14	GTSE1	ordinary	24.4584
KDSR	CERS4	ordinary	62.7514
ARHGAP22	RHOV	ordinary	13.9687
SEC23A	CNIH3	ordinary	25.3373
GNL3	PELP1	ordinary	14.4525
ACLY	ACAT2	ordinary	41.0904
KMT2D	H2AFJ	ordinary	42.466
ATP1B3	SLC12A7	ordinary	16.7474
PSME4	APC	redundant	13.7306
RMI2	CUL4B	redundant	52.0247
P2RX7	TCAP	ordinary	16.0234
BOP1	RPS2	redundant	54.4283
KCNIP3	SLC12A2	ordinary	48.4203
ARF4	USO1	ordinary	24.6626
CSNK2A1	TP53	redundant	41.5638
CCNB1	CDC16	ordinary	14.3506
SLC1A3	SLC4A7	redundant	53.8056
GLE1	POM121	ordinary	26.0028
ATP6V1H	MTAP	ordinary	27.2168
SLC12A2	KCNC4	ordinary	21.4326
CSGALNACT2	BGN	ordinary	25.8781
DTYMK	ATP6V0D2	ordinary	67.8029
CACNB4	STXBP1	ordinary	23.995
TTC21B	SUFU	redundant	17.0732
PIK3R1	BAIAP2	redundant	29.5156
GNB2	GNAS	ordinary	47.9244
PIP5K1B	FYN	redundant	16.9718
HDAC2	HIST1H2AE	ordinary	22.0365
CATSPER2	MYL9	ordinary	41.6252
A2M	RHOT1	ordinary	33.3354
CD79B	INPP5B	redundant	45.0461
WRN	FAAP100	ordinary	22.2009
PSMB3	SPOP	ordinary	30.0914
BARD1	TCEA1	ordinary	25.6346
TULP3	PRKAR2A	ordinary	14.0705
BCR	VAV3	ordinary	22.4722
GPT	KARS	redundant	18.7241
MAPKAPK3	CBX6	ordinary	33.9428
HGF	HRAS	ordinary	30.2674
RING1	UBE2I	ordinary	47.7347
GUK1	IFT122	ordinary	31.5436
RYR3	CAMK2D	redundant	29.4848
TRPV6	ATP2A1	ordinary	41.5657
ATP1A2	KCNIP1	ordinary	20.6575
RAB10	EXOC1	redundant	17.1891
PGP	AQP9	ordinary	35.8858
GNG2	RAC1	ordinary	14.1126
PDGFA	GRB2	redundant	48.1377
RANBP2	SNRPB	ordinary	29.7596
MTMR9	PPP2R1B	redundant	19.2402
FGFR3	LCK	ordinary	115.64
SLC8B1	CALM3	redundant	30.3025
PIK3CB	AP2A1	ordinary	13.1179
PDHA1	NAGS	ordinary	20.139
NAGS	DLST	ordinary	19.4991
ATP2B2	PPP3CB	ordinary	53.9948
PIP5K1C	BIN1	ordinary	51.1122
PSMC4	SPOPL	ordinary	16.7672
ORAI1	MYL12B	ordinary	35.0859
PCCB	MCEE	ordinary	21.5432
SLC24A1	COLEC11	ordinary	42.1777
KDM7A	MAP2K2	ordinary	26.5922
NUP205	HSPA1B	ordinary	21.4986
TRIP10	RAC2	ordinary	69.3431
AAAS	SNRPD3	ordinary	28.299
AKT2	GSK3A	ordinary	41.2509
RFC3	BLM	ordinary	38.7001
RBM28	UTP6	ordinary	40.5793
GPSM1	SSTR5	ordinary	27.2708
GPAT4	ACSL6	redundant	49.9748
USP2	TRAF2	redundant	36.6583
PSMD3	ANAPC16	ordinary	32.0631
BLM	FAAP100	ordinary	18.0765
RIN1	GDI2	ordinary	17.5911
LYN	PLCG2	redundant	57.8293
PLA2G4F	LPGAT1	ordinary	58.8633
SPTBN4	COPZ2	ordinary	74.2576
CCNB1	SMC2	ordinary	19.2659
FBXO30	NEDD8	ordinary	15.5802
TRPC3	ANXA2	ordinary	26.8222
MTMR3	PIGA	ordinary	29.9629
SRI	ATP1A2	redundant	23.161
ARF5	COPZ1	ordinary	15.7224
PSMC1	OAZ2	ordinary	35.1476
SOS2	RHOBTB2	ordinary	30.8629
PSMB8	EGLN1	ordinary	22.4443
GNG7	ATP1B2	ordinary	34.2393
SOS1	PIK3AP1	ordinary	36.7706
CACNA1C	CACNB1	ordinary	28.1752
FN1	SYK	ordinary	15.6533
CACNB2	ATP2A1	ordinary	44.2623
KCND3	ATP1B3	ordinary	49.1129
PSMB6	KLHL12	ordinary	13.213
FGF9	FGFR2	ordinary	32.9533
ATIC	ADSS	ordinary	20.81
E2F1	EZH2	ordinary	103.465
TPCN2	PYGB	redundant	46.2797
PSMA1	REL	redundant	22.3185
PPARGC1A	PCK1	redundant	42.3054
ATP2B4	TPM3	ordinary	27.0394
CACNA1D	CACNA2D4	ordinary	24.3163
IRAK1	FGF1	redundant	87.0279
SLC6A8	SLC9A9	redundant	44.401
AK2	SLC25A5	ordinary	53.2576
AHCYL2	SLC1A2	ordinary	98.8252
DCTN4	HSP90AA1	ordinary	26.8566
NCALD	SLC24A1	ordinary	35.6568
TPI1	GPD1L	ordinary	48.3301
LPIN1	CEPT1	ordinary	24.9866
TREM2	INPP5K	ordinary	31.7808
ASPH	TPM3	ordinary	21.8107
RRP8	H3F3A	ordinary	51.5422
PSMD13	RELA	redundant	16.5503
ACOT1	ACLY	ordinary	34.4069
TPCN1	TNNI1	ordinary	35.9945
PITPNM3	LPIN2	ordinary	18.6359
MCOLN1	CNGA1	ordinary	24.9628
CACNA2D3	ATP2A2	ordinary	34.863
CACNB1	TMOD2	ordinary	18.122
FGF1	SHC1	ordinary	64.6598
PSMD7	TAP1	ordinary	21.1786
PSMC5	RPS27A	redundant	28.755
CNGB1	SORBS1	ordinary	32.5682
CLTC	PLEKHA2	redundant	64.3348
SLC25A6	ATP6V1A	ordinary	41.722
AHCYL2	CA12	ordinary	108.531
STIM1	SLC24A1	ordinary	81.2122
CAMK2B	HSF1	redundant	64.4299
COPS2	VHL	ordinary	15.6479
CNGB1	ACTG2	ordinary	28.3135
PSMF1	AMER1	redundant	24.9934
LAMC3	HGF	ordinary	45.4867
P3H3	COL7A1	ordinary	45.015
ATP1A3	KCNC3	ordinary	28.4616
FOLH1	LRRC49	ordinary	34.6602
TLR6	IRAK1	ordinary	31.4898
RRAGA	IARS	ordinary	15.1023
ST3GAL1	MUC4	ordinary	87.003
CALM2	ORAI2	ordinary	35.0707
ITPR2	VDAC2	ordinary	28.2594
HMGB1	NFKB2	redundant	22.5523
FBXL3	CUL1	ordinary	31.9192
CD79B	PRKCQ	redundant	83.7382
PTPN6	HLA-DQB1	redundant	16.2942
STON1	PLEKHA1	ordinary	72.7823
MET	PLCG1	ordinary	37.7793
ATR	FANCM	redundant	36.5296
ERCC6	HIST1H2AE	ordinary	16.9469
NRG2	AKT3	ordinary	51.912
DNAJC2	HSPA13	ordinary	29.8111
ATM	UBB	redundant	14.2428
RPA2	RAD50	redundant	64.6687
CLCN7	ANO1	ordinary	35.2049
FNBP1L	TFRC	ordinary	19.3756
NFIX	POLR3C	ordinary	24.2581
ORAI1	PPP3R1	ordinary	36.7258
P2RX1	RASGRF2	ordinary	33.2914
KIT	INPP5D	redundant	60.1458
POLH	XRCC3	ordinary	27.3883
UNC80	AKAP1	ordinary	37.3564
GATAD2A	EP300	ordinary	40.728
TSC2	MTOR	ordinary	16.8817
GNG10	ITPKA	ordinary	84.8286
PCNA	RMI2	ordinary	55.6423
PSMD4	TAP1	ordinary	15.2933
PTPN11	CYFIP1	redundant	23.0265
KIT	FGFR1OP2	redundant	72.2036
DVL2	GNAI2	redundant	28.7765
SRC	STAT1	redundant	28.5673
P2RX1	MYL9	ordinary	39.6935
ABR	RHOD	ordinary	19.8356
CTR9	UBE2B	ordinary	14.9953
HIP1	VAMP4	ordinary	74.7005
ATP1B3	KCND3	ordinary	49.1129
PIP4K2B	CLTA	ordinary	22.7337
PIP5K1C	GNGT2	ordinary	38.4202
DLG4	TPM2	ordinary	28.2424
PIK3CD	LRRFIP1	redundant	25.525
BLNK	ITPR1	redundant	23.4712
HAUS3	AJUBA	ordinary	75.6068
RPA1	XRCC2	redundant	43.1813
EGFR	CSK	ordinary	16.748
NUP88	HSPA5	ordinary	31.306
ATP6V1B1	AK9	ordinary	47.8166
SPCS2	RPS27	ordinary	20.9656
PIK3R1	FGFR1OP	redundant	24.3827
KAT5	HIST1H2BC	redundant	16.5768
AKAP13	RHOA	ordinary	20.6077
AGBL5	GLUL	redundant	26.4341
KAT2A	TAF1D	ordinary	21.207
CDC27	CXCL8	ordinary	12.9137
NCOA6	AGT	redundant	92.7773
PSMD6	PPP2R5E	redundant	20.0055
CFTR	ACTR2	redundant	61.4524
B2M	KL	ordinary	54.0043
CNGB1	STX1A	ordinary	29.3087
APH1B	NOTCH2	redundant	26.8738
ADCY3	PDE7B	ordinary	36.9222
AKAP1	PRKCA	redundant	17.9243
SH3GL1	DAB2	ordinary	38.0296
KL	VAV1	ordinary	26.5386
FXYD3	SLC20A2	ordinary	17.5844
PSPH	SERINC5	ordinary	17.2156
PSMA4	LTBR	ordinary	15.0928
FZD1	PPP2R5C	redundant	48.1405
PSME3	PPP2R5D	redundant	25.0623
COX6C	CYCS	ordinary	130.737
SLC12A2	KCNJ2	ordinary	21.4268
MCOLN1	GRIN2A	redundant	22.6522
TRPC3	STX1A	ordinary	29.1458
KCNH2	ATP1B3	ordinary	24.5633
GNGT2	INPP5B	ordinary	26.8493
NIPA2	MMGT1	ordinary	42.0193
AGPAT2	LPIN2	ordinary	13.6227
PSMB2	TNKS	ordinary	15.7893
ARRB2	MAP2K2	ordinary	72.7884
NEK9	NUP214	ordinary	14.9739
PIK3R1	TRIP10	ordinary	22.0933
AADAT	AASS	ordinary	18.6254
EPHB4	EFNB3	ordinary	59.1488
TCP1	BBS7	ordinary	19.1905
FGF2	INPP5K	ordinary	18.5296
CACNA2D4	PPP3CA	ordinary	40.4213
PPP1R12B	MYL9	ordinary	37.1338
NSMCE1	UBE2I	ordinary	33.0555
SLC12A7	SLC6A6	ordinary	17.7056
SRC	MAP2K2	redundant	26.1576
SOS1	INPPL1	redundant	57.2625
ERBB2	BRK1	ordinary	21.2961
CATSPERG	ITGB5	ordinary	22.2677
ATP1B3	SLC1A1	ordinary	34.0247
BHMT2	RARS	ordinary	57.8668
AGTPBP1	AIMP2	redundant	27.8355
PIP4K2B	EPHB4	ordinary	53.6082
TCF7L1	HIST1H2AE	ordinary	23.1392
ITPR2	ATP2A1	ordinary	54.3913
FGFR4	MYO18A	ordinary	52.9824
GOLGA2	GORASP1	ordinary	29.1585
SUCLG2	PDHA1	ordinary	24.171
AGBL3	EEF1E1	redundant	96.331
ATM	KDM4B	redundant	37.2426
GNA14	INPP5B	ordinary	32.6599
SYNJ2	MTMR6	ordinary	39.1029
MFNG	NOTCH3	ordinary	19.7255
PIK3CG	STAM2	redundant	17.5875
RYR2	TCAP	ordinary	19.3138
PSMA7	RBX1	redundant	23.5132
ALG10	RPN2	ordinary	32.8797
PIK3CB	CFTR	redundant	74.8059
DENND2A	GDI1	ordinary	40.6336
GALNT6	MUC4	ordinary	98.4062
POLR1E	H3F3B	ordinary	89.1299
PSMB3	GTSE1	ordinary	30.2784
NUP155	ALYREF	ordinary	24.7436
TTC21B	PDE8B	ordinary	15.3247
ATP1B2	SLC5A3	ordinary	45.3662
APP	SORBS1	ordinary	15.6203
PLPP5	PRKCB	ordinary	33.0206
AK2	ABCC4	ordinary	27.016
HLA-DQB2	PRKCQ	ordinary	61.289
PPP3R1	YWHAE	ordinary	16.5548
PSMD14	LTBR	ordinary	17.6082
SYNJ2	PPP2R1B	redundant	25.5896
RBBP8	POLR2J	ordinary	29.7164
PRMT6	HIST1H2AC	ordinary	93.8468
PLA2G4C	MBOAT1	ordinary	19.5906
METAP1	AIMP2	ordinary	42.3521
TAF10	TP53	ordinary	26.6976
TRPM2	CAMK2D	redundant	24.3185
SPCS3	RPL21	ordinary	27.7854
RPS8	RRP7A	ordinary	19.1873
DERL2	UBA52	ordinary	15.668
LIG1	RPA1	redundant	25.6523
TRPM6	CACNA1D	redundant	19.4044
EXOSC1	EMG1	ordinary	16.3588
AKT2	MEAF6	redundant	34.4494
WRN	RFC5	ordinary	34.503
CDC42	SKA2	ordinary	36.5964
GNG5	CNTRL	ordinary	18.5481
LTB	TRAF3	ordinary	28.2246
IL1RAP	CD86	ordinary	16.5052
CUX1	FYN	ordinary	43.6847
BARD1	POLD1	redundant	27.0833
GRIK3	CACNA1D	redundant	46.6917
TOMM5	TOMM40	redundant	55.565
RAE1	GEMIN4	ordinary	23.2452
DNAJC6	PICALM	ordinary	37.5902
MYO9A	RHOBTB1	ordinary	24.6632
ATP6V1B1	PKM	ordinary	36.6534
TREM2	MYO18A	ordinary	25.6204
EPN2	ACTR2	redundant	63.2102
DYNC1H1	HLA-DRB5	ordinary	17.7157
ADAM10	EFNA5	ordinary	23.4137
AAK1	PLEKHA1	ordinary	23.591
C2CD5	EXOC7	ordinary	24.5321
CCNB1	BUB1B	ordinary	99.046
CACNA1D	FCN3	ordinary	23.0324
XRCC1	POLD3	ordinary	21.5069
BAZ1B	H2AFZ	ordinary	42.3522
GNAQ	TRPC6	ordinary	19.3182
CACNA2D3	PXN	ordinary	41.1616
SLC8A1	STIM1	ordinary	75.2577
HSPA2	HSF1	ordinary	121.078
RFC3	RMI1	ordinary	22.1776
PSMC6	TAP2	ordinary	14.7733
FXYD3	SLC12A2	redundant	25.1946
IFT122	PDE11A	ordinary	46.5455
SLC24A3	CATSPERG	ordinary	23.8361
NUP160	CPSF4	ordinary	15.4941
SLC26A6	ANO10	ordinary	27.5301
P2RX4	ACTA2	ordinary	21.2835
CACNA1D	TRPM3	ordinary	27.2359
SLC12A2	ANO9	ordinary	25.0081
TYROBP	FGFR3	ordinary	94.4293
ATP6V0D1	PYGB	ordinary	58.0011
NDC1	HSPA12B	ordinary	22.4539
IL12B	STAT3	ordinary	83.6611
KL	KRAS	ordinary	38.6126
NRG2	BAG4	ordinary	52.1839
BLM	TCEA1	ordinary	16.8772
DVL3	NRG3	ordinary	26.8479
ALDOB	ALDH1A1	redundant	114.024
TACR1	PIP5K1B	ordinary	28.868
RPA2	KAT5	redundant	58.6316
CCND2	TFDP1	ordinary	16.4903
CHEK2	BRCA1	ordinary	26.5073
KCNQ3	ATP1A3	ordinary	22.6875
SPCS2	SSR1	ordinary	30.0924
POLD2	BRCA1	ordinary	22.4479
PSME3	SUFU	redundant	13.5471
EIF1AX	RPL36AL	ordinary	19.054
EXOSC8	KRR1	ordinary	13.0465
HLA-DPA1	PRKCQ	ordinary	56.5161
[truncated: 53,172 more rows]

## Sheet: KIRC
node1	node2	edge_type	activity
NUP98	CDCA8	ordinary	64.4629
SOCS1	LY96	redundant	59.852
ATP2B2	DYSF	ordinary	155.537
SOCS1	TLR2	ordinary	75.2211
PAF1	HIST1H2BC	ordinary	18.4427
EGFR	FGFR3	ordinary	75.8571
NFYA	DDIT3	ordinary	14.7514
PIK3CA	CD3D	redundant	96.0599
TRPM6	PRKCD	ordinary	234.144
NR1H4	ATP1B1	ordinary	152.751
SH2D2A	CYFIP2	redundant	391.005
INPP5K	AP2A2	ordinary	74.2901
NMNAT2	NADSYN1	critical	99.5152
PLAT	PDGFD	ordinary	252.507
PIP4K2C	ERLIN2	redundant	340.912
ATP6V1E1	ADPGK	ordinary	171.923
CATSPERG	ANXA1	ordinary	103.799
FGFR1OP2	FYN	ordinary	58.9254
NOL12	HEATR1	ordinary	71.9449
PIK3R6	BIN1	ordinary	136.572
ACVR2B	BMPR1A	ordinary	80.0307
GNG7	PRKCQ	ordinary	222.661
CCNB2	SEC13	ordinary	178.865
KDR	RAC1	redundant	44.1126
STAT4	LCP1	ordinary	242.131
PSMB7	PPP2R5C	redundant	49.1369
CACNA2D3	SLC24A4	ordinary	287.125
FCGR1A	FGFR1OP	ordinary	196.725
RIOK3	RPS4X	ordinary	63.8438
ST3GAL3	MUC12	ordinary	93.8791
TADA3	HIST2H2BE	ordinary	53.3725
COPS8	KLHL25	ordinary	20.6294
PIP5K1A	WASL	ordinary	48.4251
CHMP4A	UBA52	ordinary	117.977
AGO4	CDKN2A	ordinary	217.745
GNG11	INPP5K	ordinary	44.2869
ATP6V1F	AK7	ordinary	105.726
ELL	RPS27A	redundant	35.0213
MAPK3	NCKAP1	redundant	47.0357
MYD88	LAT2	ordinary	269.389
PIP5K1C	GNAI3	redundant	17.6479
SEC23A	SEC22B	ordinary	86.3644
COPS4	WDR5	ordinary	48.9106
EYA4	RAD50	ordinary	275.517
PSMA4	CDC16	ordinary	54.7648
ADCY7	AKAP5	ordinary	177.245
POM121C	SNRPF	ordinary	79.3386
GNAI1	CACNA2D1	ordinary	121.681
ANK3	KDELR3	ordinary	72.7485
PLCE1	DAGLB	ordinary	163.839
MTMR14	PLBD1	ordinary	35.0271
GRIA4	SLC9A6	redundant	62.9718
GTF2H5	POLR2B	ordinary	51.6098
AP2A1	DAB2	redundant	39.0661
CACNA1D	CACNA1F	ordinary	52.7788
ARRB1	MAPK3	ordinary	70.8168
DZIP1	GLI3	redundant	15.6681
SLC25A4	GNAI1	redundant	178.323
MCOLN1	MYL12B	ordinary	36.564
VCL	MAPK1	ordinary	62.2806
IVD	MCCC1	ordinary	263.858
RPL38	UPF1	ordinary	138.425
RFC5	XRCC2	ordinary	156.358
SLC25A13	QARS	ordinary	42.6092
KIF2C	HLA-DRB1	ordinary	127.953
EXOSC6	DIEXF	ordinary	29.4424
SIRT1	TAF1B	ordinary	94.768
GNG12	DGKA	ordinary	99.0566
SEC11A	RPL36AL	ordinary	53.0704
NIP7	UTP15	ordinary	82.6972
JUN	KDM6B	ordinary	41.538
TRIM24	RAC1	ordinary	37.9243
CATSPER3	MYL6B	ordinary	92.1493
DNA2	RFC1	ordinary	64.4317
SRGAP3	RAC1	ordinary	309.871
LPCAT3	ATAT1	redundant	26.8502
PIK3CD	BAIAP2	redundant	58.7026
FBXO11	CUL1	ordinary	71.0925
BRD8	HIST1H4I	ordinary	35.7481
SPRED2	RASAL3	ordinary	175.417
ATM	RBX1	redundant	90.0932
PSMD8	ANAPC16	ordinary	19.9656
HLA-DQB1	ZAP70	ordinary	237.22
ATP6V0C	ARL2BP	ordinary	22.0061
ATP6V0B	AK7	ordinary	113.245
NRG2	PLCG2	ordinary	62.4467
SLC5A9	KCNJ11	redundant	29.4752
PSMD7	REL	ordinary	19.669
CAMK2G	CPNE7	redundant	70.5353
AGXT2	ALAS1	redundant	99.6312
EXO1	POLR2E	ordinary	82.4235
HK2	SLC37A1	ordinary	194.957
CAPZB	HSP90AA1	ordinary	83.7583
HIST1H2BC	CHEK2	ordinary	91.4084
SUPT16H	CHEK1	ordinary	63.5603
EP300	HSPB2	ordinary	74.2226
FGF1	TXK	ordinary	453.667
EXO1	POLR2L	ordinary	59.3106
RAB3IP	RAB8A	ordinary	21.2112
ARHGAP6	RHOBTB2	ordinary	14.5502
POLR2H	FANCI	ordinary	118.536
SMYD3	HIST1H4H	ordinary	30.4972
CACNA1F	PPP3CA	ordinary	63.6639
TRPM6	SNAP25	ordinary	268.061
AGPAT4	SLC27A2	ordinary	60.926
BIRC2	LY96	redundant	63.3863
HIST4H4	UBE2I	ordinary	89.0386
NCOA2	AKAP9	redundant	168.755
P2RX4	CAMK2G	ordinary	106.714
USP21	TAB1	ordinary	84.0632
IRAK1	CYFIP2	redundant	309.145
GPS1	SOCS3	ordinary	23.3929
SLC25A16	BCKDHB	ordinary	109.727
SUCLA2	CPT2	ordinary	214.997
GNG5	SLC12A1	ordinary	469.535
TSC1	RRAGD	ordinary	31.5347
COPS7A	BTRC	redundant	78.3724
CCNB2	CENPU	ordinary	286.45
PIP5K1A	RAP1B	redundant	56.6068
PIK3R6	APOB	redundant	135.033
EXO1	FANCE	ordinary	94.5722
BRCA1	SYCP2	ordinary	37.8021
EIF5	EIF4G1	redundant	32.5234
NRG1	INPP5J	ordinary	27.0549
CHD4	HIST1H2AC	ordinary	28.739
AGFG1	ACTR3	ordinary	138.416
ADCY9	RAPGEF3	ordinary	138.057
PDGFB	KRAS	redundant	20.9916
RYR1	CALD1	ordinary	26.8291
CACNA2D3	NFATC1	ordinary	212.246
SLC17A1	GRIN2A	ordinary	46.124
RORA	NPAS2	redundant	21.3844
GNPDA1	MPI	ordinary	79.0224
SPTBN5	COPZ1	ordinary	47.7876
FURIN	PDGFA	ordinary	46.3723
ARHGEF19	RHOH	ordinary	85.9375
AGBL5	RARS	redundant	43.8635
DAPP1	CALM2	ordinary	30.3649
SH3KBP1	NCK1	ordinary	131.237
PIK3CA	FGF2	redundant	26.0511
FAM13A	RHOQ	ordinary	23.3506
PSME2	SKP2	ordinary	73.257
GNG2	ITPKC	ordinary	61.773
ROCK1	MYH9	redundant	58.6335
MAN2B2	MANBA	critical	40.2786
MCAT	HADHA	ordinary	39.2769
STX1A	NEFL	redundant	22.9373
INPP5J	AP2A1	ordinary	71.7537
GPSM3	ACKR3	ordinary	241.992
PIK3R5	AP2A1	ordinary	206.04
PRKAG2	LAMTOR5	ordinary	22.7247
SLC5A8	SLC4A7	ordinary	13.6482
TP53	NDRG1	ordinary	110.365
TCIRG1	DTYMK	ordinary	114.437
TAGAP	RHOC	ordinary	107.488
TNFSF13B	MAP3K14	ordinary	162.689
SCN4A	SLC17A3	ordinary	57.8339
CTTN	VAMP2	ordinary	36.5771
PSMC5	LTBR	ordinary	67.6821
HMGCR	ACSL4	redundant	306.573
AGPAT3	LPIN1	redundant	68.8159
RUNX3	TEAD1	ordinary	144.235
DDX58	CASP8	ordinary	168.905
PSMD6	CKS1B	ordinary	82.4335
RPS15A	WDR36	ordinary	60.0375
SLC35A3	MGAT4B	ordinary	47.6133
CEP152	AURKA	ordinary	65.052
IRAK3	TOLLIP	ordinary	49.2636
ST3GAL6	OMD	ordinary	31.5571
PRKAA1	RB1CC1	ordinary	155.468
CDK1	H2AFZ	redundant	125.213
UBE2V1	PRKCQ	redundant	120.66
CDK6	TFDP1	ordinary	33.6192
SLC52A2	RFK	ordinary	21.0907
DUSP7	MAPK7	ordinary	84.8403
ATP1A2	GNB2	ordinary	18.9061
GRIA4	CALM3	redundant	77.6866
PIP4K2B	GNA15	redundant	90.8564
IL1RL1	FYN	ordinary	94.7001
B3GLCT	THSD7A	ordinary	90.1834
MAPK7	MEF2A	ordinary	42.064
MAT2B	SLC25A26	redundant	38.3014
ATF2	HIST1H4H	redundant	31.2895
EYA2	HIST1H2BC	ordinary	51.6228
PDPN	PRKCQ	ordinary	110.433
UBC	PIP5K1A	redundant	97.465
USP21	TRAF2	redundant	139.713
CD36	IRAK2	ordinary	85.7948
SLC28A1	CAMK2G	ordinary	84.6303
ERCC1	ATM	redundant	82.0868
TRPM3	PPP3CA	ordinary	26.502
FTSJ3	DDX49	ordinary	65.5493
CLIC2	RASGRF2	ordinary	53.9148
CAMK2G	AKAP1	redundant	77.2452
AK9	ATP6V0E2	ordinary	83.535
PSMB6	UBB	redundant	62.6236
UBA52	RFC1	ordinary	87.2233
ARAF	ITGA2B	redundant	26.8062
DDX21	H2AFX	redundant	27.2703
MCOLN1	TLN1	ordinary	28.3635
SUCLA2	ACSM1	ordinary	109.589
NFIA	POLR3K	ordinary	60.892
LIG1	AQR	ordinary	118.281
THEM5	ACADL	ordinary	17.0159
DVL2	AXL	redundant	107.716
ABCC3	ALB	ordinary	99.2683
PIK3CD	NCKAP1	redundant	82.6816
FRS2	LCK	ordinary	39.7831
FCGR2A	PLCG1	ordinary	145.562
PSMC3	CDC27	ordinary	67.0371
ORMDL2	MORC2	ordinary	46.6211
PLCE1	PRKCD	ordinary	46.1702
STIM1	MYL3	ordinary	45.7716
CARM1	HMGCS2	redundant	62.1744
SLC6A20	CAMK2G	ordinary	39.5854
GNA14	TRPC6	ordinary	90.9051
PSMC2	CDC20	ordinary	74.0386
AGMO	NOS3	redundant	17.2712
NUP98	SMN2	ordinary	17.4359
CDK1	CDC26	ordinary	20.1495
PSMA6	MAD2L1	ordinary	62.196
PIK3CG	CLTCL1	ordinary	55.307
PSMA4	OAZ2	ordinary	71.719
TRAT1	ZMYM2	ordinary	77.6112
PSMA5	BIRC3	redundant	115.132
KDM4A	SUMO1	ordinary	31.7723
ZMYM2	ABI2	ordinary	88.3424
USP1	MUS81	ordinary	59.1089
STAT3	JUNB	ordinary	36.2212
GRB2	SYT11	ordinary	17.1858
EPC1	HIST4H4	ordinary	40.5759
PSMA2	NPEPPS	ordinary	14.7215
CACNA2D4	CPLX1	ordinary	70.2287
PSMD9	UBE2E1	ordinary	13.3442
TRAPPC4	CHML	ordinary	30.3606
MYD88	ERLIN2	ordinary	88.3959
KAT5	RFC4	ordinary	91.3863
PSMB6	SMURF2	ordinary	13.6334
ICOS	CUX1	ordinary	92.1716
CPT1B	AACS	ordinary	93.9317
PIK3CD	VAMP3	redundant	52.9283
COPS2	COMMD8	ordinary	92.9254
SLC4A7	CAMK2G	redundant	39.3024
SMAD4	SMAD7	ordinary	45.4957
SRC	CD247	redundant	131.874
VAV1	TXK	ordinary	168.628
PIK3CB	FGFR2	redundant	97.4205
PSMA6	OAZ3	ordinary	48.91
AKT1	GUCY1A3	ordinary	31.8235
MCOLN3	VDAC3	ordinary	30.1997
ATP2B1	PPP3R1	ordinary	65.3095
SUMO1	KDM4B	redundant	123.31
XRN2	RPS15A	ordinary	60.0645
CBL	IGF2R	redundant	115.845
EIF5	RPS6	ordinary	43.4584
FGB	MAP2K2	ordinary	23.2124
FGFR1OP	STAT3	ordinary	93.8815
PSMC4	SKP1	ordinary	17.5315
PSMB2	PRICKLE1	redundant	53.1759
NRG2	NCKAP1L	ordinary	116.693
POU2F2	POLR2A	ordinary	85.7716
C1GALT1	MUC13	ordinary	54.3894
RNLS	PXDN	ordinary	72.8291
CNGA1	AKAP9	ordinary	161.133
HBEGF	BRK1	ordinary	62.0954
TRPV2	ATP2A2	ordinary	199.005
PPIB	COL11A2	ordinary	64.834
ARHGAP33	RHOT2	ordinary	243.997
SLC25A13	MARS	ordinary	20.1186
SUOX	PRDX3	ordinary	236.161
ATP1B3	KCNN4	ordinary	116.768
LDLR	LRP2	ordinary	41.866
TRPC4AP	PYGB	ordinary	69.1239
EXOSC9	WDR46	ordinary	105.264
PSENEN	DTX2	ordinary	177.617
PDGFRB	INPP5D	ordinary	158.136
PSMC5	PPP2R1B	redundant	32.5693
MTA2	HIST3H2A	ordinary	59.0889
RFC2	RAD51AP1	ordinary	212.493
P3H3	COL5A3	ordinary	193.432
FAM20C	FSTL3	ordinary	50.9643
MED1	TXNRD1	ordinary	24.9289
DLG1	VDAC1	ordinary	47.8668
NIPAL2	MMGT1	ordinary	58.0564
DNA2	FANCI	redundant	165.055
ATP1A1	SLC28A1	ordinary	643.263
TRAT1	INPP5D	ordinary	272.834
GNB4	ZMYM2	ordinary	69.1948
IL33	WASF3	ordinary	139.427
MAPK1	FGFR2	redundant	71.1285
RBBP4	BRD1	ordinary	13.1692
PIP4K2C	PIK3R3	ordinary	285.631
ORAI1	SORBS1	ordinary	42.7313
PIP4K2B	LRP2	redundant	25.8159
CCDC8	BIRC5	ordinary	106.336
RMI1	APEX1	ordinary	41.3409
PSMC5	NPEPPS	ordinary	23.7567
RAE1	AURKB	ordinary	122.796
GPSM3	CXCL8	redundant	144.564
TPCN2	MYL6B	ordinary	62.3622
PIP5K1B	EGFR	redundant	147.947
AKT2	BRPF1	redundant	41.0213
PIK3R3	AKT2	redundant	34.1979
COPS8	SKP2	ordinary	40.5537
POLR1D	HIST1H2BN	ordinary	145.815
NUP85	HSPA4L	ordinary	99.6335
HIST4H4	H2AFX	ordinary	38.3933
PSMD12	TNFSF12	ordinary	51.2372
ERBB3	NCKAP1	ordinary	46.3207
NME1	TTC21B	ordinary	69.3251
ANK2	TMED9	ordinary	140.156
TRPM6	ATP2A1	ordinary	293.35
GNAI1	TRPM6	ordinary	332.323
HIST1H2BD	H2AFX	ordinary	45.6136
HPN	MST1	ordinary	57.2572
PIK3C2B	ACTR3	redundant	29.2996
NUP214	PHAX	ordinary	54.7349
XRCC5	TMEM173	ordinary	69.8317
DVL1	EPHB6	ordinary	35.4722
CTH	SPTLC1	ordinary	215.237
LPGAT1	ACSS2	ordinary	105.521
NUP188	CPSF4	ordinary	35.9536
RBBP8	HMGN1	ordinary	32.4163
FOLH1	GCLM	ordinary	33.4251
GLE1	TPR	ordinary	51.6233
NFYA	PMVK	ordinary	13.5597
CHAC2	CNDP2	ordinary	87.1956
ATP1B1	SLC12A1	redundant	590.58
PSMB10	NFKB1	redundant	84.5189
FBXW4	CUL1	ordinary	36.2309
TAF6L	HIST1H3H	ordinary	63.0666
PIP4K2A	TF	redundant	70.4609
PPP5C	NRAS	redundant	36.9645
ORAI2	TMOD1	ordinary	18.4349
POLK	RAD50	ordinary	147.146
SLC25A16	CPT2	ordinary	42.0827
RBBP8	CCNH	ordinary	36.0645
DCTN5	HSP90AA1	ordinary	128.261
GNGT2	WASF2	ordinary	45.1811
SYDE2	RAC3	ordinary	60.2505
VAMP7	SH3D19	ordinary	138.243
ITSN1	ARPC1B	ordinary	53.9289
GNGT1	CACNA2D2	ordinary	298.181
CACNA1E	VAMP2	ordinary	43.7317
SLC38A9	RPS6KB1	ordinary	91.5127
PTGS2	PTGIS	ordinary	23.9819
ANO1	SLC6A6	ordinary	77.9361
TYROBP	KL	ordinary	213.27
ASB7	NEDD8	ordinary	20.9036
CALM1	PYGL	redundant	166.869
P2RX7	PLN	ordinary	193.79
FXYD6	SLC6A1	redundant	93.4313
CEACAM1	FN1	ordinary	114.304
FKBP1B	VAMP2	ordinary	65.1634
PSMB6	CDK2	redundant	38.307
HAUS5	AURKA	ordinary	102.793
CACNA1E	ATP2C1	ordinary	36.6661
CLTCL1	AGTR1	ordinary	20.9166
MMP9	CDH1	redundant	128.32
SEC24C	SERPINA1	ordinary	41.478
FGFR3	BRK1	ordinary	39.117
MGLL	AQP9	ordinary	59.0892
PIP5K1C	PIK3CD	redundant	69.6583
CD3D	ARPC5	ordinary	201.342
AK7	ATP6V0A2	ordinary	118.022
DEK	HIST1H4I	ordinary	36.1112
RPS15A	EMG1	ordinary	71.905
CA13	ATP6V1D	ordinary	56.8194
CACNA2D1	MYL6B	ordinary	20.6679
OSBPL10	SACM1L	ordinary	51.0404
IL1RAP	FCGR1A	ordinary	155.348
MET	BCR	ordinary	161.752
AGTPBP1	BCAT1	ordinary	58.3897
DHCR24	CYP7B1	ordinary	24.2904
SPCS2	RPL21	ordinary	16.2954
CAMK2G	SORBS1	redundant	65.3449
PIK3R1	CD3G	redundant	78.8417
ATP1B1	CNGA1	redundant	241.902
ACTR8	RAD23B	ordinary	159.916
HGS	EGFR	redundant	81.7362
TRPV4	DYSF	ordinary	88.9539
REEP4	OR51E1	ordinary	171.365
TNRC6C	NOTCH4	ordinary	124.055
GNB1	ATP1A1	ordinary	581.189
PTPN6	HLA-DRB1	redundant	285.364
AGTPBP1	TTLL1	ordinary	21.0091
CEPT1	PLA2G4A	redundant	113.982
NRG2	FCGR3A	ordinary	157.902
IFT140	AKAP5	ordinary	63.2033
SMDT1	SLC8B1	ordinary	37.2145
TBL1XR1	FADS1	redundant	46.167
GNG2	DGKI	ordinary	58.1966
KCNJ11	FXYD1	ordinary	33.5996
CCNB2	TPR	ordinary	65.4165
PSMB2	TNFSF14	ordinary	105.379
ARHGAP10	CDC42	ordinary	41.1493
PDGFRB	BRK1	ordinary	59.9124
SEH1L	HSPA9	ordinary	17.8594
RPS27A	FANCM	redundant	37.7543
CALM3	TRPC1	redundant	76.5494
ITPR1	TMOD2	ordinary	58.6708
SPTSSA	ACLY	ordinary	126.631
PSMA3	NUMB	ordinary	23.8692
GNG11	NCKAP1	ordinary	65.581
ARFGAP3	COPE	ordinary	39.0347
IFT122	GLI1	redundant	17.0184
MAT2B	GAMT	ordinary	33.6896
DNAL4	AP2A1	ordinary	31.3269
NUP85	FIP1L1	ordinary	100.219
SCN4B	GRIN2A	ordinary	79.0147
PREX1	RAC2	ordinary	215.532
NUP85	KPNA5	ordinary	91.4839
CACFD1	DES	ordinary	80.3003
BARD1	POLR2C	ordinary	15.5116
SMAD2	SMAD7	ordinary	21.437
SPCS3	RPL30	ordinary	101.236
PSMD1	ANAPC5	ordinary	34.3725
ATP6V1H	ABCC4	ordinary	164.11
TRPC4AP	STXBP1	ordinary	14.8256
PI4K2B	CFTR	redundant	13.2244
CSF2RA	KRAS	ordinary	100.732
AP2A1	VAMP4	redundant	40.5807
PKLR	ATP6V1B1	ordinary	53.2909
PSMD10	CCNE2	redundant	128.562
PSMA6	RBX1	redundant	28.4168
SPCS1	RPS5	ordinary	163.792
DNA2	NHEJ1	ordinary	59.6064
TOP3A	PRPF19	ordinary	41.9733
NUP43	CPSF3	ordinary	13.5776
PIK3R5	TFRC	redundant	165.872
CACNB1	RAB3A	ordinary	71.9816
DHRS9	RDH12	ordinary	95.3269
CRLS1	BCKDHB	ordinary	111.947
PFAS	TTLL4	ordinary	53.9531
NMT2	ACSL4	ordinary	203.777
PDGFA	LCP2	redundant	200.332
COMMD8	CUL5	ordinary	153.175
ATP1B2	ARL6IP5	redundant	33.8669
RPL39L	UPF1	ordinary	84.5835
BRAF	CLCN6	ordinary	61.3674
PIK3R1	VAMP3	redundant	21.0469
ETHE1	TST	ordinary	38.3632
SLC5A12	SLC17A3	ordinary	93.0632
DNAJC6	SNX9	ordinary	86.568
ATM	MDM4	redundant	145.412
SEC11C	SEC61A2	ordinary	21.4127
PPP2CB	RBL1	ordinary	51.6247
SHB	BCAR1	ordinary	72.0619
CALM1	HRAS	redundant	51.7851
GPS1	LMO7	ordinary	112.623
P2RX7	PPFIA1	ordinary	235.801
ITPR2	MYL9	ordinary	73.0954
CAPZA1	FKBP4	ordinary	144.546
UBC	XRCC2	redundant	144.033
CAMK2D	VCL	redundant	65.3996
PIP5K1B	UBC	redundant	167.44
AP2S1	LRP2	redundant	38.9498
RBBP5	HIST4H4	ordinary	92.2412
PIK3CD	ARPC2	redundant	108.3
SLC9A5	SLC17A3	ordinary	90.9947
ERCC6	H2AFX	ordinary	44.4086
SNW1	HES1	ordinary	13.7976
CALM3	ANXA1	redundant	111.247
PIP4K2A	CUX1	redundant	43.7122
RPS27A	ISG15	redundant	121.855
HLA-E	SOS1	ordinary	125.26
RUNX1	CAMK2D	redundant	78.9863
SLC25A4	ADCY7	ordinary	145.068
GPS1	RBBP5	ordinary	98.438
AAAS	WDR33	ordinary	43.9428
PIK3CD	PACSIN1	ordinary	77.4811
MTOR	AKT1S1	ordinary	311.79
NEK6	NUP50	ordinary	131.449
CD79A	RASGRP3	ordinary	93.1974
PIK3R6	CBL	redundant	144.516
ORAI1	TPM1	ordinary	79.7328
SOCS2	JAK1	redundant	40.7898
CTPS1	SLC25A12	ordinary	77.6953
SLC6A1	GRIN2A	redundant	95.9321
INPP5D	INPP4A	redundant	155.817
PACSIN2	EGFR	ordinary	72.9983
GNAI1	GRIN2D	redundant	173.226
TPCN1	PXN	ordinary	22.2605
SH3KBP1	ARPC5	ordinary	156.012
PKM	LDHB	ordinary	248.254
REEP5	GNB1	ordinary	32.1037
SEC23A	TMED2	ordinary	82.3283
CAMK2D	JAK1	redundant	34.2427
PIK3CG	BTK	redundant	317.456
FAM20A	LAMC1	ordinary	34.3853
MED27	LPL	ordinary	43.9494
ITPR2	PPP3R1	ordinary	84.3295
AK3	NME4	ordinary	316.885
TRPA1	AKAP9	ordinary	117.206
LPCAT1	MORC2	redundant	177.672
PSMB2	TNFRSF1B	ordinary	137.102
RAD50	FEN1	ordinary	30.5197
TP53	HIRA	ordinary	53.9098
EPHA7	EFNA3	ordinary	122.535
GNB1	ATP1B3	ordinary	71.9833
IKBKB	REL	ordinary	30.4407
DCTN3	AURKA	ordinary	29.5926
LIPT1	PDHX	redundant	37.3564
SCNN1D	FXYD1	ordinary	83.3385
SYNJ1	PLA2G12A	redundant	34.2943
CD79B	TRPC6	ordinary	49.3887
GRIA4	ITGB1	redundant	48.3763
HADHB	ACAA2	ordinary	159.096
NUP205	FIP1L1	ordinary	81.5207
CLCN4	ANO10	ordinary	39.4732
ARL6IP5	SLC17A3	redundant	30.7681
RBBP8	RPS27A	redundant	54.7715
CACFD1	CPNE7	ordinary	96.0835
MPHOSPH6	UTP4	ordinary	16.2003
PIP4K2C	FGF1	redundant	722.772
TF	INPP4A	ordinary	44.0867
CLTB	ARPC4	redundant	103.202
COPS2	GAN	ordinary	42.3941
VAV2	PRKCA	ordinary	118.991
SMS	MTAP	redundant	39.5514
CACNA1F	PYGL	ordinary	197.969
KDR	SYK	redundant	69.1813
VEGFA	AXL	redundant	285.443
FCGR2A	VAV2	ordinary	127.157
DENND1C	RAB8A	ordinary	23.431
P3H3	COL13A1	ordinary	22.3069
REPS1	ACTR2	ordinary	37.165
NCOA1	ATP1B2	redundant	79.6238
NUP62	HSPA4	ordinary	158.226
SLC8A1	CALM1	redundant	90.3569
BRIP1	FANCE	ordinary	84.9199
PIP4K2A	PACSIN1	ordinary	37.2605
PSMD1	PPP2R5E	redundant	72.0902
TRPV4	ITGA1	ordinary	40.3531
GRAP2	PRKCQ	ordinary	189.292
POLR1A	HIST4H4	ordinary	33.7283
SLC2A1	SLC5A4	redundant	139.179
VAV2	RAC2	ordinary	109.808
NUP58	HSPA4	ordinary	72.6444
EXOSC10	RPS2	redundant	117.858
PPP1R12A	MYH9	ordinary	47.1307
ATF4	HSPA5	ordinary	87.3889
TRPV4	STXBP1	ordinary	24.4245
SEC11A	RPL23A	ordinary	111.407
NUP43	DIAPH2	redundant	84.4652
PIP5K1B	PIK3AP1	redundant	97.4864
SNX9	LDLRAP1	ordinary	69.149
MYO18A	CYFIP1	ordinary	78.5728
ARHGEF9	SLC12A1	ordinary	490.605
SLC3A1	SLC3A2	ordinary	20.9727
LCK	CDC42	redundant	37.8536
PDGFA	PDGFRB	ordinary	102.474
CCNA2	ORC2	ordinary	113.667
VEGFA	FYN	redundant	283.429
TRPC6	VDAC1	ordinary	39.3038
PDGFRA	PLCG1	ordinary	119.493
H2AFX	HIST1H3H	ordinary	77.8715
COPS6	SOCS3	ordinary	12.9199
DCTN1	HSP90AB1	ordinary	31.9509
KITLG	SYK	redundant	140.889
GNG10	FXYD2	ordinary	15.5973
NRG1	FCGR3A	ordinary	145.561
PIK3CG	ITK	redundant	214.007
HIBCH	ACSM1	ordinary	103.05
AK9	ADCY4	ordinary	49.1472
TFDP2	CDC6	redundant	176.377
PIK3CB	REPS1	ordinary	33.9434
CTSV	HLA-DQA1	redundant	232.994
PDGFA	FGFR4	redundant	39.0333
CBL	EPS15	redundant	109.159
FBP1	PFKFB2	ordinary	213.185
SLC4A7	RUNX1	redundant	78.0962
ATP1A1	ABCC9	ordinary	575.824
CLTB	ACTR3	redundant	48.3851
PSMC4	ANAPC15	ordinary	20.8976
TSC2	LAMTOR3	ordinary	62.1562
TREM2	TXK	ordinary	184.806
HIST1H2BD	NCAPD3	ordinary	37.9692
RYR3	MYH3	ordinary	67.2235
ASNA1	SEC61A1	ordinary	27.9944
CACNB1	DMD	ordinary	47.9415
ATP1A1	GNG5	ordinary	577.14
EXOSC5	WDR46	ordinary	109.369
EME1	EXO1	ordinary	265.557
ASXL1	HIST3H2A	ordinary	47.9869
FGD1	RHOA	ordinary	21.144
DNA2	UBA52	redundant	90.5185
DOCK7	RAC1	ordinary	20.019
SLC22A5	FXYD2	ordinary	20.9156
CPT1A	ACSS2	ordinary	89.9421
ARHGAP42	RHOF	ordinary	91.4892
RPS24	RCL1	ordinary	54.7543
ELL	XAB2	ordinary	33.2498
GALNT18	MUC20	ordinary	19.1805
ITPR2	PLA2G4A	ordinary	306.413
RBBP4	MEAF6	ordinary	112.069
ARPC5	WNT5A	ordinary	127.438
PSMD10	TNFSF14	ordinary	113.693
FGF2	TEC	ordinary	34.0427
RAC2	RHOB	ordinary	123.189
NUP107	GEMIN4	ordinary	55.3196
PSME1	CKS1B	ordinary	53.5553
INPPL1	SLC2A8	redundant	23.9088
SUPT5H	NELFE	redundant	60.3264
SLC22A5	SLC4A4	ordinary	42.5231
COPS2	KEAP1	redundant	38.1818
GABPB1	GABPA	ordinary	62.945
AKT3	MDM2	redundant	66.4124
UBA6	UBC	ordinary	100.805
CACNB2	ACTA2	redundant	23.4548
CCND1	E2F5	ordinary	140.74
ABL1	WASF3	redundant	159.154
MTMR2	PPP2R5B	redundant	20.8182
GAB2	PLCG1	ordinary	67.2703
ITPR1	ITGB5	ordinary	36.091
SRI	TLN1	redundant	27.1896
PHF21A	HIST4H4	ordinary	85.5985
ARHGAP11B	RHOV	ordinary	99.449
GRB2	WASF3	ordinary	127.262
SLC34A2	CAMK2G	ordinary	38.5536
SH3GL1	INPP4A	ordinary	126.533
GBF1	COPB2	ordinary	90.6624
GPSM3	BDKRB2	ordinary	159.08
ACAT2	HMGCS1	ordinary	89.8846
SLC6A20	GRIN2D	ordinary	59.6248
PIK3R6	PLCG1	redundant	186.041
PRKACB	GLI2	redundant	51.4291
PIK3CB	EPS15	redundant	69.0659
ANAPC2	IL6	ordinary	28.6745
ARHGAP30	RHOV	ordinary	113.645
BARD1	MAD2L2	ordinary	17.669
FXYD1	SLC9A1	ordinary	50.2131
CLOCK	PER2	redundant	80.6335
CD3G	FGFR1OP2	ordinary	85.6422
ARHGEF3	RHOQ	ordinary	134.173
CSK	CD4	redundant	317.406
EIF5	RPS26	ordinary	34.9397
USP2	RNF31	ordinary	72.1231
ATP2B4	DYSF	ordinary	152.914
ANO1	SLC6A12	ordinary	111.111
FXYD2	SLC6A1	redundant	85.432
ATP1A1	KCNQ3	ordinary	598.115
RAD50	XRCC6	redundant	20.2312
CATSPER2	GNAI2	ordinary	98.927
NSMCE1	SUMO1	ordinary	24.1134
NUP155	HNRNPC	ordinary	17.0915
GNAI2	CACNB3	redundant	73.9907
PIK3CA	SNX9	ordinary	68.9455
SRC	KIAA1549	ordinary	21.4828
CDK1	MAD2L1	ordinary	308.263
CA2	PAICS	redundant	41.19
GAB2	CD28	ordinary	52.8529
CD79B	CALM3	ordinary	63.3117
PIK3R3	AP2A1	ordinary	46.1613
PTPN3	SH3GL1	ordinary	218.017
DAB2	EGFR	ordinary	84.1613
APP	STX1A	ordinary	95.291
ITGA2	PTK2	ordinary	90.3038
WNT5A	PIP5K1A	ordinary	60.7946
NUP85	AURKB	ordinary	225.279
TOP3A	LIG3	ordinary	115.227
CHML	RAB3A	redundant	72.2611
ATR	CCAR2	ordinary	17.079
POLR2H	ERCC6	ordinary	51.952
CARM1	HMGCR	redundant	114.198
AGPAT3	PLA2G4A	redundant	109.904
GPS2	HIST1H2BD	ordinary	78.4768
TRPC4	CALM2	ordinary	33.1523
GRIA3	ITGA2	ordinary	38.5696
SLC30A1	PLG	ordinary	70.2823
NEFL	CPLX1	ordinary	26.8882
HAGH	GSTM1	ordinary	37.9735
SLC7A11	SLC1A3	redundant	150.677
PPARA	ACSL1	redundant	215.836
NRG2	NRAS	ordinary	34.5241
SLC3A2	CAMK2G	redundant	71.4673
SCN8A	ATP1A1	ordinary	588.76
PPP2CB	ARAF	ordinary	44.5634
PDGFA	KL	redundant	96.6873
BARD1	CHEK1	redundant	91.1935
TSC2	MLST8	ordinary	17.4805
ARHGEF1	RHOA	ordinary	107.69
TRPM7	UNC13B	ordinary	101.272
IRAK1	FYN	redundant	91.955
FANCA	FANCM	ordinary	90.3405
PPA1	PYGB	ordinary	12.9013
CLTA	ARPC1B	redundant	53.7962
TBP	TP53	ordinary	48.279
SYK	ITK	ordinary	132.217
POLD4	RPA3	ordinary	52.7222
RANBP2	DDX20	ordinary	145.761
PLCD1	SYNJ1	ordinary	81.5187
RRP8	H2AFJ	ordinary	72.2752
EP300	ANGPTL4	redundant	199.094
COPS3	CUL4A	redundant	40.9724
RRAGB	SLC7A6	ordinary	67.4979
UBE2D1	CD14	ordinary	75.9113
PSMC2	KLHL12	ordinary	50.3689
FGFR4	RAC1	ordinary	18.9089
PIK3R6	BRK1	redundant	155.461
XIAP	TLE1	ordinary	52.29
COPS7B	FBXL7	redundant	32.9218
FXYD1	SCN1B	ordinary	149.329
ARID4A	HIST1H2BD	ordinary	25.37
SLC37A1	G6PC3	ordinary	25.8154
COPS7A	DCUN1D1	ordinary	110.493
PDE1C	AK2	ordinary	12.7491
AP2S1	VAMP2	redundant	54.6223
TALDO1	PFKFB2	ordinary	69.7858
ATP1A1	SLC22A15	ordinary	680.338
PSMD7	FZR1	redundant	40.5805
PSMB9	CUL3	ordinary	213.436
GNG2	ITPR1	ordinary	69.3494
PTPN11	KL	redundant	90.4786
C1D	RRP7A	ordinary	28.6466
ERAP2	HLA-G	ordinary	110.808
TACO1	CYCS	ordinary	65.6074
UIMC1	BARD1	ordinary	91.0357
FGFR1OP	CD3G	ordinary	142.915
PIP4K2C	RAP1A	redundant	273.605
PDZD11	ATP1B3	redundant	87.5763
RYR3	SLC24A1	ordinary	35.5712
MED19	CD36	ordinary	68.0674
CATSPER3	TMOD2	ordinary	57.0666
EXOSC4	UTP14C	ordinary	66.3734
JAK2	STAT5A	redundant	41.8916
MMP7	LAMA3	ordinary	54.3042
GTF2F1	MDC1	ordinary	31.4968
STON1	PIP5K1C	ordinary	30.6021
EPHA6	RHOA	ordinary	28.0809
SPTBN5	COPA	ordinary	32.6565
CCND2	E2F5	ordinary	53.1185
ARHGAP35	RASA1	ordinary	79.7228
SLC4A2	ANO1	ordinary	85.4262
SLC5A9	SLC9A8	redundant	18.3316
ATG7	MAP2K2	ordinary	15.7337
ARRB2	TGOLN2	ordinary	202.53
CHD9	TRIB3	ordinary	125.08
CAMK2G	NEB	redundant	52.1279
COPS4	FBXO2	ordinary	125.189
STON2	PTPN13	ordinary	251.725
SLC25A16	DLST	ordinary	101.685
CEP250	AURKA	ordinary	104.019
DVL3	EZR	ordinary	17.9922
TLR4	MAP3K7	ordinary	70.3884
CD4	PLEKHA2	ordinary	120.965
CBL	AGTR1	redundant	26.2595
ARL2BP	ATP6V1A	ordinary	65.8547
CALM1	ATP1A1	redundant	593.261
CLIC2	ACTA2	ordinary	66.4819
BAG4	INPP5D	redundant	174.127
DYNC1LI1	HLA-DRB5	ordinary	73.5702
PPIP5K1	IP6K3	ordinary	17.2427
PLCG2	RAC1	ordinary	27.0037
CEP78	AJUBA	ordinary	20.4749
CD3D	PIP5K1B	ordinary	171.798
DNAL4	NGF	redundant	76.4159
B4GALT7	SDC3	ordinary	94.2505
BLM	EP300	redundant	53.5141
EGFR	CD28	ordinary	101.061
MAP3K11	NRAS	ordinary	81.9235
SPCS2	RPL12	ordinary	63.9619
ATP1A2	SLC5A4	redundant	66.3907
ABCA2	LCAT	ordinary	72.4429
SPTBN1	YKT6	ordinary	21.6179
SLC4A3	ANO7	ordinary	70.4032
HSP90AA1	AURKA	redundant	161.641
PSME1	OAZ2	ordinary	56.8336
TRPC4AP	CACNB3	ordinary	34.2401
SYDE2	RHOH	ordinary	125.695
NUP214	SNRPF	ordinary	67.8735
PIP4K2A	CLTC	ordinary	111.625
PIP5K1A	GNG12	ordinary	43.5936
PDZD11	FXYD6	redundant	30.5448
SLC8B1	MICU3	ordinary	24.4836
TRPC4AP	GNAI2	ordinary	63.6313
GRB2	RAC1	ordinary	27.0161
CDK11B	CEP164	ordinary	105.362
SH3GL1	VAMP3	ordinary	104.178
RMI2	POLR2J	ordinary	26.7753
DYNLL1	RAB8A	ordinary	37.419
CLTCL1	VAMP3	ordinary	30.7934
PLBD1	PLA2G4A	redundant	104.162
PSMF1	TNFRSF12A	ordinary	43.431
GUK1	ATP6V1G1	ordinary	77.1275
HIST1H2AC	GP1BA	ordinary	12.8965
ITSN2	ARPC1A	ordinary	66.8097
GSK3B	POLR2H	ordinary	72.2718
PIP5K1C	SH3KBP1	redundant	67.258
CCZ1B	GDI2	ordinary	33.077
NME4	NADK2	ordinary	69.8299
NBN	NEIL2	ordinary	20.2023
SLC8B1	MCOLN3	ordinary	34.018
PDGFA	FGF2	redundant	42.4156
FXYD6	CAMK2D	redundant	13.6899
INPP5K	PIK3CD	redundant	55.5815
IRAK4	WASF2	redundant	22.6269
SH3KBP1	CALM1	ordinary	55.6999
ARHGAP12	RHOT2	ordinary	45.0758
ORMDL3	ACLY	ordinary	177.734
PSMD14	NUMB	ordinary	22.6016
TFPT	COPS7B	ordinary	44.4547
P2RX1	GRIN2D	ordinary	64.472
CHM	RAB3C	ordinary	59.4291
NRG2	ERBB2	ordinary	166.158
POLE2	BRIP1	ordinary	293.846
CALM2	PDE4D	ordinary	33.783
NRG1	BCR	ordinary	106.413
NEFL	MYL3	ordinary	28.018
RAMP3	GNAS	ordinary	14.1911
RUVBL1	HIST1H2BN	ordinary	63.4004
PLD4	OCRL	redundant	85.4918
DDB1	UBE2M	ordinary	70.2763
SLC22A5	ATP1B3	ordinary	90.9261
PSMD1	UBC	redundant	98.4982
NAGS	PDHA1	ordinary	163.34
TGS1	HMGCS1	redundant	146.214
CTSA	GLB1	ordinary	120.031
UBXN7	UBE2D2	ordinary	70.4967
CACNB3	SORBS3	redundant	66.9237
HLA-DPA1	ZAP70	ordinary	220.328
ARHGEF18	RAC1	ordinary	144.788
PLA2G6	CAPZA1	ordinary	95.794
ACSS2	GNPNAT1	ordinary	69.1038
GNB5	WASF2	redundant	177.887
PSMA4	PPP2R5E	redundant	37.0692
FXYD6	SLC5A8	ordinary	19.9454
RNF111	GTF2H5	ordinary	49.9484
DLG4	CACNA2D2	ordinary	293.368
ARHGEF16	RHOB	ordinary	42.7524
SYNJ2	EPS15	redundant	23.6981
ANO8	SLC6A12	ordinary	47.7099
CACNB3	MYL6B	redundant	35.0099
PIK3CA	NECAP2	ordinary	58.7212
PIAS1	SP3	ordinary	145.378
SRC	NRG2	ordinary	14.13
PLA2G4A	AGPAT3	ordinary	109.904
ATP1B3	KCNJ15	ordinary	112.667
GLYAT	HADHB	ordinary	119.845
ARHGEF15	RHOG	ordinary	109.471
CACNB1	PYGL	ordinary	188.48
PI4K2B	CD3D	redundant	86.6034
NECAP1	INPP4B	ordinary	14.3857
CACNB3	SLC24A3	redundant	24.0882
CTSS	TLR7	redundant	348.164
GNG5	CACNA2D2	ordinary	271.448
CALM3	TRPV4	ordinary	67.5791
ARHGEF6	RHOH	ordinary	213.527
PLCD1	DAGLA	ordinary	76.7602
HIST1H4H	H3F3B	ordinary	39.3841
SRC	FGF1	redundant	453.093
PSMD8	BUB1B	ordinary	54.5086
TRPC6	SRI	ordinary	20.9227
NUP93	NXF1	ordinary	26.5563
F5	SEC24A	redundant	19.2587
CDC42	PPP2R5D	redundant	16.683
CUX1	LCP2	ordinary	172.148
AKR1B1	SORD	ordinary	218.775
HMGCR	MORC2	redundant	138.156
NUP153	GEMIN6	ordinary	38.3869
SEC11C	RPS7	ordinary	42.9134
GPD1L	GPAT4	ordinary	93.4289
TPCN1	STXBP1	ordinary	18.0557
RAI1	CLOCK	ordinary	46.3266
ATP1A1	SLC5A6	ordinary	577.713
ERCC2	POLR2L	ordinary	57.7171
GLCE	GPC6	ordinary	53.1512
PSMD9	ANAPC7	ordinary	28.1374
ATP6V1D	DTYMK	ordinary	41.2886
TRPM7	SRI	ordinary	40.7488
SLC5A4	SLC9A8	redundant	78.8806
CALM1	RASGRP4	redundant	126.22
PRDX6	GSR	ordinary	72.1288
CBL	WNT5A	redundant	53.2391
CPSF6	KL	ordinary	70.5222
GNPAT	ACLY	ordinary	121.758
GNB2	NCKAP1L	ordinary	118.719
ARPC2	FZD4	ordinary	34.4163
ADRB2	MYO10	ordinary	120.553
CAD	VAMP2	redundant	44.4066
PSMB4	RELA	redundant	46.8576
PIK3R5	FGF1	redundant	615.951
CAMK2D	ATP1A1	redundant	584.185
TRPM7	RASGRF2	ordinary	45.6184
PSMC3	CDC16	ordinary	53.6368
CPLX1	RAB3A	ordinary	86.8653
DIAPH2	DSN1	ordinary	142.374
PSMD10	NUMB	ordinary	21.6815
GCLM	GGCT	redundant	25.8764
ATM	GTF2H3	ordinary	90.7127
BRAF	MPRIP	ordinary	19.6068
RFC4	PALB2	ordinary	97.9149
CREBBP	GRHL1	ordinary	69.1949
ADCY9	PRKAR2B	ordinary	284.69
SOS1	VAV1	ordinary	127.504
CERS6	ATAT1	ordinary	27.0176
ARFGAP1	KDELR2	ordinary	56.0736
UBE2V1	NOD2	redundant	117.341
HIST2H2BE	NCAPG2	ordinary	86.284
CBLB	PRKCQ	ordinary	184.136
TRPA1	SLC24A1	ordinary	110.104
POLR2C	NELFE	ordinary	36.9062
GNG12	AKT2	ordinary	48.5611
PSME4	CUL5	redundant	38.419
PIK3CA	TRIP10	ordinary	84.7953
RPS11	BMS1	ordinary	94.3853
NCL	NOL6	ordinary	25.7673
SLC24A3	MCOLN2	ordinary	16.9222
ARHGEF17	RHOA	ordinary	46.586
ARHGAP19	RAC2	ordinary	104.008
NUP107	HSPA5	ordinary	49.7423
PSMB6	CCNE2	redundant	118.637
EXOSC2	GMPR	redundant	187.926
TRPC1	MYL3	ordinary	52.1017
NIP7	NOL6	ordinary	43.9489
PPAT	SLC3A2	redundant	21.3509
SUCLG1	DLD	ordinary	360.7
NUP54	GEMIN4	ordinary	48.2652
BCR	RHOBTB2	ordinary	120.947
AGXT2	PDHX	redundant	52.9653
SLC22A4	SLC9A6	ordinary	50.6362
CTSA	HLA-DPB1	ordinary	106.574
WNT5A	DVL2	ordinary	62.2134
L2HGDH	AADAT	ordinary	136.949
GRB2	FGF1	ordinary	450.897
ARHGAP11B	CDC42	ordinary	107.05
AGO2	NOTCH2	ordinary	63.4632
RPS26	UPF1	ordinary	74.8055
CACNA2D3	TPM3	ordinary	218.604
ARHGEF18	RHOBTB2	ordinary	132.048
POLD4	TOP3A	ordinary	63.9431
CACNB3	TMOD1	redundant	40.4785
CACNB3	ATP2A3	redundant	21.7656
CNGA1	FXYD1	ordinary	140.59
PI4K2B	VAMP3	redundant	37.3527
PMPCA	HSPA9	ordinary	18.6563
AKAP1	DMD	ordinary	40.842
SBF2	PPP2R5A	ordinary	42.7319
FGF1	CYFIP1	ordinary	452.057
GGT7	CALM1	redundant	22.6477
FGFR1OP2	FCGR3A	ordinary	146.808
TREM2	CUX1	ordinary	180.234
CACNA1F	MYL5	ordinary	117.935
SLC24A4	AKAP9	redundant	143.97
NRAS	VCL	redundant	83.8247
BCR	FGFR2	ordinary	166.56
DNAJC6	AP1S1	ordinary	71.2945
ORAI1	NEFL	ordinary	22.7244
CTH	ORMDL1	ordinary	205.653
ADCY6	PDE11A	ordinary	40.2253
ACSL5	ZDHHC2	ordinary	148.477
ALG10	STT3A	ordinary	32.1571
TBL1XR1	GLIPR1	ordinary	88.0883
CSF2RA	AKT1	ordinary	98.1214
EGF	ERBB4	ordinary	601.095
RACGAP1	RHOA	ordinary	57.3476
PSMC5	GSK3B	redundant	25.5897
GNA11	DAGLB	ordinary	162.289
SLC24A3	ATP2B4	ordinary	49.1053
TRPM3	GRIN2A	ordinary	45.3754
SAP30	H3F3B	ordinary	279.908
TRPA1	SNAP25	ordinary	139.953
KAT2A	TBP	ordinary	84.6457
CCND3	E2F3	ordinary	33.1309
FGF2	CD247	ordinary	126.239
IRS2	GRAP2	ordinary	82.1951
POLE3	WRN	ordinary	33.7551
INPP5D	NECAP2	ordinary	234.571
HLA-E	VAV3	ordinary	218.447
ARRB2	VAMP7	ordinary	230.542
CDK4	E2F2	ordinary	109.968
CD3G	BTK	ordinary	316.49
ERBB2	TRIM24	ordinary	173.037
SUZ12	H2AFV	ordinary	106.215
MSL1	HIST1H4I	ordinary	46.5974
SLC1A5	CTPS1	ordinary	12.7042
TACR1	PLEKHA2	ordinary	57.3458
ST6GALNAC3	MUC4	ordinary	61.5399
RABGGTB	RAB13	redundant	46.3231
CACNB3	VDAC1	redundant	48.0213
LYN	LCP2	redundant	442.122
CACNB3	CACNA1F	ordinary	82.5616
CHN2	RHOQ	ordinary	110.544
PDGFRB	WASF1	ordinary	67.1386
APP	PPP3CA	ordinary	101.266
RIOK3	RPS5	ordinary	69.5698
NCOA2	HMGCR	redundant	188.754
JAK2	MAPK3	redundant	33.6968
ESPL1	CENPP	ordinary	67.5108
PSMD5	TNFRSF12A	ordinary	24.0155
RNF4	UIMC1	ordinary	48.7139
GNAI1	NCALD	ordinary	120.593
DVL1	ICOS	ordinary	103.023
SEC11C	RPL12	ordinary	64.9544
CYLD	TAB2	ordinary	132.804
CRTAP	COL13A1	ordinary	24.4111
PIP5K1B	BTK	redundant	204.744
ATP1A1	HCN3	ordinary	593.227
FAR2	ACAA1	ordinary	285.177
MTMR3	PPP2R5D	redundant	55.1236
FXYD1	GNG2	ordinary	67.5287
ATP6V0E2	ABCC4	ordinary	68.4724
PSMB9	ANAPC7	ordinary	167.675
HIST1H2BD	HIST4H4	ordinary	52.5766
PIK3CD	CYFIP2	redundant	335.454
PIP5K1A	REPS2	ordinary	21.6969
CACNA1D	CD209	ordinary	15.6395
PSME3	AJUBA	redundant	74.0315
DAB2	ARPC3	ordinary	64.1079
EZH2	H3F3B	ordinary	154.054
GLYAT	ACSM2A	ordinary	119.335
DDAH1	ASS1	ordinary	301.97
DVL2	NCK1	redundant	104.656
CAMK2G	MDM2	redundant	99.525
BTC	FYN	ordinary	166.052
FAM20C	IL6	redundant	20.0586
PIP5K1C	PDGFRB	redundant	113.642
TPR	HSPA4L	ordinary	52.6441
RAP1GAP	RAP1A	ordinary	157.71
GNA14	DGKI	ordinary	54.1614
FGFR4	FCGR2A	ordinary	108.01
HSPA8	SNX9	ordinary	58.2452
STIM1	ANXA1	ordinary	92.2184
ARHGAP17	RHOF	ordinary	106.396
SLC8B1	GRIK3	ordinary	158.401
AGPAT1	LPIN3	ordinary	68.4908
ALS2	GDI2	ordinary	35.8827
HLA-E	CNTRL	ordinary	163.524
GNB4	NCKAP1	ordinary	67.7212
PRKAB2	RRAGD	ordinary	28.294
DCAF6	CUL4B	ordinary	29.4833
NDC1	SNUPN	ordinary	19.5973
HIST1H2BK	KDM4A	ordinary	34.5408
FXYD6	KCNF1	ordinary	26.0623
AK8	ATP6V1D	ordinary	34.2966
NFYC	GGPS1	redundant	20.1404
CHMP6	UBB	ordinary	87.064
PSMC4	RELA	redundant	35.5273
SLC4A8	BEST1	ordinary	472.43
PIK3CA	FCHO1	ordinary	114.224
AAAS	RAN	redundant	32.992
POLR2J	NELFE	ordinary	102.871
NAA35	ATAT1	ordinary	47.7665
DVL1	PPP2R5E	redundant	57.4926
FGFR4	CYFIP2	ordinary	291.425
AKAP1	NFATC1	ordinary	72.4672
P2RX7	PPP3CA	ordinary	196.113
PIP5K1C	FYN	redundant	144.401
RRAGB	IARS	ordinary	65.2969
PTPN11	BAG4	redundant	125.243
ATP6V1C1	PYGL	ordinary	148.108
TFDP1	SUZ12	ordinary	61.2447
AP2A1	ROR2	ordinary	44.3052
SLC38A5	SLC4A7	ordinary	19.3075
AGBL3	VAMP2	redundant	98.4704
TGOLN2	PIP5K1B	ordinary	107.118
EXOSC8	DDX49	ordinary	118.833
NME1	ATP6V1A	ordinary	80.7572
AK8	ATP6V0B	ordinary	13.1245
TRPC4	MYL9	ordinary	53.9583
SYNJ2	CD4	redundant	109.202
TEX15	RPA1	ordinary	76.338
EXO1	POLK	ordinary	59.1698
TRIO	RHOQ	ordinary	31.6791
EPS15L1	ARPC5	ordinary	117.277
PIP5K1C	CBLB	redundant	98.003
MPC2	PDHA1	ordinary	131.753
MYH15	EXOC3	ordinary	114.985
KAT5	CHEK1	redundant	27.8641
PIP5K1A	NTN1	ordinary	19.8285
CHM	RAB1B	redundant	27.6861
TRPM7	SNAP25	ordinary	89.0201
EPHB1	EFNB2	ordinary	20.8927
DNA2	FEN1	ordinary	80.151
PEBP1	TRIM24	redundant	146.345
SPRED3	HRAS	redundant	47.6124
CHCHD4	CMC2	ordinary	117.961
SUV39H1	HIST1H2BN	ordinary	93.644
POLR2D	MDC1	ordinary	92.6974
ARHGAP25	RHOT1	ordinary	163.983
AAK1	SLC2A8	ordinary	63.971
CLTB	TACR1	redundant	45.9718
INPP5D	GRB2	redundant	174.768
EFNA3	RHOA	ordinary	163.887
PIK3C2B	EPS15	redundant	37.0491
ST3GAL6	SLC35A1	ordinary	44.8464
PSMC1	BUB3	ordinary	25.407
SLC8A1	ATP1A2	redundant	75.1905
CACNA1C	CPLX1	redundant	47.1571
ACTR2	IGF2R	ordinary	46.6662
PSMC3IP	HIST1H4I	ordinary	40.9044
ACOT2	ACAT1	ordinary	149.562
PSMA3	PPP2R5E	redundant	44.4418
EIF5	EIF4E	redundant	116.515
CACNA1D	ACTA2	redundant	24.6189
ARPC1A	TFRC	ordinary	61.4108
SLC38A2	ASNS	redundant	38.5739
EXOSC2	UTP3	ordinary	63.5765
ARPC1A	IGF2R	ordinary	58.7841
FXYD3	SCN4A	ordinary	31.8544
DENND1B	RAB35	ordinary	94.1938
PSMA7	WTIP	ordinary	13.5595
WRN	PARP1	ordinary	21.5572
NEFL	SORBS1	ordinary	25.8881
CALM2	SLC24A4	redundant	119.694
PPP1CB	PER1	redundant	18.4785
STAT4	TALDO1	redundant	111.441
NUP107	PHAX	ordinary	69.0992
CALM1	GRIN2A	redundant	34.2428
PSMB9	NUMB	ordinary	154.977
CCNB2	PPP2R5B	redundant	70.1472
PSMB6	RPS27A	redundant	61.1638
C1QC	C2	ordinary	200.704
CATSPERG	MYL5	ordinary	86.8027
NDC1	HDAC4	ordinary	43.3707
ARHGAP18	CDC42	ordinary	27.3856
IRS1	FGF2	ordinary	39.6363
2020-09-02	HAUS7	ordinary	87.2321
TRAT1	VAV3	ordinary	171.7
PSMA6	NPEPPS	ordinary	21.8083
LGMN	HLA-DRB1	redundant	79.2926
SPCS1	SSR1	ordinary	68.2592
PIP5K1B	CD86	redundant	187.274
HDAC2	H2AFJ	ordinary	51.5293
PSMC1	NFKB2	redundant	92.0999
GABPA	POLG2	ordinary	72.1678
PSME2	GLI3	redundant	33.5013
SLC17A1	SLC9A6	ordinary	43.7113
ACSS2	HMGCS1	redundant	86.1604
CD79B	DAPP1	ordinary	48.6798
GSS	GSTM3	ordinary	444.125
KIF15	HLA-DPB1	ordinary	145.541
PSMD3	RELA	redundant	86.6957
LIAS	MARS2	critical	18.7638
SKP1	AURKA	ordinary	44.296
MAPK1	L1CAM	redundant	94.2672
ARHGEF39	RHOA	ordinary	262.286
FGF2	LCK	ordinary	39.168
CAMK2D	NFATC3	redundant	43.4931
ZMYM2	BAIAP2	ordinary	19.9025
RRAGA	AIMP1	ordinary	14.431
SRI	LMOD1	redundant	13.0719
BLM	FAAP24	ordinary	208.072
PIK3R5	SH3KBP1	redundant	252.483
RAB3GAP1	BICD2	ordinary	65.5077
CRTAP	COL1A2	ordinary	59.9603
ORAI1	PPFIA1	ordinary	44.3495
PPAT	GCLM	ordinary	61.864
PNPLA3	AQP3	ordinary	194.946
ARFGAP1	RAB1A	redundant	57.0803
SRM	SAT1	redundant	45.8173
PYGO1	H2AFZ	ordinary	82.9809
CCNB2	CENPL	ordinary	221.471
LAMA2	HGF	ordinary	45.8314
PSMB3	CDC27	ordinary	42.3612
XRCC1	UBC	redundant	116.465
PIP4K2C	PDGFRB	redundant	305.376
ATP2B1	TLN1	ordinary	31.2085
STX1A	CACNA1F	ordinary	70.1536
ACLY	FASN	ordinary	105.405
DHCR24	SCAP	ordinary	120.468
CUX1	RHOA	ordinary	13.5908
TNFAIP3	RNF31	ordinary	85.5629
ASPH	ANXA6	ordinary	21.0776
KITLG	FGF7	redundant	115.414
IMPA1	MIOX	ordinary	61.0994
NBN	FANCD2	redundant	21.8495
MTMR3	PITPNM3	ordinary	148.162
TRAF6	NCKAP1	redundant	118.142
TRPM6	MYL3	ordinary	242.301
ARHGEF10L	RHOB	ordinary	36.8146
SPCS1	SEC61B	ordinary	102.948
PSME4	TRAF2	redundant	87.1655
EED	H3F3A	ordinary	33.3287
USP1	FANCM	redundant	81.5582
IDH3G	AADAT	ordinary	22.9607
BRCA1	UBE2I	redundant	106.412
GSK3B	TAF1A	redundant	30.3437
CALM1	ATP2B2	ordinary	92.8427
LCK	PDCD1	redundant	285.759
FAM13B	RHOB	ordinary	29.3022
TRAPPC13	RAB1B	ordinary	21.4142
AGPAT3	PLA2G6	redundant	47.2813
CAPN1	CDH1	ordinary	92.1869
CNGA1	PYGL	ordinary	259.539
PIP5K1B	KIAA0319	redundant	148.641
ICOS	FGFR1OP	ordinary	153.638
PPARG	PCK1	ordinary	92.6017
CCDC22	UBE2F	ordinary	16.2047
TRPC1	PXN	ordinary	43.2066
PIP5K1A	WASF3	redundant	151.3
GNGT1	PDPK1	ordinary	59.4926
CASP6	VIM	redundant	229.391
PGM2	SLC37A4	ordinary	59.2631
PIK3CA	PACSIN3	ordinary	32.3988
DVL3	LCP2	redundant	170.512
CS	ACSM2A	redundant	20.3191
BOP1	UTP3	ordinary	43.8554
KSR2	MAP2K1	ordinary	164.81
NBN	RPA3	redundant	19.577
HADHB	CS	ordinary	151.054
BTC	SOS1	ordinary	108.316
PSMC3	BIRC3	redundant	106.192
PLCB2	DGKD	ordinary	264.808
PRKCE	SHC1	ordinary	147.445
PSMA5	FBXL7	redundant	31.2688
POLR2K	HIST1H4I	ordinary	38.0339
MCRS1	COPS2	ordinary	58.0486
ITPR1	RASGRF2	ordinary	49.8177
CALM2	NFATC3	redundant	16.4515
GALNT15	MUC12	ordinary	95.79
PSME3	LTB	ordinary	99.3323
PSMA3	OAZ1	ordinary	22.3051
FAM20C	SDC2	redundant	12.6428
SLC5A12	DLG4	ordinary	42.3298
MOV10	NOTCH4	ordinary	83.5162
PAFAH1B1	DYNC1H1	ordinary	117.89
DVL2	LDLRAP1	redundant	76.6352
SULT1C2	BPNT1	ordinary	59.2295
CPT1A	ACSL6	ordinary	136.499
RPS11	RRP7A	ordinary	77.9368
RAB3A	SLC1A3	ordinary	139.998
SNX18	EGFR	ordinary	149.773
ALG3	ALG9	redundant	36.0676
ELOVL7	HSD17B12	ordinary	114.785
PTGDR	GNAS	ordinary	91.5407
RABGGTB	RAB27B	ordinary	30.9521
MMP15	NID1	critical	70.66
FGFR3	FCGR2A	ordinary	122.42
AGPAT2	ACSL5	ordinary	24.8603
RPS13	TBL3	ordinary	51.9617
BARD1	MNAT1	ordinary	36.3708
PRKAA2	ULK1	redundant	61.5935
CAMK2G	GNAI1	redundant	156.295
RAD51C	RAD51	ordinary	160.713
AGPAT5	LPIN1	redundant	65.4503
ARRB1	VAMP2	ordinary	50.7453
DNAJB1	HSPA2	ordinary	538.758
TPCN2	ACTG2	ordinary	59.6176
CALM2	P2RX4	ordinary	99.6369
HLA-E	MYO18A	ordinary	129.831
PIP5K1A	PIK3AP1	redundant	26.9795
TOMM5	PINK1	redundant	43.0805
RUNX3	TEAD4	ordinary	159.779
PTK6	KHDRBS3	ordinary	28.3958
PSMD13	SPOPL	ordinary	90.5237
COPS6	ASB6	ordinary	33.6421
ACOT1	AACS	ordinary	77.8394
MYO9B	RAC1	ordinary	140.997
PLCD4	DGAT2	ordinary	28.9331
OPLAH	TTLL1	ordinary	36.3605
GNAI1	STIM1	redundant	134.937
SRGAP2	RHOG	ordinary	103.062
CATSPER2	SLC8B1	ordinary	37.4156
ARRB2	CD3G	ordinary	302.771
PPP1CB	CRY1	ordinary	39.8906
GNG2	FGFR3	ordinary	56.8272
CALM3	PDE4A	ordinary	74.8411
BRCA1	POLH	ordinary	103.399
GAB2	LCK	ordinary	45.7677
RPS27A	INPP4B	redundant	42.461
DMAP1	HIST3H2A	ordinary	46.6183
ITPR2	PRKCZ	ordinary	108.076
PSMC4	CUL1	redundant	28.2217
NEDD8	UBE2M	ordinary	127.826
TNKS2	AXIN1	ordinary	65.2478
UBE2N	TLR4	redundant	22.7571
PIP5K1A	PLCE1	ordinary	55.961
SLC4A8	SLC6A13	redundant	391.853
MAP2K2	KDM7A	ordinary	64.5979
MYD88	FGFR4	ordinary	33.3389
DCTN1	NR3C1	ordinary	55.9776
COASY	ACSL4	ordinary	227.334
RYR3	PPFIA3	ordinary	25.323
SLC3A2	FXYD2	redundant	65.4133
CALM1	INPP5D	redundant	144.408
VPS4A	PPIA	redundant	44.499
CLTA	IGF2R	redundant	16.5009
PIK3CA	INPP4B	redundant	74.0099
HGF	TEC	ordinary	24.8051
PRMT5	H2AFX	redundant	44.0916
NUP85	GEMIN2	ordinary	129.023
GMPR	ADSSL1	ordinary	201.304
SLC1A3	NICN1	ordinary	238.065
ATP1A1	GNB2	ordinary	588.435
PSMD3	RBX1	redundant	37.4662
CACNB3	TRPM3	ordinary	61.9942
ST3GAL2	MUC12	ordinary	145.392
ARHGEF35	RHOJ	ordinary	58.2737
KLC1	HLA-DQB2	ordinary	109.913
PSMD7	CDC20	ordinary	90.604
CACNA2D1	ATP2C1	ordinary	40.261
CAMK2D	IFNGR2	ordinary	138.774
EXOSC8	EMG1	ordinary	137.615
DLG3	SLC24A4	ordinary	148.426
CFB	C5	ordinary	130.037
CCNB1	AHCTF1	ordinary	30.305
PRKAG2	LAMTOR1	ordinary	24.2914
COPS7B	KLHL2	ordinary	121.389
RHOB	MYH11	redundant	27.1558
FOLH1	TTLL7	ordinary	41.4462
FGFR3	ITK	ordinary	84.7003
CNDP2	TTLL3	redundant	81.5215
CYBRD1	CP	redundant	70.8374
P2RX7	SNAP25	ordinary	250.115
CTSC	HLA-DRA	ordinary	129.037
HMOX1	BLVRB	ordinary	127.073
PIK3CA	ACTR3	redundant	92.7385
RBX1	HIF3A	redundant	12.972
TRPC6	ATP2A2	ordinary	25.8824
CD79A	ITPR3	ordinary	27.7408
ITPR2	MYH11	ordinary	69.2441
CAMK2D	ACTG2	redundant	23.364
FGF2	INPPL1	ordinary	17.7071
PIP4K2C	PIK3C3	ordinary	274.643
XRCC1	RFC5	ordinary	46.2951
PIP4K2B	TEC	redundant	34.603
TRPM3	CALM2	ordinary	42.0196
STX1A	GRIN2A	redundant	32.4435
CPSF6	GRAP2	ordinary	87.968
GNAI2	STIM1	redundant	90.5457
LDLR	CD3G	ordinary	110.968
GLA	GLB1	ordinary	106.407
ATP6V0A1	SLC25A10	ordinary	53.0628
UBA52	CD3D	redundant	125.332
ITPR3	CPLX1	ordinary	36.3399
AK7	GNAL	redundant	121.885
MAP2K4	MAPK8	redundant	98.3477
MID1IP1	ELOVL5	redundant	81.228
PIP5K1B	MTMR1	ordinary	89.401
GNG11	SYNJ1	ordinary	51.9508
GCAT	GARS	ordinary	36.6126
CACNB2	STX1A	redundant	19.7384
AKT1	RPTOR	ordinary	16.1244
HSP90AA1	BAG4	redundant	145.815
ENPP1	ACP5	critical	49.6715
HSP90AA1	TDRKH	ordinary	148.475
KCNK9	ATP1A2	ordinary	100.992
GUCY1A3	PDE6G	redundant	66.8178
SKIV2L2	DIEXF	ordinary	110.993
SETD1A	ITGA2B	ordinary	36.9942
COPS4	DCAF16	ordinary	47.0872
BCR	CYFIP2	ordinary	417.636
UBB	BRCA1	redundant	64.0198
RPS5	RCL1	ordinary	53.9314
NUPL2	CPSF2	ordinary	41.8418
DVL1	FGF2	redundant	26.4466
PDGFRA	FGFR1	ordinary	92.3707
NUP88	GEMIN7	ordinary	93.0242
TGS1	SLC27A1	ordinary	100.666
P4HA2	COL5A1	ordinary	104.581
TREM2	PDPK1	ordinary	221.267
DVL3	LAT2	redundant	143.719
ARFGAP3	TMED10	ordinary	34.7943
TRPV4	NFATC1	ordinary	40.3759
CASP3	GAS2	redundant	46.4744
CATSPERG	RASGRP1	ordinary	32.1481
LEF1	HIST1H3H	ordinary	72.7143
KCNQ3	ATP1B1	ordinary	150.569
P2RX1	SLC8B1	ordinary	22.8342
NDC80	STAG2	ordinary	114.636
CDK11A	PAFAH1B1	ordinary	71.0795
SLC1A1	LRRC49	ordinary	17.8402
IGF2R	MYO10	ordinary	74.0318
TCIRG1	SLC25A5	ordinary	122.956
PPFIA3	VAMP2	ordinary	48.298
GPSM2	CCR5	ordinary	114.695
SLC28A1	FXYD2	ordinary	48.6301
CACNA2D4	RASGRP2	ordinary	88.3716
BLNK	DGKH	ordinary	98.212
AKT2	PDE3B	ordinary	27.2427
MAPK1	SPRY2	redundant	26.1778
SLC6A20	KARS	ordinary	17.1448
POLH	XRCC2	ordinary	109.521
VAMP8	ARPC5	redundant	81.0762
CNOT6	PAIP1	ordinary	34.1816
PTEN	HGS	ordinary	36.4849
ORAI2	CACNB3	ordinary	30.0122
PSMD6	ANAPC11	ordinary	54.8349
EPHA1	EFNA5	ordinary	100.604
POLR2L	H2AFJ	ordinary	156.158
DVL2	IGF2R	redundant	29.5019
RBBP5	H2AFV	ordinary	108.991
GTF2H1	NCBP1	ordinary	89.5422
COPS7B	FBXL3	ordinary	74.4999
ALS2	RAB5C	ordinary	86.8152
GNA11	INPP5B	ordinary	30.1427
PI4K2A	SYT9	redundant	39.7023
[truncated: 70,745 more rows]

## Sheet: KIRP
node1	node2	edge_type	activity
[truncated: 59,376 more rows]

[truncated: 8 more sheets: LIHC, LUAD, LUSC, PRAD, READ, STAD, THCA, UCEC]
