# Supplementary material for: Conserved Control Path in Multilayer Networks
Source: Entropy (Basel). 2022 Jul 15;24(7):979. doi: 10.3390/e24070979 (PMC9324794; doi:10.3390/e24070979)
Supplement: Supplementary file 1 [file entropy-24-00979-s001.zip › Supplementary Data 2.xlsx]

## Sheet: BLCA
gene1	gene2	type
SQLE	LSS	critical
NHLRC1	EPM2A	critical
SP1	ACACB	critical
HIPK2	CBFB	critical
ITGA4	ITGAL	critical
RARRES3	PNPLA7	critical
XPO1	MAPK6	critical
GART	PFAS	critical
RPS6KA5	ATF1	critical
HLCS	ACACA	critical
ITGAL	ITGA4	critical
GIT1	MYL12A	critical
SMAD4	CDKN2B	critical
SMAD7	KEAP1	critical
FOXM1	CENPF	critical
EEF1A2	EEF1A1	critical
TRIM21	DDX41	critical
ABAT	ALDH5A1	critical
PDCD6IP	ANTXR2	critical
PNP	XDH	critical
PCK2	SLC25A1	critical
NPL	MPC1	critical
PGAM5	FUNDC1	critical
PGAM1	ENO1	critical
APIP	ENOPH1	critical
NUDT4	PPIP5K1	critical
NSDHL	HSD17B7	critical
BTC	ERBB2	critical
DPAGT1	ALG14	critical
SEPHS2	SEPSECS	critical
TJP1	GJA1	critical
NFYA	GPAM	critical
STRADA	PRKAB1	critical
TIGAR	PFKM	critical
CYP51A1	MSMO1	critical
CUL5	CDC37	critical
SIRT3	SOD2	critical
SLC25A1	ACO1	critical
SLC19A2	TPK1	critical
GBA	ASAH1	critical
GAPDH	TALDO1	critical
CHEK1	WEE1	critical
SLC52A2	RFK	critical
ALAD	HMBS	critical
GALT	GALE	critical
HMGCS1	HMGCR	critical
SRM	DHPS	critical
SORD	XYLB	critical
CS	ACO2	critical
CP	HEPH	critical
TSTA3	SLC35C1	critical
ITGB3BP	MAPK8	critical
FOXO3	BCL2L11	critical
ITGAV	KDR	critical
MPDU1	ALG6	critical
P4HB	IL23A	critical
PIGB	PIGF	critical
PIGF	PIGU	critical
CEBPB	EBF1	critical
PIGL	PIGW	critical
XIAP	TLE4	critical
EBP	SC5D	critical
PECR	PHYH	critical
RBPJ	GZMB	critical
ABCB7	HMOX1	critical
SH2B1	GHR	critical
DDIT4	YWHAG	critical
MBTPS2	ATF6	critical
ABHD6	AQP3	critical
ADAM9	COL17A1	critical
ACSL3	SPTLC1	critical
EPHB6	EFNB1	critical
CDC25B	CDK2	critical
RNF43	FZD8	critical
SLC36A4	TDO2	critical
MAPK10	JUN	critical
FZD1	PPP2R5D	critical
FZD7	PARD6A	critical
SRD5A3	DOLK	critical
MADD	RAB27A	critical
AZIN2	AGMAT	critical
PRODH	PYCR1	critical
CPOX	PPOX	critical
BAP1	HCFC1	critical
ATF2	MSH2	critical
MOCS2	GPHN	critical
ALG12	ALG9	critical
SLC38A1	SLC38A2	critical
OSBPL8	SACM1L	critical
KBTBD7	SPRED2	critical
CHKB	PCYT1A	critical
NMRAL1	ASL	critical
CHUK	NFKBIE	critical
ACAT1	HMGCS2	critical
ACAT2	HMGCS1	critical
CISH	IL2RG	critical
RNF152	RRAGA	critical
MCAT	NDUFAB1	critical
SLC27A2	AMACR	critical
IL2RA	IL2RB	critical
EBI3	IL6ST	critical
MLX	AGPAT1	critical
SLC25A28	NFS1	critical
PTGES3	CBR1	critical
ECHS1	HADH	critical
CYP7B1	HSD3B7	critical
RFK	FLAD1	critical
CHAC1	CNDP2	critical
ADHFE1	D2HGDH	critical
SKP1	BTRC	critical
CFD	CFB	critical
ABCB10	FLVCR1	critical
CRK	KIDINS220	critical
LIAS	MARS2	critical
PRKCD	IFNGR2	critical
PRKCZ	SPHK1	critical
TYMS	DHFR	critical
SAE1	UBA2	critical
TPI1	GPD1L	critical
PNPLA2	AQP7	critical
CYP4F11	CYP4F3	critical
SH2D2A	AXL	critical
AP2S1	GRIP1	critical
CYP4F3	CYP4F11	critical
PNPLA7	GDPD5	critical
PIAS4	MTA1	critical
ATG12	ATG10	critical
ATG13	AMBRA1	critical
MAN2A1	MGAT2	critical
LIPT2	GCSH	critical
LIPT1	DHTKD1	critical
IL1B	MAP3K3	critical
CAST	CDK5R1	critical
PPCDC	COASY	critical
MTR	FPGS	critical
RRM2	GLRX	critical
SLC44A1	CHDH	critical
SLC44A2	SLC44A1	critical
CPT1B	SLC25A20	critical
SLC44A4	CHKA	critical
SULT2B1	BPNT1	critical
AMACR	ACOX2	critical
MLYCD	ACOT8	critical
PYGB	PGM1	critical
PYGL	UGP2	critical
TRAPPC3	RAB1B	critical
RNF4	UIMC1	critical
HSD3B7	PTGIS	critical
EPM2A	GYG2	critical
PGM3	UAP1	critical
ELOVL7	HSD17B12	critical
MAPK9	ATF2	critical
IDUA	SGSH	critical
STAT5B	BRWD1	critical
XYLB	PPP2R1B	critical
PMVK	MVD	critical
DECR1	ECI1	critical
ADAM17	BTC	critical
USP19	RNF123	critical
ECE2	EDN1	critical
HMBS	UROS	critical
PAPPA	IGFBP5	critical
CDKN1C	TFDP2	critical
HSCB	ISCA2	critical
MST1	MST1R	critical
PAICS	ADSL	critical
OGDH	GCDH	critical
MTHFD1L	MTFMT	critical
TBC1D25	RAB33B	critical
ALG11	RFT1	critical
ALG14	ALG1	critical
MTFMT	MTHFD1L	critical
EGFR	SPRY1	critical
CAT	NUDT12	critical
ACADM	DECR1	critical
NLRC5	IFIH1	critical
BTD	SLC5A6	critical
IMPDH1	GMPS	critical
COX10	COX15	critical
ENOPH1	ADI1	critical
PGS1	PTPMT1	critical
PROS1	F5	critical
MIB1	JAG1	critical
ATP7A	ATOX1	critical
HYKK	PHYKPL	critical
MTHFD2	MTHFD2L	critical
MTHFD1	MTHFR	critical
RPS6KB1	EEF2K	critical
ADSL	ATIC	critical
NAE1	UBA3	critical
RALGDS	RALB	critical
GNB5	PDE6B	critical
NUDT14	PGM2	critical
TSPO	FDXR	critical
PUM2	DCUN1D3	critical
TGFB1	ZFHX3	critical
ST8SIA4	NCAM1	critical
TSLP	IL7	critical
RPE	PPP2CA	critical
AURKA	PHLDA1	critical
ABCC1	TCN2	critical
CERK	CPTP	critical
IL12RB1	STAT4	critical
JAK3	IL4R	critical
PLD1	CHKB	critical
HEPH	LCN2	critical
RBX1	NF1	critical
EPHB2	TIAM1	critical
EPHB4	EFNB2	critical
CDC14B	CCND3	critical
NAMPT	NMNAT2	critical
ACACA	ELOVL7	critical
KYNU	HAAO	critical
CASP1	IL18	critical
MAN2B2	MANBA	critical
GLRX3	ALAD	critical
CAPN1	CDH1	critical
MYC	MAPKAPK5	critical
ENTPD3	ENTPD1	critical
ENTPD1	ENTPD3	critical
SERPINB6	PLAU	critical
FBXL5	IREB2	critical
GNS	HEXA	critical
GNPNAT1	PGM3	critical
TLR4	IRAK2	critical
AFMID	KMO	critical
PDSS1	COQ2	critical
DDB2	XPC	critical
UNC13B	SLC1A1	critical
ACHE	SLC44A2	critical
SLC25A37	ISCU	critical
RIN2	RAB5C	critical
ARHGEF28	LIMK2	critical
PCCA	MCEE	critical
STEAP3	MCOLN1	critical
PSEN2	EPHB2	critical
NAGS	ACSF3	critical
GGT6	DLG3	critical
ABCC3	FABP6	critical
ADK	CMPK1	critical
N6AMT1	ETF1	critical
APRT	LHPP	critical
GRB10	INSR	critical
HSD17B12	SRD5A1	critical
GSTZ1	FAH	critical
UROS	UROD	critical
AMD1	SMS	critical
ABCA1	CPNE1	critical
MCCC2	AUH	critical
MCCC1	CA5B	critical
GPX2	GSR	critical
POLQ	PARP1	critical
SMS	SAT1	critical
POLB	PARP2	critical
ASPG	PAICS	critical
MVD	IDI1	critical
BPHL	VARS	critical
F5	F8	critical
ABCA3	ADRA2A	critical
RFT1	ALG3	critical
ABCA9	LCAT	critical
PPFIA3	ARL6IP5	critical
ECI1	MECR	critical
CHMP5	CHMP3	critical
ELOVL5	FADS1	critical
HGS	STAM2	critical
HGF	CBL	critical
CLU	C7	critical
MPC1	PC	critical
GNPDA1	MPI	critical
HPS4	RAB32	critical
SLC25A11	VHL	critical
FGR	LRP8	critical
PLBD1	MBOAT7	critical
HPSE	IDUA	critical
DDAH1	ASS1	critical
ALG9	ALG12	critical
CYB5R3	CYB5A	critical
CYB5R2	SLC40A1	critical
ALG3	MPDU1	critical
ALG6	ALG8	critical
TIRAP	IRAK4	critical
CSK	PDCD1	critical
HDAC4	RUNX3	critical
ACADS	ECHS1	critical
SLIT2	ROBO1	critical
C1QBP	F12	critical
BACE1	APP	critical
HIF1A	RORA	critical
NEU1	SLC17A5	critical
CEBPD	KLF5	critical
GMDS	TSTA3	critical
SLC1A5	CAD	critical
PHYH	HACL1	critical
GGT5	DLG1	critical
USP47	POLB	critical
TOMM40	PINK1	critical
IDH1	LIMD1	critical
SLC25A22	GLUD1	critical
SLC25A20	CPT1B	critical
MDM2	DYRK2	critical
MDM4	JMY	critical
MTF1	CSRP1	critical
KPNA1	PSIP1	critical
SUMF2	ARSB	critical
IFNAR2	IFNAR1	critical
PC	PCK2	critical
GNL3	WDR18	critical
GALK1	GALT	critical
DOHH	EIF5A	critical
HBEGF	GPNMB	critical
CYP27B1	CYP24A1	critical
MTMR7	FIG4	critical
LSS	CYP51A1	critical
MICU1	SLC8B1	critical
MINK1	MAP3K5	critical
NRG1	ERBB3	critical
PKN1	PPP1R14A	critical
SUCLG1	SDHC	critical
PHGDH	PSAT1	critical
GOLGA2	GORASP1	critical
SERPINB8	SERPINB2	critical
ENPP1	ACP5	critical
FDPS	GGPS1	critical
HMOX1	FTL	critical
IDS	HEXB	critical
PDXK	PNPO	critical
NPM1	NOP2	critical
OTUB1	RNF128	critical
SREBF2	FDFT1	critical
ABHD14B	SULT1A1	critical
PLAT	PDGFD	critical
CHAC2	OPLAH	critical
RPIA	PRPS2	ordinary
TKT	GPI	ordinary
LTBR	TRAF3	ordinary
AGPAT2	PLA2G2A	ordinary
HDAC6	MID1IP1	ordinary
PSMD1	CUL3	ordinary
ANAPC16	FZR1	ordinary
PCF11	INTS3	ordinary
DVL2	HGS	ordinary
PIK3R4	PIKFYVE	ordinary
PSMB3	REL	ordinary
GNAI2	CD209	ordinary
PRKACA	PDE4B	ordinary
SMARCD3	SLC27A1	ordinary
MET	MYO18A	ordinary
FCGR1A	CUX1	ordinary
CLOCK	CRY1	ordinary
ITPR2	STIM1	ordinary
VDAC2	MICU1	ordinary
AKAP9	SLC24A1	ordinary
CLIC2	ANXA2	ordinary
GMPS	TPGS1	ordinary
BCAT1	EGLN1	ordinary
FCHO1	ACTR3	ordinary
AP2M1	FZD5	ordinary
LIN7B	PPFIA3	ordinary
STX1A	TRPC4AP	ordinary
INPP5K	EPN2	ordinary
SNX18	ADRB2	ordinary
PSMD14	WTIP	ordinary
NCL	BMS1	ordinary
EXOSC3	NOL6	ordinary
KLRD1	FCGR2A	ordinary
FGFR1OP2	ABI1	ordinary
HRAS	MACF1	ordinary
MTMR14	PI4KA	ordinary
AHCYL1	TMOD3	ordinary
DLG4	PPP3CB	ordinary
CHMP4C	GABARAPL1	ordinary
RPS27A	POLD2	ordinary
H2AFZ	NCAPH2	ordinary
EHMT2	TBP	ordinary
WNT5A	FZD2	ordinary
ULK1	ATG14	ordinary
CACNA2D2	CACNA2D1	ordinary
IL33	BRK1	ordinary
FGFR4	CYFIP2	ordinary
SPCS2	SEC61G	ordinary
RPS3A	TBL3	ordinary
COPS2	FEM1B	ordinary
ARL2BP	ADCY9	ordinary
ATP6V0E2	TSPAN7	ordinary
RPS8	RPS9	ordinary
SEPT2	PLK4	ordinary
CSNK1E	DVL1	ordinary
BCR	BAIAP2	ordinary
EPN1	CLTB	ordinary
TREM2	BCR	ordinary
CNTRL	SOS1	ordinary
HMGCR	MVK	ordinary
AASDHPPT	FASN	ordinary
APP	SORBS1	ordinary
AXL	INPP5K	ordinary
SHC1	TRPC1	ordinary
GNB4	CACNA1D	ordinary
NMT2	ACSS2	ordinary
MORC2	NAA30	ordinary
PSMD7	GTSE1	ordinary
LTB	BIRC3	ordinary
SEC11A	RPS17	ordinary
ATP1B3	SCN4B	ordinary
GPT2	ALDH18A1	ordinary
DLD	SUCLA2	ordinary
ADCY1	PDE4D	ordinary
FCGR3A	GRB2	ordinary
MBOAT2	PTDSS1	ordinary
PLA2G6	CYP2U1	ordinary
HLA-DQA1	LCK	ordinary
DLG3	SLC8A1	ordinary
RPS28	UTP14C	ordinary
PRKG2	KCNMB1	ordinary
PSMD6	SKP2	ordinary
ATP1A4	KCNE4	ordinary
FECH	COX10	ordinary
ABCB8	HMOX2	ordinary
RPS27L	DCAF13	ordinary
RBM28	UTP6	ordinary
TRPM2	ANXA1	ordinary
PIK3CD	NECAP2	ordinary
SLC8B1	P2RX4	ordinary
CATSPERG	ITGA1	ordinary
NUP35	GEMIN6	ordinary
PSMB8	TNFSF13B	ordinary
RRP1	NOP58	ordinary
PSMB7	ANAPC2	ordinary
RELB	NFKB2	ordinary
SLX4	DNA2	ordinary
WRN	REV3L	ordinary
GNA11	DAGLA	ordinary
CHML	RAB23	ordinary
RIPK2	CARD11	ordinary
GLE1	NUP214	ordinary
NUP107	CPSF1	ordinary
PIK3R2	SNX18	ordinary
AAK1	ACTR2	ordinary
PSMD9	ANAPC5	ordinary
TNFRSF1B	MAP3K14	ordinary
ACTR3	VAMP2	ordinary
VAMP7	SH3D19	ordinary
IKBKB	CYLD	ordinary
NFKB1	IL1B	ordinary
PSMC2	CUL2	ordinary
IRS1	FGFR1OP	ordinary
LCP2	BTK	ordinary
POM121	KPNB1	ordinary
RPS13	RRP9	ordinary
TRPC4AP	ITGB5	ordinary
LRP8	GPC3	ordinary
SUCLA2	SLC27A3	ordinary
ORMDL1	ATAT1	ordinary
CLCN6	ANO8	ordinary
SLC12A7	SLC12A2	ordinary
PSMA1	LTB	ordinary
PSMC3	TNKS2	ordinary
WDR35	PDE3A	ordinary
IL1RAP	SHC1	ordinary
PDPK1	RPS6KA3	ordinary
TFRC	PLEKHA2	ordinary
HADHA	ACADM	ordinary
PSMD2	CKS1B	ordinary
EIF1AX	RPS4X	ordinary
ITSN2	INPP4A	ordinary
ARPC5	VAMP4	ordinary
MCOLN2	MYH11	ordinary
ANK3	TMED7	ordinary
ORAI1	MYL6	ordinary
PPAT	SLC7A11	ordinary
PRKCQ	GNB5	ordinary
CA13	AQP1	ordinary
RRAGA	SLC7A7	ordinary
UBE2M	FBXW11	ordinary
GAB2	FGFR1OP2	ordinary
SYK	NCK1	ordinary
SEC24D	SEC31A	ordinary
SLC25A6	MB21D1	ordinary
ATP6AP1	SLC25A6	ordinary
PSMA3	CDC26	ordinary
ITK	INPP5B	ordinary
PRKCE	GNAZ	ordinary
CHRNA5	VDAC2	ordinary
ACOT13	HDAC8	ordinary
NUP43	KPNA5	ordinary
VAV1	PLCG2	ordinary
CALM3	IQGAP2	ordinary
SOS1	PIK3R1	ordinary
FGFR2	FGF2	ordinary
CACNB1	ATP2A1	ordinary
RAB3IL1	RAB3A	ordinary
L2HGDH	DLST	ordinary
AASS	BCAT2	ordinary
SLC35A3	MGAT4B	ordinary
B3GNTL1	MUC20	ordinary
TRPV3	MYH3	ordinary
GNG4	CACNA2D2	ordinary
TEC	PRKCA	ordinary
HIP1	IGF2R	ordinary
COPS8	KLHL5	ordinary
SUMF1	ARSD	ordinary
CBLB	DGKI	ordinary
CA2	ATP6AP1	ordinary
TCIRG1	NME1	ordinary
ATP6V0A1	DTYMK	ordinary
KAT2B	HES1	ordinary
B3GAT3	GPC4	ordinary
AQP3	CD38	ordinary
PNPO	DPH6	ordinary
PRDX1	TXN	ordinary
GNB1	DGKA	ordinary
AKAP1	TPM2	ordinary
RPA2	HSPA1L	ordinary
RRAGD	EPRS	ordinary
XRCC1	PRPF19	ordinary
GTF2H3	POLR2J	ordinary
DVL1	PLCB3	ordinary
GNB2	CACNB2	ordinary
HIST1H2AC	HIST1H3H	ordinary
CDC42	RCC2	ordinary
MTA1	TAF1C	ordinary
MMP2	SCUBE3	ordinary
LRP1	SDC3	ordinary
PSMA4	OAZ2	ordinary
TULP3	PDE7A	ordinary
FNBP1L	SCARB2	ordinary
SCARB2	INPP4B	ordinary
GPLD1	NEGR1	ordinary
SYNJ2	MTMR6	ordinary
PIK3CG	PACSIN3	ordinary
D2HGDH	ADHFE1	ordinary
PIP5K1B	NTN1	ordinary
RABGGTB	RAB17	ordinary
PSMC6	CDC27	ordinary
AADAT	EARS2	ordinary
STAM2	EPS15	ordinary
PIP5K1A	GNAO1	ordinary
FGFR1OP	INPPL1	ordinary
YWHAB	FAM114A2	ordinary
AAAS	SNRPE	ordinary
HSPA8	AP3B1	ordinary
ZMYM2	FGFR3	ordinary
PSMD11	BLMH	ordinary
COPS3	LRR1	ordinary
DCUN1D5	UBE2F	ordinary
DDX58	IRF7	ordinary
COLGALT1	COL6A2	ordinary
ADCY3	AKAP5	ordinary
MSRB2	MAT2A	ordinary
KITLG	SH2B2	ordinary
CROT	ACAA1	ordinary
RUNX1	NR4A3	ordinary
INO80D	COPS7B	ordinary
RAB43	GCC1	ordinary
PAPSS1	SLC35B2	ordinary
MAP2K1	PAPD7	ordinary
AGFG1	ARPC2	ordinary
SUPT16H	ATM	ordinary
ATM	POLK	ordinary
SLC1A1	TTLL11	ordinary
NRAS	KIAA1549	ordinary
TRPC6	DYSF	ordinary
NEDD8	BIRC5	ordinary
DHCR24	SREBF2	ordinary
NCOA2	ACOX1	ordinary
GPSM2	S1PR1	ordinary
ACTR2	VAMP7	ordinary
TPCN2	LMOD1	ordinary
PLCD3	ITPKC	ordinary
SLC39A1	S100A9	ordinary
DYNC1H1	HSP90AA1	ordinary
UBE2D3	TLR4	ordinary
RACGAP1	HLA-DQA2	ordinary
SBF1	PITPNM1	ordinary
PLA2G4C	LPCAT4	ordinary
RAB8A	EXOC7	ordinary
NUP153	CPSF2	ordinary
VAV3	ITPR1	ordinary
CACNA2D4	SORBS3	ordinary
STXBP1	DNAJC5	ordinary
TRPV6	DES	ordinary
DIAPH2	CENPE	ordinary
COPS5	COMMD5	ordinary
NFYB	DDIT3	ordinary
AGTPBP1	TPGS2	ordinary
GNAS	PRKAR2B	ordinary
SLC2A8	ARPC1B	ordinary
PSME4	ANAPC1	ordinary
PACSIN2	TGOLN2	ordinary
DNM2	AP2A1	ordinary
AP2A1	ROR2	ordinary
NUP58	KPNA3	ordinary
GFPT1	GNPNAT1	ordinary
GOT1	SLC25A13	ordinary
SUPT5H	SNAPC4	ordinary
CDK7	TAL1	ordinary
HIST1H2BN	EYA3	ordinary
TOMM5	TIMM22	ordinary
COPS6	FBXO32	ordinary
GNG2	CACNA1C	ordinary
GBF1	COPB2	ordinary
MCRS1	RAD23A	ordinary
GATAD2A	PML	ordinary
MAP2K3	MAPKAPK3	ordinary
MAPKAPK3	CBX6	ordinary
MPHOSPH6	NOL11	ordinary
KDSR	CERS6	ordinary
PLD6	TRIAP1	ordinary
ERBB3	FGFR4	ordinary
FXYD3	SCN1B	ordinary
ERBB2	PLXNB1	ordinary
RHOC	PPP1R12B	ordinary
ADCY6	PDE8A	ordinary
RAPGEF4	RAP1A	ordinary
NBN	TCEA1	ordinary
VAMP4	ARPC5	ordinary
ACOT7	ACSL1	ordinary
INPP5J	PIK3R3	ordinary
ARRB2	PTPN13	ordinary
GCH1	MTHFD1	ordinary
PTK2	WASL	ordinary
VEGFA	ROCK1	ordinary
MTA2	BRPF1	ordinary
DEK	H2AFV	ordinary
SMURF2	PTCH1	ordinary
BRAF	AGK	ordinary
PIK3R5	ARRB2	ordinary
ARFGAP3	USO1	ordinary
AGPAT5	PRELID3A	ordinary
PRELID3A	CDS2	ordinary
PLA2G4F	LPCAT1	ordinary
LPCAT1	STARD7	ordinary
PLCE1	DGKG	ordinary
VAMP3	PLIN3	ordinary
PSMA5	ANAPC15	ordinary
REPS1	ARPC4	ordinary
NPEPPS	THOP1	ordinary
ACTB	COPS8	ordinary
GSK3B	PLXNA1	ordinary
INPPL1	BIN1	ordinary
TAP1	ERAP1	ordinary
LPCAT3	PTDSS2	ordinary
ANO7	SLC4A3	ordinary
SLC6A14	TTYH3	ordinary
COPS7B	CCNF	ordinary
BIRC3	RIPK2	ordinary
CLCN4	ANO6	ordinary
NUPL2	HDAC4	ordinary
EXOSC6	NOP56	ordinary
ARPC1A	LDLRAP1	ordinary
LNPEP	HLA-G	ordinary
TAP2	ERAP2	ordinary
PSAT1	PSPH	ordinary
NUP155	XPOT	ordinary
NUP214	SNRPB	ordinary
PSME3	NPEPPS	ordinary
EXOSC1	WDR46	ordinary
GCAT	SHMT2	ordinary
PLA2G2F	AGPAT4	ordinary
LCLAT1	ACSL3	ordinary
DENND2C	RAB9B	ordinary
MAPK1	ELK1	ordinary
TP53	PIDD1	ordinary
POM121C	KPNA1	ordinary
HSPA9	HSPD1	ordinary
ATP1A1	KCNAB1	ordinary
WTAP	NCBP2	ordinary
EXOSC9	UTP3	ordinary
TRPM7	CPNE3	ordinary
MAP2K2	AGGF1	ordinary
CD3D	ZAP70	ordinary
PSMD13	TNFRSF12A	ordinary
SPRED3	RASA3	ordinary
ACOT1	AACS	ordinary
SEC24C	SEC23IP	ordinary
HDAC8	NAA38	ordinary
CHD4	KAT6A	ordinary
SLC12A2	KCNN3	ordinary
MYO18A	WASF2	ordinary
AKT1	RPTOR	ordinary
NUP133	HNRNPC	ordinary
CNOT10	EIF4A3	ordinary
CTPS1	RIMKLA	ordinary
PSMC4	SPOP	ordinary
AHCY	CTH	ordinary
SLC1A6	GAD1	ordinary
RPS27	FBL	ordinary
CATSPERB	ATP2C2	ordinary
FZD4	ARPC3	ordinary
INPP5D	FNBP1	ordinary
ACSS2	ACAT2	ordinary
ALOX5AP	ALOX15	ordinary
ALOX15	ALOX5AP	ordinary
TRIM24	FGFR2	ordinary
LAT2	VAV1	ordinary
DGAT1	FITM2	ordinary
TRPV2	TLN1	ordinary
ADA	GLUL	ordinary
GLUL	GFPT1	ordinary
PHB	ARAF	ordinary
PPP2R5E	MARK3	ordinary
HAGH	BSG	ordinary
SLC16A1	HCAR1	ordinary
PIK3R6	SGIP1	ordinary
CLTA	BLOC1S1	ordinary
UBXN7	COMMD2	ordinary
NCSTN	EPHB4	ordinary
SAP30BP	H3F3B	ordinary
DAB2	CD4	ordinary
FANCC	UBE2T	ordinary
P2RX7	TPM3	ordinary
HLA-DPA1	LCP2	ordinary
TGOLN2	PLEKHA1	ordinary
LAMTOR1	SLC3A2	ordinary
CAMK2D	MYO6	ordinary
PRMT1	HDAC1	ordinary
LCK	TYROBP	ordinary
NUP98	GEMIN5	ordinary
XRN2	DIEXF	ordinary
EXOSC4	RRP7A	ordinary
CD28	INPP5D	ordinary
SYNJ1	SBF2	ordinary
MTMR2	PIGQ	ordinary
WNK1	SCNN1A	ordinary
CCNH	TCF3	ordinary
POLR2I	NELFE	ordinary
PSMC1	MAD2L1	ordinary
PIP4K2A	SH2D2A	ordinary
PDPN	TRPC6	ordinary
POFUT2	ADAMTS1	ordinary
MTRR	IARS	ordinary
PI4KA	PLEKHA8	ordinary
DEGS1	PPM1L	ordinary
PPA2	SUCLG1	ordinary
PITPNM3	PLA2G2F	ordinary
LPIN2	PRKCB	ordinary
HLA-DQB1	CD3E	ordinary
CD3G	CD28	ordinary
GRAP2	RASGRP1	ordinary
ARRB1	EPS15L1	ordinary
PTPN1	STAT2	ordinary
BAG4	HSPA12B	ordinary
INPP4A	MTMR14	ordinary
ATP2B1	ATP2A2	ordinary
CHMP4B	GABARAPL2	ordinary
ARHGAP35	RASA1	ordinary
PPARG	CEBPA	ordinary
NR3C1	PTK6	ordinary
RHOA	PKN3	ordinary
PPARA	CPT1A	ordinary
ARHGAP9	RHOG	ordinary
LAMTOR5	CALM2	ordinary
DNAJC7	HSPA4	ordinary
CNGA1	ACTA2	ordinary
FAM20C	LGALS1	ordinary
PRKCSH	CALR	ordinary
NECAP1	M6PR	ordinary
MTMR8	PI4K2A	ordinary
ALG10	STT3A	ordinary
TMLHE	SDHD	ordinary
TPR	WDR33	ordinary
SPTBN5	KDELR3	ordinary
MYO5A	RALA	ordinary
IRF3	TBK1	ordinary
APBA1	UNC13B	ordinary
HEXA	CTSA	ordinary
TOMM7	CYC1	ordinary
MTA3	TAF1B	ordinary
DVL3	EPHB3	ordinary
PLCB2	RASGRP2	ordinary
GUSB	GLB1	ordinary
CACNA1A	STXBP1	ordinary
CTSV	HLA-C	ordinary
ARF4	KDELR2	ordinary
ATR	DBF4	ordinary
SLC6A8	CKB	ordinary
TLR2	TIRAP	ordinary
SLC38A9	RARS	ordinary
SLC3A2	GCLC	ordinary
SUV39H1	H2AFX	ordinary
H3F3B	UBTF	ordinary
LIN7C	STX1A	ordinary
GTF2H1	NCBP1	ordinary
PIP4K2C	GNG12	ordinary
PDGFB	PDGFRB	ordinary
IQGAP1	MAP2K1	ordinary
MCOLN1	ACTG2	ordinary
FTSJ3	UTP18	ordinary
NUP54	FIP1L1	ordinary
RPS15A	RPS14	ordinary
EPN2	ITSN2	ordinary
NECAP2	VAMP3	ordinary
NUP210	SYMPK	ordinary
CSNK1D	SEC23A	ordinary
CNIH1	SAR1B	ordinary
B2M	CD86	ordinary
TIAM1	RHOU	ordinary
PSMD4	OAZ3	ordinary
FURIN	MMP11	ordinary
PDGFRB	FGF1	ordinary
PLCG2	RASGRP3	ordinary
EXOSC7	IMP4	ordinary
AP2A2	ROR1	ordinary
SCMH1	CBX4	ordinary
VAMP8	PUM1	ordinary
SLC4A4	NCOA1	ordinary
CSNK2A1	SMC4	ordinary
ACTR1A	FKBP4	ordinary
PPP3CA	NFATC3	ordinary
RB1CC1	PIK3C3	ordinary
DYNLL1	NR3C2	ordinary
SLC35B3	HS2ST1	ordinary
AGPAT1	HDAC6	ordinary
PLA2G4A	PTGS2	ordinary
SUCLG2	CPT2	ordinary
CHD9	GLIPR1	ordinary
CIAPIN1	NUBP1	ordinary
POFUT1	NOTCH1	ordinary
EPS15	DAB2	ordinary
C9orf3	AZIN2	ordinary
ATP6V1H	SLC25A4	ordinary
EXOSC8	WDR75	ordinary
SPCS1	RPL15	ordinary
GPSM3	S1PR2	ordinary
FKBP1B	DMD	ordinary
HIP1R	SYT8	ordinary
CDKN1B	MCM4	ordinary
DDX21	TEX10	ordinary
INHBA	ACVR1C	ordinary
CDC16	IL6	ordinary
CACNA1D	CATSPER2	ordinary
CATSPER2	TPM4	ordinary
LAMTOR3	AIMP1	ordinary
CALM2	IQGAP3	ordinary
CBFB	SOCS3	ordinary
LEF1	TCF4	ordinary
GGT7	NCALD	ordinary
INO80B	RAD23B	ordinary
FAAH	CYP2J2	ordinary
IDH3G	SLC25A11	ordinary
ANO8	SLC4A2	ordinary
SGIP1	SYT11	ordinary
PSMB4	ANAPC7	ordinary
RPS24	NOC4L	ordinary
METTL3	GTF2F2	ordinary
HOXA1	WDR5	ordinary
HLTF	PCNA	ordinary
UBE2N	PELI1	ordinary
ACOT2	GCAT	ordinary
C1D	WDR43	ordinary
DGKZ	LPIN1	ordinary
LPIN3	DGAT2	ordinary
CDC37	LRRFIP1	ordinary
VAV2	TXK	ordinary
ABCA4	DHRS4	ordinary
HDAC1	SERPINE1	ordinary
ATAT1	SLC33A1	ordinary
NPAS2	KLF15	ordinary
TGS1	DDX20	ordinary
PSMB1	OAZ1	ordinary
TRPM4	AHCYL2	ordinary
PAFAH1B2	DYNC1LI2	ordinary
DCTN4	PTGES3	ordinary
PSMA7	TPP2	ordinary
CPSF6	TEC	ordinary
ANK1	COPG1	ordinary
CDK11A	OFD1	ordinary
CCT4	BBIP1	ordinary
RAC1	MYL12B	ordinary
PSMD12	HNRNPD	ordinary
ARFGAP2	YKT6	ordinary
LPCAT4	PLD6	ordinary
GNA14	INPP5A	ordinary
DGKQ	LPIN3	ordinary
FOXP3	IL2RA	ordinary
HSBP1	MRPL18	ordinary
CD247	ITK	ordinary
NFS1	MOCS3	ordinary
PIK3CB	SNX9	ordinary
MAP2K6	BOC	ordinary
HLA-E	FCGR3A	ordinary
ARFGAP1	KDELR1	ordinary
BTK	WAS	ordinary
UBE2L6	ISG15	ordinary
KLHL12	DVL3	ordinary
RB1	MCM2	ordinary
INPP4B	MTMR9	ordinary
YY1	COPS5	ordinary
PI4K2A	SH3GL1	ordinary
RPS16	IMP3	ordinary
FCHO2	AP2M1	ordinary
VDAC1	MICU2	ordinary
CD79A	BLNK	ordinary
NAA35	ACLY	ordinary
DCUN1D2	CUL4A	ordinary
TRPV4	TPM1	ordinary
RAF1	AGTRAP	ordinary
TRAF6	NOD2	ordinary
RPS23	RPS7	ordinary
HK3	G6PD	ordinary
GYS1	GYG1	ordinary
NOL12	HEATR1	ordinary
ARPC3	FZD4	ordinary
TYROBP	LAT2	ordinary
FGFR3	ZMYM2	ordinary
PLA2G16	PLA2G4C	ordinary
SLC25A5	ATP6V0B	ordinary
CREBBP	SERPINH1	ordinary
COPS7A	SPSB2	ordinary
PIK3R3	ARRB1	ordinary
RAD51D	BRCA1	ordinary
JAK2	ZC3HAV1	ordinary
PLXNA3	CRMP1	ordinary
PAK1	FLNA	ordinary
PIK3C2B	FNBP1L	ordinary
ARL6IP5	TTLL12	ordinary
SH3GL1	SH3KBP1	ordinary
PSME2	CD40	ordinary
PSMB5	LTBR	ordinary
AMER1	AXIN1	ordinary
NUP88	GEMIN4	ordinary
PSMB9	TNFRSF1B	ordinary
RANGRF	AKAP9	ordinary
LIG3	ZNF830	ordinary
RFC1	PALB2	ordinary
EFNB3	LIMK1	ordinary
ASL	CALM3	ordinary
CSNK1A1	APC	ordinary
AXIN1	NAMPT	ordinary
PIK3AP1	TRIM24	ordinary
MAPK11	MEF2C	ordinary
CBX2	SUMO1	ordinary
TOMM22	ATP5G1	ordinary
PSMD8	RNF146	ordinary
DCP1B	LSM2	ordinary
SUPT4H1	NABP2	ordinary
MTOR	RPS6KB1	ordinary
PLCB1	DGKE	ordinary
SMURF1	SMAD5	ordinary
NEK6	NUP62	ordinary
NUP205	KPNA4	ordinary
MTMR1	PIP4K2C	ordinary
EXOSC2	RCL1	ordinary
CD86	NCKAP1L	ordinary
PLA2G2A	LCLAT1	ordinary
LHPP	SLC25A10	ordinary
LRP10	GPC2	ordinary
PEMT	STARD10	ordinary
PLD4	PITPNM2	ordinary
PTK6	STAP2	ordinary
SLC35B4	B3GNT3	ordinary
TOP3A	FANCG	ordinary
P3H2	COL4A4	ordinary
APH1B	DTX4	ordinary
SLC25A10	PAPSS2	ordinary
EME2	BRIP1	ordinary
SPHK1	PLPP1	ordinary
GFPT2	BCAT1	ordinary
GNPDA2	PFKFB2	ordinary
ARF3	TMED2	ordinary
ERCC3	POLR2D	ordinary
PSMA6	BUB3	ordinary
UBE2D1	SMAD9	ordinary
GLB1L	GBA	ordinary
SCLY	GPT	ordinary
SRI	ATP2B4	ordinary
IMPA2	CDIPT	ordinary
CDIPT	DPM2	ordinary
VPS4B	CHMP2A	ordinary
FCGR2A	FYN	ordinary
ARF6	FCHO1	ordinary
PAK2	MYLK	ordinary
SLC12A6	ATP1B3	ordinary
ATP1B1	ABCC9	ordinary
ARF5	COPA	ordinary
SSU72	SRRT	ordinary
SLC25A16	ALDH6A1	ordinary
HADHB	PLA2G6	ordinary
ARID4B	H3F3A	ordinary
DNAJB6	HSPA6	ordinary
ATP6V1F	NME2	ordinary
PIP4K2B	GNG11	ordinary
FAM20A	MEN1	ordinary
ATP6V1D	PYGL	ordinary
PPFIA1	SLC1A6	ordinary
MOCOS	AARS	ordinary
GPT	SLC25A12	ordinary
SACM1L	PIK3C2A	ordinary
PPP2R1A	PPP2R5C	ordinary
HSP90AB1	HBEGF	ordinary
GNAI1	TRPM2	ordinary
SPRED1	DAB2IP	ordinary
RBBP4	MEAF6	ordinary
SLC9A5	DLG4	ordinary
CCNK	ATR	ordinary
RABGGTA	RAB24	ordinary
PKM	LDHA	ordinary
TTC21B	RAPGEF4	ordinary
WDR19	PRKAR1A	ordinary
ARL2	ATP6V1F	ordinary
AKT2	GSK3A	ordinary
BHLHE41	PER2	ordinary
CTSC	CD74	ordinary
PEBP1	ITGB3	ordinary
XYLT2	GPC1	ordinary
USP21	SHARPIN	ordinary
LPL	APOE	ordinary
P4HA1	COL4A5	ordinary
BARD1	AQR	ordinary
NME2	ADCY4	ordinary
ATP6V1C1	PYGB	ordinary
SEH1L	SNRPD1	ordinary
ST3GAL6	FMOD	ordinary
DDX6	LSM6	ordinary
GUK1	TTC21B	ordinary
DNAJC2	HSPA14	ordinary
CFLAR	TNFSF10	ordinary
TRADD	RIPK3	ordinary
MAT2B	INMT	ordinary
COMT	MTR	ordinary
ATP2A2	NOTCH3	ordinary
CACNA2D3	MYL6B	ordinary
PPP3R1	YWHAQ	ordinary
RAB10	EXOC2	ordinary
HCFC1	TFB2M	ordinary
P2RX4	NEB	ordinary
ARAF	ATG7	ordinary
CHM	RAB22A	ordinary
FRS2	CPSF6	ordinary
GPSM1	GPER1	ordinary
PTEN	DOCK1	ordinary
NKIRAS2	NFKBIB	ordinary
PSMD10	ANAPC10	ordinary
PPFIA4	SLC1A3	ordinary
DLST	OXCT1	ordinary
SEC16A	COL7A1	ordinary
ARF1	COPZ1	ordinary
LYN	CD22	ordinary
ACSL1	SPTLC3	ordinary
LAMTOR2	SLC7A6	ordinary
PFAS	GART	ordinary
CD79B	PIK3CD	ordinary
PTPN3	STAM	ordinary
HSD17B4	SCP2	ordinary
HENMT1	TDRKH	ordinary
FGF1	ABI2	ordinary
LPIN1	PNPLA2	ordinary
PTDSS1	OSBPL8	ordinary
GNA15	DAGLB	ordinary
CLTC	CPD	ordinary
CLCN7	ANO7	ordinary
GATAD2B	EP300	ordinary
RBBP8	FANCC	ordinary
TTF1	TAF1A	ordinary
TPCN1	VCL	ordinary
RYR1	ANXA6	ordinary
B3GLCT	CFP	ordinary
MAPK3	RPS6KA5	ordinary
SOD1	PRDX1	ordinary
STAT4	LCP1	ordinary
CAPZA1	HSP90AB1	ordinary
RXRA	G0S2	ordinary
MYD88	SNAP23	ordinary
PSMB10	TNFSF12	ordinary
SSB	POLR2K	ordinary
CTH	SERINC1	ordinary
CACFD1	MYL5	ordinary
PDHB	ACAA2	ordinary
MARC2	NOS3	ordinary
CTPS2	TTLL5	ordinary
GALE	NUDT14	ordinary
CLCN5	CLCN2	ordinary
NCK1	MAPK14	ordinary
CYCS	CASP9	ordinary
GPI	SLC37A1	ordinary
HSP90AA1	CYGB	ordinary
PGP	PLD2	ordinary
SHH	PTCH2	ordinary
POLR2J	EPAS1	ordinary
SLC25A13	GOT1	ordinary
PNPLA8	LPCAT3	ordinary
SLC39A3	S100A8	ordinary
PPP1CC	CRY2	ordinary
ESPL1	KNTC1	ordinary
ATP6V1A	ARL2	ordinary
P2RX5	CLCA4	ordinary
MMAA	SUCLG2	ordinary
ALAS1	HADHB	ordinary
CD4	PIP5K1C	ordinary
CHEK2	RNF8	ordinary
CDK6	TFDP1	ordinary
E2F5	CCNA2	ordinary
AGO4	NOTCH2	ordinary
PSMA2	ANAPC16	ordinary
CACNG4	TNNC1	ordinary
FES	PLXNA3	ordinary
PLXNA2	CDK5	ordinary
MTM1	PPP2R1A	ordinary
NUP50	CPSF3	ordinary
ANO9	SLC26A6	ordinary
PSMC5	ANAPC11	ordinary
AGPAT4	CDS1	ordinary
ASPH	VDAC3	ordinary
GPAT4	GPAT3	ordinary
SLC6A11	BEST1	ordinary
NOS3	GUCY1A3	ordinary
KRAS	IQGAP1	ordinary
ATG4D	MAP1LC3B	ordinary
USP30	PTRH2	ordinary
MSRB1	LARS	ordinary
ACTR5	DDB2	ordinary
ACLY	NAA35	ordinary
SUMO1	CDCA8	ordinary
SLC22A5	AKAP1	ordinary
LEO1	UBE2B	ordinary
CUX1	GAB2	ordinary
HLA-DPB1	CD247	ordinary
IDH3A	TMLHE	ordinary
SPTB	TMED3	ordinary
SKIV2L2	WDR36	ordinary
GNE	NANS	ordinary
CDK11B	CEP131	ordinary
UAP1	PIGC	ordinary
NUP93	SNRPG	ordinary
SLC7A11	GCLM	ordinary
POLD4	BLM	ordinary
KAT5	FANCA	ordinary
STAT3	ZEB1	ordinary
MSRA	AIMP2	ordinary
PRPS1	UMPS	ordinary
EXOSC5	DHX37	ordinary
AK2	SLC25A5	ordinary
AK9	WDR35	ordinary
CPT1A	MORC2	ordinary
PSPH	ORMDL1	ordinary
PTDSS2	OSBPL10	ordinary
MBD3	ING5	ordinary
TAF1C	HIST3H2BB	ordinary
PCOLCE	COL1A2	ordinary
LOXL1	MFAP5	ordinary
PSMF1	BUB1B	ordinary
MMP7	SPP1	ordinary
IRAK3	TLR2	ordinary
AQR	ERCC6	ordinary
SLC6A6	ANO9	ordinary
SRC	QKI	ordinary
AGBL5	TTLL1	ordinary
ACVR2A	ACVR1B	ordinary
SMAD2	JUNB	ordinary
HDAC2	BRD7	ordinary
PLCG1	DGKZ	ordinary
COQ9	COQ3	ordinary
TNRC6B	NLK	ordinary
B3GALT6	SDC1	ordinary
HLA-DRA	CD3G	ordinary
BAG1	HSPA12A	ordinary
RAD50	ERCC8	ordinary
GMPPB	GMDS	ordinary
CHD3	BRD1	ordinary
NEK7	NDC1	ordinary
APAF1	CASP7	ordinary
HS6ST1	AGRN	ordinary
GNG10	ITPR3	ordinary
CDA	UPP1	ordinary
SOD2	PRDX5	ordinary
SLC4A2	SLC12A7	ordinary
ARPC4	VAMP8	ordinary
ESD	MGST2	ordinary
POLE3	RMI1	ordinary
PPP1CA	CSNK1E	ordinary
GTF2H2	POLR2H	ordinary
PFKL	ALDOC	ordinary
MMP9	COL16A1	ordinary
HLA-DRB1	CD3D	ordinary
ACO2	IDH3A	ordinary
IDH2	AASS	ordinary
GTF2H5	POLR2L	ordinary
GCLC	GSS	ordinary
SPTBN2	CD55	ordinary
ATP6V0C	ARL2BP	ordinary
BMP1	LOXL2	ordinary
COL18A1	MMP9	ordinary
RBBP7	BRPF3	ordinary
SLC35A1	ST6GALNAC6	ordinary
PPIB	COL12A1	ordinary
TNFSF10	RIPK1	ordinary
RIPK1	IKBKG	ordinary
EP300	TNFRSF21	ordinary
PFKP	ALDOA	ordinary
GLUD1	OGDH	ordinary
FRAT2	CSNK1A1	ordinary
SLC6A9	ANO5	ordinary
OTUD7B	TAB3	ordinary
ACSL5	ZDHHC21	ordinary
SPTBN1	ARCN1	ordinary
CASP8	PLEC	ordinary
TNKS2	PTEN	ordinary
IRAK1	PELI3	ordinary
BRAP	BRAF	ordinary
GGCX	VKORC1L1	ordinary
RNF216	TRIM25	ordinary
OPLAH	SLC25A22	ordinary
SLC1A3	TTLL7	ordinary
CCND1	E2F2	ordinary
TRIB3	AKT1	ordinary
PDE3A	GMPR	ordinary
PPIA	NFATC2	ordinary
COMMD4	NEDD8	ordinary
TMED2	SEC24B	ordinary
STON2	PIP5K1B	ordinary
EPHA4	EFNA1	ordinary
EFNA1	VAV3	ordinary
HSPH1	HSPA5	ordinary
MB21D1	TMEM173	ordinary
DDAH2	NMRAL1	ordinary
ITPR3	CALD1	ordinary
ATP6V1B2	PICK1	ordinary
MKNK1	PPP2CB	ordinary
CASK	PPFIA1	ordinary
NFRKB	COPS4	ordinary
RAB7A	CAPZA2	ordinary
MAP2K4	MAPK9	ordinary
NIPAL1	MRS2	ordinary
MRS2	DLD	ordinary
IGF2R	MYO10	ordinary
CCZ1B	RAB7A	ordinary
DYRK1A	RBBP4	ordinary
LIN37	CDC6	ordinary
POLD2	RAD51	ordinary
NLK	TCF7L2	ordinary
PRKCA	STXBP3	ordinary
CYB5B	KARS	ordinary
ALG10B	MAGT1	ordinary
CTNNB1	AXIN2	ordinary
NUP37	SNRPF	ordinary
VTA1	CHMP4C	ordinary
SLC4A7	NCOA2	ordinary
PDZD11	PANK2	ordinary
FZR1	MCM7	ordinary
MUS81	KAT5	ordinary
PLCH1	ITPKB	ordinary
PPP2R1B	YWHAB	ordinary
TBL1XR1	TIAM2	ordinary
PIDD1	CASP2	ordinary
IDH3B	GPT2	ordinary
MAPKAPK2	ZFP36	ordinary
ALOX5	ALOX12	ordinary
MMP19	LAMC2	ordinary
TXNRD1	SEPHS2	ordinary
AGBL3	NICN1	ordinary
APH1A	DTX2	ordinary
PLCD1	PRKCD	ordinary
RGS3	GNA11	ordinary
GALNT6	MUC15	ordinary
COPS4	DTL	ordinary
SREBF1	ELOVL6	ordinary
TP73	BBC3	ordinary
SLC5A3	SLC9A6	ordinary
AHCYL2	FGF13	ordinary
SLC25A26	MRM1	ordinary
PSMB6	NUMB	ordinary
IRS2	WASF3	ordinary
CTSL	HLA-B	ordinary
SPCS3	RPN2	ordinary
CNOT11	PABPC1	ordinary
SPTLC1	KDSR	ordinary
DENND6A	RAB14	ordinary
MFSD2A	CAMK2D	ordinary
PHC1	HNRNPK	ordinary
CBL	TGFBR2	ordinary
MCFD2	SEC24A	ordinary
SAP30	H2AFZ	ordinary
MMP1	IGFBP3	ordinary
CASP14	SPRR3	ordinary
GRB2	CSK	ordinary
PLCH2	DGKQ	ordinary
IFT140	PRKACB	ordinary
IL6R	STAT3	ordinary
NUP188	ALYREF	ordinary
RRAGB	MARS	ordinary
UBA52	RFC2	ordinary
NCOA6	GRHL1	ordinary
TNFRSF10A	TNFRSF10B	ordinary
TNFRSF10D	TNFRSF10C	ordinary
LAMTOR4	MAF1	ordinary
TNFRSF12A	TRAF2	ordinary
CHMP6	GABARAP	ordinary
PTPN11	IFNAR2	ordinary
ALDH6A1	PCCB	ordinary
CCNG1	MDM2	ordinary
CCND3	E2F5	ordinary
SEC11C	RPN1	ordinary
MAP3K7	CHUK	ordinary
ATP6V0D1	ADPGK	ordinary
CA9	NT5E	ordinary
UBE2V1	TAB2	ordinary
GSS	GSTM3	ordinary
USP15	SMAD1	ordinary
IL1R1	IRAK1	ordinary
SSRP1	MDC1	ordinary
RAB11A	EXOC1	ordinary
NAA30	ARFRP1	ordinary
PLD3	PLPP4	ordinary
RAB18	BICD2	ordinary
ABHD12	AQP9	ordinary
TBC1D10B	RAB35	ordinary
USP4	RBCK1	ordinary
RDH10	HSD17B1	ordinary
RNF168	BARD1	ordinary
SLC24A1	TRPM7	ordinary
IL3RA	PDPK1	ordinary
NUP160	IPO8	ordinary
PLPP5	PRKCE	ordinary
EIF5	EIF3J	ordinary
PRMT5	GEMIN2	ordinary
MTAP	APRT	ordinary
SLC23A2	CAMK2G	ordinary
ITGA2	MET	ordinary
GTF2H4	POLR2I	ordinary
COQ5	COQ7	ordinary
POLE4	XRCC2	ordinary
INO80	DDB1	ordinary
EBNA1BP2	LAS1L	ordinary
FZD3	DVL2	ordinary
B3GNT5	MUC1	ordinary
NCOA1	PLIN2	ordinary
SHMT1	ALDH9A1	ordinary
HEXB	NEU1	ordinary
IFT122	HCN3	ordinary
UBQLN2	FCHO2	ordinary
PIGO	PIGS	ordinary
RIPK3	TLR3	ordinary
MED25	CD36	ordinary
SPIDR	EXO1	ordinary
RAD51C	CDK4	ordinary
CERS6	AASDHPPT	ordinary
PPP1R13B	FAS	ordinary
FGD2	RHOH	ordinary
USP13	USP10	ordinary
NEURL1	DLL1	ordinary
SH3KBP1	PIK3AP1	ordinary
TFPT	COPS6	ordinary
RPS19BP1	SIRT1	ordinary
ARNTL	PPARA	ordinary
NR1D1	ARNTL	ordinary
CASP3	STK4	ordinary
CSNK1G2	GSK3B	ordinary
DZIP1	SPOPL	ordinary
PITPNA	PLCG1	ordinary
TIMM50	HSCB	ordinary
LCMT1	PPP2R3B	ordinary
DNM1	AP2S1	ordinary
PLCB3	DGKD	ordinary
CDKN2A	CCND1	ordinary
POLH	BRCA2	ordinary
PARG	FEN1	ordinary
MDC1	TP53BP1	ordinary
PIK3CA	PICALM	ordinary
P3H1	COL6A1	ordinary
CACNB3	CACNB1	ordinary
WDR77	GEMIN7	ordinary
SFRP2	FZD1	ordinary
LRP6	FZD6	ordinary
SLC9A1	SLC9A7	ordinary
RNF2	BMI1	ordinary
NIP7	UTP4	ordinary
PMPCA	PHB	ordinary
FAM114A2	MAP2K2	ordinary
GNAI3	PRKAR2A	ordinary
AGL	SLC2A6	ordinary
ERCC4	TOPBP1	ordinary
CCT5	BBS4	ordinary
RAB3GAP2	DCTN4	ordinary
CEPT1	PNPLA8	ordinary
CLCN3	SLC12A6	ordinary
CTSA	GLB1L	ordinary
THEM4	ACSF2	ordinary
CAMK2G	EPB41L1	ordinary
ASNS	NARS	ordinary
MNAT1	POLR2G	ordinary
PTPMT1	PLA2G4F	ordinary
PTPN6	LYN	ordinary
RILP	CAPZA1	ordinary
IL7	IL7R	ordinary
ADH1C	ALDH1A3	ordinary
FAR1	NUDT7	ordinary
NSMCE1	SMC3	ordinary
TRMT112	GSPT2	ordinary
SLC38A2	SLC38A1	ordinary
ACAA2	ACAT1	ordinary
ADCY7	PDE7B	ordinary
AMPD2	RHCG	ordinary
DCP1A	LSM3	ordinary
EFNB1	GIT1	ordinary
LIMK1	CFL1	ordinary
IPMK	IPPK	ordinary
IP6K2	IP6K1	ordinary
MAPK14	CBX8	ordinary
ERAP2	B2M	ordinary
SENP1	SUMO3	ordinary
SARM1	TICAM1	ordinary
PPP2CA	FOXM1	ordinary
CLNS1A	SNRPD3	ordinary
CDKN2C	CCND2	ordinary
CDK4	E2F4	ordinary
HIST1H2BK	HIST1H4I	ordinary
SLC39A7	MT1F	ordinary
GBA2	HK1	ordinary
SRSF10	HNRNPR	ordinary
OAT	AADAT	ordinary
P4HA3	COL6A3	ordinary
VAC14	MTM1	ordinary
HK1	SLC37A2	ordinary
EXOSC10	UTP14A	ordinary
VPS4A	CHMP6	ordinary
BPNT1	NSF	ordinary
RPS11	DDX49	ordinary
B4GAT1	PRELP	ordinary
DCP2	LSM7	ordinary
ACTR1B	DCTN1	ordinary
ABCA2	SULT2B1	ordinary
MTMR3	PITPNB	ordinary
XRN1	LSM4	ordinary
PPA1	PNP	ordinary
RMI2	USP7	ordinary
PMM2	GMPPB	ordinary
GMPPA	DPM3	ordinary
ADAMTS2	COL3A1	ordinary
PSME1	UBE2C	ordinary
TP63	PERP	ordinary
INPP5B	ITPK1	ordinary
MBOAT7	PIGA	ordinary
CRLS1	TAZ	ordinary
CCT3	BBS2	ordinary
RPS5	SNU13	ordinary
INO80E	COPS2	ordinary
EFNB2	PAK2	ordinary
PRKAG1	LAMTOR3	ordinary
ACTR8	GPS1	ordinary
NSMCE2	RAD21	ordinary
PIAS3	MITF	ordinary
NUP62	CPSF4	ordinary
STAT6	GATA3	ordinary
RMI1	FAAP24	ordinary
SDHB	FH	ordinary
MED1	RGL1	ordinary
PSMD5	CDC23	ordinary
NAA38	SLC27A5	ordinary
CAD	DHODH	ordinary
GPCPD1	ETNK1	ordinary
CATSPER1	RASGRF1	ordinary
RGS10	GNAI1	ordinary
SMC4	NCAPD3	ordinary
NLRX1	RNF135	ordinary
LPCAT2	PLD1	ordinary
PRKAB1	TBC1D1	ordinary
B4GALT7	SDC2	ordinary
MAPK7	MEF2A	ordinary
SARDH	GARS	ordinary
IL2RB	STAT5B	ordinary
GCLM	GGCT	ordinary
PLD2	PITPNM3	ordinary
PLPP4	PRKCZ	ordinary
MYO1C	HIST1H2BG	ordinary
MYH7B	EXOC6	ordinary
VPS28	PPIA	ordinary
PTPN12	NRG1	ordinary
BLNK	DAPP1	ordinary
WWP1	SCNN1G	ordinary
IL4R	STAT6	ordinary
SIGIRR	TLR6	ordinary
RPA1	HSPB1	ordinary
SLC39A14	GPR39	ordinary
TSC2	MLST8	ordinary
CD180	LY96	ordinary
ASRGL1	FARSA	ordinary
AMDHD2	GNPDA2	ordinary
ITPA	NT5C2	ordinary
OXCT1	SDHA	ordinary
SLC4A3	ARHGEF9	ordinary
MAML2	HEY1	ordinary
DPM2	PIGL	ordinary
EPHA2	EFNA3	ordinary
BBS10	TTC8	ordinary
PPME1	PPP2R2A	ordinary
PPP2R3B	RBL2	ordinary
SCN1B	SLC9A8	ordinary
ACOX1	EHHADH	ordinary
PDP2	DLAT	ordinary
DLAT	CS	ordinary
ALDH4A1	GOT2	ordinary
SLC13A3	GRIN2D	ordinary
GPR161	PDE2A	ordinary
TECR	SCD	ordinary
CNOT8	EIF4E	ordinary
MMP14	LAMB1	ordinary
NKIRAS1	RELA	ordinary
GAB1	PAG1	ordinary
TBC1D1	RAB13	ordinary
GUCY1A3	PDE5A	ordinary
TAB3	MAP2K4	ordinary
GOT2	DARS2	ordinary
CAMKMT	CALM1	ordinary
SLC35B2	CHST1	ordinary
ABCD1	PLA2G16	ordinary
FAM120B	ANGPTL4	ordinary
XRCC5	PRKDC	ordinary
E2F2	EZH2	ordinary
PAXIP1	DCLRE1C	ordinary
MAPKAP1	SGK1	ordinary
SPTAN1	COPE	ordinary
SAP30L	HIST1H2BK	ordinary
PI4KB	PLEKHA3	ordinary
FOLH1	TTLL4	ordinary
PRDX5	TXN2	ordinary
TYK2	IL27RA	ordinary
ERLIN2	GAB1	ordinary
TAB2	MAP3K7	ordinary
CNDP2	MOCOS	ordinary
CCNT2	SMAD3	ordinary
PROC	F13A1	ordinary
UBB	RFC5	ordinary
TOMM20	ATP5A1	ordinary
HERC2	KDM4A	ordinary
PIK3C2A	RUFY1	ordinary
CCNT1	SMAD4	ordinary
IFIH1	CASP10	ordinary
RFC3	RAD51AP1	ordinary
GGCT	CARS	ordinary
ORAI2	TMOD2	ordinary
P3H3	COL8A2	ordinary
TSC1	MTOR	ordinary
NADSYN1	RIMKLB	ordinary
SMPD3	SGMS2	ordinary
PPRC1	TFAM	ordinary
PPP2R2A	BANF1	ordinary
BAG5	HSPA4L	ordinary
OCRL	MTMR1	ordinary
SHB	BCAR1	ordinary
MUT	ALAS1	ordinary
TTC37	PPAT	ordinary
PORCN	WNT9A	ordinary
MTMR6	PIP4K2A	ordinary
RAPGEF2	HRAS	ordinary
RNF181	BCL10	ordinary
BCAT2	ABAT	ordinary
HELZ2	TXNRD1	ordinary
KDM4A	HERC2	ordinary
APC	CTNNB1	ordinary
HIST1H2BC	HIST4H4	ordinary
CNOT3	EIF4A2	ordinary
RANBP9	NRAS	ordinary
PGK1	GAPDH	ordinary
ELL	GTF2H5	ordinary
MTMR12	PI4K2B	ordinary
FBP1	PFKFB3	ordinary
PIKFYVE	MTMR2	ordinary
CHCHD4	TIMM8A	ordinary
HSD17B7	EBP	ordinary
ERCC2	POLR2E	ordinary
ATP6V0B	AK9	ordinary
VAPA	MOV10	ordinary
ATP6V0A2	ABCC4	ordinary
IFNAR1	JAK1	ordinary
PI4K2B	PIK3CA	ordinary
USP8	LRIG1	ordinary
GPS1	COMMD4	ordinary
ARHGAP11A	RHOB	ordinary
SLC39A10	C1QBP	ordinary
GNG5	CNTRL	ordinary
MMP13	COL14A1	ordinary
RNF111	GTF2H3	ordinary
AGBL2	LRRC49	ordinary
EFNA3	VAV2	ordinary
GDPD3	GPCPD1	ordinary
PCGF2	UBE2I	ordinary
NMT1	BID	ordinary
PIGW	ACSL4	ordinary
CARM1	TRIB3	ordinary
CSNK2A2	NCAPH	ordinary
DNAJB1	HSPA1B	ordinary
BABAM1	HIST2H2AC	ordinary
INO80C	RBX1	ordinary
DCTD	TYMS	ordinary
PHLPP2	AKT2	ordinary
MCM5	POLA2	ordinary
NCOR1	NR1D1	ordinary
MTMR4	VAC14	ordinary
RAB13	MYO1C	ordinary
CNOT1	EIF4G1	ordinary
ASNA1	SEC61B	ordinary
ACOT4	SLC27A2	ordinary
SOCS5	CUL5	ordinary
RBL2	MYBL2	ordinary
CNGB1	TCAP	ordinary
ITPKC	INPP5J	ordinary
RIN3	RAB31	ordinary
STIM1	PPP3CA	ordinary
AK3	NME4	ordinary
NME4	NADK2	ordinary
ATIC	IMPDH2	ordinary
ADRA2C	GNG7	ordinary
PSENEN	NGFR	ordinary
ENO1	PKM	ordinary
MAOA	PRDX6	ordinary
EVC	SUFU	ordinary
E2F3	EED	ordinary
CITED2	CREBBP	ordinary
ARNT	CA9	ordinary
ITSN1	PIP5K1A	ordinary
MED8	FABP4	ordinary
TNFAIP3	TRAF1	ordinary
IPPK	IP6K2	ordinary
MED13L	LPL	ordinary
TRAP1	SDHB	ordinary
XYLT1	HSPG2	ordinary
DNMT1	H2AFJ	ordinary
RAB14	EXOC5	ordinary
IGF1R	IRS1	ordinary
FIG4	MTMR4	ordinary
DENND4C	CHM	ordinary
TLR3	CASP8	ordinary
ADAM10	JAG2	ordinary
METAP2	DARS	ordinary
AGO3	RUNX1	ordinary
HIST1H4I	EYA2	ordinary
PIK3R1	ITSN1	ordinary
CD22	CD79A	ordinary
POLD3	RPA3	ordinary
TAGAP	RAC2	ordinary
LMAN1	SEC24D	ordinary
PMM1	GMPPA	ordinary
ERCC1	RFC4	ordinary
E2F4	CDK1	ordinary
RHEB	EIF4EBP1	ordinary
DOLK	DPAGT1	ordinary
TFDP1	RRM2	ordinary
HIBCH	BCKDHB	ordinary
SERPINE2	VWF	ordinary
INPP5E	ARF1	ordinary
IL27RA	TYK2	ordinary
CYLD	RNF31	ordinary
WNT9A	LRP5	ordinary
DAPP1	PRKCH	ordinary
ATF4	ATF3	ordinary
OSTM1	ANO1	ordinary
CCAR2	HSPA2	ordinary
FRAT1	PPP2R5E	ordinary
GUCY1B3	PRKG1	ordinary
PEX2	UBE2D3	ordinary
TFDP2	CDT1	ordinary
TNIP2	MAP3K8	ordinary
EPHA1	EFNA4	ordinary
PDK3	PDHA1	ordinary
PPP3CC	YWHAH	ordinary
METTL14	POLR2B	ordinary
CSNK2B	NCAPG	ordinary
SMC2	NCAPG2	ordinary
ADCY4	PDE1B	ordinary
DAGLB	MGLL	ordinary
FASN	ACSL5	ordinary
TRAF2	IKBKB	ordinary
EP400	UBN1	ordinary
RAB33B	MAN1A2	ordinary
ALDH18A1	OAT	ordinary
DENND4A	RAB10	ordinary
HK2	GYS1	ordinary
ADM2	GNAS	ordinary
RPA3	HSPH1	ordinary
VPS72	HIST3H2A	ordinary
SEMA4D	RRAS	ordinary
USP1	DCLRE1B	ordinary
BOP1	PDCD11	ordinary
ATG101	DYNLL1	ordinary
C2CD5	EXOC8	ordinary
MASTL	ARPP19	ordinary
VKORC1L1	GGCX	ordinary
PGM2L1	PGP	ordinary
USP18	MX1	ordinary
LIN52	TOP2A	ordinary
SPINT2	MST1	ordinary
TADA2B	HIST2H2BE	ordinary
DENND4B	GDI1	ordinary
GUCY1A2	PDE1A	ordinary
ARHGEF15	RHOJ	ordinary
TFG	SEC13	ordinary
SOCS1	TLR1	ordinary
STAT2	STAT1	ordinary
EDC3	LSM5	ordinary
ATXN7	HIST2H2BF	ordinary
DTYMK	IFT122	ordinary
OSBP	ACER2	ordinary
C4A	C5	ordinary
MCM6	POLA1	ordinary
YES1	PECAM1	ordinary
MCM3	PRIM2	ordinary
PGM1	SLC37A4	ordinary
ALOX15B	ALOX5	ordinary
ALG8	ALG10	ordinary
RGS19	GNA15	ordinary
HS2ST1	IMPAD1	ordinary
SEL1L	RPS27A	ordinary
MMS19	ERCC2	ordinary
RHOQ	EXOC3	ordinary
DPH2	EEF2	ordinary
FOXO1	RAG1	ordinary
ZAP70	GRAP2	ordinary
POLK	RAD50	ordinary
ABCA6	CH25H	ordinary
USP9X	SNCA	ordinary
RANBP2	XPO1	ordinary
POLE	TOP3A	ordinary
PPM1A	PRKAA1	ordinary
RAB3GAP1	DYNC1I2	ordinary
ISG15	KPNA2	ordinary
HADH	HADHA	ordinary
HDAC10	HIST1H2BJ	ordinary
PSMD3	CDC16	ordinary
PMPCB	TIMM21	ordinary
ANO6	SLC6A6	ordinary
CUL3	SPRED1	ordinary
P4HA2	COL5A1	ordinary
IRAK4	PELI2	ordinary
TMED5	WNT2B	ordinary
PSMB2	RELB	ordinary
POLR2G	SALL4	ordinary
PINK1	MFN2	ordinary
HEY2	HEYL	ordinary
MMP16	MMP14	ordinary
ACOT9	DBT	ordinary
SLC20A2	SLC9A9	ordinary
B4GALT3	LUM	ordinary
GFER	CHCHD5	ordinary
TP53BP2	BAX	ordinary
C4B	C4A	ordinary
KDM1A	HIST1H2AG	ordinary
TFAP2A	TGFA	ordinary
CD3EAP	HIST1H2BC	ordinary
MLST8	AKT1S1	ordinary
ADRA2A	GNG2	ordinary
METAP1	MAT2B	ordinary
KDM5B	CDKN1A	ordinary
VRK1	LEMD2	ordinary
PARP16	NNMT	ordinary
NR1H2	VLDLR	ordinary
SGK1	SCNN1D	ordinary
FZD2	AMER1	ordinary
GRIN2D	SLC24A3	ordinary
NEDD4L	UBC	ordinary
INSR	PPP2R5A	ordinary
PPP2R5C	RAF1	ordinary
DERL2	UBB	ordinary
ADAMTS14	COL5A3	ordinary
DOLPP1	DPM1	ordinary
TRPA1	CPNE7	ordinary
LY86	CD14	ordinary
CSF2RA	CSF2RB	ordinary
PRKDC	IRF3	ordinary
PSMC3IP	RPA1	ordinary
SLC2A3	GSTO2	ordinary
STK3	MOB1A	ordinary
MAGT1	MMGT1	ordinary
RBL1	E2F1	ordinary
HS3ST1	SDC4	ordinary
FKBP1A	NFATC1	ordinary
RAE1	SLBP	ordinary
SMO	GLI2	ordinary
CYP4F8	CYP4F22	ordinary
CYP4B1	CYP4F8	ordinary
TEK	KRAS	ordinary
CDC73	UBE2A	ordinary
RUVBL1	COPS7A	ordinary
SPRED2	SYNGAP1	ordinary
MMP12	LAMA3	ordinary
GNG12	NCKAP1	ordinary
UBA3	SKP1	ordinary
CALM1	CACFD1	ordinary
ABCA5	ABCA9	ordinary
UBE2V2	SUMO2	ordinary
EHHADH	HSD17B4	ordinary
PAFAH1B3	DCTN2	ordinary
LRP12	GPC6	ordinary
BBS12	BBS9	ordinary
CNOT6	PAIP1	ordinary
SMPD2	CERK	ordinary
TSN	AGO2	ordinary
GSR	GSTA4	ordinary
RFC4	XRCC3	ordinary
EDC4	PATL1	ordinary
BRCA1	FANCE	ordinary
PRPS2	HPRT1	ordinary
HIST1H2BD	CHEK2	ordinary
TPST1	PODXL2	ordinary
FBXW11	NFKBIA	ordinary
AGPAT3	PAFAH1B1	ordinary
MICAL1	GSTP1	ordinary
RANGAP1	AURKB	ordinary
PLXNA1	PAK1	ordinary
GPAT3	PLA2G4A	ordinary
MCM7	POLE	ordinary
RPTOR	ULK1	ordinary
HMGB1	DFFB	ordinary
FBXL18	FBXL7	ordinary
ST13	HSPA13	ordinary
PRKAB2	LAMTOR5	ordinary
CIT	MYL9	ordinary
FEN1	POLD3	ordinary
NAGLU	GUSB	ordinary
OSBPL1A	DCTN6	ordinary
RAD18	UBE2N	ordinary
TMEM129	UBE2J2	ordinary
STK4	LATS1	ordinary
MARC1	EEF1E1	ordinary
NCEH1	ABCA1	ordinary
MND1	HIST1H2BH	ordinary
RICTOR	AKT3	ordinary
DHCR7	DHCR24	ordinary
CCND2	E2F3	ordinary
RFC2	RAD51C	ordinary
NDC1	PHAX	ordinary
PDE7B	AMPD2	ordinary
PPP6R1	SEC24C	ordinary
ETFDH	ETFA	ordinary
ALOX12	GPX2	ordinary
WDR20	AR	ordinary
NUDT5	TKT	ordinary
MMP15	NID1	ordinary
ECT2	RHOF	ordinary
DPH3	MTAP	ordinary
LMNB1	HIRA	ordinary
SEMA3A	DPYSL3	ordinary
FADS2	ELOVL5	ordinary
SYDE2	RHOT1	ordinary
PRKAA1	LAMTOR2	ordinary
KAT2A	TAF1D	ordinary
TRPC1	RASGRF2	ordinary
ALDH2	ACSS3	ordinary
MVB12A	UBA52	ordinary
SBF2	RAB21	ordinary
GLB1	PSAP	ordinary
DYNC2H1	GLI3	ordinary
SMPD4	VAPB	ordinary
E2F1	FBXO5	ordinary
DHX9	NFKB1	ordinary
FAM96B	POLD1	ordinary
CDK2	MCM3	ordinary
PIAS1	SP3	ordinary
RORA	SREBF1	ordinary
PDK2	PDHX	ordinary
TNRC6C	NOTCH4	ordinary
PIAS2	SUZ12	ordinary
PRKACB	KCNS3	ordinary
MAN1C1	MGAT1	ordinary
CENPE	HLA-DPB1	ordinary
SAMM50	VDAC1	ordinary
JAK1	IL10RA	ordinary
MAPK8	BMF	ordinary
H2AFX	KDM4B	ordinary
ISCU	AARS2	ordinary
CDK5	LMNB1	ordinary
FBXW9	UBE2M	ordinary
MAPKAPK5	CDC42EP3	ordinary
KIF20A	HLA-DRB5	ordinary
PITPNM2	PLA2R1	ordinary
KCNJ8	ATP1B2	ordinary
GPX8	P4HB	ordinary
CHPT1	PAFAH1B3	ordinary
EFNA4	NGEF	ordinary
SPHK2	PLPP3	ordinary
CD3E	PRKCQ	ordinary
DNMT3B	HIST1H2BD	ordinary
FANCG	FANCI	ordinary
ADPGK	PGM2L1	ordinary
ARHGAP11B	RHOD	ordinary
RCHY1	RFC1	ordinary
FYN	FCER1G	ordinary
TSC22D3	SCNN1B	ordinary
GNAQ	DGKH	ordinary
PCNA	RMI2	ordinary
DTL	CUL4B	ordinary
RUVBL2	DKC1	ordinary
RFC5	NBN	ordinary
TCF3	MYB	ordinary
CDK5R1	CDC25B	ordinary
KIF23	ACTR1A	ordinary
CCNA2	MCM8	ordinary
LMBRD1	MMACHC	ordinary
CTSK	MMP13	ordinary
STRADB	PRKAG2	ordinary
MAPK12	MEF2D	ordinary
NME1	ATP6V1A	ordinary
FGF7	FRS3	ordinary
HMGB2	H1F0	ordinary
NRP1	DPYSL2	ordinary
TDP1	XRCC6	ordinary
PAFAH1B1	DYNC1H1	ordinary
LDLR	TFRC	ordinary
COASY	SLC25A16	ordinary
CDS2	CRLS1	ordinary
MTMR9	PIP4K2B	ordinary
SLC5A6	HLCS	ordinary
FGF13	SLC4A4	ordinary
NADK2	MCCC2	ordinary
STK11	PRKAA2	ordinary
ISYNA1	IMPA2	ordinary
PPP2CB	SPRY2	ordinary
ERAP1	TAPBP	ordinary
USP28	CLSPN	ordinary
SGMS2	SMPD2	ordinary
DRAP1	SMAD2	ordinary
ESCO1	PDS5A	ordinary
CD274	HLA-DRB1	ordinary
GABPB1	POLG2	ordinary
MCM4	PRIM1	ordinary
SLC39A4	S100A7	ordinary
LIN7A	PPFIA4	ordinary
OSBPL5	PLA2G12A	ordinary
KIF15	HLA-DPA1	ordinary
PTPN22	HLA-DRA	ordinary
CCNE2	CDKN1B	ordinary
TRAPPC1	RAB1A	ordinary
NARFL	NUBP2	ordinary
PIGU	PLAUR	ordinary
IVD	MCCC1	ordinary
PLK3	CDC25C	ordinary
PPP5C	PIAS4	ordinary
RNF20	HIST1H2BN	ordinary
RIN1	RAB5A	ordinary
RUNX3	TEAD1	ordinary
CCNE1	RB1	ordinary
THTPA	SLC25A19	ordinary
PAN3	EIF4A1	ordinary
BRIP1	MNAT1	ordinary
NEK9	RAE1	ordinary
USP2	TAB1	ordinary
CASP6	SATB1	ordinary
SLC37A4	G6PC3	ordinary
CCNB1	CENPK	ordinary
PTPRC	HLA-DQA1	ordinary
VRK2	TMPO	ordinary
MAPK6	NCOA3	ordinary
GABPA	MTERF1	ordinary
CEP131	AJUBA	ordinary
FGFBP3	FGF7	ordinary
PPARGC1B	ATP5B	ordinary
HMGCL	NAGS	ordinary
CCNF	CUL1	ordinary
GDA	RHBG	ordinary
TTL	TUBB2A	ordinary
POLE2	RAD51B	ordinary
SYT11	ARPC1A	ordinary
GEN1	WRN	ordinary
FGFR1	WASF1	ordinary
CLCN2	SLC6A11	ordinary
YME1L1	SMDT1	ordinary
DLC1	RHOBTB1	ordinary
TNFRSF10C	TNFRSF10D	ordinary
DEPDC1B	RHOT2	ordinary
MBOAT1	OSBPL5	ordinary
NEURL1B	DLL4	ordinary
CNOT6L	EIF4B	ordinary
SFRP1	LRP6	ordinary
SLC25A12	ASNS	ordinary
DLG1	ATP2C1	ordinary
NFIB	POLR3K	ordinary
MYO9A	RHOA	ordinary
AMT	MTHFD2	ordinary
CFH	C3	ordinary
TCP1	BBS7	ordinary
CDC25A	CCNE1	ordinary
ACTL6A	COPS3	ordinary
CCNB2	KIF2C	ordinary
EXO1	MAD2L2	ordinary
FANCD2	RAD51D	ordinary
GABARAPL1	ATG3	ordinary
CTSB	COL18A1	ordinary
MYBL2	CCNB2	ordinary
MRM1	SLC25A26	ordinary
EZH2	CDKN2A	ordinary
SLC19A1	MTRR	ordinary
CHKA	PCYT2	ordinary
PPM1K	BCKDHA	ordinary
MMP11	MMP1	ordinary
UBC	RFC3	ordinary
POLR2H	SOX2	ordinary
BUB1B	DIAPH2	ordinary
SEC23A	LMAN1	ordinary
FAAP24	FANCD2	ordinary
VAMP2	CLINT1	ordinary
TBL1X	PEX11A	ordinary
CBX8	CETN2	ordinary
SHMT2	AMT	ordinary
ST3GAL3	MUC4	ordinary
PDGFRA	BAG4	ordinary
RPS6KA3	CREB1	ordinary
TIMP2	MMP2	ordinary
DNA2	LIG3	ordinary
USP34	TNKS	ordinary
POLD1	RBBP8	ordinary
[truncated: 238 more rows]

## Sheet: BRCA
gene1	gene2	type
SPPL2B	TNF	critical
ITGA4	ITGAL	critical
ITGAL	ITGA4	critical
ABAT	ALDH5A1	critical
PNP	XDH	critical
CFD	CFB	critical
APIP	ENOPH1	critical
KMT5A	PHF8	critical
SRM	DHPS	critical
EIF2AK3	EIF2S1	critical
LPGAT1	PLA2G4F	critical
PIGL	PIGW	critical
EBP	SC5D	critical
PECR	PHYH	critical
PTPMT1	CRLS1	critical
ETHE1	TST	critical
SRD5A3	DOLK	critical
PMVK	MVD	critical
SBF2	RAB21	critical
NANS	NANP	critical
NMNAT2	NADSYN1	critical
TFAP2A	TGFA	critical
TFAP2C	ESR1	critical
SLC44A1	CHDH	critical
COQ2	COQ6	critical
IDUA	SGSH	critical
HIPK2	CBFB	critical
PGLS	PGD	critical
HDC	HNMT	critical
ATP7A	ATOX1	critical
ADSL	ATIC	critical
RALGDS	RALB	critical
AURKA	PHLDA1	critical
SLC35D1	POMGNT2	critical
PLK2	NPM1	critical
CSNK1G2	GSK3B	critical
MANEA	B4GALT1	critical
AFMID	KMO	critical
WWOX	TFAP2C	critical
CYP46A1	CYP39A1	critical
DMPK	PLN	critical
NGFR	SMPD2	critical
SLC25A10	MDH1	critical
MMAB	MMAA	critical
ALG2	ALG11	critical
ALG1	ALG2	critical
FUK	FPGT	critical
NRF1	TFB2M	critical
PHYH	HACL1	critical
AZIN2	AGMAT	critical
CRK	KIDINS220	critical
LGMN	TLR7	critical
PKN1	PPP1R14A	critical
G6PD	PGLS	critical
ALAD	HMBS	critical
PDXK	PNPO	critical
ALG6	ALG8	critical
MTAP	APRT	critical
GMDS	TSTA3	critical
LSS	CYP51A1	critical
RPS6KA5	ATF1	critical
FOXO3	SOD2	critical
METTL22	KIN	critical
DMGDH	SARDH	critical
CDO1	CSAD	critical
NSDHL	HSD17B7	critical
COX10	COX15	critical
PIGV	PIGB	critical
LRAT	RBP1	critical
TJP1	GJA1	critical
ACSM3	ACADS	critical
TRIM21	DDX41	critical
KMO	KYNU	critical
ZNF385A	SFN	critical
HMBS	UROS	critical
PPCS	PPCDC	critical
ATF2	MSH2	critical
TBC1D25	RAB33B	critical
SLC27A2	AMACR	critical
TMEM55B	ING2	critical
AMD1	SMS	critical
LIAS	MARS2	critical
PRKCZ	SPHK1	critical
CTSB	COL15A1	critical
PCYT1A	CHPT1	critical
LIPT1	DHTKD1	critical
DTX4	ZBP1	critical
HPGDS	AKR1C3	critical
ECI1	MECR	critical
WWTR1	SMAD7	critical
CARNS1	CARNMT1	critical
USP10	SNX3	critical
USP19	RNF123	critical
BAP1	HCFC1	critical
RFK	FLAD1	critical
MST1	MST1R	critical
CAT	NUDT12	critical
ARSA	GALC	critical
PROS1	F5	critical
HYKK	PHYKPL	critical
NAE1	UBA3	critical
TSPO	FDX1	critical
TGFB1	ZFHX3	critical
MGAT1	MAN2A2	critical
DIO1	SULT1A1	critical
RUNX2	LGALS3	critical
ESR1	KCTD6	critical
MSMO1	NSDHL	critical
DCPS	NT5C3B	critical
AMY2B	MGAM	critical
MAN2B2	MANBA	critical
MAN2B1	MAN2B2	critical
LZTFL1	ARL6	critical
AKR1A1	CRYL1	critical
SIRT3	IDH2	critical
PUM2	DCUN1D3	critical
BPHL	VARS	critical
LDLRAP1	LDLR	critical
FGR	LRP8	critical
ITPK1	IPPK	critical
C1QBP	F12	critical
DHODH	UMPS	critical
ZBED1	CHD3	critical
CDS2	PGS1	critical
ESRRA	PERM1	critical
CRLS1	TAZ	critical
SQLE	LSS	critical
DGAT1	FITM2	critical
DGAT2	PNPLA4	critical
FOXM1	CENPF	critical
SH2B1	GHR	critical
PCK2	SLC25A1	critical
HSD3B7	PTGIS	critical
UGDH	SLC35D1	critical
GLO1	HAGH	critical
HIF1A	RORA	critical
SLC31A1	ATP7B	critical
CHEK1	WEE1	critical
ADI1	GOT1	critical
CS	ACO2	critical
CP	HEPH	critical
DENND3	RAB12	critical
PTS	SPR	critical
SAE1	UBA2	critical
CHKB	PCYT1A	critical
THBD	PROCR	critical
EEF1A2	EEF1A1	critical
ERBB4	CXCL12	critical
CERK	CPTP	critical
CYP26B1	CRABP1	critical
CPT2	ACADVL	critical
PGM3	UAP1	critical
PPCDC	COASY	critical
HCFC1	TFB1M	critical
FDX1	FDXR	critical
PPP1R1B	PDE4B	critical
CPOX	PPOX	critical
ALG11	RFT1	critical
CDC25B	CDK2	critical
COQ5	COQ7	critical
GPHN	MOCOS	critical
CASP7	VIM	critical
MYC	MAPKAPK5	critical
GNPNAT1	PGM3	critical
DEGS2	ACER3	critical
ALDH9A1	BBOX1	critical
SGPL1	ALDH3B1	critical
UROS	UROD	critical
PGM2	DERA	critical
ZDHHC2	CKAP4	critical
SMS	SAT1	critical
CFI	CR1	critical
F5	F8	critical
GSTZ1	FAH	critical
SGMS2	SMPD3	critical
HGS	STAM2	critical
HGD	GSTZ1	critical
BACE1	APP	critical
CSK	PDCD1	critical
RANBP10	RANBP9	critical
CYCS	CASP9	critical
MICU3	SLC8B1	critical
CYB5R2	SLC40A1	critical
HACL1	ALDH3A2	critical
GART	PFAS	critical
SC5D	DHCR7	critical
ENOPH1	ADI1	critical
PGAM5	FUNDC1	critical
SEPHS2	SEPSECS	critical
PCBD1	QDPR	critical
OTUB1	RNF128	critical
PRMT3	RPS2	critical
SLC25A1	ACO1	critical
HMGCR	MVK	critical
ACADS	ECHS1	critical
ACADM	DECR1	critical
USP45	ERCC1	critical
USP47	POLB	critical
PPARGC1B	ATP5B	critical
HMGCS1	HMGCR	critical
SORD	XYLB	critical
ALDH1A1	GLYCTK	critical
ACO1	IDH1	critical
ADK	CMPK1	critical
DECR1	ECI1	critical
MOCS2	GPHN	critical
MOCS1	MOCS2	critical
JAK3	IL4R	critical
SLC2A5	KHK	critical
ECHS1	HADH	critical
CEACAM1	FN1	critical
CEACAM6	ITGA5	critical
F10	F7	critical
ADHFE1	D2HGDH	critical
CLU	C7	critical
SH2D2A	AXL	critical
SALL4	SALL1	critical
PGS1	PTPMT1	critical
TRAF6	ITGB3BP	critical
ELOVL2	FADS2	critical
ELOVL1	FADS1	critical
MTF1	CSRP1	critical
LEP	LEPR	critical
NPM1	NOP2	critical
LRP2	CUBN	critical
USP28	CLSPN	critical
RENBP	NAGK	critical
UPP1	DPYD	critical
GLRX3	ALAD	critical
CYBRD1	SLC11A2	critical
ST14	KLK5	critical
RNF144A	UBE2L3	critical
OMA1	OPA1	critical
VCPKMT	VCP	critical
MYO7A	RDH11	critical
CBL	TGFBR2	critical
MVK	PMVK	critical
YAP1	ITCH	critical
ABCA4	RDH14	critical
RFT1	ALG3	critical
HPSE	IDUA	critical
CYB5R3	CYB5A	critical
CYB5R1	CP	critical
CYB5RL	FTH1	critical
USP8	LRIG1	critical
USP7	FOXO4	critical
TOMM40	PINK1	critical
IPMK	IP6K2	critical
PPRC1	TFAM	critical
GALK1	GALT	critical
HBEGF	GPNMB	critical
RWDD3	SAE1	critical
ADCYAP1R1	NTRK2	critical
PHGDH	PSAT1	critical
ENPP1	ACP5	critical
NUPL2	HDAC4	ordinary
RHOA	PKN3	ordinary
SPTBN4	TMED3	ordinary
INPP4A	SBF2	ordinary
RRAGB	MARS	ordinary
ATP1B3	SCN4B	ordinary
P2RX7	TNNI1	ordinary
GNA11	DAGLA	ordinary
SYNJ1	SYNJ2	ordinary
BAG4	HSPA12B	ordinary
LPIN3	DGAT2	ordinary
EIF1AX	RPL22	ordinary
APP	ACTA2	ordinary
BTC	ERBB4	ordinary
PDGFRB	FYN	ordinary
CNTRL	SOS1	ordinary
KPNA1	HMGA1	ordinary
UBB	RFC5	ordinary
COPS3	LRR1	ordinary
GAB2	FGFR1OP2	ordinary
AGL	SLC2A6	ordinary
HK2	GYS1	ordinary
HLA-DPA1	GRAP2	ordinary
SRI	ATP2B4	ordinary
GNB1	INPP5A	ordinary
PRKAA2	TSC1	ordinary
LAMTOR1	EIF4EBP1	ordinary
CDKN1A	ORC6	ordinary
PIK3AP1	FGF2	ordinary
IKBKG	NFKBIE	ordinary
INPP5J	PIK3R3	ordinary
CDK11B	CEP131	ordinary
RPS28	UTP14C	ordinary
ACSL3	SPTLC1	ordinary
ATP1B1	SLC9A1	ordinary
RPS27L	DCAF13	ordinary
HDAC6	MID1IP1	ordinary
ANO10	SLC6A12	ordinary
SLC6A6	BEST1	ordinary
ERLIN2	GAB1	ordinary
ADCY9	PDE4A	ordinary
ARAF	ATG7	ordinary
PSMB1	ANAPC11	ordinary
VNN1	PANK1	ordinary
CDKN1B	MCM4	ordinary
PTPRK	CBL	ordinary
UBA52	POLD2	ordinary
TLR1	TIRAP	ordinary
TIRAP	IRAK2	ordinary
FKBP1B	DES	ordinary
CATSPERG	NEB	ordinary
GTF2H4	GTF2F2	ordinary
CD3G	CD28	ordinary
GNG10	INPP5J	ordinary
MMP2	SCUBE3	ordinary
EPHB3	LIMK2	ordinary
ITPKC	INPPL1	ordinary
RPS24	RPS7	ordinary
POFUT2	ADAMTS1	ordinary
IGF2R	MYO10	ordinary
INPP4B	MTMR9	ordinary
ITK	RASGRP2	ordinary
BCAT1	EGLN3	ordinary
PNPLA8	MBOAT2	ordinary
PLBD1	LPCAT3	ordinary
TRPV6	TMOD1	ordinary
GNB4	CACNA1D	ordinary
DDB2	XPC	ordinary
CUL4B	ERCC6	ordinary
ARRB2	PTPN13	ordinary
CDC42	SPC24	ordinary
FCGR2A	CD86	ordinary
FGFR2	KL	ordinary
LCP2	BTK	ordinary
AGBL3	SLC25A12	ordinary
TAT	YARS	ordinary
SLC35A1	ST6GALNAC6	ordinary
MPHOSPH6	NOP58	ordinary
RPS16	IMP3	ordinary
SOAT1	ACLY	ordinary
SLC12A2	ABCC9	ordinary
CD247	ITK	ordinary
BCR	WASF2	ordinary
SLC4A7	NCOA2	ordinary
SLC24A1	TRPM7	ordinary
AGPAT5	PRELID3A	ordinary
SSU72	SRRT	ordinary
SLC25A11	LIMD1	ordinary
EGLN1	HIF1A	ordinary
FAR1	AGPS	ordinary
AKAP9	MYL6B	ordinary
CDK11A	ODF2	ordinary
RIOK3	PNO1	ordinary
RHOB	PKN2	ordinary
CACNA1A	PPFIA4	ordinary
PPP3CA	NFATC3	ordinary
FAM20A	TMEM132A	ordinary
CACNB1	ATP2A1	ordinary
PPP2R5E	YWHAB	ordinary
AKT2	GSK3A	ordinary
VPS4A	CHMP3	ordinary
AHCYL2	NCOA1	ordinary
SLC5A6	HLCS	ordinary
PLCH1	ITPKB	ordinary
DLG4	PPP3CB	ordinary
TYROBP	LAT2	ordinary
PLCG1	DGKD	ordinary
PLA2G6	CYP2U1	ordinary
RBBP8	FANCC	ordinary
SLC4A5	SLC20A1	ordinary
GTF2H2	POLR2D	ordinary
NECAP2	VAMP3	ordinary
ATP6V1B2	ADPGK	ordinary
MCOLN3	SORBS1	ordinary
PSMD7	GTSE1	ordinary
MTMR2	PITPNB	ordinary
B2M	FGFR3	ordinary
LRRFIP1	CYFIP1	ordinary
SYNJ2	MTMR6	ordinary
TAB1	MAP2K7	ordinary
MAP2K3	MAPKAPK3	ordinary
VAV1	INPP5D	ordinary
TP53	PIDD1	ordinary
MTMR14	PIGC	ordinary
STAM	PIP5K1A	ordinary
CDIPT	PIGQ	ordinary
GLS	EARS2	ordinary
AADAT	GOT2	ordinary
CAMK2B	AKAP5	ordinary
AGFG1	ARPC2	ordinary
MTOR	SGK1	ordinary
RPS6KB1	EEF2K	ordinary
TRPV2	TLN1	ordinary
PPFIA1	ARL6IP5	ordinary
CATSPERB	TNNT1	ordinary
PIK3CG	PACSIN3	ordinary
NECAP1	M6PR	ordinary
GBA2	HK1	ordinary
FRS2	CPSF6	ordinary
PRKACA	LIPE	ordinary
RNF216	TRIM25	ordinary
CYLD	SHARPIN	ordinary
NFIC	POLR3C	ordinary
CHM	RAB22A	ordinary
PIP4K2B	GNB5	ordinary
PDPN	TRPC6	ordinary
LPCAT3	STARD10	ordinary
STAM2	EPS15	ordinary
RAB43	STX6	ordinary
XRN2	WDR36	ordinary
PIK3R5	ARRB2	ordinary
FNBP1L	SCARB2	ordinary
MAPKAPK5	KALRN	ordinary
DNAJB1	HSPA1B	ordinary
STAT4	LCP1	ordinary
TRPC4AP	TTN	ordinary
MCOLN1	ITGA1	ordinary
IRAK4	PELI2	ordinary
PAFAH1B2	DYNC1I2	ordinary
VNN2	PANK3	ordinary
LDLR	TFRC	ordinary
CD4	PIP5K1C	ordinary
NAA35	ACSL3	ordinary
DNAJC6	SNX2	ordinary
KLRD1	FCGR1A	ordinary
REPS1	IGF2R	ordinary
SCARB2	INPP4B	ordinary
KITLG	KIT	ordinary
STAT3	FOS	ordinary
PSMC1	MAD2L1	ordinary
AAK1	TF	ordinary
CHRNA1	VDAC3	ordinary
ADCY1	PDE1C	ordinary
ARFGAP3	USO1	ordinary
ACOT1	ACSL1	ordinary
BTK	WIPF1	ordinary
EXOSC10	WDR75	ordinary
PPP3R1	YWHAQ	ordinary
PACSIN2	TGOLN2	ordinary
SEC11A	RPS17	ordinary
SPRED2	SYNGAP1	ordinary
GNGT2	DGKI	ordinary
ERCC3	POLR2B	ordinary
SPCS3	RPN2	ordinary
RPS27	FBL	ordinary
B3GLCT	CFP	ordinary
CLCN5	CLCN2	ordinary
COPS7B	CCNF	ordinary
PLCE1	DGKG	ordinary
PPP2R5C	MARK3	ordinary
RAF1	TRAK1	ordinary
CACNA1F	RASGRF1	ordinary
MID1IP1	ELOVL1	ordinary
P2RX1	TPM3	ordinary
C1D	WDR43	ordinary
TSC2	MLST8	ordinary
SYK	PIK3CD	ordinary
NUP35	GEMIN6	ordinary
PAPSS1	SLC35B2	ordinary
SLC35B3	HS2ST1	ordinary
METTL3	POLR2H	ordinary
ADCY2	PDE3B	ordinary
VDAC2	MICU2	ordinary
TRADD	RIPK3	ordinary
RAC1	PKN1	ordinary
TPR	WDR33	ordinary
RPS11	DDX49	ordinary
EPN2	ITSN2	ordinary
GTF2H5	POLR2L	ordinary
NUP98	DDX20	ordinary
CHRM3	GNAQ	ordinary
GNA15	DAGLB	ordinary
THEM4	ACSM5	ordinary
WNT5A	FZD2	ordinary
RB1	MCM2	ordinary
MAT2A	MECOM	ordinary
SLC24A3	TRPM2	ordinary
SLC9A5	GRIN1	ordinary
ACTR1A	FKBP4	ordinary
SLC6A8	CKB	ordinary
GPR161	PDE3A	ordinary
ARNTL	BHLHE41	ordinary
ITPKB	OCRL	ordinary
FAM20C	LGALS1	ordinary
RAD50	ERCC8	ordinary
POLD3	RAD51	ordinary
PDE4D	AMPD3	ordinary
RYR2	MYL12B	ordinary
CHD3	EP300	ordinary
MNAT1	POLR2G	ordinary
SEL1L	RPS27A	ordinary
CLCN3	ANO6	ordinary
EXOSC7	IMP4	ordinary
PSAT1	PSPH	ordinary
PSMD6	UBE2E1	ordinary
IQGAP1	MAP2K1	ordinary
DDIT4	YWHAG	ordinary
AP2A2	ROR1	ordinary
SMURF1	PTCH1	ordinary
RUNX3	LEF1	ordinary
NFYC	HSPA5	ordinary
FASN	ACSL5	ordinary
ERCC4	TOPBP1	ordinary
SLC20A2	SLC9A9	ordinary
CUX1	BRK1	ordinary
CD28	CNTRL	ordinary
GOT1	SLC25A13	ordinary
GRAP2	RASGRP1	ordinary
CSF2RA	CSF2RB	ordinary
OTUD5	MAVS	ordinary
MAPK1	ELK1	ordinary
EXOSC6	NOP56	ordinary
ALOX15B	ALOX5AP	ordinary
ALOX5	LTA4H	ordinary
VTA1	CHMP4C	ordinary
CA2	ATP6AP1	ordinary
TTF1	TAF1A	ordinary
PRKCE	SHC1	ordinary
CEBPD	EBF1	ordinary
NUP214	SNRPB	ordinary
UBC	RFC3	ordinary
BRAF	AGK	ordinary
SLC44A2	CHKB	ordinary
CTNNB1	AXIN2	ordinary
RBM28	HEATR1	ordinary
NOL12	SNU13	ordinary
OSBPL10	PLA1A	ordinary
CREBBP	PPARA	ordinary
RPS8	RRP9	ordinary
UBE2D3	SMAD5	ordinary
AK2	SLC25A5	ordinary
AK9	WDR19	ordinary
CLTB	FZD5	ordinary
FGF13	AHCYL2	ordinary
TECR	CERS5	ordinary
RIPK3	TICAM1	ordinary
RANBP2	KPNA5	ordinary
HK3	SLC37A2	ordinary
RAB7A	CAPZA1	ordinary
SKP1	FBXL7	ordinary
GNAO1	ITPR2	ordinary
RASGRP2	RAP1A	ordinary
OSBPL5	PLA2G12A	ordinary
ARHGEF9	AGT	ordinary
ATP1A1	KCNAB1	ordinary
TRPV4	CPLX1	ordinary
COPS4	FBXL5	ordinary
DLAT	CS	ordinary
ST3GAL2	OMD	ordinary
SPTBN5	COPG1	ordinary
HS3ST1	SDC4	ordinary
PIP4K2A	SH2D2A	ordinary
PIK3CB	ITSN1	ordinary
SLC8A1	P2RX7	ordinary
PSMB6	OAZ1	ordinary
TGS1	SNRPF	ordinary
EXOSC9	MPHOSPH10	ordinary
PLCB2	RASGRP4	ordinary
ATP6V0A1	TSPAN7	ordinary
SLC25A6	MB21D1	ordinary
POFUT1	NOTCH1	ordinary
MYO18A	TEC	ordinary
PANK4	PPCS	ordinary
STON2	PIP5K1B	ordinary
SLC2A8	ARPC1B	ordinary
HIP1R	SYT8	ordinary
SPIDR	EXO1	ordinary
KAT5	FANCA	ordinary
SLC13A3	GRIN2D	ordinary
GRIK3	ATP2A3	ordinary
DDAH2	NMRAL1	ordinary
PDPK1	RPS6KA3	ordinary
EXOSC8	UTP6	ordinary
VAMP4	ARPC5	ordinary
ITPR2	STIM1	ordinary
CYB5B	KARS	ordinary
ZMYM2	ABI2	ordinary
OCRL	MTMR1	ordinary
MBD3	UBTF	ordinary
LIN7A	SYN1	ordinary
ALAS1	CPT2	ordinary
ACSS1	HMGCS2	ordinary
POLE4	XRCC2	ordinary
RAD51D	BRCA1	ordinary
CACNA2D4	DMD	ordinary
SLC6A14	TTYH3	ordinary
FNBP1	SYT1	ordinary
ATG9A	ATG14	ordinary
PIK3R4	FIG4	ordinary
SLC6A12	ANO10	ordinary
GBF1	COPB2	ordinary
CDC37	NCKAP1	ordinary
HEY1	HEYL	ordinary
ATR	DBF4	ordinary
PIK3CD	NECAP2	ordinary
RPS5	RPS9	ordinary
ARL2	ATP6V1F	ordinary
ADCY7	PDE1B	ordinary
PFAS	RIMKLB	ordinary
GCLM	GGCT	ordinary
RPA2	SERPINH1	ordinary
MTMR6	PIP4K2A	ordinary
SLC8B1	P2RX4	ordinary
PRKACB	GFRA1	ordinary
PLA2G4C	LPCAT4	ordinary
MBOAT1	PLA2G4C	ordinary
PSMF1	BUB1B	ordinary
DVL2	HGS	ordinary
PLCD4	DGAT1	ordinary
STIM1	PPP3R1	ordinary
INPP5D	FNBP1	ordinary
EIF5	EIF3J	ordinary
UBE2D1	SMAD9	ordinary
SSB	POLR2K	ordinary
SKIV2L2	UTP15	ordinary
SLC5A1	SLC2A1	ordinary
CACNB2	ORAI1	ordinary
FZD1	PPP2R1A	ordinary
CSNK1A1	APC	ordinary
SMARCD3	SLC27A1	ordinary
POM121C	KPNB1	ordinary
ACOT9	ACAT1	ordinary
IL1RAP	BCR	ordinary
GGT7	NCALD	ordinary
ADAM10	JAG1	ordinary
TULP3	PDE7A	ordinary
NRAS	KIAA1549	ordinary
MAPK3	RPS6KA5	ordinary
EBI3	IL6ST	ordinary
IL6ST	PTPN11	ordinary
PARP16	NNMT	ordinary
PPP1CB	CSNK1D	ordinary
WNK2	SCNN1B	ordinary
CSF2RB	STAT5A	ordinary
RPS13	UTP14A	ordinary
ARFGAP2	YKT6	ordinary
GNAI2	CD209	ordinary
L2HGDH	DLST	ordinary
GGT1	DPEP2	ordinary
MTRR	FPGS	ordinary
DENND4B	GDI1	ordinary
SLC4A4	FGF13	ordinary
RANGRF	CAMK2D	ordinary
ELOVL5	ELOVL2	ordinary
METAP1	MAT2B	ordinary
RIN3	RAB31	ordinary
INO80D	COPS6	ordinary
ATP6V0A2	ABCC4	ordinary
IKBKB	CYLD	ordinary
ATP1A4	SLC38A5	ordinary
NPEPPS	TAP2	ordinary
CASP8	PLEC	ordinary
SPTAN1	COPE	ordinary
FURIN	MMP11	ordinary
ATP6V1C2	AK7	ordinary
CA13	AQP1	ordinary
ATP6V0D1	DTYMK	ordinary
SCNN1D	CAMK2B	ordinary
PDHB	ACAA2	ordinary
TRPM7	TMOD3	ordinary
LPIN2	PRKCB	ordinary
FGFR1	GAB2	ordinary
PITPNM3	PI4K2A	ordinary
SARM1	TLR4	ordinary
SLC4A3	SLC12A4	ordinary
ANO5	SLC6A9	ordinary
GCHFR	PTS	ordinary
PRKCB	STX4	ordinary
ACHE	SLC44A3	ordinary
GRIA3	ITGA11	ordinary
DYNC1H1	HSP90AA1	ordinary
CTH	SERINC1	ordinary
PI4KA	PIK3C2A	ordinary
PGD	RPE	ordinary
RPIA	PRPS2	ordinary
ORMDL1	ATAT1	ordinary
FBXW11	NFKB1	ordinary
PSMD5	CDC27	ordinary
ACTR8	DDB1	ordinary
ELL	GTF2H5	ordinary
PI4K2A	SH3GL1	ordinary
CSGALNACT2	VCAN	ordinary
RRAGA	SLC3A2	ordinary
HLA-DRA	LCP2	ordinary
TAB3	MAP2K4	ordinary
GLUD1	OGDH	ordinary
SEC24C	SEC23IP	ordinary
APAF1	CASP7	ordinary
ARHGAP9	RHOG	ordinary
NIP7	UTP4	ordinary
PLD3	LIPH	ordinary
GGCX	VKORC1L1	ordinary
MTR	EPRS	ordinary
C2CD5	EXOC6	ordinary
UNC13B	SLC1A1	ordinary
EP300	TNFRSF21	ordinary
HLA-DPB1	LCK	ordinary
PYGB	UGP2	ordinary
PRKAB1	TBC1D1	ordinary
HBS1L	PPAT	ordinary
GMPR2	ADSS	ordinary
PMPCB	PHB	ordinary
MMAA	SUCLG2	ordinary
SUCLG2	SLC27A3	ordinary
TPP2	THOP1	ordinary
NPAS2	KLF15	ordinary
MED1	RGL1	ordinary
TBL1X	PEX11A	ordinary
FCHO1	ACTR3	ordinary
ALOX5AP	GPX4	ordinary
ARID4B	H3F3A	ordinary
OSBPL8	SACM1L	ordinary
MYO5A	EXOC8	ordinary
AGPS	NUDT7	ordinary
NCK2	MAPK11	ordinary
TNFAIP3	TRAF1	ordinary
RAB18	ACTR10	ordinary
TAP2	ERAP1	ordinary
SLC22A5	AKAP1	ordinary
CASK	PPFIA1	ordinary
TAGAP	RAC2	ordinary
RGS5	GNAI3	ordinary
PPP2R5B	AXIN1	ordinary
RABGGTA	RAB24	ordinary
PAPSS2	SLC35B3	ordinary
GLUD2	CPS1	ordinary
TMED5	WNT2B	ordinary
DCP2	LSM7	ordinary
IL2RA	IL2RB	ordinary
NEK6	NUP62	ordinary
NUP88	GEMIN4	ordinary
MAP3K7	CHUK	ordinary
PRKAB2	LAMTOR5	ordinary
LAMTOR3	AIMP1	ordinary
NCOA2	ACOX1	ordinary
PLCB4	SYNJ1	ordinary
TPCN2	LMOD1	ordinary
MAP2K1	PAPD7	ordinary
YES1	BTC	ordinary
DGKZ	LPIN1	ordinary
NCOR1	NR1D1	ordinary
SLC7A6	SLC4A5	ordinary
HEXB	NEU1	ordinary
RAB3GAP2	DYNC1LI2	ordinary
SUOX	PRDX3	ordinary
AK7	ADCY5	ordinary
FAM114A2	MAP2K2	ordinary
CAB39	PRKAB2	ordinary
MAPK8	BMF	ordinary
HIP1	ADRB2	ordinary
CAMKMT	CALM2	ordinary
ERCC1	RFC2	ordinary
EPHB4	EFNB2	ordinary
PHF20	MDM4	ordinary
GPSM3	C3AR1	ordinary
ADRA2C	GNG11	ordinary
ADAMTS2	COL1A2	ordinary
CDC16	IL6	ordinary
MOCOS	AARS	ordinary
SLC1A5	CTPS1	ordinary
TREM2	FGF1	ordinary
GFRA1	RET	ordinary
RAB3GAP1	DYNC1H1	ordinary
GTF2H3	POLR2J	ordinary
PEBP1	ITGB3	ordinary
UBE2V1	TAB2	ordinary
GAMT	CKMT1B	ordinary
NFYB	DDIT3	ordinary
AGTPBP1	TPGS2	ordinary
ACACA	ELOVL6	ordinary
RPS15A	RPS14	ordinary
IDI1	FDPS	ordinary
PORCN	WNT9A	ordinary
HSCB	GLRX5	ordinary
INO80C	RBX1	ordinary
PLD6	TRIAP1	ordinary
DCTD	TYMS	ordinary
GLUL	CTPS2	ordinary
PPP2R5D	PFKFB1	ordinary
MBTPS1	CREB3L4	ordinary
CAMK2G	EPB41L1	ordinary
FRAT1	PPP2R5E	ordinary
PPP2R5A	PDPK1	ordinary
AMPD2	ADSSL1	ordinary
ORAI1	MYL6	ordinary
POM121	GEMIN5	ordinary
PPFIA4	SLC1A3	ordinary
PEX2	UBE2D1	ordinary
PAK2	MYLK	ordinary
PPA1	PNP	ordinary
CDH1	SRC	ordinary
PDGFB	PDGFRB	ordinary
BTRC	PRLR	ordinary
MDC1	TP53BP1	ordinary
NEURL1B	DLL4	ordinary
PLD4	PITPNM2	ordinary
GFPT2	GNPDA1	ordinary
CYP4F11	CYP4F22	ordinary
DVL1	EPN1	ordinary
MTA1	TAF1C	ordinary
LHPP	SLC25A10	ordinary
ANK1	TMED9	ordinary
NAGS	ACSM1	ordinary
HLA-DRB1	CD3D	ordinary
LIN7C	STX1A	ordinary
RALGAPA2	RALA	ordinary
POLH	DNA2	ordinary
NEDD4L	UBC	ordinary
CATSPER2	ITGB5	ordinary
GFPT1	GNPNAT1	ordinary
MVD	IDI1	ordinary
CACNA1C	SPARC	ordinary
SLC35C1	FUT3	ordinary
XYLT1	HSPG2	ordinary
NUP58	KPNA3	ordinary
VAMP7	SH3D19	ordinary
ATP6V1E1	SLC25A4	ordinary
HEXA	CTSA	ordinary
GLB1L	GBA	ordinary
COMT	MTR	ordinary
BRAP	BRAF	ordinary
DNAJB6	HSPA6	ordinary
WTAP	NCBP2	ordinary
SRSF10	SRSF1	ordinary
WDR35	PDE8B	ordinary
TLR6	IRAK4	ordinary
PITPNM2	PLA2R1	ordinary
SPTLC1	KDSR	ordinary
TOP3A	FANCG	ordinary
ACO2	IDH3A	ordinary
IDH3B	SLC25A11	ordinary
LTA4H	CYP4F11	ordinary
AAAS	SNRPD2	ordinary
SEPT2	PLK4	ordinary
PLXNA1	CDK5	ordinary
AGBL5	TTLL1	ordinary
GCLC	GSS	ordinary
GRIN1	CPNE7	ordinary
CHCHD4	TIMM8A	ordinary
ACLY	NAA35	ordinary
MAOB	PRDX2	ordinary
ANK3	TMED7	ordinary
PIP5K1C	DOCK1	ordinary
ABCD1	DPM2	ordinary
RDH10	HSD17B1	ordinary
GNA14	PRKCH	ordinary
GAB1	PAG1	ordinary
CERS5	DEGS2	ordinary
HMGCL	NAGS	ordinary
EXOSC2	RCL1	ordinary
SYT11	PLEKHA2	ordinary
AHCYL1	STXBP1	ordinary
ARL2BP	ATP6V0C	ordinary
CILP	IGF1	ordinary
IGF1R	IRS1	ordinary
NUP54	FIP1L1	ordinary
NUP153	CPSF2	ordinary
CSNK1E	DVL1	ordinary
AP2B1	GRIA3	ordinary
CCAR2	HSPA2	ordinary
RNF111	GTF2H3	ordinary
STRADA	PRKAB1	ordinary
PRKAG1	LAMTOR3	ordinary
NUDT4	NUDT3	ordinary
NUDT3	NUDT4	ordinary
CTSV	HLA-B	ordinary
EDC4	LSM3	ordinary
ABCC1	GGT5	ordinary
PNPO	DPH6	ordinary
UBQLN2	AAK1	ordinary
TOMM20	ATP5A1	ordinary
RGS9	PDE6B	ordinary
PIGN	CEPT1	ordinary
ANOS1	FGFR1	ordinary
RB1CC1	PIK3C3	ordinary
EPHB6	TIAM1	ordinary
MTMR1	PIP4K2C	ordinary
ALG10B	MAGT1	ordinary
GMPR	IMPDH1	ordinary
SREBF2	SQLE	ordinary
CUL3	SPRED1	ordinary
SLC5A3	SLC9A6	ordinary
INO80	COPS2	ordinary
SCN1B	DLG4	ordinary
DCTN4	PTGES3	ordinary
INSR	PPP2R1B	ordinary
FOLH1	TTLL7	ordinary
SEH1L	SNRPD1	ordinary
TGOLN2	INPP4A	ordinary
SHC1	TRPC1	ordinary
ACSM1	GLYATL1	ordinary
PIK3C3	RUFY1	ordinary
DCP1B	LSM2	ordinary
SLC37A4	G6PC3	ordinary
HMOX1	BLVRA	ordinary
MSRB2	MAT2A	ordinary
NFIA	POLR3GL	ordinary
BAG2	HSPA4L	ordinary
NF1	RASA1	ordinary
UBE2B	UBE2N	ordinary
INPP5E	PLEKHA8	ordinary
SLC25A13	ASNS	ordinary
TEC	PRKCA	ordinary
SLC38A2	SLC38A1	ordinary
PPARD	ACSL6	ordinary
NAA30	ARFRP1	ordinary
HMGB1	DFFB	ordinary
LCK	TYROBP	ordinary
TAB2	S100B	ordinary
MAP2K4	MAPK9	ordinary
CHUK	REL	ordinary
BAG3	HSPA1A	ordinary
RNF168	BARD1	ordinary
MAP2K7	MAPK10	ordinary
MMP15	NID1	ordinary
PLXNA2	DPYSL4	ordinary
CHPT1	PAFAH1B3	ordinary
DLG1	ATP2C1	ordinary
SLC39A10	S100A8	ordinary
UBXN7	DCUN1D1	ordinary
PRMT5	GEMIN2	ordinary
RPA1	HSPH1	ordinary
MADD	RAB27B	ordinary
SLC38A9	RARS	ordinary
NUP160	IPO8	ordinary
ABCB7	ABCG2	ordinary
PPP2CA	FOXM1	ordinary
SACM1L	PIGA	ordinary
TNIP2	MAP3K8	ordinary
ACTR1B	DCTN2	ordinary
PSMD9	ANAPC5	ordinary
ATP6V1D	PYGL	ordinary
TCP1	BBS7	ordinary
NUP107	SLBP	ordinary
OGDH	GCDH	ordinary
MRS2	PDHX	ordinary
SMAD3	CDKN2B	ordinary
B3GNT5	MUC1	ordinary
NUDT10	NUDT11	ordinary
ATP6V0E1	GUK1	ordinary
PIP5K1B	PLCB3	ordinary
HPS1	RAB32	ordinary
GATAD2B	BRPF3	ordinary
RXRA	PLIN2	ordinary
LRP12	GPC6	ordinary
METTL14	POLR2I	ordinary
UBA3	SKP1	ordinary
OSBP	SGMS1	ordinary
VAPA	MOV10	ordinary
GALNT12	MUC16	ordinary
NBN	TCEA1	ordinary
MBTPS2	ATF6	ordinary
SLC9A1	SLC9A7	ordinary
METAP2	DARS	ordinary
IL1B	MAP3K3	ordinary
CARD11	IKBKG	ordinary
CD79B	BLNK	ordinary
CBLB	NCK1	ordinary
SUMF2	ARSG	ordinary
GPT	MPC2	ordinary
HEPH	LCN2	ordinary
RFC1	NBN	ordinary
PSMC6	SKP2	ordinary
FKBP1A	NFATC1	ordinary
TXNRD1	SEPHS2	ordinary
TP73	BAX	ordinary
CASP1	IL18	ordinary
MKS1	GLI1	ordinary
CD3D	ZAP70	ordinary
EPHA1	EFNA4	ordinary
ABCB10	FLVCR1	ordinary
SPHK1	PLPP1	ordinary
PRDX5	TXN2	ordinary
PSME4	ANAPC1	ordinary
NCK1	MAPK14	ordinary
RUNX1	NR4A3	ordinary
RPS19BP1	SIRT1	ordinary
SLC35A3	MGAT4B	ordinary
SP1	FASN	ordinary
IDH1	WTIP	ordinary
KYNU	HAAO	ordinary
PRKG2	KCNMB1	ordinary
PCF11	INTS3	ordinary
ACSL6	ORMDL2	ordinary
USP1	DCLRE1B	ordinary
IDS	HEXB	ordinary
COPS8	DTL	ordinary
ITGB3	KDR	ordinary
HPS4	RAB38	ordinary
MLX	AGPAT1	ordinary
GDE1	GPAT4	ordinary
NUP188	ALYREF	ordinary
ADAM17	NRG1	ordinary
HRASLS	GDPD1	ordinary
YY1	COPS5	ordinary
OPLAH	SLC25A22	ordinary
BMP1	LOXL2	ordinary
NUP50	XPO1	ordinary
SLC38A1	SLC38A2	ordinary
FGFR1OP	BAIAP2	ordinary
ATP6V1C1	PYGB	ordinary
GPSM1	GPER1	ordinary
RICTOR	AKT3	ordinary
DYRK1A	LIN54	ordinary
LIN37	E2F1	ordinary
OAT	ABAT	ordinary
IRS1	FGFR4	ordinary
PTDSS2	OSBPL8	ordinary
INO80B	RAD23B	ordinary
PSMA1	LTB	ordinary
NOS3	GUCY1A3	ordinary
HSD17B4	EHHADH	ordinary
SARDH	GARS	ordinary
PGM2L1	PGP	ordinary
MDM2	DYRK2	ordinary
VDAC3	MICU3	ordinary
XRCC6	PRKDC	ordinary
MAPK6	NCOA3	ordinary
MUS81	KAT5	ordinary
MAPK14	CBX8	ordinary
NLRC5	IFIH1	ordinary
PTGS1	PTGDS	ordinary
MTFMT	MTHFD1L	ordinary
CACNB4	CPNE1	ordinary
C9orf3	SLC7A6	ordinary
GSK3B	ZNRD1	ordinary
TALDO1	GPI	ordinary
MPI	PMM2	ordinary
IGF2	IGF1R	ordinary
TBC1D1	RAB13	ordinary
TRAF1	TNFRSF1A	ordinary
BLMH	TAP1	ordinary
MAPK11	CBX2	ordinary
CPLX1	HSPA8	ordinary
TNRC6B	NLK	ordinary
NUP133	HNRNPC	ordinary
HSP90AA1	CYGB	ordinary
COPS7A	SPSB2	ordinary
ARNT	VEGFA	ordinary
CPT1B	SLC25A20	ordinary
SUMF1	ARSD	ordinary
PLCB1	DGKE	ordinary
MUT	ALAS1	ordinary
PPM1K	BCKDHA	ordinary
MIB2	JAG2	ordinary
ANAPC16	FZR1	ordinary
NFRKB	COPS4	ordinary
RABGGTB	RAB3D	ordinary
SPTBN2	KDELR3	ordinary
AGPAT3	PAFAH1B1	ordinary
AGPAT1	HDAC6	ordinary
PIK3C2A	PIKFYVE	ordinary
KSR1	RAF1	ordinary
ARPC1A	LDLRAP1	ordinary
PRKCD	CARD9	ordinary
ATAT1	SLC33A1	ordinary
PDCD6IP	ANTXR2	ordinary
LTBR	TRAF3	ordinary
TRAPPC11	CHML	ordinary
RAD51C	CDK4	ordinary
GPT2	ALDH18A1	ordinary
TRAF3	MAP3K14	ordinary
RAB14	EXOC5	ordinary
CAMK2D	MYO6	ordinary
GNB5	FGF10	ordinary
KBTBD7	NF1	ordinary
HS2ST1	IMPAD1	ordinary
PSMB7	ANAPC2	ordinary
ULK1	DENND3	ordinary
STK11	PRKAA2	ordinary
KAT2A	TAF1D	ordinary
BIRC2	NOD2	ordinary
HSPA8	AP3B1	ordinary
RPTOR	ULK1	ordinary
GAPVD1	RAB5B	ordinary
LRP5	FZD8	ordinary
IL2RG	JAK3	ordinary
FECH	ABCB7	ordinary
IL12RB1	STAT4	ordinary
ATG4C	GABARAPL1	ordinary
RPS23	NOC4L	ordinary
SCP2	ACOT8	ordinary
XIAP	TLE3	ordinary
IFT122	PDE7B	ordinary
PSMB10	CD40	ordinary
TP53BP2	BBC3	ordinary
NAGLU	GUSB	ordinary
PIGF	PIGK	ordinary
EPHA3	EFNA1	ordinary
TPST1	PODXL2	ordinary
BAG1	HSPA12A	ordinary
MAP3K11	ARAF	ordinary
AKAP1	TPM2	ordinary
TKT	PFKFB4	ordinary
SNX9	WNT5A	ordinary
FTSJ3	NOL11	ordinary
MAT2B	INMT	ordinary
PLCD1	PRKCD	ordinary
SOD1	PRDX1	ordinary
DLD	GCSH	ordinary
TICAM1	MAP3K7	ordinary
MTMR4	VAC14	ordinary
VAC14	MTMR12	ordinary
DNM3	CLTC	ordinary
GUCY1A2	PDE1A	ordinary
D2HGDH	ADHFE1	ordinary
CEPT1	PTDSS2	ordinary
RPS27A	RFC4	ordinary
UAP1	SLC35A3	ordinary
ATG13	AMBRA1	ordinary
N6AMT1	ETF1	ordinary
AGBL2	LRRC49	ordinary
COPS2	FEM1B	ordinary
SLC36A4	IDO1	ordinary
SSRP1	MDC1	ordinary
CLTA	BLOC1S1	ordinary
PTDSS1	PLA2G16	ordinary
KIF7	GLI2	ordinary
PTPN12	PDGFB	ordinary
SPRED1	RASAL2	ordinary
WRN	REV3L	ordinary
GUCY1B3	PRKG1	ordinary
ATG12	ATG10	ordinary
RAB11A	EXOC3	ordinary
MICAL1	GSTP1	ordinary
PRKG1	MRVI1	ordinary
PLA2G2A	MBOAT7	ordinary
NCOA6	TXNRD1	ordinary
SLC30A1	PGLYRP2	ordinary
BAZ1B	H2AFV	ordinary
MTM1	PPP2R5A	ordinary
GNAS	PRKAR2B	ordinary
GIT1	MYL12A	ordinary
CRTC1	PER1	ordinary
PPARGC1A	GABPA	ordinary
PTK2B	SHB	ordinary
VEGFA	ROCK1	ordinary
TYK2	IL27RA	ordinary
WWP1	SCNN1G	ordinary
NUP43	CPSF3	ordinary
CHRNA5	SRI	ordinary
MAPK7	MEF2C	ordinary
ALG10	STT3A	ordinary
RGP1	RAB6B	ordinary
GABPB1	POLG2	ordinary
PSMD13	LTBR	ordinary
CACNA2D2	CACNA2D1	ordinary
SBF1	PIGP	ordinary
GZMH	IGFBP3	ordinary
TTC21B	RAPGEF4	ordinary
SMPD3	UGT8	ordinary
AGPAT4	CDS1	ordinary
DNM1	AP2S1	ordinary
LRP6	FZD6	ordinary
JAK2	ZC3HAV1	ordinary
DAPP1	DGKA	ordinary
FIG4	MTM1	ordinary
GYS1	GYG1	ordinary
CAD	DHODH	ordinary
ATF4	ATF3	ordinary
MAPKAPK3	CBX6	ordinary
GGT5	DLG1	ordinary
GRIK4	SLC24A2	ordinary
ADPGK	PGM2L1	ordinary
CALM3	IQGAP2	ordinary
CD86	NCKAP1L	ordinary
CCT4	BBIP1	ordinary
AQP3	BST1	ordinary
EFNB2	PAK2	ordinary
DHFR	CALM1	ordinary
HLCS	ACACA	ordinary
DZIP1	SPOPL	ordinary
CALM2	IQGAP3	ordinary
ABL2	ROBO1	ordinary
TNKS2	PTEN	ordinary
PSMC5	UBE2C	ordinary
CCNH	TCF3	ordinary
PI4KB	ARF1	ordinary
APH1B	DTX4	ordinary
NUP205	KPNA4	ordinary
IRF3	TBK1	ordinary
SLC6A1	ANO1	ordinary
C4B	C4A	ordinary
IDH3G	AASS	ordinary
PI4K2B	REPS2	ordinary
PCOLCE	LOXL1	ordinary
C4A	C4B	ordinary
GRIK5	ATP2C2	ordinary
CCND3	E2F5	ordinary
GNPDA2	GFPT1	ordinary
HPGD	PTGR1	ordinary
CTSC	CD74	ordinary
SLC25A12	PAICS	ordinary
SMAD7	KEAP1	ordinary
TIGAR	PFKP	ordinary
LAMTOR4	MAF1	ordinary
PHB	KSR1	ordinary
PLD2	PITPNM3	ordinary
NCL	PDCD11	ordinary
SLC1A2	RIMKLA	ordinary
MEF2D	PPARGC1A	ordinary
C1QA	C2	ordinary
SERPINE2	F13A1	ordinary
PLAT	PDGFD	ordinary
VPS4B	CHMP4B	ordinary
DEGS1	PPM1L	ordinary
TOR1A	STON1	ordinary
ASL	CALM3	ordinary
NUDT11	NUDT10	ordinary
IL27RA	TYK2	ordinary
GTF2H1	NCBP1	ordinary
PIK3R6	SNX9	ordinary
PTPN3	STAM	ordinary
CALM1	CACFD1	ordinary
USP4	RBCK1	ordinary
IFNGR2	IFNGR1	ordinary
NADSYN1	NICN1	ordinary
GGT6	DLG3	ordinary
SEMA4D	RRAS	ordinary
CAPZA2	NR3C1	ordinary
GZMB	BID	ordinary
MAN1A1	MGAT1	ordinary
PEX3	PEX19	ordinary
HENMT1	TDRKH	ordinary
XRN1	LSM4	ordinary
CNOT8	EIF4E	ordinary
B3GNTL1	MUC20	ordinary
FAS	RIPK1	ordinary
LIN7B	PPFIA3	ordinary
PSME3	NPEPPS	ordinary
GUSB	GLB1	ordinary
NR1D1	NPAS2	ordinary
CLOCK	CRY1	ordinary
PPM1A	PRKAG1	ordinary
PLCD3	ITPKC	ordinary
TRRAP	TCF4	ordinary
ADA	GLUL	ordinary
MAP2K2	AGGF1	ordinary
CPSF6	CYFIP2	ordinary
NUP37	SMN1	ordinary
IL4R	STAT6	ordinary
CHMP5	CHMP2B	ordinary
ACTB	COPS7B	ordinary
COASY	SLC25A16	ordinary
ADCY3	PDE2A	ordinary
HDAC2	BRD7	ordinary
NRIP1	ARNTL	ordinary
VRK2	TMPO	ordinary
HLA-DQB1	CD247	ordinary
PLCG2	INPP5B	ordinary
FDFT1	PLPP6	ordinary
ATP6V1H	NME1	ordinary
SUPT5H	SNAPC4	ordinary
MDM4	JMY	ordinary
ATP6V1A	ARL2	ordinary
PSMC3	TNKS2	ordinary
RBBP4	ING5	ordinary
ELOVL7	HSD17B12	ordinary
ATP2B1	ATP2A2	ordinary
ROCK1	PPP1R12A	ordinary
EDC3	LSM5	ordinary
PSMA2	ANAPC16	ordinary
CSNK1D	TRAPPC9	ordinary
ST3GAL6	PRELP	ordinary
TTL	TUBB6	ordinary
ACOT2	GCAT	ordinary
SAP30BP	H3F3B	ordinary
SUPT4H1	NABP2	ordinary
IDH3A	TMLHE	ordinary
NME2	ADCY4	ordinary
CTSA	SLC17A5	ordinary
OTUD7B	TAB3	ordinary
HLA-DQA1	CD3E	ordinary
PRKCQ	EZR	ordinary
MCRS1	RAD23A	ordinary
CLCN4	SLC12A6	ordinary
SLC16A1	HCAR1	ordinary
NPL	MPC1	ordinary
LDHA	SLC16A1	ordinary
PTP4A2	RABGGTB	ordinary
FGFR4	FRS3	ordinary
WDR77	GEMIN7	ordinary
TAX1BP1	XIAP	ordinary
CD3E	PRKCQ	ordinary
DDX21	TEX10	ordinary
PSMB9	RELB	ordinary
HSBP1	MRPL18	ordinary
TOR1B	STON2	ordinary
MAGT1	MMGT1	ordinary
SOD2	PRDX5	ordinary
P3H3	COL6A1	ordinary
PSMD1	CUL3	ordinary
WIPI2	GABARAPL2	ordinary
CNIH1	SAR1B	ordinary
POLR1C	HIST1H2BN	ordinary
IFIH1	CASP10	ordinary
CCNT1	ATR	ordinary
PITPNM1	PLA2G2D	ordinary
PPP1CC	CRY2	ordinary
PRPS1	HPRT1	ordinary
SPHK2	PLPP3	ordinary
TSC22D3	SCNN1A	ordinary
IP6K1	PPIP5K1	ordinary
FCHO2	AP2M1	ordinary
SEC23A	CNIH3	ordinary
TBL1XR1	GRHL1	ordinary
ERAP2	TAPBP	ordinary
IRAK2	MAP2K6	ordinary
GPD1L	GPAM	ordinary
CDC73	UBE2A	ordinary
HRAS	AGTRAP	ordinary
ADCY5	RAPGEF3	ordinary
USP13	USP10	ordinary
GNAZ	PRKAR2A	ordinary
RCHY1	RFC1	ordinary
APRT	LHPP	ordinary
PTGS2	PTGS1	ordinary
ATM	POLK	ordinary
PPP1R13B	FAS	ordinary
EGFR	PXN	ordinary
MTMR12	PI4K2B	ordinary
ARSB	IDS	ordinary
CNOT1	EIF4G1	ordinary
SMAD2	JUNB	ordinary
USP15	SMAD1	ordinary
PSMD8	RNF146	ordinary
EPHA4	EFNA5	ordinary
FADS2	ABCD1	ordinary
LAMTOR5	EEF1E1	ordinary
CYP51A1	MSMO1	ordinary
TRAPPC8	RAB1A	ordinary
NEDD8	BIRC5	ordinary
PARD6A	PRICKLE1	ordinary
TMEM129	UBE2J2	ordinary
TRIM24	WASF3	ordinary
NUP93	SNRPG	ordinary
PRKAG2	RHEB	ordinary
STK3	MOB1A	ordinary
SLC26A11	PAPSS2	ordinary
CD79A	CBLB	ordinary
GOT2	DARS2	ordinary
HAGH	BSG	ordinary
GCNT4	MUC5B	ordinary
DDX6	PATL1	ordinary
BAG5	HSPA13	ordinary
RIC1	RAB6A	ordinary
ABCA2	SULT2B1	ordinary
CTSL	B2M	ordinary
PARG	FEN1	ordinary
HSD17B12	SRD5A3	ordinary
CACNA1D	CATSPER2	ordinary
PIK3C2B	FCHO1	ordinary
ITPR3	TMOD2	ordinary
SIRT1	CLOCK	ordinary
PHC1	HNRNPK	ordinary
MCAT	NDUFAB1	ordinary
GNAQ	DGKH	ordinary
PDE3A	GMPR	ordinary
MTA2	BRPF1	ordinary
ACTR5	DDB2	ordinary
POLR1A	HIST1H2BK	ordinary
PSMB8	TNFSF13B	ordinary
PIAS2	SUZ12	ordinary
NAA38	SLC27A5	ordinary
SLC25A28	LYRM4	ordinary
NFS1	MOCS3	ordinary
PIAS3	MITF	ordinary
ITSN2	ACTR2	ordinary
CRAT	ACAA1	ordinary
COPS6	WDR5	ordinary
SUPT16H	ATM	ordinary
LNPEP	HLA-G	ordinary
PEX10	UBE2D2	ordinary
GNAI3	IQGAP1	ordinary
ALG8	ALG10	ordinary
IFT140	PRKACB	ordinary
TNFRSF12A	TRAF2	ordinary
BIRC3	RIPK2	ordinary
ITPR1	MYH3	ordinary
SDR16C5	ALDH1A2	ordinary
POLR2I	NELFE	ordinary
SCLY	GPT	ordinary
SEPT7	CDC42EP3	ordinary
ALS2	RAB5A	ordinary
HRASLS2	PNPLA6	ordinary
MPC2	PC	ordinary
CLNS1A	SNRPE	ordinary
XYLT2	SDC2	ordinary
ARNTL2	SERPINE1	ordinary
ACAT2	HMGCS1	ordinary
MMS19	RTEL1	ordinary
SLC26A2	PAPSS1	ordinary
CCZ1B	RAB7A	ordinary
APC	CTNNB1	ordinary
CTSS	HLA-E	ordinary
NFIX	POLR3K	ordinary
CSNK2A2	NCAPH	ordinary
UBE2V2	SUMO2	ordinary
RPS3A	UTP18	ordinary
SEC11C	RPL26L1	ordinary
GPI	SLC37A1	ordinary
PTK2	WASL	ordinary
MAPK9	JUN	ordinary
TIMM50	HSCB	ordinary
MCM8	PRIM1	ordinary
SCMH1	CBX4	ordinary
NIPAL1	MRS2	ordinary
CDK6	TFDP2	ordinary
E2F4	MYBL2	ordinary
PSMA3	CDC26	ordinary
RBKS	PRPS1	ordinary
RIMKLA	NAALAD2	ordinary
AGO3	RUNX1	ordinary
REEP1	GNB1	ordinary
MTHFD1	ALDH1L1	ordinary
PLA2G4F	LPCAT1	ordinary
NHLRC1	EPM2A	ordinary
FZR1	MCM3	ordinary
HDAC8	NAA38	ordinary
PPP2CB	SPRY2	ordinary
ABCA3	ADRA2C	ordinary
LGR6	RNF43	ordinary
DERA	TPI1	ordinary
NKIRAS2	NFKBIB	ordinary
RAP1A	SYK	ordinary
REEP6	OR51E1	ordinary
PRDX6	GSR	ordinary
NFYA	TM7SF2	ordinary
TADA2B	HIST2H2BE	ordinary
PSMB2	TNFRSF11A	ordinary
AP2A1	ROR2	ordinary
ERCC2	POLR2E	ordinary
KDM1A	HIST1H2AG	ordinary
LYN	CD22	ordinary
CD22	CD79B	ordinary
YWHAB	FAM114A2	ordinary
PSEN1	CDH1	ordinary
CTTN	TACR1	ordinary
XRCC1	PRPF19	ordinary
PCP2	CCL28	ordinary
GNS	HEXA	ordinary
INPPL1	BIN1	ordinary
PAK1	FLNA	ordinary
MARC2	AZIN2	ordinary
AKAP13	RHOU	ordinary
ARRB1	EPS15L1	ordinary
HSPA9	HSPD1	ordinary
LPCAT4	PTDSS1	ordinary
DPAGT1	ALG14	ordinary
TRPM4	SLC9A8	ordinary
GUCY1A3	PDE5A	ordinary
MB21D1	TMEM173	ordinary
STAT6	SOCS1	ordinary
DCUN1D5	UBE2F	ordinary
VRK1	LEMD2	ordinary
RHOC	PPP1R12B	ordinary
FAM96B	POLD1	ordinary
SLC25A37	ISCU	ordinary
SLC2A3	GSTO1	ordinary
CLTC	AP1G1	ordinary
ABL1	CDKN1C	ordinary
FAN1	FANCM	ordinary
MVB12A	UBA52	ordinary
GPAT4	GPAT3	ordinary
TMLHE	SDHD	ordinary
PMM1	GMPPA	ordinary
SPCS2	SEC61G	ordinary
B3GALT6	SDC1	ordinary
AKT3	FOXO3	ordinary
PRMT1	HDAC1	ordinary
NCSTN	DTX2	ordinary
CES3	ABCG1	ordinary
IL3RA	STAT5B	ordinary
TPCN1	VCL	ordinary
POLK	RAD50	ordinary
PPP2R2A	BANF1	ordinary
RBL1	CDK1	ordinary
RAP1GAP	RAP1B	ordinary
SLC4A8	CA2	ordinary
ALDH4A1	BCAT2	ordinary
HSP90AB1	CD9	ordinary
RPE	PPP2CA	ordinary
INO80E	COPS8	ordinary
TRAPPC1	RAB1B	ordinary
PSMD12	HNRNPD	ordinary
NDC1	XPOT	ordinary
PIAS1	SP3	ordinary
B4GALT7	GPC1	ordinary
GALT	GALE	ordinary
ACSL5	ZDHHC21	ordinary
GSS	GSTM3	ordinary
AMACR	ACOX3	ordinary
EGF	SPRY1	ordinary
RAB10	EXOC1	ordinary
ANO7	SLC6A1	ordinary
STUB1	CDC37	ordinary
DDX58	IRF7	ordinary
TRIP10	FZD4	ordinary
RELB	NFKB2	ordinary
FGFR1OP2	ABI1	ordinary
REPS2	LRP2	ordinary
CBFB	SOCS3	ordinary
PIK3CA	PICALM	ordinary
SLC3A2	GCLC	ordinary
RARRES3	PNPLA7	ordinary
ARL6IP5	TTLL12	ordinary
DPH7	EEF2	ordinary
LDHB	SLC16A3	ordinary
COL18A1	MMP13	ordinary
MMP7	SPP1	ordinary
WDR19	PRKAR1A	ordinary
EPHB2	EFNB1	ordinary
DDAH1	ASS1	ordinary
COQ9	COQ3	ordinary
TOMM7	BCS1L	ordinary
DNAJC7	HSPA4	ordinary
MAPK12	MEF2A	ordinary
SLC25A5	ATP6V0B	ordinary
DHCR24	SREBF2	ordinary
CCND1	E2F2	ordinary
DPH2	MTAP	ordinary
SUMO1	CDCA8	ordinary
LAT2	VAV1	ordinary
INPP5A	INPP1	ordinary
RAB33B	MAN1A2	ordinary
CNOT6L	EIF4B	ordinary
TPK1	SLC25A19	ordinary
MTMR9	PIP4K2B	ordinary
ALG14	ALG1	ordinary
PIK3R3	ARRB1	ordinary
PDK3	PDHA1	ordinary
ICOS	CD80	ordinary
SLC22A15	AKAP9	ordinary
KDM4A	HERC2	ordinary
HEYL	HEY2	ordinary
DCTN5	PGR	ordinary
SLC1A1	TTLL11	ordinary
GNG4	CACNA2D2	ordinary
EIF4G1	UPF1	ordinary
EPN1	CLTB	ordinary
COLGALT2	COL4A5	ordinary
TNFRSF10C	TNFRSF10D	ordinary
TNFRSF10A	TNFRSF10B	ordinary
TFDP1	RRM2	ordinary
ITGA2	MET	ordinary
MPDU1	ALG6	ordinary
ALG12	ALG9	ordinary
CHML	RAB40C	ordinary
AXL	INPP5K	ordinary
SENP1	SUMO3	ordinary
PSMA7	TPP2	ordinary
GLE1	NUP188	ordinary
PIGW	ACSL4	ordinary
CARM1	TRIB3	ordinary
ACTR2	VAMP7	ordinary
PRKCSH	CALR	ordinary
ACTR3	SYT9	ordinary
ASRGL1	FARSA	ordinary
PSMC2	CDC23	ordinary
MCM7	POLA2	ordinary
NUP155	KPNA1	ordinary
USP33	CCP110	ordinary
SLC11A2	FTL	ordinary
SLC26A6	ANO9	ordinary
DENND6A	RAB14	ordinary
SPCS1	RPL15	ordinary
ISYNA1	IMPA2	ordinary
PFKL	ALDOA	ordinary
NADK2	MCCC1	ordinary
MCCC1	CA5B	ordinary
CCT2	TTC8	ordinary
CA12	CD38	ordinary
TFRC	PLEKHA1	ordinary
ATP6V0E2	AK8	ordinary
NLK	TCF7L2	ordinary
MSRB1	LARS	ordinary
PSMD11	BLMH	ordinary
LRIG1	EGFR	ordinary
RGS3	GNA11	ordinary
RFC3	RAD51AP1	ordinary
AP2M1	GRIP1	ordinary
EVC	SUFU	ordinary
VAV3	ITPR1	ordinary
PTPN1	APBB1IP	ordinary
STAT2	STAT1	ordinary
KRAS	BRAP	ordinary
P4HA2	COL5A1	ordinary
HERC2	KDM4A	ordinary
SMC2	NCAPG2	ordinary
CDC34	NFKBIA	ordinary
POLE3	RMI1	ordinary
UBE2D2	TLR3	ordinary
DHCR7	DHCR24	ordinary
FXYD6	KCNE4	ordinary
FAAH	CYP2J2	ordinary
TOMM5	CYC1	ordinary
ARF6	FCHO2	ordinary
DHX9	RELA	ordinary
SLC35B2	CHST1	ordinary
SYN1	RAB3A	ordinary
DENND4A	RAB10	ordinary
PGAM1	ENO3	ordinary
IRAK1	PELI1	ordinary
ERBB2	PLXNB1	ordinary
OSTM1	ANO8	ordinary
SFRP2	FZD1	ordinary
ATF6	HSP90B1	ordinary
DGKQ	LPIN3	ordinary
RNF181	BCL10	ordinary
RRAGC	SLC7A7	ordinary
CHST1	FMOD	ordinary
NFKB2	IL1B	ordinary
MCOLN2	MYH11	ordinary
HIBCH	BCKDHB	ordinary
CSNK2A1	SMC4	ordinary
STK4	LATS2	ordinary
IFNAR2	IFNAR1	ordinary
ADCY6	PDE8A	ordinary
MORC2	NAA30	ordinary
CH25H	RXRA	ordinary
HLA-E	FCGR3A	ordinary
IRAK3	TOLLIP	ordinary
RBX1	SPRED2	ordinary
FBP1	PFKFB2	ordinary
C2	C5	ordinary
GPCPD1	ETNK2	ordinary
DNM2	AP2A1	ordinary
COPS5	COMMD5	ordinary
MASTL	ENSA	ordinary
AMT	MTHFD2L	ordinary
AKT1	FOXO1	ordinary
RGS1	GNAI2	ordinary
CERS6	AASDHPPT	ordinary
SOCS1	TLR2	ordinary
EXOSC5	DHX37	ordinary
NSMCE2	RAD21	ordinary
P3H1	COL6A2	ordinary
EXOSC1	WDR46	ordinary
GPS1	COMMD4	ordinary
UBE2N	MYD88	ordinary
GSR	CHAC2	ordinary
ASNS	NARS	ordinary
BBS12	BBS2	ordinary
PFKP	ALDOC	ordinary
RRP1	RRP7A	ordinary
ALS2CL	RAB5C	ordinary
ACOT4	SLC27A2	ordinary
KDSR	CERS6	ordinary
PRKCA	STXBP3	ordinary
HSPH1	HSPA1L	ordinary
INPP5B	ITPK1	ordinary
EFNB3	LIMK1	ordinary
SREBF1	SCD	ordinary
GCAT	SHMT2	ordinary
IMPDH1	GMPS	ordinary
GMPS	SLC7A11	ordinary
PPME1	PPP2R2A	ordinary
GUK1	TTC21B	ordinary
PRKAA1	LAMTOR2	ordinary
ERBB3	FGFR1OP	ordinary
HCN3	ATP1A3	ordinary
PPIB	COL12A1	ordinary
DOLK	DPAGT1	ordinary
TSC1	MTOR	ordinary
ZFYVE9	SMAD3	ordinary
HS6ST1	AGRN	ordinary
FCGR3A	GRB2	ordinary
HDAC1	MEAF6	ordinary
BEST1	CA12	ordinary
EP400	UBN1	ordinary
PSME1	BUB3	ordinary
BCKDK	DBT	ordinary
CHMP3	MAP1LC3A	ordinary
TSNAX	AGO2	ordinary
RNF5	UBB	ordinary
LTB	BIRC3	ordinary
POLD2	RMI2	ordinary
TOMM22	ATP5G1	ordinary
PEX12	UBE2D3	ordinary
ABCA12	LCN12	ordinary
POLR2J	EPAS1	ordinary
TDP2	XRCC6	ordinary
NEURL1	DLL1	ordinary
CD180	LY96	ordinary
PLPP5	PRKCE	ordinary
BRCC3	NLRP3	ordinary
DNAJC2	HSPA14	ordinary
RNF2	BMI1	ordinary
NUP85	CPSF4	ordinary
GDPD1	GDPD5	ordinary
PSMD2	TNFSF12	ordinary
HADHB	ACADM	ordinary
PSMD3	CDC16	ordinary
RORA	SREBF1	ordinary
IP6K2	IP6K1	ordinary
MET	MYO18A	ordinary
SPRED3	RASA3	ordinary
MTA3	TAF1B	ordinary
ARPC5	VAMP4	ordinary
PLCH2	DGKQ	ordinary
PPP1R12A	MYH10	ordinary
SLC35B4	B3GNT5	ordinary
RNF4	BRCC3	ordinary
NDST1	GPC2	ordinary
SOCS2	IL7	ordinary
ZNRD1	H2AFX	ordinary
CEBPB	KLF5	ordinary
GNG5	CACNA1C	ordinary
ATXN7	HIST2H2BF	ordinary
IER3	PPP2R5B	ordinary
CIAPIN1	NUBP1	ordinary
ATG101	DYNLL1	ordinary
COMMD4	UBE2M	ordinary
PLA2G4A	PTGS2	ordinary
SLC39A6	KCNJ11	ordinary
FXYD3	KCNK6	ordinary
CHAC2	CNDP2	ordinary
CISH	IL2RG	ordinary
ACSS3	NAT8L	ordinary
BRCA1	LIG3	ordinary
SLC25A26	MRM1	ordinary
PPP2R1A	PPP2R5C	ordinary
PSMD10	ANAPC10	ordinary
CYP39A1	HSD3B7	ordinary
LCLAT1	PLA2G2A	ordinary
CNDP2	NFS1	ordinary
C1S	C1R	ordinary
POLD4	BLM	ordinary
TCIRG1	PICK1	ordinary
XYLB	PPP2R5D	ordinary
PPP2R3B	RB1	ordinary
RFC5	PALB2	ordinary
BCAT2	GPT2	ordinary
GCH1	MTHFD1	ordinary
PHLPP2	AKT1	ordinary
TRAP1	SDHB	ordinary
ST13	HSPA9	ordinary
ASPH	PPP3CA	ordinary
AK8	GPR161	ordinary
IVD	MCCC2	ordinary
IL6R	STAT3	ordinary
ARPC4	EGF	ordinary
PMPCA	TIMM50	ordinary
NCOA1	G0S2	ordinary
ST8SIA2	NCAM1	ordinary
HGF	FGF18	ordinary
CHMP2A	GABARAP	ordinary
DYNLL1	NR3C2	ordinary
DYNC2H1	GLI3	ordinary
KCNJ8	ATP1B2	ordinary
CLCN7	ANO7	ordinary
SMAD4	BCL2L11	ordinary
CACNG4	ACTG2	ordinary
OXCT1	SDHA	ordinary
TMED2	SEC24D	ordinary
PSMA6	CKS1B	ordinary
CDK4	E2F4	ordinary
E2F3	EED	ordinary
CTPS2	TTLL5	ordinary
P4HA1	COL5A3	ordinary
USP30	PTRH2	ordinary
SEC24D	SEC31A	ordinary
HK1	G6PD	ordinary
YME1L1	SMDT1	ordinary
GRB2	CSK	ordinary
TBC1D15	RAB7B	ordinary
HIST1H2BG	HIST1H3D	ordinary
CCND2	E2F3	ordinary
USP9X	SNCA	ordinary
PPFIA3	ACHE	ordinary
PSPH	ORMDL1	ordinary
VDAC1	MCU	ordinary
NUDT14	PGM2	ordinary
GNG12	LRRFIP1	ordinary
ZAP70	PLCG1	ordinary
PLCB3	PRKCZ	ordinary
MMP3	HBEGF	ordinary
SLC23A2	CAMK2G	ordinary
PSMB5	TNFRSF12A	ordinary
CLIP3	TRADD	ordinary
AHCY	BHMT2	ordinary
PPAT	GART	ordinary
MCCC2	AUH	ordinary
SMC5	SMC1A	ordinary
ALDH5A1	SDHC	ordinary
PTPN18	ERBB2	ordinary
KCNE4	FXYD6	ordinary
ST3GAL4	OGN	ordinary
SLC12A7	SLC12A2	ordinary
LPIN1	PNPLA2	ordinary
ACOX1	CAT	ordinary
SRC	QKI	ordinary
VCL	MAPK1	ordinary
SMPD2	SGMS2	ordinary
PIP5K1A	PIK3CA	ordinary
POLR2K	SALL4	ordinary
DVL3	EPHB3	ordinary
HCK	FCGR2A	ordinary
TDP1	XRCC5	ordinary
PPA2	SUCLA2	ordinary
MYD88	TRIM24	ordinary
IFNAR1	JAK1	ordinary
ALDH6A1	PCCB	ordinary
KLHL12	DVL3	ordinary
ZCCHC11	EIF4A1	ordinary
ACVR2B	BMPR1A	ordinary
GNL3	PELP1	ordinary
PSMA4	OAZ2	ordinary
NME4	NADK2	ordinary
SDHD	FH	ordinary
FGFR3	ZMYM2	ordinary
RBBP7	PML	ordinary
MAP2K6	BOC	ordinary
POLB	PARP1	ordinary
GNPDA1	PFKL	ordinary
SLC6A9	ANO5	ordinary
SEC16A	COL7A1	ordinary
PSMB3	ANAPC7	ordinary
SLC25A16	ALDH6A1	ordinary
ENTPD8	ENTPD3	ordinary
ENTPD3	ENTPD8	ordinary
VPS28	PPIA	ordinary
ATG9B	BECN1	ordinary
HIST1H2BN	KDM4B	ordinary
CHAC1	OPLAH	ordinary
ADAMTS3	COL27A1	ordinary
TRPM2	ANXA1	ordinary
RIMKLB	FOLH1	ordinary
AGO4	NOTCH2	ordinary
PLK3	CDC25C	ordinary
SOS2	RHOC	ordinary
SLC4A2	SLC12A7	ordinary
NCALD	VDAC2	ordinary
CDS1	CDIPT	ordinary
PIGO	PIGU	ordinary
ACOT8	SCP2	ordinary
GNB2	CACNB2	ordinary
MKNK1	PPP2CB	ordinary
PPIA	NFATC2	ordinary
DNAL4	CLTA	ordinary
SH3KBP1	PIK3AP1	ordinary
HELZ2	FHL2	ordinary
ETNK2	PCYT2	ordinary
DENND4C	CHM	ordinary
TFPT	GPS1	ordinary
ARF4	KDELR2	ordinary
NUDT5	TKT	ordinary
FES	PLXNA3	ordinary
BHLHE41	PER2	ordinary
PNPLA7	GPCPD1	ordinary
TAP1	ERAP2	ordinary
DENND5B	RAB39B	ordinary
CSNK2B	NCAPG	ordinary
POLE	XRCC3	ordinary
IL7	IL7R	ordinary
DUSP3	MAPK7	ordinary
PLD1	DDHD1	ordinary
P2RX4	SORBS3	ordinary
SH3GL1	SH3KBP1	ordinary
PTGES2	CBR1	ordinary
SUV39H1	HIST1H2BG	ordinary
ALDOA	GNPAT	ordinary
ATP6V1F	NME2	ordinary
PTPN11	IFNAR2	ordinary
SLC7A11	GCLM	ordinary
GATAD2A	BRD1	ordinary
MTHFD2L	MTHFD2	ordinary
P3H2	COL14A1	ordinary
PAXIP1	DCLRE1C	ordinary
EXOSC3	NOL6	ordinary
UBE2M	FBXW11	ordinary
PSMC3IP	RPA1	ordinary
MMP10	MMP9	ordinary
FYN	FCER1G	ordinary
CDK7	TAL1	ordinary
NEK9	RAE1	ordinary
TLR3	CASP8	ordinary
MCFD2	SEC24A	ordinary
PPP3CC	YWHAH	ordinary
RIPK2	CARD11	ordinary
FRAT2	CSNK1A1	ordinary
POLD1	RPA3	ordinary
RGS4	GNAZ	ordinary
ITCH	NOD1	ordinary
B3GAT3	GPC3	ordinary
ARF5	COPA	ordinary
FANCG	UBE2T	ordinary
NCEH1	ABCA1	ordinary
CITED2	CREBBP	ordinary
RAD18	PCNA	ordinary
USP18	MX1	ordinary
GMPPB	GMDS	ordinary
PIGB	PIGO	ordinary
EPS15	DAB2	ordinary
C1R	C1S	ordinary
BBS10	BBS9	ordinary
LIN52	TOP2A	ordinary
EME2	BRIP1	ordinary
CTSD	COL18A1	ordinary
PPP3CB	PPP1R1B	ordinary
POMGNT2	DAG1	ordinary
ALDH1B1	ACSS1	ordinary
HIST1H2AC	HIST1H4H	ordinary
ARHGEF7	PAK1	ordinary
CHEK2	RNF8	ordinary
PYGL	PGM1	ordinary
PAPPA	IGFALS	ordinary
PICALM	VAMP2	ordinary
RRAGD	NOS3	ordinary
PAFAH1B1	BICD2	ordinary
TLL1	LOX	ordinary
AGMAT	SRM	ordinary
FZD5	DVL2	ordinary
ABCD4	ABCC1	ordinary
TMPRSS6	LAMC1	ordinary
PDSS1	COQ2	ordinary
MMP16	MMP14	ordinary
TIMP2	MMP2	ordinary
SLC19A1	MTRR	ordinary
FAM13B	CDC42	ordinary
GABPA	MTERF1	ordinary
COLGALT1	COL8A2	ordinary
EFNA1	NGEF	ordinary
MC1R	GNAS	ordinary
PSMD4	OAZ3	ordinary
SLC44A4	CHKA	ordinary
APBA1	UNC13B	ordinary
CDA	UPP1	ordinary
CNOT6	PAIP1	ordinary
SNX18	SYT11	ordinary
LY86	CD14	ordinary
VCP	HLA-A	ordinary
STRADB	PRKAG2	ordinary
MMP14	LAMB1	ordinary
SAP30	H2AFZ	ordinary
PARP9	NAMPT	ordinary
NSMCE1	SMC3	ordinary
PSMB4	NUMB	ordinary
EFNA4	VAV3	ordinary
MFNG	NOTCH4	ordinary
FZD7	PARD6A	ordinary
ATP1A3	KCNMA1	ordinary
GANAB	PDIA3	ordinary
MMP9	COL16A1	ordinary
MTMR3	PI4KA	ordinary
PRELID3A	CDS2	ordinary
LRP8	GPC4	ordinary
EFNA3	VAV2	ordinary
GPSM2	S1PR1	ordinary
ANO9	SLC26A6	ordinary
RPA3	HSPB1	ordinary
DSE	DCN	ordinary
TFG	SEC13	ordinary
SLC25A4	ATP6V1H	ordinary
EHMT2	TBP	ordinary
USP21	RNF31	ordinary
PTEN	GNG12	ordinary
E2F5	CCNA2	ordinary
SLC39A3	C1QBP	ordinary
WDR20	AR	ordinary
JAK1	IL10RA	ordinary
RDH16	ALDH1A3	ordinary
A2M	RHOB	ordinary
PLA2G16	PLBD1	ordinary
ACAT1	PCCA	ordinary
SLC2A1	GSTO2	ordinary
DENND1C	RAB8B	ordinary
CHST11	CSPG4	ordinary
NARFL	ERCC2	ordinary
CCT8	BBS5	ordinary
DOHH	EIF5A	ordinary
RBL2	CDC6	ordinary
MBOAT2	PEMT	ordinary
GNG7	DGKZ	ordinary
PSEN2	EPHB2	ordinary
BTD	PDZD11	ordinary
LCMT1	PPP2R3B	ordinary
ADRA2A	GNG7	ordinary
PIP4K2C	GNG2	ordinary
IPPK	PPIP5K2	ordinary
CASP6	SATB1	ordinary
FBXL5	IREB2	ordinary
DNMT3B	HIST1H2BD	ordinary
BLNK	DAPP1	ordinary
ESCO1	PDS5A	ordinary
CHD4	KAT6A	ordinary
LMAN2	SEC24B	ordinary
PIAS4	MTA1	ordinary
SMPD4	VAPB	ordinary
CDKN2D	CCND3	ordinary
ABHD14B	SULT1A2	ordinary
LOXL2	MFAP2	ordinary
ARF3	TMED2	ordinary
PDK2	DLD	ordinary
SERPINA5	VWF	ordinary
NLRX1	RNF135	ordinary
CDK2	MCM8	ordinary
MCM6	POLA1	ordinary
ATP6V1G1	AK5	ordinary
PRPS2	QPRT	ordinary
KCNK6	FXYD3	ordinary
PKM	LDHA	ordinary
TRMT112	GSPT2	ordinary
TCF3	MYB	ordinary
[truncated: 532 more rows]

## Sheet: COAD
gene1	gene2	type
SPPL2A	TNF	critical
ITGA4	ITGAL	critical
ITGAL	ITGA4	critical
SLC36A4	TDO2	critical
ABAT	ALDH5A1	critical
APIP	ENOPH1	critical
VCP	HLA-A	critical
KMT5A	PHF8	critical
SRM	DHPS	critical
EIF2AK3	EIF2S1	critical
LPGAT1	PLA2G4F	critical
PIGB	PIGF	critical
PIGL	PIGW	critical
EBP	SC5D	critical
PECR	PHYH	critical
PTPMT1	CRLS1	critical
SRD5A3	DOLK	critical
PMVK	MVD	critical
TAP1	ERAP1	critical
TAP2	ERAP2	critical
SBF2	RAB21	critical
ACAT2	HMGCS1	critical
RNF152	RRAGA	critical
CTSK	MMP7	critical
CTSD	COL18A1	critical
SLC22A11	OXGR1	critical
CFD	CFB	critical
ITGB3BP	MAPK8	critical
NANS	NANP	critical
PPCDC	COASY	critical
TFAP2A	TGFA	critical
TFAP2C	PITX2	critical
SLC44A1	CHDH	critical
COQ2	COQ6	critical
ALDH18A1	OAT	critical
IDUA	SGSH	critical
TMEM129	UBE2J2	critical
PGLS	PGD	critical
ATP7A	ATOX1	critical
MTHFD2	MTHFD2L	critical
ADSL	ATIC	critical
RALGDS	RALB	critical
AURKA	PHLDA1	critical
PHYKPL	ALDH7A1	critical
OTC	SLC25A15	critical
MCCC2	CA5B	critical
MANEA	B4GALT1	critical
WWOX	TFAP2C	critical
DMPK	PLN	critical
NGFR	SMPD2	critical
SLC25A10	MDH1	critical
ALG1	ALG2	critical
ALG6	ALG8	critical
FUK	FPGT	critical
PDX1	NR5A2	critical
LCAT	CEL	critical
AZIN2	AGMAT	critical
KIT	SH2B2	critical
CRK	KIDINS220	critical
LGMN	TLR7	critical
PKN1	PPP1R14A	critical
G6PD	PGLS	critical
HMOX1	BLVRA	critical
ALAD	HMBS	critical
PDXK	PNPO	critical
MTAP	APRT	critical
GMDS	TSTA3	critical
RPS6KA5	ATF1	critical
METTL22	KIN	critical
NSDHL	HSD17B7	critical
COX10	COX15	critical
TJP1	GJA1	critical
ACSM3	ACADS	critical
CUL1	BTRC	critical
IHH	SMURF2	critical
ZNF385A	SFN	critical
HMBS	UROS	critical
MAPK10	JUN	critical
PHYH	HACL1	critical
PPCS	PPCDC	critical
ATF2	MSH2	critical
TBC1D25	RAB33B	critical
SLC27A2	AMACR	critical
BTRC	PRLR	critical
IPMK	IP6K2	critical
AMD1	SMS	critical
LIAS	MARS2	critical
PRKCZ	SPHK1	critical
CTSB	COL15A1	critical
PCYT1A	CHPT1	critical
DTX4	ZBP1	critical
ECI1	MECR	critical
NR6A1	TDGF1	critical
FADS1	ELOVL5	critical
USP13	USP10	critical
USP10	SNX3	critical
USP19	RNF123	critical
BAP1	HCFC1	critical
PAPPA	IGFBP5	critical
RFK	FLAD1	critical
MST1	MST1R	critical
MTHFD1L	MTFMT	critical
SI	SLC2A5	critical
CAT	NUDT12	critical
ARSA	GALC	critical
PROS1	F5	critical
HYKK	PHYKPL	critical
NAE1	UBA3	critical
TSPO	FDX1	critical
RUNX2	LGALS3	critical
MSMO1	NSDHL	critical
PRSS2	DEFA5	critical
DCPS	NT5C3B	critical
AMY2B	SI	critical
MAN2B2	MANBA	critical
MAN2B1	MAN2B2	critical
LZTFL1	ARL6	critical
AKR1A1	CRYL1	critical
AMT	SHMT2	critical
PUM2	DCUN1D3	critical
BPHL	VARS	critical
LDLRAP1	LDLR	critical
HMOX2	BLVRB	critical
FGR	LRP8	critical
ITPK1	IPPK	critical
PGAM5	FUNDC1	critical
C1QBP	F12	critical
DHODH	UMPS	critical
ZBED1	CHD3	critical
CDS2	PGS1	critical
C8G	C7	critical
ESRRA	PERM1	critical
SQLE	LSS	critical
DGAT1	FITM2	critical
DGAT2	PNPLA4	critical
FOXM1	CENPF	critical
SH2B1	GHR	critical
PCK2	SLC25A1	critical
HSD3B7	PTGIS	critical
IL10RB	IL10RA	critical
NUDT3	NUDT4	critical
NUDT4	NUDT3	critical
UGDH	SLC35D1	critical
GLO1	HAGH	critical
HIF1A	RORA	critical
SLC31A1	ATP7B	critical
CHEK1	WEE1	critical
ADI1	GOT1	critical
CP	HEPH	critical
DENND3	RAB12	critical
PTS	SPR	critical
PIAS2	SUZ12	critical
SAE1	UBA2	critical
CERK	CPTP	critical
FPGS	SHMT1	critical
INPP5A	INPP1	critical
POU5F1	EPHA1	critical
CPT2	ACADVL	critical
VCPKMT	VCP	critical
PGM2	DERA	critical
PGM3	UAP1	critical
PDZD3	GUCY2C	critical
MAPK9	ATF2	critical
STK11	NUAK1	critical
FDX1	FDXR	critical
MMP19	LAMC2	critical
CPOX	PPOX	critical
ALG11	RFT1	critical
CDC25B	CDK2	critical
TXNRD1	SEPHS2	critical
XK	EDN3	critical
GPHN	MOCOS	critical
RWDD3	SAE1	critical
MYC	MAPKAPK5	critical
ENTPD1	ENTPD8	critical
ENTPD8	ENTPD1	critical
GNPNAT1	PGM3	critical
DEGS2	ACER3	critical
SGPL1	ALDH3B1	critical
UROS	UROD	critical
SERPINE2	VWF	critical
MCCC1	AUH	critical
ZDHHC2	CKAP4	critical
SMS	SAT1	critical
CFI	CR1	critical
F5	F8	critical
GSTZ1	FAH	critical
SGMS2	SMPD3	critical
HGS	STAM2	critical
HGD	GSTZ1	critical
BACE1	APP	critical
CSK	PDCD1	critical
CYP39A1	HSD3B7	critical
HACL1	ALDH3A2	critical
ENOPH1	ADI1	critical
PROC	F13A1	critical
SEPHS2	SEPSECS	critical
PCBD1	QDPR	critical
OTUB1	RNF128	critical
PRMT3	RPS2	critical
ACADS	ECHS1	critical
IFNGR2	IFNGR1	critical
ACADM	DECR1	critical
USP45	ERCC1	critical
USP47	POLB	critical
PPARGC1B	ATP5B	critical
VDAC3	MCU	critical
HMGCS1	HMGCR	critical
HMGCS2	HMGCL	critical
SORD	XYLB	critical
ACO1	IDH1	critical
DECR1	ECI1	critical
MOCS1	MOCS2	critical
JAK3	IL4R	critical
NMRAL1	ASL	critical
EIF2S1	ATF4	critical
KITLG	KIT	critical
SLC2A5	KHK	critical
ECHS1	HADH	critical
MADD	RAB27A	critical
CEACAM1	FN1	critical
CEACAM6	ITGA5	critical
CLU	C8G	critical
METTL21A	HSPA8	critical
SH2D2A	AXL	critical
ST8SIA4	NCAM1	critical
SALL4	SALL1	critical
PGS1	PTPMT1	critical
MTF1	CSRP1	critical
TBC1D16	RAB4A	critical
VKORC1L1	GGCX	critical
NPM1	NOP2	critical
GLS2	CPS1	critical
USP28	CLSPN	critical
ECSIT	MAP3K1	critical
PRSS3	REG3A	critical
ABCC3	FABP6	critical
RENBP	NAGK	critical
UPP1	DPYD	critical
CYBRD1	SLC11A2	critical
P4HB	IL23A	critical
MTHFD2L	MTHFD2	critical
RNF144A	UBE2L3	critical
OMA1	OPA1	critical
GRB10	INSR	critical
YAP1	ITCH	critical
RFT1	ALG3	critical
NCK1	MAPK11	critical
HPSE	IDUA	critical
CYB5R3	CYB5A	critical
USP8	LRIG1	critical
USP7	FOXO4	critical
TOMM40	PINK1	critical
PPRC1	TFAM	critical
GALK1	GALT	critical
STAT6	CCL11	critical
MAP2K3	MAPKAPK3	critical
MAP2K7	MAPK10	critical
MAP2K4	MAPK9	critical
NLRC5	IFIH1	critical
ALDOC	GPD1	critical
ALDOB	TKFC	critical
PHGDH	PSAT1	critical
ENPP1	ACP5	critical
UBC	RFC3	ordinary
RPS23	NOC4L	ordinary
VNN1	PANK1	ordinary
VAV3	PRKCD	ordinary
PAK2	MYLK	ordinary
HIST1H4I	EYA2	ordinary
HIST1H2BD	HIST1H3H	ordinary
COPS2	FEM1B	ordinary
ADCY4	PDE8A	ordinary
PDE8B	AMPD2	ordinary
DVL3	GNAO1	ordinary
EPHB1	TIAM1	ordinary
TP53	PIDD1	ordinary
TRAF1	TNFRSF1A	ordinary
XIAP	TLE3	ordinary
CD3D	ZAP70	ordinary
LCK	TYROBP	ordinary
PIAS4	MTA1	ordinary
RNF168	BARD1	ordinary
IL2RG	IL2RB	ordinary
AKT1	FOXO1	ordinary
MTMR14	PIGC	ordinary
PITPNM2	PLA2G2D	ordinary
ARHGAP24	RAC3	ordinary
RAC1	MYL12B	ordinary
EPN1	CLTB	ordinary
AP2B1	FZD5	ordinary
UBE2V1	TAB3	ordinary
TAB1	MAP2K7	ordinary
UNC13B	ARL6IP5	ordinary
SLC1A3	SLC25A12	ordinary
PSMB8	TNFSF13B	ordinary
PSMB6	NUMB	ordinary
LTBR	TRAF3	ordinary
SUPT5H	SNAPC4	ordinary
CHD3	EP300	ordinary
CA13	AQP11	ordinary
ATP6V0C	ARL2BP	ordinary
NKIRAS1	NFKBIB	ordinary
NFKB1	IL1A	ordinary
PKLR	ATP6V1C2	ordinary
RAB7A	ACTR10	ordinary
BCR	BAIAP2	ordinary
GNG10	ITPKA	ordinary
FGFR3	FGFR2	ordinary
SBF1	PIGP	ordinary
PLA2G4C	LPCAT4	ordinary
MPHOSPH6	NOP58	ordinary
SPCS1	RPL15	ordinary
MCOLN3	SORBS1	ordinary
EFNB3	LIMK1	ordinary
PAK1	CTNND1	ordinary
CATSPER2	TPM4	ordinary
COPS3	LRR1	ordinary
RHOQ	EXOC4	ordinary
AGPAT1	PLA2G4A	ordinary
PLA2G4A	PTGS2	ordinary
INPP5B	ITPK1	ordinary
SEC16A	COL7A1	ordinary
LMAN2	SEC24B	ordinary
RRAGA	AZIN2	ordinary
IGF2R	PLIN3	ordinary
ELL	GTF2H5	ordinary
RBBP4	ING5	ordinary
DHCR24	SREBF2	ordinary
NCOA2	ACOX1	ordinary
RHOB	PKN1	ordinary
RHOA	PKN3	ordinary
PSMD2	TNFSF12	ordinary
P4HA2	COL5A1	ordinary
PLA2G6	CYP2U1	ordinary
ACHE	SLC44A3	ordinary
SLC44A3	SLC44A1	ordinary
IRS2	WASF1	ordinary
PLCH2	DGKQ	ordinary
NPL	MPC1	ordinary
CACNA2D2	CACNA2D1	ordinary
ORAI1	MYL6	ordinary
MCRS1	RAD23A	ordinary
GGT5	DLG1	ordinary
DLG1	ATP2C1	ordinary
PSMB9	RELB	ordinary
CCS	SOD1	ordinary
SOD1	PRDX1	ordinary
GNA14	PRKCH	ordinary
DAGLB	MGLL	ordinary
ATP1B1	SLC9A1	ordinary
ANK1	CD55	ordinary
CDK11A	CEP72	ordinary
IL33	CUX1	ordinary
FGFR1OP2	ABI1	ordinary
RPS27L	DCAF13	ordinary
NECAP2	VAMP3	ordinary
PSMD11	BLMH	ordinary
RPS15A	RPS7	ordinary
PI4K2A	SH3GL1	ordinary
NECAP1	M6PR	ordinary
SMAD3	CDKN2B	ordinary
RPS19BP1	SIRT1	ordinary
CCNT1	SMAD2	ordinary
PTPN11	IFNAR2	ordinary
PLA2G2A	LPCAT1	ordinary
MBOAT7	PITPNM1	ordinary
SLC6A12	ANO10	ordinary
PSMF1	BUB1B	ordinary
TNFSF13B	BIRC3	ordinary
SPCS3	RPN2	ordinary
DDX58	IRF7	ordinary
IKBKG	NFKBIE	ordinary
AHCYL1	TMOD3	ordinary
CUX1	BRK1	ordinary
GRIN1	CPNE7	ordinary
ADAM10	JAG1	ordinary
CDK11B	ODF2	ordinary
BAG4	HSPA12B	ordinary
AKAP1	TPM2	ordinary
PPFIA1	SLC1A3	ordinary
COPS7A	DTL	ordinary
RPA2	HSPA1L	ordinary
GNB1	INPP5A	ordinary
PSMD1	CUL3	ordinary
ARL2BP	ADCY9	ordinary
IFT122	PDE7B	ordinary
ITPR2	STIM1	ordinary
ARF1	TMED3	ordinary
PSMC5	EGLN1	ordinary
PIK3R3	ARRB1	ordinary
MSRB2	MAT2A	ordinary
XRN1	LSM4	ordinary
PIK3CB	ITSN1	ordinary
EPN2	ITSN2	ordinary
NUP50	XPO1	ordinary
VAV2	ITPR3	ordinary
ALOX5	ALOX12	ordinary
LTA4H	CYP4F11	ordinary
PIK3C2B	FCHO1	ordinary
AP2A2	ROR1	ordinary
FRS2	CPSF6	ordinary
ERLIN2	GAB1	ordinary
PDGFRB	NCKAP1L	ordinary
FZD2	AMER1	ordinary
PPP2R5C	MARK3	ordinary
ERBB2	PLXNB1	ordinary
SOS1	PIK3R1	ordinary
PPP1CA	CSNK1E	ordinary
CHML	RAB23	ordinary
ORAI2	VDAC2	ordinary
HIST1H2BN	EYA3	ordinary
SUMO1	CDCA8	ordinary
YWHAB	FAM114A2	ordinary
COPS5	COMMD5	ordinary
CUL4B	ERCC6	ordinary
FCGR3A	GRB2	ordinary
DAB2	CD4	ordinary
SHC1	ITPR1	ordinary
AKT2	GSK3A	ordinary
DLG4	TPM1	ordinary
SLC25A5	ATP6V0B	ordinary
VAMP3	ARPC2	ordinary
SEPT2	RPGRIP1L	ordinary
RPA1	HSPH1	ordinary
ARPC1A	LDLRAP1	ordinary
LDLR	TFRC	ordinary
LCLAT1	ACSL3	ordinary
HDAC6	MID1IP1	ordinary
SYK	PIK3CD	ordinary
PLCB1	DGKE	ordinary
ITPR3	MYH11	ordinary
DVL2	HGS	ordinary
GNG5	ITPKB	ordinary
PSMD9	ANAPC5	ordinary
PSME2	CD40	ordinary
ATP6V0A1	DTYMK	ordinary
ARPC3	VAMP8	ordinary
TGOLN2	MYO10	ordinary
GPSM1	GPER1	ordinary
TPCN2	LMOD1	ordinary
PPFIA3	ACHE	ordinary
LRRFIP1	NCKAP1	ordinary
CASP8	PLEC	ordinary
MBD3	UBTF	ordinary
LAMTOR5	EEF1E1	ordinary
FNBP1L	SCARB2	ordinary
AAK1	INPP4A	ordinary
NUP214	SNRPB	ordinary
PLA2G4F	LPCAT2	ordinary
TCP1	BBS7	ordinary
RMI1	MNAT1	ordinary
GTF2H4	GTF2F2	ordinary
NOD1	MAP2K3	ordinary
CHUK	REL	ordinary
FCGR2A	CD86	ordinary
PSMD10	ANAPC10	ordinary
CHM	RAB22A	ordinary
OSBPL8	PLA2R1	ordinary
ARHGEF15	RHOJ	ordinary
SEC11C	SSR3	ordinary
DNAJB6	HSPA2	ordinary
CHAC2	OPLAH	ordinary
OPLAH	SLC25A22	ordinary
FTSJ3	DHX37	ordinary
KLRD1	BTK	ordinary
HK3	SLC37A2	ordinary
SLC37A4	G6PC3	ordinary
HLA-DPA1	CD3G	ordinary
VDAC1	MICU2	ordinary
PIP4K2A	SH2D2A	ordinary
PLCB3	PRKCZ	ordinary
INO80	DDB1	ordinary
COPS4	FBXL5	ordinary
SLC24A1	TRPM7	ordinary
PIP5K1A	PIK3CA	ordinary
PPIB	COL4A1	ordinary
CUL3	SPRED1	ordinary
EFNB2	PAK2	ordinary
ARAF	MACF1	ordinary
ARRB2	PTPN13	ordinary
ATP6V1C1	AK9	ordinary
PYGL	PGM1	ordinary
RYR2	DES	ordinary
ATP6V1H	NME1	ordinary
PYGB	UGP2	ordinary
TNKS1BP1	EIF4G1	ordinary
CACNB3	CACNB1	ordinary
TIGAR	PFKM	ordinary
GFPT1	GNPNAT1	ordinary
P2RX5	CPNE1	ordinary
HRAS	AGTRAP	ordinary
KSR1	RAF1	ordinary
ARPC2	VAMP2	ordinary
SLC24A3	P2RX7	ordinary
NAGS	CPT2	ordinary
GNB2	CACNB2	ordinary
SFRP2	FZD1	ordinary
NCALD	SRI	ordinary
SYNJ2	MTMR6	ordinary
PSMD5	CDC27	ordinary
ATP6V0E2	TSPAN7	ordinary
HLA-DPB1	LCK	ordinary
SP1	PMVK	ordinary
FDFT1	PLPP6	ordinary
NFIA	POLR3E	ordinary
UBE2D1	TLR4	ordinary
PAFAH1B2	DYNC1LI2	ordinary
ARPC5	VAMP4	ordinary
EIF5	EIF3J	ordinary
CFTR	SLC4A8	ordinary
ISG15	KPNA2	ordinary
FBXL18	FBXL7	ordinary
EPHB6	LIMK2	ordinary
INPPL1	BIN1	ordinary
SSU72	NABP2	ordinary
PSMA2	ANAPC16	ordinary
MTOR	SGK1	ordinary
BAG1	HSPA12A	ordinary
LCP2	RASGRP4	ordinary
MBTPS1	ATF6	ordinary
GMPR2	IMPDH2	ordinary
ADSS	ADSL	ordinary
ARFGAP2	YKT6	ordinary
ERCC6	TAF1D	ordinary
RAB3A	SLC1A7	ordinary
SLC1A7	RIMKLA	ordinary
GATAD2B	BRPF3	ordinary
HLA-DRA	CD3D	ordinary
PRKCQ	GNB5	ordinary
IRS1	FGFR4	ordinary
SEC24D	SEC31A	ordinary
PIK3AP1	TRIM24	ordinary
B3GAT3	GPC4	ordinary
ACSL5	ZDHHC21	ordinary
PDGFA	PDGFRA	ordinary
RAB43	STX6	ordinary
HOXA1	WDR5	ordinary
BLMH	TAP1	ordinary
NRAS	KIAA1549	ordinary
AK2	SLC25A5	ordinary
TYROBP	LAT2	ordinary
ALS2CL	GDI2	ordinary
OXCT1	SDHA	ordinary
SPTBN1	ARCN1	ordinary
ATP6V1A	ARL2	ordinary
BAG3	HSPA6	ordinary
INO80E	COPS2	ordinary
RBX1	SPRED2	ordinary
CDKN1B	ORC6	ordinary
TCIRG1	PICK1	ordinary
PSMC4	SPOP	ordinary
KAT5	FANCA	ordinary
SEC24C	SEC23IP	ordinary
VAMP7	SH3D19	ordinary
B3GLCT	ADAMTS12	ordinary
PSMA6	CKS1B	ordinary
ANAPC16	FZR1	ordinary
FCGR1A	FGF7	ordinary
SUPT4H1	POLR2G	ordinary
DNAJC6	SNX2	ordinary
CTR9	UBE2A	ordinary
SPTLC1	AASDHPPT	ordinary
KDSR	CERS6	ordinary
FBXW11	MAP3K8	ordinary
NFKB2	IL1B	ordinary
TRPM7	SLC24A1	ordinary
PLBD1	LPCAT3	ordinary
LNPEP	HLA-G	ordinary
GNAI2	CD209	ordinary
INO80D	COPS6	ordinary
COMMD5	NEDD8	ordinary
UBE2N	PELI1	ordinary
SCNN1D	CAMK2D	ordinary
TNKS2	PTEN	ordinary
ERCC1	RFC4	ordinary
ATG12	ATG10	ordinary
MYO18A	CYFIP1	ordinary
TOP3A	FANCG	ordinary
SEC11A	RPS17	ordinary
CYCS	CASP9	ordinary
DCTN4	PTGES3	ordinary
PSMC6	SKP2	ordinary
IPPK	PPIP5K1	ordinary
PPP3CA	NFATC3	ordinary
CH25H	NCOA1	ordinary
ATG101	DYNLL2	ordinary
RPS27	RRP9	ordinary
WRN	REV3L	ordinary
GTF2H5	POLR2I	ordinary
AP2M1	GRIP1	ordinary
KBTBD7	NF1	ordinary
RELB	NFKB2	ordinary
MAT2A	TRMT11	ordinary
GAMT	CKMT1B	ordinary
DIAPH2	KNTC1	ordinary
ARF4	COPB1	ordinary
PRKAB1	TBC1D1	ordinary
RANBP2	KPNA5	ordinary
GNB4	CACNA1D	ordinary
ZMYM2	ABI2	ordinary
SLC35B4	GCNT4	ordinary
GPS1	FBXW9	ordinary
PEBP1	ITGB3	ordinary
NFRKB	COPS4	ordinary
TEC	TRPC1	ordinary
IL1B	MAP3K3	ordinary
PSME1	BUB3	ordinary
ARHGEF17	RHOBTB2	ordinary
GNAS	PRKAR2B	ordinary
CNIH1	SAR1B	ordinary
ATP2A2	NOTCH3	ordinary
EP300	TNFRSF21	ordinary
NFIB	POLR3K	ordinary
DYNC1H1	HSP90AA1	ordinary
CLCN3	ANO6	ordinary
GLUL	CTPS2	ordinary
GFPT2	BCAT1	ordinary
AK7	ADCY5	ordinary
ATP6V1B2	SLC25A4	ordinary
APP	ACTA2	ordinary
MYH3	EXOC7	ordinary
RNF4	BRCC3	ordinary
NME2	ADCY3	ordinary
FAM20A	TMEM132A	ordinary
OCRL	MTMR1	ordinary
TBL1X	PEX11A	ordinary
MAP2K2	AGGF1	ordinary
ARL2	ATP6V1F	ordinary
PPP2R1A	PPP2R5C	ordinary
LAT2	FYN	ordinary
GTF2H2	POLR2D	ordinary
RBBP8	FANCC	ordinary
TSC2	MLST8	ordinary
CTSC	CD74	ordinary
SUMF2	ARSG	ordinary
SLC39A7	MT1F	ordinary
FYN	FCER1G	ordinary
GPR161	PDE2A	ordinary
RAPGEF4	RAP1A	ordinary
CPT1B	SLC25A20	ordinary
ACSL1	PPARD	ordinary
TPCN1	VCL	ordinary
SPCS2	SEC61G	ordinary
PSMA4	OAZ2	ordinary
PIK3R4	FIG4	ordinary
SLC12A7	SLC12A2	ordinary
SLC6A4	MAOA	ordinary
CYP51A1	MSMO1	ordinary
ATP6AP1	SLC25A6	ordinary
PRKCSH	CALR	ordinary
POM121	GEMIN5	ordinary
SYT1	SLC1A1	ordinary
SUMF1	ARSD	ordinary
CBLB	NCK1	ordinary
GNAI3	IQGAP1	ordinary
MTMR6	PIP4K2A	ordinary
GPAT4	GPAT3	ordinary
AGPAT4	CDS1	ordinary
POLR2J	EPAS1	ordinary
RFC1	PALB2	ordinary
PDGFB	PDGFRB	ordinary
PTPN6	LYN	ordinary
CASP1	IL18	ordinary
RPS24	UTP14A	ordinary
FAM114A2	MAP2K2	ordinary
PDPK1	RPS6KA3	ordinary
MTMR8	PLA2G10	ordinary
BIN1	SLC2A8	ordinary
CSF2RA	CSF2RB	ordinary
SLC5A9	HK2	ordinary
SLC2A3	GSTO1	ordinary
MAPKAPK2	ZFP36	ordinary
CSNK2B	NCAPH	ordinary
KLHL12	DVL1	ordinary
TRAPPC1	RAB1B	ordinary
MED1	RGL1	ordinary
ATP1A3	KCNMB1	ordinary
IFNAR2	IFNAR1	ordinary
TYK2	IL27RA	ordinary
SIRT3	IDH2	ordinary
SOD2	PRDX5	ordinary
GLS	ALDH18A1	ordinary
POM121C	CPSF3	ordinary
POLE4	XRCC2	ordinary
RAD50	ERCC8	ordinary
SOCS1	MYD88	ordinary
TLR2	TIRAP	ordinary
FOLH1	TTLL7	ordinary
IL2RB	STAT5A	ordinary
AMACR	ACOX3	ordinary
AGPAT2	LPIN2	ordinary
UBE2V2	SUMO2	ordinary
ACSL3	ZDHHC8	ordinary
TFRC	PIP5K1B	ordinary
UBQLN2	AAK1	ordinary
ADCY7	PDE1B	ordinary
GUCY1B3	PDE5A	ordinary
CDH1	SRC	ordinary
PSMC3	TNKS2	ordinary
PNPLA2	AQP3	ordinary
AQP3	CD38	ordinary
CSNK1D	SEC22A	ordinary
HDAC1	MEAF6	ordinary
ALOX12	GPX4	ordinary
PRKAG1	LAMTOR3	ordinary
RRAGB	MARS	ordinary
ASL	CALM3	ordinary
SMURF1	SMAD9	ordinary
ERBB3	FGFR1OP	ordinary
CNTRL	SOS1	ordinary
HGF	FGF2	ordinary
SPTAN1	COPZ1	ordinary
GATAD2A	BRD1	ordinary
JAK2	ZC3HAV1	ordinary
FBP1	PFKFB2	ordinary
GPSM3	C3AR1	ordinary
PSMD8	RNF146	ordinary
PTK6	STAP2	ordinary
CDKN1C	TFDP1	ordinary
DNM1	CLTA	ordinary
AP2A1	ROR2	ordinary
USP15	SMAD1	ordinary
GFER	CHCHD5	ordinary
ATP6V0A2	ABCC4	ordinary
PITPNM1	PLA2G12A	ordinary
ANKRD28	SEC24A	ordinary
ACOT1	ACSL6	ordinary
PIK3CA	PICALM	ordinary
TFPT	GPS1	ordinary
PIP4K2B	GNG2	ordinary
SLC25A1	ACO2	ordinary
DNAL4	AP2A2	ordinary
AP2S1	GRIP2	ordinary
INPP4B	MTMR9	ordinary
HIST1H2BK	HIST1H4I	ordinary
RPS3A	UTP18	ordinary
GGPS1	FDPS	ordinary
NCOA6	GRHL1	ordinary
CTH	SERINC1	ordinary
NADK2	MCCC2	ordinary
RIC1	RAB6B	ordinary
ARHGEF12	RHOG	ordinary
TGFBR2	TGFBR1	ordinary
SMAD2	JUNB	ordinary
PSMD3	CDC16	ordinary
MCOLN1	ACTG2	ordinary
DDX41	IRF3	ordinary
IDH1	WTIP	ordinary
RPS28	HEATR1	ordinary
EFNB1	GIT1	ordinary
RRAGD	EPRS	ordinary
RPS6KB1	EEF2K	ordinary
PCF11	RPAP2	ordinary
STAT2	STAT1	ordinary
CNOT6L	EIF4B	ordinary
NOS2	GUCY1B3	ordinary
ACTR2	VAMP7	ordinary
PSMB10	UBE2C	ordinary
CD86	FCGR2A	ordinary
ITK	INPP5B	ordinary
IKBKB	CYLD	ordinary
CHST2	PRELP	ordinary
TPR	WDR33	ordinary
HLA-DQA1	LCP2	ordinary
NAA30	ARFRP1	ordinary
HS6ST1	GPC2	ordinary
PIK3R6	FNBP1	ordinary
PIK3C2A	PIKFYVE	ordinary
GMPR	IMPDH1	ordinary
IP6K1	PPIP5K2	ordinary
ATM	POLK	ordinary
INO80C	COPS5	ordinary
HMGCR	MVK	ordinary
RGS3	GNA11	ordinary
VAMP4	ARPC5	ordinary
CATSPERB	STXBP1	ordinary
USP4	TAB2	ordinary
DDC	COMT	ordinary
RARRES3	PNPLA7	ordinary
SLC25A16	ALDH6A1	ordinary
CCZ1	RAB7B	ordinary
SLC38A9	RARS	ordinary
RIN3	RAB31	ordinary
ULK1	DENND3	ordinary
PRKCA	STXBP3	ordinary
PDZD11	HLCS	ordinary
PANK4	PPCS	ordinary
PIP4K2C	GNG12	ordinary
POLD3	BLM	ordinary
CERS2	DEGS1	ordinary
FURIN	MMP11	ordinary
PPP3R1	YWHAQ	ordinary
GSS	GSTM3	ordinary
RUNX3	LEF1	ordinary
SIGIRR	TLR1	ordinary
HLA-DRB1	CD247	ordinary
EPHA4	EFNA5	ordinary
CHST11	BGN	ordinary
PLCH1	PRKCA	ordinary
HSD17B4	SCP2	ordinary
SLC4A7	NCOA2	ordinary
HLA-DQB1	CD3E	ordinary
GCLC	GGCT	ordinary
GPX8	P4HB	ordinary
TFG	SEC23A	ordinary
CASP6	LMNB1	ordinary
SLC25A6	MB21D1	ordinary
HIP1	FZD4	ordinary
TTC21B	AKAP5	ordinary
RPS11	DDX49	ordinary
SLC39A1	S100A9	ordinary
GAPVD1	RAB5B	ordinary
ERAP2	B2M	ordinary
MVD	IDI1	ordinary
IDI1	GGPS1	ordinary
MTA3	TAF1B	ordinary
PDHB	ACAA2	ordinary
TSC1	MTOR	ordinary
SUCLA2	HADHB	ordinary
AGBL2	LRRC49	ordinary
L2HGDH	DLST	ordinary
TRRAP	TCF4	ordinary
SLC12A4	SLC4A3	ordinary
BRAP	BRAF	ordinary
CCZ1B	RAB7A	ordinary
CYP4F11	CYP4F3	ordinary
DAPP1	DGKZ	ordinary
SREBF2	SQLE	ordinary
TMLHE	SDHD	ordinary
LRP12	GPC6	ordinary
GLE1	NUP107	ordinary
EPHA3	EFNA1	ordinary
STRADA	PRKAA1	ordinary
PRKAA1	LAMTOR2	ordinary
RPS8	RPS9	ordinary
GDA	RHCG	ordinary
MARC1	IARS	ordinary
BRAF	AGK	ordinary
ACTB	COPS8	ordinary
LIN7A	PPFIA4	ordinary
EPS15	DAB2	ordinary
RAB33B	MAN1A2	ordinary
CLTC	CPD	ordinary
HIP1R	SYT8	ordinary
AKR1B1	SORD	ordinary
IDH2	AADAT	ordinary
FAR1	AGPS	ordinary
ADAM17	NRG1	ordinary
GGCX	VKORC1L1	ordinary
PLD3	PITPNM2	ordinary
CTSL	HLA-C	ordinary
SPRED1	RASAL2	ordinary
MUS81	KAT5	ordinary
GUK1	TTC21B	ordinary
LAMTOR4	MAF1	ordinary
USP21	RNF31	ordinary
TAB3	MAP3K7	ordinary
PLCB2	RASGRP2	ordinary
MTA2	BRPF1	ordinary
PFKP	ALDOA	ordinary
MICAL1	GSTP1	ordinary
ALDH1A3	CRABP2	ordinary
BIRC3	RIPK2	ordinary
MRS2	PDHX	ordinary
TOMM22	ATP5G1	ordinary
REEP1	GNB1	ordinary
SIRT1	CLOCK	ordinary
LHPP	SLC25A10	ordinary
PIK3R1	FNBP1L	ordinary
MMAA	SUCLG2	ordinary
EXOSC10	WDR75	ordinary
BRCC3	NLRP3	ordinary
PARP16	NNMT	ordinary
CHCHD4	TIMM8A	ordinary
TRPV2	TLN1	ordinary
CCND2	E2F3	ordinary
TFDP2	CDT1	ordinary
LAMTOR1	SLC3A2	ordinary
CASK	PPFIA1	ordinary
SOCS5	CUL5	ordinary
WTAP	NCBP2	ordinary
RAB3GAP1	DCTN1	ordinary
PNP	XDH	ordinary
CACNA2D4	DMD	ordinary
KDR	ROCK2	ordinary
ROCK2	PPP1CB	ordinary
MSRB1	MAT1A	ordinary
GNPDA2	GFPT1	ordinary
RPE	PPP2CA	ordinary
OSBPL5	SACM1L	ordinary
IFT140	PRKACB	ordinary
PNPLA8	MBOAT1	ordinary
CREBBP	PPARA	ordinary
LPIN3	DGAT2	ordinary
HK1	G6PD	ordinary
HLA-E	FCGR3A	ordinary
CDC73	UBE2B	ordinary
PIGF	PIGK	ordinary
ARF5	COPA	ordinary
NEURL1	DLL1	ordinary
ACTR8	COPS7B	ordinary
AGO3	RUNX1	ordinary
GLUD1	OGDH	ordinary
ANO1	SLC26A3	ordinary
SLC6A7	BEST4	ordinary
C1D	WDR43	ordinary
ABHD12	PLD1	ordinary
ABCB7	ABCG2	ordinary
BBS12	BBS9	ordinary
JUN	IGFBP7	ordinary
MBOAT2	PEMT	ordinary
IP6K2	IP6K1	ordinary
P2RX7	CALD1	ordinary
PARN	EIF4A3	ordinary
MMP9	COL16A1	ordinary
PSENEN	NGFR	ordinary
CRTAP	COL1A1	ordinary
SLC35A1	ST6GALNAC6	ordinary
SLC5A1	SLC2A1	ordinary
TNRC6B	NLK	ordinary
SLX4	BRCA2	ordinary
RPTOR	ULK1	ordinary
PPFIA4	RAB3A	ordinary
TMED5	WNT2B	ordinary
IRAK4	PELI2	ordinary
SOAT1	ACLY	ordinary
ITSN2	ACTR2	ordinary
CYB5RL	SLC40A1	ordinary
BCAT1	EGLN3	ordinary
YES1	BTC	ordinary
SNX18	SYT11	ordinary
EPHA2	EFNA3	ordinary
ADCY1	PDE4D	ordinary
CHKA	PCYT1A	ordinary
PLCB4	SYNJ1	ordinary
ITPKC	INPPL1	ordinary
SLC50A1	SLC5A9	ordinary
MAP3K11	ARAF	ordinary
VDAC2	MICU1	ordinary
PSEN2	EPHB3	ordinary
MTRR	FPGS	ordinary
TYMS	DHFR	ordinary
RALGAPB	RALA	ordinary
PLXNA4	DPYSL3	ordinary
KYNU	SLC1A5	ordinary
RPS27A	POLD2	ordinary
CD28	VAV1	ordinary
HSBP1	MRPL18	ordinary
LIN7C	STX1A	ordinary
PI4K2B	REPS2	ordinary
PPM1K	DBT	ordinary
SOCS3	LEPR	ordinary
ATP6V0B	GUK1	ordinary
DHFR	CALM1	ordinary
AGMO	AQP7	ordinary
PIAS3	MITF	ordinary
SH3GL1	SH3KBP1	ordinary
AGBL5	TTLL1	ordinary
SLC25A13	ASNS	ordinary
REEP4	GNAL	ordinary
RNF111	ERCC3	ordinary
PRKCH	GNAZ	ordinary
BIRC2	NOD1	ordinary
LCMT1	PPP2R3B	ordinary
PPP2R2A	FOXM1	ordinary
TREM2	FGFR1OP2	ordinary
LPCAT2	STARD7	ordinary
HAGH	CHAC1	ordinary
ST13	HSPA9	ordinary
CLOCK	BHLHE41	ordinary
HBS1L	PPAT	ordinary
RNF181	BCL10	ordinary
UBE2D2	TLR3	ordinary
PSMA3	CDC26	ordinary
PIGO	PIGS	ordinary
ACOT2	GCAT	ordinary
CHMP5	CHMP2B	ordinary
SLC4A3	SLC12A4	ordinary
ANO6	SLC6A6	ordinary
STAG1	STAG2	ordinary
DGKQ	LPIN3	ordinary
BCAT2	GPT2	ordinary
ERCC4	TOPBP1	ordinary
LMAN1	SEC24D	ordinary
DDAH2	ASS1	ordinary
TOMM7	BCS1L	ordinary
IDH3G	AASS	ordinary
STAT3	IL6R	ordinary
CEBPD	EBF1	ordinary
ATF4	HERPUD1	ordinary
PTPN22	HLA-DQA1	ordinary
LYN	CD22	ordinary
NR1D1	NPAS2	ordinary
DDX6	LSM6	ordinary
HSCB	GLRX5	ordinary
THBD	PROCR	ordinary
BEST1	CA12	ordinary
SPR	PAH	ordinary
NOS3	GUCY1A3	ordinary
MTMR2	PITPNB	ordinary
FKBP1A	NFATC1	ordinary
MFSD2A	AHCYL2	ordinary
NBN	TCEA1	ordinary
VTA1	CHMP4C	ordinary
PPARG	CD36	ordinary
FGF13	SLC4A4	ordinary
MAML2	HEY1	ordinary
CCNT2	ATR	ordinary
E2F2	EZH2	ordinary
CNOT8	PAIP1	ordinary
TNIK	MAP3K5	ordinary
GLB1	PSAP	ordinary
SPHK2	PLPP3	ordinary
SPIDR	EXO1	ordinary
FOS	KDM6B	ordinary
HHAT	SHH	ordinary
NPAS2	KLF15	ordinary
PLA2G16	PLBD1	ordinary
SLC39A4	GPR39	ordinary
NFIX	POLR1C	ordinary
PI4KB	ARF1	ordinary
GSR	CHAC2	ordinary
DLD	SUCLA2	ordinary
TNFAIP3	TRAF1	ordinary
SLC39A3	C1QBP	ordinary
PIK3C3	RUFY1	ordinary
ATP1A1	KCNAB1	ordinary
RABGGTA	RAB24	ordinary
TRPA1	DYSF	ordinary
LDHA	SLC16A1	ordinary
MTR	LARS	ordinary
DLG3	SLC8A1	ordinary
BAG5	HSPA13	ordinary
AASS	GOT2	ordinary
TOR1A	STON2	ordinary
GTF2H1	NCBP1	ordinary
NUP153	FIP1L1	ordinary
PGM2L1	PGP	ordinary
MYH7B	MYO1C	ordinary
PSMB3	ANAPC11	ordinary
EFNA1	NGEF	ordinary
FZR1	MCM5	ordinary
DNAJC7	HSPA4	ordinary
TTF1	TAF1A	ordinary
FAM20C	MFGE8	ordinary
COASY	SLC25A16	ordinary
SPTLC2	KDSR	ordinary
ABCD1	DPM2	ordinary
MMP2	SCUBE3	ordinary
DLAT	CS	ordinary
FGFR1OP	FGF18	ordinary
ARSB	IDS	ordinary
RAB10	EXOC1	ordinary
CDK5R1	CDC25B	ordinary
TECR	CERS5	ordinary
HEY1	HEYL	ordinary
MIB2	JAG2	ordinary
POFUT2	ADAMTS1	ordinary
CNOT3	EIF4A2	ordinary
USP1	DCLRE1B	ordinary
CHD9	GLIPR1	ordinary
MAT2B	INMT	ordinary
APH1A	EPHB4	ordinary
GCHFR	PTS	ordinary
COQ9	COQ3	ordinary
ORMDL1	ATAT1	ordinary
PPA2	SUCLG1	ordinary
PSMC1	MAD2L1	ordinary
ADRA2C	GNG11	ordinary
RPS13	RPS14	ordinary
ABCA3	ADRA2C	ordinary
CHD4	KAT6A	ordinary
PIK3R2	SNX18	ordinary
CCAR2	SERPINH1	ordinary
ACTR1B	DCTN2	ordinary
CAPZA1	HSP90AB1	ordinary
SLC5A3	SLC9A6	ordinary
CDIPT	PIGQ	ordinary
NADSYN1	NICN1	ordinary
TBL1XR1	TIAM2	ordinary
CDC37	ZMYM2	ordinary
ALDH1B1	ACSS1	ordinary
GGT1	DPEP2	ordinary
OTUD5	MAVS	ordinary
SRC	QKI	ordinary
RAB11A	EXOC3	ordinary
RPS6KA2	L1CAM	ordinary
GUCY1A2	PDE1A	ordinary
MGAT1	MAN2A1	ordinary
ASNA1	SEC61B	ordinary
B4GALT3	FMOD	ordinary
AK9	WDR35	ordinary
NOL12	SNU13	ordinary
RGS1	GNAI2	ordinary
RAB3GAP2	DYNC1I2	ordinary
HEXB	NEU1	ordinary
MAP2K1	PAPD7	ordinary
ALDH2	ACSS3	ordinary
APH1B	DTX4	ordinary
TOR1B	STON1	ordinary
SAP30BP	H3F3B	ordinary
KPNA1	HMGA1	ordinary
EIF1AX	RPL6	ordinary
NUP88	GEMIN4	ordinary
UBXN7	DCUN1D1	ordinary
QDPR	AGMO	ordinary
PFKL	ALDOC	ordinary
NMRK1	NMNAT2	ordinary
MAPK1	ELK1	ordinary
ARFGAP3	USO1	ordinary
RB1	MCM7	ordinary
GEN1	WRN	ordinary
MAP3K7	CHUK	ordinary
MTMR4	VAC14	ordinary
LRP6	FZD6	ordinary
TRAF6	ITGB3BP	ordinary
LDHB	BSG	ordinary
TOMM5	CYC1	ordinary
DNAJB1	HSPA1A	ordinary
SHMT1	ALDH9A1	ordinary
IDH3B	SLC25A11	ordinary
C9orf3	SLC7A6	ordinary
SAV1	LATS2	ordinary
UBE2B	UBE2N	ordinary
LPIN1	PNPLA2	ordinary
RPS6KA3	CREB1	ordinary
SLC25A26	MRM1	ordinary
CSNK2A1	NCAPD2	ordinary
SLC25A11	LIMD1	ordinary
HS3ST1	SDC4	ordinary
HERC2	KDM4A	ordinary
NUP54	HNRNPC	ordinary
RPS16	IMP3	ordinary
FIG4	MTM1	ordinary
MCAT	NDUFAB1	ordinary
NPEPPS	TAP2	ordinary
IDS	HEXB	ordinary
HEXA	CTSA	ordinary
NFIC	POLR3C	ordinary
HIPK2	CBFB	ordinary
PTPN18	ERBB2	ordinary
SLC6A8	CKB	ordinary
NFYC	TM7SF2	ordinary
LTB	TRAF2	ordinary
TPST2	PODXL2	ordinary
SGIP1	KIAA0319	ordinary
CALM3	IQGAP2	ordinary
SDHB	FH	ordinary
AGPAT3	PAFAH1B3	ordinary
PFKM	ALDOB	ordinary
ANO8	SLC6A9	ordinary
RBL2	E2F1	ordinary
ALDOA	GNPAT	ordinary
GLB1L	GBA	ordinary
BBS10	BBIP1	ordinary
DYNC2H1	GLI3	ordinary
DEK	APOE	ordinary
INMT	AHCY	ordinary
REEP6	OR51E1	ordinary
CLTA	BLOC1S1	ordinary
PHB	KSR1	ordinary
ERAP1	TAPBP	ordinary
PTGS2	PTGS1	ordinary
CACNA1C	SPARC	ordinary
GOT2	DARS2	ordinary
PDP2	DLAT	ordinary
PTK2	WASL	ordinary
VAV1	INPP5D	ordinary
SREBF1	SCD	ordinary
CCND3	E2F5	ordinary
LPIN2	PRKCB	ordinary
DLST	ALAS1	ordinary
UBA52	RFC1	ordinary
GALNT7	MUC5AC	ordinary
UBE2M	FBXW11	ordinary
EGLN3	HIF3A	ordinary
NAA38	SLC27A5	ordinary
PCGF2	UBE2I	ordinary
TAX1BP1	XIAP	ordinary
TRADD	RIPK3	ordinary
INPP1	IMPA1	ordinary
INPP4A	SBF2	ordinary
RB1CC1	PIK3C3	ordinary
CLCN6	ARHGEF9	ordinary
LAMTOR2	RPS6KB1	ordinary
MMP12	COL12A1	ordinary
CCNH	TCF3	ordinary
PTPN1	APBB1IP	ordinary
CEPT1	PNPLA8	ordinary
PLD2	PITPNM3	ordinary
SACM1L	PIGA	ordinary
GAB2	CNTRL	ordinary
CLCN7	ANO7	ordinary
CARM1	TRIB3	ordinary
NCEH1	ABCA1	ordinary
ABCG1	PLTP	ordinary
WDR35	PDE8B	ordinary
PSMA5	ANAPC15	ordinary
ATF6	HSP90B1	ordinary
UBB	RFC2	ordinary
NRP1	DPYSL2	ordinary
ACOT13	HDAC8	ordinary
FGF7	INPP5J	ordinary
POLE	TOP3A	ordinary
APAF1	CASP7	ordinary
SCMH1	CBX4	ordinary
NEK9	NUP205	ordinary
POLH	DNA2	ordinary
PPP3CC	BAD	ordinary
HMGB2	H1F0	ordinary
ATG9A	ATG14	ordinary
GCLM	GSS	ordinary
PSMD4	OAZ3	ordinary
BAG2	HSPA4L	ordinary
CYB5R4	FTH1	ordinary
PSMD6	UBE2E1	ordinary
GNS	HEXA	ordinary
PIP5K1C	PLCE1	ordinary
ALG12	ALG9	ordinary
ALG9	ALG6	ordinary
MVB12A	UBA52	ordinary
AGFG1	ACTR3	ordinary
BLNK	DAPP1	ordinary
PDK3	PDHA1	ordinary
LIN7B	PPFIA3	ordinary
ITGAV	VEGFA	ordinary
PARP10	NAMPT	ordinary
SCAI	ITGB1	ordinary
DNM3	AP2S1	ordinary
CD3G	CD28	ordinary
ANO9	SLC26A6	ordinary
MYO9A	RHOT1	ordinary
TRPC1	PPP3CB	ordinary
FAAH	CYP2J2	ordinary
SLC30A6	SOD3	ordinary
JAK1	IL7R	ordinary
GNA15	DAGLB	ordinary
TRAPPC11	CHML	ordinary
CD247	ITK	ordinary
IRAK3	TLR2	ordinary
TIRAP	IRAK2	ordinary
FCHO2	PLEKHA1	ordinary
VPS4A	CHMP3	ordinary
SLC38A1	SLC38A2	ordinary
PPP2R5A	PDPK1	ordinary
WDR19	PRKAR1A	ordinary
AXIN1	LRP5	ordinary
RORA	SREBF1	ordinary
ABCA1	CPNE3	ordinary
CNOT7	EIF4E	ordinary
INSR	PPP2R1B	ordinary
PPP2R1B	RBL2	ordinary
CAB39L	PRKAB2	ordinary
PRKAB2	TSC1	ordinary
PLAT	PDGFD	ordinary
SLC8B1	P2RX4	ordinary
PPP2R5E	YWHAB	ordinary
FRAT2	PPP2R5A	ordinary
AMER1	CTNNB1	ordinary
PMPCB	GRPEL2	ordinary
EP400	UBN1	ordinary
SMAD4	BCL2L11	ordinary
SIAH2	SNCAIP	ordinary
PSMB4	ANAPC7	ordinary
PIK3R5	ARRB2	ordinary
AGPAT5	PRELID3A	ordinary
RPS5	FBL	ordinary
AKT3	FOXO3	ordinary
GUSB	GLB1	ordinary
PAPSS1	SLC35B3	ordinary
GZMH	IGFBP3	ordinary
GYS1	GYG1	ordinary
PF4	PROC	ordinary
ST3GAL6	LUM	ordinary
ALDH5A1	SDHC	ordinary
STUB1	CDC37	ordinary
DLC1	RHOQ	ordinary
ABCC9	ATP1B1	ordinary
THEM4	ACSF2	ordinary
APRT	LHPP	ordinary
PLD4	LIPH	ordinary
MAPK14	CBX8	ordinary
OSBP	SGMS1	ordinary
VNN2	PANK3	ordinary
XRCC1	XAB2	ordinary
CSGALNACT2	VCAN	ordinary
PI4KA	PIK3C2A	ordinary
EFNA4	VAV3	ordinary
AQP1	NT5E	ordinary
ARHGAP9	RHOH	ordinary
HCK	FCGR1A	ordinary
CBL	TGFBR2	ordinary
MTFMT	MTHFD1L	ordinary
ATG13	AMBRA1	ordinary
GUCY1A3	PRKG1	ordinary
CCNG1	MDM2	ordinary
PSMB1	OAZ1	ordinary
PTDSS2	OSBPL8	ordinary
UBE2D3	SMAD5	ordinary
PIAS1	SATB1	ordinary
PSMD13	TNFRSF12A	ordinary
TIMM17A	FXN	ordinary
YY1	RAD23B	ordinary
DEGS1	PPM1L	ordinary
NF1	RASA1	ordinary
REPS1	IGF2R	ordinary
IL3RA	STAT5B	ordinary
CD274	HLA-DRB1	ordinary
IFNAR1	JAK1	ordinary
DCP1B	LSM2	ordinary
ROCK1	PPP1R12A	ordinary
TLR6	IRAK4	ordinary
GMPPA	DPM3	ordinary
PTPRK	CBL	ordinary
SLC26A6	ANO9	ordinary
NSMCE1	SMC3	ordinary
CASP3	STK4	ordinary
CNDP2	NFS1	ordinary
SKIV2L2	UTP15	ordinary
TKFC	TALDO1	ordinary
TPI1	GPD1L	ordinary
NUP98	KPNB1	ordinary
PEX3	ABCD3	ordinary
P3H3	COL6A2	ordinary
NSMCE2	RAD21	ordinary
HS2ST1	IMPAD1	ordinary
HSPA8	AP1S3	ordinary
TTYH2	SLC6A4	ordinary
MAPK11	CBX2	ordinary
SLC2A8	ARPC1B	ordinary
VAC14	MTMR12	ordinary
PLK2	NPM1	ordinary
CHRM3	GNAQ	ordinary
LEFTY1	ACVR2A	ordinary
RICTOR	AKT3	ordinary
MLST8	AKT1S1	ordinary
DCP1A	PATL1	ordinary
STXBP1	GAD1	ordinary
BCO1	DHRS4	ordinary
USP33	CCP110	ordinary
NLRX1	RNF135	ordinary
PMM2	GMPPA	ordinary
GMPPB	GMDS	ordinary
MYD88	BAG4	ordinary
DENND4C	CHM	ordinary
MMP15	NID1	ordinary
RAD51C	CDK4	ordinary
CYB5B	KARS	ordinary
COPS6	FBXO32	ordinary
CALM2	IQGAP3	ordinary
NCSTN	DTX2	ordinary
COQ5	COQ7	ordinary
PEX10	PEX5	ordinary
PLPP5	PRKCE	ordinary
RCHY1	RFC5	ordinary
IVD	MCCC1	ordinary
PSMD7	GTSE1	ordinary
GNG4	CACNA2D2	ordinary
ASPH	PPP3CA	ordinary
HDAC7	PML	ordinary
METAP1	MAT2B	ordinary
SGK3	SCNN1B	ordinary
RNF216	TRIM25	ordinary
ADPGK	PGM2L1	ordinary
XYLT2	GPC1	ordinary
EXOSC1	WDR46	ordinary
MPDU1	ALG12	ordinary
COPS8	KLHL5	ordinary
DCTN2	NR3C2	ordinary
PIK3CD	NECAP2	ordinary
HPS1	RAB38	ordinary
CDA	UPP1	ordinary
CDC34	NFKB1	ordinary
IRF3	TBK1	ordinary
LAMTOR3	AIMP1	ordinary
MDC1	TP53BP1	ordinary
PGAM1	ENO1	ordinary
HSPA9	HSPD1	ordinary
MAPRE1	AURKA	ordinary
SLC38A2	SLC38A1	ordinary
INO80B	RBX1	ordinary
STAM	PIP5K1A	ordinary
SLC6A14	TTYH3	ordinary
RAF1	TRAK1	ordinary
PNPLA7	GDPD5	ordinary
PPP5C	PIAS4	ordinary
RAB18	DCTN4	ordinary
GRB2	CSK	ordinary
POFUT1	NOTCH1	ordinary
OAT	ABAT	ordinary
PRKAG2	RHEB	ordinary
GSK3B	CD3EAP	ordinary
SLC25A12	PAICS	ordinary
S100A10	PLAT	ordinary
SLC12A6	ATP1B3	ordinary
ALAS1	HADHA	ordinary
AGO4	NOTCH2	ordinary
SUPT16H	ATM	ordinary
SEH1L	SNRPD1	ordinary
DCP2	LSM7	ordinary
OSTM1	ANO1	ordinary
MKNK1	PPP2R1A	ordinary
USP9X	SNCA	ordinary
TPP2	THOP1	ordinary
GALE	NUDT14	ordinary
HMGB1	DFFB	ordinary
GNAZ	PRKACA	ordinary
GRAP2	RASGRP1	ordinary
FANCM	FANCI	ordinary
SMARCD3	SLC27A1	ordinary
ARL6IP5	TTLL12	ordinary
NFYB	HSPA5	ordinary
DGKA	LPIN1	ordinary
AGTPBP1	SLC7A11	ordinary
PEX12	UBE2D3	ordinary
POLK	RAD50	ordinary
CD4	PIP5K1C	ordinary
N6AMT1	ETF1	ordinary
ACTR1A	FKBP4	ordinary
SAP30	H2AFZ	ordinary
GCAT	GLYATL1	ordinary
PPP1R12A	MYH10	ordinary
PIGW	ACSL4	ordinary
CNOT11	PABPC1	ordinary
TLR1	SNAP23	ordinary
B4GALT7	SDC2	ordinary
PRDX5	TXN2	ordinary
POLR2G	NELFE	ordinary
PTEN	DOCK1	ordinary
MAP3K1	MAP2K4	ordinary
PSMB5	LTBR	ordinary
BHLHE41	PER2	ordinary
MAML3	GZMB	ordinary
MTMR12	PI4K2B	ordinary
NEK7	NDC1	ordinary
STAT4	LCP1	ordinary
CTSA	SLC17A5	ordinary
PLD6	TRIAP1	ordinary
DVL1	EPN1	ordinary
SPRED2	SYNGAP1	ordinary
ARHGAP11B	RHOD	ordinary
CLEC7A	PLCG2	ordinary
ACVR2A	ACVR1B	ordinary
POMT2	DAG1	ordinary
MTX1	TOMM40	ordinary
FADS2	ABCD1	ordinary
EME2	BRIP1	ordinary
NFS1	MOCS3	ordinary
CDS1	CDIPT	ordinary
TRPC4AP	ITGB5	ordinary
MEN1	MYC	ordinary
EDC4	LSM3	ordinary
AASDHPPT	FASN	ordinary
F8	F10	ordinary
SUOX	AQP8	ordinary
XRN2	PNO1	ordinary
GZMB	BID	ordinary
WIPI2	GABARAPL2	ordinary
RDH10	HSD17B1	ordinary
TALDO1	GPI	ordinary
MCEE	MUT	ordinary
TP53BP2	BAX	ordinary
PGP	PLD2	ordinary
MED10	ANGPTL4	ordinary
HENMT1	TDRKH	ordinary
MLX	AGPAT1	ordinary
SRSF10	PRPF40A	ordinary
EDC3	LSM5	ordinary
SLC25A28	FECH	ordinary
GANAB	PDIA3	ordinary
ELOVL5	FADS1	ordinary
PPP3CB	PPP1R1B	ordinary
DRAP1	SMAD4	ordinary
SLC4A8	CA2	ordinary
USP11	NFKBIA	ordinary
TRIM24	CYFIP2	ordinary
EPHB2	EFNB1	ordinary
SMC4	NCAPD3	ordinary
MTMR1	PIP4K2C	ordinary
STEAP2	MCOLN1	ordinary
DYRK1A	LIN54	ordinary
LIN52	TOP2A	ordinary
C2CD5	EXOC6	ordinary
EXOSC9	MPHOSPH10	ordinary
INPP5D	SNX9	ordinary
CYP4F3	CYP4F2	ordinary
ATG16L1	GABARAP	ordinary
MB21D1	TMEM173	ordinary
ADAM9	COL17A1	ordinary
CTNNB1	AXIN2	ordinary
CHPT1	PAFAH1B1	ordinary
TEAD1	CTGF	ordinary
NUP133	IPO8	ordinary
AGBL3	TPGS1	ordinary
IER3	PPP2R5B	ordinary
IL12RB1	STAT4	ordinary
P4HA1	COL5A2	ordinary
SPRED3	RASA3	ordinary
PPARA	CPT1A	ordinary
RMI2	MAD2L2	ordinary
DENND6A	RAB14	ordinary
BARD1	FANCL	ordinary
TRPV4	CPLX1	ordinary
ALS2	RAB5A	ordinary
LATS2	WWTR1	ordinary
TRAF2	IKBKB	ordinary
PORCN	WNT9A	ordinary
IGF1R	IRS1	ordinary
BMP1	LOXL2	ordinary
IL1RAP	BCR	ordinary
CACNA1D	CATSPER2	ordinary
NOD2	MAP2K6	ordinary
LAMA4	HGF	ordinary
HELZ2	FHL2	ordinary
PRODH	PYCR1	ordinary
QTRT1	GDA	ordinary
AGL	SLC2A6	ordinary
FGFR4	FRS3	ordinary
PSMB7	ANAPC2	ordinary
DENND4A	RAB10	ordinary
ABCB8	HMOX2	ordinary
ACSL4	AGPAT3	ordinary
SEMA4D	RRAS	ordinary
MYO5A	EXOC8	ordinary
PSME3	NPEPPS	ordinary
FECH	COX10	ordinary
ABCB10	FLVCR1	ordinary
HSP90AA1	CYGB	ordinary
SNX9	WNT5A	ordinary
EXOSC6	NOP56	ordinary
ARHGAP11A	RHOA	ordinary
AGK	MAPK3	ordinary
CIAO1	RTEL1	ordinary
RGS19	GNA15	ordinary
FZD4	ARPC3	ordinary
PTPN3	STAM	ordinary
ZDHHC8	HDAC6	ordinary
PEX2	UBE2D1	ordinary
NFYA	DDIT3	ordinary
TBC1D10B	RAB35	ordinary
RPA3	HSPB1	ordinary
MTA1	TAF1C	ordinary
FRAT1	PPP2R5E	ordinary
CSNK1A1	APC	ordinary
STK4	LATS1	ordinary
GCH1	MTHFD1	ordinary
INPP5K	EPN2	ordinary
PTPRC	HLA-DRA	ordinary
IL27RA	TYK2	ordinary
MDM2	DYRK2	ordinary
ISCU	AARS2	ordinary
SENP1	SUMO3	ordinary
LMNB1	HIRA	ordinary
TRPM2	ANXA1	ordinary
DENND4B	GDI1	ordinary
INPP5J	PIK3R3	ordinary
PSMD12	HNRNPD	ordinary
MDM4	JMY	ordinary
ADA	GLUL	ordinary
SLC35C1	FUT3	ordinary
MAT1A	FTSJ1	ordinary
DCUN1D2	CUL4A	ordinary
DCTN1	NR3C1	ordinary
CRLS1	TAZ	ordinary
FGFR1	GAB2	ordinary
PPP1CC	CRY2	ordinary
AXL	INPP5K	ordinary
RABGGTB	RAB3D	ordinary
ARF6	FCHO2	ordinary
GPCPD1	ETNK1	ordinary
ZAP70	GRAP2	ordinary
NDC1	XPOT	ordinary
METTL14	POLR2B	ordinary
RHEB	EIF4EBP1	ordinary
MMS19	ERCC2	ordinary
NARFL	NUBP2	ordinary
CPLX1	DNAJC5	ordinary
GGT7	DPEP1	ordinary
KRAS	BRAP	ordinary
TNRC6C	NOTCH4	ordinary
PPM1L	COL4A3BP	ordinary
CYB5R1	CP	ordinary
PDGFRA	WASF3	ordinary
FGF2	FRS2	ordinary
MNAT1	POLR2K	ordinary
ESCO2	WAPL	ordinary
SLC35A3	MFNG	ordinary
WNT5A	FZD2	ordinary
E2F4	MYBL2	ordinary
SUCLG1	ACSF3	ordinary
UBA3	SKP1	ordinary
EGFR	PXN	ordinary
MRM1	SLC25A26	ordinary
PIGN	CEPT1	ordinary
GPI	SLC37A1	ordinary
POLE3	RMI1	ordinary
VRK2	TMPO	ordinary
BTC	ERBB3	ordinary
PEMT	STARD10	ordinary
RBBP7	CDKN2A	ordinary
CHRNA5	VDAC3	ordinary
NPC1L1	SULT2B1	ordinary
PPP1R13B	FAS	ordinary
XYLT1	HSPG2	ordinary
AADAT	EARS2	ordinary
KCNE4	FXYD6	ordinary
SYT11	PLEKHA2	ordinary
POLD1	RPA3	ordinary
ALG10B	MAGT1	ordinary
MAGT1	MMGT1	ordinary
CLCN5	CLCN2	ordinary
HIBCH	BCKDHB	ordinary
CHST15	CSPG4	ordinary
PARG	FEN1	ordinary
CATSPERG	NEB	ordinary
MAPKAPK3	CBX6	ordinary
DPAGT1	ALG14	ordinary
ALG13	ALG1	ordinary
WWTR1	SMAD7	ordinary
LRP10	AGRN	ordinary
VPS72	HIST3H2A	ordinary
FCHO1	AP2M1	ordinary
CTSV	HLA-B	ordinary
PFAS	GART	ordinary
CHMP3	MAP1LC3A	ordinary
FKBP1B	SLC24A3	ordinary
ABCD4	ABCC1	ordinary
OGDH	GCDH	ordinary
HPS4	RAB32	ordinary
GIT1	MYL12A	ordinary
RAB14	EXOC5	ordinary
PGK1	GAPDH	ordinary
SMC2	NCAPG2	ordinary
NUP160	CPSF2	ordinary
CDC42	BUB1	ordinary
LIPT2	GCSH	ordinary
GBF1	COPG1	ordinary
PIKFYVE	MTMR2	ordinary
KDM5B	CDKN1A	ordinary
CDKN1A	MCM3	ordinary
SLC25A4	ATP6V1E1	ordinary
PSMA1	LTB	ordinary
LYPLA1	NOS3	ordinary
NUP62	SYMPK	ordinary
ITPA	NT5C2	ordinary
STAM2	EPS15	ordinary
GOT1	SLC25A13	ordinary
PLCG1	DGKD	ordinary
MED9	PCK1	ordinary
PRMT5	GEMIN2	ordinary
CDK6	TFDP2	ordinary
ANAPC5	CXCL8	ordinary
RRAGC	SLC7A7	ordinary
FAM120B	LPL	ordinary
LIG3	ZNF830	ordinary
RGS5	GNAI3	ordinary
CYLD	SHARPIN	ordinary
NLK	TCF7L2	ordinary
GNG11	CACNB3	ordinary
SMPD2	SGMS2	ordinary
CRAT	NUDT7	ordinary
AAAS	SNRPD2	ordinary
RNF5	UBB	ordinary
H2AFZ	NCAPH2	ordinary
AK3	NME4	ordinary
GTF2H3	POLR2J	ordinary
PRKACA	IL3RA	ordinary
LPCAT1	PLD6	ordinary
PMPCA	TIMM50	ordinary
RGS10	GNAI1	ordinary
BPNT1	NSF	ordinary
DOLK	DPAGT1	ordinary
HSD17B12	SRD5A1	ordinary
RNF2	BMI1	ordinary
PRPS2	HPRT1	ordinary
C4A	C4B	ordinary
MTMR9	PIP4K2B	ordinary
PSME4	ANAPC1	ordinary
MAPKAPK5	KALRN	ordinary
METAP2	DARS	ordinary
ENO1	PKM	ordinary
LPCAT4	PTDSS1	ordinary
SCN1B	DLG4	ordinary
PRDX1	TXN	ordinary
PIGU	PLAUR	ordinary
CERS5	DEGS2	ordinary
MCU	SLC8B1	ordinary
NRF1	TFB2M	ordinary
DNM2	AP2A1	ordinary
H2AFX	KDM4B	ordinary
ALG10	STT3A	ordinary
PIGM	PIGN	ordinary
CLCN4	SLC12A6	ordinary
SLC35B2	CHST1	ordinary
NUP210	SNRPE	ordinary
AKAP13	RHOU	ordinary
TRPC6	RASGRF2	ordinary
NCOR1	NR1D1	ordinary
MAN2A1	MGAT2	ordinary
DPEP2	CAMK2G	ordinary
AMDHD2	GNPDA1	ordinary
GABARAPL1	ATG3	ordinary
MMP10	MMP9	ordinary
ASRGL1	FARSA	ordinary
TRPM4	SLC9A8	ordinary
XRCC5	PRKDC	ordinary
MTX2	VDAC1	ordinary
VRK1	LEMD2	ordinary
ZFYVE9	SMAD3	ordinary
ACACA	ELOVL6	ordinary
SH3KBP1	PIK3AP1	ordinary
HDAC4	RUNX3	ordinary
FDPS	FDFT1	ordinary
PNPO	DPH6	ordinary
PTPN12	PDGFB	ordinary
NME4	NADK2	ordinary
ESD	MGST3	ordinary
YME1L1	SMDT1	ordinary
MMAB	MMAA	ordinary
TTL	TUBA1A	ordinary
ALDH6A1	PCCB	ordinary
EPHA1	EFNA4	ordinary
PSMB2	TNFRSF11A	ordinary
BRIP1	REV1	ordinary
DHX9	RELA	ordinary
KIF11	HLA-DPA1	ordinary
TAGAP	RAC2	ordinary
SLC4A2	SLC12A7	ordinary
CPSF6	TEC	ordinary
ITCH	NOD2	ordinary
FBXL5	IREB2	ordinary
PKM	ATP6V1D	ordinary
MAPK7	MEF2C	ordinary
PRKG1	KCNMA1	ordinary
INPP5E	PLEKHA8	ordinary
GBA2	HK1	ordinary
NAGLU	GUSB	ordinary
DHPS	EIF5A	ordinary
PRKCE	SHC1	ordinary
RAD51D	BRCA1	ordinary
SMC6	STAG1	ordinary
PAN3	EIF4A1	ordinary
COMT	MTR	ordinary
TOMM20	ATP5A1	ordinary
DOHH	EIF5A2	ordinary
CDK7	TAL1	ordinary
TULP3	PDE7A	ordinary
CLIC2	ANXA2	ordinary
VAMP8	PUM1	ordinary
SLC19A1	MTRR	ordinary
CTPS2	TTLL4	ordinary
EPHB3	EFNB3	ordinary
ITSN1	ARPC4	ordinary
CD3E	PRKCQ	ordinary
SLC25A22	GLUD1	ordinary
SSB	POLR1D	ordinary
FZD7	PARD6A	ordinary
PARD6A	PRICKLE1	ordinary
PDPN	DGKA	ordinary
NUPL2	SLBP	ordinary
B3GNT5	MUC1	ordinary
ADRA2A	GNG7	ordinary
SCARB2	INPP4B	ordinary
HLCS	ACACA	ordinary
CDKN2A	CDK6	ordinary
PSMC3IP	RPA1	ordinary
C4B	C4A	ordinary
PHF20	MDM4	ordinary
ADAMTS14	COL5A3	ordinary
FZD1	CSNK1A1	ordinary
RFC5	NBN	ordinary
SEL1L	RPS27A	ordinary
RUVBL2	DKC1	ordinary
NEK6	NUP62	ordinary
SEPT7	CDC42EP3	ordinary
SLC26A1	PAPSS2	ordinary
SLC39A6	KCNJ11	ordinary
MCOLN2	TNNI1	ordinary
FAS	RIPK1	ordinary
ISYNA1	IMPA2	ordinary
MAP2K6	BOC	ordinary
EHMT2	TBP	ordinary
MMP14	LAMB1	ordinary
MSRA	AIMP2	ordinary
MKS1	GLI1	ordinary
FOXO1	RAG1	ordinary
GLI3	PTCH1	ordinary
METTL3	POLR2H	ordinary
RAB1B	GORASP1	ordinary
HEPH	LCN2	ordinary
PLXNA3	CRMP1	ordinary
MBTPS2	CREB3L2	ordinary
CACNB2	ORAI1	ordinary
PLPP4	TRPC6	ordinary
PPP1CB	CSNK1D	ordinary
PMM1	GMPPB	ordinary
SMC5	SMC1A	ordinary
SMPD4	VAPB	ordinary
ACOT9	ACAT1	ordinary
CENPE	HLA-DPB1	ordinary
CCT8	BBS5	ordinary
P4HA3	COL6A3	ordinary
ESPL1	CDCA5	ordinary
PPP2CB	SPRY2	ordinary
CAMKMT	CALM2	ordinary
SLC13A3	GRIN2D	ordinary
SYNJ1	SYNJ2	ordinary
PSMC2	CDC23	ordinary
MYLIP	VLDLR	ordinary
SARDH	GARS	ordinary
CDKN2D	CCND3	ordinary
USP18	MX1	ordinary
MC1R	GNAS	ordinary
MTHFD1	MTHFR	ordinary
IL4R	STAT6	ordinary
APC	AXIN1	ordinary
ATAT1	SLC33A1	ordinary
ARHGEF6	RAC1	ordinary
PTDSS1	PLA2G16	ordinary
B3GALT6	SDC1	ordinary
PCOLCE	COL1A2	ordinary
PTP4A2	RABGGTB	ordinary
ELOVL6	HSD17B12	ordinary
PRMT1	PRMT6	ordinary
DIO3	SULT1B1	ordinary
ERCC2	POLR2E	ordinary
ATG4D	MAP1LC3B	ordinary
LRIG1	EGFR	ordinary
LEPR	PTPN11	ordinary
SSRP1	MDC1	ordinary
PITPNM3	PI4K2A	ordinary
NUP58	KPNA3	ordinary
OTUD7B	RBCK1	ordinary
BTK	WAS	ordinary
SOCS2	IL2RG	ordinary
GNAL	PDE3B	ordinary
PLK3	CDC25C	ordinary
NMT2	AACS	ordinary
ABCA5	ABCA2	ordinary
SLC1A5	CTPS1	ordinary
ALG8	ALG10	ordinary
MARC2	NOS2	ordinary
CHAC1	CNDP2	ordinary
PAH	YARS	ordinary
CSNK1G2	GSK3B	ordinary
CHRNA3	ATP2C2	ordinary
POLE2	RAD51B	ordinary
PPP6R1	SEC24C	ordinary
NUDT14	PGM2	ordinary
OSBPL10	PLA1A	ordinary
SLC44A2	CHKB	ordinary
DDIT4	YWHAG	ordinary
B2M	FGFR3	ordinary
SLC2A1	GSTO2	ordinary
ADCY3	RAPGEF4	ordinary
PDSS2	COQ2	ordinary
TP73	BBC3	ordinary
SLC20A2	SLC9A9	ordinary
SPHK1	PLPP1	ordinary
ATP6V1D	PNP	ordinary
LY86	CD14	ordinary
CCNB2	CENPN	ordinary
ABL1	RAD52	ordinary
SLC11A2	FTL	ordinary
IRAK2	IKBKG	ordinary
ST3GAL3	MUC4	ordinary
RAB8A	EXOC2	ordinary
HDAC8	NAA38	ordinary
MCM8	POLA1	ordinary
EBF1	PPARG	ordinary
ATP6V1F	NME2	ordinary
ARFGAP1	SEC22B	ordinary
HMGCL	NAGS	ordinary
PPIA	NFATC2	ordinary
SKP2	CUL1	ordinary
DUSP7	MAPK7	ordinary
MAPK12	MEF2D	ordinary
RIN1	RAB5C	ordinary
CNGA1	TMOD1	ordinary
NUP35	SNRPG	ordinary
APBA1	UNC13B	ordinary
CAMK2D	MYO6	ordinary
PCNA	RMI2	ordinary
MAPK3	RPS6KA5	ordinary
SLC25A37	LYRM4	ordinary
P3H2	COL14A1	ordinary
SEC23A	CNIH3	ordinary
EXOSC4	TBL3	ordinary
SMAD7	KEAP1	ordinary
RFC2	XRCC3	ordinary
C2	C5	ordinary
PGD	RPIA	ordinary
RHOC	PPP1R12B	ordinary
MBOAT1	PLA2G4C	ordinary
GABPA	MTERF1	ordinary
ACSL6	RXRA	ordinary
TLN1	PTK2	ordinary
UBE2L6	ISG15	ordinary
CDK5	YWHAE	ordinary
UAP1	SLC35A3	ordinary
GLRX3	ALAD	ordinary
HNF1A	HNF4G	ordinary
GPSM2	S1PR1	ordinary
FASN	ACSL5	ordinary
CHMP6	PPIA	ordinary
EFNA3	VAV2	ordinary
ACLY	NAA35	ordinary
MAPK8	BMF	ordinary
ITPKB	OCRL	ordinary
PSMA7	TPP2	ordinary
LIG1	PRPF19	ordinary
ATP6V0D1	PYGB	ordinary
SERPINH1	HSF1	ordinary
PRKCD	CARD9	ordinary
ATR	DBF4	ordinary
USP30	PTRH2	ordinary
ABCA2	LCAT	ordinary
PDK2	DLD	ordinary
MID1IP1	ELOVL1	ordinary
ACSS2	ACAT2	ordinary
CIT	MYL9	ordinary
PTGES2	CBR1	ordinary
BLM	AQR	ordinary
PDE4D	AMPD3	ordinary
FXYD3	SCN1B	ordinary
ARHGEF9	AGT	ordinary
DNMT1	H2AFJ	ordinary
ADCY6	HCN3	ordinary
CACFD1	ITGA1	ordinary
TNFRSF10D	TNFRSF10A	ordinary
TNFRSF10C	TNFRSF10B	ordinary
SLC12A2	ABCC9	ordinary
C1R	C1S	ordinary
NUP188	ALYREF	ordinary
ACOT4	SLC27A2	ordinary
SLC35B3	HS2ST1	ordinary
LIN37	CDC6	ordinary
FES	PLXNA3	ordinary
LIN9	CDC25A	ordinary
ADK	CMPK1	ordinary
ATP1B3	SCN4B	ordinary
PAXIP1	DCLRE1C	ordinary
DDAH1	NMRAL1	ordinary
GAPDH	TPI1	ordinary
MAPK6	NCOA3	ordinary
MED25	CEBPA	ordinary
HCFC1	TFB1M	ordinary
STON1	ARPC1A	ordinary
TCF3	MYB	ordinary
ESCO1	PDS5A	ordinary
LIMK1	CFL1	ordinary
PRPS1	NAPRT	ordinary
MPI	PMM1	ordinary
MYO7A	RDH5	ordinary
RBL1	CDK1	ordinary
STK3	MOB1B	ordinary
CHEK2	RNF8	ordinary
KDM4A	HERC2	ordinary
XYLB	PPP2CB	ordinary
PC	MDH2	ordinary
FAM96B	POLD1	ordinary
C1S	C1R	ordinary
HSPH1	HSPA1B	ordinary
RASGRP2	RAP1B	ordinary
ASNS	NARS	ordinary
DNMT3B	HIST1H2AC	ordinary
GNAQ	DGKH	ordinary
ACAA1	CRAT	ordinary
GDE1	GPAT4	ordinary
GLA	GLB1L	ordinary
LMBRD1	MMACHC	ordinary
TEK	KRAS	ordinary
CDC14B	MAPK6	ordinary
ITPR1	TTN	ordinary
DZIP1	SPOPL	ordinary
C1QA	C2	ordinary
APPL1	CASP3	ordinary
CUL4A	XPC	ordinary
LEF1	CCND1	ordinary
TNFSF12	BIRC2	ordinary
LIN54	RBL1	ordinary
PIK3CG	SGIP1	ordinary
GCNT3	MUC17	ordinary
SLC7A6	SLC3A1	ordinary
RAPGEF2	HRAS	ordinary
ARNTL	CRY1	ordinary
HDAC2	BRD7	ordinary
COPS7B	CCNF	ordinary
CAST	CDK5R1	ordinary
SPINT1	MST1	ordinary
NRIP1	ARNTL	ordinary
DENND2A	RAB9A	ordinary
A2M	RHOB	ordinary
CEL	NPC1L1	ordinary
RNF8	CHEK2	ordinary
NDST1	SDC3	ordinary
CACNA2D1	SORBS3	ordinary
DNA2	CDK7	ordinary
[truncated: 468 more rows]

## Sheet: ESCA
gene1	gene2	type
HIF3A	VEGFA	critical
ASS1	ASL	critical
NHLRC1	EPM2A	critical
FIG4	MTMR7	critical
ABCD1	BECN1	critical
GK	GPAT2	critical
FOXA2	PDX1	critical
HIPK2	EP300	critical
TSTA3	SLC35C1	critical
EIF2AK3	EIF2S1	critical
ITGA4	ITGAL	critical
TTL	TUBA1B	critical
AGPAT3	PAFAH1B3	critical
GART	PFAS	critical
RPS6KA5	ATF1	critical
ITGAL	ITGA4	critical
SMAD2	SMAD7	critical
FOXM1	CENPF	critical
ABHD14B	SULT1A1	critical
PELI2	TRAF6	critical
ENOPH1	ADI1	critical
CAMK4	CREB1	critical
SH2B1	GHR	critical
COL18A1	MMP13	critical
MED30	CD36	critical
LEO1	UBE2A	critical
HMGB1	HIST1H1E	critical
PTP4A2	RABGGTA	critical
CFD	CFB	critical
ATP6V0E2	NME2	critical
ASB1	UBE2F	critical
ACO1	IDH1	critical
UGP2	PPP1R3C	critical
MED1	TRIB3	critical
TKT	GPI	critical
NLK	TCF7L2	critical
TCF3	MYB	critical
NUDT4	IPPK	critical
MLX	AGPAT1	critical
APIP	ENOPH1	critical
AMPD2	RHCG	critical
ALAD	HMBS	critical
SLC36A4	TDO2	critical
MTMR14	PIP4K2A	critical
SEPHS2	SEPSECS	critical
KYNU	SLC1A5	critical
UBE2D3	TLR3	critical
SBF1	PI4KA	critical
IL2RG	JAK3	critical
TOR1A	STON1	critical
TOR1B	STON2	critical
ST3GAL2	OMD	critical
MASP1	C2	critical
GMDS	TSTA3	critical
HMGCR	MVK	critical
ORMDL3	ACLY	critical
KAT2A	TBP	critical
ACADM	DECR1	critical
PRLR	PTPN11	critical
USP47	POLB	critical
VAPA	AGO4	critical
SLC19A2	TPK1	critical
CHEK1	WEE1	critical
PTPN3	EPN1	critical
PTPN1	STAT2	critical
BAG2	HSPA13	critical
EIF1AX	RPL39L	critical
SLC52A2	RFK	critical
CTPS2	PCYT1A	critical
ZNF385A	SFN	critical
USP2	TAB3	critical
HMGCS2	HMGCL	critical
USP4	FADD	critical
SRM	SMS	critical
GALE	ALG5	critical
PSEN2	DTX4	critical
PIGN	CEPT1	critical
PIGX	PIGN	critical
PPP1CC	CRY1	critical
SERPINB8	SERPINB2	critical
PECR	PHYH	critical
PFKP	ALDOA	critical
DDIT4	YWHAZ	critical
MBTPS2	CREB3L4	critical
PELP1	PTK6	critical
KRAS	TLN1	critical
SOCS2	IL7R	critical
CCNH	CCNE1	critical
FEN1	POLD4	critical
CHD4	ING5	critical
NEURL1B	JAG2	critical
RAB3GAP2	BICD1	critical
PIKFYVE	MTMR12	critical
RHOB	MYL6	critical
RHOA	PKN3	critical
POLR2H	SOX2	critical
MPI	PMM1	critical
PRODH	PYCR2	critical
DHCR24	SREBF2	critical
APAF1	CASP7	critical
KMT2D	GP1BA	critical
PLCD1	INPP5B	critical
DAPP1	ITPKC	critical
PIAS2	SUZ12	critical
LGR5	ZNRF3	critical
ESCO2	PDS5B	critical
TRAF2	MAP3K14	critical
GTF2H2	POLR2H	critical
GTF2H4	POLR2K	critical
ADPRM	PRPS1	critical
TAB2	MAP3K7	critical
GNA15	OCRL	critical
PPCS	PPCDC	critical
MOCS2	GPHN	critical
MOCS1	MOCS2	critical
JAK3	IL2RG	critical
CHKA	PCYT2	critical
RAB3GAP1	DYNC1LI2	critical
CDC25A	CCNE2	critical
NR1H3	VLDLR	critical
INPP5E	PLEKHA3	critical
CHUK	SNAP23	critical
PPARA	GLIPR1	critical
LRP8	SDC4	critical
CSNK1A1	APC	critical
DNAJC7	HSPA14	critical
NOX4	SOD1	critical
DYNC1LI2	PGR	critical
CDIPT	PIGP	critical
NCOA6	NPAS2	critical
ACAT2	HMGCS1	critical
CISH	IL7	critical
MCAT	GCAT	critical
SLC27A2	AMACR	critical
IL2RA	IL2RB	critical
AK2	ARL2	critical
CHMP4B	MAP1LC3A	critical
CTSK	COL18A1	critical
LPIN2	PNPLA2	critical
LPIN3	DGAT1	critical
ST5	RAB13	critical
SEC11C	SSR4	critical
PPP3CC	YWHAG	critical
LIN7B	PPFIA3	critical
IDI1	FDPS	critical
IKBKG	NFKBIE	critical
SLIT2	ROBO1	critical
TSC22D3	SCNN1D	critical
PHGDH	PSAT1	critical
KITLG	KIT	critical
OSBPL10	PLA2G10	critical
ECHS1	HADH	critical
MAN1C1	MGAT1	critical
EPAS1	HIGD1A	critical
AKR1A1	CRYL1	critical
FPGS	MTHFD1	critical
EHMT2	TAF1D	critical
SMPD4	VAPB	critical
REPS2	LDLRAP1	critical
OSTM1	CLCN2	critical
PTK2	WIPF3	critical
PRKAA1	DYNLL1	critical
ALOX12	GPX1	critical
NARFL	NUBP2	critical
MAML2	HES1	critical
HIST1H3H	RAG1	critical
NRIP1	ARNTL	critical
PEX12	UBE2D1	critical
LTBR	TRAF3	critical
CYP4F11	CYP4F3	critical
PLA2G6	CYP2D6	critical
CTSO	CD74	critical
CTSA	SLC17A5	critical
CTSV	LNPEP	critical
FGFR1	INPPL1	critical
INPP5A	INPP1	critical
INPP5D	PACSIN2	critical
PYCR1	PARS2	critical
CYP4F3	CYP4F11	critical
MET	CBL	critical
SIRT3	IDH2	critical
ATG13	AMBRA1	critical
AMDHD2	GNPDA1	critical
UBE2C	IL6	critical
ATG12	MAP1LC3B	critical
ASNA1	SEC63	critical
IL1B	MAP3K3	critical
CTDNEP1	LPIN1	critical
TALDO1	TKT	critical
CAST	CDK5R1	critical
ALOX12B	ALOXE3	critical
VPS4A	CHMP6	critical
TBL1XR1	TXNRD1	critical
LTA4H	CYP4F22	critical
PMPCB	LDHD	critical
TFAP2C	PITX2	critical
SUOX	PRDX3	critical
RPA1	COL4A6	critical
CDKN2C	CCND1	critical
AHCY	CTH	critical
ESCO1	WAPL	critical
PARG	FEN1	critical
TIMP2	MMP2	critical
CHMP2A	GABARAP	critical
PAFAH1B1	BICD2	critical
CPT2	ACADVL	critical
INPP4B	SYNJ2	critical
PYGL	GYG2	critical
MAGOH	UPF1	critical
ETHE1	TST	critical
H2AFX	EYA2	critical
ACADS	ECHS1	critical
TDO2	AFMID	critical
CLTA	AP1S1	critical
MYD88	IRAK2	critical
GTF2H1	NCBP2	critical
EPM2A	GYG1	critical
PGM3	UAP1	critical
SLC26A1	PAPSS2	critical
ELOVL5	FADS1	critical
GGT5	DPEP2	critical
ERAP1	TAPBP	critical
GABPB1	TFAM	critical
SAA1	RELA	critical
IDUA	SGSH	critical
TBC1D16	RAB4A	critical
PMVK	MVD	critical
CARNS1	CARNMT1	critical
NRAS	MPRIP	critical
PDZD11	ATOX1	critical
DGKD	LPIN3	critical
GDE1	CDIPT	critical
SEC23A	COL7A1	critical
NEDD4L	UBC	critical
PRKAG1	ATG101	critical
HMBS	UROS	critical
GPAT3	CDS1	critical
HSPA8	HIP1R	critical
CNDP2	GCLM	critical
CDA	UPP1	critical
HSCB	GLRX5	critical
CHCHD4	COA4	critical
SLC39A3	C1QBP	critical
SLC39A4	S100A7A	critical
RHEB	EIF4EBP1	critical
MTHFD1L	MTFMT	critical
SOAT1	ACSL4	critical
MBOAT7	PITPNM2	critical
SMC6	STAG1	critical
LEF1	TCF4	critical
ALG14	ALG1	critical
LMBRD1	ABCC1	critical
MAP2K2	FAM114A2	critical
MAP2K1	AGTRAP	critical
CAT	NUDT12	critical
NLRC5	IFIH1	critical
E2F3	EED	critical
E2F2	EZH2	critical
CEPT1	PLA2G6	critical
GHR	IRS2	critical
USP21	IL33	critical
ALS2CL	RAB5A	critical
ADAMTS3	COL11A1	critical
GGT1	DLG3	critical
CYLD	NOD2	critical
TRAPPC12	GDI2	critical
SLC35D1	POMGNT2	critical
SHH	PTCH2	critical
ATP6V1D	PNP	critical
ADSL	ATIC	critical
GNB4	DGKG	critical
GDPD5	GPAM	critical
ST8SIA4	NCAM1	critical
DPAGT1	ALG14	critical
ECE2	EDN1	critical
AURKA	PHLDA1	critical
NOD2	MAP2K4	critical
DNAJC19	HSCB	critical
ROCK1	PPP1R12A	critical
ROCK2	PPP1R12B	critical
ABCC1	GGT1	critical
PGAM1	ENO1	critical
WNK4	SCNN1A	critical
AQP9	BST1	critical
ACOT7	HDAC8	critical
USP33	CCP110	critical
SHMT1	ALDH9A1	critical
PLD2	PLPP5	critical
RBBP4	MEAF6	critical
MSMO1	NSDHL	critical
PLD6	PRELID3A	critical
MCRS1	GPS1	critical
DCXR	SORD	critical
ACACA	FASN	critical
APPL1	CASP3	critical
GATAD2A	BRPF1	critical
PSAP	ASAH1	critical
YES1	NRG4	critical
MED19	FABP4	critical
MAN2B2	MANBA	critical
MAN2B1	MAN2B2	critical
PLK2	CENPJ	critical
ANAPC16	FZR1	critical
CSNK1G2	DVL3	critical
SERPINB6	PLAU	critical
SMO	GLI2	critical
NFS1	MOCS3	critical
UBB	POLD3	critical
PDCD6IP	ANTXR2	critical
KBTBD7	SPRED2	critical
GNPNAT1	PGM3	critical
TLL1	COL27A1	critical
POMGNT2	DAG1	critical
TBC1D2	RAB7A	critical
CHST1	LUM	critical
DEGS1	FA2H	critical
ARHGEF28	LIMK2	critical
C9orf3	SLC7A7	critical
RRM2	GLRX	critical
GCLM	GGCT	critical
PAK1	MYLK	critical
RRAGC	ULK1	critical
SLC40A1	LCN2	critical
TRAP1	SDHB	critical
DMPK	PLN	critical
IRAK2	MAP2K3	critical
IRAK4	PELI2	critical
PIK3R2	SNX9	critical
GRB10	INSR	critical
TNFSF12	BIRC3	critical
ATP6V1F	SLC25A6	critical
PGM2	SLC37A2	critical
CBL	TGFBR2	critical
SMS	SAT1	critical
SLC4A3	SLC12A4	critical
RXRA	SLC25A20	critical
MVD	IDI1	critical
GLO1	HAGH	critical
L2HGDH	DLST	critical
F8	F10	critical
ATP6V1E1	ARL2BP	critical
ABCA2	SULT2B1	critical
RFT1	ALG3	critical
PPFIA3	ARL6IP5	critical
PPFIA1	SLC1A1	critical
ECI1	MECR	critical
CNOT7	PAIP1	critical
SLC37A4	G6PC3	critical
CLCN6	ARHGEF9	critical
PLA2G4F	PLA2G4E	critical
CLU	C7	critical
GNPDA2	PFKP	critical
SLC25A10	MDH1	critical
PLD1	PITPNM3	critical
CYB5R3	CYB5A	critical
ALG3	MPDU1	critical
ALG1	ALG2	critical
ALG6	ALG8	critical
CCNE1	RB1	critical
ITPKA	ITPK1	critical
HGS	STAM2	critical
MAOB	PRDX5	critical
RNF111	XPA	critical
HDAC1	PML	critical
HDAC2	BRD7	critical
CLOCK	PER2	critical
C1QBP	F12	critical
RAB18	ACTR10	critical
ASL	NOS2	critical
ATP6V0C	GUK1	critical
RAB1A	GORASP1	critical
HIF1A	RORA	critical
SLC31A1	ATP7B	critical
NEU1	GLB1L	critical
ERCC3	POLR2D	critical
GABARAPL1	ATG3	critical
PHYH	HACL1	critical
NOTCH1	HEY1	critical
ADH1C	DHRS3	critical
CERS4	DEGS1	critical
INHBA	ACVR1B	critical
GPI	G6PD	critical
SLC25A20	RXRA	critical
PLA2G4A	CYP1B1	critical
ATIC	IMPDH2	critical
MTF1	CSRP1	critical
UBE2N	NOD1	critical
METTL3	GTF2F2	critical
CIAO1	ERCC2	critical
SUMF2	ARSD	critical
MAML3	GZMB	critical
PGK1	GAPDH	critical
GFRA3	RET	critical
BCAT1	GPT	critical
LGMN	TLR7	critical
GLB1L	GBA	critical
GPD1L	GPAT4	critical
DOHH	EIF5A	critical
SERPINE2	F13A1	critical
MTMR7	FIG4	critical
LRP5	FZD6	critical
ESR1	CXCL12	critical
MAP4K4	MAP3K5	critical
LIMK1	CFL1	critical
NRG1	ERBB3	critical
PKN1	PPP1R14A	critical
SUCLG1	SDHD	critical
INO80B	RBX1	critical
PRPS1	NAPRT	critical
PSAT1	PSPH	critical
GSS	GLO1	critical
ISCU	AARS2	critical
IL36RN	IL36G	critical
HK1	SLC37A1	critical
ENPP1	ACP5	critical
BCHE	SLC44A2	critical
HELZ2	FHL2	critical
MTA1	TAF1C	critical
PDGFB	PDGFRB	critical
DCP1B	LSM6	critical
TGFA	SEC24B	critical
HPGD	PTGR1	critical
PLAT	PDGFD	critical
CRLS1	TAZ	critical
CCNG1	MDM2	critical
USP19	RNF123	critical
NPM1	NOP2	critical
NFIB	POLR3F	critical
FES	PLXNA4	critical
GCAT	SHMT2	critical
MLST8	MAF1	critical
HMGCS1	HMGCR	critical
PRPS2	HPRT1	critical
GLI2	GLI1	critical
MTA3	TAF1B	critical
EP400	CABIN1	critical
BDH2	AACS	critical
PCF11	INTS3	ordinary
INTS7	POLR2A	ordinary
CLCN4	GABRB3	ordinary
GABRB3	SLC4A2	ordinary
CALM3	IQGAP3	ordinary
DPH7	EEF2	ordinary
LAMC2	MET	ordinary
PAFAH1B3	CAPZA1	ordinary
TAF1B	H2AFX	ordinary
HIST1H4I	CHEK2	ordinary
WRN	REV3L	ordinary
POLI	ISG15	ordinary
RAB33B	MAN1A2	ordinary
PSMB8	BUB3	ordinary
GSK3B	PLXNA1	ordinary
HLA-E	FCGR3A	ordinary
LAT2	VAV1	ordinary
FNBP1L	SCARB2	ordinary
EPS15L1	SH3KBP1	ordinary
RBBP8	FANCC	ordinary
PRMT6	HIST1H4I	ordinary
HIST1H3G	HIST4H4	ordinary
IL1A	IRAK1	ordinary
IRAK1	AKT1	ordinary
EPC1	HIST1H2AE	ordinary
HIST1H2AE	NCAPD3	ordinary
KCNJ14	FXYD6	ordinary
ATP1B1	SLC9A1	ordinary
PSMD12	HNRNPD	ordinary
ANAPC10	CXCL8	ordinary
PSMD4	OAZ3	ordinary
TNFRSF12A	TRAF2	ordinary
XRN2	PNO1	ordinary
H2AFZ	NCAPH2	ordinary
XYLT1	HSPG2	ordinary
PSMB3	LIMD1	ordinary
EGLN3	HIF1A	ordinary
SGIP1	SYT11	ordinary
VAMP4	PIP5K1A	ordinary
DHX9	NFKB2	ordinary
NFKB2	IL1B	ordinary
ACOT8	ACAA1	ordinary
SCP2	CRAT	ordinary
GALNT18	MUC1	ordinary
FBXW11	NFKBIA	ordinary
APP	ACTA2	ordinary
SLC39A7	MT1G	ordinary
SLC39A2	PGLYRP3	ordinary
ORMDL2	MORC2	ordinary
MORC2	NAA30	ordinary
UBE2V1	RIPK2	ordinary
RIPK2	BCL10	ordinary
NUP107	KPNA4	ordinary
PITPNM2	PI4K2A	ordinary
SUDS3	HIST1H2BG	ordinary
IDH3G	GPT2	ordinary
AASS	AADAT	ordinary
KCNC3	ATP1B2	ordinary
NUP98	GEMIN5	ordinary
FCGR2A	CD86	ordinary
PLCG1	TRPC1	ordinary
ABAT	OAT	ordinary
NAGS	ACAT1	ordinary
PKM	LDHA	ordinary
ADCY3	RAPGEF3	ordinary
PAPSS1	SLC35B3	ordinary
SLC35B3	TPST2	ordinary
ACTR8	DDB1	ordinary
COPS3	LRR1	ordinary
GNAI3	PRKACB	ordinary
RAPGEF3	RAP1A	ordinary
EPS15	DAB2	ordinary
VAMP3	ARPC1B	ordinary
BOC	SMO	ordinary
FNBP1	VAMP2	ordinary
EGFR	BCR	ordinary
SRGAP2	RHOU	ordinary
RHOC	MYH10	ordinary
NUP93	SLBP	ordinary
AGL	SLC2A6	ordinary
SNX18	SYT8	ordinary
EFNB1	GIT1	ordinary
GIT1	PAK2	ordinary
CLCN7	SLC26A9	ordinary
ANO7	SLC6A6	ordinary
TFG	SEC22A	ordinary
GNB2	CUX1	ordinary
FCGR3A	LCP2	ordinary
TOMM7	ATP5A1	ordinary
TOMM40	PINK1	ordinary
SCARB2	INPP4B	ordinary
NUP160	CPSF2	ordinary
ARHGEF6	RHOH	ordinary
H3F3B	NCAPG2	ordinary
MTR	IARS	ordinary
TRIM25	CASP10	ordinary
CASP8	BID	ordinary
PSMA4	OAZ2	ordinary
PPP2R5E	MARK3	ordinary
B4GALT2	PRELP	ordinary
VAMP8	ARPC4	ordinary
SKP1	PRLR	ordinary
GPS1	COMMD4	ordinary
CCNT1	FANCI	ordinary
PSMD14	WTIP	ordinary
TPCN1	CACNA1D	ordinary
ARFGAP1	SEC22B	ordinary
DTYMK	IFT122	ordinary
ATP6V0E1	SLC25A4	ordinary
PIP4K2A	GNG2	ordinary
PLCH2	DGKA	ordinary
PDE4A	AK2	ordinary
RPS27L	DCAF13	ordinary
DNAJC2	HSPA5	ordinary
PRKAG2	RHEB	ordinary
DDX6	LSM7	ordinary
COPS6	DTL	ordinary
PTEN	DOCK1	ordinary
GNG12	ITPR1	ordinary
PTPN12	BTC	ordinary
ERBB2	PDPK1	ordinary
ITSN1	ARPC5	ordinary
ACTR2	VAMP7	ordinary
GABRA3	SLC26A6	ordinary
SLC6A9	ANO5	ordinary
CACNB2	CATSPER2	ordinary
MTMR3	PITPNB	ordinary
PLA2G16	PNPLA7	ordinary
SBF2	PLA2G12A	ordinary
CHML	RAB40C	ordinary
ACVR2B	BMPR1A	ordinary
CACNA1C	SPARC	ordinary
CACNA1A	STXBP1	ordinary
CHMP4A	PPIA	ordinary
PPIA	NFATC2	ordinary
GNAI1	P2RX4	ordinary
FH	SLC25A10	ordinary
TRPM7	SLC24A1	ordinary
OSBP	PPM1L	ordinary
PPM1L	COL4A3BP	ordinary
PSMD3	CDC16	ordinary
FBXL7	AURKA	ordinary
DENND1C	GDI1	ordinary
PIGW	ACSL3	ordinary
MCOLN3	ANXA2	ordinary
COMMD8	NEDD8	ordinary
IKBKE	IRF7	ordinary
GLE1	NUP214	ordinary
NUP85	SNRPE	ordinary
CATSPER2	ITGB5	ordinary
PSMD2	TNFSF12	ordinary
STIM1	SLC24A3	ordinary
SRSF10	HNRNPR	ordinary
TNRC6C	NOTCH1	ordinary
ARHGEF12	RHOG	ordinary
SPCS3	RPN2	ordinary
MFSD2A	CAMK2D	ordinary
RB1	SMC4	ordinary
MCM3	PRIM2	ordinary
NEDD8	BIRC5	ordinary
MSRB3	LARS	ordinary
EXOSC7	IMP4	ordinary
GPT	TTLL11	ordinary
SLC7A11	DLG1	ordinary
POLE	TOP3A	ordinary
PSMB9	TNFSF13B	ordinary
IFT122	PDE7B	ordinary
C1D	WDR43	ordinary
GNPDA1	PFKL	ordinary
RPS5	RRP9	ordinary
NUP62	GEMIN7	ordinary
AP2M1	FZD5	ordinary
MDC1	TP53BP1	ordinary
MADD	RAB27A	ordinary
PSMA1	SKP2	ordinary
SLC35A3	MGAT4B	ordinary
RAD1	CHEK1	ordinary
TP53	BTG2	ordinary
BTC	TEC	ordinary
FGF7	FGF2	ordinary
HBEGF	INPP5J	ordinary
PDPK1	RPS6KA3	ordinary
STXBP1	GAD1	ordinary
PIP5K1B	PLCB3	ordinary
IL1RL1	BAG4	ordinary
ATP6V1G1	NME1	ordinary
SOS2	RHOBTB1	ordinary
CALM2	TRPM2	ordinary
SLC24A3	STIM1	ordinary
GAB1	GRB2	ordinary
NUP205	HDAC4	ordinary
COPS7B	CCNF	ordinary
CUL3	GLI3	ordinary
UQCRB	CYCS	ordinary
STON2	ARPC2	ordinary
STON1	ARPC1A	ordinary
ORAI1	SORBS1	ordinary
RPS16	IMP3	ordinary
P2RX4	ANXA1	ordinary
POM121	KPNB1	ordinary
PSMD13	LTBR	ordinary
HIST3H2BB	HIST1H3D	ordinary
SLC26A6	ANO9	ordinary
SLC25A13	PAICS	ordinary
CDK5R1	CDC25B	ordinary
AHCYL2	TRPM4	ordinary
SLC5A6	HLCS	ordinary
IRAK3	TOLLIP	ordinary
PSMD10	ANAPC10	ordinary
DVL3	IL1RAP	ordinary
TYROBP	NCKAP1L	ordinary
AKAP1	TPM2	ordinary
STX1A	ORAI2	ordinary
SPTBN4	CD55	ordinary
CREBBP	PPARA	ordinary
RHOG	RHOC	ordinary
SLC46A1	DHFR	ordinary
DHFR	TYMS	ordinary
ATM	POLK	ordinary
SLC24A1	TRPM7	ordinary
FAM13B	RHOJ	ordinary
CDC42	KIF2C	ordinary
SH2D2A	FGFR2	ordinary
ORAI2	CALM1	ordinary
CACNB3	CACNB1	ordinary
ESRRA	ATP5B	ordinary
ERBB3	FGF1	ordinary
GRB2	PIK3AP1	ordinary
ORC2	POLE2	ordinary
VAV2	RASGRP1	ordinary
CACNG4	DMD	ordinary
PSMB6	OAZ1	ordinary
GFPT1	GNPNAT1	ordinary
AAK1	INPP4A	ordinary
LAMTOR5	EEF1E1	ordinary
FAM20A	MEN1	ordinary
ENY2	HIST1H3H	ordinary
PPP5C	RAF1	ordinary
IL3RA	STAT5B	ordinary
HRAS	ITGB3	ordinary
NCK1	PRKCH	ordinary
KDR	CD80	ordinary
PSMB4	NPEPPS	ordinary
CD3D	ZAP70	ordinary
TRIM24	FGFR4	ordinary
TOP3A	PRPF19	ordinary
FAAP100	UBE2T	ordinary
NUP155	XPOT	ordinary
SLC39A6	KCNJ11	ordinary
UBA52	RFC4	ordinary
AKT3	FOXO3	ordinary
TAF6	TP53	ordinary
ALAS1	OGDH	ordinary
RAD51C	CDK4	ordinary
DLG4	PPP3CB	ordinary
B2M	CD247	ordinary
GAB2	BRK1	ordinary
PSMA6	CUL2	ordinary
GPSM2	S1PR1	ordinary
PIK3R6	SGIP1	ordinary
NECAP2	VAMP3	ordinary
CATSPERB	TNNT1	ordinary
PSMD1	CUL3	ordinary
MCOLN1	PPP3R1	ordinary
AP2B1	ROR1	ordinary
TFRC	PLEKHA1	ordinary
NRG4	MYO18A	ordinary
PHLPP1	AKT2	ordinary
AKT2	GSK3A	ordinary
PLCH1	PRKCA	ordinary
FGF2	FGFR3	ordinary
B3GAT3	AGRN	ordinary
CAMK2G	EPB41L1	ordinary
EXOSC1	WDR46	ordinary
PSMB2	ANAPC15	ordinary
SSU72	NABP2	ordinary
KLRD1	ITK	ordinary
FYN	FCER1G	ordinary
HIST1H2BH	DCLRE1C	ordinary
PSMB5	REL	ordinary
KPNA1	BANF1	ordinary
PPP2R5A	AKT3	ordinary
HIP1R	TF	ordinary
LPCAT4	PLBD1	ordinary
STRADB	PRKAG2	ordinary
PRKAB2	MTOR	ordinary
C1S	C1R	ordinary
C4B	C4A	ordinary
CCT2	BBS2	ordinary
SREBF1	SCD	ordinary
ACOX1	HSD17B4	ordinary
CD79B	BLNK	ordinary
PIK3CD	NECAP2	ordinary
CHD3	UBTF	ordinary
EREG	SHC1	ordinary
ACAA2	ALDH6A1	ordinary
PTPN6	IFNAR2	ordinary
IFNAR2	IFNAR1	ordinary
GNGT1	INPP5K	ordinary
CALM1	IQGAP2	ordinary
SLC4A7	SCN4B	ordinary
TRPM2	CPNE3	ordinary
TREM2	ZMYM2	ordinary
ESPL1	CDCA5	ordinary
KLHL12	DVL2	ordinary
DVL2	HGS	ordinary
BCR	WASF2	ordinary
CACNA1D	CATSPERG	ordinary
CATSPERG	NEB	ordinary
POM121C	KPNA1	ordinary
NUP188	ALYREF	ordinary
HSPA9	HSPD1	ordinary
GNA14	PRKCD	ordinary
PRKCE	GNAZ	ordinary
CTSC	SEC24D	ordinary
PIK3R1	ITSN1	ordinary
RCOR1	HIST1H2BH	ordinary
SLC5A3	SLC9A6	ordinary
SLC4A4	FGF13	ordinary
HERC2	KDM4A	ordinary
PPP3R1	YWHAQ	ordinary
PLPP5	PRKCE	ordinary
CD3G	CD28	ordinary
PIP5K1C	TREM2	ordinary
SEC24C	SEC23IP	ordinary
NDST1	SDC1	ordinary
CLIC2	VCL	ordinary
NUP88	GEMIN4	ordinary
P2RX1	MYL5	ordinary
ARPC3	IGF2R	ordinary
TNKS	PTEN	ordinary
PRKCD	CARD9	ordinary
PSME1	CD40	ordinary
IRS1	VAV2	ordinary
PSME3	CDC27	ordinary
NIP7	UTP4	ordinary
AK8	TULP3	ordinary
TULP3	PDE1C	ordinary
ATP1B3	SLC12A6	ordinary
GNG2	RASGRP3	ordinary
COLGALT1	COL5A3	ordinary
POLB	PARP2	ordinary
PSMC2	CDC23	ordinary
PSMC3	ANAPC11	ordinary
ARPC5	VAMP4	ordinary
TGOLN2	ACTR3	ordinary
ATP2B1	ATP2A2	ordinary
DCAF11	CUL4B	ordinary
CLCA2	SLC6A11	ordinary
STAT3	ICAM1	ordinary
BARD1	FANCL	ordinary
CACNA2D3	PXN	ordinary
COPS2	FEM1B	ordinary
HAGH	BSG	ordinary
NDC1	CPSF1	ordinary
ARFGAP2	RAB1B	ordinary
PSMD6	UBE2E1	ordinary
GNG11	CACNA1C	ordinary
TTC37	PPAT	ordinary
GMPR2	GLUL	ordinary
IL33	ERLIN2	ordinary
PRKACA	KCNS3	ordinary
ABHD6	AQP9	ordinary
FXYD3	KCNQ1	ordinary
NCOA1	GRHL1	ordinary
RPS28	UTP14C	ordinary
PSMA7	TPP2	ordinary
ACTB	RAC1	ordinary
SUPT16H	BRCA1	ordinary
PPA2	SUCLG2	ordinary
MCCC2	AUH	ordinary
PSMD11	BLMH	ordinary
POLD3	DNA2	ordinary
RAC2	RHOB	ordinary
EXOSC8	UTP6	ordinary
GNG5	ITPKB	ordinary
FGFR4	FGFR1OP	ordinary
ATR	MCM2	ordinary
COPS4	FBXL5	ordinary
EPHA10	RHOA	ordinary
FXYD6	SCN1B	ordinary
PLCE1	DGKZ	ordinary
SRI	MASP1	ordinary
SLC8A1	ATP2B4	ordinary
VDAC1	MICU3	ordinary
SMDT1	SLC8B1	ordinary
SPRED1	HRAS	ordinary
HDAC8	SMC1A	ordinary
NUP133	IPO8	ordinary
LYN	CDKN1C	ordinary
CDKN1C	E2F4	ordinary
SLC22A5	AKAP1	ordinary
SOCS1	TLR2	ordinary
ARHGEF9	RHOBTB2	ordinary
CA2	ATP6V0E2	ordinary
HSP90AA1	CNTRL	ordinary
RAB8A	CALM2	ordinary
SPIDR	XRCC2	ordinary
ARRB1	EPS15L1	ordinary
PIP5K1A	MTMR3	ordinary
RYR3	PPFIA4	ordinary
FOLH1	TTLL7	ordinary
MARC1	MARS	ordinary
PSMA5	TNFRSF12A	ordinary
NEFL	CLCA2	ordinary
GPR161	PDE2A	ordinary
PSME2	EGLN1	ordinary
QDPR	HSP90AA1	ordinary
VAV1	LAT2	ordinary
TSC1	LAMTOR3	ordinary
RTEL1	RAD51AP1	ordinary
NUPL2	SNRPB	ordinary
RAD50	ERCC8	ordinary
RFC1	PALB2	ordinary
PDP2	PDHB	ordinary
PDHA1	CS	ordinary
DHRS9	ALDH1A1	ordinary
ALDH1A1	CRABP2	ordinary
PPP2CA	FOXM1	ordinary
CASP3	STK4	ordinary
SPTAN1	COPZ2	ordinary
P3H1	COL6A2	ordinary
CBX4	CETN2	ordinary
NGFR	CASP2	ordinary
LIG3	ZNF830	ordinary
GTF2H3	POLR2J	ordinary
FAM114A2	MAP2K2	ordinary
MAPK3	RPS6KA5	ordinary
PARP1	SMAD4	ordinary
WTIP	HIF3A	ordinary
SUMO1	CDCA8	ordinary
TRPV4	CACNB3	ordinary
TRPM6	TMOD2	ordinary
DVL1	SH2D2A	ordinary
GNA11	ITPKA	ordinary
MAP3K11	ARAF	ordinary
ARAF	ATG7	ordinary
CHRNB4	VDAC2	ordinary
BTRC	SUFU	ordinary
CACFD1	SORBS3	ordinary
TRAPPC13	CHM	ordinary
CHM	RAB25	ordinary
PSMA2	ANAPC16	ordinary
SEPT2	PLK4	ordinary
GNAS	PRKAR2B	ordinary
ACSS1	HMGCS2	ordinary
CS	CPT2	ordinary
PTDSS1	SLC44A1	ordinary
RMI2	XRCC1	ordinary
MSRB1	MAT2A	ordinary
GNB5	CACNB2	ordinary
TGFBR2	TGFBR1	ordinary
NEK6	NUP62	ordinary
BRIP1	MNAT1	ordinary
CDK7	CCNB1	ordinary
HOXA1	RBBP5	ordinary
PSMA3	ANAPC7	ordinary
RB1CC1	ATG14	ordinary
PIK3C3	GABARAPL1	ordinary
PPARGC1B	ALAS1	ordinary
BLNK	DAPP1	ordinary
CSK	MAP2K1	ordinary
TBL1X	G0S2	ordinary
CSGALNACT1	DCN	ordinary
LOXL4	PXDN	ordinary
SYNJ2	MTMR6	ordinary
PI4K2A	SH3GL1	ordinary
NFIA	POLR1C	ordinary
EXOSC5	UTP18	ordinary
SOS1	PIK3R1	ordinary
SLC25A6	ATP6V1F	ordinary
ADCY6	HCN3	ordinary
CLTC	AP1G1	ordinary
POLD2	RAD51	ordinary
GOT2	SLC25A12	ordinary
GATAD2B	BRPF3	ordinary
EXOSC2	RCL1	ordinary
SLC38A2	GFPT1	ordinary
CNOT6L	EIF4E	ordinary
FCHO2	AP2M1	ordinary
DGKE	LPIN2	ordinary
PIK3AP1	TRIM24	ordinary
MYO18A	CYFIP1	ordinary
GNS	HEXB	ordinary
HEXA	CTSA	ordinary
HCN3	ATP1B3	ordinary
NUP153	HNRNPC	ordinary
PSMC4	SPOP	ordinary
FGFR3	VAV3	ordinary
POLK	RAD50	ordinary
KAT5	FANCA	ordinary
FCGR1A	FGF7	ordinary
MB21D1	TMEM173	ordinary
RRM1	TXN	ordinary
RPS23	NOC4L	ordinary
ITK	RASGRP2	ordinary
CACNA2D4	CPLX1	ordinary
ATP2A2	NOTCH3	ordinary
POLR2J	EPAS1	ordinary
FNTA	GNGT1	ordinary
USP34	TNKS2	ordinary
ITPR2	SLC8A1	ordinary
PPAT	SLC7A11	ordinary
SLC35C1	FUT3	ordinary
SLC6A6	ANO7	ordinary
ATP1A3	KCNMA1	ordinary
WDR77	SNRPG	ordinary
MNAT1	TCF3	ordinary
PPP6R1	SEC24C	ordinary
MOB1A	WWTR1	ordinary
WWTR1	CTGF	ordinary
TPR	XPO1	ordinary
CTSL	B2M	ordinary
CLNS1A	SNRPD2	ordinary
SIRT1	TAF1A	ordinary
SMARCD3	RGL1	ordinary
EXOSC4	TBL3	ordinary
CCT3	BBS1	ordinary
RRP1	RRP7A	ordinary
PHKA2	PYGL	ordinary
SSB	POLR3GL	ordinary
PAK2	CTTN	ordinary
CD80	ABI1	ordinary
RPA2	SERPINH1	ordinary
FBXO9	UBE2M	ordinary
POLR2L	NELFE	ordinary
NME2	ADCY4	ordinary
ADCY2	PDE3A	ordinary
ICOS	FCGR1A	ordinary
PIK3C2B	FCHO1	ordinary
RAC1	RALA	ordinary
RPS24	UTP14A	ordinary
SCNN1B	AKAP9	ordinary
CHST3	CSPG4	ordinary
TRPA1	MYL6B	ordinary
SLC7A7	SLC4A4	ordinary
MAPK11	CBX2	ordinary
CBX2	SUMO1	ordinary
PNPLA4	RETSAT	ordinary
DGAT2	FITM2	ordinary
PRMT5	GEMIN2	ordinary
RANBP2	KPNA5	ordinary
TPCN2	NFATC3	ordinary
ADAM17	NGFR	ordinary
INPP5K	EPN2	ordinary
PSMD9	ANAPC5	ordinary
PTK6	KHDRBS1	ordinary
FGF1	GAB2	ordinary
NUP37	SMN1	ordinary
STRADA	PRKAB1	ordinary
P4HA1	COL4A5	ordinary
NECAP1	M6PR	ordinary
EPN2	CLTCL1	ordinary
UBE2M	FBXW11	ordinary
RGS3	GNA11	ordinary
HDAC10	HIST1H2BJ	ordinary
RGS19	GNA15	ordinary
DCUN1D5	CUL5	ordinary
AK7	ADCY5	ordinary
ADCY1	RAPGEF4	ordinary
SCMH1	CBX4	ordinary
IGF2R	MYO10	ordinary
CAMK2D	PPP3CA	ordinary
AHCTF1	STAG2	ordinary
DIAPH2	KNTC1	ordinary
FAAH	CYP2J2	ordinary
NUP35	GEMIN6	ordinary
P3H2	COL14A1	ordinary
KDM1A	H3F3B	ordinary
CTSF	HLA-DPB1	ordinary
HLA-DPB1	CD3E	ordinary
GPAT4	SLC25A16	ordinary
PRKAA2	TSC1	ordinary
HIBCH	BCKDHB	ordinary
PAN2	EIF4A3	ordinary
NPEPPS	THOP1	ordinary
LCK	CTLA4	ordinary
CD86	FCGR2A	ordinary
STAM2	EPS15	ordinary
GBA2	SLC2A1	ordinary
ERLEC1	IHH	ordinary
PIAS1	SATB1	ordinary
ST6GALNAC2	SLC35A1	ordinary
PI4K2B	REPS2	ordinary
SMOX	CAT	ordinary
COPS5	COMMD5	ordinary
PSMB1	NUMB	ordinary
AP2S1	ARPC3	ordinary
TRPC4AP	CPNE1	ordinary
PPIB	COL12A1	ordinary
APH1B	ITGB3BP	ordinary
ITGB3BP	MAPK8	ordinary
DENND5B	CHML	ordinary
NCL	PDCD11	ordinary
CACNB4	TTN	ordinary
PSMD8	RNF146	ordinary
CPSF6	CYFIP2	ordinary
CREB1	PER1	ordinary
FZR1	MCM5	ordinary
PIGH	PIGL	ordinary
DCTN6	AR	ordinary
SEC24D	SEC31A	ordinary
F5	SAR1B	ordinary
MPDU1	ALG9	ordinary
ALG9	ALG6	ordinary
GOT1	SLC25A13	ordinary
HADHA	ACADM	ordinary
ATP6V0A2	ABCC4	ordinary
GNG4	CACNA2D2	ordinary
TTYH3	SLC12A2	ordinary
PPP2R1B	RBL2	ordinary
YWHAB	QKI	ordinary
AHCYL1	TPM4	ordinary
COPS8	KLHL5	ordinary
NBN	TCEA1	ordinary
XRCC5	PRKDC	ordinary
GUCY1B3	PDE5A	ordinary
PRKG2	KCNMB1	ordinary
RYR1	DES	ordinary
CTSD	HLA-DQB1	ordinary
HLA-DQB1	CD3D	ordinary
PTPRJ	HLA-DRB1	ordinary
FADD	CASP8	ordinary
ANO1	SLC6A14	ordinary
SLC6A14	SLC12A7	ordinary
CERS2	ATAT1	ordinary
ARF6	ITSN2	ordinary
PSMB7	ANAPC2	ordinary
PLCB4	SYNJ1	ordinary
SYNJ1	PIK3R3	ordinary
IPPK	IP6K1	ordinary
IP6K1	PPIP5K1	ordinary
ACOT4	SCP2	ordinary
ACAA1	ACOT8	ordinary
DEK	H2AFV	ordinary
MPHOSPH6	NOL11	ordinary
AKAP9	SRI	ordinary
BRAF	KIAA1549	ordinary
CHD9	PEX11A	ordinary
SCNN1G	CAMK2G	ordinary
GPSM3	CCR1	ordinary
NCOA2	ACOX1	ordinary
RPS15A	FBL	ordinary
SLC12A2	KCNAB1	ordinary
SMAD7	SMAD2	ordinary
NUP58	KPNA3	ordinary
CNTRL	ABI2	ordinary
RPS3A	NOP58	ordinary
B3GAT2	GPC1	ordinary
MAOA	PRDX6	ordinary
GPX2	GSR	ordinary
CAPZA1	HSP90AB1	ordinary
HSP90AB1	LIMK1	ordinary
FRS2	CPSF6	ordinary
RMI1	FAAP24	ordinary
RABGGTB	RAB17	ordinary
CDKN1A	ORC6	ordinary
FRAT1	PPP2R1B	ordinary
GCNT3	MUC4	ordinary
PSMD7	GTSE1	ordinary
FGF13	AHCYL2	ordinary
CCND3	E2F3	ordinary
GPSM1	GPER1	ordinary
CRTC2	PPARGC1A	ordinary
SPCS1	RPL15	ordinary
TP53BP2	BAX	ordinary
LYPLA2	ACSL1	ordinary
BLMH	TAP1	ordinary
AGO4	NOTCH2	ordinary
KDM4D	HIST1H3G	ordinary
PIK3R3	FNBP1	ordinary
SH3GL1	ADRB2	ordinary
PDHB	ACAA2	ordinary
LPCAT1	PTDSS1	ordinary
SLC39A8	S100A7	ordinary
PSMC3IP	RPA1	ordinary
PSMC6	EGLN3	ordinary
GMPPA	SLC35D2	ordinary
PIK3CG	PACSIN3	ordinary
DDB2	XPC	ordinary
B3GNTL1	MUC16	ordinary
NOL12	SNU13	ordinary
TNRC6B	RUNX1	ordinary
HLCS	ACACB	ordinary
PSMC1	MAD2L1	ordinary
NCALD	VDAC3	ordinary
HS3ST3B1	GPC6	ordinary
METTL14	POLR2B	ordinary
RING1	UBE2I	ordinary
CHRNA5	STX1A	ordinary
BAG4	WASF1	ordinary
ADRB2	PTPN13	ordinary
ORC4	PRIM1	ordinary
THEM4	ACSF2	ordinary
RPS27	RPS9	ordinary
VCL	MAPK1	ordinary
MAPK1	ELK1	ordinary
GRIN2D	TPM3	ordinary
P2RX5	VIM	ordinary
PDGFRA	BAIAP2	ordinary
LIG1	ISY1	ordinary
GRAP2	RASGRP4	ordinary
DTX4	IRF3	ordinary
IL10RA	JAK1	ordinary
JAK1	IL10RA	ordinary
RPS13	RPS14	ordinary
SLC6A11	GABRQ	ordinary
LAMTOR3	AIMP1	ordinary
CLCA4	SLC6A1	ordinary
SUPT4H1	POLR2G	ordinary
POFUT2	ADAMTS1	ordinary
PIK3C2A	PIKFYVE	ordinary
HDAC6	MID1IP1	ordinary
ATP2B4	TPM1	ordinary
RUNX3	LEF1	ordinary
RUVBL2	DKC1	ordinary
USP3	HIST1H2BC	ordinary
ARF1	COPZ1	ordinary
TSC2	MLST8	ordinary
AP2A1	TFRC	ordinary
DCTN1	AJUBA	ordinary
PDE8A	AMPD2	ordinary
LOX	MFAP5	ordinary
ARF5	TMED7	ordinary
ATXN7	HIST2H2BF	ordinary
DNA2	FANCG	ordinary
CC2D2A	RAB8A	ordinary
SEC16A	SEC22C	ordinary
MCFD2	SEC24A	ordinary
SLC6A15	ATP1B1	ordinary
CFTR	PIP5K1B	ordinary
PDPN	DAGLA	ordinary
PNPLA2	GK	ordinary
RGS1	GNAI2	ordinary
TOMM5	CYC1	ordinary
REST	HIST3H2BB	ordinary
MID1IP1	ELOVL5	ordinary
ARHGEF1	RAC2	ordinary
FKBP1B	ACTG2	ordinary
DCTN4	NR3C2	ordinary
TGIF2	SERPINE1	ordinary
TRPC1	ITGA1	ordinary
ABCA6	LCAT	ordinary
HDAC4	RUNX3	ordinary
DCLRE1A	FANCM	ordinary
ST6GALNAC4	MUC12	ordinary
ARHGAP17	RHOF	ordinary
P2RX7	ANXA6	ordinary
MAP2K6	CDH2	ordinary
MAPK12	MEF2D	ordinary
PIK3CA	SNX18	ordinary
PLCD3	ITPR3	ordinary
DUSP9	MAPK3	ordinary
TMED5	WNT2	ordinary
DLG1	ATP2C1	ordinary
PLCG2	LY96	ordinary
FAM20C	LGALS1	ordinary
DNAJB1	HSPA1B	ordinary
GMPS	TTLL5	ordinary
INPP4A	SBF2	ordinary
CTNNB1	AXIN2	ordinary
TRPV3	TNNT2	ordinary
MEN1	HIST1H2BK	ordinary
FTSJ3	DHX37	ordinary
DNAJC6	SNX2	ordinary
GALNT5	MUC5AC	ordinary
CLCN5	SLC4A8	ordinary
SLC39A1	S100A9	ordinary
SLC25A5	MB21D1	ordinary
CSNK2A1	SMC2	ordinary
AMER1	CTNNB1	ordinary
PRKCA	MMP3	ordinary
SPHK1	PLPP3	ordinary
PSMD5	CDC26	ordinary
ITGB3	KDR	ordinary
CDK4	TFDP2	ordinary
CDKN1B	MCM6	ordinary
MMP1	IGFBP3	ordinary
PIP4K2C	TYROBP	ordinary
NEK7	NDC1	ordinary
NEK9	NUP188	ordinary
RFC2	RAD51B	ordinary
GTF2H5	POLR2I	ordinary
ASPH	LMOD1	ordinary
P4HA2	COL5A1	ordinary
PDE3A	GMPR	ordinary
LAMTOR2	AIMP2	ordinary
CCND1	TFDP1	ordinary
TFDP1	TK1	ordinary
BMP1	LOXL2	ordinary
TRMT112	AHCY	ordinary
PACSIN2	TGOLN2	ordinary
RPS11	DDX49	ordinary
ACHE	SLC44A3	ordinary
SLC44A4	CHKA	ordinary
MAT2A	TRMT112	ordinary
CDK11B	CEP131	ordinary
ERCC4	TOPBP1	ordinary
ITPR3	ATP2A3	ordinary
EXOSC9	UTP3	ordinary
CACNB1	ATP2A1	ordinary
DNAJB6	HSPA6	ordinary
NUP210	SYMPK	ordinary
POLE3	RMI1	ordinary
MCOLN2	CPNE7	ordinary
SGMS2	TRPC6	ordinary
TRPC6	RASGRF2	ordinary
ATP1A1	ABCC9	ordinary
ERCC1	RFC2	ordinary
RFC5	BRIP1	ordinary
EXOSC3	NOL6	ordinary
NFIX	POLR3K	ordinary
SNX9	WNT5A	ordinary
RBL2	MYBL2	ordinary
DAB2	CD4	ordinary
COPS7A	SPSB2	ordinary
GLS	NAGS	ordinary
CNGA1	TMOD1	ordinary
PTPN11	NCKAP1	ordinary
NUP43	DDX20	ordinary
ZMYM2	SOS1	ordinary
ADCY7	IQGAP1	ordinary
PCYT1B	CHPT1	ordinary
CHPT1	PAFAH1B1	ordinary
CTPS1	SLC25A22	ordinary
SKIV2L2	UTP15	ordinary
TAP1	ERAP2	ordinary
CD79A	PRKCQ	ordinary
MVK	PMVK	ordinary
TTC21B	AKAP5	ordinary
OCRL	OSBP	ordinary
CCT5	BBS4	ordinary
ZCCHC11	EIF4B	ordinary
ACSL5	ORMDL3	ordinary
CHPF2	BGN	ordinary
NIPAL3	MMGT1	ordinary
RAP1A	SYK	ordinary
BPNT1	NSF	ordinary
LDHA	SLC16A1	ordinary
PSMB10	UBE2C	ordinary
MMP9	COL16A1	ordinary
AAAS	SNRPD3	ordinary
SAP30	H2AFZ	ordinary
ARF4	KDELR2	ordinary
FCHO1	PIP5K1C	ordinary
ARID4A	HIST1H2BN	ordinary
EXOSC10	WDR75	ordinary
PLXNA4	DPYSL3	ordinary
CAB39	PRKAB2	ordinary
MMP19	LAMC2	ordinary
HIST1H3D	HIST1H4H	ordinary
INPPL1	AAK1	ordinary
TRPV2	DYSF	ordinary
RBPJ	HEYL	ordinary
CENPH	DIAPH2	ordinary
SLC5A1	AKR1B1	ordinary
VEGFA	KL	ordinary
PSMC5	CKS1B	ordinary
VAMP7	ACTR2	ordinary
NUP54	FIP1L1	ordinary
SYK	DGKD	ordinary
ADRA2C	GNG7	ordinary
GUK1	TTC21B	ordinary
TRPV6	MYH3	ordinary
CHRM3	GNAQ	ordinary
HS2ST1	SDC3	ordinary
PIK3CB	FNBP1L	ordinary
MCM8	POLA1	ordinary
CTH	SERINC1	ordinary
DUOX1	GPX3	ordinary
CLTB	VAMP8	ordinary
ARFGAP3	USO1	ordinary
SLC4A8	CA2	ordinary
PMPCA	PHB	ordinary
ERLIN2	WASF3	ordinary
SLC25A1	ACO2	ordinary
IL2RB	STAT5A	ordinary
SEH1L	SNRPD1	ordinary
CRTAP	COL1A1	ordinary
PAICS	ADSL	ordinary
GALNT4	MUC17	ordinary
SLC25A22	FPGS	ordinary
PCOLCE2	COL5A2	ordinary
SLC9A2	SLC9A7	ordinary
AK9	WDR19	ordinary
PEBP1	AP3B1	ordinary
XRCC1	XAB2	ordinary
INO80D	COPS6	ordinary
BMPR2	BMPR1B	ordinary
ERAP2	TAP2	ordinary
TAP2	ERAP1	ordinary
CACNA2D1	CALD1	ordinary
MEAF6	HIST1H2AG	ordinary
POLD4	BLM	ordinary
HMOX2	BLVRB	ordinary
FOS	MSH2	ordinary
ELOVL4	ACSL5	ordinary
CHSY1	VCAN	ordinary
SMPD2	ASAH2	ordinary
PDGFA	FGFR1	ordinary
SPTBN1	ARCN1	ordinary
AMPH	FZD4	ordinary
ATF4	DDIT3	ordinary
DHCR7	DHCR24	ordinary
GNAI2	CD209	ordinary
CDC37	GAB1	ordinary
SLC35B2	CHST1	ordinary
RUNX1	NR4A3	ordinary
MBTPS1	ATF6	ordinary
EPHB4	EFNB3	ordinary
IFT140	PDE1B	ordinary
REEP1	GNB1	ordinary
RBM28	HEATR1	ordinary
LCP2	BTK	ordinary
AGPAT1	HDAC6	ordinary
PHC1	HNRNPK	ordinary
GALNT15	MUC3A	ordinary
SARDH	GARS	ordinary
LPCAT3	STARD10	ordinary
KCNH8	ATP1A3	ordinary
LZTFL1	BBS9	ordinary
P3H3	COL6A1	ordinary
RNF2	BMI1	ordinary
PRDX5	TXN2	ordinary
MAT2B	INMT	ordinary
AGBL3	SLC3A2	ordinary
SLC3A2	GCLC	ordinary
PSMF1	BUB1B	ordinary
PDGFRB	FYN	ordinary
MMP7	SPP1	ordinary
BOP1	BMS1	ordinary
HSD17B7	EBP	ordinary
CLCN3	TTYH3	ordinary
ACTR5	DDB2	ordinary
NEURL1	DLL1	ordinary
SRC	SPTBN1	ordinary
RIPK3	RIPK1	ordinary
PIGO	PIGU	ordinary
PIGU	PLAUR	ordinary
CA13	AQP11	ordinary
RCHY1	RFC5	ordinary
STAT2	STAT1	ordinary
TYK2	IL27RA	ordinary
KCNK3	FXYD3	ordinary
TP63	PERP	ordinary
WDR35	PDE8B	ordinary
DNM2	AP2A2	ordinary
SGK3	SCNN1B	ordinary
NUDT5	PRPS2	ordinary
AGTPBP1	NICN1	ordinary
FURIN	MMP11	ordinary
MMP14	LAMB1	ordinary
SH3KBP1	NCK1	ordinary
RGS5	GNAI3	ordinary
UAP1	PIGC	ordinary
PDK3	PDHA1	ordinary
UBE2D1	SMAD1	ordinary
PC	GOT2	ordinary
GALNT12	MUC5B	ordinary
NTN1	PLCG1	ordinary
LPL	APOE	ordinary
EBNA1BP2	PELP1	ordinary
PDK2	PDHX	ordinary
CSNK2B	NCAPG	ordinary
RILP	HLA-DRA	ordinary
RAB43	STX6	ordinary
C4A	C4B	ordinary
ZNRF3	FZD8	ordinary
CYB5B	KARS	ordinary
EXOSC6	NOP56	ordinary
STAT4	LCP1	ordinary
EPN1	CLTB	ordinary
ITPA	GMPS	ordinary
SPRED2	NF1	ordinary
DYNC1LI1	PTGES3	ordinary
CAD	TTLL4	ordinary
AGBL5	TPGS2	ordinary
POLR2B	ATR	ordinary
MASTL	ARPP19	ordinary
SCN8A	SLC4A7	ordinary
SLC25A26	MRM1	ordinary
HSD17B10	SLC25A26	ordinary
SLC38A9	RARS	ordinary
GGCT	CARS	ordinary
MAPK6	NCOA3	ordinary
STK11	PRKAA2	ordinary
PLA2G4E	MBOAT1	ordinary
MBOAT1	OSBPL10	ordinary
PINK1	MTERF3	ordinary
BTK	WIPF1	ordinary
UNC13B	ACHE	ordinary
EID3	RAD21	ordinary
TFDP2	CDT1	ordinary
PSME4	ANAPC1	ordinary
SERPINH1	HSF1	ordinary
ENO2	PKM	ordinary
RABGGTA	RAB3D	ordinary
ARL2	ADCY6	ordinary
FAM96B	POLD1	ordinary
OAT	ABAT	ordinary
NSMCE4A	SMC3	ordinary
TRPM4	SLC9A8	ordinary
ARL2BP	ADCY3	ordinary
RPA3	HSPH1	ordinary
CLIP3	TNF	ordinary
BRAP	BRAF	ordinary
METAP2	DARS	ordinary
BBS10	TTC8	ordinary
RPS6KA2	CEBPB	ordinary
YY1	RAD23B	ordinary
RAE1	WDR33	ordinary
NPL	MPC1	ordinary
UCHL1	RPS27A	ordinary
RPS27A	POLD2	ordinary
PLCB1	DGKE	ordinary
TMEM129	UBE2J2	ordinary
DGAT1	PNPLA4	ordinary
FZD2	AMER1	ordinary
IDH1	HIF1AN	ordinary
PIGL	ACSS2	ordinary
STK4	LATS2	ordinary
SLC8B1	CACFD1	ordinary
CA9	NT5E	ordinary
SLC6A1	CLCA4	ordinary
GNAQ	DGKH	ordinary
ADCY9	PDE4A	ordinary
SENP2	SUMO2	ordinary
DDX21	TEX10	ordinary
RPS8	RPS7	ordinary
MUS81	KAT5	ordinary
UBQLN2	ARRB1	ordinary
AADAT	AASS	ordinary
P4HA3	COL6A3	ordinary
PPP1CB	CRY2	ordinary
MTFMT	MTHFD1L	ordinary
VAV3	INPP5A	ordinary
NME1	ATP6V0A2	ordinary
ADCY4	PDE8A	ordinary
HSD3B7	PTGIS	ordinary
OSBPL8	SACM1L	ordinary
SPCS2	RPS3	ordinary
SLC35A1	ST6GALNAC2	ordinary
SEC11A	RPS17	ordinary
MMP10	BCAN	ordinary
PGM2L1	PGAM1	ordinary
IL6ST	JAK2	ordinary
CDK11A	NEK2	ordinary
TGS1	SNRPF	ordinary
SLX4	BRCA2	ordinary
NUP50	CPSF3	ordinary
RNF5	UBB	ordinary
SEL1L	CFTR	ordinary
ATP6V0A1	DTYMK	ordinary
PI4KA	PIK3C2A	ordinary
TIMM50	FXN	ordinary
WNT9A	FZD2	ordinary
MORF4L1	HIST3H2A	ordinary
SMAD4	BCL2L11	ordinary
FCER1G	PLCG2	ordinary
UBE2V2	BARD1	ordinary
RHOBTB3	PLIN3	ordinary
MTRR	EPRS	ordinary
HENMT1	TDRKH	ordinary
PPP4R2	RPA3	ordinary
ALDOC	TPI1	ordinary
TPI1	GPD1L	ordinary
ACTR10	NR3C1	ordinary
PCOLCE	LOXL1	ordinary
TNFAIP3	TNFRSF1A	ordinary
CD28	INPP5D	ordinary
MCM6	POLE	ordinary
PRMT1	PRMT6	ordinary
CSF2RA	CSF2RB	ordinary
TNKS1BP1	EIF4G1	ordinary
BDH1	OXCT1	ordinary
OXCT1	SDHA	ordinary
SACM1L	PIGA	ordinary
ADAMTS5	ACAN	ordinary
PTPRC	LCK	ordinary
USP25	DDX58	ordinary
B3GNT8	MUC15	ordinary
FAR1	AGPS	ordinary
ALOX5AP	ALOX12	ordinary
SUMF1	ARSG	ordinary
LIN7A	PPFIA1	ordinary
CILP	IGF2	ordinary
WDR19	PDE4D	ordinary
BIN1	SLC2A8	ordinary
TNFSF10	RIPK3	ordinary
AMT	MTHFD2	ordinary
SLC6A8	CKB	ordinary
LIN7C	UNC13B	ordinary
DYRK1A	RBBP4	ordinary
LIN54	RBL1	ordinary
SLC39A10	S100A8	ordinary
NUP214	NCBP1	ordinary
PIAS4	KDM4B	ordinary
ZAP70	GRAP2	ordinary
ATP1B2	KCNJ8	ordinary
MTMR1	PPP2R5A	ordinary
PTPN22	HLA-DQA1	ordinary
CACNA2D2	CACNA2D1	ordinary
PRELID1	CDS2	ordinary
CDS2	CRLS1	ordinary
MMP3	HBEGF	ordinary
SUPT5H	SNAPC4	ordinary
TLN1	PTK2	ordinary
NRTN	NRAS	ordinary
ABCA9	CH25H	ordinary
IL27RA	TYK2	ordinary
ALDH4A1	BCAT2	ordinary
GGT7	GRIK5	ordinary
ALDH1B1	ACSS1	ordinary
YME1L1	SMDT1	ordinary
DDAH2	ASS1	ordinary
AGBL2	LRRC49	ordinary
DIO2	SULT1B1	ordinary
SULT1B1	BPNT1	ordinary
CSNK1D	GOSR2	ordinary
PORCN	WNT3	ordinary
SPTBN2	KDELR3	ordinary
RGS2	GNA14	ordinary
GEN1	WRN	ordinary
MAPKAPK5	KALRN	ordinary
MRS2	DLAT	ordinary
CFB	C5	ordinary
IL12RB1	STAT4	ordinary
RAD18	UBE2N	ordinary
MICAL1	GSTP1	ordinary
STK3	MOB1A	ordinary
TP53BP1	MDC1	ordinary
DNMT3B	HIST1H2BD	ordinary
TBC1D1	RAB10	ordinary
KREMEN2	LRP6	ordinary
ANO5	SLC6A9	ordinary
CIT	MYL9	ordinary
FZD5	PARD6A	ordinary
MAPKAPK3	CBX8	ordinary
SLC39A14	GPR39	ordinary
GLB1	PSAP	ordinary
SLC6A20	GRIN2D	ordinary
RDH16	RDH12	ordinary
XPO1	CDK1	ordinary
PLCB2	PRKCB	ordinary
USP1	DCLRE1B	ordinary
PCCB	MCEE	ordinary
MCEE	MUT	ordinary
USP8	LRIG1	ordinary
SLC12A4	SLC4A3	ordinary
ARF3	PIK3C2G	ordinary
HSD17B4	EHHADH	ordinary
HADHB	ECI1	ordinary
GUSB	GLB1	ordinary
RGS11	GNAI1	ordinary
SLC25A16	SLC27A3	ordinary
HSBP1	MRPL18	ordinary
SLC44A2	CHKB	ordinary
CCNF	CUL1	ordinary
SLC1A5	CTPS1	ordinary
ATP6V1C1	AK9	ordinary
SCN9A	NEFL	ordinary
PIK3R5	ARRB2	ordinary
LIN9	CDC25A	ordinary
GMPPB	GMDS	ordinary
CEL	ABCA6	ordinary
POLD1	RBBP8	ordinary
COLGALT2	COL4A3	ordinary
DLG3	ATP2C2	ordinary
ARHGAP19	RHOT1	ordinary
SLC35B4	GCNT4	ordinary
MCM5	POLA2	ordinary
TAB1	IKBKG	ordinary
SMPD3	UGT8	ordinary
B3GLCT	ADAMTS12	ordinary
LIPT1	DBT	ordinary
KDM4A	HERC2	ordinary
ARHGEF4	RHOV	ordinary
ST6GALNAC3	MUC6	ordinary
KIF15	ACTR1A	ordinary
ERCC2	RAD51D	ordinary
NPAS2	KLF15	ordinary
E2F1	RRM2	ordinary
SLC25A37	ISCU	ordinary
DNMT1	H2AFJ	ordinary
JAK2	TRAK1	ordinary
HMGB2	H1F0	ordinary
PPM1K	BCKDHA	ordinary
C1R	C1S	ordinary
MYLK	MYH14	ordinary
SDHC	FH	ordinary
NR2F2	PPARG	ordinary
BRCA1	LIG3	ordinary
CTSS	HLA-C	ordinary
MYH7B	CALM3	ordinary
SREBF2	SQLE	ordinary
MMP12	LAMA3	ordinary
PLCD4	DGAT2	ordinary
GSR	CHAC2	ordinary
CSNK2A2	NCAPH	ordinary
ISG15	KPNA2	ordinary
FOXO3	SOD2	ordinary
XRN1	LSM4	ordinary
PROC	F8	ordinary
INPP5J	BIN1	ordinary
SIGIRR	TLR6	ordinary
REEP5	GNAL	ordinary
BBS12	BBS7	ordinary
ELOVL6	SLC27A2	ordinary
C1GALT1C1	MUC13	ordinary
RFC4	RAD51C	ordinary
PLK3	CDC25C	ordinary
ARL6IP5	TTLL12	ordinary
MND1	DMC1	ordinary
CBFB	SOCS3	ordinary
SOCS3	LEPR	ordinary
CCNA2	MCM3	ordinary
TFAP2A	TGFA	ordinary
LIN37	CDC6	ordinary
RBSN	PIK3R4	ordinary
CHEK2	UBE2V2	ordinary
MAP2K3	MAPKAPK3	ordinary
SLC9A5	DLG4	ordinary
VAMP2	P2RX7	ordinary
PLBD1	LPCAT4	ordinary
PDCD1	CD3G	ordinary
BEST1	AGT	ordinary
ACTL6A	RAD23A	ordinary
PPP1R12B	MYH9	ordinary
PTGER2	GNAS	ordinary
ASRGL1	QARS	ordinary
MVB12A	UBA52	ordinary
LMNB1	HIRA	ordinary
KAT2B	HEY2	ordinary
ABCA5	ABCA9	ordinary
GPLD1	NEGR1	ordinary
TNFRSF10C	TNFRSF10D	ordinary
TNFRSF10A	TNFRSF10B	ordinary
ACSL3	ELOVL6	ordinary
CDK2	MCM8	ordinary
UBC	RFC3	ordinary
GANAB	CALR	ordinary
ANK2	TMED3	ordinary
TDP1	XRCC6	ordinary
RBL1	MYC	ordinary
WWP1	SCNN1G	ordinary
PCNA	RMI2	ordinary
MTX2	TOMM40	ordinary
RFC3	NBN	ordinary
RUVBL1	COPS7A	ordinary
PMM2	GMPPA	ordinary
TNFRSF10B	TNFRSF10A	ordinary
SOD1	PRDX1	ordinary
MFNG	NOTCH4	ordinary
UBE2B	PCNA	ordinary
E2F5	TOP2A	ordinary
POLE2	XRCC3	ordinary
PFAS	GART	ordinary
AOX1	PRDX2	ordinary
RANGAP1	AURKB	ordinary
LIN52	E2F1	ordinary
ADCY5	PDE3B	ordinary
LOXL1	MFAP2	ordinary
EZH2	CDKN2A	ordinary
B4GALT6	FMOD	ordinary
NFYB	TM7SF2	ordinary
GAPDH	TALDO1	ordinary
B4GALT1	OGN	ordinary
TOMM22	ATP5G1	ordinary
GGT6	NCALD	ordinary
PRKAB1	TBC1D1	ordinary
ABCB7	HMOX2	ordinary
CASP7	CLSPN	ordinary
HSPH1	HSPA1L	ordinary
CDK5	YWHAE	ordinary
ARNT	CA9	ordinary
CYB5R1	SLC40A1	ordinary
SAE1	UBA2	ordinary
CASP6	LMNB1	ordinary
ABCB10	FLVCR1	ordinary
CD22	CD79B	ordinary
SLC20A2	SLC9A9	ordinary
WEE1	CDK2	ordinary
MKKS	BBIP1	ordinary
SFRP1	FZD1	ordinary
CD180	CD14	ordinary
FZD4	PLEKHA2	ordinary
FANCB	FANCD2	ordinary
NFIC	POLR3C	ordinary
AMACR	ACOX2	ordinary
VRK2	TMPO	ordinary
PIK3C2G	TRIP10	ordinary
SLC45A3	SLC5A1	ordinary
CCNB2	ZWILCH	ordinary
MYO5A	EXOC5	ordinary
RACGAP1	CDC42	ordinary
GUCY1A2	PDE1A	ordinary
PLK1	KIF23	ordinary
CCNB1	CENPH	ordinary
FANCI	ATM	ordinary
MYBL2	PLK1	ordinary
POLQ	PARP1	ordinary
DEPDC1B	RHOT2	ordinary
LAMA1	HGF	ordinary
ETFDH	ETFB	ordinary
MMP2	MMP9	ordinary
POLR2D	SALL4	ordinary
PMM1	GMPPB	ordinary
SLC25A11	GOT1	ordinary
MMP13	LAMB3	ordinary
PDE2A	GMPR2	ordinary
MRGBP	HIST1H2AC	ordinary
FOXP3	IL2RA	ordinary
TADA2B	HIST2H2BE	ordinary
GNAZ	PDE7A	ordinary
DENND2C	RAB9B	ordinary
GLRX3	ALAD	ordinary
KIF22	HLA-DPA1	ordinary
RAF1	AGK	ordinary
MMP16	MMP14	ordinary
EXO1	APEX1	ordinary
MARC2	SLC7A6	ordinary
GMPR	IMPDH1	ordinary
SHMT2	AMT	ordinary
TGFB1	CBFB	ordinary
MDM2	DYRK2	ordinary
RYR2	MYL12B	ordinary
NCAM1	KRAS	ordinary
BLM	AQR	ordinary
USP37	CCNA2	ordinary
CDC14B	MAPK6	ordinary
ADHFE1	ALDH5A1	ordinary
PIP4K2B	GNAO1	ordinary
GNAO1	ITPR2	ordinary
GRIK5	VDAC1	ordinary
PRKCB	GRIP2	ordinary
ABCC9	ATP1A1	ordinary
GNAL	PRKAR1A	ordinary
TAZ	HADHB	ordinary
KIF20A	HLA-DRB5	ordinary
CDC25B	CCNB2	ordinary
ACADVL	HADHA	ordinary
PIAS3	MITF	ordinary
D2HGDH	ADHFE1	ordinary
ITPR1	TMOD3	ordinary
DBF4	MCM7	ordinary
CDK1	CENPK	ordinary
CFI	C3	ordinary
IDH2	SLC25A11	ordinary
SYN1	SYT1	ordinary
ADAMTS14	COL3A1	ordinary
BAG3	HSPA1A	ordinary
FBP1	PFKFB2	ordinary
SLC41A1	MRS2	ordinary
ECT2	RHOD	ordinary
GCNT4	MUC20	ordinary
ARHGAP24	RAC3	ordinary
ABL1	RAD52	ordinary
GNG7	DGKQ	ordinary
NAGLU	GUSB	ordinary
SLC4A2	ANO8	ordinary
KIF4A	HLA-DQA2	ordinary
KIF2C	HLA-DQB2	ordinary
PDE1C	AMPD3	ordinary
MMP11	MMP1	ordinary
ACO2	IDH3A	ordinary
MPC1	PC	ordinary
AK3	NME4	ordinary
EME1	EXO1	ordinary
PPP1R12A	MYH11	ordinary
KLK5	KLK8	ordinary
ORC6	POLE3	ordinary
CA5B	PCCA	ordinary
UBE2T	RPA2	ordinary
CDC45	POLE4	ordinary
CDC7	MCM4	ordinary
TECR	CERS4	ordinary
KIT	LRRFIP1	ordinary
TNFRSF10D	TNFRSF10C	ordinary
IVD	MCCC2	ordinary
GLUL	CTPS2	ordinary
PRKG1	MRVI1	ordinary
BTD	SLC5A6	ordinary
GUCY1A3	PRKG1	ordinary
PDK4	DLD	ordinary
RCC1	RAN	ordinary
AR	H3F3A	ordinary
PNPLA7	GDPD5	ordinary
CAB39L	PRKAA1	ordinary
PRKACB	GFRA1	ordinary
RAP1GAP	RAP1B	ordinary
UBXN7	COMMD2	ordinary
SUCLG2	SDHC	ordinary
FGD4	RHOQ	ordinary
LRIG1	EGFR	ordinary
ACAT1	PCCB	ordinary
GPT2	ALDH18A1	ordinary
ACSM3	ACADS	ordinary
DOLK	DPM2	ordinary
HNF1A	HNF4G	ordinary
KL	FGFR1OP2	ordinary
ADAMTS2	COL1A2	ordinary
SLC25A4	ATP6V0B	ordinary
USP18	MX1	ordinary
XYLT2	SDC2	ordinary
LEPR	STAT3	ordinary
DCUN1D2	CUL4A	ordinary

## Sheet: HNSC
gene1	gene2	type
SQLE	LSS	critical
SP1	FDFT1	critical
EIF2AK3	EIF2S1	critical
HACL1	ALDH3A2	critical
ITGA4	ITGAL	critical
XPO1	MAPK6	critical
RPS6KA5	ATF1	critical
ITGAL	ITGA4	critical
SMAD4	CDKN2B	critical
SMAD7	KEAP1	critical
SMAD2	JUNB	critical
SMAD3	BCL2L11	critical
ABCB8	FLVCR1	critical
FOXM1	CENPF	critical
COL18A1	MMP13	critical
HMGB1	DFFB	critical
PTP4A2	RABGGTA	critical
SLC31A1	ATP7B	critical
SNW1	SMAD7	critical
ACO1	IDH1	critical
NSDHL	HSD17B7	critical
FDFT1	SQLE	critical
FDX1	FDXR	critical
GPCPD1	ETNK2	critical
UBE2D1	SMAD9	critical
TJP1	GJA1	critical
PCBD1	QDPR	critical
NAGLU	GUSB	critical
CPLX1	GAD1	critical
CYP7B1	HSD3B7	critical
KMT5A	PHF8	critical
HMGCR	MVK	critical
LZTFL1	ARL6	critical
IFNGR2	IFNGR1	critical
ACADM	DECR1	critical
PPARGC1B	ATP5B	critical
SLC19A2	TPK1	critical
CHEK1	WEE1	critical
DENND3	RAB12	critical
ALAD	HMBS	critical
GALT	GALE	critical
HMGCS1	HMGCR	critical
SRM	DHPS	critical
SORD	XYLB	critical
IL12RB1	IL12RB2	critical
AGPAT5	PRELID3A	critical
FOXO3	SOD2	critical
ITGAV	SHB	critical
LPGAT1	PLA2G4F	critical
PIGB	PIGF	critical
PIGF	PIGT	critical
PIGL	PIGW	critical
PIGO	PIGS	critical
PECR	PHYH	critical
FBP1	PFKFB4	critical
SH2B1	GHR	critical
VAPA	MOV10	critical
NKIRAS1	NFKBIB	critical
SC5D	DHCR7	critical
ITGB3	KDR	critical
PTS	SPR	critical
ABCG1	PLTP	critical
MPI	PMM1	critical
PRODH	PYCR2	critical
NCOR1	NR1D1	critical
SRD5A3	DOLK	critical
PHYH	HACL1	critical
SIAH1	SNCAIP	critical
AZIN2	AGMAT	critical
TRAF6	ITGB3BP	critical
CPOX	PPOX	critical
TAB2	S100B	critical
PMVK	MVD	critical
BAP1	HCFC1	critical
ATF2	MSH2	critical
KLK5	KLK8	critical
MOCS2	GPHN	critical
MOCS1	MOCS2	critical
DTX4	ZBP1	critical
ACAT2	HMGCS1	critical
EEF1A2	EEF1A1	critical
SLC27A2	AMACR	critical
AK3	NME4	critical
ITCH	TP73	critical
PLCG1	NGF	critical
MTMR9	IMPA1	critical
PCYT1A	CHPT1	critical
KITLG	KIT	critical
PTGES3	CBR1	critical
SLC2A5	KHK	critical
ECHS1	HADH	critical
MAN1C1	MGAT1	critical
RFK	FLAD1	critical
SARDH	GARS	critical
AKR1A1	CRYL1	critical
PPRC1	TFAM	critical
CFD	CFB	critical
ITGB3BP	MAPK8	critical
ALOX12	GPX4	critical
CRK	KIDINS220	critical
LIAS	MARS2	critical
PRKCZ	SPHK1	critical
SAE1	UBA2	critical
LSS	CYP51A1	critical
CTSD	COL18A1	critical
SH2D2A	AXL	critical
DAXX	MDM4	critical
ST8SIA2	NCAM1	critical
LIPT1	DHTKD1	critical
ALOX12B	ALOXE3	critical
PPCDC	COASY	critical
CYP27B1	CYP24A1	critical
BIRC3	RIPK2	critical
BIRC2	NOD1	critical
TFAP2A	TGFA	critical
SLC44A1	CHDH	critical
PKMYT1	CCNA1	critical
CPT2	ACADVL	critical
DOHH	EIF5A	critical
ACADS	ECHS1	critical
HSD3B7	PTGIS	critical
PGM2	DERA	critical
PGM3	UAP1	critical
FADS1	ELOVL5	critical
ZNF420	TP53AIP1	critical
TRIM21	DDX41	critical
DECR1	ECI1	critical
ELOVL6	HSD17B12	critical
CARNS1	CARNMT1	critical
HCFC1	TFB2M	critical
USP19	RNF123	critical
MYO7A	RDH11	critical
HMBS	UROS	critical
PAPPA	IGFBP5	critical
CDS2	PGS1	critical
UBE2D3	SMAD1	critical
MST1	MST1R	critical
WWOX	TFAP2C	critical
CTSK	MMP7	critical
ALG14	ALG1	critical
CAT	NUDT12	critical
CDC25B	CDK2	critical
COX10	COX15	critical
ENOPH1	ADI1	critical
ARSB	IDS	critical
PGS1	PTPMT1	critical
TFAP2C	PITX2	critical
ABCA12	APOD	critical
PROS1	F5	critical
ATP7A	ATOX1	critical
PKN1	PPP1R14A	critical
DHPS	EIF5A2	critical
ECSIT	MAP3K1	critical
SLC35D1	POMGNT2	critical
HSD17B12	SRD5A3	critical
RPS6KB1	RPS6	critical
ADSL	ATIC	critical
NAE1	UBA3	critical
RALGDS	RALB	critical
TSPO	FDX1	critical
TGFB1	ZFHX3	critical
ZBED1	CHD3	critical
AURKA	PHLDA1	critical
SLC6A2	MAOA	critical
TMEM55B	ING2	critical
RUNX2	LGALS3	critical
VCPKMT	VCP	critical
NMRAL1	ASL	critical
GPHN	MOCOS	critical
RWDD3	SAE1	critical
PPCS	PPCDC	critical
DCXR	SORD	critical
RENBP	NAGK	critical
NRF1	TFB1M	critical
MAN2B2	MANBA	critical
MAN2B1	MAN2B2	critical
PLK2	CENPJ	critical
GLRX3	ALAD	critical
P4HB	IL23A	critical
GNPNAT1	PGM3	critical
MGAT1	MAN2A1	critical
SULT2B1	BPNT1	critical
PGM2L1	PGK1	critical
TBK1	STAT6	critical
DEGS2	ACER3	critical
CTSB	COL15A1	critical
OMA1	OPA1	critical
GCLM	GSS	critical
GCLC	GGCT	critical
MON1A	RAB7B	critical
SGPL1	ALDH3B1	critical
RNF144A	UBE2L3	critical
APRT	LHPP	critical
GRB10	INSR	critical
GSTZ1	FAH	critical
UROS	UROD	critical
AMD1	SMS	critical
BRCC3	NLRP3	critical
GPAM	AGPAT5	critical
ZDHHC2	CKAP4	critical
CBL	TGFBR2	critical
SMS	SAT1	critical
ALDH9A1	BBOX1	critical
BPHL	VARS	critical
GLO1	HAGH	critical
MVK	PMVK	critical
F5	F8	critical
ERF	ETS2	critical
ABCA3	P2RY2	critical
RFT1	ALG3	critical
NGFR	SMPD2	critical
SGMS2	SMPD3	critical
ECI1	MECR	critical
HGS	STAM2	critical
NCK2	MAPK11	critical
SLC25A10	MDH1	critical
FGR	LRP8	critical
ALG8	ALG10	critical
CYB5R3	CYB5A	critical
ALG2	ALG11	critical
ALG1	ALG2	critical
FUK	FPGT	critical
USP7	FOXO4	critical
CSK	PDCD1	critical
BACE1	APP	critical
HIF1A	RORA	critical
USP8	LRIG1	critical
LCAT	CEL	critical
GMDS	TSTA3	critical
USP47	POLB	critical
TOMM40	PINK1	critical
RANBP10	RANBP9	critical
APIP	ENOPH1	critical
COQ2	COQ6	critical
DHODH	UMPS	critical
KIT	SH2B2	critical
MTF1	CSRP1	critical
PTPMT1	CRLS1	critical
MAP4K4	MAP3K5	critical
LGMN	TLR7	critical
HBEGF	GPNMB	critical
ALDH18A1	OAT	critical
ESRRA	PERM1	critical
PHGDH	PSAT1	critical
SPINT1	MST1	critical
PGLS	PGD	critical
DCPS	NT5C3B	critical
ENPP1	ACP5	critical
FDPS	GGPS1	critical
UBE2L6	SNCA	critical
ADI1	GOT1	critical
HYKK	PHYKPL	critical
RIMKLB	FOLH1	critical
HMOX1	BLVRB	critical
AASDHPPT	FASN	critical
NPM1	NOP2	critical
MSMO1	NSDHL	critical
PRPS2	HPRT1	critical
GLI3	PTCH1	critical
PLAT	PDGFD	critical
NGF	SHC2	critical
ABCC3	FABP6	critical
CBFB	SOCS3	ordinary
STAT3	ICAM1	ordinary
PPIB	COL4A1	ordinary
GNG10	BAG4	ordinary
INPP5B	ITPK1	ordinary
GPSM2	S1PR1	ordinary
DVL1	PLCB3	ordinary
IRAK4	PELI2	ordinary
TALDO1	GPI	ordinary
RAD50	POLK	ordinary
CDK11A	ODF2	ordinary
FGFR1OP	WASF3	ordinary
INPPL1	BIN1	ordinary
MMP2	SCUBE3	ordinary
EPHB1	EFNB3	ordinary
GNG12	LRRFIP1	ordinary
LCP2	RASGRP4	ordinary
NR1D1	NPAS2	ordinary
ARNTL	CRY1	ordinary
MTHFD1	ALDH1L1	ordinary
MAT2B	INMT	ordinary
RPS28	UTP14C	ordinary
GNGT2	DGKI	ordinary
DYNC2H1	GLI3	ordinary
TRPV2	TLN1	ordinary
VCL	MAPK1	ordinary
MBD3	UBTF	ordinary
ATG9B	PIK3C3	ordinary
PIK3C3	RUFY1	ordinary
EXOSC1	WDR46	ordinary
ARPC5	VAMP4	ordinary
VAMP7	CLINT1	ordinary
IRAK3	TLR2	ordinary
MYD88	INPP5K	ordinary
DDIT4	YWHAG	ordinary
TRPM6	CPNE7	ordinary
HIST1H2BC	HIST1H4H	ordinary
HSP90AB1	HBEGF	ordinary
FYN	PECAM1	ordinary
RPS27	RPS7	ordinary
LRRFIP1	NCKAP1	ordinary
CD28	CNTRL	ordinary
CALM1	ORAI2	ordinary
PSMB10	CD40	ordinary
BLMH	TAP1	ordinary
DNAJB1	HSPA1A	ordinary
HSPA8	AP1S3	ordinary
CACNA1A	PPFIA4	ordinary
NEDD4L	UBC	ordinary
PPIA	NFATC2	ordinary
HLA-E	FCGR3A	ordinary
PLCG2	INPP5B	ordinary
MAP3K11	ARAF	ordinary
YWHAB	FAM114A2	ordinary
CACNG4	TNNC1	ordinary
VDAC2	MICU1	ordinary
EIF5	EIF3J	ordinary
RPS3A	RPS14	ordinary
PIP4K2A	SH2D2A	ordinary
CAB39	PRKAB2	ordinary
PRKAB2	LAMTOR5	ordinary
MAP2K1	PAPD7	ordinary
PAFAH1B1	BICD2	ordinary
GTF2H3	POLR2J	ordinary
NUP153	FIP1L1	ordinary
PSMD4	OAZ3	ordinary
DHCR24	SREBF2	ordinary
CNDP2	GART	ordinary
B4GALT7	SDC2	ordinary
NEK6	NUP62	ordinary
TPR	WDR33	ordinary
ARF5	COPA	ordinary
ATP6V0C	ARL2BP	ordinary
AK8	GPR161	ordinary
COPS6	DTL	ordinary
HIST1H2AC	HIST1H4I	ordinary
NUP214	SNRPB	ordinary
REPS1	MYO10	ordinary
ARPC4	VAMP8	ordinary
ACTR5	DDB2	ordinary
COPS7A	SPSB2	ordinary
RHOB	PPP1R12B	ordinary
P2RX4	NEB	ordinary
SLC24A1	TRPM7	ordinary
PSMD13	TNFRSF12A	ordinary
MPHOSPH6	NOP58	ordinary
PSMD9	ANAPC5	ordinary
PSMC1	MAD2L1	ordinary
LNPEP	HLA-G	ordinary
ATP6V0A1	DTYMK	ordinary
JAK3	IL4R	ordinary
LRP5	FZD8	ordinary
DLG4	TPM1	ordinary
AKT2	GSK3A	ordinary
NUP50	XPO1	ordinary
CYB5R1	FTH1	ordinary
ATP1A1	KCNAB1	ordinary
PIK3CG	SGIP1	ordinary
EPN2	ITSN2	ordinary
RIOK3	PNO1	ordinary
KAT5	FANCA	ordinary
LAT2	VAV1	ordinary
ZMYM2	ABI2	ordinary
RIPK3	TICAM1	ordinary
MCOLN3	SORBS1	ordinary
FAM20C	LGALS1	ordinary
APH1A	EPHB6	ordinary
BLM	AQR	ordinary
VAV1	INPP5D	ordinary
PI4K2A	SH3GL1	ordinary
AP2S1	GRIP2	ordinary
CACNB3	CACNB1	ordinary
STXBP1	DNAJC5	ordinary
INPP5D	ARRB1	ordinary
PIK3C2A	PIKFYVE	ordinary
EXOSC6	NOP56	ordinary
IRS1	FGFR1OP	ordinary
HGF	INPP5J	ordinary
RAP1A	PTK2	ordinary
WDR35	PDE8B	ordinary
IQGAP1	MAP2K1	ordinary
MCOLN2	TNNI1	ordinary
SBF2	PIP4K2B	ordinary
COPS8	KLHL5	ordinary
FBXL18	FBXL7	ordinary
EXOSC8	UTP6	ordinary
PSMA1	LTB	ordinary
CUX1	BRK1	ordinary
AKT1	RPTOR	ordinary
POLR1C	HIST1H2AE	ordinary
NECAP1	M6PR	ordinary
PEX2	UBE2D3	ordinary
SPCS2	SEC61G	ordinary
ITSN1	ARPC4	ordinary
FGFR2	WASF2	ordinary
DVL2	HGS	ordinary
CLTA	BLOC1S1	ordinary
MSRB2	MAT2A	ordinary
CCAR2	SERPINH1	ordinary
NUP133	IPO8	ordinary
FGF2	FRS2	ordinary
CSNK1D	GOSR2	ordinary
RANBP2	KPNA5	ordinary
DCTN4	PTGES3	ordinary
BAG4	HSPA12B	ordinary
RMI1	FAAP24	ordinary
POLR2E	H2AFX	ordinary
PAFAH1B2	DYNC1I2	ordinary
GNG5	ITPR3	ordinary
CD247	BTK	ordinary
GBF1	COPE	ordinary
CALM3	IQGAP2	ordinary
NUP210	SYMPK	ordinary
PLD2	PITPNM3	ordinary
PITPNM2	PLA2R1	ordinary
CYCS	CASP9	ordinary
PAPSS2	SLC35B2	ordinary
SLC35B3	HS2ST1	ordinary
IL1RAP	BCR	ordinary
SEH1L	SNRPD1	ordinary
FCGR1A	FGF7	ordinary
SLC2A8	ARPC1B	ordinary
ADCY9	PDE4A	ordinary
AAAS	SNRPF	ordinary
ABCB10	HMOX2	ordinary
CDC37	ZMYM2	ordinary
NECAP2	VAMP3	ordinary
VAMP4	ARPC5	ordinary
BAG1	HSPA12A	ordinary
TRIM24	TEC	ordinary
PPP3R1	YWHAQ	ordinary
EIF1AX	RPL6	ordinary
SYT11	PLEKHA2	ordinary
CCNH	TCF3	ordinary
SNX18	ADRB2	ordinary
NUP188	ALYREF	ordinary
COPS3	LRR1	ordinary
PLCD3	ITPKC	ordinary
AGPAT4	CDS1	ordinary
LPIN3	DGAT2	ordinary
SLC6A6	BEST1	ordinary
SLC12A4	SLC4A3	ordinary
PSMA7	TPP2	ordinary
CACNA1C	SPARC	ordinary
RAB8A	EXOC7	ordinary
EFNB3	LIMK1	ordinary
ATM	ERCC3	ordinary
MNAT1	POLR2G	ordinary
IDS	HEXB	ordinary
HEXB	NEU1	ordinary
TSC1	MTOR	ordinary
RRAGC	SLC7A7	ordinary
PDPK1	RPS6KA3	ordinary
SLC25A37	ISCU	ordinary
FECH	ABCB10	ordinary
MAP2K4	MAPK9	ordinary
ASL	NOS1	ordinary
CALM2	IQGAP3	ordinary
DIAPH2	KNTC1	ordinary
HDAC8	NAA38	ordinary
RABGGTA	RAB24	ordinary
ACTR1B	DCTN2	ordinary
DCTN1	HSP90AB1	ordinary
ELL	GTF2H5	ordinary
POLR2B	ATR	ordinary
APBA1	UNC13B	ordinary
POM121	GEMIN5	ordinary
SPCS3	RPN2	ordinary
SUPT4H1	GTF2B	ordinary
TYROBP	LAT2	ordinary
PSMD12	HNRNPD	ordinary
TPP2	TAP2	ordinary
FXYD6	KCNQ1	ordinary
ROCK2	PPP1CB	ordinary
RRAGA	CALM3	ordinary
WNT5A	FZD2	ordinary
ARPC1A	LDLRAP1	ordinary
VAMP3	ARPC2	ordinary
ACTR2	VAMP7	ordinary
GART	PFAS	ordinary
NUP54	HNRNPC	ordinary
HLA-DRB1	CD3D	ordinary
HDAC6	MID1IP1	ordinary
NUP58	KPNA3	ordinary
COPS7B	CCNF	ordinary
ASPH	CPNE3	ordinary
PSME2	EGLN1	ordinary
ATG101	DYNLL2	ordinary
MTM1	PIP4K2C	ordinary
PI4K2B	REPS2	ordinary
ARF3	COPB2	ordinary
PHB	KSR1	ordinary
NRAS	KIAA1549	ordinary
PSMA3	CDC26	ordinary
LDLR	TFRC	ordinary
HRAS	MACF1	ordinary
FGFR1	GAB2	ordinary
LAMTOR4	MAF1	ordinary
FXYD3	SCN1B	ordinary
SCN4B	ATP1B3	ordinary
PSMA5	ANAPC15	ordinary
MTMR2	PITPNB	ordinary
NEDD8	BIRC5	ordinary
AGPAT2	PLA2G2A	ordinary
LPIN2	PRKCB	ordinary
LAMTOR5	EEF1E1	ordinary
EXOSC9	UTP3	ordinary
UBB	RFC5	ordinary
CSNK1A1	APC	ordinary
FASN	MORC2	ordinary
ITPKB	OCRL	ordinary
OCRL	MTMR1	ordinary
PRKAB1	TBC1D1	ordinary
ACSL4	AGPAT3	ordinary
TTF1	TAF1A	ordinary
OPLAH	SLC25A22	ordinary
FGF13	AHCYL2	ordinary
RAC1	MYH11	ordinary
BARD1	FANCL	ordinary
ARL2BP	ADCY3	ordinary
IFT122	PDE7B	ordinary
CARM1	TRIB3	ordinary
SLC4A2	SLC12A7	ordinary
ORAI1	MYL6	ordinary
INPP5K	EPN2	ordinary
UBE2N	PELI1	ordinary
CARD11	IKBKG	ordinary
RRP1	TBL3	ordinary
PPARA	CPT1A	ordinary
POM121C	KPNA1	ordinary
TOMM20	ATP5A1	ordinary
INO80	COPS2	ordinary
DDB2	XPC	ordinary
SUPT5H	SNAPC4	ordinary
ITK	ITPR1	ordinary
PRKCE	SHC1	ordinary
PLD4	PITPNM2	ordinary
SEPT2	PLK4	ordinary
MAP2K2	AP3B1	ordinary
MARC1	IARS	ordinary
DOLPP1	DPM1	ordinary
GNAZ	PRKACA	ordinary
KLRD1	ITK	ordinary
P2RX7	ANXA1	ordinary
PSMC5	CKS1B	ordinary
FGFR3	FGFR2	ordinary
ARPC3	FZD4	ordinary
AKT3	FOXO3	ordinary
ATP6AP1	SLC25A6	ordinary
ORAI2	TMOD2	ordinary
XRN2	WDR36	ordinary
SLC39A3	S100A7A	ordinary
GNB4	CACNA1C	ordinary
PIK3R4	FIG4	ordinary
PIGW	ACSL3	ordinary
CACFD1	MYL5	ordinary
IRS2	WASF1	ordinary
HLA-DQA1	LCP2	ordinary
CACNA2D4	DMD	ordinary
MTMR14	PIGC	ordinary
PI4KA	PIK3C2A	ordinary
SEC24D	SEC31A	ordinary
ATP2B4	PPP3CA	ordinary
SKIV2L2	UTP15	ordinary
ANO9	SLC26A6	ordinary
HERC2	KDM4A	ordinary
CDKN1A	ORC6	ordinary
PSMB5	LTBR	ordinary
PSMF1	BUB1B	ordinary
LTBR	TRAF3	ordinary
SLC4A7	NCOA2	ordinary
PDZD11	PANK2	ordinary
RAD51C	CDK4	ordinary
HIST2H2BE	EYA4	ordinary
BTK	WAS	ordinary
PPP2R1A	SPRY2	ordinary
KRAS	AGTRAP	ordinary
BAG2	HSPA2	ordinary
NUPL2	CPSF1	ordinary
BCR	BAIAP2	ordinary
RPS13	RPS9	ordinary
AP2B1	ROR1	ordinary
GSS	GSTM3	ordinary
SLC35B2	CHST1	ordinary
ARFGAP2	YKT6	ordinary
CCT2	TTC8	ordinary
SLC38A9	RARS	ordinary
SPTBN5	TMED3	ordinary
COPS2	FEM1B	ordinary
ARRB2	PTPN13	ordinary
SMO	GLI1	ordinary
CATSPER2	TPM4	ordinary
PIK3R5	ARRB2	ordinary
IGF2R	PLIN3	ordinary
PTEN	DOCK1	ordinary
LAMTOR2	RPS6KB1	ordinary
INO80C	RBX1	ordinary
LPCAT2	STARD7	ordinary
PLD1	DDHD1	ordinary
OSTM1	ANO1	ordinary
AASS	GLUD1	ordinary
BCAT2	GPT2	ordinary
CLCN5	CLCN2	ordinary
DENND1C	RAB8B	ordinary
CHM	RAB22A	ordinary
PEMT	STARD10	ordinary
ADCY5	HCN3	ordinary
GTF2H5	POLR2L	ordinary
B4GALT3	FMOD	ordinary
ARHGEF7	PAK1	ordinary
EXOSC10	WDR75	ordinary
PPP2R5C	MARK3	ordinary
FZD1	CSNK1A1	ordinary
SYK	PIK3CD	ordinary
RABGGTB	RAB17	ordinary
NUP98	KPNB1	ordinary
IRAK2	MAP2K6	ordinary
CD3G	CD28	ordinary
PSMB3	NUMB	ordinary
CDIPT	PIGQ	ordinary
RHEB	EIF4EBP1	ordinary
CTH	SERINC1	ordinary
PIP4K2B	SNX9	ordinary
PLCB3	DGKD	ordinary
PLCB1	DGKE	ordinary
DEGS1	PPM1L	ordinary
GGT1	DPEP2	ordinary
TLR2	TIRAP	ordinary
HLA-DQB1	CD3E	ordinary
TGOLN2	INPP4A	ordinary
INPP4B	PLEKHA6	ordinary
NEK9	TPR	ordinary
ARHGAP15	RHOH	ordinary
AP2A1	FZD5	ordinary
PRKAG1	LAMTOR3	ordinary
GNAO1	ITPR2	ordinary
GNG2	RASGRP3	ordinary
GNAI2	CD209	ordinary
TRPV4	CPLX1	ordinary
SLC39A7	MT1F	ordinary
ADCY7	IQGAP1	ordinary
RAPGEF4	KCNJ11	ordinary
HLA-DPB1	CD247	ordinary
PAFAH1B3	DYNC1H1	ordinary
CAMK2D	MYO6	ordinary
IKBKG	CYLD	ordinary
RAB18	ACTR10	ordinary
EXOSC4	RRP7A	ordinary
RNF181	BCL10	ordinary
RB1CC1	ATG14	ordinary
CD3D	ZAP70	ordinary
RPS19BP1	SIRT1	ordinary
CEPT1	PTDSS2	ordinary
PLBD1	LPCAT3	ordinary
LIN7B	PPFIA3	ordinary
CHMP5	CHMP2B	ordinary
CHMP3	MAP1LC3A	ordinary
PIP5K1C	PLCE1	ordinary
SYNJ1	SBF2	ordinary
PMPCB	TIMM21	ordinary
ASB7	CUL5	ordinary
CPSF6	CYFIP2	ordinary
EFNB2	PAK2	ordinary
B2M	CD86	ordinary
FGFR1OP2	ABI1	ordinary
SLC25A6	MB21D1	ordinary
COPS5	COMMD5	ordinary
PSME4	ANAPC1	ordinary
TAGAP	RAC2	ordinary
PIP5K1A	PIK3CA	ordinary
PSMC2	CDC23	ordinary
ERLIN2	GAB1	ordinary
PSME3	NPEPPS	ordinary
PSMC6	SKP2	ordinary
KLHL12	DVL3	ordinary
GRAP2	RASGRP1	ordinary
PORCN	WNT2B	ordinary
CYP4F3	CYP4F11	ordinary
IER3	PPP2R5B	ordinary
RPS15A	FBL	ordinary
CA2	ATP6V0E2	ordinary
GCH1	MTHFD1	ordinary
HDAC2	BRD7	ordinary
EP300	GADD45A	ordinary
NOS3	GUCY1A3	ordinary
COMMD1	NEDD8	ordinary
CSF2RA	CSF2RB	ordinary
PIK3R3	FNBP1L	ordinary
AP2A2	ROR2	ordinary
FNBP1	SYT1	ordinary
NAA30	ARFRP1	ordinary
VPS4A	CHMP3	ordinary
PSMD8	RNF146	ordinary
PPP2R5E	YWHAB	ordinary
TBC1D20	RAB1B	ordinary
SPRED1	RASAL2	ordinary
MTA3	TAF1B	ordinary
SLC6A11	CLCA4	ordinary
APBB1IP	SYK	ordinary
PGP	PLD2	ordinary
NCSTN	DTX4	ordinary
FURIN	MMP11	ordinary
MAOA	GPX2	ordinary
PRDX5	TXN2	ordinary
SLC25A5	ATP6V1C1	ordinary
CLNS1A	SNRPE	ordinary
STON1	ARPC1A	ordinary
SLC25A13	ASNS	ordinary
GLUD1	OGDH	ordinary
CDC42	KIF2C	ordinary
NUP43	CPSF3	ordinary
CASP14	PPL	ordinary
TP53	PIDD1	ordinary
MBTPS2	CREB3L2	ordinary
SREBF2	ELOVL6	ordinary
RBBP8	FANCC	ordinary
ACSL3	SPTLC1	ordinary
FZD5	DVL2	ordinary
COMMD4	UBE2M	ordinary
STK11	PRKAA2	ordinary
TRPM7	SLC24A1	ordinary
CDC16	IL6	ordinary
CNOT1	EIF4G1	ordinary
NRP1	DPYSL2	ordinary
CDK5	LMNB1	ordinary
ANKRD27	RAB21	ordinary
MBOAT2	PEMT	ordinary
RARRES3	PNPLA7	ordinary
ATG13	AMBRA1	ordinary
DYNLL1	NR3C2	ordinary
PLA2G4A	PTGS2	ordinary
ERCC2	POLR2E	ordinary
AXL	FGFR3	ordinary
ST13	HSPA9	ordinary
PSMB6	ANAPC11	ordinary
PSMD7	GTSE1	ordinary
TNKS2	PTEN	ordinary
ERCC1	RFC4	ordinary
PMPCA	PHB	ordinary
CDKN1B	MCM6	ordinary
PIK3CB	SNX18	ordinary
CDK7	GTF2F2	ordinary
RPS11	DDX49	ordinary
DCTD	DPH6	ordinary
SUMO1	CDCA8	ordinary
AGFG1	ACTR3	ordinary
ARL2	ATP6V1F	ordinary
PSMB8	TNFSF13B	ordinary
SLC8A1	TRPV2	ordinary
CHRNA1	VDAC3	ordinary
GNAL	RAPGEF3	ordinary
PDE3A	GMPR	ordinary
MAPK1	GORASP2	ordinary
SAP30	H2AFZ	ordinary
BAG5	HSPA4L	ordinary
PIP4K2C	GNG12	ordinary
LAMTOR1	SLC3A2	ordinary
GPS1	COMMD4	ordinary
ARF1	KDELR1	ordinary
PSME1	UBE2C	ordinary
DCUN1D2	CUL4A	ordinary
HK2	GYS1	ordinary
CHD9	GLIPR1	ordinary
CNIH1	SAR1B	ordinary
SEC24C	SEC23IP	ordinary
B3GALT6	SDC1	ordinary
POLR2J	EPAS1	ordinary
PSMB1	OAZ1	ordinary
PPP2CA	FOXM1	ordinary
RPS6KA3	CREB1	ordinary
IKBKB	NFKBIE	ordinary
CNTRL	SOS1	ordinary
PSMA2	ANAPC16	ordinary
MTMR1	PPP2R5A	ordinary
PAK1	CTNNA1	ordinary
FRS2	CPSF6	ordinary
RPS24	NOC4L	ordinary
PSMD1	CUL3	ordinary
PRKAA1	LAMTOR2	ordinary
CASP3	STK4	ordinary
SAV1	LATS1	ordinary
PLA2G4D	MBOAT7	ordinary
HAGH	BSG	ordinary
SLC8B1	P2RX4	ordinary
NCK1	MAPK14	ordinary
PIK3R6	FNBP1	ordinary
NCOA2	ACOX1	ordinary
RPS5	SNU13	ordinary
PLXNA4	DPYSL3	ordinary
NUP35	SNRPG	ordinary
RPS16	IMP3	ordinary
GNAQ	DGKH	ordinary
CHD3	EP300	ordinary
ATP6V1F	NME2	ordinary
PRMT5	GEMIN2	ordinary
MKKS	BBS2	ordinary
D2HGDH	ADHFE1	ordinary
DLST	SUCLG1	ordinary
AMT	MTHFD2	ordinary
SLC23A2	CAMK2G	ordinary
NEK7	NDC1	ordinary
METAP1	MAT2B	ordinary
HLCS	ACACA	ordinary
MSRB1	LARS	ordinary
SOS1	PIK3R1	ordinary
TNFSF12	BIRC2	ordinary
GNB2	CUX1	ordinary
CTNNB1	AXIN2	ordinary
ATG12	ATG10	ordinary
UBE2M	FBXW11	ordinary
TBL1X	PEX11A	ordinary
DNM3	AP2B1	ordinary
MLST8	AKT1S1	ordinary
CNOT11	EIF4A3	ordinary
DGKE	LPIN2	ordinary
HS2ST1	IMPAD1	ordinary
TLR4	SNAP23	ordinary
MAP3K7	CHUK	ordinary
EME2	BRIP1	ordinary
SH3KBP1	PIK3AP1	ordinary
USP1	DCLRE1B	ordinary
RPS27L	DCAF13	ordinary
ABAT	ALDH5A1	ordinary
B3GLCT	ADAMTS12	ordinary
OSBPL8	SACM1L	ordinary
TFDP2	CDT1	ordinary
EPHB3	LIMK2	ordinary
ACSL5	ZDHHC21	ordinary
VTA1	CHMP4C	ordinary
CHMP6	GABARAP	ordinary
DNAJC6	SNX2	ordinary
PDGFRA	FGF2	ordinary
PIK3AP1	TRIM24	ordinary
CYB5RL	CP	ordinary
STAM	PIP5K1A	ordinary
DAB2	CD4	ordinary
ATP6V1H	NME1	ordinary
C1D	WDR43	ordinary
GPAT3	PLA2G4A	ordinary
PSMD5	CDC27	ordinary
PLA2G4E	MBOAT1	ordinary
ADRA2A	GNG7	ordinary
CLIC2	ANXA2	ordinary
SLC9A1	AKAP1	ordinary
LCK	TYROBP	ordinary
EXOSC7	IMP4	ordinary
TNFAIP3	TRAF1	ordinary
TAB1	MAP2K7	ordinary
SLC35A1	ST6GALNAC6	ordinary
ST3GAL3	LUM	ordinary
SRSF10	SRSF1	ordinary
PITPNM3	PI4K2B	ordinary
RNF8	CHEK2	ordinary
DCUN1D5	UBE2F	ordinary
PPFIA3	ACHE	ordinary
ADCY1	PDE4D	ordinary
ERBB2	PLXNB1	ordinary
SLC1A3	SLC25A12	ordinary
SLC13A3	GRIN2D	ordinary
GUCY1A3	PRKG1	ordinary
EGFR	PXN	ordinary
GPSM3	C3AR1	ordinary
CASP6	SATB1	ordinary
ARAF	ATG7	ordinary
COASY	ACSL4	ordinary
UBQLN2	AAK1	ordinary
CLTC	AP1G1	ordinary
CNOT8	PAIP1	ordinary
EHMT2	TBP	ordinary
XRN1	LSM4	ordinary
CCND1	E2F4	ordinary
PIK3R2	TRIP10	ordinary
ADRA2C	GNG11	ordinary
KPNA1	PSIP1	ordinary
NUP205	HDAC4	ordinary
MTA2	BRPF1	ordinary
IL6R	PTPN11	ordinary
MAPK14	CBX8	ordinary
GNA11	DAGLA	ordinary
SLC6A9	ANO8	ordinary
CLCN6	ARHGEF9	ordinary
TNFSF13B	BIRC3	ordinary
WRN	REV3L	ordinary
THEM4	CPT2	ordinary
MYO9A	RHOA	ordinary
TIRAP	IRAK2	ordinary
CA12	BST1	ordinary
AK2	SLC25A5	ordinary
GUK1	TTC21B	ordinary
CDKN1C	E2F5	ordinary
CREBBP	PPARA	ordinary
SLC20A2	SLC9A9	ordinary
DLG1	ATP2C1	ordinary
VAMP8	PUM1	ordinary
EVC	SUFU	ordinary
NOL12	HEATR1	ordinary
SPTLC1	KDSR	ordinary
ATAT1	SLC33A1	ordinary
EPHB6	TIAM1	ordinary
PSPH	ORMDL1	ordinary
CYLD	SHARPIN	ordinary
CTPS2	LRRC49	ordinary
SLC7A11	GCLM	ordinary
ATP6V0B	GUK1	ordinary
PFKP	ALDOA	ordinary
ADCY4	PDE1B	ordinary
LRP6	FZD6	ordinary
SRI	ATP2B4	ordinary
IPPK	IP6K2	ordinary
IP6K2	IP6K1	ordinary
SLC5A6	HLCS	ordinary
RPS8	RRP9	ordinary
GATAD2A	BRD1	ordinary
RDH10	HSD17B1	ordinary
TSC2	MLST8	ordinary
RAB13	MYO1C	ordinary
JAK2	ZC3HAV1	ordinary
GPSM1	GPER1	ordinary
TRPC1	RASGRF2	ordinary
NUP93	CPSF4	ordinary
GSK3B	PLXNA1	ordinary
APH1B	EPHB2	ordinary
MAML2	HEY1	ordinary
PLA2G6	CYP2U1	ordinary
PTGS2	PTGS1	ordinary
RPA2	HSPA1L	ordinary
PSMC3	TNKS2	ordinary
PSMC4	SPOP	ordinary
BRAP	BRAF	ordinary
ABHD6	AQP9	ordinary
PIK3CA	PICALM	ordinary
POLD2	RAD51	ordinary
UBE2V1	TAB2	ordinary
SARM1	TLR4	ordinary
IL3RA	STAT5B	ordinary
DGKQ	LPIN3	ordinary
PLCB2	RASGRP2	ordinary
PMM2	GMPPB	ordinary
GMPPA	DPM3	ordinary
MSRB3	QARS	ordinary
CD79A	CBLB	ordinary
PLCD1	PRKCD	ordinary
PRKCA	GNB5	ordinary
PPP2R1B	RBL2	ordinary
PSMD10	ANAPC10	ordinary
NCL	BMS1	ordinary
TCP1	BBS7	ordinary
SLC38A2	SLC38A1	ordinary
PFAS	RIMKLB	ordinary
EPN1	CLTB	ordinary
SOAT1	AASDHPPT	ordinary
UBA52	POLD2	ordinary
GABARAPL1	ATG3	ordinary
SLC6A14	TTYH3	ordinary
PHC1	HNRNPK	ordinary
PRKCB	STXBP3	ordinary
SAP30BP	H3F3B	ordinary
HSPA9	HSPD1	ordinary
FAM120B	FABP4	ordinary
PNPLA8	MBOAT2	ordinary
TRPC4AP	ITGB5	ordinary
PLA2G4F	PLBD1	ordinary
MBOAT1	PNPLA8	ordinary
ALOX5AP	LTA4H	ordinary
SPTBN1	ARCN1	ordinary
SOD2	PRDX5	ordinary
STAT5B	BRWD1	ordinary
ALDH1A1	CRABP2	ordinary
NDST1	SDC3	ordinary
AGO3	RUNX1	ordinary
GCAT	SHMT2	ordinary
VPS72	HIST3H2A	ordinary
GRB2	CSK	ordinary
RAB43	STX6	ordinary
CDKN2C	CCND2	ordinary
TMED5	WNT2	ordinary
ANO6	SLC6A6	ordinary
MCOLN1	ITGA1	ordinary
CCT4	BBIP1	ordinary
FKBP1A	NFATC1	ordinary
ARF4	KDELR2	ordinary
CAMKMT	CALM2	ordinary
CCNA1	ORC1	ordinary
CCT3	BBS1	ordinary
FZR1	MCM5	ordinary
FKBP1B	ACTG2	ordinary
BTRC	PRLR	ordinary
HRASLS	GDPD1	ordinary
CHUK	REL	ordinary
INPP5E	PLEKHA8	ordinary
E2F5	MYBL2	ordinary
WDR19	PRKAR1A	ordinary
ADSS	ADSL	ordinary
CNOT6L	EIF4B	ordinary
SEPT7	CDC42EP3	ordinary
JUN	IGFBP7	ordinary
HVCN1	DUOX1	ordinary
HDAC1	MEAF6	ordinary
ZFYVE9	SMAD3	ordinary
NUP160	CPSF2	ordinary
EPHA3	EFNA1	ordinary
RRAGB	MARS	ordinary
EXOSC3	NOL6	ordinary
SSU72	NABP2	ordinary
OSBP	SGMS1	ordinary
NBN	TCEA1	ordinary
RPA1	HSPH1	ordinary
NFYC	HSPA5	ordinary
IDI1	FDPS	ordinary
INO80E	COPS8	ordinary
MVD	IDI1	ordinary
SPRED2	SYNGAP1	ordinary
AGTPBP1	TPGS2	ordinary
CFLAR	TNFSF10	ordinary
TRADD	RIPK3	ordinary
SCMH1	CBX4	ordinary
CTPS1	TTLL4	ordinary
MEF2D	PPARGC1A	ordinary
KDM4A	HERC2	ordinary
BPNT1	NSF	ordinary
RAB3A	SLC1A1	ordinary
ERCC3	POLR2C	ordinary
CDA	UPP1	ordinary
FZD7	PARD6A	ordinary
FAS	RIPK1	ordinary
FTSJ3	NOL11	ordinary
METTL3	POLR2H	ordinary
GFPT1	GNPNAT1	ordinary
ATR	MCM2	ordinary
BHLHE41	PER2	ordinary
ARHGEF17	RHOBTB2	ordinary
SLC36A4	WARS	ordinary
RNF40	UBE2B	ordinary
EDC3	LSM5	ordinary
NIP7	UTP4	ordinary
GPAT4	LPCAT1	ordinary
DHFR	TYMS	ordinary
NMT2	SLC25A16	ordinary
NUP88	GEMIN4	ordinary
HSD17B7	EBP	ordinary
FANCL	UBE2T	ordinary
CD4	PIP5K1C	ordinary
FAM20A	TMEM132A	ordinary
C9orf3	SLC7A6	ordinary
HSP90AA1	GUCY1B3	ordinary
MTRR	FPGS	ordinary
CRLS1	TAZ	ordinary
DNAJC7	HSPA4	ordinary
INO80D	COPS6	ordinary
GNA15	DAGLB	ordinary
BMPR2	BMPR1B	ordinary
GHR	IRS2	ordinary
SLC13A5	ACO1	ordinary
WIPI2	GABARAPL2	ordinary
POLE4	EXO1	ordinary
CDK11B	CEP131	ordinary
CSNK1G2	GSK3B	ordinary
FRAT2	AMER1	ordinary
APC	CTNNB1	ordinary
RANGRF	CAMK2D	ordinary
PRKG2	KCNMB1	ordinary
ATP2B1	ATP2A2	ordinary
GFPT2	BCAT1	ordinary
XRCC1	POLD3	ordinary
GTF2H1	NCBP1	ordinary
NME1	ATP6V0B	ordinary
DGKZ	LPIN1	ordinary
ATP1B1	ABCC9	ordinary
RXRA	PLIN2	ordinary
PTPN1	STAT2	ordinary
SEC16A	COL7A1	ordinary
RIN1	GDI2	ordinary
SBF1	PIGP	ordinary
UBE2V2	SUMO2	ordinary
USP21	RNF31	ordinary
AAK1	TF	ordinary
SEC11A	RPS17	ordinary
RAB7A	CAPZA2	ordinary
SLC39A6	C1QBP	ordinary
RELB	NFKB2	ordinary
HSBP1	MRPL18	ordinary
RPS27A	RFC2	ordinary
EP400	UBN1	ordinary
HBS1L	PPAT	ordinary
GMPR2	IMPDH2	ordinary
HEXA	CTSA	ordinary
ALG10	STT3A	ordinary
SEL1L	RPS27A	ordinary
NME2	ADCY4	ordinary
RUNX1	NR4A3	ordinary
LIG3	ZNF830	ordinary
SRC	QKI	ordinary
CCND2	E2F3	ordinary
DOLK	DPAGT1	ordinary
LIN7A	STXBP1	ordinary
PRKAG2	RHEB	ordinary
ZCCHC11	EIF4A1	ordinary
MAPK6	NCOA3	ordinary
ATP6V1D	PNP	ordinary
TBC1D1	RAB13	ordinary
PLD3	LIPH	ordinary
P3H3	COL6A2	ordinary
SLC12A6	ATP12A	ordinary
SLC22A5	SLC9A7	ordinary
LPCAT4	PLD6	ordinary
TRAPPC11	CHML	ordinary
ALOX5	ALOX12	ordinary
MAPK11	CBX2	ordinary
MAPKAPK2	ZFP36	ordinary
SSB	POLR2K	ordinary
XYLB	PPP2R5D	ordinary
TKT	PFKP	ordinary
ADAMTS3	COL27A1	ordinary
PLCH2	DGKQ	ordinary
PSMB7	ANAPC2	ordinary
NFS1	MOCS3	ordinary
GLE1	NUP188	ordinary
CD86	FCGR2A	ordinary
SUZ12	H3F3A	ordinary
ADAM17	NRG1	ordinary
GOLGA2	GORASP1	ordinary
LHPP	TSPAN7	ordinary
PYGB	UGP2	ordinary
HSPH1	HSPA1B	ordinary
NFRKB	COPS4	ordinary
CHD4	KAT6A	ordinary
RFC1	NBN	ordinary
PSMA6	BUB3	ordinary
CTSA	SLC17A5	ordinary
SIRT1	CLOCK	ordinary
BRAF	AGK	ordinary
PLXNA2	DPYSL4	ordinary
CD274	HLA-DRB1	ordinary
PSENEN	EPHB4	ordinary
DDX21	TEX10	ordinary
PRKACB	GFRA1	ordinary
RBBP4	ING5	ordinary
PPP2R5D	AXIN1	ordinary
CHAC1	CNDP2	ordinary
AGBL5	TTLL1	ordinary
DCP2	LSM7	ordinary
AGPAT1	PLA2G4D	ordinary
DENND4C	CHM	ordinary
HIP1R	SYT8	ordinary
HSCB	GLRX5	ordinary
GSR	CHAC2	ordinary
MCFD2	SEC24A	ordinary
MAPK9	ATF2	ordinary
SLC12A7	SLC4A2	ordinary
ATP6V1B2	SLC25A4	ordinary
SLC4A8	CA2	ordinary
PYGL	PGM1	ordinary
LPCAT3	PTDSS1	ordinary
IL1R1	IRAK1	ordinary
KDM5B	CDKN1A	ordinary
SLC4A3	SLC12A4	ordinary
SLC6A8	CKB	ordinary
SEC23A	TMED2	ordinary
IDH3B	SLC25A11	ordinary
GUCY1A2	PDE3A	ordinary
GNAI3	PRKAR2A	ordinary
OTUD7B	TAB3	ordinary
ARHGEF9	AGT	ordinary
MAPK7	MEF2C	ordinary
SOD1	PRDX1	ordinary
MAPKAPK5	KALRN	ordinary
CSNK2B	NCAPH	ordinary
STUB1	CDC37	ordinary
MDM4	JMY	ordinary
PPME1	PPP2R2A	ordinary
PPP2R3B	RB1	ordinary
GUSB	GLB1	ordinary
GLB1L	PSAP	ordinary
TIGAR	PFKM	ordinary
YY1	COPS5	ordinary
SLC5A1	HK2	ordinary
BDH1	OXCT1	ordinary
OXCT1	SDHA	ordinary
TCIRG1	PICK1	ordinary
RANGAP1	AURKB	ordinary
POLK	RAD50	ordinary
NSMCE2	RAD21	ordinary
OPHN1	RHOT1	ordinary
ACTB	COPS7B	ordinary
PTPN11	IFNAR2	ordinary
RAB14	EXOC5	ordinary
LEF1	TCF4	ordinary
TRPV3	ATP2C2	ordinary
RPS23	DHX37	ordinary
NADSYN1	NICN1	ordinary
CHRM3	GNAQ	ordinary
RAB3GAP2	DYNC1LI2	ordinary
POLD4	RAD51AP1	ordinary
UAP1	SLC35A3	ordinary
EXOSC5	UTP18	ordinary
HPS1	RAB38	ordinary
PLA2G2F	LCLAT1	ordinary
GATAD2B	BRPF3	ordinary
ATP6V0D1	ADPGK	ordinary
TRAF2	IKBKB	ordinary
KBTBD7	NF1	ordinary
GGCT	CARS	ordinary
TRPC6	DES	ordinary
RPE	PPP2CA	ordinary
CAMK2G	EPB41L1	ordinary
EDC4	LSM3	ordinary
TTC21B	AKAP5	ordinary
PSEN2	DTX1	ordinary
STARD13	RHOV	ordinary
PKM	LDHA	ordinary
TNRC6C	NOTCH4	ordinary
VRK2	TMPO	ordinary
MTR	EPRS	ordinary
SUMF2	ARSG	ordinary
STAT4	LCP1	ordinary
NEFL	MYH3	ordinary
PI4KB	ARF1	ordinary
IDH1	WTIP	ordinary
ARFGAP3	USO1	ordinary
SHB	ITGAV	ordinary
RPTOR	ULK1	ordinary
LIN7C	STX1A	ordinary
MCRS1	RAD23A	ordinary
DHCR7	DHCR24	ordinary
TOMM5	CYC1	ordinary
PTPN18	ERBB2	ordinary
TP73	FAS	ordinary
CASP1	IL18	ordinary
PACSIN2	TGOLN2	ordinary
PPP3CC	YWHAH	ordinary
PSAT1	PSPH	ordinary
MED11	LPL	ordinary
IFT140	PRKACB	ordinary
SLC38A1	SLC38A2	ordinary
CDKN2D	CCND3	ordinary
INSR	PPP2R1B	ordinary
SPIDR	XRCC2	ordinary
ABCD4	ABCC1	ordinary
ABCC1	GGT5	ordinary
DYRK1A	RBBP4	ordinary
LIN37	E2F1	ordinary
SLC35A3	MGAT4B	ordinary
CD79B	BLNK	ordinary
DAPP1	PRKCH	ordinary
IL2RB	STAT5A	ordinary
DNAJB6	HSPA13	ordinary
OSBPL5	PLA2G12A	ordinary
TMLHE	SDHD	ordinary
TRPM4	SLC9A8	ordinary
SCNN1D	CAMK2B	ordinary
ACACA	ELOVL4	ordinary
VAMP2	CACFD1	ordinary
NFKB2	IL1B	ordinary
SLC35B4	B3GNT3	ordinary
OTUD5	MAVS	ordinary
MCU	SLC8B1	ordinary
IDO1	AFMID	ordinary
TFDP1	TK1	ordinary
CDK5R1	CDC25B	ordinary
TP53BP2	BBC3	ordinary
LDHB	SLC16A3	ordinary
MMS19	ERCC2	ordinary
IL23A	STAT4	ordinary
GGT7	DLG3	ordinary
NLK	TCF7L2	ordinary
CHCHD4	TIMM8A	ordinary
PSMD3	RELB	ordinary
ABCB7	ABCG2	ordinary
NRIP1	ARNTL	ordinary
MID1IP1	ELOVL1	ordinary
RBL2	CDC6	ordinary
SLC39A10	S100A8	ordinary
NFYB	DDIT3	ordinary
SLC24A3	TRPM2	ordinary
EPHA1	EFNA4	ordinary
GNAI1	ATP2B1	ordinary
USP11	NFKBIA	ordinary
NFKB1	IL1A	ordinary
PTGS1	PTGDS	ordinary
AKAP9	MYL6B	ordinary
MTMR3	PI4KA	ordinary
POLD3	RMI2	ordinary
COPS4	FBXL5	ordinary
PIAS3	MITF	ordinary
HDAC7	PML	ordinary
B3GNT5	MUC1	ordinary
KDSR	CERS2	ordinary
POFUT2	ADAMTS1	ordinary
TLR3	CASP8	ordinary
RAB33B	MAN1A2	ordinary
ARHGAP24	RAC3	ordinary
PDGFRB	FYN	ordinary
RNF4	BRCC3	ordinary
DNAJC2	HSPA14	ordinary
SLC39A14	PGLYRP3	ordinary
DCP1B	LSM2	ordinary
ACTR1A	FKBP4	ordinary
SLC25A28	FECH	ordinary
PARP16	NNMT	ordinary
SLC26A11	PAPSS2	ordinary
SH3GL1	SH3KBP1	ordinary
PRMT1	PRMT6	ordinary
NAA35	ACLY	ordinary
GFER	TIMM13	ordinary
RBX1	SPRED2	ordinary
B3GNTL1	MUC20	ordinary
PHYKPL	ALDH7A1	ordinary
ATP6V1A	ARL2	ordinary
RB1	SMC4	ordinary
NEURL1B	DLL4	ordinary
MED25	CEBPA	ordinary
PPFIA4	SLC1A3	ordinary
GNS	HEXA	ordinary
MCAT	NDUFAB1	ordinary
ACOT2	GCAT	ordinary
H2AFX	EYA2	ordinary
INO80B	RAD23B	ordinary
CNOT7	EIF4E	ordinary
SYN1	RAB3A	ordinary
SLX4	DNA2	ordinary
TRAF1	TRADD	ordinary
XIAP	TLE3	ordinary
WDR77	GEMIN7	ordinary
EZH2	CDKN2A	ordinary
FRAT1	PPP2R5E	ordinary
CCZ1B	RAB7A	ordinary
PSMA4	OAZ2	ordinary
RAB3GAP1	DCTN1	ordinary
PLPP5	PRKCE	ordinary
SGK1	SCNN1D	ordinary
MTMR12	PI4K2A	ordinary
IPMK	IPPK	ordinary
TULP3	PDE7A	ordinary
SPTAN1	COPZ1	ordinary
KCNN3	SLC12A2	ordinary
GABPB1	POLG2	ordinary
TPCN2	LMOD1	ordinary
LTA4H	CYP4B1	ordinary
CSNK2A2	NCAPG	ordinary
PEX12	PEX5	ordinary
PNPO	PRDX2	ordinary
PRDX6	GSR	ordinary
DLC1	RHOBTB1	ordinary
EPAS1	HIGD1A	ordinary
ALDH4A1	BCAT2	ordinary
AMPD2	RHCG	ordinary
FAM114A2	MAP2K2	ordinary
AGO4	NOTCH2	ordinary
MICAL1	GSTP1	ordinary
PRDX1	TXN	ordinary
PIAS4	MTA1	ordinary
GTF2H2	POLR2D	ordinary
PPA1	PYGL	ordinary
UBC	RFC3	ordinary
KIF7	GLI2	ordinary
FAAH	CYP2J2	ordinary
GUCY1B3	PDE5A	ordinary
ORMDL1	ATAT1	ordinary
ESD	MGST2	ordinary
RHOA	PKN3	ordinary
NMRK1	NMNAT2	ordinary
GNG11	CACNB3	ordinary
AKAP13	RHOU	ordinary
ACVR2B	BMPR1A	ordinary
EPS15	DAB2	ordinary
IL7	IL7R	ordinary
NCOA6	GRHL1	ordinary
TXNRD1	SEPHS2	ordinary
SLC25A22	GLUD2	ordinary
PARG	FEN1	ordinary
GIT1	MYL12A	ordinary
CYB5B	KARS	ordinary
SLC25A26	MRM1	ordinary
ERCC4	TOPBP1	ordinary
SREBF1	SCD	ordinary
PLCE1	DGKG	ordinary
PSMD14	CUL2	ordinary
AMOTL2	YAP1	ordinary
CDH1	SRC	ordinary
CYB5R4	SLC40A1	ordinary
TFG	SEC23A	ordinary
PDGFB	PDGFRB	ordinary
CEL	ABCA6	ordinary
PPP6R1	SEC24C	ordinary
PPP1CA	CSNK1E	ordinary
DHX9	RELA	ordinary
GGCX	VKORC1L1	ordinary
HOXA1	WDR5	ordinary
C2CD5	EXOC6	ordinary
ACOT4	SLC27A2	ordinary
ITPA	NT5C2	ordinary
SIRT3	IDH2	ordinary
NOD1	MAP2K3	ordinary
JAK1	IL10RA	ordinary
IL27RA	TYK2	ordinary
MYLK	MYH14	ordinary
RHOC	PKN2	ordinary
DENND6A	RAB14	ordinary
IL1B	MAP3K3	ordinary
TNIP2	MAP3K8	ordinary
PSMB4	ANAPC7	ordinary
SKP1	BTRC	ordinary
SPHK2	PLPP3	ordinary
CASP8	PLEC	ordinary
VDAC3	MCU	ordinary
ATG4D	MAP1LC3B	ordinary
NADK2	MCCC2	ordinary
MCCC1	CA5B	ordinary
ATP6V0A2	ABCC4	ordinary
CACNA2D3	TPM3	ordinary
MTFMT	MTHFD1L	ordinary
IL2RG	JAK3	ordinary
STRADA	PRKAB1	ordinary
L2HGDH	DLST	ordinary
PLK3	CDC25C	ordinary
MPC2	PDHB	ordinary
PC	MDH2	ordinary
ELOVL5	FADS1	ordinary
IGF1R	IRS1	ordinary
SUMF1	ARSD	ordinary
GALE	NUDT14	ordinary
ALS2CL	RAB5C	ordinary
POLR2G	NELFE	ordinary
PPARD	ACSL1	ordinary
FNBP1L	SCARB2	ordinary
PPP2CB	PPP2R5C	ordinary
A2M	RHOQ	ordinary
ERAP1	TAPBP	ordinary
MTX2	VDAC1	ordinary
CIAO1	POLD1	ordinary
ATF4	HERPUD1	ordinary
VPS28	PPIA	ordinary
DYNC1H1	HSP90AA1	ordinary
NPL	MPC1	ordinary
TAB3	MAP3K7	ordinary
HLA-DPA1	LCK	ordinary
YES1	BTC	ordinary
SERPINE2	VWF	ordinary
RHOQ	EXOC4	ordinary
PTDSS2	OSBPL8	ordinary
GABPA	MTERF1	ordinary
RBM28	DIEXF	ordinary
CEBPD	EBF1	ordinary
C2	C5	ordinary
TNFRSF10A	TNFRSF10B	ordinary
TNFRSF10D	TNFRSF10A	ordinary
DPH2	MTAP	ordinary
SLC39A8	S100A7	ordinary
TKFC	TALDO1	ordinary
TPI1	GPD1L	ordinary
SMURF1	PRICKLE1	ordinary
GPI	SLC37A1	ordinary
SPTBN2	KDELR3	ordinary
AXIN1	LRP5	ordinary
LYN	FCER1G	ordinary
HS6ST1	AGRN	ordinary
PRKG1	KCNMA1	ordinary
METAP2	DARS	ordinary
HLA-DRA	CD3G	ordinary
ULK1	DENND3	ordinary
ARHGEF15	RHOJ	ordinary
PLXNA3	CRMP1	ordinary
ASNS	NARS	ordinary
PSMD6	UBE2E1	ordinary
PPP5C	PIAS4	ordinary
RNF111	GTF2H3	ordinary
MIB2	JAG2	ordinary
NFYA	TM7SF2	ordinary
DNM1	AP2S1	ordinary
POLE3	RMI1	ordinary
MED1	RGL1	ordinary
TFPT	GPS1	ordinary
SDR16C5	DHRS3	ordinary
ATF6	HSP90B1	ordinary
RICTOR	AKT3	ordinary
MAPK8	BMF	ordinary
FOXO1	RAG1	ordinary
FANCD2	RAD51D	ordinary
INPP4A	SYNJ2	ordinary
MAPK12	MEF2D	ordinary
CCNE2	CDKN1B	ordinary
ICOS	CD80	ordinary
B4GAT1	ACAN	ordinary
CD3EAP	HIST1H2BC	ordinary
VAV3	ITPKB	ordinary
PAXIP1	DCLRE1C	ordinary
RNF216	RNF135	ordinary
HEYL	HEY2	ordinary
GBA2	SLC2A1	ordinary
ALDH5A1	SDHC	ordinary
STAT6	SOCS1	ordinary
MYLIP	VLDLR	ordinary
LMAN1	SEC24D	ordinary
EFNA4	VAV3	ordinary
GTF2H4	POLR2I	ordinary
MAT2A	TRMT112	ordinary
MEN1	HIST1H2BK	ordinary
ASNA1	SEC61B	ordinary
RUVBL2	DKC1	ordinary
EBF1	PPARG	ordinary
CRKL	RAP1A	ordinary
EFNA5	NGEF	ordinary
PFKL	ALDOC	ordinary
ACTR8	DDB1	ordinary
NMT1	BID	ordinary
XYLT1	HSPG2	ordinary
CTSS	HLA-C	ordinary
HCK	FCGR1A	ordinary
CYP4F11	CYP4F3	ordinary
SYNJ2	MTMR6	ordinary
RGS3	GNA11	ordinary
NUDT3	NUDT4	ordinary
DENND4B	GDI1	ordinary
VEGFA	ROCK1	ordinary
FOLH1	TTLL7	ordinary
TGS1	DDX20	ordinary
QDPR	CALM1	ordinary
CERS2	DEGS1	ordinary
TLL1	LOXL2	ordinary
LOXL1	MFAP2	ordinary
CAPZA2	NR3C1	ordinary
NAA38	SLC27A5	ordinary
DNM2	AP2A1	ordinary
GCNT4	MUC15	ordinary
PRKCD	CARD9	ordinary
AQR	ERCC6	ordinary
BCAT1	EGLN3	ordinary
SLC39A1	S100A9	ordinary
CSNK1E	DVL1	ordinary
METTL14	POLR2B	ordinary
MTMR4	VAC14	ordinary
TRMT112	GSPT1	ordinary
MMP16	TIMP2	ordinary
SYDE2	RHOG	ordinary
PPFIA1	SLC6A2	ordinary
CAPN1	FLG	ordinary
ADCY3	RAPGEF4	ordinary
GDE1	GPAT4	ordinary
SLC1A5	CTPS1	ordinary
MDM2	DYRK2	ordinary
TDP2	XRCC6	ordinary
PDE2A	GMPR2	ordinary
FCGR2A	NCKAP1L	ordinary
TRIB3	AKT2	ordinary
ESPL1	BUB1	ordinary
CTR9	UBE2A	ordinary
AHCYL1	TMOD3	ordinary
RYR3	TMOD1	ordinary
IL2RA	IL2RB	ordinary
FGFR4	FRS3	ordinary
EPHA4	EFNA5	ordinary
SLC5A3	SLC9A6	ordinary
TOP3A	FANCG	ordinary
DZIP1	SPOPL	ordinary
PSEN1	CDH1	ordinary
GGT5	DLG1	ordinary
TEK	KRAS	ordinary
HK3	SLC37A4	ordinary
MYO5A	EXOC8	ordinary
MBTPS1	ATF6	ordinary
LIG1	ISY1	ordinary
MCCC2	AUH	ordinary
SIGIRR	TLR6	ordinary
SPCS1	RPL15	ordinary
TNRC6B	NLK	ordinary
PDE7B	AK2	ordinary
MAOB	GPX1	ordinary
CDC25A	CCNE1	ordinary
VDAC1	MICU2	ordinary
NPAS2	BHLHE40	ordinary
EFNA3	VAV2	ordinary
PTK2B	VEGFA	ordinary
CREM	PER1	ordinary
E2F4	CDK1	ordinary
HIST1H2AE	HIST1H3D	ordinary
IRAK1	PELI3	ordinary
RAE1	SNRPD2	ordinary
FCGR3A	GRB2	ordinary
PRKDC	IRF3	ordinary
ST3GAL2	OMD	ordinary
PPP1R12A	MYH10	ordinary
DGAT1	FITM2	ordinary
PNPLA4	RETSAT	ordinary
SLC44A2	CHKB	ordinary
PGK1	GAPDH	ordinary
GZMH	IGFBP3	ordinary
GLUL	CTPS2	ordinary
CD180	LY96	ordinary
PIKFYVE	MTMR4	ordinary
BBS10	BBS4	ordinary
PIAS2	SUZ12	ordinary
SLC25A16	ALDH6A1	ordinary
KSR1	RAF1	ordinary
PIAS1	SP3	ordinary
BBS12	BBS9	ordinary
NDC1	XPOT	ordinary
SLC39A2	PGLYRP4	ordinary
MAP3K1	MAP2K4	ordinary
B3GAT3	GPC3	ordinary
AGO2	MYC	ordinary
ARRB1	EPS15L1	ordinary
WTAP	NCBP2	ordinary
SRF	ITGB1	ordinary
H2AFZ	NCAPH2	ordinary
CHKA	PCYT1A	ordinary
MTA1	TAF1C	ordinary
LMNB1	HIRA	ordinary
GAB2	FGFR1	ordinary
MUS81	KAT5	ordinary
SIRT6	RBBP8	ordinary
TDP1	XRCC5	ordinary
RFC2	RAD51C	ordinary
PPP1R13B	BAX	ordinary
DERA	ALDH1A1	ordinary
BAG3	HSPA6	ordinary
IDH3G	AASS	ordinary
TRAPPC8	RAB1A	ordinary
ATP6V0E2	AK8	ordinary
ZDHHC8	HDAC6	ordinary
ERAP2	B2M	ordinary
MOCOS	AARS	ordinary
HK1	G6PD	ordinary
AHCYL2	FGF13	ordinary
ADCY6	PDE8A	ordinary
XRCC5	PRKDC	ordinary
SLC25A11	LIMD1	ordinary
PCK2	SLC25A1	ordinary
RNF168	BARD1	ordinary
CDKN2B	CDK6	ordinary
CDK6	TFDP2	ordinary
SUV39H1	HIST1H2BG	ordinary
LAMTOR3	AIMP1	ordinary
SPRED3	RASA3	ordinary
MLX	ACACB	ordinary
GLB1	GNS	ordinary
SPHK1	PLPP1	ordinary
ABHD12	GK	ordinary
ARNT	CA9	ordinary
SSRP1	MDC1	ordinary
DLG3	SLC8A1	ordinary
SDHB	FH	ordinary
HIP1	IGF2R	ordinary
DENND4A	RAB10	ordinary
RAB10	EXOC2	ordinary
PPAT	SLC7A11	ordinary
PANK4	PPCS	ordinary
RPA3	HSPB1	ordinary
MADD	RAB27A	ordinary
ARF6	FCHO2	ordinary
HMGCL	NAGS	ordinary
CEBPB	KLF5	ordinary
IFNAR1	JAK1	ordinary
CACNA2D1	SORBS3	ordinary
OSBPL1A	DCTN4	ordinary
RNF2	BMI1	ordinary
HDAC4	RUNX3	ordinary
HIPK2	CBFB	ordinary
SLC37A4	G6PC3	ordinary
PCGF2	UBE2I	ordinary
FES	PLXNA3	ordinary
ACLY	NAA35	ordinary
CHRNA5	SRI	ordinary
NUDT14	PGM2	ordinary
RAD51D	BRCA1	ordinary
MKNK1	PPP2CB	ordinary
PIP5K1B	TREM2	ordinary
PPP2R5A	PDPK1	ordinary
N6AMT1	ETF1	ordinary
BOP1	RRP36	ordinary
TSC22D3	SCNN1B	ordinary
USP30	PTRH2	ordinary
KAT2A	TAF1D	ordinary
REEP5	GNGT1	ordinary
DSEL	DCN	ordinary
PRKCQ	EZR	ordinary
SUCLA2	HADHB	ordinary
CCNT1	SMAD4	ordinary
PPP1CC	CRY2	ordinary
SMC5	SMC1A	ordinary
ROCK1	PPP1R12A	ordinary
APP	ACTA2	ordinary
SMURF2	SMAD5	ordinary
SLC30A7	SOD3	ordinary
CHML	RAB23	ordinary
NUP37	GEMIN6	ordinary
CDS1	CDIPT	ordinary
TRPM2	ATP2A3	ordinary
IRF3	TBK1	ordinary
LRP8	GPC1	ordinary
RUNX3	LEF1	ordinary
NCEH1	ABCA1	ordinary
ABCA1	CPNE1	ordinary
IP6K1	PPIP5K1	ordinary
E2F2	EZH2	ordinary
STK4	LATS2	ordinary
PTPN6	LYN	ordinary
HPS4	RAB32	ordinary
IFIH1	CASP10	ordinary
IL33	FGFR4	ordinary
DLD	GCSH	ordinary
VAC14	MTM1	ordinary
ZBTB32	EME1	ordinary
SENP1	SUMO3	ordinary
IDH3A	TMLHE	ordinary
AADAT	GOT2	ordinary
OGDH	GCDH	ordinary
PRKCSH	CALR	ordinary
CTSL	HLA-B	ordinary
STIM1	PPP3R1	ordinary
DDX6	LSM6	ordinary
EPHB4	EFNB2	ordinary
MTMR6	PIP4K2A	ordinary
VNN2	PANK1	ordinary
MET	MYO18A	ordinary
ITSN2	ACTR2	ordinary
POLR2H	SOX2	ordinary
DTYMK	ATP6V0C	ordinary
PPP1CB	CSNK1D	ordinary
ABCC9	ATP1B1	ordinary
ACOT1	AACS	ordinary
CPT1B	SLC25A20	ordinary
GNPDA2	GFPT1	ordinary
MVB12A	UBA52	ordinary
USP33	CCP110	ordinary
NLRX1	TRIM25	ordinary
CASK	PPFIA1	ordinary
MMP3	LAMB3	ordinary
INPP5J	PIK3R3	ordinary
ABCD1	DPM2	ordinary
SHC1	TRPC1	ordinary
MBOAT7	PITPNM1	ordinary
AMDHD2	GNPDA1	ordinary
PPA2	SUCLA2	ordinary
PHLPP2	AKT1	ordinary
MMP1	IGF2	ordinary
ITPR3	CALD1	ordinary
CNGA1	PPP3CB	ordinary
PDGFA	PDGFRA	ordinary
POU5F1	EPHA1	ordinary
EXOSC2	UTP14A	ordinary
STAM2	EPS15	ordinary
NF1	RASA1	ordinary
ADAM10	JAG1	ordinary
FBXW11	NFKB1	ordinary
SLC39A4	GPR39	ordinary
RPIA	TKT	ordinary
EPHA2	EFNA3	ordinary
ASRGL1	FARSA	ordinary
TIMM17A	FXN	ordinary
LDHA	SLC16A1	ordinary
FCHO1	AP2M1	ordinary
NLRC5	IFIH1	ordinary
MAP2K6	BOC	ordinary
GNB1	INPP5A	ordinary
CNOT3	EIF4A2	ordinary
TFRC	PLEKHA1	ordinary
HEY2	HEYL	ordinary
NCALD	VDAC2	ordinary
DERL2	UBB	ordinary
PSMB9	TNFRSF1B	ordinary
ITPKC	INPPL1	ordinary
DEK	H2AFV	ordinary
POLB	PARP2	ordinary
PARP1	SMAD2	ordinary
TLR6	IRAK4	ordinary
ARHGAP11B	RHOD	ordinary
LCLAT1	PLA2G2F	ordinary
PAPSS1	SLC35B3	ordinary
HIST1H2BD	HIST1H3H	ordinary
CES3	ABCG1	ordinary
TYK2	IL27RA	ordinary
MTX1	TOMM40	ordinary
CLCN2	SLC6A11	ordinary
GOT2	DARS2	ordinary
PDP2	DLAT	ordinary
RAP1GAP	RAP1B	ordinary
RFC3	WRN	ordinary
REEP1	GNB1	ordinary
BRIP1	REV1	ordinary
PSMD11	BLMH	ordinary
MAX	CDC25A	ordinary
GLS	EARS2	ordinary
ABCA6	LCAT	ordinary
CHEK2	RNF8	ordinary
PDK3	PDHA1	ordinary
TAP2	ERAP2	ordinary
FAR1	AGPS	ordinary
NUP107	PHAX	ordinary
APAF1	CASP7	ordinary
PRPS1	NAPRT	ordinary
PGD	RPIA	ordinary
SOCS3	LEPR	ordinary
P4HA3	COL6A1	ordinary
ADAL	ADSS	ordinary
SMPD3	SGMS2	ordinary
DPM2	PIGL	ordinary
NEU1	GLB1L	ordinary
CBX2	CETN2	ordinary
PTPN3	STAM	ordinary
GAB1	PAG1	ordinary
CAD	DHODH	ordinary
TAP1	ERAP1	ordinary
NUDT5	PRPS2	ordinary
STON2	PIP5K1B	ordinary
VCP	HLA-A	ordinary
RGS16	GNAI3	ordinary
ANK3	TMED7	ordinary
MMAB	MUT	ordinary
MMAA	SUCLG2	ordinary
E2F3	EED	ordinary
RAPGEF2	HRAS	ordinary
DDX58	IRF7	ordinary
ANAPC16	FZR1	ordinary
MSRA	AIMP2	ordinary
POLH	BRCA2	ordinary
TRAP1	SDHB	ordinary
NFIB	POLR3K	ordinary
GEN1	BLM	ordinary
WNK2	SCNN1A	ordinary
HELZ2	TXNRD1	ordinary
RIN3	RAB31	ordinary
NPEPPS	THOP1	ordinary
SHMT2	AMT	ordinary
PIGU	PLAUR	ordinary
NUP155	KPNA4	ordinary
TP63	PERP	ordinary
PLA2G2A	GPAT3	ordinary
GNAS	PRKAR2B	ordinary
TNFRSF12A	TRAF2	ordinary
TTL	TUBB2A	ordinary
DCP1A	PATL1	ordinary
PLA2G4C	LPCAT4	ordinary
PDE4D	AMPD3	ordinary
MAP2K3	MAPKAPK3	ordinary
GPR161	PDE2A	ordinary
LRP12	GPC6	ordinary
PLA2G16	PLA2G4C	ordinary
WWP1	SCNN1G	ordinary
SEC11C	RPN1	ordinary
GALNT7	MUC4	ordinary
TOMM22	ATP5G1	ordinary
RBL1	CCNA2	ordinary
CDKN2A	CCND1	ordinary
SGIP1	SYT11	ordinary
CLEC7A	PLCG2	ordinary
ST6GALNAC6	SLC35A1	ordinary
ADAM9	COL17A1	ordinary
KYNU	SLC1A5	ordinary
SMC6	STAG1	ordinary
UNC13B	ARL6IP5	ordinary
CERS5	DEGS2	ordinary
ATP1B3	SCN4B	ordinary
UBE2D2	TLR3	ordinary
GNL3	PELP1	ordinary
CLCN7	ANO10	ordinary
HMGB2	H1F0	ordinary
TREM2	FGFR1OP2	ordinary
DVL3	EPHB3	ordinary
CIT	MYL9	ordinary
GAPVD1	RAB5B	ordinary
ISCU	AARS2	ordinary
TPST1	PODXL2	ordinary
ACOT9	BCKDHA	ordinary
HEPH	LCN2	ordinary
CSNK2A1	SMC2	ordinary
AKAP1	TPM2	ordinary
MDH2	SLC25A10	ordinary
HLTF	PCNA	ordinary
ARFGAP1	COPZ2	ordinary
CITED2	ARNT	ordinary
PTPN22	HLA-DRA	ordinary
PPM1A	PRKAG1	ordinary
RGS1	GNAI2	ordinary
NIPAL1	MRS2	ordinary
POLE	TOP3A	ordinary
LRIG1	EGFR	ordinary
CTSC	CD74	ordinary
ENO1	PKM	ordinary
USP2	TAB1	ordinary
MARC2	AZIN2	ordinary
RRM2	GLRX	ordinary
ALG10B	MAGT1	ordinary
CCT5	BBS5	ordinary
PTK2	WASL	ordinary
PTDSS1	PLA2G16	ordinary
PRKACA	LIPE	ordinary
ESCO1	PDS5A	ordinary
MED10	ANGPTL4	ordinary
C4A	C4B	ordinary
DDAH1	ASS1	ordinary
MOB1A	WWTR1	ordinary
NARFL	NUBP1	ordinary
MUT	ALAS1	ordinary
SLC3A2	GCLC	ordinary
RPS6KA4	L1CAM	ordinary
ITPR2	STIM1	ordinary
CBX8	SUMO1	ordinary
RAD18	UBE2N	ordinary
NAGS	ACAT1	ordinary
NSMCE1	SMC3	ordinary
IMPDH1	GMPS	ordinary
TEAD1	CTGF	ordinary
MTHFD2	MTHFD2L	ordinary
ALDOA	GNPAT	ordinary
REEP6	GNAL	ordinary
MCM3	PRIM2	ordinary
PIK3CD	NECAP2	ordinary
ATIC	ADSSL1	ordinary
FBXL5	IREB2	ordinary
RDH16	RDH12	ordinary
CLOCK	BHLHE41	ordinary
ALS2	RAB5A	ordinary
NOS1	GUCY1A2	ordinary
PTPRK	CBL	ordinary
NEURL1	DLL1	ordinary
CRTAP	COL1A1	ordinary
DHRS9	ALDH1A3	ordinary
PCNA	ISG15	ordinary
TAX1BP1	XIAP	ordinary
THBD	PROC	ordinary
ALDH1A3	FABP5	ordinary
HIST1H2BK	EYA3	ordinary
TOMM7	BCS1L	ordinary
FAM96B	NUBP2	ordinary
HADHA	ACADM	ordinary
DENND2C	RAB9A	ordinary
RFC5	PALB2	ordinary
KCNQ1	FXYD6	ordinary
CD3E	PRKCQ	ordinary
POLE2	XRCC3	ordinary
SUCLG1	NADK2	ordinary
AQP3	CD38	ordinary
SEMA4D	RRAS	ordinary
NUDT11	PPIP5K2	ordinary
VPS4B	CHMP2A	ordinary
ODC1	SRM	ordinary
VRK1	LEMD2	ordinary
TYMS	DHFR	ordinary
TMEM129	UBE2J2	ordinary
PAK2	MYLK	ordinary
MDC1	TP53BP1	ordinary
CBLB	NCK1	ordinary
SLC1A1	TTLL11	ordinary
KDM1A	HIST1H2AG	ordinary
CLTCL1	EGF	ordinary
PCOLCE2	COL5A2	ordinary
CROT	ACAA1	ordinary
DDAH2	NMRAL1	ordinary
PPP3CB	NFATC3	ordinary
PLD6	TRIAP1	ordinary
LOXL3	PXDN	ordinary
TBL1XR1	TIAM2	ordinary
HENMT1	TDRKH	ordinary
TECR	CERS5	ordinary
RGS19	GNA15	ordinary
SFRP1	LRP6	ordinary
PCF11	INTS3	ordinary
SCNN1A	NEFL	ordinary
SLC13A4	CAMK2A	ordinary
SCLY	GPT	ordinary
ATP12A	SLC24A3	ordinary
STAT2	STAT1	ordinary
RGS4	GNAZ	ordinary
P3H2	COL14A1	ordinary
CH25H	RXRA	ordinary
AP2M1	GRIP1	ordinary
ADCY2	PDE3B	ordinary
THTPA	SLC25A19	ordinary
NUP85	SNRPD3	ordinary
MMP15	NID1	ordinary
PSMB2	TNFRSF11A	ordinary
P4HA2	COL5A1	ordinary
SMC4	NCAPG2	ordinary
AGPAT3	PAFAH1B1	ordinary
RILP	CAPZA1	ordinary
PROC	F13A1	ordinary
TIMM50	HSCB	ordinary
SMPD4	VAPB	ordinary
CTSV	HLA-F	ordinary
NUP62	SLBP	ordinary
ECE2	EDN1	ordinary
USP34	TNKS	ordinary
CHMP2B	GABARAPL1	ordinary
IL36RN	IL36G	ordinary
UBXN7	DCUN1D1	ordinary
RORA	SREBF1	ordinary
FOXP3	IL2RA	ordinary
IFNAR2	IFNAR1	ordinary
CNGB1	TCAP	ordinary
UBIAD1	GGCX	ordinary
PTK6	KHDRBS1	ordinary
HIST1H4I	KDM4B	ordinary
EBNA1BP2	SENP3	ordinary
ATP6V1C2	PYGB	ordinary
LCMT1	PPP2R3B	ordinary
POFUT1	NOTCH1	ordinary
TADA2B	HIST2H2BE	ordinary
[truncated: 393 more rows]

## Sheet: KICH
gene1	gene2	type
SQLE	LSS	critical
NHLRC1	EPM2A	critical
SCLY	GPT	critical
SP1	CYP51A1	critical
METTL22	KIN	critical
CHMP5	CHMP4A	critical
EIF2AK3	EIF2S1	critical
ITPK1	IPPK	critical
HACL1	ALDH3A2	critical
ITGA4	ITGAL	critical
DGAT1	PNPLA4	critical
DGAT2	FITM2	critical
GART	PFAS	critical
RPS6KA5	ATF1	critical
HLCS	ACACB	critical
ITGAL	ITGA4	critical
SMAD4	JUNB	critical
SMAD3	BCL2L11	critical
FOXM1	CENPF	critical
SLIT2	ROBO1	critical
DNM2	AP2A2	critical
CCNE1	CDKN1B	critical
CFD	CFB	critical
NPL	MPC2	critical
ACO1	IDH1	critical
HSD3B7	PTGIS	critical
IL10RB	IL10RA	critical
PGAM1	ENO1	critical
APIP	ENOPH1	critical
ACTL6A	COPS3	critical
PRKG1	KCNMB1	critical
PRKG2	MRVI1	critical
FDFT1	SQLE	critical
NUDT3	NUDT4	critical
USP10	SNX3	critical
PPP5C	PIAS4	critical
COX10	COX15	critical
PIGV	PIGB	critical
MMP15	NID1	critical
SC5D	DHCR7	critical
UGDH	SLC35D1	critical
HPD	HGD	critical
TOR1A	STON1	critical
AP2A1	ROR2	critical
SLC35C1	FUT8	critical
KMT5A	PHF8	critical
MAN2A1	MGAT2	critical
SIRT3	IDH2	critical
PRMT3	RPS2	critical
FADS2	ABCD1	critical
IFNGR2	IFNGR1	critical
CHEK1	WEE1	critical
VRK1	TMPO	critical
KMO	KYNU	critical
CYBRD1	HEPH	critical
ZNF385A	SFN	critical
ALAD	HMBS	critical
RBSN	PIK3R4	critical
SRM	DHPS	critical
SORD	XYLB	critical
USP7	FOXO4	critical
FOXO3	SOD2	critical
FOXO1	RAG1	critical
ALDH1A1	GLYCTK	critical
EBP	SC5D	critical
PLIN3	RETSAT	critical
PFKM	ALDOC	critical
SH2B1	GHR	critical
SMAD2	CDKN2B	critical
NANS	NANP	critical
NKIRAS2	NFKBIB	critical
ITGB3	KDR	critical
PRKCA	ELAVL1	critical
PRELID3A	CDS2	critical
ABCG1	PLTP	critical
MPI	PMM2	critical
FZD1	CSNK1A1	critical
NEURL1	JAG2	critical
PHYH	HACL1	critical
AZIN2	AGMAT	critical
ISYNA1	IMPA2	critical
TRAF6	ITGB3BP	critical
CPOX	PPOX	critical
PMVK	MVD	critical
BAP1	HCFC1	critical
PPCS	PPCDC	critical
ATF2	MSH2	critical
MOCS2	GPHN	critical
NR1H4	HSD3B7	critical
CHUK	CYLD	critical
THBD	PROCR	critical
ACAT2	HMGCS1	critical
SLC27A2	AMACR	critical
AK3	NME4	critical
MCRS1	RBX1	critical
EIF2S1	ATF4	critical
CYP46A1	CYP39A1	critical
DPAGT1	ALG13	critical
CEBPB	KLF5	critical
MADD	RAB27B	critical
IKBKB	REL	critical
MTMR9	IMPA1	critical
CDKN2B	CDK6	critical
KITLG	KIT	critical
SLC2A5	KHK	critical
ECHS1	HADH	critical
CEACAM1	FN1	critical
RFK	FLAD1	critical
F10	F7	critical
FZD8	PARD6A	critical
AKR1A1	CRYL1	critical
ITGB3BP	MAPK8	critical
CRK	KIDINS220	critical
LIAS	MARS2	critical
PTGES2	CBR1	critical
PRKCZ	SPHK1	critical
SAE1	UBA2	critical
PARD6A	PRICKLE1	critical
ERBB4	CXCL12	critical
CTSA	SLC17A5	critical
CTSD	COL18A1	critical
SH2D2A	AXL	critical
INPP5B	INPP1	critical
RGP1	RAB6A	critical
RIN3	RAB31	critical
ATG12	ATG10	critical
ATG13	AMBRA1	critical
LIPT1	DHTKD1	critical
IL1B	SQSTM1	critical
NMNAT2	NADSYN1	critical
CYP27B1	CYP24A1	critical
GSTZ1	FAH	critical
DIO2	SULT1C2	critical
TFAP2A	TGFA	critical
SLC44A1	CHDH	critical
CD22	CD79B	critical
TIMP2	MMP2	critical
LGR4	ZNRF3	critical
AOX1	GPX2	critical
PTDSS1	PLA2G16	critical
CPT2	ACADVL	critical
MLX	ACACA	critical
PYGB	UGP2	critical
PYGL	PGM1	critical
DOHH	EIF5A	critical
IP6K1	IP6K2	critical
AFMID	KMO	critical
BTD	PDZD11	critical
HENMT1	TDRKH	critical
CRYM	PIPOX	critical
MASTL	ENSA	critical
NMRK2	NMNAT2	critical
IDUA	SGSH	critical
WWTR1	SMAD7	critical
CARNS1	CARNMT1	critical
USP13	USP10	critical
ENTPD8	ENTPD1	critical
RIC1	RAB6B	critical
TYK2	IL6ST	critical
CDS2	CRLS1	critical
TPK1	SLC25A19	critical
MST1	MST1R	critical
WWOX	TFAP2C	critical
MTHFD1L	MTFMT	critical
CTSK	MMP7	critical
TBC1D25	RAB33B	critical
ALG11	RFT1	critical
DENND6B	RAB14	critical
CAT	NUDT12	critical
ALOX5AP	ALOX12	critical
EBI3	IL27RA	critical
ENOPH1	ADI1	critical
NSDHL	HSD17B7	critical
DOLK	DPM2	critical
TDP2	XRCC6	critical
TFAP2C	ESR1	critical
PTK2B	SHB	critical
HGD	GSTZ1	critical
ARSA	GALC	critical
PROS1	F5	critical
ATP7A	ATOX1	critical
COL18A1	MMP9	critical
GP6	FCER1G	critical
DHPS	EIF5A2	critical
ECSIT	MAP3K1	critical
MTHFD2	MTHFD2L	critical
MTHFD1	MTHFR	critical
ADSL	ATIC	critical
INO80E	COPS7B	critical
RALGDS	RALB	critical
GNB5	PDE6B	critical
NUDT14	PGM2	critical
ARNT	CYP1A1	critical
SLC5A6	PANK2	critical
AURKA	PHLDA1	critical
SEPHS2	SEPSECS	critical
VAMP8	SH3D19	critical
SLC6A2	PNMT	critical
CERK	CPTP	critical
RUNX2	LGALS3	critical
VCPKMT	VCP	critical
ATG9B	BECN1	critical
GPHN	MOCOS	critical
RWDD3	SAE1	critical
MSMO1	NSDHL	critical
B4GALNT2	UMOD	critical
DCPS	NT5C3B	critical
SLC22A2	MAOA	critical
KYNU	HAAO	critical
UPP1	DPYD	critical
MAN2B2	MANBA	critical
MAN2B1	MAN2B2	critical
PLK2	NPM1	critical
GLRX3	ALAD	critical
PGAM5	FUNDC1	critical
TDP1	XRCC5	critical
CCT8	BBIP1	critical
YAP1	ITCH	critical
ENTPD1	ENTPD8	critical
SGMS2	SMPD3	critical
P4HB	IL12B	critical
TOR1B	STON2	critical
GNS	HEXA	critical
PDCD6IP	ANTXR2	critical
KBTBD7	NF1	critical
AMT	SHMT2	critical
GNPNAT1	PGM3	critical
ASPA	CAD	critical
MGAT1	MAN2A1	critical
SLC19A1	MTRR	critical
MTHFD2L	MTHFD2	critical
PGM2L1	PGP	critical
TBC1D1	RAB10	critical
DAGLA	MGLL	critical
RNF152	RRAGA	critical
DEGS2	ACER3	critical
OMA1	OPA1	critical
GCLM	GGCT	critical
GCLC	GSS	critical
MLXIPL	AGPAT1	critical
MYO7A	RDH11	critical
SGPL1	ALDH3B1	critical
RNF144A	UBE2L3	critical
DMPK	PLN	critical
ATG9A	ATG14	critical
GRB10	INSR	critical
CCND3	CBFB	critical
PIDD1	CASP2	critical
AMD1	SMS	critical
DAXX	MDM4	critical
ACSM5	GLYATL1	critical
CFI	CR1	critical
ALDH9A1	BBOX1	critical
BPHL	VARS	critical
F5	F8	critical
RFT1	ALG3	critical
NGFR	SMPD2	critical
VRK2	LEMD3	critical
ECI1	MECR	critical
HGS	STAM2	critical
LIPC	LDLR	critical
AASDHPPT	FASN	critical
HPS4	RAB32	critical
TMEM55B	ING2	critical
FGR	LRP8	critical
CYB5R3	CYB5A	critical
NOS1	GUCY1A2	critical
ALG2	ALG11	critical
ALG1	ALG2	critical
ALG6	ALG8	critical
FUK	FPGT	critical
MAOB	PRDX6	critical
RAB13	EXOC1	critical
MAPK7	MEF2A	critical
BACE1	APP	critical
HIF1A	RORA	critical
SLC31A1	ATP7B	critical
LCAT	CEL	critical
CEBPD	EBF1	critical
ACADM	DECR1	critical
GMDS	TSTA3	critical
SLC1A5	SLC38A1	critical
USP47	POLB	critical
TOMM40	PINK1	critical
RANBP10	RANBP9	critical
FUOM	FUK	critical
COQ2	COQ6	critical
PGM3	UAP1	critical
KIT	SH2B2	critical
MTF1	CSRP1	critical
CHAC2	CNDP2	critical
CHAC1	OPLAH	critical
IFNAR2	IFNAR1	critical
GALK1	GALT	critical
LGMN	TLR7	critical
HBEGF	GPNMB	critical
ZBED1	CHD3	critical
PCYT1A	CHPT1	critical
LRP2	CUBN	critical
ESR1	KCTD6	critical
LIMK1	CFL1	critical
PECR	PHYH	critical
PKN1	PPP1R14A	critical
INO80D	COPS8	critical
ALDOB	TKFC	critical
HMBS	UROS	critical
PPCDC	COASY	critical
PGLS	PGD	critical
PPIP5K1	IP6K3	critical
DNM1	AP2S1	critical
ADI1	MTHFD1	critical
HPS1	RAB38	critical
G6PD	PGLS	critical
HMOX1	FTL	critical
HEPH	LCN2	critical
USP19	RNF123	critical
NPM1	NOP2	critical
EEF1A2	EEF1A1	critical
OTUB1	RNF128	critical
LZTFL1	ARL6	critical
HMGCS1	HMGCR	critical
SHPRH	UBE2N	critical
ABHD14B	SULT1C4	critical
MTAP	APRT	critical
MOCOS	AARS	critical
DMGDH	SARDH	critical
CDK11B	CEP131	ordinary
TUBB	AJUBA	ordinary
NUP93	SLBP	ordinary
IGF2R	ARPC3	ordinary
PIP5K1B	NTN1	ordinary
ATP6V1C1	AK9	ordinary
FXYD6	SLC13A3	ordinary
GLUL	CTPS1	ordinary
CTPS1	SLC25A22	ordinary
ERBB2	PLXNB1	ordinary
TRIM24	CYFIP2	ordinary
PLA2G6	CYP2U1	ordinary
IDH1	WTIP	ordinary
CDS1	CDIPT	ordinary
FGF2	FRS2	ordinary
CD247	ITK	ordinary
ATP1B3	SCN4B	ordinary
TRPC1	RASGRF2	ordinary
STXBP1	DNAJC5	ordinary
TRAF1	TNFRSF1A	ordinary
FGFR1OP	WASF3	ordinary
VAV3	ITPKB	ordinary
CALM2	IQGAP3	ordinary
ARF1	KDELR1	ordinary
PIK3C2A	PIKFYVE	ordinary
SPCS1	RPL15	ordinary
MBD3	UBTF	ordinary
PIP4K2C	GNG2	ordinary
MAPK1	ELK1	ordinary
NAGS	ACSM5	ordinary
RAD50	POLK	ordinary
POLR2G	NELFE	ordinary
RPS16	IMP3	ordinary
AHCY	CTH	ordinary
GNAI2	CD209	ordinary
DLG1	ATP2C1	ordinary
LAMTOR4	IARS	ordinary
CCNH	CDKN1C	ordinary
POLR2D	MDC1	ordinary
ARHGEF7	PAK1	ordinary
PAK1	CTNND1	ordinary
TLR2	TIRAP	ordinary
NCK1	MAPK14	ordinary
ARPC5	VAMP4	ordinary
LIPT2	NDUFAB1	ordinary
NSMCE4A	SMC3	ordinary
PPP2R5B	AXIN1	ordinary
AKT2	GSK3A	ordinary
EP300	TNFRSF21	ordinary
AGFG1	ARPC2	ordinary
ARPC3	VAMP8	ordinary
CDC37	LRRFIP1	ordinary
GDA	RHBG	ordinary
DVL1	PLCB3	ordinary
EPHB3	TIAM1	ordinary
BRCA1	USP7	ordinary
GNG12	CACNB2	ordinary
FRS2	CPSF6	ordinary
FCGR3A	CNTRL	ordinary
USP15	KEAP1	ordinary
STX1A	TRPC4AP	ordinary
MCOLN3	SORBS1	ordinary
ARNTL	BHLHE41	ordinary
PSMD14	CUL2	ordinary
NDC1	XPOT	ordinary
ATP2B1	ATP2A2	ordinary
PPP2R1A	PPP2R5C	ordinary
GLE1	NUP205	ordinary
NUP153	CPSF2	ordinary
CCAR2	SERPINH1	ordinary
PSMB1	NUMB	ordinary
TP53	PIDD1	ordinary
PPFIA3	SLC1A3	ordinary
SLC1A3	SLC25A12	ordinary
ITPR3	STIM1	ordinary
GNG11	CACNB3	ordinary
INPP5K	EPN2	ordinary
CACNB1	CPNE1	ordinary
ACTR5	DDB2	ordinary
COPS5	COMMD5	ordinary
ALG10	STT3A	ordinary
RRAGC	SLC7A7	ordinary
GNG10	INPP5J	ordinary
CNTRL	ABI2	ordinary
PIK3CA	PICALM	ordinary
NME1	WDR19	ordinary
TCIRG1	PICK1	ordinary
CTSL	HLA-C	ordinary
PIAS4	MTA1	ordinary
KAT2A	TAF1D	ordinary
ATM	ERCC3	ordinary
PSMA6	ANAPC10	ordinary
NPEPPS	THOP1	ordinary
NUPL2	CPSF4	ordinary
GNAZ	PDE3B	ordinary
VPS4A	CHMP3	ordinary
POLR2I	SALL4	ordinary
XRCC1	XAB2	ordinary
TNFRSF10D	TNFRSF10A	ordinary
TNFRSF10C	TNFRSF10B	ordinary
PSMB10	CD40	ordinary
SNAP25	SLC1A2	ordinary
SLC25A12	PAICS	ordinary
COPS3	LRR1	ordinary
LIN7B	PPFIA3	ordinary
EFNB2	PAK2	ordinary
PAK2	MYLK	ordinary
HHAT	SHH	ordinary
ACSL1	PPARD	ordinary
ERCC1	RFC2	ordinary
RFC2	TOP3A	ordinary
APH1A	EPHB4	ordinary
PAFAH1B2	DYNC1LI2	ordinary
SHC1	TRPC1	ordinary
ARF6	FCHO2	ordinary
ITSN2	PLEKHA2	ordinary
CTTN	AVPR2	ordinary
SEC24D	SEC31A	ordinary
COASY	SLC25A16	ordinary
MORC2	NAA30	ordinary
LDLR	TFRC	ordinary
VAMP4	PIP5K1A	ordinary
HIST1H2BC	HIST4H4	ordinary
BTK	WIPF1	ordinary
POLH	DNA2	ordinary
SAP30BP	H3F3B	ordinary
H2AFZ	NCAPH2	ordinary
RAB18	ACTR10	ordinary
CAPZA2	NR3C1	ordinary
GPT	RIMKLA	ordinary
ISG15	KPNA5	ordinary
HIBCH	BCKDHB	ordinary
GCAT	GLDC	ordinary
ACSL6	ZDHHC21	ordinary
UBE2V2	SUMO2	ordinary
KDM4A	HERC2	ordinary
CACNB3	CACNB1	ordinary
CNGA1	PPP3CA	ordinary
CBL	TGFBR2	ordinary
DAPP1	PRKCH	ordinary
AHCYL1	UNC13B	ordinary
SRI	MASP1	ordinary
NCL	WDR43	ordinary
GNGT2	DGKI	ordinary
SPTBN1	ARCN1	ordinary
RAB8A	EXOC7	ordinary
SUCLG2	SLC27A3	ordinary
MMP14	LAMA5	ordinary
FGFR2	WASF2	ordinary
RAC1	MYH11	ordinary
SNX18	SLC2A8	ordinary
VAMP2	P2RX7	ordinary
ACOT9	BCKDHA	ordinary
HADHA	ACADS	ordinary
IL1RAP	BCR	ordinary
SYK	PIK3AP1	ordinary
DVL2	HGS	ordinary
PSMB2	TNFRSF11A	ordinary
NBN	TCEA1	ordinary
RPS27	FBL	ordinary
PSMC3	ANAPC11	ordinary
NFKB2	IL1B	ordinary
LEF1	CCND1	ordinary
HIST1H2BN	EYA3	ordinary
COPS4	FBXL5	ordinary
LCLAT1	ACSL3	ordinary
PRMT5	GEMIN2	ordinary
KCNMB1	SLC12A2	ordinary
FXYD2	KCNJ8	ordinary
MARC2	SLC7A6	ordinary
SMARCD3	SLC27A1	ordinary
NR6A1	TDGF1	ordinary
PLCB3	PRKCZ	ordinary
AMOTL2	YAP1	ordinary
RMI1	MNAT1	ordinary
RAB7A	CAPZA2	ordinary
DCTN2	NR3C2	ordinary
RB1	ORC5	ordinary
ERLIN2	FGF2	ordinary
SLC6A4	TTYH2	ordinary
SLC35B2	CHST1	ordinary
RRP1	RRP7A	ordinary
PSMC1	MAD2L1	ordinary
TPP2	GOT1	ordinary
PSMD11	CDC16	ordinary
TNFRSF12A	TRAF2	ordinary
PDE3A	GMPR	ordinary
PPAT	SLC7A11	ordinary
ARFGAP2	CD59	ordinary
AGTPBP1	TPGS2	ordinary
UBE2D1	SMAD9	ordinary
AGO4	NOTCH2	ordinary
GSR	CHAC2	ordinary
CHMP4A	PPIA	ordinary
RPS27A	POLD2	ordinary
SLC4A4	FGF13	ordinary
RXRA	PLIN2	ordinary
SLC7A6	SLC3A1	ordinary
HDAC8	NAA38	ordinary
TOP3A	LIG3	ordinary
CD3E	PRKCQ	ordinary
NSMCE3	UBE2I	ordinary
CACFD1	CALD1	ordinary
ARHGEF9	AGT	ordinary
RBBP8	FANCC	ordinary
SLC6A12	CLCN2	ordinary
CLCN2	SLC6A4	ordinary
IL33	FGFR4	ordinary
P4HA3	COL6A3	ordinary
BARD1	AQR	ordinary
PMPCA	TIMM50	ordinary
KAT2B	HEY2	ordinary
HIST2H2BE	EYA4	ordinary
CDC16	IL6	ordinary
PSMD3	ANAPC15	ordinary
RAD51D	BRCA1	ordinary
FGFR1OP2	ABI1	ordinary
DVL3	MYD88	ordinary
PIK3R1	ITSN1	ordinary
PSME4	ANAPC1	ordinary
GNG2	RASGRP3	ordinary
ITK	INPP5B	ordinary
NEDD8	BIRC5	ordinary
PEX2	UBE2D3	ordinary
UBE2D3	SMAD1	ordinary
BAG2	HSPA12B	ordinary
HIST1H2BK	HIST1H4I	ordinary
GLUD2	CPS1	ordinary
ADHFE1	ALDH5A1	ordinary
NEK9	RAE1	ordinary
SEH1L	SNRPD1	ordinary
MTMR2	PITPNB	ordinary
CACNA2D4	SORBS3	ordinary
VDAC2	MICU1	ordinary
FGFR1	GAB2	ordinary
PLCG1	DGKD	ordinary
RHOA	PKN3	ordinary
CACNB4	VDAC3	ordinary
UNC13B	ARL6IP5	ordinary
MYO18A	GAB1	ordinary
PSMD12	HNRNPD	ordinary
SPRED1	RASAL2	ordinary
ADCY7	PDE1B	ordinary
NUP210	SYMPK	ordinary
TRPM7	TMOD3	ordinary
CLTC	AP3B1	ordinary
FYN	NRG1	ordinary
ARFGAP3	USO1	ordinary
CD59	SAR1B	ordinary
TFPT	GPS1	ordinary
MTA1	TAF1C	ordinary
HIST1H4I	KDM4B	ordinary
HRAS	AGTRAP	ordinary
ATXN7	HIST2H2BF	ordinary
TPCN2	LMOD1	ordinary
BLM	MAD2L2	ordinary
BLMH	TAP1	ordinary
TRPM3	TNNC2	ordinary
AKT3	FOXO3	ordinary
SLC20A2	SLC9A9	ordinary
DLG4	MYL6B	ordinary
COLGALT1	COL8A2	ordinary
HSPA8	AP1S3	ordinary
PRKAA1	LAMTOR3	ordinary
CACNA1C	SPARC	ordinary
VDAC3	MICU3	ordinary
SBF2	PPP2R1A	ordinary
PIP4K2A	SH2D2A	ordinary
EXOSC3	NOL6	ordinary
SLC20A1	SLC4A4	ordinary
HSBP1	DNAJB6	ordinary
GPS1	COMMD4	ordinary
INPP5D	PACSIN3	ordinary
UBB	RFC5	ordinary
HIST1H2BD	CHEK2	ordinary
SSU72	NABP2	ordinary
ESPL1	BUB1	ordinary
TXK	TRPC3	ordinary
ITPKB	ITPK1	ordinary
RBL2	MYBL2	ordinary
CDC6	POLE	ordinary
CCNT1	SMAD4	ordinary
FANCD2	FANCM	ordinary
PSMD2	CKS1B	ordinary
MAP3K7	CHUK	ordinary
KIF2C	HLA-DQB2	ordinary
HLA-DRB1	LCP2	ordinary
HLA-E	FCGR3A	ordinary
USP2	TAB1	ordinary
NUP160	IPO8	ordinary
RBBP7	BRPF3	ordinary
TRPM2	TPM4	ordinary
SLC44A2	CHKB	ordinary
CDK11A	CEP72	ordinary
ASNA1	SEC61B	ordinary
GNG7	DGKZ	ordinary
FXYD4	HCN2	ordinary
RPS3A	TBL3	ordinary
FCHO2	PLEKHA1	ordinary
MTA2	BRPF1	ordinary
UBA3	SKP1	ordinary
SKP1	BTRC	ordinary
GNB2	CUX1	ordinary
RYR2	DES	ordinary
PSMD6	BUB1B	ordinary
LNPEP	HLA-G	ordinary
NUP107	SNRPD3	ordinary
IHH	SMURF1	ordinary
TRPV4	CPLX1	ordinary
PPP3R1	YWHAQ	ordinary
EGFR	PXN	ordinary
MMP1	IGF2	ordinary
CACNA2D1	TNNI1	ordinary
PSME3	NPEPPS	ordinary
CACNA2D2	CACNA2D1	ordinary
ATP2A2	NOTCH3	ordinary
SLC4A9	SLC9A3	ordinary
PSMA4	OAZ2	ordinary
NFIB	POLR3K	ordinary
YWHAB	FAM114A2	ordinary
FAM114A2	MAP2K2	ordinary
RPS28	HEATR1	ordinary
CCNB1	NDC80	ordinary
KAT5	FANCA	ordinary
SLC5A3	SLC9A6	ordinary
H2AFX	EYA2	ordinary
PSMC6	SKP2	ordinary
PI4K2A	SH3GL1	ordinary
OSBPL5	PLA2G12A	ordinary
CASP8	PLEC	ordinary
CISH	IL2RG	ordinary
ATP6V1C2	AK7	ordinary
GUK1	TTC21B	ordinary
CSNK1D	GOSR2	ordinary
SLC25A6	MB21D1	ordinary
ADCY9	PDE4A	ordinary
MCOLN2	DYSF	ordinary
MAPK3	RPS6KA5	ordinary
RPS6KA3	CREB1	ordinary
RPS15A	RPS14	ordinary
FASN	MORC2	ordinary
POFUT2	ADAMTS1	ordinary
NECAP1	M6PR	ordinary
FXYD3	SCN1B	ordinary
DNMT1	H2AFJ	ordinary
BAG1	HSPA12A	ordinary
TNFSF12	BIRC2	ordinary
ARF3	TMED2	ordinary
PIK3C2G	TRIP10	ordinary
ELL	GTF2H5	ordinary
OTUD7B	TAB2	ordinary
TAB3	MAP2K4	ordinary
EPN1	CLTB	ordinary
EXOSC8	NOP58	ordinary
RRAGB	MARS	ordinary
PSMC2	CDC23	ordinary
PSMD9	ANAPC5	ordinary
USP8	LRIG1	ordinary
HELZ2	GLIPR1	ordinary
CTPS2	TTLL4	ordinary
SLC25A22	GLUD2	ordinary
NEFL	TNNC1	ordinary
ATP6V1B2	ADPGK	ordinary
PSMD4	TNKS2	ordinary
SUCLG1	SDHB	ordinary
RPS13	UTP14A	ordinary
SLC8A1	ORAI2	ordinary
TGOLN2	ACTR3	ordinary
CRTAP	COL1A1	ordinary
YY1	RAD23B	ordinary
AXL	ZMYM2	ordinary
GAB1	PAG1	ordinary
COQ5	COQ9	ordinary
FRAT2	PPP2R5A	ordinary
PPP2R5E	YWHAB	ordinary
RAP1A	SYK	ordinary
PTK2	WASL	ordinary
EIF5	EIF3J	ordinary
RPS27L	DCAF13	ordinary
ASL	NOS1	ordinary
NOS3	GUCY1A3	ordinary
C1D	UTP6	ordinary
PSMB9	TNFSF12	ordinary
TRAF3	MAP3K14	ordinary
IRF3	TBK1	ordinary
CHD4	KAT6A	ordinary
EXOSC2	RCL1	ordinary
CEPT1	PTDSS2	ordinary
LPCAT1	PNPLA8	ordinary
DNAJC6	CPD	ordinary
CLTA	AP1S2	ordinary
PCF11	INTS3	ordinary
STAT4	LCP1	ordinary
GNB1	CACNA1C	ordinary
TRPC6	TPM1	ordinary
RRAGA	SLC3A2	ordinary
PSMF1	BUB3	ordinary
NFYB	DDIT3	ordinary
CHML	RAB23	ordinary
HERC2	KDM4A	ordinary
RBM28	DIEXF	ordinary
IQGAP1	MAP2K1	ordinary
PIK3R5	ARRB2	ordinary
ITSN1	ARPC5	ordinary
LMNB1	HIRA	ordinary
EXOSC1	WDR46	ordinary
COPS8	KLHL5	ordinary
DNAJB1	HSPA1A	ordinary
P4HA1	COL5A3	ordinary
REPS1	MYO10	ordinary
GPSM3	CCR1	ordinary
GNG5	CACNA2D2	ordinary
DNMT3B	HIST1H2BD	ordinary
DYNLL1	FKBP4	ordinary
CALM1	IQGAP2	ordinary
PPIB	COL12A1	ordinary
RFC4	RAD51B	ordinary
NCOA1	GRHL1	ordinary
ATP1B1	SLC9A1	ordinary
ARF4	KDELR2	ordinary
PSMD10	UBE2E1	ordinary
PSMD5	CDC27	ordinary
XYLT1	HSPG2	ordinary
GDPD5	SLC44A1	ordinary
UBE2N	PELI1	ordinary
AP2A2	FZD5	ordinary
CD4	PIP5K1C	ordinary
SIRT1	CLOCK	ordinary
LPCAT4	PLD6	ordinary
FCGR1A	LAT2	ordinary
FAM13B	CDC42	ordinary
P2RX7	ANXA1	ordinary
NUP214	SNRPB	ordinary
RYR3	TMOD1	ordinary
FCHO1	INPP4A	ordinary
RIOK3	TSR1	ordinary
RPS5	RPS9	ordinary
CDK1	NCAPH	ordinary
VPS4B	CHMP2A	ordinary
PSMC4	SPOP	ordinary
LTBR	TRAF3	ordinary
LIG1	PPIE	ordinary
OSBPL8	SACM1L	ordinary
RPS24	RPS7	ordinary
KLC2	ACTR1A	ordinary
CYLD	RBCK1	ordinary
CASP3	STK4	ordinary
ROCK1	PPP1R12A	ordinary
FANCI	POLR2A	ordinary
PSMB3	BLMH	ordinary
AADAT	EARS2	ordinary
TMLHE	SDHD	ordinary
SYNJ1	SYNJ2	ordinary
DCAF13	CUL4B	ordinary
AGPS	ACAA1	ordinary
PSMD8	GTSE1	ordinary
PSMB6	OAZ1	ordinary
NUP133	WDR33	ordinary
EIF1AX	RPL6	ordinary
SKIV2L2	UTP15	ordinary
RPS23	NOC4L	ordinary
FCGR2A	FYN	ordinary
ATP6V0A1	DTYMK	ordinary
RANBP2	KPNB1	ordinary
LPCAT2	PLD4	ordinary
PLD2	PITPNM3	ordinary
COPS7B	CCNF	ordinary
PLA2G4A	DYNC1I1	ordinary
TNKS2	PTEN	ordinary
HSCB	GLRX5	ordinary
ADCY3	PDE2A	ordinary
HMGB2	H1F0	ordinary
POLK	RAD50	ordinary
DGKQ	LPIN3	ordinary
NUP188	KPNA2	ordinary
MPHOSPH6	NOL11	ordinary
MAPK11	TCF3	ordinary
POLE3	RMI1	ordinary
PIK3C3	VAC14	ordinary
UBA52	RFC4	ordinary
OPLAH	BCAT1	ordinary
LIG3	ZNF830	ordinary
SPTAN1	COPE	ordinary
CTSC	CD74	ordinary
CNOT3	EIF4A2	ordinary
NUP35	SNRPG	ordinary
HK1	G6PD	ordinary
SLC37A4	G6PC3	ordinary
RAF1	TRAK1	ordinary
PEMT	STARD10	ordinary
MTMR6	PIP4K2A	ordinary
PI4K2B	REPS2	ordinary
PSMB4	ANAPC7	ordinary
PPFIA1	ACHE	ordinary
PSMD1	CUL3	ordinary
PPP3CB	NFATC1	ordinary
PDGFRB	FCGR1A	ordinary
RGS3	GNA11	ordinary
GNA15	DAGLB	ordinary
SLC25A11	LIMD1	ordinary
ATIC	IMPDH2	ordinary
TYMS	DHFR	ordinary
GRIK5	ATP2A1	ordinary
ITPKC	INPPL1	ordinary
CHM	RAB22A	ordinary
SMC5	SMC1A	ordinary
PTEN	DOCK1	ordinary
PLCB2	ITPR1	ordinary
DIAPH2	CKAP5	ordinary
RPS11	DDX49	ordinary
FOLH1	TTLL7	ordinary
SLC25A13	ASNS	ordinary
RYR1	ANXA6	ordinary
AKAP9	SLC24A1	ordinary
PLCD3	ITPKC	ordinary
STAM2	EPS15	ordinary
SEC23A	CTSZ	ordinary
PSMA2	ANAPC16	ordinary
PLCD1	PRKCD	ordinary
DGKZ	LPIN1	ordinary
MAT1A	TPMT	ordinary
N6AMT1	GSPT2	ordinary
SOS1	PIK3R1	ordinary
DNAJB6	HSPA2	ordinary
LPIN2	PRKCB	ordinary
TRPV2	TLN1	ordinary
PCP2	S1PR3	ordinary
PHB	KSR1	ordinary
KSR1	RAF1	ordinary
FNBP1L	SCARB2	ordinary
PIK3CB	SNX18	ordinary
SLC12A6	SLC4A3	ordinary
NRAS	AGK	ordinary
CARM1	TRIB3	ordinary
P2RX4	NEB	ordinary
FAM20C	MFGE8	ordinary
RUNX1	SOCS3	ordinary
TPCN1	VCL	ordinary
POLE	XRCC3	ordinary
FZD2	AMER1	ordinary
PIK3CG	SGIP1	ordinary
STAM	SH3KBP1	ordinary
PDHB	ACAA2	ordinary
SEC24C	SEC23IP	ordinary
POLR2B	ATR	ordinary
ARF5	COPA	ordinary
DNA2	POLH	ordinary
TFDP2	CDT1	ordinary
EZH2	CDKN2A	ordinary
RAB3GAP1	DCTN1	ordinary
MYH7B	EXOC6	ordinary
PI4KB	ARF1	ordinary
SRC	QKI	ordinary
ALS2	RAB5A	ordinary
MPDU1	ALG12	ordinary
UAP1	SLC35A3	ordinary
HDAC6	MID1IP1	ordinary
NUP62	GEMIN6	ordinary
PIK3CD	NECAP2	ordinary
DENND4C	CHM	ordinary
WNT5A	DVL2	ordinary
BLNK	DAPP1	ordinary
SLC6A6	ANO9	ordinary
PRKCH	GNAZ	ordinary
APP	ACTA2	ordinary
P4HA2	COL5A1	ordinary
CLU	C6	ordinary
PSME1	UBE2C	ordinary
GRIN2A	RIMS1	ordinary
SUPT5H	SNAPC4	ordinary
PKM	ATP6V1D	ordinary
LAT2	VAV1	ordinary
BAG4	HSPA4L	ordinary
SLC24A3	ATP2B4	ordinary
GTF2H4	GTF2F2	ordinary
CD86	NCKAP1L	ordinary
RTP4	OR1L8	ordinary
GNAL	PRKACA	ordinary
BHLHE41	PER2	ordinary
ASB7	CUL5	ordinary
PAFAH1B1	DYNC1H1	ordinary
CAPZA1	HSP90AB1	ordinary
PLD1	DDHD1	ordinary
ANXA2	PLAT	ordinary
KLHL12	DVL1	ordinary
SPRED2	SYNGAP1	ordinary
TNIK	MAP3K5	ordinary
VAV1	INPP5D	ordinary
ALDH5A1	SDHC	ordinary
PRKAA2	TSC1	ordinary
LRP6	PPP2R5D	ordinary
TRPM4	SLC9A8	ordinary
MEN1	HIST1H2BK	ordinary
NUP98	XPO1	ordinary
NUP58	KPNA3	ordinary
MAPK12	MEF2D	ordinary
MEF2D	PPARGC1A	ordinary
FES	PLXNA3	ordinary
TLR4	IRAK4	ordinary
GNB4	CACNA1D	ordinary
ASPH	PPP3CB	ordinary
ADCY5	RAPGEF3	ordinary
RAPGEF4	KCNJ11	ordinary
PSMB5	LTBR	ordinary
CUL3	SPRED1	ordinary
ACHE	SLC44A3	ordinary
PSMD13	TNFRSF12A	ordinary
ACSS2	ACAT2	ordinary
ERBB3	FGF1	ordinary
ACTB	COPS5	ordinary
COPS6	FBXO32	ordinary
MCM7	POLE2	ordinary
BBS10	BBS1	ordinary
GTF2H3	POLR2J	ordinary
AGPAT1	PLA2G4A	ordinary
LIN52	E2F1	ordinary
RPS8	RRP9	ordinary
IL6R	PTPN11	ordinary
FBXL5	IREB2	ordinary
PLCE1	OCRL	ordinary
TPR	HNRNPC	ordinary
SUCLA2	HADHB	ordinary
OSBPL10	PLA1A	ordinary
FCER1G	PLCG2	ordinary
RABGGTA	RAB24	ordinary
UBXN7	DCUN1D1	ordinary
COLGALT2	COL4A5	ordinary
PSMA1	LTB	ordinary
QDPR	CALM1	ordinary
RABGGTB	RAB3D	ordinary
RAB11A	EXOC3	ordinary
SMPD2	CERK	ordinary
NRG1	KL	ordinary
METTL3	POLR2I	ordinary
ORMDL1	ATAT1	ordinary
RFC5	PALB2	ordinary
CPSF6	TEC	ordinary
INO80	COPS2	ordinary
NOS2	GUCY1B3	ordinary
SEC11A	RPS17	ordinary
NUP43	DDX20	ordinary
ANO6	SLC6A6	ordinary
WDR77	GEMIN7	ordinary
PRPS2	HPRT1	ordinary
GOT1	SLC25A13	ordinary
TTC21B	RAPGEF4	ordinary
TGS1	SNRPF	ordinary
TXNRD1	HBEGF	ordinary
SLC25A4	ATP6V1H	ordinary
PTPN6	LYN	ordinary
GBF1	COPG1	ordinary
PRKAB2	LAMTOR5	ordinary
LAMTOR2	AKT1S1	ordinary
MCM5	POLA2	ordinary
SNX9	IGF2R	ordinary
SLC4A1	ANO4	ordinary
RFC1	NBN	ordinary
NCOA2	PPARA	ordinary
PSMC5	EGLN1	ordinary
DCTN4	PTGES3	ordinary
NUP155	KPNA4	ordinary
TBL1XR1	FHL2	ordinary
TMED5	WNT9A	ordinary
SLC26A6	ANO10	ordinary
PPP2R5C	MARK3	ordinary
SLC4A2	SLC12A7	ordinary
SLC24A1	ATP2B1	ordinary
CHCHD4	TIMM8A	ordinary
RPA3	HSPB1	ordinary
P2RX1	ATP2A3	ordinary
GTF2H2	POLR2D	ordinary
SLC25A16	ALDH6A1	ordinary
HADHB	ACADM	ordinary
ACAT1	PCCA	ordinary
RNF43	FZD8	ordinary
USP1	ERCC4	ordinary
ECT2	RHOF	ordinary
PPP2CB	SPRY2	ordinary
TRPM6	TMOD2	ordinary
PLCH1	DGKA	ordinary
HSD17B12	SRD5A1	ordinary
EHMT2	TBP	ordinary
GNPDA1	PFKL	ordinary
PFKL	ALDOA	ordinary
CHD9	ACOX1	ordinary
HCN3	ATP1A3	ordinary
IRS1	FGFR1OP	ordinary
ERCC6	TAF1B	ordinary
EXOSC9	UTP3	ordinary
TTYH3	SLC26A6	ordinary
CRLS1	PLA2G6	ordinary
RUNX3	LEF1	ordinary
USP4	SHARPIN	ordinary
ARL2	ATP6V1F	ordinary
ARID4B	H3F3A	ordinary
FBXW11	NFKBIA	ordinary
PLBD1	LPCAT3	ordinary
DLC1	RAC2	ordinary
PFAS	GART	ordinary
BTRC	PRLR	ordinary
ERCC3	NCBP2	ordinary
HLA-DQB1	CD247	ordinary
CDKN1A	ORC6	ordinary
GFPT1	GCLM	ordinary
GPR161	PDE3A	ordinary
CCND1	TFDP1	ordinary
SPRED3	RASA3	ordinary
P3H1	COL6A2	ordinary
RANGRF	CAMK2D	ordinary
PPP1R12A	MYH10	ordinary
TRIP10	LRP2	ordinary
SLC35A1	ST6GALNAC6	ordinary
NUP54	FIP1L1	ordinary
CDK6	TFDP2	ordinary
VAPA	MOV10	ordinary
CNOT6L	EIF4B	ordinary
IDH3G	AASS	ordinary
SH3GL1	ADRB2	ordinary
ITPA	NT5C2	ordinary
IMPDH1	GMPS	ordinary
AAK1	ACTR2	ordinary
EXOSC10	WDR75	ordinary
DDIT4	YWHAG	ordinary
RNF111	GTF2H3	ordinary
NT5C2	GUK1	ordinary
ERCC4	TOPBP1	ordinary
ARHGAP10	RHOT2	ordinary
AGPAT2	LPIN2	ordinary
CDK7	TAL1	ordinary
COPS2	FEM1B	ordinary
NEK6	NUP62	ordinary
CEL	ABCA6	ordinary
ABCA10	CH25H	ordinary
CTH	SERINC1	ordinary
MMP7	SPP1	ordinary
PCNA	RAD51AP1	ordinary
GRB2	CSK	ordinary
NFRKB	DDB1	ordinary
SLC35A3	MGAT4B	ordinary
CA13	AQP1	ordinary
GCHFR	PTS	ordinary
PPP3CC	YWHAH	ordinary
ATP2B4	TPM3	ordinary
EXOSC4	DHX37	ordinary
PPP1CB	CSNK1E	ordinary
GTF2H1	NCBP1	ordinary
TYROBP	CD86	ordinary
CAB39L	PRKAA1	ordinary
AP2M1	GRIP1	ordinary
CHMP3	MAP1LC3A	ordinary
PAPSS1	SLC35B3	ordinary
SULT1A1	BPNT1	ordinary
HK2	GYS1	ordinary
SLC12A7	SLC4A2	ordinary
SCARB2	INPP4B	ordinary
LPGAT1	PLA2G4F	ordinary
DENND4B	GDI1	ordinary
METTL14	POLR2B	ordinary
THEM4	ACSF2	ordinary
CTSF	HLA-DPB1	ordinary
HLA-DQA1	LCK	ordinary
NUP85	ALYREF	ordinary
PPARA	CPT1A	ordinary
CCND2	E2F3	ordinary
E2F3	EED	ordinary
INO80C	RAD23A	ordinary
RAB14	EXOC5	ordinary
ATR	DBF4	ordinary
B3GALT6	SDC4	ordinary
HK3	SLC37A2	ordinary
NEURL1B	DLL1	ordinary
PPP2R1B	RBL2	ordinary
PSMC3IP	RPA1	ordinary
DTL	UBE2M	ordinary
PSMB7	ANAPC2	ordinary
DLST	SUCLG1	ordinary
ACADVL	HADHA	ordinary
LCP2	RASGRP2	ordinary
SLC35B4	B4GAT1	ordinary
ACSL3	SPTLC1	ordinary
TBL1X	PEX11A	ordinary
CCS	SOD1	ordinary
SOD1	PRDX1	ordinary
ARL6IP5	TTLL12	ordinary
RAB3GAP2	DYNC1I2	ordinary
PRKACB	GFRA1	ordinary
VAMP7	CLINT1	ordinary
CYB5B	KARS	ordinary
AKT1S1	EIF4EBP1	ordinary
SLC38A9	RARS	ordinary
TCP1	BBS7	ordinary
NIP7	UTP4	ordinary
NAGLU	GUSB	ordinary
GUSB	GLB1	ordinary
FAM120B	LPL	ordinary
ADAMTS3	COL27A1	ordinary
ERAP2	B2M	ordinary
DNAL4	CLTC	ordinary
ACSL4	AGPAT3	ordinary
ADA	GLUL	ordinary
EXOSC6	NOP56	ordinary
ARL2BP	ATP6V0C	ordinary
ATP6V0D1	PYGB	ordinary
HLA-DRA	CD3E	ordinary
DCP1B	LSM2	ordinary
EPHB2	EFNB1	ordinary
MCM4	PRIM1	ordinary
MFSD2A	CAMK2G	ordinary
MID1IP1	ELOVL7	ordinary
CTNNB1	AXIN2	ordinary
CSNK1G2	GSK3B	ordinary
INHBA	ACVR1C	ordinary
KCNAB1	ATP1A1	ordinary
TNFAIP3	TRAF1	ordinary
SSB	POLR3GL	ordinary
UGP2	PPP1R3C	ordinary
WNT9A	LRP6	ordinary
RUVBL1	COPS7A	ordinary
ZDHHC21	NOS3	ordinary
RAB43	GCC1	ordinary
CHST14	BGN	ordinary
PIAS3	MITF	ordinary
NECAP2	AP2M1	ordinary
MAT2B	INMT	ordinary
ALG3	MPDU1	ordinary
PLCB4	TRPC6	ordinary
HGF	CBL	ordinary
DCUN1D2	CUL4A	ordinary
ADCY6	AKAP5	ordinary
CDKN1B	MCM2	ordinary
TAB1	MAP2K7	ordinary
P3H3	COL6A1	ordinary
LDHA	SLC16A1	ordinary
BAG5	HSPA13	ordinary
TULP3	PDE7A	ordinary
PDPN	ITPKA	ordinary
PPARD	ACSL1	ordinary
SLC25A20	CPT1B	ordinary
IKBKG	NFKBIE	ordinary
SLC6A1	SLC12A5	ordinary
SLC4A3	SLC12A6	ordinary
OSBP	SGMS1	ordinary
MTM1	PIP4K2C	ordinary
SARM1	TLR4	ordinary
RUVBL2	DKC1	ordinary
DHFR	CALM3	ordinary
NFKB1	IL18	ordinary
SOCS3	LEPR	ordinary
SPTBN2	BET1	ordinary
CCNF	CUL1	ordinary
PIAS1	SATB2	ordinary
GPAT3	ACSL4	ordinary
HSD17B4	EHHADH	ordinary
RNF2	BMI1	ordinary
CDIPT	PIGQ	ordinary
SPCS2	SEC61G	ordinary
SRSF10	SRSF7	ordinary
MBOAT7	PITPNM1	ordinary
MRS2	PDHX	ordinary
USP21	RNF31	ordinary
FURIN	MMP11	ordinary
JAK2	ZC3HAV1	ordinary
CDC7	MCM7	ordinary
CLTCL1	TACR1	ordinary
TSC2	MLST8	ordinary
PTPN11	IFNAR2	ordinary
SCN4B	SLC4A7	ordinary
NSMCE2	RAD21	ordinary
AGO3	RUNX1	ordinary
NRP1	DPYSL2	ordinary
SEMA4D	RRAS	ordinary
ACAA2	CPT2	ordinary
PSAT1	PSPH	ordinary
KDM1A	HIST1H2AG	ordinary
STON2	PIP5K1B	ordinary
SOCS2	IL7	ordinary
JAK3	IL4R	ordinary
MNAT1	POLR2G	ordinary
MTMR3	PI4KA	ordinary
CLCN6	TTYH3	ordinary
FNBP1	DAB2	ordinary
MAP2K4	MAPK10	ordinary
CBFB	CLDN5	ordinary
GLB1	PSAP	ordinary
P3H2	COL14A1	ordinary
RIMKLA	NAALAD2	ordinary
ADSS	ADSL	ordinary
GSS	GSTM3	ordinary
ACAA1	ACOT8	ordinary
NME2	ADCY4	ordinary
CASK	PPFIA1	ordinary
VCP	HLA-A	ordinary
PLA2G16	LPCAT1	ordinary
PLA2G4C	LPCAT4	ordinary
KRAS	BRAP	ordinary
RFC3	RAD51C	ordinary
AKAP1	TPM2	ordinary
POLD2	RMI2	ordinary
CLCN5	ARHGEF9	ordinary
UBC	RFC3	ordinary
GLUD1	OGDH	ordinary
UBE2V1	TAB3	ordinary
DEGS1	FA2H	ordinary
PIK3R3	ARRB1	ordinary
CCT2	TTC8	ordinary
ZFHX3	CDKN1A	ordinary
SLC8B1	P2RX4	ordinary
CDK5	LMNB1	ordinary
INO80B	COPS6	ordinary
MMS19	ERCC2	ordinary
CATSPERG	ITGA1	ordinary
RHOQ	EXOC4	ordinary
APH1B	DTX4	ordinary
ANKRD27	RAB21	ordinary
NCOR1	NR1D1	ordinary
DYNC1H1	HSP90AA1	ordinary
PTPN22	HLA-DRB1	ordinary
SMURF2	SMAD5	ordinary
IP6K2	IP6K1	ordinary
POLD1	WRN	ordinary
GNL3	PELP1	ordinary
ANO7	SLC6A13	ordinary
CLNS1A	SNRPE	ordinary
SLC39A7	MT1F	ordinary
LPL	APOE	ordinary
PSPH	ORMDL1	ordinary
SPTLC1	AASDHPPT	ordinary
TRPV6	ATP2C2	ordinary
GABPB1	POLG2	ordinary
EXOSC5	UTP14C	ordinary
DTYMK	IFT140	ordinary
CDC73	UBE2B	ordinary
GUCY1A2	PDE1A	ordinary
DHCR24	SREBF2	ordinary
ALDH6A1	PCCB	ordinary
NCSTN	EPHB2	ordinary
ABL1	RAD52	ordinary
PTPRC	HLA-DQA1	ordinary
GALE	NUDT14	ordinary
MMP2	SCUBE3	ordinary
CERS5	DEGS2	ordinary
MAP2K6	BOC	ordinary
SLC35B3	TPST2	ordinary
DYRK1A	LIN54	ordinary
LIN37	CDC6	ordinary
FRAT1	PPP2R5E	ordinary
ATP6V0E2	AK8	ordinary
LRP8	GPC4	ordinary
MTMR14	PIGC	ordinary
MAP2K1	PAPD7	ordinary
DCTD	TYMS	ordinary
HSPH1	HSPA1B	ordinary
DCP1A	LSM3	ordinary
AP2S1	ROR1	ordinary
PAFAH1B3	CAPZB	ordinary
PARP9	NAMPT	ordinary
ACTR1B	DCTN2	ordinary
PTPN1	STAT2	ordinary
PIKFYVE	MTMR2	ordinary
MMP9	COL16A1	ordinary
PIGW	HDAC6	ordinary
RPS19BP1	SIRT1	ordinary
LPIN3	DGAT2	ordinary
HSP90AB1	CD9	ordinary
ETFDH	ETFA	ordinary
EPHA1	EFNA5	ordinary
ACOT4	SLC27A2	ordinary
VNN2	PANK3	ordinary
PANK4	PPCS	ordinary
NEK7	NDC1	ordinary
MUS81	KAT5	ordinary
MB21D1	TMEM173	ordinary
PLD4	PITPNM2	ordinary
GTF2H5	POLR2L	ordinary
ZCCHC11	EIF4A1	ordinary
GNAO1	ITPR2	ordinary
BOP1	UTP20	ordinary
SHMT2	AMT	ordinary
XIAP	TLE3	ordinary
IL2RG	IL2RB	ordinary
GEN1	BARD1	ordinary
ZMYM2	SOS1	ordinary
TOMM7	BCS1L	ordinary
ROCK2	PPP1CB	ordinary
OAT	ABAT	ordinary
GPT2	ALDH18A1	ordinary
CAMK2D	MYO6	ordinary
ARAF	MACF1	ordinary
PNPO	GPX1	ordinary
PPP1R12B	MYH9	ordinary
GMPR2	ADSS	ordinary
CTR9	UBE2A	ordinary
PSEN2	EPHB3	ordinary
EPHB1	EFNB3	ordinary
ANK1	TMED9	ordinary
UBE2T	RPA2	ordinary
GGT6	NCALD	ordinary
DLG3	SLC8A1	ordinary
MED1	RGL1	ordinary
STAT2	STAT1	ordinary
HDAC2	BRD7	ordinary
OSTM1	ANO1	ordinary
VAV2	ITPR3	ordinary
MMP16	MMP14	ordinary
NDST1	IMPAD1	ordinary
PTPN3	STAM	ordinary
ACSL5	ORMDL3	ordinary
MSRB2	MAT2A	ordinary
CLOCK	CRY1	ordinary
GFPT2	GNPDA1	ordinary
GGT7	DLG3	ordinary
EPAS1	HIGD1A	ordinary
LY96	IRF7	ordinary
LAMTOR1	RPS6KB1	ordinary
ABCB8	HMOX2	ordinary
GPX8	P4HB	ordinary
DENND1C	RAB8B	ordinary
TOMM22	ATP5G1	ordinary
GIT1	MYL12A	ordinary
ADIPOR1	MLXIPL	ordinary
RAE1	CPSF1	ordinary
RAB33B	MAN1A2	ordinary
BIN1	WNT5A	ordinary
HADH	ACAT1	ordinary
PMM1	GMPPB	ordinary
GMPPA	DPM3	ordinary
NUP37	SMN1	ordinary
IL6ST	STAT3	ordinary
PIGN	CEPT1	ordinary
PNPLA2	AQP3	ordinary
HDAC7	PML	ordinary
SUMO1	CDCA8	ordinary
PLXNA1	CDK5	ordinary
BAG3	HSPA6	ordinary
LRP1	SDC3	ordinary
ADAM10	JAG1	ordinary
CDH1	SRC	ordinary
CLCN4	BEST1	ordinary
CHSY1	DCN	ordinary
TRAPPC1	RAB1B	ordinary
PNPLA4	DGAT1	ordinary
ATP1A1	ABCC9	ordinary
HOXA1	NCOA6	ordinary
GABARAPL1	ATG3	ordinary
TRMT112	GSPT1	ordinary
HEXB	NEU1	ordinary
EPS15	VAMP7	ordinary
KIF20A	HLA-DRB5	ordinary
DDX6	LSM7	ordinary
LRP12	GPC6	ordinary
NELFCD	RAD51D	ordinary
ATG16L1	GABARAP	ordinary
POU5F1	SALL1	ordinary
GABPA	MTERF1	ordinary
CBX8	CETN2	ordinary
SLC22A5	SLC9A7	ordinary
NOD1	MAP2K3	ordinary
NOL12	SNU13	ordinary
IGF1	IRS1	ordinary
ACVR2B	BMPR1A	ordinary
SLC6A9	ANO5	ordinary
FAAH	PTGS2	ordinary
PTGS2	PTGS1	ordinary
XRN1	LSM4	ordinary
XYLT2	SDC1	ordinary
TAB2	GFAP	ordinary
HBS1L	PPAT	ordinary
GMPR	DPH6	ordinary
LTB	BIRC3	ordinary
RCHY1	RFC1	ordinary
CH25H	RXRA	ordinary
RBBP4	ING5	ordinary
HSP90AA1	CYGB	ordinary
BEST1	CA12	ordinary
TFRC	ARPC4	ordinary
TNRC6B	NLK	ordinary
CDK2	MCM4	ordinary
IDH2	AADAT	ordinary
MICAL1	GSTP1	ordinary
TIRAP	IRAK2	ordinary
SPTBN5	YKT6	ordinary
EXOSC7	IMP4	ordinary
WWP1	SCNN1G	ordinary
CCT3	BBS5	ordinary
CAB39	PRKAB2	ordinary
ST13	HSPA9	ordinary
PAPPA2	IGFBP4	ordinary
SLC38A2	CTPS2	ordinary
LYN	CD22	ordinary
PHYKPL	ALDH7A1	ordinary
MBTPS2	CREB3L2	ordinary
FXN	GPT2	ordinary
FANCM	FANCD2	ordinary
SLC36A4	WARS	ordinary
ADAMTS2	COL1A2	ordinary
ABHD6	AQP9	ordinary
IFNAR1	JAK1	ordinary
JAK1	IL7R	ordinary
HRASLS5	GDPD3	ordinary
SCNN1A	CAMK2B	ordinary
ARHGEF17	RHOBTB2	ordinary
PLD3	LIPH	ordinary
RAPGEF3	RAP1B	ordinary
IDH3B	SLC25A11	ordinary
NFYC	TM7SF2	ordinary
ABCA5	ABCA9	ordinary
SIGIRR	TLR1	ordinary
TP53BP2	BAX	ordinary
PLCD4	SYNJ1	ordinary
GFRA1	RET	ordinary
STAT6	SOCS1	ordinary
PPP2R3B	RB1	ordinary
XRN2	WDR36	ordinary
CTSS	HLA-B	ordinary
CLIC2	ANXA2	ordinary
LRP10	AGRN	ordinary
CNOT1	EIF4G1	ordinary
ANK3	TMED7	ordinary
FBXL18	FBXL7	ordinary
MYC	MAPKAPK5	ordinary
MAOA	PRDX2	ordinary
ACTR8	COPS4	ordinary
LMAN1	SEC24B	ordinary
ACOT2	GCAT	ordinary
ARHGAP9	RHOG	ordinary
RPA1	HSPH1	ordinary
PDHA1	NAGS	ordinary
BCAT2	ADHFE1	ordinary
GCGR	GNG5	ordinary
MIB1	DLL4	ordinary
ITPR1	TTN	ordinary
AASS	GOT2	ordinary
ST6GALNAC6	SLC35A1	ordinary
AK9	WDR35	ordinary
CBLB	NCK1	ordinary
CLCN3	ANO6	ordinary
MAN1C1	MGAT1	ordinary
NR1D1	NPAS2	ordinary
SEC16A	COL7A1	ordinary
POLE2	RBBP8	ordinary
LRAT	RBP1	ordinary
CIT	MYL9	ordinary
MCCC1	CA5B	ordinary
PRKAB1	TBC1D1	ordinary
EDC3	LSM6	ordinary
CNOT11	EIF4A3	ordinary
ITGAV	VEGFA	ordinary
CHPT1	PAFAH1B1	ordinary
CIAO1	NUBP1	ordinary
TFDP1	FBXO5	ordinary
SYN1	RAB3A	ordinary
TSPO	FDXR	ordinary
NLK	TCF7L2	ordinary
COMMD4	NEDD8	ordinary
ATP1A2	KCNK5	ordinary
RIPK3	TICAM1	ordinary
CNOT7	EIF4E	ordinary
DLAT	CS	ordinary
PTPN18	ERBB2	ordinary
POLB	PARP1	ordinary
RBL1	CDK1	ordinary
RNF185	CFTR	ordinary
PLCH2	DGKQ	ordinary
FTSJ3	UTP18	ordinary
ALS2CL	RAB5C	ordinary
DNAJC7	HSPA4	ordinary
NFIX	POLR1C	ordinary
PRDX6	GSR	ordinary
CYP51A1	MSMO1	ordinary
EFNA4	VAV2	ordinary
PSENEN	DTX2	ordinary
PPIA	NFATC2	ordinary
ACOT1	AACS	ordinary
SH3KBP1	PIK3CD	ordinary
AGO2	MYC	ordinary
PARG	FEN1	ordinary
CARD11	IKBKG	ordinary
APBA1	STXBP1	ordinary
LIN7C	STX1A	ordinary
MED31	PCK1	ordinary
DOLPP1	DPM1	ordinary
NUDT4	NUDT3	ordinary
REEP1	GNB1	ordinary
CLIP3	XIAP	ordinary
TMED2	SEC24D	ordinary
MBOAT2	PEMT	ordinary
COPS7A	DTL	ordinary
CDK4	E2F4	ordinary
RNF4	BABAM1	ordinary
EP400	UBN1	ordinary
SPHK1	PLPP1	ordinary
REEP6	OR51E1	ordinary
TRAPPC8	RAB1A	ordinary
IRAK2	MAP2K6	ordinary
C9	C8G	ordinary
SMC6	STAG1	ordinary
PSME2	RNF146	ordinary
CREBBP	MRPL18	ordinary
SUMF1	ARSD	ordinary
SHB	BCAR1	ordinary
MVD	IDI1	ordinary
IDI1	FDPS	ordinary
CSNK2B	NCAPG	ordinary
RIN1	GDI2	ordinary
SUPT16H	ATM	ordinary
GATAD2B	TAF1A	ordinary
ERCC2	POLR2E	ordinary
PRCP	KLKB1	ordinary
PHLPP2	AKT1	ordinary
MDC1	TP53BP1	ordinary
TPI1	GPD1L	ordinary
PITPNM3	PLA2R1	ordinary
RIPK1	CASP10	ordinary
MAPKAPK2	ZFP36	ordinary
PIP4K2B	SNX9	ordinary
PPP1R13B	BBC3	ordinary
FAS	RIPK3	ordinary
SLC39A6	C1QBP	ordinary
PRMT1	HDAC1	ordinary
ERAP1	PDIA3	ordinary
E2F5	CCNA2	ordinary
MYBL2	CCNB2	ordinary
CD274	HLA-DRA	ordinary
AMER1	CTNNB1	ordinary
AGBL2	LRRC49	ordinary
EGF	SPRY1	ordinary
KDR	ROCK2	ordinary
NAA38	SLC27A5	ordinary
SAV1	LATS2	ordinary
CNOT8	PAIP1	ordinary
CHD3	EP300	ordinary
CACNB2	ORAI1	ordinary
PRKCE	SHC1	ordinary
HSD17B7	EBP	ordinary
MMP19	LAMC2	ordinary
PTGS1	PTGDS	ordinary
ARHGAP30	RHOH	ordinary
PAXIP1	DCLRE1C	ordinary
MCEE	MUT	ordinary
TRPC4AP	ITGB5	ordinary
PSMA3	CDC26	ordinary
VEGFA	ROCK1	ordinary
RORA	SREBF1	ordinary
RAD51C	CDK4	ordinary
COMT	BHMT2	ordinary
NFYA	HSPA5	ordinary
MCM2	POLA1	ordinary
MFNG	NOTCH4	ordinary
PITPNM1	PI4K2B	ordinary
GLS	OAT	ordinary
ADAM17	NGFR	ordinary
ALG12	ALG9	ordinary
B4GALT1	OGN	ordinary
KDSR	CERS6	ordinary
HCK	FCGR2A	ordinary
CDA	RHCG	ordinary
B3GLCT	SPON1	ordinary
SMC4	NCAPG2	ordinary
MAPKAP1	SGK1	ordinary
ACLY	NAA35	ordinary
RDH10	DHRS3	ordinary
FZR1	MCM3	ordinary
SLC25A18	GLUD1	ordinary
CAPN1	FLG	ordinary
TAX1BP1	TRADD	ordinary
PIGB	PIGO	ordinary
PIGF	PIGK	ordinary
PLK1	CDCA5	ordinary
MMP11	MMP1	ordinary
SERPINB6	PLAU	ordinary
YES1	PECAM1	ordinary
DRAP1	SMAD2	ordinary
CAD	RIMKLB	ordinary
POM121	GEMIN5	ordinary
GNA14	INPP5A	ordinary
MGLL	PLD3	ordinary
CA2	ATP6AP1	ordinary
CENPE	HLA-DPA1	ordinary
CHST15	CSPG4	ordinary
MMAA	SUCLG2	ordinary
OXCT1	SDHA	ordinary
AGL	SLC2A6	ordinary
NFIA	POLR1D	ordinary
MAP3K11	ARAF	ordinary
TECR	SCD5	ordinary
SLC26A2	PAPSS1	ordinary
CD3EAP	HIST1H2BC	ordinary
MBOAT1	PLA2G4C	ordinary
MUT	ALAS1	ordinary
IL2RB	STAT5A	ordinary
ABCA1	CPNE3	ordinary
PDE1B	AK2	ordinary
PLPP5	PRKCE	ordinary
RB1CC1	PIK3C3	ordinary
GNE	NANS	ordinary
CD180	LY96	ordinary
NMT2	ACSS2	ordinary
FAM96B	POLD1	ordinary
OPHN1	RHOT1	ordinary
RPIA	PRPS1	ordinary
PRPS1	NAPRT	ordinary
NARFL	RTEL1	ordinary
SLC25A26	MRM1	ordinary
MCCC2	AUH	ordinary
NADK2	MCCC2	ordinary
DPM2	PIGL	ordinary
HAGH	GSTA4	ordinary
CUL1	MAP3K8	ordinary
FDX1	CYP11A1	ordinary
TOMM5	CYC1	ordinary
KCNK6	FXYD3	ordinary
MAPK9	JUN	ordinary
USP9X	SNCA	ordinary
FGFBP3	FGF7	ordinary
OCRL	MTMR1	ordinary
PPARG	CD36	ordinary
PTP4A2	RABGGTA	ordinary
ATF4	HERPUD1	ordinary
SEPT7	CDC42EP5	ordinary
SLC24A2	TRPV6	ordinary
C2CD5	MYO1C	ordinary
CACNA1D	CATSPER2	ordinary
GBA2	HK1	ordinary
POLD3	RPA3	ordinary
L2HGDH	DLST	ordinary
BAZ1B	H2AFV	ordinary
STRADB	PRKAG2	ordinary
RAB10	EXOC2	ordinary
RANGAP1	INCENP	ordinary
PCOLCE	COL3A1	ordinary
LOXL1	MFAP2	ordinary
C9orf3	AZIN2	ordinary
HCFC1	TFB2M	ordinary
INMT	AHCY	ordinary
SENP1	SUMO3	ordinary
ZRANB1	TRAF6	ordinary
SUPT4H1	GTF2B	ordinary
GNAQ	DGKH	ordinary
MED27	CEBPA	ordinary
MVB12A	UBA52	ordinary
PORCN	WNT2	ordinary
MAML3	HES1	ordinary
CCNB2	CENPM	ordinary
ALG10B	MAGT1	ordinary
SDHB	FH	ordinary
ORC5	POLE3	ordinary
AOC3	GPX3	ordinary
PDK3	PDHA1	ordinary
RGS2	GNA14	ordinary
PPP2R2A	FOXM1	ordinary
TOMM20	ATP5A1	ordinary
B3GAT3	GPC3	ordinary
AQR	ERCC6	ordinary
GGCT	CARS	ordinary
EDC4	LSM5	ordinary
SPTLC2	KDSR	ordinary
PPA1	PNP	ordinary
AAAS	SNRPD2	ordinary
ACOT8	SCP2	ordinary
MCM3	PRIM2	ordinary
SLC2A1	B4GALT1	ordinary
TSC1	MTOR	ordinary
PDK2	DLD	ordinary
ACOT13	HDAC8	ordinary
BBS12	BBS9	ordinary
MBTPS1	ATF6	ordinary
BCR	BAIAP2	ordinary
RPS6KA4	L1CAM	ordinary
EFNA5	VAV3	ordinary
ACSS1	HMGCS2	ordinary
TNFRSF10A	TNFRSF10D	ordinary
ATP6V0B	UPP1	ordinary
RANBP1	RAN	ordinary
SETD1A	ITGA2B	ordinary
STUB1	CDC37	ordinary
ADK	CMPK1	ordinary
TBC1D15	RAB7B	ordinary
CBX2	SUMO1	ordinary
CHRM3	GNAQ	ordinary
PSMD7	KLHL12	ordinary
FECH	ABCB7	ordinary
ABCB10	FLVCR1	ordinary
RNF216	TRIM25	ordinary
PLAT	PDGFC	ordinary
PSMB8	TNFSF13B	ordinary
PIK3C2B	FNBP1L	ordinary
POM121C	KPNA1	ordinary
CATSPER2	MYL5	ordinary
SLC39A1	S100A9	ordinary
OPTN	PLK1	ordinary
YME1L1	SMDT1	ordinary
MYD88	CYFIP1	ordinary
DDX41	IRF3	ordinary
ABHD12	PLD1	ordinary
LIN54	RBL1	ordinary
HMGB1	DFFB	ordinary
PITPNM2	PI4K2A	ordinary
RGS19	GNA15	ordinary
SEC11C	SSR2	ordinary
PPA2	SUCLA2	ordinary
GGCX	VKORC1L1	ordinary
PLD6	TRIAP1	ordinary
LRRFIP1	NCKAP1	ordinary
GCNT4	MUC15	ordinary
ATP6V0A2	ABCC4	ordinary
FGF7	INPP5K	ordinary
TLR1	SNAP23	ordinary
ACOX1	CAT	ordinary
HEXA	CTSA	ordinary
PHC1	HNRNPK	ordinary
STRADA	PRKAB1	ordinary
STK4	MOB1B	ordinary
RPE	PPP2CB	ordinary
UBQLN2	AAK1	ordinary
OTULIN	UBC	ordinary
TSR3	MTAP	ordinary
INPP4B	MTMR9	ordinary
DNAJC2	HSPA14	ordinary
PINK1	MTERF3	ordinary
AXIN1	LRP5	ordinary
BRAF	KIAA1549	ordinary
AGPAT5	PRELID3A	ordinary
SMPD3	SGMS2	ordinary
PCK2	SLC25A1	ordinary
POLR1C	HIST1H2AE	ordinary
LY86	CD14	ordinary
CCT5	BBS4	ordinary
SPCS3	RPN2	ordinary
VAMP3	PLIN3	ordinary
RPTOR	ULK1	ordinary
ALDOC	GPD1	ordinary
SREBF2	ELOVL6	ordinary
IDO1	AFMID	ordinary
KLF4	CEBPB	ordinary
TRRAP	TCF4	ordinary
WDR20	AR	ordinary
PGM1	SLC37A4	ordinary
MAGT1	MMGT1	ordinary
ZFYVE9	SMAD3	ordinary
WRN	REV3L	ordinary
MRGBP	HIST1H2AC	ordinary
SLC12A2	KCNAB1	ordinary
PPP2R5A	PDPK1	ordinary
CAMKMT	CALM2	ordinary
ITGA2	MET	ordinary
NUP205	HDAC4	ordinary
FAR1	AGPS	ordinary
CDC25A	CCNE1	ordinary
PCCB	MCEE	ordinary
PMM2	GMPPA	ordinary
METAP1	MAT2B	ordinary
PNPLA7	GDPD5	ordinary
PCOLCE2	COL5A2	ordinary
VPS72	HIST3H2A	ordinary
KCNQ1	FXYD6	ordinary
PSMA7	TPP2	ordinary
FANCA	UBE2T	ordinary
CSNK1A1	APC	ordinary
PDPK1	RPS6KA3	ordinary
RGS10	GNAI1	ordinary
SCN1B	DLG4	ordinary
SOD2	PRDX5	ordinary
PCSK5	GPIHBP1	ordinary
AGBL5	TTLL1	ordinary
DCP2	PATL1	ordinary
STARD13	RHOC	ordinary
PIP5K1A	PIK3CA	ordinary
GSK3B	PLXNA1	ordinary
TTL	TUBB6	ordinary
ATP1A3	HCN3	ordinary
PIGO	PIGS	ordinary
NUDT5	TKT	ordinary
RING1	CBX4	ordinary
MAPK6	CDC42EP3	ordinary
EVC	SUFU	ordinary
PDGFA	PDGFRA	ordinary
FGF13	AHCYL2	ordinary
UBE2L6	ISG15	ordinary
PDGFRA	BAG4	ordinary
NUP50	CPSF3	ordinary
MCOLN1	ACTG2	ordinary
LDHB	BSG	ordinary
SLC16A1	HCAR1	ordinary
LAMTOR3	AIMP1	ordinary
SLC39A3	S100A8	ordinary
C4B	C4A	ordinary
TRAPPC11	CHML	ordinary
CYB5R4	FTH1	ordinary
VTA1	CHMP4C	ordinary
AK2	SLC25A5	ordinary
CDC42	KNTC1	ordinary
PPP1CC	CSNK1D	ordinary
FEN1	POLD3	ordinary
SERPINA5	VWF	ordinary
TREM2	MYO18A	ordinary
PPARGC1A	ESRRA	ordinary
GPSM1	GPER1	ordinary
ATAT1	SLC33A1	ordinary
ESD	MGST2	ordinary
POLR2J	EPAS1	ordinary
RHOC	PPP1R12B	ordinary
SLC1A1	TTLL11	ordinary
KIF4A	HLA-DQA2	ordinary
SPIDR	XRCC2	ordinary
MRM1	SLC25A26	ordinary
SYNJ2	MTMR6	ordinary
FAM20A	MEN1	ordinary
NFS1	MOCS3	ordinary
ATF6	HSP90B1	ordinary
EBF1	PPARG	ordinary
PSEN1	CDH1	ordinary
BMPR2	BMPR1B	ordinary
CSGALNACT2	VCAN	ordinary
ARHGAP11A	RHOA	ordinary
SOCS1	TLR2	ordinary
DLD	GCSH	ordinary
IRAK3	TOLLIP	ordinary
IRAK4	PELI2	ordinary
ANKRD28	SEC24A	ordinary
METAP2	DARS	ordinary
CRAT	NUDT7	ordinary
PACSIN2	TGOLN2	ordinary
B3GNTL1	MUC20	ordinary
IRAK1	PELI3	ordinary
INPP5E	PLEKHA8	ordinary
RAD18	PCNA	ordinary
BIRC3	RIPK2	ordinary
SOS2	RHOBTB1	ordinary
CACNA2D3	MYL12B	ordinary
TEC	RASGRP1	ordinary
IL10RA	TYK2	ordinary
KL	KLB	ordinary
MLYCD	CRAT	ordinary
SPINT1	MST1	ordinary
RICTOR	AKT3	ordinary
JUN	IGFBP7	ordinary
XRCC5	PRKDC	ordinary
ALAS1	ACSF3	ordinary
DDX21	TEX10	ordinary
PNPLA8	MBOAT1	ordinary
LCK	TYROBP	ordinary
TFG	SEC13	ordinary
NRIP1	ARNTL	ordinary
DENND2A	RAB9A	ordinary
SLC22A15	AKAP9	ordinary
PPM1K	DBT	ordinary
TKT	PFKP	ordinary
GOLGA2	GORASP1	ordinary
MYLK	MYH14	ordinary
STK11	PRKAA2	ordinary
CCNA2	MCM6	ordinary
LPIN1	PNPLA2	ordinary
E2F4	CDC25A	ordinary
SLC30A6	SOD3	ordinary
CASP7	VIM	ordinary
B4GALT3	FMOD	ordinary
ATG101	DYNLL2	ordinary
SEL1L	RPS27A	ordinary
ANOS1	FGFR1	ordinary
ABCA2	SULT2B1	ordinary
PDE4D	AMPD3	ordinary
DCUN1D5	UBE2F	ordinary
ADCY4	PDE8A	ordinary
SUOX	PRDX3	ordinary
GLA	GLB1L	ordinary
ABCA3	ADRA2C	ordinary
ACVR2A	ACVR1B	ordinary
ARPC2	VAMP3	ordinary
LAMA4	HGF	ordinary
PRKAG1	ATG101	ordinary
MLST8	MAF1	ordinary
RACGAP1	HLA-DQB1	ordinary
STEAP3	MCOLN1	ordinary
PYCR2	PARS2	ordinary
GOT2	DARS2	ordinary
CNDP2	NFS1	ordinary
ANO5	SLC6A9	ordinary
PICALM	VAMP2	ordinary
NUP88	GEMIN4	ordinary
TAF10	HIST1H2BN	ordinary
F8	F10	ordinary
TLL1	LOXL3	ordinary
CAMK2G	EPB41L1	ordinary
NCALD	SRI	ordinary
TRPC3	CNGB1	ordinary
VKORC1L1	GGCX	ordinary
PAH	YARS	ordinary
EBNA1BP2	LAS1L	ordinary
WDR35	PDE8B	ordinary
LIN9	TOP2A	ordinary
ACACA	ELOVL4	ordinary
CNGB1	TCAP	ordinary
SLC25A37	LYRM4	ordinary
HMOX2	BLVRB	ordinary
LAMC2	PTK2	ordinary
GMPPB	GMDS	ordinary
ARFGAP1	KDELR3	ordinary
PACSIN3	AGTR1	ordinary
BCAT1	EGLN3	ordinary
DHX9	RELA	ordinary
PDE2A	GMPR2	ordinary
TRIB3	AKT2	ordinary
ATP6V1H	SLC25A4	ordinary
IL12RB1	STAT4	ordinary
ABCB7	ABCG2	ordinary
SGK1	MDM2	ordinary
ADCY1	PDE4D	ordinary
AMDHD2	GNPNAT1	ordinary
TPX2	TP53	ordinary
SPTB	COPZ1	ordinary
CAMK2B	IFNGR2	ordinary
CALM3	TRPM2	ordinary
USP33	CCP110	ordinary
CASP6	SATB1	ordinary
ESCO1	PDS5A	ordinary
ALOX12	GPX4	ordinary
DUSP7	MAPK7	ordinary
RIMS1	HSPA8	ordinary
PIP5K1C	TREM2	ordinary
MAP2K3	MAPKAPK3	ordinary
MAP2K2	AGGF1	ordinary
THRSP	ELOVL1	ordinary
TSC22D3	SCNN1B	ordinary
ITPR2	DMD	ordinary
DYNC2H1	GLI3	ordinary
TIAM1	RHOU	ordinary
CDK5R1	CDC25B	ordinary
PRKACA	LIPE	ordinary
ALG9	ALG6	ordinary
ST5	RAB13	ordinary
IL27RA	JAK2	ordinary
TIMM50	FXN	ordinary
GPAM	AGPAT5	ordinary
CPLX1	GAD1	ordinary
STK3	MOB1A	ordinary
CFLAR	TNFSF10	ordinary
C1QA	C2	ordinary
GRIK3	SLC8B1	ordinary
ANKLE2	BANF1	ordinary
ATG4A	GABARAPL1	ordinary
TLR3	MAP3K7	ordinary
RRAGD	NOS2	ordinary
EPHB4	EFNB2	ordinary
PDZD11	HLCS	ordinary
C4A	C4B	ordinary
DDX58	CASP8	ordinary
WTIP	HIF3A	ordinary
BMP1	LOXL2	ordinary
LOXL2	PXDN	ordinary
WTAP	POLR2H	ordinary
GPCPD1	ETNK2	ordinary
ANO10	SLC6A12	ordinary
A2M	RHOB	ordinary
UBE2D2	TLR3	ordinary
SACM1L	ARF3	ordinary
UBE2M	FBXW11	ordinary
MAPKAPK5	KALRN	ordinary
SYDE2	RHOD	ordinary
ATP6V1E1	NME1	ordinary
IL4R	STAT6	ordinary
SLC25A28	ISCU	ordinary
TSNAX	AGO2	ordinary
IVD	MCCC1	ordinary
SLC2A8	ARPC1B	ordinary
CSGALNACT1	CSPG5	ordinary
GMPS	TTLL5	ordinary
ABCD1	PIGA	ordinary
IFT122	PDE7B	ordinary
PRDX5	TXN2	ordinary
ANAPC16	FZR1	ordinary
POMGNT2	DAG1	ordinary
GAMT	CKMT1B	ordinary
MTRR	FPGS	ordinary
[truncated: 404 more rows]

## Sheet: KIRC
gene1	gene2	type
PMM2	GMPPB	critical
PMM1	GMPPA	critical
ITGA4	ITGAL	critical
ITGAL	ITGA4	critical
ABAT	ALDH5A1	critical
APIP	ENOPH1	critical
KMT5A	PHF8	critical
CYP27B1	CYP24A1	critical
SRM	DHPS	critical
EIF2AK3	EIF2S1	critical
MPDU1	ALG6	critical
PIGL	PIGW	critical
EBP	SC5D	critical
PECR	PHYH	critical
PTPMT1	CRLS1	critical
SRD5A3	DOLK	critical
CRYM	PIPOX	critical
PMVK	MVD	critical
RNF152	RRAGA	critical
SLC17A3	SLC22A12	critical
CTSK	MMP7	critical
CTSD	COL18A1	critical
HVCN1	DUOX1	critical
HAAO	ACMSD	critical
NANS	NANP	critical
NMNAT2	NADSYN1	critical
AGXT	DAO	critical
SLC44A1	CHDH	critical
COQ2	COQ6	critical
CLTB	ROR1	critical
IDUA	SGSH	critical
HIPK2	CBFB	critical
APOB	PECAM1	critical
PGLS	PGD	critical
ATP7A	ATOX1	critical
MTHFD2	MTHFD2L	critical
ADSL	ATIC	critical
RALGDS	RALB	critical
AURKA	PHLDA1	critical
LCMT1	PPP2R2A	critical
AFMID	KMO	critical
CYP46A1	CYP39A1	critical
NAT8	BACE1	critical
SLC25A10	MDH1	critical
MMAB	MUT	critical
ALG9	ALG12	critical
ALG2	ALG11	critical
ALG3	MPDU1	critical
ALG6	ALG8	critical
NRF1	TFAM	critical
PHYH	HACL1	critical
AZIN2	AGMAT	critical
KIT	SH2B2	critical
CRK	KIDINS220	critical
LGMN	TLR7	critical
PKN1	PPP1R14A	critical
G6PD	PGLS	critical
ALAD	HMBS	critical
PDXK	PNPO	critical
MTAP	APRT	critical
GMDS	TSTA3	critical
LSS	CYP51A1	critical
RPS6KA5	ATF1	critical
METTL22	KIN	critical
DMGDH	SARDH	critical
NSDHL	HSD17B7	critical
COX10	COX15	critical
PIGV	PIGB	critical
TJP1	GJA1	critical
TOR1A	STON1	critical
TOR1B	STON2	critical
TRIM21	DDX41	critical
DENND3	RAB12	critical
ZNF385A	SFN	critical
MAPK10	JUN	critical
PPCS	PPCDC	critical
ATF2	MSH2	critical
SLC27A2	AMACR	critical
TMEM55B	ING2	critical
AMD1	SMS	critical
LIAS	MARS2	critical
PRKCZ	SPHK1	critical
CTSB	COL15A1	critical
PCYT1A	CHPT1	critical
LIPT1	DHTKD1	critical
DTX4	ZBP1	critical
HPGDS	AKR1C3	critical
TIMP2	MMP2	critical
ECI1	MECR	critical
FADS1	ELOVL5	critical
CARNS1	CARNMT1	critical
USP10	SNX3	critical
USP19	RNF123	critical
BAP1	HCFC1	critical
MST1	MST1R	critical
MTHFD1L	MTFMT	critical
CAT	NUDT12	critical
ARSA	GALC	critical
PROS1	F5	critical
HYKK	PHYKPL	critical
NAE1	UBA3	critical
TSPO	FDX1	critical
TGFB1	ZFHX3	critical
RUNX2	LGALS3	critical
ESR1	KCTD6	critical
MSMO1	NSDHL	critical
DCPS	NT5C3B	critical
AMY2B	MGAM	critical
MAN2B2	MANBA	critical
MAN2B1	MAN2B2	critical
AKR1A1	CRYL1	critical
AMT	SHMT2	critical
HMBS	UROS	critical
PUM2	DCUN1D3	critical
BPHL	VARS	critical
FGR	LRP8	critical
DHODH	UMPS	critical
ZBED1	CHD3	critical
CDS2	PGS1	critical
ESRRA	PERM1	critical
PPME1	PPP2R3B	critical
SQLE	LSS	critical
FOXM1	CENPF	critical
SH2B1	GHR	critical
DPYD	DPYS	critical
DPYS	UPB1	critical
PCK2	SLC25A1	critical
IGF2	IGF1R	critical
NUDT3	NUDT4	critical
NUDT4	NUDT3	critical
GLO1	HAGH	critical
HIF1A	RORA	critical
SLC31A1	ATP7B	critical
CHEK1	WEE1	critical
CS	ACO2	critical
CP	HEPH	critical
PTS	SPR	critical
SAE1	UBA2	critical
CHKB	PCYT1A	critical
ERBB4	CXCL12	critical
CERK	CPTP	critical
ATG12	ATG10	critical
CPT2	ACADVL	critical
PGM3	UAP1	critical
MAPK9	ATF2	critical
STAT5B	BRWD1	critical
PPCDC	COASY	critical
HCFC1	TFB2M	critical
FDX1	FDXR	critical
MMP15	NID1	critical
CPOX	PPOX	critical
ALG11	RFT1	critical
ALG12	ALG9	critical
CDC25B	CDK2	critical
AGXT2	HIBADH	critical
AMACR	ACOX2	critical
GPHN	MOCOS	critical
SLC22A2	MAOA	critical
CASP7	GAS2	critical
MYC	MAPKAPK5	critical
ENTPD1	ENTPD8	critical
ENTPD8	ENTPD1	critical
GNPNAT1	PGM3	critical
PDSS2	COQ2	critical
DEGS2	ACER3	critical
ALDH9A1	BBOX1	critical
UROS	UROD	critical
SERPINE2	VWF	critical
ZDHHC2	CKAP4	critical
SMS	SAT1	critical
CFI	CR1	critical
F5	F8	critical
GSTZ1	FAH	critical
HGS	STAM2	critical
HGD	GSTZ1	critical
BACE1	APP	critical
ADORA2A	NTRK2	critical
CSK	PDCD1	critical
RANBP10	RANBP9	critical
MCEE	MMAA	critical
HACL1	ALDH3A2	critical
GART	PFAS	critical
SC5D	DHCR7	critical
ENOPH1	ADI1	critical
PGAM5	FUNDC1	critical
DPAGT1	ALG13	critical
SEPHS2	SEPSECS	critical
PCBD1	QDPR	critical
OTUB1	RNF128	critical
PRMT3	RPS2	critical
SLC25A1	ACO1	critical
HMGCR	MVK	critical
ACADM	DECR1	critical
USP45	ERCC1	critical
USP47	POLB	critical
PPARGC1B	ATP5B	critical
SLC6A18	TTLL3	critical
GALT	GALE	critical
HMGCS1	HMGCR	critical
HMGCS2	HMGCL	critical
SORD	XYLB	critical
ALDH1A1	GLYCTK	critical
HPD	HGD	critical
ACO1	IDH1	critical
TRAF6	ITGB3BP	critical
MOCS2	GPHN	critical
MOCS1	MOCS2	critical
JAK3	IL4R	critical
EIF2S1	ATF4	critical
KITLG	KIT	critical
SLC2A5	KHK	critical
ECHS1	HADH	critical
ADHFE1	D2HGDH	critical
ALOX12	GPX4	critical
SH2D2A	AXL	critical
RGP1	RAB6B	critical
ST8SIA4	NCAM1	critical
PGS1	PTPMT1	critical
ELOVL5	ELOVL2	critical
ELOVL2	FADS2	critical
ELOVL1	FADS1	critical
MTF1	CSRP1	critical
TBC1D16	RAB4A	critical
NPM1	NOP2	critical
RIC1	RAB6A	critical
LRP2	CUBN	critical
USP28	CLSPN	critical
ECSIT	MAP3K1	critical
RENBP	NAGK	critical
UPP1	DPYD	critical
GLRX3	ALAD	critical
CYBRD1	SLC11A2	critical
MTHFD2L	MTHFD2	critical
RNF144A	UBE2L3	critical
OMA1	OPA1	critical
GCLM	GSS	critical
GCLC	GGCT	critical
VCPKMT	VCP	critical
GRB10	INSR	critical
CBL	TGFBR2	critical
YAP1	ITCH	critical
RFT1	ALG3	critical
HPSE	IDUA	critical
CYB5R3	CYB5A	critical
USP8	LRIG1	critical
USP7	FOXO4	critical
TOMM40	PINK1	critical
PPRC1	TFB1M	critical
MAN2A2	MGAT2	critical
RWDD3	SAE1	critical
COL18A1	MMP9	critical
ALDOB	TKFC	critical
PHGDH	PSAT1	critical
ENPP1	ACP5	critical
HDAC8	NAA38	ordinary
SLC26A6	ANO9	ordinary
EP300	TNFRSF21	ordinary
DNAJB6	HSPA2	ordinary
AGPAT1	HDAC6	ordinary
PPAT	SLC7A11	ordinary
HDAC6	MID1IP1	ordinary
NFYA	DDIT3	ordinary
AKT3	FOXO3	ordinary
RHOC	PPP1R12B	ordinary
TPCN1	VCL	ordinary
MSRB3	QARS	ordinary
HGF	FGF2	ordinary
INPPL1	BIN1	ordinary
HIST1H2AC	HIST1H4H	ordinary
COPS3	LRR1	ordinary
GNAL	AKAP5	ordinary
FGFR4	FRS3	ordinary
FGF2	FRS2	ordinary
IFT140	PRKACB	ordinary
LPCAT3	PTDSS1	ordinary
PLD1	DDHD1	ordinary
DNAJC7	HSPA4	ordinary
RAD50	POLK	ordinary
PSMC5	UBE2C	ordinary
FXYD6	SLC13A3	ordinary
SLC12A6	ATP1B3	ordinary
CDC42	NDC80	ordinary
PRKAG1	LAMTOR3	ordinary
RB1CC1	PIK3C3	ordinary
TIGAR	PFKP	ordinary
GFPT2	BCAT1	ordinary
P2RX1	ATP2A3	ordinary
VDAC3	MICU3	ordinary
SRI	ATP2B4	ordinary
PSMA3	CDC26	ordinary
SRSF10	SRSF1	ordinary
RMI1	MNAT1	ordinary
PSMD7	GTSE1	ordinary
FXYD2	KCNQ1	ordinary
GNG10	BAG4	ordinary
FXYD3	SCN1B	ordinary
DLG4	TPM1	ordinary
MAP2K1	PAPD7	ordinary
ASPH	CPNE3	ordinary
PCF11	RPAP2	ordinary
ZMYM2	ABI2	ordinary
SLC1A5	CTPS1	ordinary
CTPS1	TPGS2	ordinary
PSMB3	ANAPC7	ordinary
NUP205	KPNA4	ordinary
ATP1B2	KCNE3	ordinary
NUPL2	CPSF1	ordinary
KAT5	FANCA	ordinary
LIG3	ZNF830	ordinary
SEH1L	SNRPD1	ordinary
GTF2H3	POLR2J	ordinary
MARC1	IARS	ordinary
HK1	SLC37A2	ordinary
CIT	MYL9	ordinary
AK2	GUK1	ordinary
AK8	ATP6V0E2	ordinary
P3H3	COL8A2	ordinary
KRAS	BRAP	ordinary
GRB2	CSK	ordinary
ITPR3	MYH11	ordinary
NEFL	MYH3	ordinary
SLC8B1	P2RX4	ordinary
SLC4A2	SLC12A7	ordinary
CA12	BST1	ordinary
MAPK1	ELK1	ordinary
ESPL1	CENPK	ordinary
CREBBP	PPARA	ordinary
DNAJB1	HSPA1A	ordinary
PLCH2	DGKQ	ordinary
GFPT1	GNPNAT1	ordinary
INPP4B	MTMR9	ordinary
NRG1	ERBB3	ordinary
SOS1	PIK3R1	ordinary
SLC24A3	TRPV2	ordinary
TRPC4AP	ITGB5	ordinary
ARF3	TMED2	ordinary
SLC35B2	CHST1	ordinary
HS2ST1	IMPAD1	ordinary
SOAT1	SLC27A5	ordinary
ARL2BP	ADCY9	ordinary
PSMA2	ANAPC16	ordinary
SMURF2	SMAD9	ordinary
RBBP7	CDKN2A	ordinary
NEDD8	BIRC5	ordinary
PAN3	EIF4A1	ordinary
EIF4G1	UPF1	ordinary
YES1	BTC	ordinary
EXOSC1	WDR46	ordinary
RAE1	CPSF4	ordinary
PDE2A	GMPR2	ordinary
WRN	REV3L	ordinary
MLXIPL	ACACB	ordinary
FASN	ACSL5	ordinary
PSMD2	CKS1B	ordinary
GPLD1	SPRN	ordinary
TFRC	PLEKHA1	ordinary
GNAI3	IQGAP1	ordinary
MAP2K3	MAPKAPK3	ordinary
EPHB4	EFNB2	ordinary
ATG4D	MAP1LC3B	ordinary
AKT1	FOXO1	ordinary
RAB3GAP2	DYNC1LI2	ordinary
CCNT1	SMAD4	ordinary
PIP4K2B	SNX9	ordinary
SEC24C	SEC23IP	ordinary
COPS7A	SPSB2	ordinary
NFRKB	COPS4	ordinary
COPS2	FBXL4	ordinary
NUP153	FIP1L1	ordinary
ATP1A2	KCNJ2	ordinary
SLC5A6	HLCS	ordinary
GMPS	TTLL5	ordinary
PPA1	PNP	ordinary
PYGB	PGM1	ordinary
PPP6R1	SEC24C	ordinary
SRC	QKI	ordinary
GRIA3	ITGA11	ordinary
ACOT9	ACAT1	ordinary
ITPK1	IPPK	ordinary
FURIN	MMP11	ordinary
COPS6	DTL	ordinary
SOCS3	LEPR	ordinary
PRKCD	CARD9	ordinary
CCNH	TCF3	ordinary
ECT2	RHOF	ordinary
CISH	IL2RG	ordinary
INPP5K	EPN2	ordinary
CLTA	BLOC1S1	ordinary
NUP50	XPO1	ordinary
CARM1	TRIB3	ordinary
B3GLCT	CFP	ordinary
GLE1	NUP214	ordinary
TXK	TRPC4	ordinary
GNB1	INPP5A	ordinary
SSB	POLR1D	ordinary
PSMB5	LTBR	ordinary
MMP1	IGF1	ordinary
INPP5B	ITPK1	ordinary
ADCY5	RAPGEF3	ordinary
PDE4D	AMPD3	ordinary
PSMD8	RNF146	ordinary
ITSN1	ARPC4	ordinary
NEK9	NUP188	ordinary
NUP43	KPNA5	ordinary
HHAT	SHH	ordinary
SHH	PTCH2	ordinary
RNF2	BMI1	ordinary
ELL	GTF2H5	ordinary
PTEN	DOCK1	ordinary
OSBPL10	PLA1A	ordinary
HSBP1	MRPL18	ordinary
PSME1	CD40	ordinary
SKIV2L2	WDR36	ordinary
PACSIN2	TGOLN2	ordinary
SYT11	PLEKHA2	ordinary
SUMO1	AURKB	ordinary
PSMD9	ANAPC5	ordinary
MAT2B	INMT	ordinary
ATP6V1C1	AK9	ordinary
GNG5	ITPKB	ordinary
FGFR1OP2	ABI1	ordinary
COPS5	COMMD5	ordinary
RHOA	PKN3	ordinary
SPRED2	SYNGAP1	ordinary
DOLK	DPAGT1	ordinary
SPIDR	XRCC2	ordinary
CSNK1D	YKT6	ordinary
GTF2H2	POLR2D	ordinary
TRPV4	CPLX1	ordinary
VDAC2	MICU1	ordinary
NCL	BMS1	ordinary
DAB2	CD4	ordinary
VAMP4	ARPC5	ordinary
ATP6V0B	SLC25A5	ordinary
PIK3CB	SNX18	ordinary
FAM20C	LGALS1	ordinary
SOCS1	MYD88	ordinary
TLR1	SNAP23	ordinary
RIPK3	TICAM1	ordinary
WDR19	PRKAR1A	ordinary
RBM28	UTP14A	ordinary
RPS3A	RPS14	ordinary
STXBP1	GAD1	ordinary
ERCC2	POLR2E	ordinary
RBBP4	ING5	ordinary
SLC38A2	SLC38A1	ordinary
CTPS2	TTLL4	ordinary
EPHA2	EFNA3	ordinary
PIK3R1	ITSN1	ordinary
PSMA7	TPP2	ordinary
BARD1	FANCL	ordinary
DNM2	AP2A1	ordinary
ORAI2	VDAC2	ordinary
BRAP	BRAF	ordinary
RYR1	ANXA6	ordinary
CEPT1	PTDSS2	ordinary
PTDSS1	PLA2G16	ordinary
INPP4A	MTMR14	ordinary
MCU	SLC8B1	ordinary
ALG10B	MAGT1	ordinary
SLC4A7	NCOA2	ordinary
ATAT1	SLC33A1	ordinary
CA3	AQP11	ordinary
ATP6V0C	ARL2BP	ordinary
POM121	GEMIN5	ordinary
PSMA5	ANAPC15	ordinary
GHR	IRS2	ordinary
JAK2	ZC3HAV1	ordinary
MBTPS1	ATF6	ordinary
PRKCB	STX4	ordinary
ATR	DBF4	ordinary
RCHY1	RFC1	ordinary
RFC5	NBN	ordinary
SNX9	WNT5A	ordinary
SMAD3	CDKN2B	ordinary
MSRB1	LARS	ordinary
AGBL5	TTLL1	ordinary
COPS7B	CCNF	ordinary
SUMF2	ARSG	ordinary
PHC1	HNRNPK	ordinary
RAB43	STX6	ordinary
HSP90AB1	HBEGF	ordinary
AMPD2	ADSS	ordinary
METTL14	POLR2B	ordinary
PSMC4	SPOP	ordinary
C9orf3	SLC7A6	ordinary
SLC7A6	SLC3A1	ordinary
MYLK	MYH14	ordinary
SEC16A	COL7A1	ordinary
LMAN1	SAR1B	ordinary
PSMC3IP	RAD51	ordinary
RPA3	HSPB1	ordinary
NUP210	SYMPK	ordinary
OCRL	OSBP	ordinary
GNPDA1	PFKL	ordinary
PFKL	ALDOC	ordinary
ARL6IP5	TTLL12	ordinary
BIN1	SLC2A8	ordinary
VAMP3	ARPC2	ordinary
LIN54	E2F1	ordinary
CDC25A	CCNE1	ordinary
PAFAH1B2	DYNC1I2	ordinary
PSMD14	CUL2	ordinary
ANAPC16	FZR1	ordinary
MNAT1	POLR2K	ordinary
GPSM1	GPER1	ordinary
TOMM22	ATP5G1	ordinary
IDH3G	AASS	ordinary
SLC39A7	MT1G	ordinary
FGF13	AHCYL2	ordinary
STAG1	STAG2	ordinary
NUP160	IPO8	ordinary
KYNU	HAAO	ordinary
USP18	MX1	ordinary
GSK3B	ZNRD1	ordinary
EXOSC6	NOP56	ordinary
HDAC1	MEAF6	ordinary
DVL3	EPHB3	ordinary
GNAO1	ITPR2	ordinary
FZD2	PPP2R1A	ordinary
SYNJ2	MTMR6	ordinary
PSMD11	BLMH	ordinary
NMT2	AACS	ordinary
PLCG2	RASGRP3	ordinary
ARAF	MACF1	ordinary
DVL1	PLCB3	ordinary
CACNB2	ORAI1	ordinary
EXOSC3	NOL6	ordinary
MAPK14	CBX8	ordinary
MAPKAPK2	ALOX5	ordinary
DENND2C	RAB9B	ordinary
MYO18A	CYFIP1	ordinary
FGF7	INPP5J	ordinary
ATP6V0A2	ABCC4	ordinary
MBD3	UBTF	ordinary
TGFBR2	TGFBR1	ordinary
NCSTN	EPHB4	ordinary
DGAT2	PNPLA4	ordinary
PAK1	CTNND1	ordinary
TOMM20	ATP5A1	ordinary
CUX1	GAB2	ordinary
IFT122	PDE7B	ordinary
FRS2	CPSF6	ordinary
PAFAH1B3	DYNC1H1	ordinary
PSMB6	ANAPC11	ordinary
TXNRD1	SEPHS2	ordinary
XYLT1	HSPG2	ordinary
SLC12A2	KCNN3	ordinary
LNPEP	HLA-G	ordinary
IL33	BRK1	ordinary
CACNA1D	CATSPER2	ordinary
JAK1	IL10RA	ordinary
FRAT1	PPP2R5E	ordinary
HADHA	ACADM	ordinary
CAMK2D	MYO6	ordinary
SUPT4H1	POLR2G	ordinary
EPHA4	EFNA4	ordinary
PSMD10	ANAPC10	ordinary
IRS2	WASF1	ordinary
COLGALT2	COL5A3	ordinary
CHD9	GLIPR1	ordinary
CDK11B	CEP131	ordinary
DYNC1H1	HSP90AA1	ordinary
EXOSC4	RRP7A	ordinary
PSMB1	NUMB	ordinary
ASB7	CUL5	ordinary
YY1	COPS5	ordinary
TFG	SEC13	ordinary
PAK2	MYLK	ordinary
PSME4	ANAPC1	ordinary
XRN2	DDX52	ordinary
WDR77	GEMIN7	ordinary
ORAI1	MYL6	ordinary
PDE3A	GMPR	ordinary
MTMR2	PITPNB	ordinary
SPTBN4	TMED3	ordinary
PRKAG2	RHEB	ordinary
MPHOSPH6	NOP58	ordinary
ATP6V1B2	ADPGK	ordinary
FOS	KDM6B	ordinary
DTYMK	ATP6V0D1	ordinary
GPT	LDHA	ordinary
IGF2R	PLIN3	ordinary
TCP1	BBS7	ordinary
PIP5K1C	PIK3R5	ordinary
PTK6	ARHGAP35	ordinary
CDK4	E2F4	ordinary
E2F5	CCNA2	ordinary
INO80	COPS2	ordinary
CPSF6	CYFIP2	ordinary
HENMT1	TDRKH	ordinary
PRKACA	IL3RA	ordinary
SLC25A22	GLUD2	ordinary
SLC35B4	GCNT4	ordinary
PNPLA2	AQP3	ordinary
PPP2R1A	PPP2R5C	ordinary
NPEPPS	TAP1	ordinary
AGTPBP1	RIMKLA	ordinary
INPP5A	INPP1	ordinary
LCLAT1	ACSL3	ordinary
SLC25A16	ALDH6A1	ordinary
POLE4	EXO1	ordinary
RHOQ	EXOC4	ordinary
CFTR	SLC4A8	ordinary
SCARB2	INPP4B	ordinary
TSC2	MLST8	ordinary
SLC38A9	RARS	ordinary
LAMTOR4	MAF1	ordinary
PKLR	ATP6V1C2	ordinary
FBXL18	FBXL7	ordinary
SEC11A	RPS17	ordinary
CACNA2D1	CALD1	ordinary
CALM2	IQGAP3	ordinary
EHMT2	TBP	ordinary
TPR	WDR33	ordinary
RUVBL1	COPS7A	ordinary
ARNTL	CRY1	ordinary
ATP6V1F	NME2	ordinary
ARRB1	EPS15L1	ordinary
SLC2A8	ARPC1B	ordinary
ASL	CALM3	ordinary
STRADB	PRKAG2	ordinary
CCT4	BBS1	ordinary
RAB8A	EXOC7	ordinary
ATP6AP1	SLC25A6	ordinary
ACTL6A	COPS3	ordinary
RBX1	SPRED2	ordinary
RILP	CAPZA1	ordinary
TTL	TUBB2A	ordinary
ATP2A2	NOTCH3	ordinary
SRF	ITGB1	ordinary
OSBPL1A	DCTN6	ordinary
NUP155	SNRPD2	ordinary
NUP35	GEMIN6	ordinary
EDC3	LSM5	ordinary
EIF1AX	RPL6	ordinary
GNAS	PRKAR2B	ordinary
UBE2D1	SMAD1	ordinary
SMURF1	PTCH1	ordinary
PIK3R3	FNBP1L	ordinary
PMPCB	PHB	ordinary
ATIC	ADSSL1	ordinary
FTCD	TTLL6	ordinary
AGPAT2	LPIN2	ordinary
NPAS2	KLF15	ordinary
WDR35	PDE8B	ordinary
GSS	GSTM3	ordinary
GCHFR	PTS	ordinary
PSPH	SERINC5	ordinary
PTGS1	PTGDS	ordinary
CCAR2	SERPINH1	ordinary
ADRA2A	GNG7	ordinary
CDIPT	PIGQ	ordinary
PIK3C3	RUFY1	ordinary
RYR3	TMOD1	ordinary
NECAP1	M6PR	ordinary
KLHL12	DVL1	ordinary
MTFMT	MTHFD1L	ordinary
SLC25A32	FTCD	ordinary
TDP2	XRCC5	ordinary
CBX8	SUMO1	ordinary
PPP1R13B	BAX	ordinary
RRAGA	AZIN2	ordinary
FIG4	MTMR12	ordinary
CRLS1	TAZ	ordinary
NUP188	ALYREF	ordinary
SPCS3	RPN2	ordinary
EFNB1	GIT1	ordinary
PTK2	WASL	ordinary
CCT2	TTC8	ordinary
MTMR1	PIP4K2C	ordinary
SLC25A6	MB21D1	ordinary
PGM1	SLC37A4	ordinary
NFIC	POLR3C	ordinary
RRAGD	NOS3	ordinary
EPHB1	EFNB3	ordinary
CTSL	HLA-B	ordinary
PSMC6	SKP2	ordinary
PCNA	RMI2	ordinary
NOS3	GUCY1A3	ordinary
ITSN2	ACTR2	ordinary
PLPP5	PRKCE	ordinary
ACTR1B	DCTN2	ordinary
SEC11C	SSR2	ordinary
VAMP8	CLINT1	ordinary
NIP7	UTP18	ordinary
PSMD12	HNRNPD	ordinary
PRMT5	GEMIN4	ordinary
CSNK2A1	SMC2	ordinary
RAB3GAP1	DCTN1	ordinary
PRKG2	KCNMB1	ordinary
MAT2A	MECOM	ordinary
N6AMT1	ETF1	ordinary
RMI2	FANCG	ordinary
NCOA6	GRHL1	ordinary
TALDO1	GPI	ordinary
PRPS1	HPRT1	ordinary
PDPN	TRPC6	ordinary
MBOAT7	PITPNM1	ordinary
NUP98	DDX20	ordinary
TBL1X	PEX11A	ordinary
BLMH	TAP2	ordinary
ATP6V0A1	TSPAN7	ordinary
VDAC1	MICU2	ordinary
CTNNB1	AXIN2	ordinary
SPCS2	SEC61G	ordinary
DZIP1	SPOPL	ordinary
GLUL	CTPS2	ordinary
SLC6A6	BEST1	ordinary
MTRR	FPGS	ordinary
TLN1	PTK2	ordinary
ADCY1	PDE4D	ordinary
PLCB1	DGKE	ordinary
RXRA	PLIN2	ordinary
COPS8	KLHL5	ordinary
DOLPP1	DPM1	ordinary
RAC1	PKN1	ordinary
PCGF2	UBE2I	ordinary
GPR161	PDE3A	ordinary
MSRB2	MAT2A	ordinary
INO80D	COPS6	ordinary
ATP2B1	ATP2A2	ordinary
DEK	H2AFV	ordinary
SIRT1	CLOCK	ordinary
WIPI2	GABARAPL2	ordinary
LAMTOR1	SLC3A2	ordinary
NOS2	GUCY1B3	ordinary
EFNA4	VAV3	ordinary
ACAA2	ACSF2	ordinary
HDAC2	BRD7	ordinary
ALDH18A1	OAT	ordinary
SLC1A1	TTLL11	ordinary
NAGS	ACSM5	ordinary
PEMT	PLD6	ordinary
PLD6	TRIAP1	ordinary
ARF5	COPA	ordinary
RFC3	RAD51C	ordinary
OSBPL5	PLA2G12A	ordinary
MED1	RGL1	ordinary
ATG4A	GABARAPL1	ordinary
DAPP1	DGKZ	ordinary
GAB2	CUX1	ordinary
SKP1	BTRC	ordinary
RABGGTA	RAB24	ordinary
ACSL5	ZDHHC2	ordinary
FANCD2	BRCA1	ordinary
RPA1	HSPH1	ordinary
GNB2	CACNB2	ordinary
NBN	TCEA1	ordinary
FGFR1	FCGR1A	ordinary
SLC50A1	SLC5A9	ordinary
SLC5A9	HK2	ordinary
PSMC1	MAD2L1	ordinary
EPS15	DAB2	ordinary
RNF111	GTF2H3	ordinary
GFRA1	RET	ordinary
IHH	SMURF1	ordinary
FGFR3	FGFR2	ordinary
ADAM17	NRG1	ordinary
GTF2H1	NCBP1	ordinary
DCTD	TYMS	ordinary
USP21	RNF31	ordinary
POLK	RAD50	ordinary
RAD51C	CDK4	ordinary
PITPNM2	PLA2R1	ordinary
CLCN2	SLC4A2	ordinary
OTUD7B	RBCK1	ordinary
NEK7	NDC1	ordinary
NUP37	SLBP	ordinary
DNMT3B	HIST1H2BD	ordinary
MCM3	PRIM2	ordinary
NUDT5	TKT	ordinary
TKT	PFKM	ordinary
HDAC4	RUNX3	ordinary
OTUD5	MAVS	ordinary
ARF6	FCHO2	ordinary
SLC4A3	SLC12A4	ordinary
EFNB3	TIAM1	ordinary
PIK3AP1	TRIM24	ordinary
SYNJ1	SBF2	ordinary
DHFR	CALM1	ordinary
ABHD12	PLD1	ordinary
CILP	IGF2	ordinary
DCUN1D2	CUL4A	ordinary
MMP2	SCUBE3	ordinary
RBKS	PRPS2	ordinary
PPARG	CD36	ordinary
STON2	PIP5K1B	ordinary
ACTR3	VAMP2	ordinary
MKS1	GLI1	ordinary
BRAF	KIAA1549	ordinary
PPP5C	PIAS4	ordinary
UBE2V2	SUMO2	ordinary
LPCAT4	LPCAT1	ordinary
PLBD1	LPCAT3	ordinary
FAM114A2	MAP2K2	ordinary
FAM20A	TMEM132A	ordinary
IKBKG	NFKBIE	ordinary
MYO5A	EXOC8	ordinary
ACSM1	GLYATL2	ordinary
RAB7A	ACTR10	ordinary
EPHB6	LIMK1	ordinary
AGFG1	ACTR3	ordinary
PLCD3	ITPKC	ordinary
HSPA9	HSPD1	ordinary
GALE	NUDT14	ordinary
VPS4A	CHMP3	ordinary
PRKAA1	LAMTOR2	ordinary
RPTOR	ULK1	ordinary
WTAP	NCBP2	ordinary
EBNA1BP2	SENP3	ordinary
INMT	AHCY	ordinary
MAP2K2	AGGF1	ordinary
SPTBN1	ARCN1	ordinary
PIK3C2B	FCHO1	ordinary
GUCY1A2	PDE1A	ordinary
PDZD11	PANK2	ordinary
GNAQ	DGKH	ordinary
NUP54	HNRNPC	ordinary
P3H2	COL14A1	ordinary
ADCY9	PDE4A	ordinary
TFDP1	RRM2	ordinary
KPNA1	PSIP1	ordinary
PAK3	JUP	ordinary
PIP5K1A	PIK3CA	ordinary
UBQLN2	AAK1	ordinary
COMMD1	NEDD8	ordinary
TIMM50	HSCB	ordinary
UAP1	SLC35A3	ordinary
BAG2	HSPA12A	ordinary
GPSM2	S1PR1	ordinary
FBXL5	IREB2	ordinary
MTMR4	PIKFYVE	ordinary
IQGAP1	MAP2K1	ordinary
TTC21B	RAPGEF4	ordinary
PLCH1	DGKA	ordinary
PI4K2B	REPS2	ordinary
REPS1	IGF2R	ordinary
RPA2	HSPA1L	ordinary
MLST8	AKT1S1	ordinary
SHB	ITGAV	ordinary
ROCK2	PPP1CB	ordinary
EPN1	CLTB	ordinary
ARPC4	VAMP8	ordinary
PSMC2	CDC23	ordinary
DOHH	EIF5A	ordinary
ELOVL7	HSD17B12	ordinary
TRAPPC1	RAB1B	ordinary
CDK5	LMNB1	ordinary
PGP	PLD2	ordinary
ATG101	DYNLL2	ordinary
DCP2	LSM7	ordinary
C1QBP	KLKB1	ordinary
CBX2	CETN2	ordinary
DHCR24	SREBF2	ordinary
PDGFB	PDGFRB	ordinary
AQR	ERCC6	ordinary
PRKG1	KCNMA1	ordinary
STON1	ARPC1A	ordinary
METTL3	POLR2H	ordinary
PIK3CA	PICALM	ordinary
EPN2	ITSN2	ordinary
STK11	PRKAA2	ordinary
TRIM24	WASF3	ordinary
MTMR9	PIP4K2B	ordinary
RAB33B	MAN1A2	ordinary
MBOAT1	PLA2G4C	ordinary
FAM96B	NUBP2	ordinary
IL6ST	PTPN11	ordinary
DENND1C	RAB8B	ordinary
ACTR1A	FKBP4	ordinary
TSC1	MTOR	ordinary
RHEB	EIF4EBP1	ordinary
APC	CTNNB1	ordinary
PANK4	PPCS	ordinary
HS3ST1	GPC4	ordinary
ANO6	SLC6A6	ordinary
SLC6A9	ANO5	ordinary
LRP12	GPC6	ordinary
FCHO2	AP2M1	ordinary
NUP93	SNRPG	ordinary
NCALD	SRI	ordinary
MCOLN2	TMOD2	ordinary
NAA30	ARFRP1	ordinary
CCT5	BBS5	ordinary
PIAS2	SUZ12	ordinary
RYR2	DES	ordinary
CDK6	TFDP2	ordinary
SLC35A3	MFNG	ordinary
ACTR2	VAMP7	ordinary
SLC4A4	NCOA1	ordinary
NFYB	SQLE	ordinary
SP1	FASN	ordinary
MMP19	LAMC2	ordinary
CLCN6	ARHGEF9	ordinary
PFAS	GART	ordinary
PSMD4	OAZ3	ordinary
ABHD6	AQP9	ordinary
PPIP5K1	IP6K3	ordinary
RAB13	MYO1C	ordinary
FGA	F13A1	ordinary
ASNA1	SEC61B	ordinary
USP1	ERCC4	ordinary
SLC35A1	ST6GALNAC6	ordinary
CSNK1A1	APC	ordinary
PSMD5	CDC27	ordinary
TRPC6	DYSF	ordinary
GLUD2	CPS1	ordinary
SMAD4	BCL2L11	ordinary
PMPCA	TIMM50	ordinary
TIMM17A	FXN	ordinary
MTMR6	PIP4K2A	ordinary
CDKN1A	ORC6	ordinary
RGS2	GNA14	ordinary
CLCN7	ANO8	ordinary
PTPRK	CBL	ordinary
UBXN7	DCUN1D1	ordinary
UBE2N	PELI1	ordinary
ZDHHC8	MORC2	ordinary
BAG3	HSPA6	ordinary
ABCA5	ABCA9	ordinary
ABCA9	CH25H	ordinary
AKT2	GSK3A	ordinary
CLNS1A	SNRPE	ordinary
MBTPS2	CREB3L2	ordinary
AHCY	BHMT2	ordinary
CLOCK	BHLHE41	ordinary
CRTAP	COL1A1	ordinary
SPINT1	MST1	ordinary
SLC35B3	HS2ST1	ordinary
TTF1	TAF1A	ordinary
EPAS1	HIGD1A	ordinary
CAD	DHODH	ordinary
GNPDA2	GFPT1	ordinary
B4GALT3	LUM	ordinary
PRKAB2	RRAGB	ordinary
PTGS2	PTGS1	ordinary
CYB5R1	SLC40A1	ordinary
IDH3B	SLC25A11	ordinary
AADAT	GOT2	ordinary
TRAPPC11	CHML	ordinary
RAP1A	SYK	ordinary
NELFCD	RAD51D	ordinary
DGAT1	FITM2	ordinary
CTSC	CD74	ordinary
MEN1	MYC	ordinary
SENP1	SUMO3	ordinary
UGP2	PPP1R3C	ordinary
PSMA6	BUB3	ordinary
TECR	SCD5	ordinary
ARPC2	AGTR1	ordinary
FZD4	ARPC3	ordinary
CAPN1	FLG	ordinary
ITPKC	INPPL1	ordinary
HOXA1	WDR5	ordinary
ERBB3	FGF1	ordinary
SPR	PAH	ordinary
LIN7C	STX1A	ordinary
IL1B	SQSTM1	ordinary
POLR2B	ATR	ordinary
HIST1H2BC	HIST4H4	ordinary
CERS2	DEGS1	ordinary
PIAS3	MITF	ordinary
REEP1	OR51E1	ordinary
FNBP1	KIAA0319	ordinary
UBE2D3	SMAD5	ordinary
PPFIA3	ACHE	ordinary
HIP1R	AVPR2	ordinary
ORMDL1	ATAT1	ordinary
ERCC6	TAF1B	ordinary
DYNC1I2	NR3C1	ordinary
HMGB2	H1F0	ordinary
CDK1	CENPH	ordinary
H2AFZ	NCAPH2	ordinary
SLC20A1	SLC4A4	ordinary
ERF	ETS2	ordinary
GAMT	CKB	ordinary
BBS10	BBS4	ordinary
PPP1R12A	MYH10	ordinary
SMC5	SMC1A	ordinary
PSMB4	OAZ1	ordinary
STX1A	TRPM2	ordinary
LAMTOR2	RPS6KB1	ordinary
LIN7B	PPFIA3	ordinary
CNOT8	PAIP1	ordinary
SLC17A1	SLC17A3	ordinary
CASK	PPFIA1	ordinary
IER3	PPP2R5B	ordinary
INPP5E	PLEKHA8	ordinary
ASPA	CAD	ordinary
PIGO	PIGS	ordinary
CNOT6L	EIF4B	ordinary
PSMB2	RELB	ordinary
CALM1	SPARC	ordinary
ALG10	STT3A	ordinary
USP30	PTRH2	ordinary
RPE	PPP2CA	ordinary
ITGAV	VEGFA	ordinary
ST6GALNAC6	SLC35A1	ordinary
SGMS2	SMPD2	ordinary
SLC3A2	GCLC	ordinary
CNOT3	EIF4A2	ordinary
NRAS	AGK	ordinary
CCT3	BBS2	ordinary
MAOA	PRDX2	ordinary
PRDX5	TXN2	ordinary
PSEN2	EPHB2	ordinary
TRRAP	TCF4	ordinary
RB1	SMC4	ordinary
MCFD2	SEC24A	ordinary
MDC1	TP53BP1	ordinary
GFER	TIMM13	ordinary
UBE2V1	TAB3	ordinary
GGT1	NCALD	ordinary
STIM1	PPP3R1	ordinary
ABCB7	ABCG2	ordinary
PPP3R1	YWHAQ	ordinary
SLC22A5	AKAP1	ordinary
CYP4F11	CYP4F3	ordinary
CYP4A11	CYP4A22	ordinary
APH1A	DTX2	ordinary
LOXL1	MFAP2	ordinary
SARM1	TLR4	ordinary
NARFL	ERCC2	ordinary
NDC1	XPOT	ordinary
CACNB3	CACNB1	ordinary
MCM4	POLA2	ordinary
CD79A	BLNK	ordinary
BIRC2	NOD2	ordinary
FOXO3	SOD2	ordinary
MAOB	GPX1	ordinary
CNOT1	EIF4G1	ordinary
ABCB8	HMOX2	ordinary
EP400	UBN1	ordinary
TMED2	SEC24D	ordinary
LIPT2	NDUFAB1	ordinary
ACTB	COPS8	ordinary
CHMP3	MAP1LC3A	ordinary
FAAP24	UBE2T	ordinary
C2CD5	EXOC6	ordinary
RICTOR	AKT3	ordinary
PIGU	PLAUR	ordinary
CDKN1B	MCM7	ordinary
ESD	MGST3	ordinary
NR1H4	FABP6	ordinary
EIF5	EIF3J	ordinary
GMPR2	IMPDH2	ordinary
SFRP2	FZD1	ordinary
LRP5	FZD5	ordinary
CLCN4	SLC12A6	ordinary
CLTCL1	TACR1	ordinary
DCTN4	PTGES3	ordinary
FAR1	AGPS	ordinary
SLC35D1	POMGNT2	ordinary
SLC25A13	ASNS	ordinary
FAAH	CYP2J2	ordinary
SPRED3	RASA3	ordinary
FDPS	FDFT1	ordinary
GGPS1	FDPS	ordinary
VCP	HLA-A	ordinary
ARFGAP3	USO1	ordinary
PIGN	CEPT1	ordinary
EFNB2	PAK2	ordinary
CHMP5	CHMP2B	ordinary
RNF185	CFTR	ordinary
DMPK	PLN	ordinary
PSMD13	TNFRSF12A	ordinary
TMED5	WNT9A	ordinary
ACSM2B	GLYAT	ordinary
SLC39A10	S100A8	ordinary
LTB	TRAF2	ordinary
MAPKAPK3	CBX6	ordinary
RAB11A	EXOC1	ordinary
NUP58	KPNA3	ordinary
RPS19BP1	SIRT1	ordinary
GNA11	DAGLA	ordinary
PSMD1	CUL3	ordinary
MTHFD1	ALDH1L1	ordinary
CERS5	DEGS2	ordinary
CNTRL	SOS1	ordinary
ARL2	ATP6V1F	ordinary
PSMA4	OAZ2	ordinary
ROCK1	PPP1R12A	ordinary
MCOLN3	SORBS1	ordinary
PPP2R5A	PDPK1	ordinary
SUZ12	H3F3A	ordinary
SEPT2	MAPRE1	ordinary
SEMA4D	RRAS	ordinary
MAPK6	NCOA3	ordinary
DNAJC2	HSPA1B	ordinary
DVL2	HGS	ordinary
ABL1	CDKN1C	ordinary
PLCB4	SYNJ1	ordinary
DIO2	SLC26A4	ordinary
ARHGAP10	RHOT2	ordinary
TRPC4	SNAP25	ordinary
ULK1	DENND3	ordinary
OSTM1	ANO1	ordinary
DYNLL1	NR3C2	ordinary
SGK1	SCNN1D	ordinary
SLC38A1	SLC38A2	ordinary
CUL5	CDC37	ordinary
CASP6	SATB1	ordinary
FOLH1	TTLL7	ordinary
DYNC2H1	GLI3	ordinary
IGF1R	IRS1	ordinary
ADIPOR1	MLXIPL	ordinary
PAPSS2	SLC35B3	ordinary
ADAM10	JAG1	ordinary
TOMM5	CYC1	ordinary
AHCYL2	FGF13	ordinary
KDSR	CERS6	ordinary
SBF2	RAB21	ordinary
MAPK3	RPS6KA5	ordinary
FAM120B	FABP4	ordinary
KDM5B	CDKN1A	ordinary
GPAT4	GPAT3	ordinary
SLC6A13	ANO7	ordinary
EXOSC10	WDR75	ordinary
COMMD4	UBE2M	ordinary
RFC1	PALB2	ordinary
PPIA	NFATC2	ordinary
SMARCD3	SLC27A1	ordinary
RBL1	CDK1	ordinary
VPS72	HIST3H2A	ordinary
VNN1	PANK1	ordinary
DCP1A	PATL1	ordinary
OPLAH	RIMKLB	ordinary
POFUT1	NOTCH1	ordinary
POLR2I	NELFE	ordinary
BBS12	BBS9	ordinary
GATAD2A	BRD1	ordinary
OSBPL8	SACM1L	ordinary
H2AFX	EYA3	ordinary
HMGB1	DFFB	ordinary
COASY	SLC25A16	ordinary
MTR	EPRS	ordinary
ACSM5	GLYATL1	ordinary
TRPM3	MYL3	ordinary
RIOK3	TSR1	ordinary
TOP3A	LIG3	ordinary
ARFGAP2	CD59	ordinary
SMPD2	SGMS2	ordinary
SULT1A1	BPNT1	ordinary
CHM	RAB22A	ordinary
RNF168	BARD1	ordinary
DDX21	TEX10	ordinary
CPLX1	HSPA8	ordinary
MVD	IDI1	ordinary
ARHGEF9	AGT	ordinary
E2F3	EED	ordinary
CCZ1B	RAB7A	ordinary
AP2M1	GRIP1	ordinary
PPP2R5E	YWHAB	ordinary
TNIK	MAP3K5	ordinary
GPS1	COMMD4	ordinary
ERCC4	TOPBP1	ordinary
ACOT1	ACSL1	ordinary
GATAD2B	BRPF3	ordinary
GNAZ	PRKAR2A	ordinary
CA13	ATP6V1H	ordinary
AGPAT3	PAFAH1B1	ordinary
PTPN11	IFNAR2	ordinary
LAMTOR5	EEF1E1	ordinary
BCAT2	ADHFE1	ordinary
TMLHE	SDHD	ordinary
MCOLN1	ITGA1	ordinary
APBA1	STXBP1	ordinary
GOLGA2	GORASP1	ordinary
FXYD1	SLC20A2	ordinary
PRODH	PYCR1	ordinary
FZR1	MCM5	ordinary
MCRS1	RAD23A	ordinary
ASRGL1	FARSA	ordinary
CITED2	ARNT	ordinary
GBA2	SLC2A1	ordinary
TFPT	GPS1	ordinary
DCUN1D5	UBE2F	ordinary
ST13	HSPA9	ordinary
PIAS4	MTA1	ordinary
ADCY4	PDE8A	ordinary
DCP1B	LSM2	ordinary
KBTBD7	NF1	ordinary
DENND2A	RAB9A	ordinary
RUVBL2	DKC1	ordinary
SOCS2	IL7	ordinary
MASTL	ARPP19	ordinary
MCAT	ACSF3	ordinary
ABCC9	ATP1B1	ordinary
POLR2J	EPAS1	ordinary
PPFIA1	ARL6IP5	ordinary
IFNAR1	JAK1	ordinary
VRK1	LEMD2	ordinary
AP2S1	GRIP2	ordinary
ATP6V1E1	SLC25A4	ordinary
XRN1	LSM4	ordinary
NUP133	CPSF2	ordinary
ATG13	AMBRA1	ordinary
IRAK2	IKBKG	ordinary
PIKFYVE	MTMR2	ordinary
TIRAP	IRAK2	ordinary
HIST1H2BD	HIST1H3H	ordinary
ADAMTS3	COL27A1	ordinary
RAB3IL1	RAB3A	ordinary
FAM13B	CDC42	ordinary
VAV2	ITPR3	ordinary
SLC7A7	SLC7A9	ordinary
SEC23A	GOSR2	ordinary
METAP1	MAT2B	ordinary
SPTBN5	TMED9	ordinary
EBF1	PPARG	ordinary
PSMC3	TNKS2	ordinary
ARF4	KDELR2	ordinary
NSMCE1	SMC3	ordinary
ARNT	CA9	ordinary
RNF4	BRCC3	ordinary
DGKQ	LPIN3	ordinary
DLG1	ATP2C1	ordinary
EPHB2	EFNB1	ordinary
NMRK1	NMNAT2	ordinary
PORCN	WNT2B	ordinary
RNF216	TRIM25	ordinary
USP9X	SNCA	ordinary
UBE2M	FBXW11	ordinary
FBXW11	NFKB1	ordinary
PLCD4	DGAT1	ordinary
AK9	WDR35	ordinary
CSNK1G2	GSK3B	ordinary
AQP1	NT5E	ordinary
VAC14	MTM1	ordinary
RRAGC	SLC7A7	ordinary
AAAS	SMN1	ordinary
CTSA	GLB1L	ordinary
INPP5J	PIK3R3	ordinary
ADCY6	HCN3	ordinary
ARF1	COPZ1	ordinary
MMS19	RTEL1	ordinary
IRAK1	PELI3	ordinary
ISYNA1	IMPA1	ordinary
DHCR7	DHCR24	ordinary
F8	F10	ordinary
PHF20	MDM4	ordinary
NFYC	HSPA5	ordinary
RHOB	PKN2	ordinary
TEC	PRKCA	ordinary
PCOLCE2	COL5A2	ordinary
LIMK1	CFL1	ordinary
COPS4	FBXL5	ordinary
NME2	ADCY3	ordinary
RAB18	DCTN4	ordinary
RIMKLB	NAALAD2	ordinary
AGMO	AQP7	ordinary
LTA4H	CYP4A11	ordinary
SUPT5H	SNAPC4	ordinary
CYB5B	KARS	ordinary
RNF5	UBB	ordinary
PPP1R12B	MYH9	ordinary
NR1D1	ARNTL	ordinary
TP53BP1	MDC1	ordinary
MRS2	PDHX	ordinary
GLUD1	OGDH	ordinary
CDK11A	OFD1	ordinary
ACADS	ECHS1	ordinary
MAP3K7	CHUK	ordinary
CNOT11	EIF4A3	ordinary
TNIP2	MAP3K8	ordinary
NUDT14	PGM2	ordinary
GNL3	PELP1	ordinary
RIPK1	CASP10	ordinary
RANGAP1	CDCA8	ordinary
RPIA	PRPS1	ordinary
C1D	WDR43	ordinary
CACNA1C	P2RX7	ordinary
PPP1CB	CSNK1D	ordinary
GABPB1	POLG2	ordinary
PEX10	UBE2D2	ordinary
TGOLN2	MYO10	ordinary
CHST2	PRELP	ordinary
PIAS1	SP3	ordinary
TOMM7	BCS1L	ordinary
FTSJ3	NOL11	ordinary
NSMCE2	RAD21	ordinary
FADS2	ABCD1	ordinary
HIST1H2BK	HIST1H4I	ordinary
CLU	C7	ordinary
PRDX6	GSR	ordinary
ARSB	IDS	ordinary
PTK2B	KDR	ordinary
GGT7	DLG3	ordinary
ACO2	IDH3A	ordinary
RBBP8	FANCC	ordinary
SEL1L	RPS27A	ordinary
GALNT7	MUC13	ordinary
GMPPB	GMDS	ordinary
DPM2	PIGL	ordinary
CYLD	SHARPIN	ordinary
CDC73	UBE2B	ordinary
PHKA1	PYGM	ordinary
RBL2	MYBL2	ordinary
COMT	MTR	ordinary
CD79B	CBLB	ordinary
MMP7	SPP1	ordinary
MAGED1	MAPK8	ordinary
MAPK8	BMF	ordinary
VAPA	MOV10	ordinary
INHBA	ACVR1B	ordinary
MAP2K7	MAPK10	ordinary
APRT	LHPP	ordinary
GDE1	GPAT4	ordinary
FRAT2	AMER1	ordinary
SLC5A1	AKR1B1	ordinary
CCND3	E2F2	ordinary
MCM2	POLE3	ordinary
DNAL4	AP2A2	ordinary
SLX4	DNA2	ordinary
PPP3CC	YWHAH	ordinary
PAFAH1B1	BICD2	ordinary
HSCB	GLRX5	ordinary
PPP1CA	CSNK1E	ordinary
PRKAB1	TBC1D1	ordinary
SYN1	SLC6A3	ordinary
CHML	RAB40C	ordinary
APH1B	DTX4	ordinary
LEPR	JAK2	ordinary
PIK3R4	FIG4	ordinary
STAT3	ICAM1	ordinary
IKBKB	CYLD	ordinary
ACSL1	PPARD	ordinary
GSR	CHAC2	ordinary
AGO3	RUNX1	ordinary
NF1	RASA1	ordinary
MAPK12	MEF2D	ordinary
SLC25A11	LIMD1	ordinary
VTA1	CHMP4C	ordinary
FKBP1B	ACTG2	ordinary
PPP2R1B	RBL2	ordinary
WWTR1	SMAD7	ordinary
PPP2R5C	MARK3	ordinary
B3GALT6	SDC4	ordinary
HIST1H4I	EYA2	ordinary
GNG12	CACNA2D2	ordinary
KIF7	GLI2	ordinary
ARHGEF17	RHOQ	ordinary
PSMD3	CDC16	ordinary
PRKACB	GFRA1	ordinary
LEF1	CCND1	ordinary
MTA2	BRPF1	ordinary
ATG9A	BECN1	ordinary
DENND6A	RAB14	ordinary
CACNA1A	PPFIA4	ordinary
UBE2B	UBE2N	ordinary
ATP6V1D	PYGL	ordinary
DYRK1A	LIN54	ordinary
CHMP6	GABARAP	ordinary
PSMF1	BUB1B	ordinary
PTP4A2	RABGGTB	ordinary
MORC2	NAA30	ordinary
CYB5RL	CP	ordinary
ITGB3	SHB	ordinary
IRAK4	PELI2	ordinary
CHD4	KAT6A	ordinary
GTF2H5	POLR2I	ordinary
MKKS	BBIP1	ordinary
TRPC1	PPP3CB	ordinary
PSENEN	NGFR	ordinary
NME1	TCIRG1	ordinary
RABGGTB	RAB17	ordinary
RPS6KA3	CREB1	ordinary
MAPKAPK5	KALRN	ordinary
TBC1D25	RAB33A	ordinary
RAB3A	SLC1A1	ordinary
RBPJ	GZMB	ordinary
NRIP1	NR1D1	ordinary
ABCA3	ADRA2C	ordinary
MYD88	CNTRL	ordinary
FEN1	POLD3	ordinary
TAB1	MAP2K7	ordinary
TBL1XR1	TXNRD1	ordinary
SLC9A1	SLC9A7	ordinary
TRAP1	SDHB	ordinary
TNRC6B	NLK	ordinary
SLC26A1	PAPSS2	ordinary
HRAS	AGTRAP	ordinary
IL6R	STAT3	ordinary
GTF2H4	GTF2F2	ordinary
CCNB1	CDCA5	ordinary
KDR	ROCK2	ordinary
KDM4A	HERC2	ordinary
PNPLA6	GDPD5	ordinary
GPCPD1	ETNK2	ordinary
PNPLA8	MBOAT2	ordinary
CATSPER2	TPM4	ordinary
NFIB	POLR3K	ordinary
VAMP2	CACFD1	ordinary
PDGFRB	FYN	ordinary
LIN7A	SYN1	ordinary
AP2A1	ROR2	ordinary
STK3	MOB1B	ordinary
LATS2	WWTR1	ordinary
CATSPERG	NEB	ordinary
ITPR1	TTN	ordinary
DDX6	LSM6	ordinary
STRADA	PRKAB1	ordinary
RGS3	GNA11	ordinary
MYH7B	EXOC3	ordinary
PTDSS2	OSBPL8	ordinary
DENND4A	RAB10	ordinary
CNOT10	PABPC1	ordinary
POLD2	RAD51AP1	ordinary
MAP2K4	MAPK9	ordinary
UBB	RFC5	ordinary
RAB10	EXOC2	ordinary
IDH1	WTIP	ordinary
B3GAT3	GPC3	ordinary
SPTLC1	AASDHPPT	ordinary
RAPGEF4	KCNJ11	ordinary
PAXIP1	DCLRE1C	ordinary
POLE3	RMI1	ordinary
MTMR12	PI4K2B	ordinary
SLC2A6	SLC5A1	ordinary
GNGT2	DGKI	ordinary
MOCOS	AARS	ordinary
XRCC5	PRKDC	ordinary
GNS	HEXA	ordinary
PSMB7	ANAPC2	ordinary
CNDP2	NFS1	ordinary
IL1R1	IRAK1	ordinary
ATP6V0D1	DTYMK	ordinary
SCLY	GPT	ordinary
PSME2	EGLN1	ordinary
GPI	SLC37A1	ordinary
GAB1	PAG1	ordinary
CDA	UPP1	ordinary
GUCY1A3	PDE5A	ordinary
CYCS	CASP9	ordinary
HNF1A	HNF4G	ordinary
METAP2	DARS	ordinary
EPHB3	LIMK2	ordinary
SH3KBP1	PIK3AP1	ordinary
OGDH	GCDH	ordinary
SLC26A2	PAPSS1	ordinary
MAP2K6	BOC	ordinary
PRKAA2	TSC1	ordinary
PIGW	ACSL4	ordinary
NUP214	SNRPB	ordinary
GAPVD1	RAB5B	ordinary
REEP5	GNGT1	ordinary
CDC16	IL6	ordinary
CHST1	FMOD	ordinary
IPPK	PPIP5K2	ordinary
IP6K2	IP6K1	ordinary
CFLAR	TNFSF10	ordinary
HSPH1	HSPA12B	ordinary
LAMTOR3	AIMP1	ordinary
MMAA	SUCLG2	ordinary
OXCT1	SDHA	ordinary
CLCN3	ANO6	ordinary
IRS1	FGFR1OP	ordinary
PPP3CB	NFATC3	ordinary
AKAP13	RHOU	ordinary
ERAP2	B2M	ordinary
NAALAD2	TPGS1	ordinary
PKM	ATP6V1D	ordinary
MID1IP1	ELOVL1	ordinary
RPS27A	RFC2	ordinary
NUP88	CPSF3	ordinary
MTM1	PPP2R5A	ordinary
MGLL	PLD3	ordinary
TPP2	THOP1	ordinary
KLKB1	F12	ordinary
HMOX2	BLVRB	ordinary
PLCB3	PRKCZ	ordinary
XRCC1	XAB2	ordinary
VHL	HIF1A	ordinary
RACGAP1	HLA-DQB1	ordinary
PDPK1	RPS6KA3	ordinary
LCK	TYROBP	ordinary
SPRED1	RASAL2	ordinary
PRMT1	PRMT6	ordinary
ANOS1	FGFR1	ordinary
SLC25A26	MRM1	ordinary
IL1RAP	BCR	ordinary
TBC1D1	RAB13	ordinary
POLH	BRCA2	ordinary
SOS2	RHOC	ordinary
UBE2T	RPA2	ordinary
SLC24A1	TRPM7	ordinary
PI4KB	ARF1	ordinary
PIK3C2A	VAC14	ordinary
ASNS	NARS	ordinary
RPS6KB1	EEF2K	ordinary
NLRX1	RNF135	ordinary
LIN9	RBL1	ordinary
ITPA	NT5C2	ordinary
ERAP1	TAPBP	ordinary
PPP2CB	SPRY2	ordinary
ALDH1A2	FABP5	ordinary
ARPC3	FZD4	ordinary
DUSP1	MAPK3	ordinary
USP15	KEAP1	ordinary
CSNK2B	NCAPG	ordinary
GNB4	CACNA1D	ordinary
LDLR	TFRC	ordinary
WASL	SYT9	ordinary
GLYATL1	ACSM2B	ordinary
ARFGAP1	COPZ2	ordinary
PEX2	UBE2D1	ordinary
MTMR14	PIGC	ordinary
COQ5	COQ7	ordinary
EDC4	LSM3	ordinary
AOX1	PRDX6	ordinary
KCNMB1	FXYD3	ordinary
ACOT13	HDAC8	ordinary
PPP2R2A	FOXM1	ordinary
TP53BP2	BBC3	ordinary
BOP1	KRR1	ordinary
LRP1	SDC3	ordinary
SLC6A12	ANO10	ordinary
PLA2G6	CYP2U1	ordinary
CHRM3	GNAQ	ordinary
PLD3	LIPH	ordinary
SLC30A7	SOD3	ordinary
EXOSC7	IMP4	ordinary
TULP3	PDE7A	ordinary
SLC36A4	IDO1	ordinary
SLC19A1	MTRR	ordinary
FZD5	DVL2	ordinary
ALS2	RAB5A	ordinary
ADCY2	PDE3B	ordinary
PI4K2A	SH3GL1	ordinary
GCAT	GLDC	ordinary
GGCX	VKORC1L1	ordinary
ACHE	SLC44A3	ordinary
ABCB10	FLVCR1	ordinary
ANO9	SLC26A6	ordinary
HAGH	CHAC1	ordinary
PIK3CG	PACSIN3	ordinary
PLXNA2	CDK5	ordinary
NFIA	POLR3GL	ordinary
TDP1	XRCC6	ordinary
CNOT7	EIF4E	ordinary
AGPAT5	PRELID3A	ordinary
SUPT16H	ATM	ordinary
RPS16	IMP3	ordinary
MLX	AGPAT1	ordinary
CIAO1	POLD1	ordinary
PIP4K2A	SH2D2A	ordinary
AKAP1	TPM2	ordinary
MAPK7	MEF2C	ordinary
DHPS	EIF5A2	ordinary
HBEGF	GPNMB	ordinary
PI4KA	PIK3C2A	ordinary
CALM3	IQGAP2	ordinary
FNBP1L	SCARB2	ordinary
SETD1A	ITGA2B	ordinary
ALOX5AP	LTA4H	ordinary
HSPA8	AP3B1	ordinary
SLC37A4	G6PC3	ordinary
RNF181	BCL10	ordinary
YWHAB	FAM114A2	ordinary
B3GNT5	MUC1	ordinary
RARRES3	PNPLA7	ordinary
HEXA	CTSA	ordinary
SREBF1	SCD	ordinary
GPT2	ALDH18A1	ordinary
TNFRSF10D	TNFRSF10A	ordinary
TNFRSF10C	TNFRSF10B	ordinary
PTPN1	STAT2	ordinary
CHPT1	PAFAH1B3	ordinary
BRCA1	LIG4	ordinary
ALG13	ALG1	ordinary
ISCU	AARS2	ordinary
B4GALT7	SDC1	ordinary
POLE	TOP3A	ordinary
TPST1	PODXL2	ordinary
TNFRSF10A	TNFRSF10D	ordinary
IDS	HEXB	ordinary
PGAM1	ENO1	ordinary
CAMK2G	EPB41L1	ordinary
NCOA2	ACOX1	ordinary
NCOR1	GFAP	ordinary
TADA2B	HIST2H2BE	ordinary
CD28	INPP5D	ordinary
PLXNA1	PAK1	ordinary
VRK2	TMPO	ordinary
SLC25A5	ATP6AP1	ordinary
CH25H	RXRA	ordinary
ARAP3	RHOJ	ordinary
ETHE1	SUOX	ordinary
WEE1	CCNE2	ordinary
CPT1B	SLC25A20	ordinary
NR1H2	VLDLR	ordinary
POM121C	KPNA1	ordinary
VPS4B	CHMP2A	ordinary
ITGA2	MET	ordinary
GLYAT	ACSM2A	ordinary
ALDH1A3	CRABP2	ordinary
TAB3	MAP2K4	ordinary
TP53	PIDD1	ordinary
SOD1	PRDX1	ordinary
USP33	CCP110	ordinary
ATM	ERCC3	ordinary
ERCC3	POLR2C	ordinary
GABPA	MTERF1	ordinary
MTA1	TAF1C	ordinary
NFIX	POLR1C	ordinary
RPS13	RPS9	ordinary
CDK2	MCM8	ordinary
AMER1	AXIN1	ordinary
HLA-DRB5	LCP2	ordinary
USP13	USP10	ordinary
NAA35	ACLY	ordinary
GNG11	CACNB3	ordinary
ANO10	SLC6A12	ordinary
ERCC1	RFC4	ordinary
AP2A2	GRIA4	ordinary
BCAT1	EGLN3	ordinary
PDK4	PDHB	ordinary
CDK7	TAL1	ordinary
MDM4	JMY	ordinary
WNT5A	FZD2	ordinary
RPS27L	DCAF13	ordinary
AKAP9	MYL6B	ordinary
PPARD	ACSL6	ordinary
ATP2B4	TPM3	ordinary
CDKN2D	CCND3	ordinary
E2F4	CDC25A	ordinary
GNA14	PRKCH	ordinary
BAG5	HSPA13	ordinary
STAM	PIP5K1A	ordinary
COQ9	COQ3	ordinary
SKP2	CUL1	ordinary
GGT5	DPEP2	ordinary
CLTC	AP1G1	ordinary
DUSP7	MAPK7	ordinary
HERC2	KDM4A	ordinary
SYK	PIK3CD	ordinary
SOD2	PRDX5	ordinary
MCM8	POLE2	ordinary
UBA52	POLD2	ordinary
TRPM7	SLC24A1	ordinary
STAT6	SOCS1	ordinary
DENND4C	CHM	ordinary
ST3GAL4	OGN	ordinary
KIF11	HLA-DPA1	ordinary
VKORC1L1	GGCX	ordinary
RPS23	DHX37	ordinary
GRIA4	NIPAL1	ordinary
RPS27	FBL	ordinary
CIAPIN1	NUBP1	ordinary
ABCA6	LCAT	ordinary
ATP6V1C2	AK7	ordinary
DRAP1	SMAD2	ordinary
FOXO1	RAG1	ordinary
INPP1	IMPA2	ordinary
SMPD4	VAPB	ordinary
MTX1	TOMM40	ordinary
SUV39H1	H2AFX	ordinary
POLD3	RPA1	ordinary
SYDE2	RHOBTB1	ordinary
CEBPD	KLF5	ordinary
XYLB	PPP2R5D	ordinary
SLC25A28	FECH	ordinary
PLEKHG5	RHOV	ordinary
HIP1	SYT11	ordinary
MAPKAP1	SGK1	ordinary
PDE7B	AMPD2	ordinary
SSU72	NABP2	ordinary
STEAP3	MCOLN1	ordinary
UNC13B	SLC22A2	ordinary
CLIP3	TRADD	ordinary
XIAP	TLE3	ordinary
TRAPPC8	RAB1A	ordinary
CEBPB	EBF1	ordinary
ANO5	SLC6A9	ordinary
ACSS1	HMGCS2	ordinary
SPTAN1	COPE	ordinary
RIPK2	CARD11	ordinary
CDC37	LRRFIP1	ordinary
ANK1	COPG1	ordinary
MAGT1	MMGT1	ordinary
ACTR5	DDB2	ordinary
PIGF	PIGK	ordinary
GNG2	CACNA1C	ordinary
GLB1L	GBA	ordinary
GPAM	AGPAT5	ordinary
RRAGB	MARS	ordinary
BMPR2	BMPR1B	ordinary
PLCE1	DGKG	ordinary
CA2	ATP6V0B	ordinary
LPL	APOE	ordinary
SMC6	STAG1	ordinary
ENO1	NANS	ordinary
LPCAT2	STARD7	ordinary
CLIC2	ANXA2	ordinary
TNFSF12	BIRC2	ordinary
XYLT2	SDC2	ordinary
SEPT7	CDC42EP3	ordinary
CACNB1	ATP2A1	ordinary
GEN1	XRCC3	ordinary
HLCS	ACACA	ordinary
ACVR2A	BMPR1A	ordinary
PRKCE	SHC1	ordinary
NUP107	PHAX	ordinary
PRDX1	TXN	ordinary
ACACA	ELOVL7	ordinary
AGO4	NOTCH2	ordinary
KIF15	HLA-DQA1	ordinary
PYCR1	PARS2	ordinary
TOPBP1	CHEK1	ordinary
KAT2A	TAF1D	ordinary
AMOTL2	YAP1	ordinary
IL27RA	TYK2	ordinary
MTMR3	PI4KA	ordinary
IL2RA	IL2RB	ordinary
TPCN2	LMOD1	ordinary
RPS5	SNU13	ordinary
ACSS2	ACAT2	ordinary
RGS9	PDE6G	ordinary
AGPAT4	CDS1	ordinary
MEF2D	PPARGC1A	ordinary
CRAT	NUDT7	ordinary
SLC25A37	ISCU	ordinary
HEXB	NEU1	ordinary
ADRA2C	GNG11	ordinary
TMEM129	UBE2J2	ordinary
CCNG1	MDM2	ordinary
PDGFA	PDGFRA	ordinary
RPS24	NOC4L	ordinary
VPS28	PPIA	ordinary
MADD	RAB27B	ordinary
TAB2	S100B	ordinary
FZD7	PARD6A	ordinary
AASS	GLUD1	ordinary
CASP3	STK4	ordinary
SLC35C1	FUT3	ordinary
RPS28	HEATR1	ordinary
IL1RL1	KL	ordinary
PRKCH	GNAZ	ordinary
PLK4	RAB8A	ordinary
YME1L1	SMDT1	ordinary
PLCG1	DGKD	ordinary
SLC12A7	SLC12A2	ordinary
LRP6	FZD6	ordinary
PIGB	PIGF	ordinary
DDX58	CASP8	ordinary
PNPLA4	RETSAT	ordinary
PROC	FGA	ordinary
GALNT15	MUC3A	ordinary
SPTLC2	KDSR	ordinary
IMPDH1	GMPS	ordinary
ABCC1	GGT5	ordinary
AMDHD2	GNPDA1	ordinary
PIK3CD	NECAP2	ordinary
NFS1	MOCS3	ordinary
PEX12	UBE2D3	ordinary
CDC14B	MAPK6	ordinary
MVB12A	UBA52	ordinary
KCNAB1	ATP1A1	ordinary
NOL12	DIEXF	ordinary
HIST2H2BE	EYA4	ordinary
PPIB	COL4A1	ordinary
DDAH2	ASS1	ordinary
MIB2	JAG2	ordinary
TLL1	LOX	ordinary
FXN	GPT2	ordinary
IDH3A	TMLHE	ordinary
FYN	FCER1G	ordinary
RAB14	EXOC5	ordinary
THTPA	SLC25A19	ordinary
POLD4	BLM	ordinary
BEST4	CA4	ordinary
TSTA3	SLC35C1	ordinary
CACNB4	UNC13B	ordinary
USP4	TAB2	ordinary
PSMA1	LTB	ordinary
PSMD6	UBE2E1	ordinary
DLG3	SLC8A1	ordinary
THBD	PROCR	ordinary
RORA	SREBF1	ordinary
SBF1	PIGP	ordinary
PLA2G4C	LPCAT4	ordinary
GOT1	SLC25A13	ordinary
BAG4	HSPA4L	ordinary
IRAK3	TLR2	ordinary
MARC2	NOS2	ordinary
SARDH	GARS	ordinary
HEY2	HEYL	ordinary
PNPLA3	GK	ordinary
POFUT2	ADAMTS1	ordinary
SNAP25	DNAJC5	ordinary
MUS81	KAT5	ordinary
VNN2	PANK3	ordinary
ACAT2	HMGCS1	ordinary
CACNA2D4	DMD	ordinary
PGM2L1	PGK1	ordinary
POLD1	RPA3	ordinary
VCL	MAPK1	ordinary
ABCD4	ABCC1	ordinary
MED25	CEBPA	ordinary
DNM1	AP2B1	ordinary
DBF4	MCM2	ordinary
GANAB	CANX	ordinary
SCMH1	CBX4	ordinary
ATP6V1A	ARL2	ordinary
ALDH2	ACSS3	ordinary
ETFDH	ETFA	ordinary
SLC12A4	SLC4A3	ordinary
FANCG	FANCI	ordinary
SLC11A2	FTL	ordinary
GUK1	TTC21B	ordinary
SACM1L	PIGA	ordinary
ADCY3	PDE2A	ordinary
MED11	LPL	ordinary
SIRT3	IDH2	ordinary
CACNA1F	SLC24A4	ordinary
BLM	FAAP24	ordinary
SLC44A2	CHKB	ordinary
PCOLCE	LOXL1	ordinary
INO80C	RBX1	ordinary
CYB5R4	FTH1	ordinary
SLC7A11	GCLM	ordinary
DLAT	CS	ordinary
SLC22A15	AKAP9	ordinary
LRRFIP1	NCKAP1	ordinary
BCO1	DHRS4	ordinary
SGPL1	ALDH3B1	ordinary
SEC24D	SEC31A	ordinary
LTBR	TRAF3	ordinary
PDK3	PDHA1	ordinary
NR3C1	PTK6	ordinary
MRGBP	HIST1H2AC	ordinary
DNA2	UVSSA	ordinary
SIAH2	SNCAIP	ordinary
EXOSC8	UTP6	ordinary
ORC6	POLE4	ordinary
TRPM4	SLC9A8	ordinary
C4A	C4B	ordinary
AGBL2	LRRC49	ordinary
TGS1	SNRPF	ordinary
ARPC1A	LDLRAP1	ordinary
MRM1	SLC25A26	ordinary
CD274	HLA-DPB1	ordinary
INO80B	RAD23B	ordinary
ISG15	KPNA2	ordinary
PPP1CC	CRY2	ordinary
LRAT	MYO7A	ordinary
WDR20	AR	ordinary
NECAP2	VAMP3	ordinary
SLC39A1	S100A9	ordinary
GMPPA	DPM3	ordinary
RRP1	TBL3	ordinary
CCND2	E2F3	ordinary
SAV1	LATS1	ordinary
GPD1	GPAT2	ordinary
HIST1H2BN	KDM4B	ordinary
HDAC3	NPAS2	ordinary
C4B	C4A	ordinary
BLNK	DAPP1	ordinary
EPHA3	EFNA1	ordinary
TSNAX	AGO2	ordinary
PLG	PDGFD	ordinary
RPS11	DDX49	ordinary
C2	C5	ordinary
KIF2C	HLA-DQB2	ordinary
SLC5A4	HK3	ordinary
CBFB	SOCS3	ordinary
MTX2	VDAC1	ordinary
AXIN1	LRP5	ordinary
ANK3	TMED7	ordinary
GGCT	CARS	ordinary
CHAC2	OPLAH	ordinary
ADAMTS4	ACAN	ordinary
HDAC7	PML	ordinary
CDK5R1	CDC25B	ordinary
SLC6A8	CKMT2	ordinary
MET	MYO18A	ordinary
GBF1	COPB2	ordinary
LPIN1	PNPLA2	ordinary
DHRS9	ALDH1A3	ordinary
VAMP7	SH3D19	ordinary
CYP4F3	CYP4F11	ordinary
PPP6C	SEC24B	ordinary
PPARGC1A	ESRRA	ordinary
DDC	LRTOMT	ordinary
IRF3	TBK1	ordinary
NEU1	SLC17A5	ordinary
SIGIRR	TLR6	ordinary
RPS15A	RPS7	ordinary
GRIN2D	SLC24A3	ordinary
EME2	BRIP1	ordinary
AAK1	TF	ordinary
ITCH	NOD1	ordinary
APAF1	CASP7	ordinary
LDLRAP1	LDLR	ordinary
HBS1L	PPAT	ordinary
CENPE	ACTR1A	ordinary
GNAI2	CD209	ordinary
TEAD1	CTGF	ordinary
CDC7	MCM6	ordinary
CAPZA1	HSP90AB1	ordinary
NEDD4L	UBC	ordinary
MDM2	DYRK2	ordinary
MAPK11	CBX2	ordinary
PPP2R3B	RB1	ordinary
LY96	IRF7	ordinary
ACOT2	GCAT	ordinary
PIGM	PIGN	ordinary
KAT2B	HES1	ordinary
ACOT4	SLC27A2	ordinary
EXO1	FAAP100	ordinary
BPNT1	NSF	ordinary
NCOA1	G0S2	ordinary
ALDH1B1	ACSS1	ordinary
NRP1	DPYSL2	ordinary
MYO7A	RDH11	ordinary
PINK1	MFN2	ordinary
CD3EAP	HIST1H2BC	ordinary
ACAT1	PCCA	ordinary
NLK	TCF7L2	ordinary
ERLIN2	GAB1	ordinary
DPH3	MTAP	ordinary
NOD1	MAP2K3	ordinary
PFKM	ALDOB	ordinary
SLC39A14	C1QBP	ordinary
LIPA	APOB	ordinary
LHPP	SLC25A10	ordinary
HELZ2	FHL2	ordinary
PHB	KSR1	ordinary
FKBP1A	NFATC1	ordinary
FGFR2	WASF2	ordinary
SLC44A4	CHKA	ordinary
MAP3K11	ARAF	ordinary
CAST	CDK5R1	ordinary
P4HA2	COL5A1	ordinary
NAGLU	GUSB	ordinary
GUSB	GLB1	ordinary
AOC3	PXDN	ordinary
LYN	CD22	ordinary
EFNA1	NGEF	ordinary
ANO7	SLC6A13	ordinary
TRMT112	GSPT1	ordinary
SLC19A2	TPK1	ordinary
CSNK2A2	NCAPH	ordinary
CD22	CD79B	ordinary
HEYL	HEY2	ordinary
LPIN3	DGAT2	ordinary
HADHB	PLA2G6	ordinary
SCNN1D	CAMK2D	ordinary
SLC25A12	PAICS	ordinary
IPMK	IP6K2	ordinary
ANKLE2	BANF1	ordinary
USP34	TNKS	ordinary
ARHGAP11A	RHOA	ordinary
EGFR	PXN	ordinary
MSRA	AIMP2	ordinary
SCN4B	SLC4A7	ordinary
THEM4	ACSM1	ordinary
TRIP10	LRP2	ordinary
CHCHD4	TIMM8A	ordinary
C1R	C1S	ordinary
EVC	SUFU	ordinary
EXOSC2	RCL1	ordinary
SUMF1	ARSD	ordinary
SPHK1	PLPP1	ordinary
SCP2	CRAT	ordinary
PLCD1	PRKCD	ordinary
MMP9	COL16A1	ordinary
SMC4	NCAPG2	ordinary
STAT2	STAT1	ordinary
ARHGEF7	PAK3	ordinary
RPS8	RRP9	ordinary
IL2RG	JAK3	ordinary
KL	FGFR1OP2	ordinary
SMC2	NCAPD3	ordinary
SHMT1	ALDH9A1	ordinary
ATG9B	ATG14	ordinary
SLC25A4	ATP6V1E1	ordinary
PAH	YARS	ordinary
TAX1BP1	XIAP	ordinary
TRAF1	TNFRSF1A	ordinary
DENND4B	GDI1	ordinary
RANBP2	KPNB1	ordinary
PRPS2	QPRT	ordinary
NCK2	MAPK11	ordinary
VAPB	COL4A3BP	ordinary
ITPR2	STIM1	ordinary
ARHGEF10	RHOBTB2	ordinary
PRKCSH	CALR	ordinary
RAPGEF2	HRAS	ordinary
ADSS	ADSL	ordinary
EGR2	CEBPB	ordinary
CCNB2	KIF2C	ordinary
TFAP2A	TGFA	ordinary
PEX3	ABCD3	ordinary
PLK1	PKMYT1	ordinary
PDK2	DLD	ordinary
PGK1	GAPDH	ordinary
SLC8A1	ORAI2	ordinary
[truncated: 542 more rows]

## Sheet: KIRP
gene1	gene2	type
SQLE	LSS	critical
EIF2AK3	EIF2S1	critical
HACL1	ALDH3A2	critical
ITGA4	ITGAL	critical
GART	PFAS	critical
RPS6KA5	ATF1	critical
ITGAL	ITGA4	critical
FOXM1	CENPF	critical
COL18A1	MMP9	critical
FUOM	FUK	critical
HMGB1	DFFB	critical
ABAT	ALDH5A1	critical
MCAT	NDUFAB1	critical
DPYD	DPYS	critical
SLC31A1	ATP7B	critical
ACO1	IDH1	critical
RGS9	PDE6B	critical
AMY2B	MGAM	critical
PRKG2	MRVI1	critical
FDX1	FDXR	critical
PDSS2	COQ2	critical
COX10	COX15	critical
SC5D	DHCR7	critical
DAO	GRHPR	critical
SLC22A13	NAPRT	critical
MMP19	LAMA3	critical
HPD	HGD	critical
TJP1	GJA1	critical
BABAM1	NLRP3	critical
PCBD1	QDPR	critical
KMT5A	PHF8	critical
PRMT3	RPS2	critical
SLC25A1	ACO1	critical
HMGCR	MVK	critical
DOLPP1	DPM2	critical
IHH	SMURF1	critical
ACADL	ACADM	critical
USP44	CDC20	critical
CHEK1	WEE1	critical
KMO	KYNU	critical
CISH	IL7	critical
ZNF385A	SFN	critical
ALAD	HMBS	critical
GALT	GALE	critical
HMGCS1	HMGCR	critical
SORD	XYLB	critical
CS	ACO2	critical
CP	HEPH	critical
IDO1	AFMID	critical
FOXO3	SOD2	critical
FOXO1	RAG1	critical
ITGAV	SHB	critical
CEBPB	KLF5	critical
PIGL	PIGW	critical
CEBPD	EBF1	critical
EBP	SC5D	critical
PECR	PHYH	critical
SH2B1	GHR	critical
NANS	NANP	critical
SOCS2	IL2RG	critical
ADAM9	COL17A1	critical
MAPK10	JUN	critical
PHYH	HACL1	critical
SIAH1	SNCA	critical
AZIN2	AGMAT	critical
TRAF6	ITGB3BP	critical
CPOX	PPOX	critical
TAB2	GFAP	critical
BAP1	HCFC1	critical
ATF2	MSH2	critical
MOCS2	GPHN	critical
MOCS1	MOCS2	critical
SIRT3	IDH2	critical
PROC	F13A1	critical
METTL22	KIN	critical
THBD	PROCR	critical
ACAT2	HMGCS1	critical
HMGB2	H1F0	critical
GCH1	PTS	critical
EEF1A2	EEF1A1	critical
SLC27A2	AMACR	critical
ITCH	NOD2	critical
SLC7A7	SLC3A1	critical
CTSK	MMP7	critical
CYP46A1	CYP39A1	critical
PPME1	PPP2R2A	critical
PCYT1A	CHPT1	critical
NMT1	BID	critical
KITLG	KIT	critical
SLC2A5	KHK	critical
ECHS1	HADH	critical
HIPK2	CBFB	critical
USP45	ERCC1	critical
CHAC1	OPLAH	critical
SARDH	GLDC	critical
AKR1A1	CRYL1	critical
ADHFE1	D2HGDH	critical
CYP17A1	CYP21A2	critical
ALOX12	GPX4	critical
CRK	KIDINS220	critical
PRKCZ	SPHK1	critical
TSNAX	AGO2	critical
LSS	CYP51A1	critical
CTSD	COL18A1	critical
SH2D2A	AXL	critical
PGK1	GAPDH	critical
PNPLA7	GPCPD1	critical
SAE1	UBA2	critical
PIAS4	MTA1	critical
FOS	IGFBP7	critical
ATG12	ATG10	critical
ATG13	AMBRA1	critical
LIPT2	GCSH	critical
LIPT1	DHTKD1	critical
PF4V1	PROC	critical
IL1B	SQSTM1	critical
NLRX1	MAVS	critical
GSTZ1	FAH	critical
RRM2	GLRX	critical
SLC44A1	CHDH	critical
CD22	CD79B	critical
TIMP2	MMP2	critical
LGR4	RNF43	critical
USP10	SNX3	critical
DENND2A	RAB9A	critical
CPT2	ACADVL	critical
AFMID	KMO	critical
ACADS	ECHS1	critical
SLC7A6	SLC7A9	critical
CYP27B1	CYP24A1	critical
CDS2	PGS1	critical
CRYM	PIPOX	critical
ELOVL5	FADS1	critical
NSDHL	HSD17B7	critical
QDPR	AGMO	critical
FADS1	ELOVL5	critical
IDUA	SGSH	critical
TRIM21	DDX41	critical
STAT5B	BRWD1	critical
HDC	HNMT	critical
DECR1	ECI1	critical
CARNS1	CARNMT1	critical
HCFC1	TFB1M	critical
USP18	EIF2AK2	critical
INPP1	IMPA2	critical
HMBS	UROS	critical
PAPPA	IGFBP5	critical
MMP15	NID1	critical
MAPK9	ATF2	critical
MTHFD1L	MTFMT	critical
OTUD5	RNF135	critical
DOLK	DPAGT1	critical
TBC1D25	RAB33B	critical
ALG11	RFT1	critical
ALG13	ALG1	critical
CAT	NUDT12	critical
ACADM	DECR1	critical
CDC25B	CDK2	critical
ENOPH1	ADI1	critical
PGS1	PTPMT1	critical
AGXT2	HIBADH	critical
HGD	GSTZ1	critical
ARSA	GALC	critical
ATP7A	ATOX1	critical
LCMT1	PPP2R3B	critical
PKN1	PPP1R14A	critical
ECSIT	MAP3K1	critical
MTHFD2	MTHFD2L	critical
MTHFD1	ALDH1L1	critical
ADSL	ATIC	critical
HPGDS	AKR1C3	critical
GNB5	PDE6G	critical
NUDT14	PGM2	critical
NAE1	UBA3	critical
UROS	UROD	critical
TSPO	FDX1	critical
PUM2	DCUN1D3	critical
GDPD3	GDPD5	critical
TGFB1	ZFHX3	critical
ST8SIA4	NCAM1	critical
AURKA	PHLDA1	critical
GLO1	HAGH	critical
HRASLS5	GDPD3	critical
PDXK	PNPO	critical
CERK	CPTP	critical
JAK3	IL4R	critical
RUNX2	LGALS3	critical
VCPKMT	VCP	critical
SMURF2	KEAP1	critical
JUN	KDM6B	critical
MMAB	MUT	critical
DCPS	NT5C3B	critical
RENBP	NAGK	critical
SLC22A2	MAOA	critical
KYNU	HAAO	critical
DENND3	RAB12	critical
PMVK	MVD	critical
MAN2B2	MANBA	critical
MAN2B1	MAN2B2	critical
GLRX3	ALAD	critical
LYRM4	AARS2	critical
UPB1	CARNS1	critical
CYBRD1	SLC11A2	critical
NFS1	MOCS3	critical
GNS	HEXB	critical
MANEA	B4GALT1	critical
NAT8	BACE1	critical
AMT	SHMT2	critical
GNPNAT1	PGM3	critical
TLL1	COL27A1	critical
ASPA	PAICS	critical
MTHFD2L	MTHFD2	critical
RNF152	RRAGA	critical
PGLS	PGD	critical
RNF144A	UBE2L3	critical
GCLM	GSS	critical
GCLC	GGCT	critical
SGPL1	ALDH3B1	critical
DMPK	PLN	critical
PNPO	GSTP1	critical
GRB10	INSR	critical
HSD17B12	SRD5A1	critical
SLC17A3	SLC22A12	critical
AMD1	SMS	critical
HAAO	ACMSD	critical
MPDU1	ALG9	critical
EPHA2	EFNA5	critical
ZDHHC2	CKAP4	critical
SLC6A18	TTLL3	critical
POLB	PARP1	critical
CFI	CR1	critical
ALDH9A1	BBOX1	critical
BPHL	VARS	critical
YAP1	ITCH	critical
RFT1	ALG3	critical
NGFR	SMPD2	critical
ECI1	MECR	critical
HGS	STAM2	critical
FGR	LRP8	critical
PIGM	PIGN	critical
HPSE	IDUA	critical
ALDH1L1	SHMT1	critical
ALG9	ALG6	critical
CYB5R3	CYB5A	critical
ALG2	ALG11	critical
ALG3	MPDU1	critical
ALG6	ALG8	critical
FUK	FPGT	critical
ITPKB	ITPK1	critical
CSK	PDCD1	critical
C1QBP	KLKB1	critical
BACE1	APP	critical
HVCN1	DUOX1	critical
USP7	FOXO4	critical
GMDS	TSTA3	critical
KLKB1	F12	critical
TOMM40	PINK1	critical
RANBP10	RANBP9	critical
CERS5	DEGS2	critical
APIP	ENOPH1	critical
PTPMT1	CRLS1	critical
PGM3	UAP1	critical
KIT	SH2B2	critical
MTF1	CSRP1	critical
CHAC2	CNDP2	critical
PPRC1	TFAM	critical
DPYS	UPB1	critical
GALK1	GALT	critical
SLC11A2	FTL	critical
HBEGF	GPNMB	critical
ZBED1	CHD3	critical
PHGDH	PSAT1	critical
PPCDC	COASY	critical
ENPP1	ACP5	critical
ADI1	GOT1	critical
HYKK	PHYKPL	critical
G6PD	PGLS	critical
IDS	HEXA	critical
USP19	RNF123	critical
NPM1	NOP2	critical
ALG1	ALG2	critical
MSMO1	NSDHL	critical
GCAT	GARS	critical
GLUD2	CPS1	critical
MCEE	MMAA	critical
MTAP	APRT	critical
DMGDH	SARDH	critical
CDK11B	CEP131	ordinary
HIST1H2BN	EYA3	ordinary
ITPR3	MYL6B	ordinary
SYT11	ARPC1A	ordinary
INPP4B	MTMR9	ordinary
DOHH	EIF5A	ordinary
CD3G	CD28	ordinary
UBA52	POLD2	ordinary
SRI	ATP2B4	ordinary
UNC13B	BCHE	ordinary
CDC42	SPC24	ordinary
EXOSC6	NOP56	ordinary
PDPK1	RPS6KA3	ordinary
TOP3A	LIG3	ordinary
EXOSC9	MPHOSPH10	ordinary
CACNB1	ATP2A1	ordinary
PPFIA1	ARL6IP5	ordinary
CACNA1D	CATSPER2	ordinary
MCOLN3	SORBS1	ordinary
COPS8	KLHL5	ordinary
WRN	REV3L	ordinary
PSMC2	CDC23	ordinary
CAMK2B	IFNGR2	ordinary
RB1	MCM7	ordinary
PIK3R4	PIKFYVE	ordinary
AKT2	GSK3A	ordinary
CDK1	NDC80	ordinary
RDH10	HSD17B1	ordinary
PSMA3	CDC26	ordinary
TNKS2	PTEN	ordinary
MYH7B	EXOC3	ordinary
CLTC	AP1G1	ordinary
RABGGTB	RAB17	ordinary
TRPC4AP	ITGB5	ordinary
FRS2	CPSF6	ordinary
GRAP2	RASGRP4	ordinary
ERBB3	FGFR1OP	ordinary
NRAS	KIAA1549	ordinary
SHC1	PAK2	ordinary
CACNB2	ORAI1	ordinary
PSMB7	ANAPC2	ordinary
PPP2R5A	YWHAB	ordinary
KRAS	BRAP	ordinary
GNG10	ITPR1	ordinary
HSP90AB1	HBEGF	ordinary
PSEN2	EPHB3	ordinary
EPHB4	EFNB2	ordinary
RMI1	FAAP24	ordinary
ERBB2	PLXNB1	ordinary
CNTRL	ABI2	ordinary
H2AFZ	NCAPH2	ordinary
CAMK2D	MYO6	ordinary
SLC24A3	P2RX7	ordinary
BRAP	BRAF	ordinary
FGFR4	FRS3	ordinary
RPS13	RPS14	ordinary
LAMTOR5	EEF1E1	ordinary
SPCS1	RPL15	ordinary
SMAD4	BCL2L11	ordinary
CDKN2B	CCND2	ordinary
SLC9A1	AKAP9	ordinary
CDKN1B	ORC6	ordinary
CDC37	LRRFIP1	ordinary
LCK	TYROBP	ordinary
RNF8	CHEK2	ordinary
GNG2	RASGRP3	ordinary
GAB2	WASF2	ordinary
AP2S1	GRIP2	ordinary
ARF6	FCHO2	ordinary
CLTCL1	EGF	ordinary
ANGPTL4	GPIHBP1	ordinary
COPS3	DTL	ordinary
NECAP1	M6PR	ordinary
INPP4A	MTMR14	ordinary
RABGGTA	RAB24	ordinary
RAB18	DYNC1I2	ordinary
CA13	ATP6V1H	ordinary
ATP6V1E1	TSPAN7	ordinary
SPTBN4	TMED3	ordinary
VDAC3	MICU3	ordinary
HAGH	BSG	ordinary
FZD2	AMER1	ordinary
PARD6A	PRICKLE1	ordinary
FAM20C	LGALS1	ordinary
EIF4G1	UPF1	ordinary
NCALD	SRI	ordinary
CD247	ITK	ordinary
MBTPS2	CREB3L2	ordinary
HENMT1	TDRKH	ordinary
PSMB1	OAZ1	ordinary
ARHGEF9	AGT	ordinary
RHOB	PKN1	ordinary
NFRKB	COPS4	ordinary
IGF2R	PLIN3	ordinary
TIMM50	HSCB	ordinary
ATP2B1	ATP2A2	ordinary
AP2A1	FZD5	ordinary
TFRC	PIP5K1B	ordinary
AAK1	ACTR2	ordinary
CD4	PIP5K1C	ordinary
JAK1	IL6ST	ordinary
AKT1	FOXO1	ordinary
FKBP1B	DYSF	ordinary
VAMP8	PUM1	ordinary
SPTBN5	TMED9	ordinary
FRAT1	PPP2R1B	ordinary
PPP2R5C	KSR1	ordinary
SPCS3	RPN2	ordinary
SLC26A6	ANO9	ordinary
NCL	HEATR1	ordinary
PSMD11	BLMH	ordinary
RAB8A	EXOC7	ordinary
HIST1H2BK	HIST1H4I	ordinary
CARM1	TRIB3	ordinary
BAG4	HSPA4L	ordinary
HSPA9	HSPD1	ordinary
SUPT5H	SNAPC4	ordinary
PSMC4	SPOP	ordinary
PSMD9	ANAPC5	ordinary
ESPL1	BUB1	ordinary
HLA-DRA	CD3G	ordinary
CNOT6L	EIF4B	ordinary
H2AFX	EYA2	ordinary
RHOC	PKN2	ordinary
EPN2	ITSN2	ordinary
IRS1	TRIM24	ordinary
POM121	XPO1	ordinary
PSMD6	UBE2E1	ordinary
ANAPC16	FZR1	ordinary
PSMD8	RNF146	ordinary
CNOT1	EIF4G1	ordinary
GTF2H1	NCBP1	ordinary
CHML	RAB23	ordinary
GNG11	CACNB3	ordinary
ZMYM2	SOS1	ordinary
MBOAT7	PITPNM1	ordinary
PIK3C3	FIG4	ordinary
OSTM1	ANO8	ordinary
CLTA	BLOC1S1	ordinary
UBE2D1	SMAD9	ordinary
KLHL12	DVL1	ordinary
PLCD1	PRKCD	ordinary
SYNJ1	SBF2	ordinary
NUP62	KPNA4	ordinary
UBE2M	FBXW11	ordinary
ACOT9	ACAT1	ordinary
SLC25A11	VHL	ordinary
PSMD13	TNFRSF12A	ordinary
CCT8	BBS5	ordinary
ABCA5	ABCA10	ordinary
ABCA2	SULT2B1	ordinary
RPS5	SNU13	ordinary
UBC	RFC3	ordinary
VAV2	ITPR3	ordinary
PSME1	BUB3	ordinary
MAPK3	RPS6KA5	ordinary
RAB13	MYO1C	ordinary
CALM3	IQGAP2	ordinary
SLC38A2	CTPS2	ordinary
GFPT1	GNPNAT1	ordinary
MAP2K3	MAPKAPK3	ordinary
MAPKAPK2	ZFP36	ordinary
PSMA2	ANAPC16	ordinary
ADCY3	RAPGEF4	ordinary
NFIX	POLR1C	ordinary
IL2RA	IL2RB	ordinary
CHST1	FMOD	ordinary
CYB5R1	FTH1	ordinary
LOXL2	PXDN	ordinary
GPSM2	S1PR1	ordinary
SEC23A	GOSR2	ordinary
PSMF1	BUB1B	ordinary
PLA2G6	CYP2U1	ordinary
COPS5	COMMD5	ordinary
GNAL	HCN3	ordinary
PRKACA	LIPE	ordinary
FGFR1OP2	ABI1	ordinary
DENND4B	GDI1	ordinary
HSD17B7	EBP	ordinary
DHCR24	SREBF2	ordinary
PTK6	ARHGAP35	ordinary
GFPT2	BCAT1	ordinary
GNG5	CACNA1C	ordinary
GNAS	PRKAR2B	ordinary
COPS2	FBXL4	ordinary
MYO18A	PDPK1	ordinary
FGF2	FRS2	ordinary
PAK1	CTNND1	ordinary
GNAI2	CD209	ordinary
UBE2N	PELI1	ordinary
RPA2	HSPA1L	ordinary
GNG12	CACNA2D2	ordinary
COASY	SLC25A16	ordinary
MORC2	NAA30	ordinary
BRAF	AGK	ordinary
CACNA2D3	TPM3	ordinary
FGFR1OP	INPPL1	ordinary
BCAT1	EGLN3	ordinary
CD3D	ZAP70	ordinary
DLG4	PPP3CB	ordinary
VDAC2	MICU1	ordinary
NUP188	SNRPF	ordinary
ELOVL6	HSD17B12	ordinary
ACSL5	ZDHHC21	ordinary
GTF2H2	POLR2D	ordinary
COPS7A	SPSB2	ordinary
PSMA5	CKS1B	ordinary
RYR3	TMOD1	ordinary
CD28	NCKAP1L	ordinary
TRIM24	TEC	ordinary
DGAT1	PNPLA4	ordinary
PPP3R1	YWHAQ	ordinary
BARD1	FANCL	ordinary
GTF2H5	POLR2I	ordinary
SLC6A6	BEST1	ordinary
ANO5	SLC6A9	ordinary
GNB4	CACNA1D	ordinary
PLCG2	INPP5B	ordinary
PIP5K1B	NTN1	ordinary
SYK	PIK3CD	ordinary
ASRGL1	FARSA	ordinary
TLR1	SNAP23	ordinary
IRAK2	IKBKG	ordinary
FCHO2	AP2M1	ordinary
PSMA7	NUMB	ordinary
INPP5K	EPN2	ordinary
STAM	PIP5K1A	ordinary
ADCY5	RAPGEF3	ordinary
SRSF10	HNRNPH1	ordinary
NUPL2	CPSF4	ordinary
NUP160	CPSF2	ordinary
PSMD5	CDC27	ordinary
PIK3CA	PICALM	ordinary
DAPP1	DGKZ	ordinary
GNB1	INPP5A	ordinary
LCP2	PRKCB	ordinary
GNAO1	ITPR2	ordinary
PRKCQ	GNB5	ordinary
SLC39A10	S100A8	ordinary
FYN	FCER1G	ordinary
USP21	RNF31	ordinary
TAB3	MAP3K7	ordinary
MUS81	KAT5	ordinary
RBBP8	FANCC	ordinary
PPARD	ACSL6	ordinary
RPS3A	UTP18	ordinary
NEK9	NUP205	ordinary
NUP35	GEMIN6	ordinary
NAA38	SLC27A5	ordinary
CA3	AQP11	ordinary
ATP6V1C1	PYGB	ordinary
GBA2	SLC2A1	ordinary
SMAD3	CDKN2B	ordinary
AMPD2	IMPDH1	ordinary
PPAT	GART	ordinary
FNBP1L	SCARB2	ordinary
EXOSC7	IMP4	ordinary
SLC35D1	UGT2B7	ordinary
SPCS2	SEC61G	ordinary
ATM	ERCC3	ordinary
PSME3	TPP2	ordinary
RELB	NFKB2	ordinary
RGS3	GNA11	ordinary
GNAQ	DGKH	ordinary
GUCY1B3	PRKG1	ordinary
RBBP4	ING5	ordinary
RFC3	PALB2	ordinary
ISG15	KPNA2	ordinary
SEC11A	RPS17	ordinary
CDIPT	PIGQ	ordinary
UBB	RFC5	ordinary
RFC1	NBN	ordinary
CDC25A	CCNE1	ordinary
PSMC6	SKP2	ordinary
RAB10	EXOC2	ordinary
ITPKC	INPP5J	ordinary
ASPH	MYH11	ordinary
SEC24C	SEC23IP	ordinary
PPP2R5E	MARK3	ordinary
METTL3	POLR2H	ordinary
POLR2D	BRCA1	ordinary
ITSN2	INPP4A	ordinary
PGM1	SLC37A2	ordinary
ARHGAP15	RHOH	ordinary
RIOK3	TSR1	ordinary
AKT3	FOXO3	ordinary
ATP6V0B	AK9	ordinary
CLIC2	ANXA2	ordinary
MTMR1	PIP4K2C	ordinary
PIK3C2B	FNBP1L	ordinary
ABL1	CDKN1C	ordinary
FZD4	ARPC3	ordinary
SLC4A7	NCOA2	ordinary
SLC5A6	PANK2	ordinary
AKAP1	TPM2	ordinary
TLN1	PTK2	ordinary
IMPDH1	GMPS	ordinary
PIP4K2A	SH2D2A	ordinary
NECAP2	VAMP3	ordinary
KPNA1	PSIP1	ordinary
HELZ2	TXNRD1	ordinary
NUP214	SNRPB	ordinary
SEC24D	SEC31A	ordinary
ARF4	COPB1	ordinary
GNB2	CACNB2	ordinary
CACFD1	MYL5	ordinary
FTCD	RIMKLA	ordinary
TRPV2	TLN1	ordinary
GPSM1	CXCL16	ordinary
TOMM20	ATP5A1	ordinary
PRKACB	NCK2	ordinary
CALM2	IQGAP3	ordinary
PCF11	RPAP2	ordinary
BAG5	HSPA13	ordinary
TPR	WDR33	ordinary
NBN	TCEA1	ordinary
PAFAH1B1	BICD2	ordinary
SLC35B3	TPST2	ordinary
PIK3CG	SGIP1	ordinary
SNX9	WNT5A	ordinary
EP400	UBN1	ordinary
PRKAB1	TBC1D1	ordinary
GUCY1A3	PDE5A	ordinary
CPSF6	CYFIP2	ordinary
PEX10	PEX5	ordinary
UBE2D3	SMAD5	ordinary
CPLX1	HSPA8	ordinary
SLC1A1	TTLL11	ordinary
NUP93	SNRPG	ordinary
MTMR14	PI4KA	ordinary
NUP43	KPNA5	ordinary
HLA-DRB1	CD3D	ordinary
RBL2	E2F1	ordinary
P4HA2	COL5A1	ordinary
NUP50	CPSF3	ordinary
RYR1	ANXA6	ordinary
LRRFIP1	NCKAP1	ordinary
DVL3	IL1RAP	ordinary
PTK2B	VEGFA	ordinary
VEGFA	ROCK1	ordinary
GNGT2	FGF1	ordinary
UBE2V1	MYD88	ordinary
ARFGAP3	USO1	ordinary
SLC4A2	CLCN2	ordinary
PSMD1	CUL3	ordinary
MDC1	TP53BP1	ordinary
HERC2	KDM4A	ordinary
METAP1	MAT2B	ordinary
HLA-E	FCGR3A	ordinary
DYNC1H1	HSP90AA1	ordinary
ARF1	COPZ1	ordinary
GOT1	SLC25A13	ordinary
PSMD2	TNFSF12	ordinary
ARNT	CA9	ordinary
POM121C	KPNA1	ordinary
PI4K2A	SH3GL1	ordinary
PIK3R1	ITSN1	ordinary
PSMB6	ANAPC11	ordinary
ITK	RASGRP1	ordinary
GNAI1	TRPM2	ordinary
TSC1	MTOR	ordinary
GNAZ	PRKAR2A	ordinary
TTF1	TAF1A	ordinary
ADCY9	PDE8A	ordinary
SKP1	BTRC	ordinary
SLC25A13	ASNS	ordinary
CBLB	NCK1	ordinary
GOT2	DARS2	ordinary
PSMA6	MAD2L1	ordinary
RBL1	CDK1	ordinary
MTM1	VAC14	ordinary
CLCN4	SLC12A6	ordinary
SLC12A6	ATP1B3	ordinary
PSMD10	ANAPC10	ordinary
SLC25A16	ALDH6A1	ordinary
HRAS	MACF1	ordinary
PIK3R3	ARRB1	ordinary
MCOLN1	ACTG2	ordinary
ORAI1	MYL6	ordinary
ANO6	SLC6A6	ordinary
GDPD5	SLC44A1	ordinary
GPAT4	GPAT3	ordinary
IRS2	WASF1	ordinary
MMP9	COL16A1	ordinary
EPHB6	TIAM1	ordinary
P4HA1	COL7A1	ordinary
LPCAT2	STARD7	ordinary
PLD1	DDHD1	ordinary
CEPT1	PTDSS2	ordinary
PLD6	TRIAP1	ordinary
GPS1	COMMD4	ordinary
LRP1	SDC3	ordinary
RAB11A	EXOC1	ordinary
TNFSF12	BIRC2	ordinary
PAFAH1B2	DYNC1LI2	ordinary
CDK6	TFDP2	ordinary
TFDP1	RRM2	ordinary
AP2B1	ROR1	ordinary
P3H2	COL14A1	ordinary
SPTAN1	COPE	ordinary
DLAT	CS	ordinary
MFSD2A	CAMK2D	ordinary
SOS1	PIK3R1	ordinary
PIP5K1C	TREM2	ordinary
MCOLN2	TNNI1	ordinary
GNAI3	IQGAP1	ordinary
SPRED3	RASA3	ordinary
PSEN1	CDH1	ordinary
CDH1	SRC	ordinary
CD79B	BLNK	ordinary
RAE1	ALYREF	ordinary
MAOB	PRDX5	ordinary
PRDX5	TXN2	ordinary
CCT2	TTC8	ordinary
PSMD7	GTSE1	ordinary
HLA-DPA1	CD3E	ordinary
AK9	WDR19	ordinary
ATP6V0A1	DTYMK	ordinary
ORAI2	VDAC2	ordinary
NUP155	XPOT	ordinary
MAPK11	MEF2C	ordinary
RRAGA	SLC3A2	ordinary
CCAR2	SERPINH1	ordinary
GTF2H3	POLR2J	ordinary
NCOA2	ACOX1	ordinary
NUP205	HDAC4	ordinary
SYNJ2	MTMR6	ordinary
SLC22A15	SLC4A7	ordinary
CNDP2	NFS1	ordinary
CACNA2D1	TMOD2	ordinary
FXYD2	SLC5A3	ordinary
SUMO1	AURKB	ordinary
MSRB1	EPRS	ordinary
MAT2B	INMT	ordinary
VAMP3	ARPC2	ordinary
KLC2	ACTR1A	ordinary
PTEN	DOCK1	ordinary
FGFR3	FGFR2	ordinary
PIAS3	MITF	ordinary
STAT3	MCL1	ordinary
RBBP7	CDKN2A	ordinary
NEDD8	BIRC5	ordinary
RAB14	EXOC5	ordinary
HSP90AA1	GUCY1B3	ordinary
GUCY1A2	PDE1A	ordinary
PIP5K1A	PIK3CA	ordinary
PPFIA3	ACHE	ordinary
ANO7	SLC6A13	ordinary
P2RX1	ATP2A3	ordinary
STXBP1	DNAJC5	ordinary
SLC6A13	SLC26A9	ordinary
GAB1	PAG1	ordinary
PSMB5	LTBR	ordinary
GMPPB	GMDS	ordinary
SLC2A8	ARPC1B	ordinary
SLC17A1	SLC17A3	ordinary
TAGAP	RAC2	ordinary
MCRS1	RAD23A	ordinary
CUL4B	ERCC6	ordinary
GGT7	DLG3	ordinary
DLG1	ATP2C1	ordinary
RPS27	RPS9	ordinary
SLC24A1	TRPM7	ordinary
FTSJ3	NOL11	ordinary
IKBKG	NFKBIE	ordinary
CTPS2	TTLL4	ordinary
MAP2K2	AGTRAP	ordinary
VAMP7	CLINT1	ordinary
EHMT2	TBP	ordinary
RPS19BP1	SIRT1	ordinary
HSPH1	HSPA1B	ordinary
FIG4	MTM1	ordinary
MTMR4	PI4K2A	ordinary
TCIRG1	PICK1	ordinary
LAMTOR3	AIMP1	ordinary
ARL2	ATP6V1F	ordinary
MB21D1	TMEM173	ordinary
TPCN2	LMOD1	ordinary
STIM1	PPP3CA	ordinary
RUNX1	NR4A3	ordinary
PSMD4	OAZ3	ordinary
RHOA	PPP1R12B	ordinary
EPHB2	EFNB1	ordinary
PAK2	MYLK	ordinary
C9orf3	SLC7A6	ordinary
SGK1	SCNN1D	ordinary
RAB43	STX6	ordinary
MTA3	TAF1B	ordinary
SLC4A3	SLC12A4	ordinary
SLC12A4	SLC4A3	ordinary
ATR	MCM8	ordinary
ATP2B4	PPP3R1	ordinary
VAPA	MOV10	ordinary
TNRC6B	NLK	ordinary
PSME4	ANAPC1	ordinary
OSBPL5	PLA1A	ordinary
HLA-DQA1	LCK	ordinary
MTMR7	IMPA1	ordinary
PAPSS2	SULT1C4	ordinary
CYLD	RBCK1	ordinary
PSMC5	UBE2C	ordinary
SUPT4H1	POLR2G	ordinary
TRRAP	TCF4	ordinary
SLC25A26	MRM1	ordinary
PSMB2	ANAPC15	ordinary
IL1RAP	BCR	ordinary
ATP6AP1	SLC25A6	ordinary
ADPGK	PGM2L1	ordinary
TSC2	MLST8	ordinary
MTRR	FPGS	ordinary
MSRB3	QARS	ordinary
CCNH	TCF3	ordinary
EPN1	CLTB	ordinary
PTK2	WASL	ordinary
RAD50	POLK	ordinary
MTA1	TAF1C	ordinary
PACSIN2	TGOLN2	ordinary
RRAGD	NOS3	ordinary
SSU72	NABP2	ordinary
CYCS	CASP9	ordinary
SPRED1	RASAL2	ordinary
HLA-DQB1	LCP2	ordinary
AASS	GOT2	ordinary
SUMF1	ARSD	ordinary
NFIA	POLR3H	ordinary
PAPSS1	SLC35B2	ordinary
EFNB3	LIMK2	ordinary
SLC26A11	PAPSS2	ordinary
SEC11C	RPL26L1	ordinary
EP300	TNFRSF21	ordinary
GGT1	DPEP2	ordinary
PMPCB	AFG3L2	ordinary
EXOSC8	UTP6	ordinary
ACLY	NAA35	ordinary
OSBPL8	SACM1L	ordinary
DIAPH2	CKAP5	ordinary
ERAP2	B2M	ordinary
GLE1	NUP133	ordinary
NCOA6	GRHL1	ordinary
TXNRD1	SEPHS2	ordinary
LIN7A	CPLX1	ordinary
CSNK1G2	GSK3B	ordinary
SEH1L	SNRPD1	ordinary
FGFR1	WASF3	ordinary
ATP2A2	NOTCH3	ordinary
LCLAT1	ACSL3	ordinary
ARPC4	VAMP8	ordinary
MLXIPL	ACACB	ordinary
FASN	MORC2	ordinary
C1D	WDR43	ordinary
CHD4	KAT6A	ordinary
PORCN	WNT9A	ordinary
PIK3CD	NECAP2	ordinary
AGFG1	ACTR3	ordinary
PPFIA4	SLC1A3	ordinary
TTYH3	SLC12A2	ordinary
RPS23	RPS7	ordinary
AGBL5	TTLL1	ordinary
LIN7C	STX1A	ordinary
TLL2	LOXL2	ordinary
EXOSC3	NOL6	ordinary
ATP6V1B2	NME1	ordinary
DYNC1I2	NR3C1	ordinary
IL2RB	STAT5A	ordinary
NFIB	POLR3K	ordinary
MTA2	BRPF1	ordinary
EGLN1	HIF1A	ordinary
PSMC1	NPEPPS	ordinary
PTPN11	IFNAR2	ordinary
ARL2BP	ADCY9	ordinary
ATP6V1E2	UPP2	ordinary
WTAP	NCBP2	ordinary
SIRT1	CLOCK	ordinary
TSC22D3	SCNN1A	ordinary
CCT5	BBS4	ordinary
UGP2	PPP1R3C	ordinary
MCM6	PRIM1	ordinary
PDPN	DGKA	ordinary
TTL	TUBA1A	ordinary
PSMA4	OAZ2	ordinary
ACTR2	VAMP7	ordinary
PPP2R1A	PPP2R5C	ordinary
SLC25A22	GLUD1	ordinary
NUP54	FIP1L1	ordinary
TNFSF13B	BIRC3	ordinary
PRKAG1	LAMTOR3	ordinary
RB1CC1	PIK3C3	ordinary
PSMC3	TNKS2	ordinary
MYO5A	EXOC8	ordinary
ITSN1	ARPC4	ordinary
PPP2CB	SPRY2	ordinary
AKAP9	SLC24A1	ordinary
NUP210	SYMPK	ordinary
SEL1L	RPS27A	ordinary
MAPKAP1	SGK1	ordinary
KDM4A	HERC2	ordinary
APH1A	EPHB4	ordinary
FBXL18	FBXL7	ordinary
RAD51C	CDK4	ordinary
IL2RG	JAK3	ordinary
SLC20A1	SLC4A4	ordinary
IPPK	PPIP5K2	ordinary
SLC35B4	RFNG	ordinary
ACOT13	HDAC8	ordinary
ARID4B	H3F3A	ordinary
PDHB	ACAA2	ordinary
TFPT	GPS1	ordinary
NUP58	KPNA3	ordinary
NUP88	GEMIN4	ordinary
INPPL1	BIN1	ordinary
ASB7	CUL5	ordinary
LEF1	CCND1	ordinary
MED25	CEBPA	ordinary
GMPPA	DPM3	ordinary
FAM20A	MEN1	ordinary
DNM2	AP2A2	ordinary
RPA1	HSPH1	ordinary
DNAJB1	HSPA1A	ordinary
SLC35B2	CHST1	ordinary
WDR35	PDE8B	ordinary
DHPS	EIF5A2	ordinary
ADSS	ADSL	ordinary
PLCB4	ITPKB	ordinary
AADAT	EARS2	ordinary
RRP1	RRP7A	ordinary
B3GAT3	GPC3	ordinary
APP	ACTA2	ordinary
CREBBP	PPARA	ordinary
UBE2B	UBE2N	ordinary
VNN2	PANK3	ordinary
MAT2A	MECOM	ordinary
DAB2	CD4	ordinary
BIRC2	NOD1	ordinary
RIPK2	CARD11	ordinary
PRKCD	CARD9	ordinary
PPP1CB	CSNK1D	ordinary
FKBP1A	NFATC1	ordinary
SPTLC1	AASDHPPT	ordinary
MMAA	SUCLG2	ordinary
ALAS1	CPT2	ordinary
RRAGB	MARS	ordinary
ULK1	DENND3	ordinary
PARG	FEN1	ordinary
DCP1B	LSM1	ordinary
XYLB	PPP2R5D	ordinary
PRKCA	STXBP3	ordinary
INO80D	COPS6	ordinary
IRAK4	PELI2	ordinary
WDR77	GEMIN7	ordinary
PSMD12	HNRNPD	ordinary
PFAS	RIMKLB	ordinary
PLCD4	SYNJ1	ordinary
ACTL6A	COPS3	ordinary
MLST8	AKT1S1	ordinary
CHST15	CSPG4	ordinary
CHD3	EP300	ordinary
NAA30	ARFRP1	ordinary
HDAC8	NAA38	ordinary
EFNB2	LIMK1	ordinary
EXOSC10	WDR75	ordinary
SLC39A4	GPR39	ordinary
DNMT1	H2AFJ	ordinary
SLC3A2	GCLC	ordinary
RBX1	SPRED2	ordinary
GBF1	COPB2	ordinary
LAMTOR4	MAF1	ordinary
PSMD14	CUL2	ordinary
NUP133	IPO8	ordinary
TOMM7	BCS1L	ordinary
NLK	TCF7L2	ordinary
HOGA1	AGXT2	ordinary
DZIP1	SPOPL	ordinary
IL33	FGFR4	ordinary
MID1IP1	ELOVL1	ordinary
POLH	BRCA2	ordinary
CLCN7	ANO7	ordinary
SLC12A7	SLC6A12	ordinary
XRN2	WDR36	ordinary
HLA-DPB1	CD247	ordinary
SLC8B1	P2RX4	ordinary
SLC39A7	MT1F	ordinary
ATP6V0C	ARL2BP	ordinary
AK8	IFT122	ordinary
SLC38A9	RARS	ordinary
IFT122	PDE7B	ordinary
TPCN1	VCL	ordinary
ECT2	RHOF	ordinary
TNFRSF10A	TNFRSF10B	ordinary
TNFRSF10D	TNFRSF10C	ordinary
GZMH	IGFBP3	ordinary
MBD3	UBTF	ordinary
E2F5	CCNA2	ordinary
GRIK5	VDAC3	ordinary
USP8	LRIG1	ordinary
DDX58	CASP8	ordinary
SCN4B	AKAP1	ordinary
NUP98	GEMIN5	ordinary
RPS27A	RFC4	ordinary
SKIV2L2	UTP15	ordinary
MTMR3	PIGC	ordinary
TTC21B	AKAP5	ordinary
TMED2	SEC24D	ordinary
LNPEP	HLA-G	ordinary
HDAC4	RUNX3	ordinary
CCND3	E2F2	ordinary
TFDP2	CDT1	ordinary
AGO3	RUNX1	ordinary
GNPDA1	PFKL	ordinary
GPI	SLC37A1	ordinary
NF2	PAK1	ordinary
CLCN3	ANO6	ordinary
DVL1	PLCB3	ordinary
TIGAR	GFPT1	ordinary
MKKS	BBS2	ordinary
SKP2	CUL1	ordinary
EIF1AX	RPL6	ordinary
GATAD2A	BRD1	ordinary
EPHA7	EFNA3	ordinary
EFNA1	NGEF	ordinary
PSMB4	ANAPC7	ordinary
CDK11A	OFD1	ordinary
PI4K2B	REPS2	ordinary
MTMR2	PITPNB	ordinary
PITPNM2	PLA2R1	ordinary
MAP3K11	ARAF	ordinary
OPLAH	SLC25A22	ordinary
SEPT2	RPGRIP1L	ordinary
AK2	SLC25A5	ordinary
PRKCB	STX4	ordinary
ACAA2	ACSF2	ordinary
PCOLCE	COL1A2	ordinary
AGPAT1	HDAC6	ordinary
BAG2	HSPA12B	ordinary
BCAT2	GPT2	ordinary
CCND1	TFDP1	ordinary
E2F4	MYBL2	ordinary
DNAJC2	HSPA14	ordinary
ALG10B	MAGT1	ordinary
CCT3	BBIP1	ordinary
HSCB	GLRX5	ordinary
LRP12	GPC6	ordinary
SCARB2	INPP4B	ordinary
UBE2V2	SUMO2	ordinary
DERL2	UBB	ordinary
HRASLS2	GDPD1	ordinary
ANK3	TMED7	ordinary
MMP2	SCUBE3	ordinary
NUP37	SNRPE	ordinary
XRCC1	XAB2	ordinary
DLD	SUCLA2	ordinary
PEX12	UBE2D3	ordinary
MNAT1	POLR2K	ordinary
GLUD1	OGDH	ordinary
DLG3	SLC8A1	ordinary
RAB7A	ACTR10	ordinary
ALG10	STT3A	ordinary
RMI2	FAAP100	ordinary
ATP6V0D1	ADPGK	ordinary
CLNS1A	SNRPD2	ordinary
LIG3	ZNF830	ordinary
NOD1	MAP2K3	ordinary
ACTR1A	FKBP4	ordinary
ADCY6	PDE2A	ordinary
INO80C	RBX1	ordinary
TAB1	MAP2K7	ordinary
MAP2K4	MAPK10	ordinary
MAPKAPK5	KALRN	ordinary
SLC25A12	CAD	ordinary
EFNB1	GIT1	ordinary
XYLT1	HSPG2	ordinary
VAMP4	ARPC5	ordinary
VDAC1	MCU	ordinary
LAMTOR2	RPS6KB1	ordinary
GUK1	TTC21B	ordinary
SUPT16H	ATM	ordinary
CHKA	PCYT1A	ordinary
ATP2B2	SNAP25	ordinary
SLC22A5	SLC9A7	ordinary
YWHAB	FAM114A2	ordinary
FZR1	MCM5	ordinary
AGMO	AQP7	ordinary
AGO4	NOTCH2	ordinary
PEMT	STARD10	ordinary
PTDSS1	PLA2G16	ordinary
RAB3GAP1	DCTN1	ordinary
P3H3	COL6A2	ordinary
PRMT5	GEMIN2	ordinary
CA2	ATP6V0B	ordinary
PPARGC1A	ESRRA	ordinary
RBM28	BMS1	ordinary
NCK2	MAPK11	ordinary
MAPK14	CBX8	ordinary
IL7	IL7R	ordinary
MTMR6	PIP4K2A	ordinary
BIRC3	RIPK2	ordinary
NUP153	HNRNPC	ordinary
GLS	ALDH18A1	ordinary
EXOSC2	UTP14A	ordinary
POFUT2	ADAMTS1	ordinary
ADAMTS2	COL3A1	ordinary
NEK6	NUP62	ordinary
GEN1	BLM	ordinary
HEY1	HEYL	ordinary
ACTR5	DDB2	ordinary
PIAS1	SATB1	ordinary
POFUT1	NOTCH1	ordinary
FZD5	DVL2	ordinary
PSENEN	NGFR	ordinary
APH1B	DTX4	ordinary
STRADA	PRKAB1	ordinary
MED1	RGL1	ordinary
B3GNT5	MUC1	ordinary
SBF1	PIGP	ordinary
PAN3	EIF4A1	ordinary
FAM13B	CDC42	ordinary
ATAT1	SLC33A1	ordinary
ATG101	DYNLL1	ordinary
CDKN2D	CCND3	ordinary
ACTR8	DDB1	ordinary
IKBKB	CYLD	ordinary
NCSTN	DTX2	ordinary
RPS11	DDX49	ordinary
LIN7B	PPFIA3	ordinary
ACSS2	ACAT2	ordinary
SMPD4	VAPB	ordinary
NLRC5	IFIH1	ordinary
USP34	TNKS	ordinary
ADAMTS3	COL1A1	ordinary
ACAT1	PCCA	ordinary
NFIC	POLR3C	ordinary
LTA4H	CYP4A11	ordinary
IDH3G	AASS	ordinary
DLST	ALAS1	ordinary
PLA2G4C	LPCAT4	ordinary
RNF181	BCL10	ordinary
CTSL	HLA-B	ordinary
FEN1	POLD3	ordinary
MTR	LARS	ordinary
SENP5	SUMO3	ordinary
CIT	MYL9	ordinary
IDH3A	TMLHE	ordinary
ERAP1	TAPBP	ordinary
USP30	PTRH2	ordinary
B3GALT6	SDC4	ordinary
FRAT2	CSNK1A1	ordinary
AGBL3	TPGS1	ordinary
AGK	MAPK3	ordinary
MAP2K1	PAPD7	ordinary
CLCN6	ARHGEF9	ordinary
RAP1A	SYK	ordinary
IDH3B	SLC25A11	ordinary
TMLHE	SDHD	ordinary
GMPR2	ADSS	ordinary
GLUL	CTPS1	ordinary
CD3EAP	HIST1H2BC	ordinary
MAML2	HEY1	ordinary
LAMTOR1	EIF4EBP1	ordinary
UBQLN2	AAK1	ordinary
IL27RA	TYK2	ordinary
NMT2	AACS	ordinary
GSR	CHAC2	ordinary
SBF2	PPP2R5E	ordinary
LPIN1	DGAT1	ordinary
TRAPPC8	RAB1A	ordinary
TOR1A	STON2	ordinary
BEST1	CA12	ordinary
IP6K1	PPIP5K1	ordinary
FADS2	ABCD1	ordinary
CATSPER2	TPM4	ordinary
MMP7	SPP1	ordinary
CBX8	CETN2	ordinary
CTNNB1	AXIN2	ordinary
BBS12	BBS7	ordinary
ESD	MGST3	ordinary
CIAO1	POLD1	ordinary
KSR1	RAF1	ordinary
INPP5D	FCHO1	ordinary
MFNG	NOTCH4	ordinary
TOMM5	CYC1	ordinary
POLR2I	NELFE	ordinary
CLOCK	BHLHE41	ordinary
NFYB	DDIT3	ordinary
TALDO1	GPI	ordinary
LTB	TRAF2	ordinary
RUNX3	LEF1	ordinary
DCTN4	PTGES3	ordinary
RORA	SREBF1	ordinary
SREBF1	SCD	ordinary
SLC25A6	SLC25A17	ordinary
AGL	SLC2A6	ordinary
TECR	CERS5	ordinary
CSNK1A1	APC	ordinary
SSB	POLR1D	ordinary
ABHD6	GK	ordinary
ATP6V0A2	ABCC4	ordinary
SHB	ITGAV	ordinary
ROCK1	PPP1R12A	ordinary
SEC16A	SEC22B	ordinary
SOD1	PRDX1	ordinary
SLC6A12	SLC12A7	ordinary
TRPM4	SLC9A8	ordinary
ALDH18A1	OAT	ordinary
LGMN	CUBN	ordinary
D2HGDH	ADHFE1	ordinary
OGDH	GCDH	ordinary
ARF3	TMED2	ordinary
IQGAP1	MAP2K1	ordinary
ACO2	IDH3A	ordinary
AGPAT4	CDS1	ordinary
RNF4	BRCC3	ordinary
HSPA8	AP3B1	ordinary
CYB5RL	CP	ordinary
BAZ1B	H2AFV	ordinary
STK11	PRKAA2	ordinary
PRKAA1	LAMTOR2	ordinary
HDAC1	MEAF6	ordinary
APBA1	STXBP1	ordinary
GPSM3	C3AR1	ordinary
GMPS	TTLL5	ordinary
DCUN1D5	UBE2F	ordinary
LDHA	SLC16A1	ordinary
GNPDA2	PFKP	ordinary
PFKM	ALDOB	ordinary
RICTOR	AKT3	ordinary
CHD9	GLIPR1	ordinary
PIGB	PIGF	ordinary
PIGO	PIGS	ordinary
E2F3	EED	ordinary
CYB5B	KARS	ordinary
HHAT	SHH	ordinary
DHFR	CALM1	ordinary
PIGF	PIGK	ordinary
PANK4	PPCS	ordinary
GLYAT	ACSM2A	ordinary
CDK4	E2F4	ordinary
FGF13	AHCYL2	ordinary
SLC6A8	CKMT1B	ordinary
LRP10	AGRN	ordinary
ORMDL1	ATAT1	ordinary
CFTR	SLC4A8	ordinary
TBC1D15	RAB7B	ordinary
CTSA	SLC17A5	ordinary
DNAJC7	HSPA4	ordinary
RNF168	BARD1	ordinary
WWTR1	SMAD7	ordinary
AOX1	PRDX6	ordinary
SMAD2	JUNB	ordinary
PRKAB2	RRAGB	ordinary
ESR1	CXCL12	ordinary
PIGW	ACSL4	ordinary
OCRL	MTMR1	ordinary
SCMH1	CBX4	ordinary
NDST2	GPC2	ordinary
RACGAP1	HLA-DQB1	ordinary
MAPK8	BMF	ordinary
RPA3	HSPB1	ordinary
ATG9A	ATG14	ordinary
MAP2K6	BOC	ordinary
ERLIN2	GAB1	ordinary
DNAJB6	HSPA2	ordinary
WDR19	PRKAR1A	ordinary
PRMT1	PRMT6	ordinary
HADHB	PLA2G6	ordinary
PNPLA2	AQP3	ordinary
SLC6A9	ANO5	ordinary
NDC1	SLBP	ordinary
MBOAT2	PEMT	ordinary
IL1R1	IRAK1	ordinary
IRAK1	PELI3	ordinary
FURIN	MMP11	ordinary
ATP6V1D	PNP	ordinary
GATAD2B	BRPF3	ordinary
COMMD4	CUL4A	ordinary
POLK	RAD50	ordinary
HDAC2	BRD7	ordinary
PLBD1	LPCAT3	ordinary
HMGCL	NAGS	ordinary
PPA1	PYGL	ordinary
EGLN3	HIF3A	ordinary
C2CD5	EXOC6	ordinary
CCNB1	CDCA5	ordinary
MBOAT1	PNPLA8	ordinary
CSNK2A1	NCAPD2	ordinary
NCOR1	NR1D1	ordinary
INO80B	COPS5	ordinary
OXCT1	SDHA	ordinary
ALDH2	ACSS3	ordinary
ACSS1	NAT8L	ordinary
AP2M1	GRIP1	ordinary
TADA2B	HIST2H2BE	ordinary
SARM1	TLR4	ordinary
REPS1	MYO10	ordinary
ATP6V0E2	AK8	ordinary
SLC44A4	CHKA	ordinary
HSBP1	MRPL18	ordinary
MBTPS1	ATF6	ordinary
CHPT1	PAFAH1B3	ordinary
SLC35A1	ST6GALNAC6	ordinary
B2M	FGFR3	ordinary
PPM1A	PRKAG1	ordinary
SMPD3	UGT8	ordinary
SGMS2	SMPD3	ordinary
MASTL	ARPP19	ordinary
PRDX6	GSR	ordinary
PGP	PLD2	ordinary
GAMT	CKMT1A	ordinary
ABCA6	LCAT	ordinary
CSNK1E	DVL3	ordinary
TPI1	GPD1L	ordinary
SPIDR	XRCC2	ordinary
ETNPPL	ALDH1B1	ordinary
PIGN	CEPT1	ordinary
RAB33B	MAN1A2	ordinary
FCGR2A	CD86	ordinary
MCM3	PRIM2	ordinary
RIN3	RAB31	ordinary
PLA2G4A	LPGAT1	ordinary
SEMA4D	RRAS	ordinary
AGTPBP1	TPGS2	ordinary
CACNA2D4	DMD	ordinary
MAGED1	MAPK8	ordinary
CNOT3	EIF4A2	ordinary
AK7	ADCY5	ordinary
PPP1CA	CSNK1E	ordinary
ERCC2	POLR2E	ordinary
PMPCA	TIMM50	ordinary
TIMM17A	FXN	ordinary
GDE1	CDIPT	ordinary
CATSPERG	ITGA1	ordinary
NFYA	SQLE	ordinary
RRAGC	SLC7A7	ordinary
PTPN3	STAM	ordinary
RNF43	FZD8	ordinary
CD3E	PRKCQ	ordinary
PIAS2	SUZ12	ordinary
CACNB4	UNC13B	ordinary
LPCAT3	PTDSS1	ordinary
NSMCE2	RAD21	ordinary
MAML3	HES1	ordinary
YY1	RAD23B	ordinary
ERCC3	POLR2B	ordinary
PIGU	PLAUR	ordinary
NOL12	DIEXF	ordinary
PDK3	PDHA1	ordinary
ARRB1	EPS15L1	ordinary
ASNA1	SEC61B	ordinary
PLD3	PITPNM2	ordinary
NEK7	NDC1	ordinary
SLC25A5	ATP6AP1	ordinary
PAFAH1B3	DYNC1H1	ordinary
PIK3CB	SNX18	ordinary
CPT1B	SLC25A20	ordinary
PPP5C	PIAS4	ordinary
TRPM7	CPNE3	ordinary
YES1	BTC	ordinary
RNF2	BMI1	ordinary
TULP3	PDE7A	ordinary
MYO9A	RAC1	ordinary
ERCC4	TOPBP1	ordinary
EGFR	PXN	ordinary
ADRA2A	GNG7	ordinary
SPR	PAH	ordinary
FANCG	FANCD2	ordinary
ACSL4	AGPAT3	ordinary
PPP2R5B	AXIN1	ordinary
BTRC	PRLR	ordinary
NFKB2	IL1B	ordinary
GPR161	PDE3A	ordinary
MPI	PMM1	ordinary
CASK	PPFIA1	ordinary
CDKN2C	CDK6	ordinary
LDHB	SLC16A3	ordinary
IPMK	IPPK	ordinary
B4GALT3	LUM	ordinary
NFYC	HSPA5	ordinary
PLCG1	DGKD	ordinary
RNF111	GTF2H3	ordinary
STEAP2	MCOLN1	ordinary
CCNT1	SMAD4	ordinary
FAM114A2	MAP2K2	ordinary
SPTBN1	ARCN1	ordinary
SLC4A4	NCOA1	ordinary
NCK1	MAPK14	ordinary
SLC38A1	SLC38A2	ordinary
ACOT2	GCAT	ordinary
JAK2	ZC3HAV1	ordinary
EXOSC4	TBL3	ordinary
AGPAT2	LPIN2	ordinary
VRK1	LEMD2	ordinary
LZTFL1	ARL6	ordinary
COMT	MTR	ordinary
NPEPPS	TAP1	ordinary
NPL	MPC1	ordinary
IL6R	PTPN11	ordinary
HIST1H4I	KDM4B	ordinary
TGOLN2	PLEKHA1	ordinary
CTPS1	SLC7A11	ordinary
MAOA	GPX1	ordinary
SLC50A1	SLC5A9	ordinary
SLC5A9	HK2	ordinary
MKNK1	PPP2CB	ordinary
ROCK2	PPP1CB	ordinary
PARP16	NNMT	ordinary
ACOT1	ACSL1	ordinary
DENND1C	RAB8B	ordinary
RBKS	PRPS1	ordinary
PRPS1	HPRT1	ordinary
DHCR7	DHCR24	ordinary
RARRES3	PNPLA7	ordinary
MDM4	DYRK2	ordinary
FBXW9	UBE2M	ordinary
PNPLA4	RETSAT	ordinary
CHCHD4	TIMM8A	ordinary
RPS24	FBL	ordinary
C2	C5	ordinary
SUMF2	ARSG	ordinary
SLC1A5	SLC38A1	ordinary
MSRB2	MAT2A	ordinary
TOMM22	ATP5G1	ordinary
ACTB	COPS7B	ordinary
NEFL	SORBS3	ordinary
IDH1	WTIP	ordinary
PPP1R12A	MYH10	ordinary
TRPC1	RASGRF2	ordinary
PIP4K2B	AP2B1	ordinary
CLCN2	SLC4A2	ordinary
CHM	RAB22A	ordinary
MVB12A	UBA52	ordinary
GANAB	CANX	ordinary
PHC1	HNRNPK	ordinary
RPS6KB1	EEF2K	ordinary
CNOT8	PAIP1	ordinary
MARC1	IARS	ordinary
PSPH	SERINC5	ordinary
ARFGAP1	COPZ2	ordinary
USP15	SMAD1	ordinary
RAB3GAP2	DCTN4	ordinary
PRKCH	GNAZ	ordinary
MTFMT	MTHFD1L	ordinary
SLC25A32	FTCD	ordinary
RIPK3	TICAM1	ordinary
SOCS3	LEPR	ordinary
LEPR	STAT5B	ordinary
SPRED2	SYNGAP1	ordinary
FGFR2	FGF2	ordinary
CHMP5	CHMP2B	ordinary
TRAPPC11	CHML	ordinary
TNFAIP3	SHARPIN	ordinary
RAF1	TRAK1	ordinary
ITGB3	KDR	ordinary
MTMR9	PIP4K2B	ordinary
SH3GL1	SH3KBP1	ordinary
BTC	ERBB3	ordinary
CBL	TGFBR2	ordinary
ABCD4	ABCC1	ordinary
ABCC1	GGT5	ordinary
HK1	G6PD	ordinary
SOS2	RHOBTB1	ordinary
C1S	C1R	ordinary
C4A	C4B	ordinary
RNF216	TRIM25	ordinary
IFIH1	CASP10	ordinary
DENND4A	RAB10	ordinary
ATG4A	GABARAPL1	ordinary
TP53BP1	MDC1	ordinary
CAMKMT	CALM2	ordinary
CCS	SOD1	ordinary
MAPK1	ELK1	ordinary
ABHD14B	SULT1A1	ordinary
ARFGAP2	YKT6	ordinary
EPHA1	EFNA1	ordinary
CHRNB2	ATP2C2	ordinary
IP6K2	IP6K1	ordinary
DDX6	LSM6	ordinary
ALG8	ALG10	ordinary
PLPP5	PRKCE	ordinary
AHCY	BHMT2	ordinary
ASL	CALM3	ordinary
TYK2	IL12RB2	ordinary
RPS16	IMP3	ordinary
MLX	AGPAT1	ordinary
IRF3	TBK1	ordinary
RPS28	UTP14C	ordinary
DPH3	MTAP	ordinary
ATXN7	HIST3H2A	ordinary
ESRRA	ATP5B	ordinary
ALS2CL	RAB5C	ordinary
EIF5	EIF3J	ordinary
LRAT	MYO7A	ordinary
SH3KBP1	PIK3AP1	ordinary
BAG1	HSPA12A	ordinary
TOR1B	STON1	ordinary
SYN1	RAB3A	ordinary
RPS27L	DCAF13	ordinary
TMED5	WNT2B	ordinary
VCP	HLA-A	ordinary
SHH	PTCH2	ordinary
EBNA1BP2	SENP3	ordinary
NARFL	ERCC2	ordinary
PGAM1	ENO1	ordinary
ABCB8	HMOX2	ordinary
HMOX1	BLVRA	ordinary
ATF6	HSP90B1	ordinary
NUDT5	TKT	ordinary
CUL3	SPRED1	ordinary
LPIN2	PNPLA2	ordinary
AHCYL1	TMOD3	ordinary
XIAP	TLE3	ordinary
PPP2R3B	RBL2	ordinary
DEGS1	PPM1L	ordinary
VPS4B	CHMP2A	ordinary
ALDH1A1	CRABP2	ordinary
PLCH2	DGKQ	ordinary
CYB5R4	SLC40A1	ordinary
ADAL	NT5C2	ordinary
GOLGA2	GORASP1	ordinary
GNA15	DAGLB	ordinary
ACSM2A	GLYAT	ordinary
SLC39A6	C1QBP	ordinary
CNOT11	EIF4A3	ordinary
ERF	ETS2	ordinary
LOXL1	MFAP2	ordinary
ABCB7	ABCG2	ordinary
HMOX2	BLVRB	ordinary
ABHD12	PLD1	ordinary
ERCC1	RFC2	ordinary
UBXN7	DCUN1D1	ordinary
ADAMTS4	ACAN	ordinary
ACACA	ELOVL7	ordinary
CERS2	DEGS1	ordinary
COQ5	COQ9	ordinary
OSBPL10	PLA2G12A	ordinary
PLCB3	PRKCZ	ordinary
PFKL	ALDOA	ordinary
MEF2D	PPARGC1A	ordinary
UBE2D2	TLR3	ordinary
RUVBL1	COPS7A	ordinary
HLCS	ACACA	ordinary
EXOSC1	WDR46	ordinary
SLC5A1	HK3	ordinary
B3GLCT	CFP	ordinary
FBXL5	IREB2	ordinary
VNN1	PANK1	ordinary
BOP1	PDCD11	ordinary
LIN37	CDC6	ordinary
SLX4	DNA2	ordinary
BIN1	SLC2A8	ordinary
ADCY7	PDE1B	ordinary
MAPK7	MEF2A	ordinary
RPS6KA3	CREB1	ordinary
THEM4	ACSM1	ordinary
HADHA	ACADS	ordinary
IL6ST	STAT3	ordinary
MYD88	CYFIP1	ordinary
PPP3CC	YWHAH	ordinary
RPS8	RRP9	ordinary
KDSR	CERS6	ordinary
CDC73	UBE2B	ordinary
BLM	FANCE	ordinary
CHMP3	MAP1LC3A	ordinary
PNPLA8	MBOAT1	ordinary
DNAJC6	SNX2	ordinary
SLC44A2	CHKB	ordinary
EFNA4	VAV3	ordinary
STAT4	LCP1	ordinary
ORC2	POLE2	ordinary
PKLR	ATP6V1C2	ordinary
BCHE	SLC44A2	ordinary
ATG4D	MAP1LC3B	ordinary
HAUS2	RAB8A	ordinary
AGPAT5	PRELID3A	ordinary
PRELID3A	CDS2	ordinary
EPHA4	EFNA4	ordinary
TGS1	DDX20	ordinary
PCNA	RMI2	ordinary
ENPP7	CERK	ordinary
SCNN1D	CAMK2B	ordinary
MAPK12	MEF2D	ordinary
GPD1L	GPAM	ordinary
ETHE1	SUOX	ordinary
EDC3	LSM5	ordinary
ABCC9	ATP1B1	ordinary
GLB1L	GBA	ordinary
SLC12A2	KCNN3	ordinary
OSBPL1A	DCTN5	ordinary
CENPE	HLA-DPB1	ordinary
FBXW11	MAP3K8	ordinary
LHPP	SLC25A10	ordinary
ABCB10	FLVCR1	ordinary
RHOQ	EXOC4	ordinary
CHSY1	VCAN	ordinary
PLXNA2	CDK5	ordinary
BLMH	TAP2	ordinary
OTUD7B	TAB3	ordinary
POLD4	RAD51	ordinary
SACM1L	PIGA	ordinary
IFT140	PRKACB	ordinary
HNF1A	HNF4G	ordinary
PIP4K2C	GNG12	ordinary
CASP6	LMNB1	ordinary
PGM2L1	PHGDH	ordinary
ALDH1B1	ACSS1	ordinary
IFNAR1	JAK1	ordinary
ACSL1	PPARD	ordinary
PMM1	GMPPA	ordinary
KIF15	HLA-DQA1	ordinary
DENND2C	RAB9B	ordinary
SRF	ITGB1	ordinary
CDC14B	MAPK6	ordinary
RGS2	GNA14	ordinary
SRC	QKI	ordinary
DNAL4	CLTA	ordinary
DPY30	ITGA2B	ordinary
AGPS	ACAA1	ordinary
MGLL	PLD3	ordinary
STRADB	PRKAG2	ordinary
ADAM10	JAG1	ordinary
USP11	NFKBIA	ordinary
GSK3B	ZNRD1	ordinary
ATF4	ATF3	ordinary
CCNT2	ATR	ordinary
METTL14	POLR2L	ordinary
GPT2	GLUD2	ordinary
DCP1A	LSM2	ordinary
CUX1	BRK1	ordinary
ADAM17	NRG1	ordinary
ARNTL	CRY1	ordinary
TDP1	XRCC5	ordinary
TRPV4	TPM1	ordinary
FES	PLXNA3	ordinary
ACTR1B	DCTN2	ordinary
TAP2	ERAP2	ordinary
PRKAG2	RHEB	ordinary
P2RX4	NEB	ordinary
ARHGAP9	RHOG	ordinary
N6AMT1	ETF1	ordinary
PPP1CC	CRY2	ordinary
PSMD3	CDC16	ordinary
C4B	C4A	ordinary
ADK	AK1	ordinary
HCK	FCGR2A	ordinary
TRIB3	AKT2	ordinary
ALDH1A3	FABP5	ordinary
SLC37A4	G6PC3	ordinary
PIK3R2	SNX9	ordinary
PI4KB	ARF1	ordinary
NSMCE3	SUMO1	ordinary
NOD2	MAP2K6	ordinary
SOD2	PRDX3	ordinary
MPHOSPH6	NOP58	ordinary
VTA1	CHMP4C	ordinary
MYLIP	VLDLR	ordinary
GAPVD1	RAB5B	ordinary
ARAF	ATG7	ordinary
TRIP10	LRP2	ordinary
ARF5	COPA	ordinary
ALS2	RAB5A	ordinary
CHMP4A	PPIA	ordinary
MAP3K1	MAP2K4	ordinary
DCP2	LSM7	ordinary
DGKQ	LPIN3	ordinary
KAT5	FANCA	ordinary
INPP5E	PLEKHA8	ordinary
ATP6V1F	NME2	ordinary
SMC4	NCAPD3	ordinary
CNOT7	EIF4E	ordinary
STAG1	STAG2	ordinary
VPS4A	CHMP3	ordinary
SLC19A1	MTRR	ordinary
SUCLG2	SLC27A3	ordinary
TEAD1	CTGF	ordinary
NRP1	DPYSL2	ordinary
RIC1	RAB6A	ordinary
VAV1	INPP5D	ordinary
MMS19	RTEL1	ordinary
DDIT4	YWHAG	ordinary
PTDSS2	OSBPL8	ordinary
CLIP3	TRADD	ordinary
LPCAT1	PLD6	ordinary
PCGF2	UBE2I	ordinary
MAPK6	NCOA3	ordinary
PSAT1	PSPH	ordinary
GABPB1	POLG2	ordinary
MAPKAPK3	CBX6	ordinary
SUCLA2	HADHB	ordinary
BBS10	BBS9	ordinary
IRAK3	TOLLIP	ordinary
SOCS1	TLR2	ordinary
ELL	GTF2H5	ordinary
CTSS	HLA-E	ordinary
CTSB	TLR7	ordinary
SCN1B	DLG4	ordinary
SHMT2	AMT	ordinary
USP4	TAB2	ordinary
AXL	ZMYM2	ordinary
AHCYL2	FGF13	ordinary
POLE3	RMI1	ordinary
BCKDK	DBT	ordinary
CHMP6	GABARAP	ordinary
GRIN2D	SLC24A3	ordinary
BLNK	DAPP1	ordinary
NRIP1	ARNTL	ordinary
NR1D1	NPAS2	ordinary
MRS2	PDHX	ordinary
EME2	BRIP1	ordinary
SFRP2	FZD1	ordinary
LRP6	FZD6	ordinary
SLC30A7	SOD3	ordinary
INO80	COPS2	ordinary
MAN2A2	MGAT2	ordinary
PKM	LDHA	ordinary
NT5C2	GUK1	ordinary
USP33	CCP110	ordinary
KAT2A	TAF1D	ordinary
GPT	MPC2	ordinary
FAAH	PTGS2	ordinary
MTMR12	PI4K2B	ordinary
MAP3K7	CHUK	ordinary
B4GALT7	SDC1	ordinary
BAG3	HSPA6	ordinary
FANCD2	RAD51D	ordinary
LIN54	RBL1	ordinary
PDGFA	PDGFRA	ordinary
PRDX1	TXN	ordinary
SIGIRR	TLR6	ordinary
SUCLG1	ACSF3	ordinary
SPTLC3	KDSR	ordinary
CDK7	TAL1	ordinary
RGS10	GNAI2	ordinary
GBA	ASAH1	ordinary
HPS4	RAB38	ordinary
KBTBD7	NF1	ordinary
TBL1X	PEX11A	ordinary
IFNGR1	JAK2	ordinary
UBE2L6	ISG15	ordinary
CSNK2B	NCAPH	ordinary
GPCPD1	ETNK2	ordinary
PRKG1	KCNMA1	ordinary
RANGAP1	CDCA8	ordinary
BTD	PDZD11	ordinary
AP2A2	ROR2	ordinary
MED11	LPL	ordinary
ATIC	IMPDH2	ordinary
MIB2	JAG2	ordinary
PTPN12	PDGFB	ordinary
SHMT1	ALDH9A1	ordinary
TLR6	IRAK4	ordinary
MUC20	GRB2	ordinary
GCNT4	MUC12	ordinary
CLCN5	TTYH3	ordinary
USP1	FAN1	ordinary
XRN1	LSM4	ordinary
LMNB1	HIRA	ordinary
SMARCD3	SLC27A1	ordinary
PLCB1	DGKE	ordinary
MEN1	MYC	ordinary
TMEM129	UBE2J2	ordinary
EXOSC5	DHX37	ordinary
RBBP5	GP1BA	ordinary
ANK1	COPG1	ordinary
PPIB	COL12A1	ordinary
PTPRK	CBL	ordinary
SLC25A28	FECH	ordinary
REEP3	GNB1	ordinary
MCM2	POLE3	ordinary
EPS15	DAB2	ordinary
KLRD1	BTK	ordinary
DENND4C	CHM	ordinary
PRODH	PYCR1	ordinary
PLD4	LIPH	ordinary
GFER	CHCHD5	ordinary
CHUK	REL	ordinary
STAT2	STAT1	ordinary
IL12RB1	STAT4	ordinary
CAST	CDK5R1	ordinary
CDK5R1	CDC25B	ordinary
TMPRSS6	LAMC1	ordinary
DVL2	HGS	ordinary
TBL1XR1	TIAM2	ordinary
INSR	PPP2R5A	ordinary
C1R	C1S	ordinary
KIF2C	HLA-DQB2	ordinary
RUVBL2	DKC1	ordinary
PIK3AP1	FGFR1	ordinary
CDKN1A	MCM2	ordinary
AAAS	SMN1	ordinary
MYO7A	RDH5	ordinary
FCHO1	PLEKHA2	ordinary
PRKCSH	CALR	ordinary
F8	F10	ordinary
PDCD6IP	ANTXR1	ordinary
CDC34	NFKB1	ordinary
ENO1	NANS	ordinary
GUSB	GLB1	ordinary
NIP7	UTP4	ordinary
CFLAR	TNFSF10	ordinary
ABCD1	PLA2G4C	ordinary
POLE	XRCC3	ordinary
TPP2	THOP1	ordinary
TRPM3	MYL3	ordinary
PI4KA	PIK3C2A	ordinary
COPS6	FBXO32	ordinary
CSF2RA	CSF2RB	ordinary
STX1A	TRPC4AP	ordinary
GAA	GYG2	ordinary
RAB3A	SLC1A1	ordinary
AMOTL2	YAP1	ordinary
SMURF1	PTCH1	ordinary
PSME2	EGLN1	ordinary
DGKA	LPIN1	ordinary
SGIP1	SYT11	ordinary
LPIN3	DGAT2	ordinary
CCZ1B	RAB7A	ordinary
VAV3	OCRL	ordinary
DYRK1A	LIN54	ordinary
PSMA1	LTB	ordinary
KIF22	HLA-DPA1	ordinary
COPS7B	CCNF	ordinary
ALOX5AP	LTA4H	ordinary
PDE1A	AK2	ordinary
PPP3CB	NFATC3	ordinary
HDAC6	MID1IP1	ordinary
GTF2H4	GTF2F2	ordinary
SLC25A4	ATP6V1E1	ordinary
XPO1	MAPK4	ordinary
RCHY1	RFC1	ordinary
DDX21	TEX10	ordinary
DDX41	IRF3	ordinary
TRAF1	TNFRSF1A	ordinary
BRIP1	FANCG	ordinary
PROS1	F8	ordinary
XRCC5	PRKDC	ordinary
ATP6V1H	SLC25A4	ordinary
SP1	FASN	ordinary
MIB1	DLL1	ordinary
KDM5B	CDKN1A	ordinary
NUP107	PHAX	ordinary
ARHGAP11A	RHOA	ordinary
P2RX7	CALD1	ordinary
PLXNA1	DPYSL3	ordinary
SLC7A11	GCLM	ordinary
EVC	SUFU	ordinary
BPNT1	NSF	ordinary
PYGB	UGP2	ordinary
ANO9	SLC26A6	ordinary
FAR1	AGPS	ordinary
SCP2	ACOT8	ordinary
UBA3	SKP1	ordinary
APRT	LHPP	ordinary
RPE	PPP2CA	ordinary
ATP1B3	SCN4B	ordinary
SLC26A1	PAPSS1	ordinary
ECE1	EDN1	ordinary
RPS15A	NOC4L	ordinary
IL10RB	IL10RA	ordinary
RNF185	CFTR	ordinary
PSMB3	LIMD1	ordinary
ABCA1	CPNE1	ordinary
ST6GALNAC6	SLC35A1	ordinary
WNT5A	FZD2	ordinary
DNA2	GTF2H4	ordinary
GRB2	CSK	ordinary
RFC5	TOP3A	ordinary
ACOX1	EHHADH	ordinary
CRTAP	COL8A1	ordinary
GLB1	PSAP	ordinary
PITPNM3	PLA2G2D	ordinary
INPP5A	INPP1	ordinary
VAC14	MTMR12	ordinary
KCNMA1	FXYD6	ordinary
CYP4F3	CYP4F11	ordinary
NRF1	TFB2M	ordinary
METAP2	DARS	ordinary
CHPF	BCAN	ordinary
MPC1	PC	ordinary
PFKP	ALDOC	ordinary
PAXIP1	DCLRE1C	ordinary
GALE	NUDT14	ordinary
FAM96B	NUBP2	ordinary
RPTOR	ULK1	ordinary
A2M	RHOB	ordinary
ARHGAP11B	RHOU	ordinary
LPCAT4	LPCAT1	ordinary
BEST4	CA14	ordinary
DNMT3B	HIST1H2BD	ordinary
ZAP70	GRAP2	ordinary
PDZD11	HLCS	ordinary
DPH7	EEF2	ordinary
MCCC1	AUH	ordinary
CAD	DHODH	ordinary
BOC	SMO	ordinary
PMM2	GMPPB	ordinary
CD86	VAV1	ordinary
TLR2	TIRAP	ordinary
ACVR2B	SMAD2	ordinary
CTTN	VAMP2	ordinary
POLR2J	EPAS1	ordinary
PIK3R5	ARRB2	ordinary
RALGAPB	RALA	ordinary
MAGT1	MMGT1	ordinary
FZD7	PARD6A	ordinary
TRPA1	CPNE7	ordinary
HIP1	IGF2R	ordinary
APAF1	CASP7	ordinary
HGF	BAG4	ordinary
DTYMK	IFT140	ordinary
PTPN1	STAT2	ordinary
ADIPOR1	MLXIPL	ordinary
CAB39	PRKAB2	ordinary
DPEP2	CAMK2G	ordinary
VAMP2	CACFD1	ordinary
TIRAP	IRAK2	ordinary
MYBBP1A	HIST1H2AE	ordinary
ALDOA	GNPAT	ordinary
HK3	SLC37A4	ordinary
ALDH3A2	ACSL5	ordinary
GGCT	CARS	ordinary
SULT2B1	BPNT1	ordinary
PIKFYVE	MTMR4	ordinary
SRM	DHPS	ordinary
VCL	MAPK1	ordinary
BTK	WAS	ordinary
CALM1	ORAI2	ordinary
TRPM8	MYH3	ordinary
NDE1	AJUBA	ordinary
SOAT1	ACLY	ordinary
CCNE1	RB1	ordinary
SCLY	GPT	ordinary
PSMC3IP	RPA1	ordinary
DUSP7	MAPK7	ordinary
VRK2	TMPO	ordinary
USP2	TAB1	ordinary
LYN	CD22	ordinary
GABPA	MTERF1	ordinary
BRCA1	AQR	ordinary
EBI3	IL27RA	ordinary
ADA	GLUL	ordinary
ACHE	SLC44A3	ordinary
PLCB2	RASGRP2	ordinary
DENND6A	RAB14	ordinary
NADSYN1	NICN1	ordinary
AGBL2	LRRC49	ordinary
TAF10	HIST1H2BN	ordinary
PAH	TTL	ordinary
TBC1D10B	RAB35	ordinary
DIO2	SLC5A8	ordinary
SLC35A3	MGAT4B	ordinary
SAMM50	VDAC1	ordinary
CASP7	VIM	ordinary
IGF1R	IRS1	ordinary
ARPC1A	LDLRAP1	ordinary
AGBL4	SLC25A18	ordinary
TAF1D	H2AFX	ordinary
TDP2	XRCC6	ordinary
DHRS9	ALDH1A3	ordinary
TFG	SEC13	ordinary
ACSL3	SPTLC1	ordinary
PRPS2	QPRT	ordinary
BCO1	DHRS4	ordinary
CAMK2G	EPB41L1	ordinary
ACAA1	CRAT	ordinary
ARRB2	PTPN13	ordinary
PPP6R1	SEC24C	ordinary
PIDD1	CASP2	ordinary
POLD2	RAD51AP1	ordinary
EDC4	PATL1	ordinary
LMBRD1	MMACHC	ordinary
PEBP1	ITGB3	ordinary
KL	TXK	ordinary
LDLRAP1	LDLR	ordinary
FXYD6	KCNQ1	ordinary
NUDT3	NUDT4	ordinary
TKT	PFKM	ordinary
KIF4A	HLA-DQA2	ordinary
IFNGR2	IFNGR1	ordinary
MTOR	AKT1	ordinary
DCTN2	NR3C2	ordinary
RAC1	MYL12B	ordinary
ACOT4	SLC27A2	ordinary
CUL5	CDC37	ordinary
ST13	HSPA9	ordinary
CITED2	CREBBP	ordinary
CAPN1	FLG	ordinary
NCEH1	ABCA1	ordinary
ABCG1	PLTP	ordinary
STAT6	SOCS1	ordinary
ALDH4A1	BCAT2	ordinary
GALNT7	MUC13	ordinary
WIPI2	GABARAPL2	ordinary
COPS4	SOCS2	ordinary
SLC1A3	SLC25A12	ordinary
MCFD2	SEC24A	ordinary
RHNO1	CHEK1	ordinary
PLK2	CENPJ	ordinary
IL1RL1	KL	ordinary
SMC2	NCAPG2	ordinary
CA12	BST1	ordinary
INMT	AHCY	ordinary
AMACR	ACOX2	ordinary
TNFRSF10C	TNFRSF10D	ordinary
ITPR2	STIM1	ordinary
HSD17B4	SCP2	ordinary
PPARA	CPT1A	ordinary
NF1	RASA1	ordinary
FCGR1A	CUX1	ordinary
MTHFS	MTHFD1	ordinary
SLC25A20	CPT1B	ordinary
GIT1	MYL12A	ordinary
MCCC2	CA5B	ordinary
MCM5	POLA2	ordinary
NPAS2	KLF15	ordinary
CCNB2	KIF2C	ordinary
[truncated: 429 more rows]

## Sheet: LIHC
gene1	gene2	type
ASS1	ASL	critical
SQLE	LSS	critical
DERL1	HLA-A	critical
TSTA3	SLC35C1	critical
ITGA4	ITGAL	critical
GART	PFAS	critical
RPS6KA5	ATF1	critical
ITGAL	ITGA4	critical
FOXM1	CENPF	critical
HNF1B	ONECUT1	critical
COL18A1	MMP9	critical
FUOM	FUK	critical
ABAT	ALDH5A1	critical
DPYD	DPYS	critical
CLIP3	TNFRSF1A	critical
CFD	CFB	critical
FAR2	AGPS	critical
CDO1	CSAD	critical
ACO1	IDH1	critical
NUDT3	NUDT4	critical
NUDT4	NUDT3	critical
HIF1A	RORA	critical
PIGV	PIGB	critical
SC5D	DHCR7	critical
DZIP1	CUL3	critical
RPS6KB1	EEF2K	critical
UGDH	SLC35D1	critical
TJP1	GJA1	critical
PCBD1	QDPR	critical
OTUB1	RNF128	critical
VCP	UBE2J2	critical
CBS	CTH	critical
CYP51A1	MSMO1	critical
WDR61	UBE2B	critical
SIRT3	IDH2	critical
CUL1	BTRC	critical
PRMT3	RPS2	critical
HMGCR	MVK	critical
DMGDH	SARDH	critical
GAB1	PXN	critical
USP47	POLB	critical
CHEK1	WEE1	critical
KMO	KYNU	critical
CD79B	BLNK	critical
SLC52A2	RFK	critical
ZNF385A	SFN	critical
ALAD	HMBS	critical
GALT	GALE	critical
HMGCS1	HMGCR	critical
HMGCS2	HMGCL	critical
SRM	DHPS	critical
SORD	XYLB	critical
CS	ACO2	critical
FOXO3	SOD2	critical
ALDH1A1	GLYCTK	critical
RAB3IL1	RAB3A	critical
XIAP	TLE4	critical
CEBPD	KLF5	critical
EBP	SC5D	critical
LNPEP	HLA-F	critical
PECR	PHYH	critical
SH2B1	GHR	critical
NAE1	UBA3	critical
PTS	SPR	critical
TPP2	THOP1	critical
TDO2	AFMID	critical
SLC2A5	KHK	critical
PHYH	HACL1	critical
AZIN2	AGMAT	critical
CRYM	PIPOX	critical
DENND1C	RAB13	critical
UROC1	AMDHD1	critical
CPOX	PPOX	critical
PMVK	MVD	critical
BAP1	HCFC1	critical
PPCS	PPCDC	critical
ATF2	MSH2	critical
MOCS2	GPHN	critical
MOCS1	MOCS2	critical
F12	F11	critical
JAK1	IFNGR1	critical
NR1H4	CYP7A1	critical
HPD	HGD	critical
ANKRD27	RAB21	critical
EEF1A2	EEF1A1	critical
MCAT	NDUFAB1	critical
SLC27A2	AMACR	critical
CTSK	MMP7	critical
HAL	UROC1	critical
CTSD	COL18A1	critical
DPAGT1	ALG13	critical
BTRC	PRLR	critical
NMT1	BID	critical
KITLG	KIT	critical
ECHS1	HADH	critical
RFK	FLAD1	critical
F10	F7	critical
AKR1A1	CRYL1	critical
ADHFE1	D2HGDH	critical
PTK6	ARAP1	critical
CRK	KIDINS220	critical
PRKCZ	SPHK1	critical
METTL21A	HSPA8	critical
OTC	SLC25A15	critical
SAE1	UBA2	critical
LSS	CYP51A1	critical
RAB3IP	RAB8B	critical
PDXK	PNPO	critical
TRIM21	DDX41	critical
SH2D2A	AXL	critical
SYK	CBLB	critical
USP28	CLSPN	critical
SEPHS2	SEPSECS	critical
LIPT1	DHTKD1	critical
AGXT	DAO	critical
GSTZ1	FAH	critical
CD22	CD79B	critical
COQ9	COQ3	critical
TIMP2	MMP2	critical
CPT2	ACADVL	critical
LYN	FCER1G	critical
AFMID	KMO	critical
BTD	PDZD11	critical
PGM2	DERA	critical
PGM3	UAP1	critical
HENMT1	TDRKH	critical
ELOVL5	ELOVL2	critical
NR6A1	TDGF1	critical
TECR	CERS5	critical
IDUA	SGSH	critical
TBC1D16	RAB4A	critical
USP19	RNF123	critical
ENTPD8	ENTPD1	critical
AHR	CYP1A1	critical
APOB	PECAM1	critical
YAP1	ITCH	critical
MTHFD1L	MTFMT	critical
TBC1D25	RAB33B	critical
ALG11	RFT1	critical
CAT	NUDT12	critical
ALOX5AP	LTA4H	critical
CDC25B	CDK2	critical
COX10	COX15	critical
ENOPH1	ADI1	critical
NSDHL	HSD17B7	critical
PGS1	PTPMT1	critical
AGXT2	HIBADH	critical
GBE1	GYS2	critical
HGD	GSTZ1	critical
ATP7A	ATOX1	critical
PKN1	PPP1R14A	critical
HYKK	PHYKPL	critical
MTHFD2	MTHFD2L	critical
ADSL	ATIC	critical
RALGDS	RALB	critical
TSPO	FDX1	critical
AURKA	PHLDA1	critical
CERK	CPTP	critical
TNIP2	MAP3K8	critical
USP33	CCP110	critical
GPHN	MOCOS	critical
RWDD3	SAE1	critical
TGFB1	CBFB	critical
PLD6	PRELID1	critical
KHK	GCKR	critical
DCPS	NT5C3B	critical
GPX2	GSR	critical
RENBP	NAGK	critical
SLC22A3	ADH1A	critical
MAN2B2	MANBA	critical
MAN2B1	MAN2B2	critical
GLRX3	ALAD	critical
PGAM5	FUNDC1	critical
MYC	MAPKAPK5	critical
ENTPD1	ENTPD8	critical
NAT8	BACE1	critical
AMT	SHMT2	critical
GNPNAT1	PGM3	critical
SRD5A3	DOLK	critical
MTHFD2L	MTHFD2	critical
RNF152	RRAGA	critical
CTSB	COL15A1	critical
RNF144A	UBE2L3	critical
OMA1	OPA1	critical
GCLM	GGCT	critical
GCLC	GSS	critical
DENND3	RAB12	critical
GPAT2	AGPAT5	critical
SGPL1	ALDH3A2	critical
PUM2	DCUN1D3	critical
AMD1	SMS	critical
HAAO	ACMSD	critical
ZDHHC2	CKAP4	critical
CBL	TGFBR2	critical
SLC22A1	MAOA	critical
SMS	SAT1	critical
ALDH9A1	BBOX1	critical
BPHL	VARS	critical
F5	F2	critical
RFT1	ALG3	critical
NGFR	SMPD2	critical
ECI1	MECR	critical
ELOVL1	FADS1	critical
HGS	STAM2	critical
USP10	SNX3	critical
TMEM55B	ING2	critical
HPSE	IDUA	critical
CYB5R3	CYB5A	critical
ALG2	ALG11	critical
FUK	FPGT	critical
USP7	FOXO4	critical
MANEA	B4GALT1	critical
ONECUT1	HNF1B	critical
BACE1	APP	critical
SLC31A1	ATP7B	critical
HVCN1	DUOX1	critical
CEBPB	EBF1	critical
ACADM	DECR1	critical
GMDS	TSTA3	critical
DDC	COMT	critical
TOMM40	PINK1	critical
APIP	ENOPH1	critical
COQ2	COQ6	critical
MDM2	DYRK2	critical
MDM4	JMY	critical
DHODH	UMPS	critical
KIT	SH2B2	critical
SUMF1	ARSD	critical
DPYS	UPB1	critical
EIF2AK3	EIF2S1	critical
ARV1	PLTP	critical
ZBED1	CHD3	critical
UGT1A1	UGT1A4	critical
ESRRA	ATP5B	critical
ALDOB	TKFC	critical
SLC30A6	SOD3	critical
HMBS	UROS	critical
PHGDH	PSAT1	critical
PPCDC	COASY	critical
PGLS	PGD	critical
ENPP1	ACP5	critical
RIMKLB	FOLH1	critical
ARG1	ODC1	critical
G6PD	PGLS	critical
NPM1	NOP2	critical
APOF	CETP	critical
ALG1	ALG2	critical
ALG6	ALG8	critical
MSMO1	NSDHL	critical
UGT1A4	UGT1A1	critical
PIGN	CEPT1	ordinary
DGAT1	PNPLA4	ordinary
PSMA3	CDC26	ordinary
FGFR2	WASF2	ordinary
FGFR1	WASF1	ordinary
PSMD6	UBE2E1	ordinary
RELB	NFKB2	ordinary
PACSIN2	TGOLN2	ordinary
FZD4	ARPC3	ordinary
PSMB10	CD40	ordinary
SLC5A9	HK2	ordinary
COPS7A	SPSB2	ordinary
CUX1	GAB2	ordinary
INPP5K	EPN2	ordinary
GNG5	CACNA1C	ordinary
PLCG2	INPP5B	ordinary
SEC11C	SSR2	ordinary
ARRB2	CD4	ordinary
SCARB2	INPP4B	ordinary
PSMC3	TNKS2	ordinary
RPS27L	DCAF13	ordinary
OTUD7B	TAB2	ordinary
COPS3	LRR1	ordinary
PPARA	CPT1A	ordinary
PSMC1	MAD2L1	ordinary
PPP2R5A	PDPK1	ordinary
BMP1	LOXL2	ordinary
SEH1L	SNRPD1	ordinary
POLE	XRCC3	ordinary
RAD50	POLK	ordinary
FGFR3	FGFR2	ordinary
EPHA3	EFNA1	ordinary
RAC1	MYL12B	ordinary
SH3GL1	SH3KBP1	ordinary
VAMP8	SH3D19	ordinary
UBQLN2	AAK1	ordinary
TRIM24	TEC	ordinary
LCK	TYROBP	ordinary
CTPS2	TTLL4	ordinary
SLC12A2	KCNAB1	ordinary
NUP214	SNRPB	ordinary
PSMC5	CKS1B	ordinary
VHL	HIF1A	ordinary
GNG7	DGKZ	ordinary
CALM3	IQGAP3	ordinary
PSMF1	BUB1B	ordinary
FKBP4	HSF1	ordinary
FCGR2A	CD86	ordinary
TEC	PRKCE	ordinary
GNG10	ITPKA	ordinary
ATP1B1	SLC9A1	ordinary
GUK1	TTC21B	ordinary
ADCY10	PDE4C	ordinary
SLC19A1	MTRR	ordinary
MTRR	FPGS	ordinary
SYT1	BCHE	ordinary
CALM2	GUCY1B3	ordinary
CATSPERG	ITGA1	ordinary
LTB	TRAF2	ordinary
IFT122	PDE7B	ordinary
BCR	BAIAP2	ordinary
STAT5B	BRWD1	ordinary
EIF1AX	RPL6	ordinary
ATP2B2	ANXA2	ordinary
SYNJ1	SBF2	ordinary
NECAP2	VAMP3	ordinary
COPS8	DTL	ordinary
SHH	SMURF2	ordinary
SMURF2	SMAD5	ordinary
PSMB7	ANAPC2	ordinary
DVL1	PLCB3	ordinary
AMER1	CTNNB1	ordinary
PPAT	GART	ordinary
SOS1	PIK3R1	ordinary
MAPKAPK3	CBX6	ordinary
SYVN1	IHH	ordinary
IHH	SMURF1	ordinary
NUP153	CPSF2	ordinary
C2	C5	ordinary
FGF2	FRS3	ordinary
NRAS	KIAA1549	ordinary
WRN	REV3L	ordinary
CTH	SERINC1	ordinary
TNFSF12	BIRC2	ordinary
BIRC3	RIPK2	ordinary
PSMD13	TNFRSF12A	ordinary
CACNA2D4	DMD	ordinary
ATP2A2	NOTCH3	ordinary
ATP2B4	PPP3CA	ordinary
LPCAT3	PTDSS1	ordinary
PTDSS1	PLA2G16	ordinary
MYO18A	CYFIP1	ordinary
RHOA	PKN3	ordinary
CACNA1D	CATSPER2	ordinary
NSMCE1	SMC3	ordinary
SUMO1	CDCA8	ordinary
SUCLG1	ACSF3	ordinary
PDHB	ACAA2	ordinary
PIP4K2C	GNAO1	ordinary
TIRAP	IRAK2	ordinary
SPRED1	RASAL2	ordinary
HDAC8	MID1IP1	ordinary
RAF1	TRAK1	ordinary
ATP1A1	ABCC9	ordinary
RPS28	UTP14C	ordinary
ADCY5	PDE4A	ordinary
ISYNA1	IMPA1	ordinary
SPCS2	SEC61G	ordinary
VAV3	INPP5A	ordinary
RAB8A	EXOC2	ordinary
CTPS1	GCLM	ordinary
RPS27A	RFC2	ordinary
NUP160	IPO8	ordinary
SKIV2L2	WDR36	ordinary
NUP188	ALYREF	ordinary
HSPA9	HSPD1	ordinary
PSME1	UBE2C	ordinary
EGFR	PAG1	ordinary
PSMA4	OAZ2	ordinary
TNFSF13B	BIRC3	ordinary
A2M	RHOB	ordinary
POM121	KPNB1	ordinary
MARC1	QARS	ordinary
LAT2	VAV1	ordinary
AKT3	FOXO3	ordinary
ITPR2	STIM1	ordinary
BAAT	ABCB11	ordinary
STUB1	CDC37	ordinary
HSP90AA1	CYGB	ordinary
CLCN4	ANO6	ordinary
DHCR7	DHCR24	ordinary
NCOA1	G0S2	ordinary
PSMD9	ANAPC5	ordinary
SYNJ2	MTMR6	ordinary
SLC25A12	CAD	ordinary
CA13	ATP6V1C1	ordinary
ATP6V0C	ARL2BP	ordinary
PSMB6	OAZ1	ordinary
VAV1	PRKCH	ordinary
NUP58	KPNA3	ordinary
ITPKC	INPPL1	ordinary
ITPK1	IPPK	ordinary
PSMD7	GTSE1	ordinary
ARPC4	VAMP8	ordinary
ATM	ERCC3	ordinary
ACSL6	RXRA	ordinary
VAPA	MOV10	ordinary
AGO4	NOTCH2	ordinary
ARRB1	EPS15L1	ordinary
RGS10	GNAI1	ordinary
GNAI1	PRKAR2A	ordinary
ATP6V1D	PNP	ordinary
GALNT7	MUC13	ordinary
MUC20	GRB2	ordinary
SLC4A7	NCOA2	ordinary
NCOA2	ACOX1	ordinary
HNF1A	HNF4G	ordinary
VAMP3	ARPC2	ordinary
CD247	BTK	ordinary
ACSL3	SPTLC1	ordinary
UBE2D1	TLR4	ordinary
PIK3CD	NECAP2	ordinary
EPN2	ITSN2	ordinary
NPEPPS	TAP1	ordinary
SPCS3	RPN2	ordinary
RPS19BP1	SIRT1	ordinary
DNAJB1	HSPA1A	ordinary
PRMT5	GEMIN2	ordinary
MNAT1	POLR2K	ordinary
NPL	MPC1	ordinary
MPC2	PDHB	ordinary
HSPA8	AP3B1	ordinary
GRAP2	RASGRP1	ordinary
ARL6IP5	TTLL12	ordinary
SLC25A22	GLUD1	ordinary
GNAI2	CD209	ordinary
NUDT14	PGM2	ordinary
ROCK1	PPP1R12A	ordinary
GNB5	KLB	ordinary
POFUT2	ADAMTS1	ordinary
ARAF	ATG7	ordinary
PSMA6	CUL2	ordinary
YY1	RAD23B	ordinary
RBX1	SPRED2	ordinary
BIN1	SLC2A8	ordinary
SYT11	PLEKHA2	ordinary
PSMB1	ANAPC11	ordinary
BLMH	TAP2	ordinary
PSMA1	HNRNPD	ordinary
AASDHPPT	FASN	ordinary
CHUK	REL	ordinary
STAM2	EPS15	ordinary
SLC12A6	ATP1B3	ordinary
FXYD2	SLC22A15	ordinary
ARHGAP30	RHOH	ordinary
DHCR24	SREBF2	ordinary
NCK2	MAPK11	ordinary
MAPK14	CBX8	ordinary
SEC16B	SEC23A	ordinary
SLC25A4	ATP6V1E1	ordinary
ATP6V0A1	DTYMK	ordinary
GMPR2	ADSS	ordinary
RHOQ	EXOC4	ordinary
HELZ2	FHL2	ordinary
INO80	COPS2	ordinary
PSMC2	CDC23	ordinary
UBA3	SKP1	ordinary
CACNB2	FCN1	ordinary
WDR35	PDE8B	ordinary
AHCYL1	TMOD3	ordinary
ATP1B2	SLC22A5	ordinary
TGOLN2	INPP4A	ordinary
TRPM4	SLC9A8	ordinary
STXBP1	DNAJC5	ordinary
SLC1A2	TTLL11	ordinary
ARF5	COPA	ordinary
GBF1	COPG1	ordinary
PSMD5	CDC27	ordinary
SPR	PAH	ordinary
LRP1	SDC3	ordinary
PSMB8	TNFSF13B	ordinary
ANAPC16	FZR1	ordinary
XRN2	TSR1	ordinary
SPCS1	RPL15	ordinary
POLR2J	EPAS1	ordinary
RAB43	STX6	ordinary
NCL	PDCD11	ordinary
RPS15A	RPS14	ordinary
NUP54	FIP1L1	ordinary
PIK3CA	PICALM	ordinary
EPN1	CLTB	ordinary
ALG10B	MAGT1	ordinary
GUSB	GLB1	ordinary
DLG4	PPP3CB	ordinary
PPFIA1	SLC1A3	ordinary
NCEH1	ABCA1	ordinary
STAT4	LCP1	ordinary
TBL1X	PEX11A	ordinary
ERBB2	GAB1	ordinary
ALG10	STT3A	ordinary
GPCPD1	ETNK1	ordinary
ETNK2	PCYT2	ordinary
WWTR1	SMAD7	ordinary
PRKACA	IL3RA	ordinary
FNBP1L	SCARB2	ordinary
CD3D	ZAP70	ordinary
ORAI1	MYL6	ordinary
ACTR1B	DCTN1	ordinary
PSMD3	RELB	ordinary
PPP2R1B	RBL2	ordinary
PRPS2	NAPRT	ordinary
APRT	LHPP	ordinary
SPTLC1	AASDHPPT	ordinary
ARHGEF9	AGT	ordinary
PSMB3	ANAPC7	ordinary
CACFD1	MYL5	ordinary
PPP3R1	YWHAQ	ordinary
IL7	IL7R	ordinary
TRPM7	SLC24A1	ordinary
GMPR	IMPDH1	ordinary
IMPDH1	GMPS	ordinary
ADCY1	RAPGEF4	ordinary
AKAP1	TPM2	ordinary
INPP4A	SYNJ2	ordinary
ADCY7	IQGAP1	ordinary
TFPT	GPS1	ordinary
SEC11A	RPS17	ordinary
PSMB9	TNFRSF1B	ordinary
KRAS	BRAP	ordinary
DIAPH2	SPC24	ordinary
MAP3K7	CHUK	ordinary
MAP2K6	BOC	ordinary
CLCN6	ARHGEF9	ordinary
ANO6	SLC6A6	ordinary
CACNA2D1	SORBS3	ordinary
SRI	ATP2B4	ordinary
CHRNA4	VDAC2	ordinary
JAK2	ZC3HAV1	ordinary
PSMD12	NPEPPS	ordinary
BTK	WAS	ordinary
LPCAT2	STARD7	ordinary
PAK2	MYLK	ordinary
NCALD	STX1A	ordinary
SLC2A13	CDIPT	ordinary
CDIPT	DPM2	ordinary
TOMM22	ATP5G1	ordinary
PSMA2	ANAPC16	ordinary
PSME4	ANAPC1	ordinary
MAPK1	ELK1	ordinary
RPS3A	FBL	ordinary
CDC42	KIF2C	ordinary
SLC17A1	SLC17A3	ordinary
CNTRL	SOS1	ordinary
COPS4	SOCS2	ordinary
IL6R	STAT3	ordinary
MBTPS2	CREB3L2	ordinary
ACTR2	VAMP7	ordinary
NUP35	HNRNPC	ordinary
P2RX7	TPM3	ordinary
ITK	RASGRP2	ordinary
CHD9	GLIPR1	ordinary
TRIB3	AKT1	ordinary
ITPR1	PPP3R1	ordinary
STIM1	ANXA6	ordinary
IDH1	WTIP	ordinary
GNAI3	PRKACB	ordinary
PPP3CB	NFATC3	ordinary
SACM1L	PIGA	ordinary
HSBP1	MRPL18	ordinary
ZMYM2	ABI2	ordinary
TPCN2	LMOD1	ordinary
SNAP25	SLC1A7	ordinary
RPS11	DDX49	ordinary
CTNNB1	AXIN2	ordinary
PTPN11	IFNAR2	ordinary
STAT2	STAT1	ordinary
PDPK1	RPS6KA3	ordinary
GSK3B	PLXNA1	ordinary
ADCY9	PDE8A	ordinary
SLC24A1	TRPM7	ordinary
TYROBP	LAT2	ordinary
VAV2	ITPR3	ordinary
SLC38A9	RARS	ordinary
CIT	MYL9	ordinary
VDAC2	MICU1	ordinary
WIPI2	GABARAPL2	ordinary
IRS2	FGF2	ordinary
INPP5D	FNBP1	ordinary
MTA1	TAF1C	ordinary
KCNE4	FXYD6	ordinary
PPP2CA	PFKFB1	ordinary
CDKN1B	MCM6	ordinary
TP53	PIDD1	ordinary
GNB2	CUX1	ordinary
TAT	HIF1AN	ordinary
RNF5	UBB	ordinary
UBA52	POLD2	ordinary
IGF2	IGF1R	ordinary
GFPT1	GNPNAT1	ordinary
ALG12	ALG9	ordinary
ALG9	ALG6	ordinary
SLC1A7	SLC25A18	ordinary
FNBP1	SYT1	ordinary
RPS24	RPS7	ordinary
GPT	LDHA	ordinary
CCND1	E2F2	ordinary
VAMP7	CLINT1	ordinary
ARFGAP2	YKT6	ordinary
KAT5	FANCA	ordinary
NOD1	MAP2K3	ordinary
TRPV2	TLN1	ordinary
PSMA5	ANAPC4	ordinary
NADSYN1	NICN1	ordinary
PSMD8	RNF146	ordinary
AHCYL2	NCOA1	ordinary
HSD3B7	PTGIS	ordinary
POM121C	KPNA1	ordinary
PRKACB	GFRA1	ordinary
RPS13	RRP9	ordinary
GNB1	DGKA	ordinary
ARHGAP24	RAC3	ordinary
CHM	RAB22A	ordinary
HIP1	IGF2R	ordinary
MET	MYO18A	ordinary
SEC24C	SEC23IP	ordinary
STAM	PIP5K1A	ordinary
MLST8	MAF1	ordinary
RPA1	HSPH1	ordinary
RBBP8	FANCC	ordinary
SLC39A6	KCNJ11	ordinary
POLE4	EXO1	ordinary
CERS2	DEGS1	ordinary
ACSL5	ZDHHC21	ordinary
PHC1	HNRNPK	ordinary
AKT2	GSK3A	ordinary
GNA15	DAGLB	ordinary
UNC13B	ARL6IP5	ordinary
HLA-E	CD28	ordinary
LCLAT1	ACSL3	ordinary
AKAP9	MYL6B	ordinary
CREBBP	TIAM2	ordinary
PPARG	CD36	ordinary
ARF4	COPB1	ordinary
TMED10	SEC24D	ordinary
HLA-DQB1	CD3D	ordinary
PTK2B	SHB	ordinary
VEGFA	ROCK1	ordinary
LHPP	SLC25A10	ordinary
PPARGC1A	ESRRA	ordinary
FRS2	CPSF6	ordinary
FGFR4	FRS2	ordinary
JAK3	IL2RB	ordinary
SLC11A2	FTL	ordinary
PSME2	EGLN1	ordinary
PSMA7	TPP2	ordinary
ENO1	PKM	ordinary
PKLR	ATP6V1C2	ordinary
NECAP1	M6PR	ordinary
RABGGTB	RAB3D	ordinary
HIST2H2BE	HIST1H3H	ordinary
CD28	INPP5D	ordinary
HAGH	BSG	ordinary
PDP2	DLAT	ordinary
DLAT	CS	ordinary
PSMC6	SKP2	ordinary
STON1	ARPC1A	ordinary
TEAD1	CTGF	ordinary
HLA-DPB1	CD247	ordinary
ITSN2	ACTR2	ordinary
ANK2	COPG2	ordinary
INO80B	COPS5	ordinary
AKT1S1	RPS6KB1	ordinary
EP300	TNFRSF21	ordinary
LEPR	JAK2	ordinary
TOP3A	FANCG	ordinary
PPP1CA	CSNK1E	ordinary
MCOLN1	TMOD1	ordinary
GUCY1A2	PDE1A	ordinary
COPS2	FEM1B	ordinary
B3GALT6	SDC1	ordinary
PLA2G2A	LPCAT1	ordinary
LPCAT4	PLBD1	ordinary
SLC20A2	SLC9A9	ordinary
PRKAB1	TSC2	ordinary
CDK11A	CEP72	ordinary
COASY	SLC25A16	ordinary
FCHO2	PLEKHA1	ordinary
AP2M1	FZD5	ordinary
ATP6V0A2	ABCC4	ordinary
SLC25A6	MB21D1	ordinary
EPHA4	EFNA4	ordinary
RABGGTA	RAB24	ordinary
RPA2	HSPA1L	ordinary
PRKCE	SHC1	ordinary
MAT2A	DPH2	ordinary
SLC6A13	ANO7	ordinary
VDAC3	MICU3	ordinary
PI4K2A	SH3GL1	ordinary
FAM20C	MFGE8	ordinary
PPP2R5E	YWHAB	ordinary
ITGB3	KDR	ordinary
DLD	GCSH	ordinary
GNAS	PDE2A	ordinary
AK2	SLC25A5	ordinary
ARL2BP	ATP6V0C	ordinary
PIK3R5	ARRB2	ordinary
RARRES3	PNPLA7	ordinary
ATP6V1B2	ADPGK	ordinary
UPP2	DPYD	ordinary
TNKS2	PTEN	ordinary
CD86	NCKAP1L	ordinary
EXOSC10	UTP14A	ordinary
PDE1B	GMPR	ordinary
RANGAP1	AURKB	ordinary
MBD3	ING5	ordinary
GPSM3	FPR3	ordinary
RIOK3	PNO1	ordinary
SLC35A1	ST6GALNAC6	ordinary
CHAC1	CNDP2	ordinary
UBB	RFC5	ordinary
PIP5K1A	PIK3CA	ordinary
DCP1B	LSM2	ordinary
SCN1B	DLG4	ordinary
ITPR3	CALD1	ordinary
FZR1	MCM3	ordinary
EXOSC7	IMP4	ordinary
EPHA1	EFNA2	ordinary
ATR	CDC7	ordinary
SOD2	PRDX5	ordinary
SLC6A6	SLC12A4	ordinary
SLC25A5	ATP6AP1	ordinary
PTPN1	STAT2	ordinary
ATP6V0E2	TSPAN7	ordinary
RPS23	DHX37	ordinary
B3GLCT	CFP	ordinary
MB21D1	TMEM173	ordinary
TMLHE	SDHD	ordinary
NFS1	MOCS3	ordinary
GTF2H2	POLR2D	ordinary
PSEN2	EPHB2	ordinary
EPHB3	EFNB2	ordinary
GPLD1	SPRN	ordinary
SRSF10	HNRNPR	ordinary
ACSS1	HMGCS2	ordinary
MTMR6	PIP4K2A	ordinary
IFT140	PDE1B	ordinary
EXOSC3	NOL6	ordinary
GNG12	CACNB2	ordinary
LAMTOR4	IARS	ordinary
PSMD1	BUB3	ordinary
SLC30A10	FN1	ordinary
TRIP10	SYT11	ordinary
TTF1	TAF1A	ordinary
NAGS	CPT2	ordinary
GCAT	GLDC	ordinary
BAG1	HSPA12A	ordinary
CRLS1	TAZ	ordinary
ATP2B1	ATP2A2	ordinary
SEPT2	RPGRIP1L	ordinary
SLC1A5	SLC38A1	ordinary
FAM20A	TMEM132A	ordinary
MTM1	PPP2R5A	ordinary
HDAC2	BRD7	ordinary
VCL	MAPK1	ordinary
CNDP2	NFS1	ordinary
DCTN4	PTGES3	ordinary
AK9	WDR19	ordinary
ATP6V0B	GUK1	ordinary
PFKFB1	PFKM	ordinary
KYNU	HAAO	ordinary
FKBP1B	ACTG2	ordinary
SSU72	NABP2	ordinary
RPS16	IMP3	ordinary
ATP6V0E1	NME1	ordinary
RPS27	RPS9	ordinary
PPRC1	TFAM	ordinary
APP	SORBS1	ordinary
ULK1	ATG13	ordinary
HLA-DRA	LCP2	ordinary
CARM1	TRIB3	ordinary
RXRA	PLIN2	ordinary
GLUD2	CPS1	ordinary
GPT2	GLUD2	ordinary
RGS2	GNA14	ordinary
GNAQ	DGKH	ordinary
PIK3C2A	PIKFYVE	ordinary
INPP4B	MTMR9	ordinary
MPHOSPH6	NOP58	ordinary
MSRB1	MAT1A	ordinary
SLC36A4	WARS	ordinary
PIP4K2A	SH2D2A	ordinary
SEC16A	COL7A1	ordinary
IDH3A	TMLHE	ordinary
NIP7	UTP4	ordinary
NFIB	POLR1C	ordinary
PCF11	INTS3	ordinary
ELL	GTF2H5	ordinary
GNG11	CACNB3	ordinary
PPP2R5C	MARK3	ordinary
RUNX3	LEF1	ordinary
INPP5A	INPP1	ordinary
INPP1	IMPA2	ordinary
GDPD5	CHKA	ordinary
CDKN1C	TFDP1	ordinary
TFDP1	RRM2	ordinary
ARHGEF15	RHOJ	ordinary
NBN	TCEA1	ordinary
EPHB6	TIAM1	ordinary
NLRX1	TRIM25	ordinary
IFIH1	CASP8	ordinary
RICTOR	AKT3	ordinary
FADS2	ABCD1	ordinary
GPIHBP1	APOC2	ordinary
GNA11	DAGLA	ordinary
PRKCH	GNAZ	ordinary
P4HA1	COL5A3	ordinary
CAPZA1	HSP90AB1	ordinary
SPRED2	SYNGAP1	ordinary
ARHGEF17	RHOBTB2	ordinary
CLIC2	ANXA1	ordinary
MSRB3	LARS	ordinary
USP2	TAB1	ordinary
ROCK2	PPP1CB	ordinary
CSNK1A1	APC	ordinary
ADCY3	RAPGEF3	ordinary
AMACR	ACOX2	ordinary
OPLAH	BCAT1	ordinary
CLTC	AP1G1	ordinary
CLNS1A	SNRPE	ordinary
ELOVL6	HSD17B12	ordinary
ORMDL1	ATAT1	ordinary
ACSS2	ACAT2	ordinary
LAMTOR3	AIMP1	ordinary
RRAGB	MARS	ordinary
B2M	FGFR3	ordinary
ARNTL	PPARA	ordinary
ERAP2	B2M	ordinary
CDKN1A	MCM2	ordinary
POFUT1	NOTCH1	ordinary
SLC25A11	LIMD1	ordinary
CSF2RA	CSF2RB	ordinary
ERLIN2	FGFR1	ordinary
NUP88	GEMIN4	ordinary
IRAK4	PELI2	ordinary
DEGS1	PPM1L	ordinary
LAMTOR5	EEF1E1	ordinary
NOS3	GUCY1A3	ordinary
ACO2	IDH3A	ordinary
IDH3B	SLC25A11	ordinary
DDIT4	YWHAG	ordinary
IRS1	FGFR1OP	ordinary
TLN1	PTK2	ordinary
RNF4	BRCC3	ordinary
BABAM1	NLRP3	ordinary
SLC8B1	P2RX4	ordinary
DLG3	SLC8A1	ordinary
GLB1	PSAP	ordinary
ASL	ARG1	ordinary
ADPGK	PGM2L1	ordinary
YWHAB	FAM114A2	ordinary
AGTPBP1	TPGS2	ordinary
ITPKB	OCRL	ordinary
BAG5	HSPA13	ordinary
SUPT4H1	POLR2G	ordinary
VRK2	TMPO	ordinary
OSBPL1A	DCTN6	ordinary
PSMB2	ANAPC15	ordinary
RRAGC	SLC7A7	ordinary
PDE4D	AMPD3	ordinary
MMP2	EPHB3	ordinary
MIB1	JAG2	ordinary
IKBKB	CYLD	ordinary
GABPB1	POLG2	ordinary
DAGLB	MGLL	ordinary
ISG15	KPNA2	ordinary
AHCY	MTR	ordinary
MYH3	EXOC7	ordinary
PDCD6IP	ANTXR2	ordinary
PPP2R5B	AXIN1	ordinary
MTMR1	PIP4K2C	ordinary
RPS8	NOC4L	ordinary
GNG2	RASGRP3	ordinary
LIN7A	CPLX1	ordinary
DLST	SUCLG1	ordinary
GPI	SLC37A1	ordinary
MYO9A	RHOA	ordinary
TADA2B	HIST2H2BE	ordinary
ACOT7	HDAC8	ordinary
PMM2	GMPPB	ordinary
GMPPA	DPM3	ordinary
NFIC	POLR3C	ordinary
P4HB	APOA4	ordinary
C9orf3	SLC7A6	ordinary
P2RX4	NEB	ordinary
HLA-DQA1	CD3E	ordinary
SLC13A5	ACO1	ordinary
SPIDR	XRCC2	ordinary
PIK3R6	SNX9	ordinary
CDK11B	CEP131	ordinary
PTPRK	CBL	ordinary
TRPC4AP	ITGB5	ordinary
MAT2B	INMT	ordinary
RPA3	HSPB1	ordinary
PMPCB	GRPEL2	ordinary
BAG3	HSPA6	ordinary
SLC5A6	HLCS	ordinary
HLCS	ACACA	ordinary
OAT	ABAT	ordinary
MTMR4	VAC14	ordinary
SMAD3	CDKN2B	ordinary
SP1	PMVK	ordinary
FASN	MORC2	ordinary
GTF2H3	POLR2J	ordinary
INSR	PPP2R1B	ordinary
SSB	POLR1D	ordinary
ATP1A2	KCNN3	ordinary
OSBPL8	SACM1L	ordinary
AASS	GOT2	ordinary
FPGS	SHMT1	ordinary
GRB2	CSK	ordinary
SLC6A1	TTYH3	ordinary
BEST1	CA12	ordinary
DLG1	ATP2C1	ordinary
DDX6	LSM1	ordinary
ARSB	IDS	ordinary
IDS	HEXB	ordinary
VAMP4	ARPC5	ordinary
GGT7	DLG3	ordinary
PDK2	PDHX	ordinary
DHFR	CALM1	ordinary
AK7	SLC25A17	ordinary
PNPLA3	GK	ordinary
BAG4	HSPA12B	ordinary
ORAI2	TMOD2	ordinary
DCP1A	LSM6	ordinary
LMAN2	SEC24B	ordinary
SOCS1	MYD88	ordinary
TLR1	SNAP23	ordinary
EPS15	DAB2	ordinary
ASPH	MYH11	ordinary
RMI1	FAAP24	ordinary
BRCA1	LIG3	ordinary
GNB4	CACNA1D	ordinary
FAS	RIPK1	ordinary
KDR	ROCK2	ordinary
PLCD1	PRKCD	ordinary
LAMTOR2	AKT1S1	ordinary
SLC3A2	GCLC	ordinary
ADAM10	JAG1	ordinary
SRF	ITGB1	ordinary
WNK2	SCNN1A	ordinary
TFDP2	CDT1	ordinary
PIK3C2G	TRIP10	ordinary
MBTPS1	CREB3L4	ordinary
SLC40A1	LCN2	ordinary
ARFGAP3	USO1	ordinary
TBC1D1	RAB10	ordinary
PIGW	ACSL4	ordinary
HDAC1	MEAF6	ordinary
NFIX	POLR3K	ordinary
PLD2	PLPP5	ordinary
PLPP5	TRPC1	ordinary
TAB3	MAP2K4	ordinary
IL12RB1	STAT4	ordinary
RAB11A	EXOC3	ordinary
MTMR14	PIGC	ordinary
PI4KA	PIK3C2A	ordinary
ANK3	TMED7	ordinary
STAT6	IL4R	ordinary
TRPM2	ATP2A3	ordinary
TNFAIP3	TRAF1	ordinary
SPTBN5	KDELR3	ordinary
MAP3K11	ARAF	ordinary
COQ5	COQ9	ordinary
CASP8	PLEC	ordinary
FXYD6	KCNE4	ordinary
GCGR	GNG2	ordinary
SOAT1	SLC27A5	ordinary
GGT1	DPEP2	ordinary
DNAJC7	HSPA4	ordinary
MED1	RGL1	ordinary
IKBKG	NFKBIE	ordinary
TRPC1	RASGRF2	ordinary
NR1D1	NPAS2	ordinary
GRIA3	ITGA11	ordinary
ACOT9	DBT	ordinary
GPD1L	GPAM	ordinary
PDK3	PDHA1	ordinary
PCOLCE2	COL5A2	ordinary
ABCB8	HMOX2	ordinary
MEN1	MYC	ordinary
SMAD7	KEAP1	ordinary
FAM114A2	MAP2K2	ordinary
ACOT1	ACSL1	ordinary
VAMP2	TRPV4	ordinary
PITPNM2	PLA2G12A	ordinary
PPARD	ACSL6	ordinary
PLCB2	SYNJ1	ordinary
CCND2	E2F3	ordinary
ACTB	COPS7B	ordinary
FRAT1	PPP2R5E	ordinary
AGFG1	ACTR3	ordinary
DCP2	LSM7	ordinary
LTBR	TRAF3	ordinary
BRAF	AGK	ordinary
ANO9	SLC26A6	ordinary
AQP1	NT5E	ordinary
EPHB4	LIMK2	ordinary
TRPV4	TPM1	ordinary
EFNB1	GIT1	ordinary
ACHE	SLC44A3	ordinary
COPS6	FBXO32	ordinary
APBA1	STXBP1	ordinary
BIRC2	NOD1	ordinary
PTGS1	PTGDS	ordinary
SLC20A1	SLC4A4	ordinary
RAP1A	SYK	ordinary
BOC	SMO	ordinary
CCT8	BBS5	ordinary
EBNA1BP2	LAS1L	ordinary
PNPLA2	AQP3	ordinary
LRP10	AGRN	ordinary
MAOA	PRDX2	ordinary
NAA35	ACLY	ordinary
OGDH	GCDH	ordinary
CDK6	TFDP2	ordinary
TIGAR	PFKP	ordinary
GUCY1A3	PRKG1	ordinary
ATP6V0D1	PYGB	ordinary
CRTAP	COL1A1	ordinary
USP4	RBCK1	ordinary
LRP5	FZD6	ordinary
DDX58	CASP10	ordinary
PTP4A2	RABGGTB	ordinary
CHD4	KAT6A	ordinary
NFYC	HSPA5	ordinary
GLB1L	GBA	ordinary
HEXA	CTSA	ordinary
SBF2	PIP4K2B	ordinary
RRAGA	CALM3	ordinary
PLBD1	LPCAT4	ordinary
POLR1C	HIST1H2BN	ordinary
DDAH2	ASS1	ordinary
ADCY4	PDE4D	ordinary
ACSM1	GLYATL1	ordinary
PGM2L1	PGP	ordinary
GTF2H5	POLR2I	ordinary
MTMR3	PI4KA	ordinary
PRKAB2	LAMTOR5	ordinary
MOCOS	AARS	ordinary
AGPS	ACAA1	ordinary
FCHO1	AP2M1	ordinary
PRDX1	TXN	ordinary
CBFB	SOCS3	ordinary
PIAS1	SP3	ordinary
WDR19	PRKAR1A	ordinary
PDE8B	AMPD2	ordinary
RB1	ORC6	ordinary
POLD4	RAD51AP1	ordinary
SERPINA5	FGG	ordinary
IRAK2	IKBKG	ordinary
PRKG1	KCNMA1	ordinary
AGO3	RUNX1	ordinary
MSRB2	MAT2A	ordinary
PHB	KSR1	ordinary
DNM1	CLTA	ordinary
MTA2	BRPF1	ordinary
PHF20	MDM4	ordinary
ADIPOR1	MLXIPL	ordinary
MLXIPL	ACACB	ordinary
NFYB	DDIT3	ordinary
PSMB5	LTBR	ordinary
CHD3	EP300	ordinary
SCLY	GPT	ordinary
PRPS1	HPRT1	ordinary
AGPAT2	LPIN2	ordinary
TRMT112	GSPT2	ordinary
GAB2	FGFR1OP2	ordinary
FAAH	CYP2J2	ordinary
AGMO	AQP7	ordinary
PFKM	ALDOB	ordinary
ALDOC	GPD1	ordinary
ELOVL7	HSD17B3	ordinary
NUP50	CPSF3	ordinary
LRP12	GPC6	ordinary
SLC38A1	SLC38A2	ordinary
PPP2R1A	PPP2R5C	ordinary
KAT2B	HEY2	ordinary
FBXL5	IREB2	ordinary
FRAT2	AMER1	ordinary
PGD	RPIA	ordinary
RPE	PPP2CA	ordinary
TTC21B	AKAP5	ordinary
GUCY1B3	PDE5A	ordinary
CCAR2	SERPINH1	ordinary
CAMK2B	DYSF	ordinary
SLC35B3	HS2ST1	ordinary
ENPP7	CERK	ordinary
INO80D	COPS6	ordinary
BPNT1	NSF	ordinary
MAPK7	MEF2A	ordinary
IQGAP1	MAP2K1	ordinary
ATG12	ATG10	ordinary
PIK3C3	RUFY1	ordinary
AMPD2	IMPDH2	ordinary
ADSS	ADSL	ordinary
GPAT3	PLA2G2A	ordinary
NCK1	MAPK14	ordinary
SLC25A13	ASNS	ordinary
VAC14	MTM1	ordinary
VTA1	CHMP4C	ordinary
C1D	WDR43	ordinary
GALE	NUDT14	ordinary
PIK3R1	ITSN1	ordinary
PSMD11	BLMH	ordinary
PDK4	DLD	ordinary
ERCC1	RFC4	ordinary
PI4K2B	REPS2	ordinary
ALG8	ALG10	ordinary
NUP98	GEMIN5	ordinary
CHMP3	MAP1LC3A	ordinary
PLD1	DDHD1	ordinary
PPIB	COL4A1	ordinary
DCTN1	NR3C1	ordinary
TGS1	DDX20	ordinary
LPIN3	PNPLA2	ordinary
ATP1B3	SCN4B	ordinary
GDE1	GPAT4	ordinary
GPAT4	GPAT3	ordinary
CLCN5	CLCN2	ordinary
ANO5	SLC6A9	ordinary
OSTM1	ANO8	ordinary
POLR2B	ATR	ordinary
CCNH	TCF3	ordinary
PIK3CB	SNX18	ordinary
THRSP	ELOVL7	ordinary
SLC1A3	SLC25A12	ordinary
ABCB10	FLVCR1	ordinary
HMOX2	BLVRB	ordinary
APH1B	DTX4	ordinary
PAN3	EIF4A1	ordinary
UBE2D2	TLR3	ordinary
LIPC	LDLR	ordinary
HSD17B4	EHHADH	ordinary
AXIN1	NAMPT	ordinary
MTR	EPRS	ordinary
RHOC	PPP1R12B	ordinary
ARPC3	FZD4	ordinary
IL10RB	IL10RA	ordinary
TGFBR2	TGFBR1	ordinary
FBXW11	NFKB1	ordinary
CAMKMT	CALM2	ordinary
SIGIRR	TLR1	ordinary
MYO7A	RDH5	ordinary
RILP	DCTN2	ordinary
TLR2	TIRAP	ordinary
CEPT1	PTDSS2	ordinary
PLD3	PITPNM1	ordinary
CEACAM1	ITGA5	ordinary
STK11	PRKAA2	ordinary
USP13	USP10	ordinary
ATF6	CALR	ordinary
MTMR2	PITPNB	ordinary
ST13	HSPA9	ordinary
UBC	RFC3	ordinary
SLC35A3	MGAT4B	ordinary
USP1	DCLRE1B	ordinary
IFNAR2	IFNAR1	ordinary
FAM120B	FABP4	ordinary
SLC2A1	GSTO2	ordinary
HERC2	KDM4A	ordinary
RPS6KA3	CREB1	ordinary
FZD1	PPP2R1A	ordinary
RGS3	GNA11	ordinary
SEL1L	RPS27A	ordinary
VNN2	PANK3	ordinary
PRDX5	TXN2	ordinary
ACTR8	DDB1	ordinary
PAK1	CTNNA1	ordinary
HADHA	ACADM	ordinary
IGF2R	PLIN3	ordinary
UBXN7	COMMD2	ordinary
CNGA1	ACTA2	ordinary
SMURF1	PTCH1	ordinary
CYB5R4	FTH1	ordinary
LPIN1	PRKCA	ordinary
SUMF2	ARSG	ordinary
INO80C	RBX1	ordinary
TRRAP	TCF4	ordinary
GFER	CHCHD5	ordinary
CDC14B	MAPK6	ordinary
MAPK6	NCOA3	ordinary
HEXB	NEU1	ordinary
EFNA1	NGEF	ordinary
MVD	IDI1	ordinary
ANO7	SLC6A13	ordinary
MAPKAPK5	KALRN	ordinary
CFLAR	TNFSF10	ordinary
PLCH2	DGKQ	ordinary
SUCLA2	HADHB	ordinary
ATF4	ATF3	ordinary
NLK	TCF7L2	ordinary
ZFYVE9	SMAD3	ordinary
POLD2	RAD51	ordinary
ARNT	VEGFA	ordinary
CCNT1	SMAD4	ordinary
RIN3	RAB31	ordinary
SPTBN1	ARCN1	ordinary
HSCB	GLRX5	ordinary
IPPK	PPIP5K2	ordinary
RBBP4	TAF1B	ordinary
SLC25A26	MRM1	ordinary
RAB3GAP1	BICD2	ordinary
P3H3	COL6A1	ordinary
MGLL	PLD3	ordinary
ARHGEF7	PAK1	ordinary
CSNK2B	NCAPG	ordinary
NEK6	NUP62	ordinary
ARF1	COPZ1	ordinary
MYO5A	EXOC8	ordinary
NPAS2	KLF15	ordinary
NEK9	TPR	ordinary
SLC44A2	CHKB	ordinary
TPI1	GPD1L	ordinary
GPS1	COMMD4	ordinary
SPHK2	PLPP3	ordinary
MMP19	LAMC2	ordinary
GSR	CHAC2	ordinary
VPS4A	CHMP3	ordinary
CYP8B1	AKR1D1	ordinary
PYGL	PGM1	ordinary
PPP1R12A	MYH10	ordinary
CHCHD4	TIMM8A	ordinary
ABCA4	DHRS4	ordinary
ATP6V1A	ARL2	ordinary
RUNX1	NR4A3	ordinary
GPX8	P4HB	ordinary
PLIN3	RETSAT	ordinary
ACTR1A	FKBP4	ordinary
CLCN3	SLC12A6	ordinary
RAB3GAP2	DCTN4	ordinary
TALDO1	PFKFB4	ordinary
SOD1	PRDX1	ordinary
USP30	PTRH2	ordinary
DOLPP1	DPM1	ordinary
LRP6	GSK3B	ordinary
IDH3G	AASS	ordinary
AGBL2	SLC25A22	ordinary
TRAPPC1	RAB1B	ordinary
GATAD2A	BRD1	ordinary
HIST1H2BK	HIST1H4I	ordinary
MID1IP1	ELOVL1	ordinary
CREB3L3	APOA5	ordinary
RNF181	BCL10	ordinary
CTSC	CD74	ordinary
HSD17B7	EBP	ordinary
CRP	C1QC	ordinary
UBE2V1	TAB3	ordinary
USP8	LRIG1	ordinary
LCP2	PRKCB	ordinary
RAB10	EXOC1	ordinary
ARHGAP18	RHOQ	ordinary
TCIRG1	PICK1	ordinary
DENND2A	RAB9A	ordinary
GPR161	PDE3A	ordinary
LRIG1	EGFR	ordinary
SAR1B	APOB	ordinary
ERCC4	TOPBP1	ordinary
CAB39L	PRKAA1	ordinary
FIG4	MTMR12	ordinary
TP53BP2	TP53I3	ordinary
CHPT1	PAFAH1B1	ordinary
PAFAH1B2	DYNC1LI2	ordinary
NAGLU	GUSB	ordinary
ESD	MGST2	ordinary
FURIN	MMP11	ordinary
PROC	FGA	ordinary
CCND3	E2F5	ordinary
CASP3	STK4	ordinary
CPLX1	SLC1A2	ordinary
UBE2V2	SUMO2	ordinary
UBE2N	PELI1	ordinary
OTUD5	MAVS	ordinary
CBLB	NCK1	ordinary
METAP2	DARS	ordinary
CACNA1C	CACNA2D1	ordinary
CSNK1G2	LRP5	ordinary
SH3KBP1	PIK3AP1	ordinary
RAPGEF3	RAP1B	ordinary
SLC6A12	ANO10	ordinary
NUP62	CPSF1	ordinary
ARHGAP9	RHOG	ordinary
SLC44A3	SLC44A1	ordinary
WDR20	AR	ordinary
DIO1	SULT1C2	ordinary
SLC39A3	C1QBP	ordinary
FGFR1OP	WASF3	ordinary
SMAD4	BCL2L11	ordinary
UAP1	SLC35A3	ordinary
SLC35B4	B3GNT5	ordinary
TBL1XR1	TXNRD1	ordinary
RPS5	SNU13	ordinary
ACOT4	SLC27A2	ordinary
ACAT2	HMGCS1	ordinary
PAFAH1B1	DYNC1H1	ordinary
AGPAT3	PAFAH1B3	ordinary
ERCC3	POLR2B	ordinary
NEURL1B	DLL4	ordinary
CHRM3	GNAQ	ordinary
GEN1	DNA2	ordinary
TAB1	MAP2K7	ordinary
B3GAT3	GPC3	ordinary
RGS19	GNA15	ordinary
EFNB2	PAK2	ordinary
TNIK	MAP3K5	ordinary
SMC6	STAG1	ordinary
DDAH1	NMRAL1	ordinary
RBKS	PRPS2	ordinary
GGCX	VKORC1L1	ordinary
METAP1	MAT2B	ordinary
CLOCK	CRY1	ordinary
MTFMT	MTHFD1L	ordinary
MVB12A	UBA52	ordinary
SHMT2	AMT	ordinary
OXCT1	SDHA	ordinary
PEBP1	ITGB3	ordinary
PAH	TTL	ordinary
SEMA4D	RRAS	ordinary
GMPPB	GMDS	ordinary
RBL2	E2F1	ordinary
N6AMT1	ETF1	ordinary
BBS10	BBS9	ordinary
TRAF3	MAP3K14	ordinary
LIN7B	PPFIA3	ordinary
PAPPA2	IGFBP4	ordinary
IGF1	IRS1	ordinary
TIMM50	HSCB	ordinary
PTGES2	CBR1	ordinary
APH1A	DTX2	ordinary
ALDH18A1	OAT	ordinary
VNN1	PANK1	ordinary
CASP6	SATB1	ordinary
PNPO	DPH6	ordinary
RB1CC1	ATG14	ordinary
GSS	GSTM3	ordinary
METTL14	POLR2L	ordinary
RDH10	HSD17B1	ordinary
SPHK1	PLPP1	ordinary
RNF43	FZD8	ordinary
RNF2	BMI1	ordinary
PTEN	DOCK1	ordinary
PPFIA3	ACHE	ordinary
EXOSC4	TBL3	ordinary
GLE1	NUP188	ordinary
SLC4A4	FGF13	ordinary
ABL1	RAD52	ordinary
BAZ1B	H2AFV	ordinary
XRN1	LSM4	ordinary
TOMM5	CYC1	ordinary
PMM1	GMPPA	ordinary
TIMM17A	FXN	ordinary
DCUN1D5	UBE2F	ordinary
SLC9A1	SLC9A7	ordinary
MAGT1	MMGT1	ordinary
C4A	C4B	ordinary
SLC22A15	AKAP9	ordinary
E2F3	EED	ordinary
KBTBD7	NF1	ordinary
WDR77	GEMIN7	ordinary
FAM96B	POLD1	ordinary
RAB7A	CAPZA1	ordinary
CYB5B	KARS	ordinary
CYP4F3	CYP4F11	ordinary
B3GNT2	PRELP	ordinary
SEC24D	SEC31A	ordinary
MYH7B	MYO1C	ordinary
CSF2RB	STAT5A	ordinary
CHMP5	CHMP2B	ordinary
CHMP2A	GABARAP	ordinary
PIK3R3	ARRB1	ordinary
NLRC5	IFIH1	ordinary
NDC1	PHAX	ordinary
NMT2	AACS	ordinary
RIPK2	CARD11	ordinary
TMED5	WNT4	ordinary
PRKCD	CARD9	ordinary
SLC2A3	GSTO1	ordinary
EXOSC1	WDR46	ordinary
TAGAP	RAC2	ordinary
NAA30	ARFRP1	ordinary
TFG	SEC13	ordinary
SAP30	H2AFZ	ordinary
SLC25A37	LYRM4	ordinary
SLC39A8	PGLYRP2	ordinary
ERAP1	TAPBP	ordinary
PRKCB	STX4	ordinary
RANBP2	XPO1	ordinary
FBXW9	UBE2M	ordinary
DOLK	DPAGT1	ordinary
POLH	BRCA2	ordinary
PCOLCE	LOXL1	ordinary
CTSS	HLA-B	ordinary
DNAJC2	HSPA14	ordinary
TDP2	XRCC6	ordinary
XRCC5	PRKDC	ordinary
SREBF2	SQLE	ordinary
DGAT2	FITM2	ordinary
KDM4A	HERC2	ordinary
GANAB	CANX	ordinary
RFC2	RAD51C	ordinary
NHLRC1	EPM2A	ordinary
GNS	HEXA	ordinary
RNF111	GTF2H3	ordinary
SRC	QKI	ordinary
PPA1	PYGL	ordinary
ATG4B	GABARAPL1	ordinary
CLTA	BLOC1S1	ordinary
NRF1	TFB2M	ordinary
PEX10	UBE2D2	ordinary
LGR6	RNF43	ordinary
HDAC6	NAA35	ordinary
FECH	ABCB7	ordinary
ARF3	COPB2	ordinary
GCNT4	MUC20	ordinary
ATP6V1H	SLC25A4	ordinary
SREBF1	SCD	ordinary
ABCC1	GGT5	ordinary
CHEK2	RNF8	ordinary
INHBA	ACVR1C	ordinary
GZMH	IGFBP3	ordinary
C2CD5	EXOC6	ordinary
CACNB3	TRPM2	ordinary
CHPF	BCAN	ordinary
KCNAB1	ATP1A1	ordinary
PIK3AP1	TRIM24	ordinary
EXOSC8	WDR75	ordinary
PPP1R12B	MYH9	ordinary
GDA	RHBG	ordinary
CETN2	XPC	ordinary
SERPIND1	FGB	ordinary
CHST15	IMPAD1	ordinary
SCN4B	SLC4A7	ordinary
MBOAT1	PNPLA8	ordinary
PTDSS2	OSBPL8	ordinary
SOCS5	CUL5	ordinary
MICAL1	GSTP1	ordinary
DPM2	PIGL	ordinary
SAP30BP	H3F3B	ordinary
CPT1B	SLC25A20	ordinary
ERCC2	POLR2E	ordinary
PPP2R5D	RAF1	ordinary
ABCA3	ADRA2C	ordinary
HSD17B3	SRD5A2	ordinary
PDGFRA	BAG4	ordinary
DCUN1D2	CUL4A	ordinary
OSBPL5	PLA2G5	ordinary
SLC25A32	FTCD	ordinary
PFKP	ALDOC	ordinary
PRKCSH	PDIA3	ordinary
SMARCD3	SLC27A1	ordinary
SPTBN2	TMED9	ordinary
TREM2	ERLIN2	ordinary
HK2	GYS1	ordinary
AGPAT4	CDS1	ordinary
CCT4	BBIP1	ordinary
PLA2G16	PLA2G4C	ordinary
RAB3A	SLC1A1	ordinary
TNRC6C	NOTCH4	ordinary
PLCE1	DGKG	ordinary
PLCD4	DGAT1	ordinary
HIST1H4I	KDM4B	ordinary
BRAP	BRAF	ordinary
MTTP	APOA2	ordinary
BAG2	HSPA4L	ordinary
ADAMTS2	COL3A1	ordinary
CD3EAP	HIST1H2BC	ordinary
DHPS	EIF5A2	ordinary
BBS12	BBS7	ordinary
TOMM7	BCS1L	ordinary
MMP9	COL16A1	ordinary
CDK7	TAL1	ordinary
ATP6V1E1	UPP2	ordinary
GLS	ALDH18A1	ordinary
ACSM2A	GLYAT	ordinary
PFAS	RIMKLB	ordinary
PANK4	PPCS	ordinary
RFC1	NBN	ordinary
APOA1	CPNE3	ordinary
LAMTOR1	SLC3A2	ordinary
GAPVD1	RAB5B	ordinary
SMC5	SMC1A	ordinary
FCGR3A	CNTRL	ordinary
SHB	ITGAV	ordinary
CNOT8	EIF4E	ordinary
GOT1	SLC25A13	ordinary
FDX1	FDXR	ordinary
RRAGD	NOS3	ordinary
GABPA	MTERF1	ordinary
XDH	GPX2	ordinary
LRRFIP1	NCKAP1	ordinary
NCSTN	EPHB4	ordinary
HSPH1	HSPA1B	ordinary
PLCD3	ITPKC	ordinary
MYLK	MYH14	ordinary
SPTLC2	KDSR	ordinary
SLC1A1	SLC7A11	ordinary
CLEC7A	PLCG2	ordinary
MAPKAP1	SGK1	ordinary
VDAC1	MCU	ordinary
ARL2	ATP6V1F	ordinary
CIAPIN1	NUBP1	ordinary
ERBB3	FGFR4	ordinary
KPNA1	HMGA1	ordinary
POLE3	RMI1	ordinary
ASNS	NARS	ordinary
RAD51D	BRCA1	ordinary
TKFC	TALDO1	ordinary
SLC25A16	ALDH6A1	ordinary
CDKN2D	CCND3	ordinary
ESPL1	CENPL	ordinary
SNX18	ADRB2	ordinary
QTRT1	GDA	ordinary
MTMR12	PI4K2B	ordinary
SARM1	TICAM1	ordinary
IL27RA	TYK2	ordinary
RBPJ	GZMB	ordinary
SLC37A1	G6PC	ordinary
VPS4B	CHMP2A	ordinary
ATG9A	PIK3R4	ordinary
IRAK3	TLR2	ordinary
TNRC6B	NLK	ordinary
IL2RG	JAK3	ordinary
COPS5	COMMD5	ordinary
BHLHE41	PER2	ordinary
NRG1	ERBB3	ordinary
PRKCA	STXBP3	ordinary
UBE2M	FBXW11	ordinary
CNOT1	EIF4G1	ordinary
NEK7	NDC1	ordinary
PRCP	KLKB1	ordinary
CLTCL1	AGTR1	ordinary
AOC3	GPX3	ordinary
EXOSC5	RRP7A	ordinary
TSC2	MLST8	ordinary
B3GNT5	MUC1	ordinary
TRPM8	MYH3	ordinary
HK1	G6PD	ordinary
C1QC	C1S	ordinary
TPCN1	VCL	ordinary
PAPSS1	SLC35B3	ordinary
EDC4	PATL1	ordinary
F2	IGFALS	ordinary
ACSL4	AGPAT3	ordinary
AMDHD2	GNPDA1	ordinary
GNPDA2	GFPT1	ordinary
PMPCA	GRPEL1	ordinary
SLC37A4	G6PC3	ordinary
PPP3CC	YWHAH	ordinary
CCZ1B	RAB7A	ordinary
PCCB	MCEE	ordinary
HMGB1	DFFB	ordinary
EXOSC6	NOP56	ordinary
DDX21	TEX10	ordinary
EXOSC2	NOL11	ordinary
PIKFYVE	MTMR2	ordinary
ADAM17	NRG1	ordinary
FES	PLXNA3	ordinary
PLXNA2	CDK5	ordinary
ADH1C	DHRS3	ordinary
GTF2H4	GTF2F2	ordinary
HBEGF	ERBB2	ordinary
RAB18	DYNC1I2	ordinary
MBOAT2	PEMT	ordinary
CYLD	SHARPIN	ordinary
SERPINC1	F5	ordinary
NUP43	KPNA5	ordinary
SLC4A2	SLC12A7	ordinary
AAAS	SNRPD3	ordinary
IDH2	AADAT	ordinary
SMPD2	ASAH2	ordinary
SEC23A	LMAN1	ordinary
MBOAT7	PIGQ	ordinary
TTYH3	SLC6A1	ordinary
POLD3	RMI2	ordinary
HS3ST1	SDC4	ordinary
SMAD2	JUNB	ordinary
RUVBL2	DKC1	ordinary
ISCU	AARS2	ordinary
SGK1	SCNN1D	ordinary
CCT2	TTC8	ordinary
CLU	C9	ordinary
C8G	C6	ordinary
NUP85	SNRPG	ordinary
MCU	SLC8B1	ordinary
GNPDA1	PFKL	ordinary
PLCB3	PRKCZ	ordinary
TMPRSS6	LAMC1	ordinary
TFRC	ARPC1B	ordinary
C4B	C4A	ordinary
RRP1	UTP18	ordinary
RFC5	PALB2	ordinary
ZAP70	GRAP2	ordinary
CDA	UPP1	ordinary
TAP2	ERAP1	ordinary
MAP2K2	KDM7A	ordinary
SCMH1	CBX4	ordinary
LTA4H	CYP4A11	ordinary
DECR1	ECI1	ordinary
ITSN1	ARPC4	ordinary
DNAL4	AP2A2	ordinary
SLC35B2	CHST1	ordinary
MCCC1	CA5B	ordinary
PTPN12	PDGFB	ordinary
APOA5	APOC3	ordinary
CA12	BST1	ordinary
AAK1	TF	ordinary
PRKAA2	TSC1	ordinary
GGCT	CARS	ordinary
ATG13	AMBRA1	ordinary
SLC30A1	KNG1	ordinary
FGF13	AHCYL2	ordinary
MAML2	HEY1	ordinary
PSEN1	CDH1	ordinary
CDH1	SRC	ordinary
ITPA	NT5C2	ordinary
AKT1	FOXO1	ordinary
ABCD4	ABCC1	ordinary
RAE1	NXF1	ordinary
MDC1	TP53BP1	ordinary
NEDD4L	UBC	ordinary
MAPK8	BMF	ordinary
PNPLA8	LPCAT3	ordinary
MAPKAPK2	ZFP36	ordinary
KLRD1	ITK	ordinary
NDST1	GPC1	ordinary
DPEP2	CAMK2G	ordinary
COLGALT1	COL1A2	ordinary
PDGFRB	FYN	ordinary
NCOA6	GRHL1	ordinary
EPHB2	EFNB1	ordinary
FXYD1	MFSD2A	ordinary
PITPNA	PLCG1	ordinary
BCAT2	ADHFE1	ordinary
ALDH1A3	FABP5	ordinary
ARF6	FCHO2	ordinary
ATG101	DYNLL1	ordinary
CNOT10	PABPC1	ordinary
NME2	ADCY4	ordinary
HADHB	PLA2G6	ordinary
MMP14	LAMB1	ordinary
THEM4	ACSM5	ordinary
IL2RB	STAT5B	ordinary
GBA2	SLC2A1	ordinary
GGPS1	FDFT1	ordinary
FDFT1	PLPP6	ordinary
PLA2G4C	MBOAT1	ordinary
SLC25A28	FECH	ordinary
VPS28	PPIA	ordinary
P3H2	COL14A1	ordinary
PSMD2	TNFSF12	ordinary
FGFR1OP2	ABI1	ordinary
CHST14	BGN	ordinary
PPP1CB	CSNK1D	ordinary
ARPC1A	LDLRAP1	ordinary
PC	MDH2	ordinary
GLUL	CTPS1	ordinary
CAMK2D	MYO6	ordinary
TPST1	PODXL2	ordinary
GGT5	DLG1	ordinary
SUPT5H	SNAPC4	ordinary
NFKB1	IL18	ordinary
PFKL	ALDOA	ordinary
RAD51C	CDK4	ordinary
SLC5A3	SLC9A6	ordinary
PSMD14	CDC16	ordinary
TYK2	IL27RA	ordinary
RIC1	RAB6A	ordinary
HHAT	SHH	ordinary
ACTL6A	COPS3	ordinary
ALG3	MPDU1	ordinary
AOX1	PRDX6	ordinary
YME1L1	SMDT1	ordinary
PIK3R4	FIG4	ordinary
EXOSC9	UTP3	ordinary
TNFRSF10C	TNFRSF10D	ordinary
TNFRSF10A	TNFRSF10B	ordinary
MED15	ANGPTL4	ordinary
KCNJ5	ATP1B2	ordinary
TXNRD1	SEPHS2	ordinary
XYLT1	HSPG2	ordinary
MKNK1	PPP2CB	ordinary
TRAF1	TRADD	ordinary
ACTR5	DDB2	ordinary
HRAS	AGTRAP	ordinary
PTK2	WASL	ordinary
INPPL1	BIN1	ordinary
TNFRSF10D	TNFRSF10C	ordinary
PTPN6	LYN	ordinary
ATG4D	MAP1LC3B	ordinary
PCSK6	GPIHBP1	ordinary
MADD	RAB27A	ordinary
RORA	SREBF1	ordinary
MC1R	GNAS	ordinary
PDGFB	PDGFRB	ordinary
ALS2	RAB5A	ordinary
AGBL3	TPGS1	ordinary
PKM	ATP6V1D	ordinary
WTAP	NCBP2	ordinary
PEX2	UBE2D1	ordinary
KCNJ11	FXYD2	ordinary
CAMK2G	EPB41L1	ordinary
POLK	RAD50	ordinary
ALDOA	GNPAT	ordinary
PGK1	GAPDH	ordinary
NFYA	TM7SF2	ordinary
IDI1	FDPS	ordinary
PAPSS2	SLC35B2	ordinary
NUP205	KPNA4	ordinary
CSNK1D	GOSR2	ordinary
MED11	LPL	ordinary
CNOT6L	EIF4B	ordinary
P3H1	COL6A3	ordinary
GABARAPL1	ATG3	ordinary
ATIC	ADSSL1	ordinary
FTCD	TAT	ordinary
ACACA	ELOVL6	ordinary
NUP210	SNRPF	ordinary
BCAT1	EGLN3	ordinary
PHYKPL	ALDH7A1	ordinary
HSD17B12	SRD5A1	ordinary
PGAM1	ENO1	ordinary
ASRGL1	FARSA	ordinary
CA2	GCHFR	ordinary
PIAS2	SUZ12	ordinary
ABCB7	ABCG2	ordinary
ABCA5	ABCA9	ordinary
ABCA6	LCAT	ordinary
ANGPT1	NRAS	ordinary
GATAD2B	BRPF3	ordinary
TPK1	SLC25A19	ordinary
ALG13	ALG1	ordinary
IRF3	TBK1	ordinary
CTTN	VAMP2	ordinary
SEPT7	CDC42EP3	ordinary
ASPG	PAICS	ordinary
CAB39	PRKAB2	ordinary
XYLT2	GPC4	ordinary
IKBKE	IRF7	ordinary
MAGED1	MAPK8	ordinary
ATP6V1F	NME2	ordinary
FOLH1	TTLL7	ordinary
ALS2CL	RAB5C	ordinary
NFIA	POLR3A	ordinary
LY86	CD14	ordinary
PLCB1	DGKE	ordinary
PTPRC	HLA-DRA	ordinary
LMBRD1	MMACHC	ordinary
SULT1A1	BPNT1	ordinary
CDK2	MCM8	ordinary
TRAF6	ITGB3BP	ordinary
PLXNA3	CRMP1	ordinary
LDHA	SLC16A1	ordinary
ALDH3A2	ACSL5	ordinary
RAPGEF2	HRAS	ordinary
PPME1	PPP2R2A	ordinary
MTMR9	PI4K2A	ordinary
HMOX1	BLVRA	ordinary
PCK2	SLC25A1	ordinary
PRKAG1	TBC1D1	ordinary
ADA	GLUL	ordinary
OSBP	SGMS1	ordinary
TAX1BP1	XIAP	ordinary
PIP5K1C	PLCB2	ordinary
PRKAG2	RHEB	ordinary
HIST1H2BN	EYA3	ordinary
CASP7	VIM	ordinary
CD274	HLA-DRB1	ordinary
CES3	ABCG1	ordinary
BRIP1	FANCE	ordinary
TULP3	PDE7A	ordinary
PSME3	SPOPL	ordinary
ITGA2	MET	ordinary
PPM1A	PRKAG1	ordinary
PNPLA4	DGAT2	ordinary
ATP6V1C2	AK7	ordinary
PPA2	SUCLA2	ordinary
GTF2H1	NCBP1	ordinary
TRAPPC8	RAB1A	ordinary
CDC73	UBE2A	ordinary
LZTFL1	ARL6	ordinary
ARHGEF28	LIMK1	ordinary
MLX	AGPAT1	ordinary
CYBRD1	HEPH	ordinary
PLAT	PDGFC	ordinary
TPR	WDR33	ordinary
TOMM20	ATP5A1	ordinary
E2F4	CDK1	ordinary
LMNB1	HIRA	ordinary
FYN	RELN	ordinary
ALDH4A1	BCAT2	ordinary
CDC37	ZMYM2	ordinary
POLR2G	NELFE	ordinary
EVC	SUFU	ordinary
GLUD1	OGDH	ordinary
USP18	IFIT1	ordinary
KCNJ15	FXYD1	ordinary
COMMD4	NEDD8	ordinary
PIK3C2B	FNBP1L	ordinary
LRRK2	PTK6	ordinary
PSENEN	NGFR	ordinary
SAV1	LATS2	ordinary
XYLB	PPP2R5D	ordinary
STK3	MOB1B	ordinary
SIRT1	CLOCK	ordinary
ANO10	SLC6A12	ordinary
RUVBL1	COPS7A	ordinary
GPD1	GPAT2	ordinary
PRKAA1	LAMTOR3	ordinary
MAOB	GPX1	ordinary
GLYAT	ACSM2A	ordinary
IL4R	STAT6	ordinary
PIGB	PIGF	ordinary
PIGO	PIGU	ordinary
KDM5B	CDKN1A	ordinary
CATSPER2	TPM4	ordinary
CD180	LY96	ordinary
AGPAT1	HDAC6	ordinary
ABCD1	PITPNM2	ordinary
GMPS	TTLL5	ordinary
TAP1	ERAP2	ordinary
NME1	ATP6V0B	ordinary
EBI3	IL6ST	ordinary
RNF216	RNF135	ordinary
MARC2	AZIN2	ordinary
ACOX1	CAT	ordinary
NUP93	CPSF4	ordinary
CALM1	IQGAP2	ordinary
AKR1D1	AKR1C3	ordinary
PPIA	NFATC2	ordinary
MAPK9	ATF2	ordinary
PRMT1	HDAC1	ordinary
PIP4K2B	GNG11	ordinary
PSMC4	SPOP	ordinary
COMT	BHMT2	ordinary
SUOX	PRDX3	ordinary
PEX12	UBE2D3	ordinary
SENP1	SUMO3	ordinary
PRODH	PYCR2	ordinary
NARFL	NUBP2	ordinary
LPIN2	PNPLA3	ordinary
DYNC1H1	HSP90AA1	ordinary
PLAU	HRG	ordinary
ANXA2	PLAT	ordinary
USP11	NFKBIA	ordinary
MMP7	SPP1	ordinary
CNOT11	EIF4A3	ordinary
TOR1A	STON1	ordinary
DOHH	EIF5A	ordinary
CD3E	LCK	ordinary
MFSD2A	CAMK2D	ordinary
LPCAT1	PLD6	ordinary
TRAPPC11	CHML	ordinary
BARD1	AQR	ordinary
GNL3	PELP1	ordinary
NUP133	SLBP	ordinary
TKT	GPI	ordinary
SMPD4	VAPB	ordinary
ST6GALNAC6	SLC35A1	ordinary
CASK	PPFIA1	ordinary
PSMB4	OAZ3	ordinary
E2F5	MYBL2	ordinary
MOB1A	WWTR1	ordinary
ARHGEF26	RHOC	ordinary
DENND4C	CHM	ordinary
CISH	IL2RG	ordinary
PPP1CC	CRY2	ordinary
MAPK11	CBX2	ordinary
HDAC7	PML	ordinary
DCTD	TYMS	ordinary
SLC6A9	ANO5	ordinary
AQR	ERCC6	ordinary
TLR3	MAP3K7	ordinary
RBBP7	CDKN2A	ordinary
NFRKB	COPS4	ordinary
INPP5B	ITPK1	ordinary
CDS2	PGS1	ordinary
TAF1A	H3F3A	ordinary
AGBL5	TTLL1	ordinary
L2HGDH	DLST	ordinary
SLC12A7	SLC12A2	ordinary
LIG3	ZNF830	ordinary
CYB5RL	CP	ordinary
ARFGAP1	KDELR1	ordinary
NF1	RASA1	ordinary
CYP4F2	CYP4F22	ordinary
PORCN	WNT5B	ordinary
CPSF6	CYFIP2	ordinary
SIAH1	SNCAIP	ordinary
ALAS1	HADHA	ordinary
B4GALT7	SDC2	ordinary
ABCA2	APOA1	ordinary
S100A10	PLG	ordinary
MPDU1	ALG12	ordinary
POLB	PARP2	ordinary
PARP1	SMAD2	ordinary
INPP5E	PLEKHA8	ordinary
PSAT1	PSPH	ordinary
CHKA	PCYT1A	ordinary
UBE2D3	SMAD9	ordinary
RNF168	BARD1	ordinary
BCHE	SLC44A5	ordinary
CCT5	BBS4	ordinary
GYS1	GYG1	ordinary
PGP	PLD2	ordinary
RGS5	GNAI3	ordinary
GDPD1	GDPD5	ordinary
GNAL	PDE3B	ordinary
ABCC9	ATP1B1	ordinary
NUP107	SNRPD2	ordinary
LIMK1	CFL1	ordinary
MORC2	NAA30	ordinary
IL33	BRK1	ordinary
HEY1	HEYL	ordinary
PNP	XDH	ordinary
ASNA1	SEC61B	ordinary
PLXNA1	DPYSL3	ordinary
ABCA1	CPNE1	ordinary
LDHB	SLC16A3	ordinary
PPP1R13B	BAX	ordinary
IER3	PPP2R5B	ordinary
CYB5R1	SLC40A1	ordinary
GPSM1	GNB5	ordinary
DGKQ	LPIN3	ordinary
PLCG1	DGKD	ordinary
SUPT16H	ATM	ordinary
DENND6A	RAB14	ordinary
RPTOR	ULK1	ordinary
DNAJB6	HSPA2	ordinary
YES1	HBEGF	ordinary
FGA	F13A1	ordinary
MED25	CEBPA	ordinary
SLC39A10	S100A8	ordinary
MMS19	ERCC2	ordinary
SYDE2	RHOT1	ordinary
RAB33B	MAN1A2	ordinary
ADRA2C	GNG7	ordinary
GCHFR	PTS	ordinary
MTHFD1	ALDH1L1	ordinary
HPS4	RAB32	ordinary
SLC6A8	CKB	ordinary
MCCC2	AUH	ordinary
QDPR	AGMO	ordinary
TEK	KRAS	ordinary
GAPDH	TPI1	ordinary
RGS1	GNAI2	ordinary
CTSA	GLB1L	ordinary
BDH1	OXCT1	ordinary
MEF2D	PPARGC1A	ordinary
BCKDK	BCKDHB	ordinary
EPAS1	HIGD1A	ordinary
CLCN7	BEST1	ordinary
EIF5	EIF3J	ordinary
SHMT1	ALDH9A1	ordinary
EP400	UBN1	ordinary
ETHE1	SUOX	ordinary
PAFAH1B3	CAPZB	ordinary
PPIP5K1	IP6K3	ordinary
MAPK12	MEF2D	ordinary
FDPS	GGPS1	ordinary
OCRL	MTMR1	ordinary
STAT3	FOS	ordinary
NME4	NADK2	ordinary
NADK2	MCCC2	ordinary
RBL1	CCNA2	ordinary
DNM2	AP2A1	ordinary
SMC4	NCAPD3	ordinary
SUV39H1	HIST1H2AE	ordinary
BLNK	PIK3CD	ordinary
PINK1	MFN2	ordinary
ITCH	NOD2	ordinary
ABHD14B	SULT1A1	ordinary
HGF	FCGR3A	ordinary
PLK2	CENPJ	ordinary
HK3	SLC37A2	ordinary
RDH16	ALDH1A3	ordinary
TAB2	MAP2K6	ordinary
METTL3	POLR2H	ordinary
CYP17A1	SULT2A1	ordinary
ADH1A	ALDH1A2	ordinary
RNF8	CHEK2	ordinary
PSMD10	ANAPC10	ordinary
DAXX	MDM2	ordinary
DVL3	IL1RAP	ordinary
LPL	APOE	ordinary
UGP2	PPP1R3C	ordinary
MAPK3	RPS6KA5	ordinary
SLC8A1	SPARC	ordinary
PLA2G6	CYP2U1	ordinary
NRP1	DPYSL2	ordinary
ABHD12	PLD1	ordinary
PPP2CB	SPRY2	ordinary
CSNK1E	DVL3	ordinary
SHC1	ITPR1	ordinary
CDK5	LMNB1	ordinary
COPS7B	CCNF	ordinary
CRKL	RAP1A	ordinary
NIPAL1	MRS2	ordinary
ATP6V1C1	AK9	ordinary
HADH	ACAT1	ordinary
[truncated: 402 more rows]

## Sheet: LUAD
gene1	gene2	type
SP1	IDI1	critical
ITGA4	ITGAL	critical
HLCS	ACACA	critical
ITGAL	ITGA4	critical
SMAD7	KEAP1	critical
ABCD4	MMACHC	critical
PNP	XDH	critical
APIP	ENOPH1	critical
KMT5A	PHF8	critical
CYP27B1	CYP24A1	critical
SRM	DHPS	critical
ATG101	DYNLL1	critical
PIGB	PIGF	critical
PIGL	PIGW	critical
PECR	PHYH	critical
PTPMT1	CRLS1	critical
SRD5A3	DOLK	critical
CRYM	PIPOX	critical
PMVK	MVD	critical
OGDH	GCDH	critical
SLC18A2	SLC6A3	critical
RNF152	RRAGA	critical
CTSK	MMP7	critical
CTSD	COL18A1	critical
NANS	NANP	critical
NMNAT2	NADSYN1	critical
COQ2	COQ6	critical
IDUA	SGSH	critical
HIPK2	CBFB	critical
GNS	HEXA	critical
PGLS	PGD	critical
HDC	HNMT	critical
ATP7A	ATOX1	critical
MTHFD2	MTHFD2L	critical
ADSL	ATIC	critical
RALGDS	RALB	critical
AURKA	PHLDA1	critical
MCCC2	AUH	critical
SLC35D1	POMGNT2	critical
CSNK1G2	GSK3B	critical
AFMID	KMO	critical
WWOX	TFAP2C	critical
DMPK	PLN	critical
SLC25A10	MDH1	critical
ALG1	ALG2	critical
ALG6	ALG8	critical
FUK	FPGT	critical
PHYH	HACL1	critical
AZIN2	AGMAT	critical
MDM2	DYRK2	critical
MDM4	JMY	critical
CRK	KIDINS220	critical
LGMN	TLR7	critical
PKN1	PPP1R14A	critical
FUOM	FUK	critical
G6PD	PGLS	critical
HMOX1	BLVRB	critical
ALAD	HMBS	critical
PDXK	PNPO	critical
MTAP	APRT	critical
GMDS	TSTA3	critical
LSS	CYP51A1	critical
RPS6KA5	ATF1	critical
METTL22	KIN	critical
DMGDH	SARDH	critical
CDO1	CSAD	critical
NSDHL	HSD17B7	critical
COX10	COX15	critical
TJP1	GJA1	critical
ACSM3	ACADS	critical
TRIM21	DDX41	critical
KMO	KYNU	critical
ZNF385A	SFN	critical
PPCS	PPCDC	critical
ATF2	MSH2	critical
TBC1D25	RAB33B	critical
CDC25B	CDK2	critical
SENP1	SUMO3	critical
SLC27A2	AMACR	critical
AMD1	SMS	critical
LIAS	MARS2	critical
PRKCZ	SPHK1	critical
CTSB	COL15A1	critical
PCYT1A	CHPT1	critical
UBA3	SKP1	critical
LIPT1	DHTKD1	critical
DTX4	ZBP1	critical
HPGDS	AKR1C3	critical
TIMP2	MMP2	critical
IP6K1	PPIP5K2	critical
HENMT1	TDRKH	critical
CARNS1	CARNMT1	critical
USP13	USP10	critical
USP10	SNX3	critical
USP19	RNF123	critical
BAP1	HCFC1	critical
TSN	AGO2	critical
TPK1	SLC25A19	critical
RFK	FLAD1	critical
MST1	MST1R	critical
MTHFD1L	MTFMT	critical
LMBRD1	ABCC1	critical
MTFMT	MTHFD1L	critical
NTN1	DCC	critical
CAT	NUDT12	critical
ARSA	GALC	critical
ARSB	IDS	critical
GHR	IRS1	critical
PROS1	F5	critical
HYKK	PHYKPL	critical
NAE1	UBA3	critical
TSPO	FDX1	critical
TGFB1	ZFHX3	critical
RUNX2	LGALS3	critical
ESR1	KCTD6	critical
MSMO1	NSDHL	critical
DCPS	NT5C3B	critical
MAN2B2	MANBA	critical
MAN2B1	MAN2B2	critical
LZTFL1	ARL6	critical
AKR1A1	CRYL1	critical
AMT	SHMT2	critical
HMBS	UROS	critical
PUM2	DCUN1D3	critical
BPHL	VARS	critical
LDLRAP1	LDLR	critical
HMOX2	BLVRA	critical
FGR	LRP8	critical
C1QBP	F12	critical
DHODH	UMPS	critical
ZBED1	CHD3	critical
LRP6	CSNK1A1	critical
CDS2	PGS1	critical
ESRRA	PERM1	critical
IDS	HEXB	critical
SQLE	LSS	critical
FOXM1	CENPF	critical
SH2B1	GHR	critical
HSD3B7	PTGIS	critical
IGF2	IGF1R	critical
NUDT3	NUDT4	critical
NUDT4	NUDT3	critical
UGDH	SLC35D1	critical
HIF1A	RORA	critical
CHEK1	WEE1	critical
PTDSS1	OSBPL10	critical
CP	HEPH	critical
PEX12	UBE2D3	critical
DENND3	RAB12	critical
PTS	SPR	critical
RNF43	FZD6	critical
SIAH2	SNCAIP	critical
PIAS4	MTA1	critical
SAE1	UBA2	critical
IGF1R	IRS2	critical
CHKB	PCYT1A	critical
EEF1A2	EEF1A1	critical
ERBB4	CXCL12	critical
CERK	CPTP	critical
DNAL4	CLTC	critical
ATG13	AMBRA1	critical
PGM3	UAP1	critical
MAPK8	BMF	critical
PPCDC	COASY	critical
FDX1	FDXR	critical
MMP15	NID1	critical
MMP10	MMP9	critical
PPP1R1B	PDE4B	critical
CPOX	PPOX	critical
ALG11	RFT1	critical
GPHN	MOCOS	critical
CASP7	VIM	critical
GNPNAT1	PGM3	critical
PDSS1	COQ2	critical
DEGS2	ACER3	critical
SGPL1	ALDH3B1	critical
UROS	UROD	critical
SERPINE2	VWF	critical
PGM2	DERA	critical
MCCC1	CA5B	critical
ZDHHC2	CKAP4	critical
SMS	SAT1	critical
F5	F8	critical
GSTZ1	FAH	critical
HSD17B4	EHHADH	critical
HGS	STAM2	critical
HGD	GSTZ1	critical
BACE1	APP	critical
CSK	PDCD1	critical
RANBP10	RANBP9	critical
HACL1	ALDH3A2	critical
XPO1	MAPK4	critical
SC5D	DHCR7	critical
ENOPH1	ADI1	critical
PGAM5	FUNDC1	critical
GPCPD1	ETNK2	critical
SEPHS2	SEPSECS	critical
PCBD1	QDPR	critical
OTUB1	RNF128	critical
PRMT3	RPS2	critical
HMGCR	MVK	critical
USP44	CDC20	critical
USP47	POLB	critical
PPARGC1B	ATP5B	critical
GALT	GALE	critical
HMGCS1	HMGCR	critical
SORD	XYLB	critical
ALDH1A1	GLYCTK	critical
PLIN3	RETSAT	critical
ADAM9	COL17A1	critical
ANKRD27	RAB21	critical
MOCS1	MOCS2	critical
ACO1	IDH1	critical
DHRS9	HSD17B1	critical
KITLG	SH2B2	critical
SLC2A5	KHK	critical
ECHS1	HADH	critical
METTL21A	HSPA8	critical
SH2D2A	AXL	critical
DZIP1	SPOP	critical
RGP1	RAB6A	critical
NLRX1	RNF135	critical
MTF1	CSRP1	critical
TBC1D16	RAB4A	critical
NPM1	NOP2	critical
RIC1	RAB6B	critical
LRP5	FZD8	critical
OTUD5	TRIM25	critical
NLRC5	IFIH1	critical
USP28	CLSPN	critical
VNN1	PANK1	critical
ECSIT	MAP3K1	critical
ABCC3	FABP6	critical
RNF216	MAVS	critical
SEPT7	CDC42EP2	critical
RENBP	NAGK	critical
UPP1	DPYD	critical
CYBRD1	SLC11A2	critical
P4HB	IL23A	critical
MTHFD2L	MTHFD2	critical
OMA1	OPA1	critical
VCPKMT	VCP	critical
MYO7A	RDH11	critical
GRB10	INSR	critical
MVK	PMVK	critical
YAP1	ITCH	critical
AASDHPPT	FASN	critical
HPSE	IDUA	critical
CYB5R3	CYB5A	critical
USP8	LRIG1	critical
USP7	FOXO4	critical
CEBPB	EBF1	critical
CEBPD	KLF5	critical
TOMM40	PINK1	critical
SUMF2	ARSE	critical
GALK1	GALT	critical
SYN1	SLC18A2	critical
HBEGF	GPNMB	critical
RWDD3	SAE1	critical
COL18A1	MMP13	critical
PHGDH	PSAT1	critical
ENPP1	ACP5	critical
CACNG4	TNNC1	ordinary
SNAP25	SLC1A7	ordinary
RAD50	ERCC8	ordinary
CACNA1D	CATSPER2	ordinary
SPTBN4	TMED3	ordinary
NECAP1	M6PR	ordinary
CD28	CNTRL	ordinary
MAP3K11	ARAF	ordinary
BRAF	AGK	ordinary
AHCYL2	FGF13	ordinary
SRI	ATP2B4	ordinary
HRAS	MACF1	ordinary
FASN	MORC2	ordinary
ACSL6	ZDHHC21	ordinary
P2RX4	NEB	ordinary
PSMD6	UBE2E1	ordinary
TAP1	ERAP1	ordinary
SHB	ITGAV	ordinary
ITGB3	KDR	ordinary
RAB43	STX6	ordinary
C4A	C4B	ordinary
CD247	NCKAP1L	ordinary
FGF1	INPP5K	ordinary
GTF2H3	POLR2J	ordinary
ABL1	CDKN1C	ordinary
ATP1A1	KCNAB1	ordinary
KCNK6	FXYD3	ordinary
INHBA	ACVR1C	ordinary
SMAD2	JUNB	ordinary
GPSM1	GPER1	ordinary
ACSL5	ZDHHC2	ordinary
NUP214	SNRPB	ordinary
MYH7B	EXOC3	ordinary
COPS4	FBXL5	ordinary
ATP2B1	ATP2A2	ordinary
EPN1	CLTB	ordinary
TRPC6	DYSF	ordinary
ADCY3	PDE2A	ordinary
C4B	C4A	ordinary
TP53	PIDD1	ordinary
TIGAR	PFKP	ordinary
VDAC2	MICU1	ordinary
ST13	HSPA9	ordinary
MAPK9	JUN	ordinary
PIK3C2B	FNBP1L	ordinary
FNBP1L	SCARB2	ordinary
PAPPA	IGFBP5	ordinary
CALM2	IQGAP3	ordinary
CACNB1	ATP2A1	ordinary
STIM1	ANXA6	ordinary
ARAF	ATG7	ordinary
STAT3	ZEB1	ordinary
PDGFRA	FGF2	ordinary
BAG4	HSPA12B	ordinary
MAPK1	ELK1	ordinary
PSMA7	TPP2	ordinary
CDC16	IL6	ordinary
SLC25A5	ATP6V1C2	ordinary
ADCY7	PDE1B	ordinary
VAMP7	SH3D19	ordinary
SLC35B4	B3GNT3	ordinary
TRPC4AP	ITGB5	ordinary
GNG5	CACNA1C	ordinary
SLC12A2	KCNN3	ordinary
CACNA2D3	TPM3	ordinary
EPN2	ITSN2	ordinary
CDC37	LRRFIP1	ordinary
GRAP2	RASGRP4	ordinary
ITCH	NOD1	ordinary
SEC24C	SEC23IP	ordinary
CTSC	CD74	ordinary
PSMA4	OAZ2	ordinary
HMGCL	NAGS	ordinary
AKAP9	MYL6B	ordinary
CAMK2D	MYO6	ordinary
PSMA2	ANAPC16	ordinary
CALM3	TRPM2	ordinary
IQGAP1	MAP2K1	ordinary
SLC25A16	ALDH6A1	ordinary
PPARA	CPT1A	ordinary
ALS2CL	GDI2	ordinary
CATSPER2	TPM4	ordinary
MBOAT2	PEMT	ordinary
LPCAT1	PLD6	ordinary
PIK3CD	NECAP2	ordinary
LAMTOR3	AIMP1	ordinary
NOS3	GUCY1A3	ordinary
RYR2	MYL12B	ordinary
CHM	RAB22A	ordinary
EIF5	EIF3J	ordinary
AHCYL1	TMOD3	ordinary
MCAT	ACSF3	ordinary
DLD	GCSH	ordinary
ARL2	ATP6V1F	ordinary
GPR161	PDE3A	ordinary
MCOLN3	SORBS1	ordinary
PDK3	PDHA1	ordinary
CS	ACO2	ordinary
ALDH6A1	PCCB	ordinary
ATP6V0C	ARL2BP	ordinary
GNB2	CUX1	ordinary
ITSN1	ARPC4	ordinary
ARPC5	VAMP4	ordinary
FRS2	CPSF6	ordinary
AAK1	TF	ordinary
IRS1	FGFR1OP	ordinary
INPP5J	PIK3R3	ordinary
INPP5D	FNBP1	ordinary
ACSL3	SPTLC1	ordinary
C2CD5	EXOC6	ordinary
CUL3	SPRED1	ordinary
PLCD4	DGAT1	ordinary
PSMB6	NUMB	ordinary
FXYD3	SCN1B	ordinary
COPS7A	SPSB2	ordinary
CNTRL	ABI2	ordinary
CDK11A	OFD1	ordinary
DYNC1H1	HSP90AA1	ordinary
SEPT2	PLK4	ordinary
RAC1	PKN1	ordinary
SLC25A11	LIMD1	ordinary
NCOR1	NR1D1	ordinary
PPARGC1A	ESRRA	ordinary
SUMF1	ARSD	ordinary
FZR1	ORC6	ordinary
PDGFRB	FYN	ordinary
BCR	WASF2	ordinary
RB1CC1	PIK3C3	ordinary
HIBCH	BCKDHB	ordinary
SLC4A4	SLC20A1	ordinary
SLC8B1	P2RX4	ordinary
FGFR1	GAB2	ordinary
GNAI1	ATP2B1	ordinary
NUP54	HNRNPC	ordinary
ERLIN2	FGFR1	ordinary
CLCN3	SLC12A6	ordinary
LYN	CD22	ordinary
CD22	CD79B	ordinary
ARFGAP2	YKT6	ordinary
RARRES3	GDPD1	ordinary
GNAI3	IQGAP1	ordinary
PDE4D	AMPD3	ordinary
NAA38	SLC27A5	ordinary
ACAT2	HMGCS1	ordinary
GUK1	TTC21B	ordinary
PIP4K2B	SNX9	ordinary
AP2A2	ROR1	ordinary
AKT2	GSK3A	ordinary
GMPR	IMPDH1	ordinary
GNAZ	PRKACA	ordinary
POM121C	KPNB1	ordinary
KPNA1	HMGA1	ordinary
MCEE	MUT	ordinary
SCARB2	INPP4B	ordinary
PSME1	BUB3	ordinary
ANAPC16	FZR1	ordinary
SBF1	PIGC	ordinary
PLA2G4E	MBOAT1	ordinary
HIP1	IGF2R	ordinary
WNT5A	LRP6	ordinary
MAP2K2	AGGF1	ordinary
PSMD10	ANAPC10	ordinary
ANXA2	PLAT	ordinary
ITSN2	ACTR2	ordinary
PSMD5	CDC27	ordinary
MAP2K1	AP3B1	ordinary
CACNA1F	MYH3	ordinary
PTPN22	HLA-DRA	ordinary
RPA2	SERPINH1	ordinary
GPAT3	PLA2G4A	ordinary
AP2M1	FZD5	ordinary
MMAA	SUCLG2	ordinary
TRPM7	SLC24A1	ordinary
RPS28	HEATR1	ordinary
EPHB6	LIMK2	ordinary
PAK2	MYLK	ordinary
ITPR3	STIM1	ordinary
PSMC1	MAD2L1	ordinary
LNPEP	HLA-E	ordinary
GNG12	CACNA2D2	ordinary
ITPR2	ACTG2	ordinary
RANBP2	KPNA5	ordinary
BTRC	PRLR	ordinary
PHF20	MDM4	ordinary
RGS19	GNA15	ordinary
GNA14	PRKCH	ordinary
SPCS3	RPN2	ordinary
ARHGEF9	AGT	ordinary
PSMB10	CD40	ordinary
TOP3A	FANCG	ordinary
GTF2H2	POLR2D	ordinary
EP300	TNFRSF21	ordinary
AGBL5	TTLL1	ordinary
BCAT1	EGLN3	ordinary
DAGLB	MGLL	ordinary
ATG12	ATG10	ordinary
TRPC1	RASGRF2	ordinary
DYNLL1	NR3C2	ordinary
ELL	GTF2H5	ordinary
TIRAP	IRAK2	ordinary
IRAK4	PELI2	ordinary
PLA2G6	CYP2U1	ordinary
SLC1A2	RIMKLA	ordinary
SNX18	ADRB2	ordinary
RAF1	TRAK1	ordinary
CDK11B	CEP131	ordinary
GPLD1	NEGR1	ordinary
P4HA2	COL5A1	ordinary
TREM2	ZMYM2	ordinary
VAV3	INPP5A	ordinary
TPCN2	LMOD1	ordinary
PPP3R1	YWHAQ	ordinary
SLC45A3	SLC5A1	ordinary
SLC5A1	HK3	ordinary
PI4K2B	REPS2	ordinary
PSMD8	RNF146	ordinary
SMURF2	SMAD1	ordinary
HSPH1	HSPA1B	ordinary
SLC9A1	SLC9A7	ordinary
ORAI2	TMOD2	ordinary
VAV1	INPP5D	ordinary
PARP10	NAMPT	ordinary
VRK2	TMPO	ordinary
PI4K2A	SH3GL1	ordinary
REPS1	MYO10	ordinary
CERS4	DEGS2	ordinary
NBN	TCEA1	ordinary
RELB	NFKB2	ordinary
TTC21B	AKAP5	ordinary
CREBBP	PPARA	ordinary
CHUK	REL	ordinary
VAMP8	PUM1	ordinary
ACTB	COPS7B	ordinary
COPS2	FEM1B	ordinary
PSMD9	ANAPC5	ordinary
SREBF1	SCD	ordinary
DNAJC6	SNX2	ordinary
GABPB1	POLG2	ordinary
BTC	ERBB4	ordinary
GRB2	CSK	ordinary
ADCY1	RAPGEF4	ordinary
PRKAB2	RRAGB	ordinary
SPTLC1	KDSR	ordinary
SYK	PIK3CD	ordinary
NCK1	PAK2	ordinary
NEDD8	BIRC5	ordinary
CH25H	RXRA	ordinary
NCOA2	ACOX1	ordinary
ABCD1	DPM2	ordinary
BIN1	SLC2A8	ordinary
IGF2R	PLIN3	ordinary
PDPK1	RPS6KA3	ordinary
IDH3B	SLC25A11	ordinary
ADHFE1	ALDH5A1	ordinary
ACOT9	BCKDHA	ordinary
PSMB9	TNFSF13B	ordinary
GNG10	ITPKA	ordinary
XRN2	DDX52	ordinary
RPS24	UTP14A	ordinary
DLG4	PPP3CB	ordinary
RHOC	PPP1R12B	ordinary
SLC4A2	SLC12A7	ordinary
PLCH1	ITPKB	ordinary
GNAS	PRKAR2B	ordinary
TAB2	S100B	ordinary
IKBKG	NFKBIE	ordinary
OSBPL8	SACM1L	ordinary
AGFG1	ACTR3	ordinary
NUP160	IPO8	ordinary
PIP5K1C	PIK3R5	ordinary
ARL6IP5	TTLL12	ordinary
PPP3CA	NFATC3	ordinary
TFPT	GPS1	ordinary
RBX1	SPRED2	ordinary
SMAD3	CDKN2B	ordinary
FZD2	PPP2R1A	ordinary
PPP2R1B	RBL2	ordinary
TRIP10	SYT11	ordinary
STXBP1	GAD1	ordinary
CUX1	FGFR4	ordinary
RAB11A	EXOC7	ordinary
PLA2G16	PLA2G4C	ordinary
TNKS2	NNMT	ordinary
HDAC6	MID1IP1	ordinary
AKT1	FOXO1	ordinary
GUCY1A3	PRKG1	ordinary
NCOA6	TXNRD1	ordinary
ACOX1	CAT	ordinary
EIF1AX	RPL22	ordinary
AP2S1	GRIP1	ordinary
COPS3	LRR1	ordinary
GPSM3	C5AR1	ordinary
PAFAH1B2	DYNC1I2	ordinary
PRKAA1	LAMTOR2	ordinary
RRAGC	SLC7A7	ordinary
EHHADH	HSD17B4	ordinary
ACAA1	ACOT8	ordinary
TRPV4	CPLX1	ordinary
PPP3CB	PPP1R1B	ordinary
RPA1	HSPH1	ordinary
FAM20C	MFGE8	ordinary
ARHGEF7	PAK1	ordinary
ALDH4A1	BCAT2	ordinary
FPGS	SHMT1	ordinary
CHD4	KAT6A	ordinary
PML	PTEN	ordinary
PLCB1	DGKE	ordinary
PIK3CA	PICALM	ordinary
SPRED1	RASA2	ordinary
EXOSC7	IMP4	ordinary
RAB18	BICD2	ordinary
PDE3A	GMPR	ordinary
PIK3CG	PACSIN3	ordinary
PLCD3	ITPKC	ordinary
BIRC3	RIPK2	ordinary
ADRA2C	GNG11	ordinary
RIMKLA	FOLH1	ordinary
BBS10	BBIP1	ordinary
IFT122	PDE7B	ordinary
SCN1B	DLG4	ordinary
PAN3	EIF4A1	ordinary
POLD4	RAD51	ordinary
CLTA	AP1S2	ordinary
DNM2	AP2A1	ordinary
B3GALT6	SDC1	ordinary
PSMF1	BUB1B	ordinary
BLMH	THOP1	ordinary
CATSPERG	ITGA1	ordinary
AGPAT1	HDAC6	ordinary
DVL2	TREM2	ordinary
CA13	AQP11	ordinary
ATP6V1E1	PYGM	ordinary
STON2	PIP5K1B	ordinary
ATM	POLK	ordinary
POLD3	RPA3	ordinary
FAM114A2	MAP2K2	ordinary
GNB1	DGKA	ordinary
DCUN1D2	CUL4A	ordinary
AP2A1	ROR2	ordinary
CD3D	ZAP70	ordinary
CAMK2G	EPB41L1	ordinary
CERS5	DEGS1	ordinary
GNA15	DAGLB	ordinary
SYNJ1	SBF2	ordinary
PSMC2	CDC23	ordinary
IL1RAP	BCR	ordinary
GLUD2	CPS1	ordinary
PACSIN2	TGOLN2	ordinary
MAPK11	CBX2	ordinary
RRAGD	EPRS	ordinary
LAMTOR5	CALM2	ordinary
RIPK1	CASP10	ordinary
SLC6A6	BEST1	ordinary
ANO5	SLC6A9	ordinary
AGL	SLC2A6	ordinary
RHOB	PKN2	ordinary
HSD17B12	SRD5A1	ordinary
SLC4A5	SLC22A4	ordinary
CDC42	KIF2C	ordinary
ATP6V0E2	AK8	ordinary
EXOSC6	NOP56	ordinary
UBE2M	FBXW11	ordinary
SOS1	PIK3R1	ordinary
BAG1	HSPA14	ordinary
FRAT1	PPP2R5E	ordinary
CACFD1	CALD1	ordinary
TTF1	TAF1A	ordinary
RPS27	FBL	ordinary
CD3G	CD28	ordinary
MAT1A	EEF2KMT	ordinary
AGPS	ACAA1	ordinary
RYR1	DES	ordinary
LAMTOR4	MAF1	ordinary
ARNTL	BHLHE41	ordinary
SSU72	NABP2	ordinary
MYO18A	GAB1	ordinary
PRKAG2	RHEB	ordinary
NLK	TCF7L2	ordinary
SLC25A6	MB21D1	ordinary
MAPKAPK2	ZFP36	ordinary
PSMB8	OAZ1	ordinary
RIOK3	BYSL	ordinary
RPS8	RRP9	ordinary
PSMC3	TNKS2	ordinary
WTAP	NCBP2	ordinary
AMDHD2	GNPNAT1	ordinary
GNPDA2	GFPT1	ordinary
SUCLG1	ACADL	ordinary
DLST	SUCLG1	ordinary
CHCHD4	TIMM8A	ordinary
MMP2	SCUBE3	ordinary
ATP6V0B	GUK1	ordinary
PYGL	UGP2	ordinary
SLC20A2	SLC9A9	ordinary
SOAT1	ACLY	ordinary
MARC1	IARS	ordinary
SLC3A2	GCLC	ordinary
PLCB2	RASGRP2	ordinary
AASS	GOT2	ordinary
GLUD1	OGDH	ordinary
OSBPL1A	DCTN5	ordinary
GTF2H1	NCBP1	ordinary
TLR2	TIRAP	ordinary
NUP188	ALYREF	ordinary
GNAL	PDE3B	ordinary
GNAO1	ITPR2	ordinary
CBL	TGFBR2	ordinary
GUSB	GLB1	ordinary
GLB1L	GBA	ordinary
NADK2	MCCC2	ordinary
INO80D	COPS6	ordinary
CEPT1	PTDSS2	ordinary
PLD2	PITPNM3	ordinary
FGFR3	FGFR2	ordinary
YWHAB	FAM114A2	ordinary
EPHA2	EFNA3	ordinary
PIK3R6	SGIP1	ordinary
MAML3	GZMB	ordinary
GTF2H5	POLR2I	ordinary
IRAK2	MAP2K6	ordinary
SLC24A1	TRPM7	ordinary
RHOQ	EXOC4	ordinary
SMARCD3	SLC27A1	ordinary
ACTR3	VAMP2	ordinary
DGKQ	LPIN3	ordinary
UBE2D2	TLR3	ordinary
ARF6	FCHO1	ordinary
EGFR	PXN	ordinary
RPS23	NOC4L	ordinary
PDHB	ACAA2	ordinary
FGFR1OP2	ABI1	ordinary
PTDSS2	OSBPL8	ordinary
ADCY6	PDE8A	ordinary
HSP90AA1	CYGB	ordinary
ANK1	CD59	ordinary
PSMB7	ANAPC2	ordinary
TPCN1	VCL	ordinary
FCHO2	AP2M1	ordinary
IL2RB	STAT5B	ordinary
RPS11	DDX49	ordinary
PLCG1	DGKD	ordinary
IFIH1	CASP8	ordinary
IKBKB	CYLD	ordinary
FAM20A	TMEM132A	ordinary
DDB2	XPC	ordinary
PIP4K2A	SH2D2A	ordinary
DEK	H2AFV	ordinary
LCK	TYROBP	ordinary
INPP4A	SYNJ2	ordinary
SLC38A1	SLC38A2	ordinary
TEC	PRKCA	ordinary
HRASLS5	ABHD4	ordinary
PRKCA	STXBP3	ordinary
ARFGAP3	USO1	ordinary
PPA2	SUCLA2	ordinary
ATP2B4	PPP3R1	ordinary
PDK2	DLAT	ordinary
CRLS1	TAZ	ordinary
PSMB1	ANAPC11	ordinary
DCTN1	NR3C1	ordinary
SUCLA2	HADHB	ordinary
DENND1C	RAB8B	ordinary
MAP2K3	MAPKAPK3	ordinary
SOCS1	STAT2	ordinary
RPS15A	RPS7	ordinary
UGP2	PPP1R3C	ordinary
RPS16	IMP3	ordinary
PPFIA1	BCHE	ordinary
NCSTN	DTX2	ordinary
ADAMTS3	COL27A1	ordinary
CHD9	GLIPR1	ordinary
RPS19BP1	SIRT1	ordinary
TRPM4	SLC9A8	ordinary
ITPKB	OCRL	ordinary
CYB5RL	CP	ordinary
SLC40A1	LCN2	ordinary
PDE7B	AK2	ordinary
LPCAT4	PLBD1	ordinary
OSBPL5	PLA2G5	ordinary
MVD	NUS1	ordinary
TULP3	PDE7A	ordinary
MCRS1	RAD23A	ordinary
GDPD5	CHKB	ordinary
PLCB4	SYNJ1	ordinary
DGKZ	LPIN2	ordinary
MAT2A	DPH2	ordinary
NUP58	KPNA3	ordinary
ARL2BP	ADCY9	ordinary
ATP6V1H	SLC25A4	ordinary
CACNB2	ORAI1	ordinary
ZMYM2	SOS1	ordinary
RPS27L	DCAF13	ordinary
LAMTOR1	EIF4EBP1	ordinary
PRKACB	GFRA1	ordinary
STAM	PIP5K1A	ordinary
SH3KBP1	PIK3AP1	ordinary
EFNA1	NGEF	ordinary
TRIM24	WASF3	ordinary
EPHB4	EFNB2	ordinary
MSRB2	MAT2A	ordinary
TMED5	WNT9A	ordinary
RPTOR	ULK1	ordinary
PLD3	PLPP4	ordinary
NRAS	KIAA1549	ordinary
COLGALT1	COL6A2	ordinary
PDGFA	PDGFRA	ordinary
NFYC	HSPA5	ordinary
SCP2	BAAT	ordinary
CRAT	NUDT7	ordinary
PPP2R5C	MARK3	ordinary
MAT2B	INMT	ordinary
CAMKMT	CALM1	ordinary
GMPR2	IMPDH2	ordinary
PRKAB1	TBC1D1	ordinary
TSC1	MTOR	ordinary
CHRM3	GNAQ	ordinary
MAOA	PRDX2	ordinary
PRDX5	TXN2	ordinary
BAG2	HSPA2	ordinary
CCAR2	DNAJB1	ordinary
NPL	MPC1	ordinary
MPC2	PDHB	ordinary
STK11	PRKAA2	ordinary
IRS2	WASF1	ordinary
ARPC3	FZD4	ordinary
TRAPPC1	RAB1B	ordinary
UBA52	RFC1	ordinary
GFPT2	GNPDA1	ordinary
CHRNA1	SLC24A4	ordinary
PPA1	PYGL	ordinary
FZD7	PARD6A	ordinary
VAV2	ITPR3	ordinary
C1D	WDR43	ordinary
ASL	EEF1E1	ordinary
ADPGK	PGM2L1	ordinary
GYS1	GYG1	ordinary
EDC3	LSM5	ordinary
TP63	PERP	ordinary
RYR3	TMOD1	ordinary
PPP2R5D	RAF1	ordinary
HADHA	PLA2G6	ordinary
TAP2	ERAP2	ordinary
HSPA8	AP1S3	ordinary
SEH1L	SNRPD1	ordinary
OTUD7B	TAB3	ordinary
DAPP1	DGKZ	ordinary
WRN	REV3L	ordinary
STAM2	EPS15	ordinary
B3GLCT	CFP	ordinary
ATP6V1F	NME2	ordinary
NOS2	GUCY1B3	ordinary
CDKN1B	MCM6	ordinary
RUNX3	LEF1	ordinary
SLC44A4	CHKA	ordinary
UBE2V1	TAB2	ordinary
ATP6V1C1	AK9	ordinary
PI4KA	PIK3C2A	ordinary
HK1	G6PD	ordinary
PIK3CB	SNX18	ordinary
MLXIPL	ACACB	ordinary
NEURL1B	DLL4	ordinary
MBD3	UBTF	ordinary
KBTBD7	NF1	ordinary
SUCLG2	SLC27A3	ordinary
RAB7A	CAPZA1	ordinary
GLE1	NUP214	ordinary
BMP1	LOXL2	ordinary
MYO5A	EXOC8	ordinary
DHCR7	DHCR24	ordinary
XYLT1	HSPG2	ordinary
ADRA2A	GNG7	ordinary
SUOX	PRDX3	ordinary
MICAL1	GSTP1	ordinary
RPS5	SNU13	ordinary
ADCY5	RAPGEF3	ordinary
PPP1CB	CSNK1D	ordinary
INSR	PPP2R5A	ordinary
MCOLN2	MYH11	ordinary
CSNK1D	GOSR2	ordinary
MDC1	TP53BP1	ordinary
RB1	MCM4	ordinary
GZMH	IGFBP3	ordinary
NUP50	CPSF3	ordinary
RGS1	GNAI2	ordinary
ACTR2	VAMP7	ordinary
SLC11A2	FTL	ordinary
ERCC1	RFC4	ordinary
HELZ2	FHL2	ordinary
NAA30	ARFRP1	ordinary
FGF13	AHCYL2	ordinary
FAAH	CYP2J2	ordinary
PLCB3	PRKCZ	ordinary
DYNC1LI2	PGR	ordinary
ARPC4	VAMP8	ordinary
SPIDR	XRCC2	ordinary
NOD1	MAP2K3	ordinary
MAP2K4	MAPK10	ordinary
COMT	MTR	ordinary
ALG10B	MAGT1	ordinary
INPP5B	ITPK1	ordinary
WDR35	PDE8B	ordinary
ACOT2	GCAT	ordinary
IMPDH1	GMPS	ordinary
MPC1	PC	ordinary
SLC6A9	ANO5	ordinary
SARM1	TLR4	ordinary
GPAT4	GPAT3	ordinary
AGPAT3	PAFAH1B3	ordinary
MPHOSPH6	NOP58	ordinary
ITK	RASGRP1	ordinary
RPS3A	RPS14	ordinary
SUPT4H1	POLR2G	ordinary
SLC38A2	SLC38A1	ordinary
NAGS	ACSM1	ordinary
[truncated: 1,641 more rows]

[truncated: 6 more sheets: LUSC, PRAD, READ, STAD, THCA, UCEC]
