# Supplementary material for: Conserved Control Path in Multilayer Networks
Source: Entropy (Basel). 2022 Jul 15;24(7):979. doi: 10.3390/e24070979 (PMC9324794; doi:10.3390/e24070979)
Supplement: Supplementary file 1 [file entropy-24-00979-s001.zip › Supplementary Data 3.xlsx]

## Sheet: CGC cancer
ABI1
ABL1
ABL2
ACKR3
ACSL3
ACVR1
ACVR2A
AFF1
AFF3
AFF4
AKT1
AKT2
ALK
AMER1
APC
APOBEC3B
AR
ARHGAP26
ARHGEF12
ARID1A
ARID1B
ARID2
ARNT
ASPSCR1
ASXL1
ATF1
ATIC
ATM
ATP1A1
ATP2B3
ATR
ATRX
AXIN1
AXIN2
B2M
BAP1
BARD1
BCL10
BCL11A
BCL11B
BCL2
BCL3
BCL6
BCL7A
BCL9
BCL9L
BCOR
BCORL1
BCR
BIRC3
BLM
BMPR1A
BRAF
BRCA1
BRCA2
BRD3
BRD4
BRIP1
BTG1
BTK
BUB1B
C2orf44
CACNA1D
CALR
CAMTA1
CANT1
CARD11
CARS
CASC5
CASP8
CBFA2T3
CBFB
CBL
CBLB
CBLC
CCDC6
CCNB1IP1
CCND1
CCND2
CCND3
CCNE1
CD274
CD74
CD79A
CD79B
CDC73
CDH1
CDH11
CDK12
CDK4
CDK6
CDKN1B
CDKN2A
CDKN2C
CDX2
CEBPA
CHCHD7
CHD4
CHEK2
CIC
CIITA
CLIP1
CLTC
CLTCL1
CNBP
CNOT3
CNTRL
COL1A1
COL2A1
CREB1
CREB3L1
CREB3L2
CREBBP
CRLF2
CRTC1
CRTC3
CSF3R
CTCF
CTNNB1
CUX1
CXCR4
CYLD
DAXX
DCTN1
DDB2
DDIT3
DDR2
DDX10
DDX3X
DDX5
DDX6
DEK
DICER1
DNAJB1
DNM2
DNMT3A
DROSHA
EBF1
EGFR
EIF3E
EIF4A2
ELF4
ELK4
ELL
EML4
EP300
EPAS1
EPS15
ERBB2
ERBB3
ERBB4
ERC1
ERCC2
ERCC3
ERCC4
ERCC5
ERG
ESR1
ETNK1
ETV1
ETV4
ETV5
ETV6
EWSR1
EXT1
EXT2
EZH2
EZR
FAM46C
FANCA
FANCC
FANCD2
FANCE
FANCF
FANCG
FAS
FAT1
FAT4
FBXO11
FBXW7
FCGR2B
FCRL4
FES
FEV
FGFR1
FGFR1OP
FGFR2
FGFR3
FGFR4
FH
FHIT
FIP1L1
FLCN
FLI1
FLT3
FLT4
FOXA1
FOXL2
FOXO1
FOXO3
FOXO4
FOXP1
FSTL3
FUBP1
FUS
GAS7
GATA1
GATA2
GATA3
GNA11
GNAQ
GNAS
GOLGA5
GOPC
GPC3
GPHN
GRIN2A
H3F3A
H3F3B
HERPUD1
HEY1
HIF1A
HIP1
HIST1H3B
HIST1H4I
HLA-A
HLF
HMGA1
HMGA2
HNF1A
HNRNPA2B1
HOOK3
HOXA11
HOXA13
HOXA9
HOXC11
HOXC13
HOXD11
HOXD13
HRAS
HSP90AA1
HSP90AB1
IDH1
IDH2
IGH
IGK
IGL
IKBKB
IKZF1
IL2
IL21R
IL6ST
IL7R
IRF4
IRS4
ITK
JAK1
JAK2
JAK3
JUN
KAT6A
KAT6B
KCNJ5
KDM5A
KDM5C
KDM6A
KDR
KDSR
KEAP1
KIF5B
KIT
KLF4
KLF6
KLK2
KMT2A
KMT2C
KMT2D
KRAS
KTN1
LASP1
LCK
LEF1
LIFR
LMNA
LMO1
LMO2
LPP
LRIG3
LRP1B
LYL1
LZTR1
MAF
MAFB
MALT1
MAML2
MAP2K1
MAP2K2
MAP2K4
MAP3K1
MAP3K13
MAPK1
MAX
MDM2
MDM4
MECOM
MED12
MEN1
MET
MITF
MKL1
MLF1
MLH1
MLLT1
MLLT10
MLLT11
MLLT3
MLLT4
MLLT6
MN1
MPL
MSH2
MSH6
MSI2
MSN
MTCP1
MTOR
MUC1
MUTYH
MYB
MYC
MYCL
MYCN
MYD88
MYH11
MYH9
MYO5A
MYOD1
NAB2
NBN
NCOA1
NCOA2
NCOA4
NCOR1
NCOR2
NDRG1
NF1
NF2
NFATC2
NFE2L2
NFIB
NFKB2
NFKBIE
NIN
NKX2-1
NONO
NOTCH1
NOTCH2
NPM1
NR4A3
NRAS
NRG1
NSD1
NT5C2
NTRK1
NTRK3
NUMA1
NUP214
NUP98
NUTM1
NUTM2A
NUTM2B
OLIG2
P2RY8
PAFAH1B2
PALB2
PAX3
PAX5
PAX7
PAX8
PBRM1
PBX1
PCM1
PDCD1LG2
PDE4DIP
PDGFB
PDGFRA
PDGFRB
PER1
PHF6
PHOX2B
PICALM
PIK3CA
PIK3CB
PIK3R1
PIM1
PLAG1
PLCG1
PML
PMS2
POLD1
POLE
POLQ
POT1
POU2AF1
POU5F1
PPARG
PPFIBP1
PPM1D
PPP2R1A
PPP6C
PRCC
PRDM1
PRDM16
PREX2
PRF1
PRKACA
PRKAR1A
PRRX1
PSIP1
PTCH1
PTEN
PTK6
PTPN11
PTPN13
PTPRB
PTPRC
PTPRK
PTPRT
QKI
RABEP1
RAC1
RAD21
RAD51B
RAF1
RANBP2
RAP1GDS1
RARA
RB1
RBM10
RBM15
RECQL4
REL
RET
RHOA
RHOH
RMI2
RNF213
RNF43
ROS1
RPL10
RPL22
RPL5
RPN1
RSPO2
RSPO3
RUNX1
RUNX1T1
SALL4
SBDS
SDC4
SDHA
SDHAF2
SDHB
SDHC
SDHD
SET
SETBP1
SETD2
SF3B1
SFPQ
SFRP4
SH2B3
SH3GL1
SLC34A2
SLC45A3
SMAD2
SMAD3
SMAD4
SMARCA4
SMARCB1
SMARCD1
SMARCE1
SMO
SND1
SOCS1
SOX2
SPEN
SPOP
SRC
SRSF2
SRSF3
SS18
SS18L1
SSX1
SSX2
SSX4
STAG2
STAT3
STAT5B
STAT6
STIL
STK11
STRN
SUFU
SUZ12
SYK
TAF15
TAL1
TAL2
TBL1XR1
TBX3
TCEA1
TCF12
TCF3
TCF7L2
TCL1A
TERT
TET1
TET2
TFE3
TFEB
TFG
TGFBR2
TLX1
TLX3
TMEM127
TMPRSS2
TNFAIP3
TNFRSF14
TNFRSF17
TOP1
TP53
TP63
TPM3
TPM4
TPR
TRA
TRAF7
TRB
TRD
TRIM24
TRIM27
TRIM33
TRIP11
TRRAP
TSC1
TSC2
TSHR
U2AF1
UBR5
USP6
USP8
VHL
WAS
WHSC1
WHSC1L1
WIF1
WRN
WT1
WWTR1
XPA
XPC
XPO1
YWHAE
ZBTB16
ZFHX3
ZNF198
ZNF278
ZNF331
ZNF384
ZNF521
ZRSR2

## Sheet: GWAS disease
CHI3L1
COG6
HYKK
CRPP1 - CRP
IL1RAP
CHRNA3
CASC8
COLCA1, COLCA2
SMAD7
LOC105376400
LOC105375712 - EIF3H
JAZF1
CDC123 - CAMK1D
LOC105369831 - LOC105369832
THADA
ADAMTS9-AS2
RNF146
CCDC60
SLC2A9
LOC105371664
IL1RL1 - IL18R1
IL12A-AS1
LPP
TAGAP, LOC105378083
MSMB - RPL23AP61
KLK3 - KLK2
LOC105369366 - LOC105369367
SLC22A3
LMTK2
CXorf67 - NUDT11
EHBP1
CTBP2
CELSR2 - PSRC1
LCRB
BCL11A
RNF212
RNF212, LOC100421802
HERC2
ITGAM
PHRF1
PXK
LOC100506023, TNFSF4
FAM167A - BLK
ITGAX
BANK1
IKZF4, LOC105369781
GALNT2
BCL7B - TBL2
TRIB1 - LOC105375746
CILP2 - PBX4
DOCK7 - ATG4C
MLXIPL
UQCC1
LOC105377656 - LOC339978
TRR-TCG1-1 - LINC00925
ZBTB38
HOMER1
COL11A2
GCKR
DOCK7
DPP6
LOC107983992 - LOC100422334
LOC102723649 - LOC442263
LOC105369887 - LOC728084
LOC105370627
LOC105374875
LOC105370805 - SLC24A5
TYR, LOC107984363
SLC45A2
FCER1A - OR10J3
OR10J1
LOC101927587
ZNF536
LOC100128596 - LOC107986849
STARP1 - HNRNPA3P5
GDAP1
RNU6-1200P - LOC100421670
MYRIP
LINC00374 - RNY4P29
CST9LP2 - CST9
TMEM196, LOC107986774
HACE1
CDCA7L - LOC102724143
NXPE2
LOC105370234 - LINC00376
ADGRV1
RPL26P32
NRG1
LOC107986409
LRRC63
PCAT29 - LOC107984788
CNTN5
HSPA12A
TBC1D7-LOC100130357 - LOC105374936
LOC105378769 - LINC00466
LOC105375896
IFT43 - GPATCH2L
PREX1
MEF2C
LOC105371604
LOC105374636
LOC100130209 - LOC100507201
LOC105369715
OSBPL9P3 - LOC105369427
LOC728755
ZMAT4
RBMS3 - LOC101927995
LOC101927366, TMEFF2
COL1A1
LOC105377703, LOC101927835
LOC105369839 - RPL31P48
LOC101927273 - LOC107985164
ABCC4
CTDSPL
SLC10A2 - LOC105370338
PKHD1
HAPLN1
LOC105374141 - LARP7P4
RASL11A - RNU6-70P
LOC107985947
LOC105377558 - AGA
DCLK1
LOC105378851
NUMB
ABI2
LRRC18, WDFY4
DNAH5
LOC107985520 - LOC105378839
LOC105377262
N6AMT1
LOC105378178
CDH4
SLIT2
LOC107986541 - SPACA1
OBFC1
LRIT3 - KRT19P3
RYR2
COL1A2
VN1R23P - RAC1P5
SNRPN
ADARB1
C15orf32 - LINC00930
SDK1 - CYP3A54P
EEF1DP6 - LOC284661
NEGR1
LOC105379119 - TMEM232
ITPR2
TRAF1
IL23R - RNU4ATAC4P; IL23R; IL23R; IL23R - RNU4ATAC4P; IL23R; C1orf141; IL23R - RNU4ATAC4P; C1orf141; IL23R; IL23R; IL23R; IL23R; IL23R - RNU4ATAC4P; IL23R; IL23R; IL23R
LOC107986647 - LOC105378010
HMGA2
LOXL1, LOXL1-AS1
ELMO1
PDE4D
IL2RA
IL7R
CLEC16A
RPL5, FAM69A
BRINP1
GSDMB
FTO
BTBD9
MTHFD1L
LOC646736 - LOC105373915
MEIS1
MAP2K5
ABCG8
CASC8, CCAT2
PITX2 - MIR297
HNF1B
CASC17
IL2 - IL21
PALB2
GLTSCR1L
LAMP3
RNPEPL1
CDC25B
CDKN2B-AS1 - DMRTA1
FMN2
SEZ6L
CDH13
BSN
IRGM
LINC01475
LOC100996324 - PTPN2
HLA-DQB1 - MTCO3P1
LOC105373223 - LOC107983951
NR2F2-AS1
RPS14P10 - RPS15AP22
IL2RB - C1QTNF6
YRDCP3 - LINC00323
ANAPC4
RPS26 - ERBB3
NAA25
CLEC2D - LOC105369652
ADAD1
CDKAL1
LOC105377097 - LOC105377098
TSPAN8 - LOC105369831
SLC11A2, HIGD1C
LOC105371660 - LOC107985457
SMIM3 - IRGM
ERBB3
CD226
FGFR2
CASC16
LOC101928448 - LOC105378979
CASC8, CASC21
LSP1
LOC105373874, LOC101928278
DGKH
AIM1
LOC101927558
IMPA2
ATG16L1
ZNF365 - ALDH7A1P4
PRNCR1 - LOC105375752
RPL14P5 - LOC100418703
LOC105374736 - LOC105374737
DOCK1 - NPS
KCNS3 - LOC105373451
RNU1-35P - LOC107986978
ZFP64, LOC105372664
SUSD1
HHEX - EXOC6
LOC102724740
CTNNA3
LOC105378525
DLG2
STAP1
RPL9P21 - EIF2AP4
NOS1AP, LOC105371475
SEMA5A
CFH
HNF1A
LOC105375723 - TNFRSF11B
LRP5
GAB2
RNU2-47P - TYRP1
PIGU
IRF4
IL6R
TBC1D3J - LOC105371749
NBAT1, CASC15
PACERR - PLA2G4A
LPA
GGT1
LOC342784 - LOC105372155
RNU4-17P - LOC342784
LOC101060363 - LOC105376856
LOC101929163
CCDC170
COLEC10
LOC105370177
LEPR - RN7SL854P
C12orf42
PARD3B
EXOC2
LOC107986528, CCDC170
FABP3P2 - LOC105370177
BCO2
ABCB11
NUBPL
CERKL
SLCO3A1
CELF4
NRG3
CACNA1C
G6PC2
RPS2P1 - ASIP; RPS2P1 - ASIP
TPCN2
SPATA2
PVT1
LACC1
LOC285626 - LOC285627
FGFR1OP
STAT3
RN7SKP211 - PRDM1
CYP2C8
LOC101929163, C6orf10
SLC30A8, LOC105375716
LINC00558 - LINC00458
ICAM1
LOC105372616 - LOC105372617
LOC107986666
MOB3B
LOC105376453 - MIR1254-2
PTPRD
LOC105372221 - LOC105372224
ZNF804A
LOC105376603 - LOC401677
SHISA9
TNFAIP3
WDFY4
LOC105374595 - RPL7P13
LOC105377445 - LOC107986315
LOC100506974
GRM7 - LOC101927394
LOC729409 - LYZ; YEATS4 - LOC105369822; YEATS4
SP140
GRAMD1B
ACOXL
PRKD2
FCER1A
RAD50, LOC101927761
STAT4
BLK
CERS6
CST2 - CST5
AP4B1-AS1, PTPN22
ITLN1
AIMP1P2 - TNFSF18
MROH3P - KIF21B
C7orf72 - IKZF1
LOC105375746
HNRNPA1P41 - JAK2
LOC105376491 - CUL2
C11orf30 - LOC101928813
LOC105369735
ZPBP2 - GSDMB
LOC101927745
LOC105377139 - LOC107983952
IL23R
MST1
C5orf56
TNFSF15
LINC01475 - NKX2-3
NOD2
STX4
CYP2C9
PALLD
LPL - LOC105379311
HERPUD1 - CETP
CRP - RPL27P2
APOE
TOMM40
TCF7L2
FHDC1
APOC1 - APOC1P1
PPARG
HCN1
LINC01104
PHTF1 - RSBN1
IGF2-AS, INS-IGF2, IGF2
LOC400867
SLC35F4
TDRD9
LOC392145 - RPL32P17
LOC105376364 - LOC105376365
INPP5D - ATG16L1
SLC22A5 - C5orf56
HLA-DRB1 - LOC107986589
KIAA1109
CLEC2D
FSTL4
ANXA5 - TMEM155
LOC107986589, HLA-DQA1
LOC105373528 - GPR45
INS-IGF2, IGF2
MIA3
HLA-DRA - HLA-DRB9
SNTG1
RHBDD1
NID2
RN7SL792P - TVP23C-CDRT4
RPS17P12 - LOC442727
ZC3H12C
WRN
KCNB2
LOC647132 - BRINP3
LOC107985988
PDE4B
LOC101929321
NNMT - LOC101928940
LOC105376623 - EHF
RNA5SP169 - LOC100996286
LOC101928354
PPP2R2B
LOC100287944
TENM4
PPM1E
NCAPD3
TARBP1
ST13P9 - RNU6-400P
DIRAS2 - OR7E109P
LOC105373633 - THSD7B
LOC107985456 - LOC647132
TMEM248P1 - LOC101927109
RPL7AP57 - FAT3
UTP20
LOC105375340
LOC105374754, LOC101927285
GRIK1
FBN1
MCF2L - F7
LOC105371462
LOC105369165 - RNU6-997P
LOC105375732 - MRPS36P3
LOC107986436 - LOC100652833
ATP8A2P1 - RN7SL314P
LOC642975 - OR9G1
LOC105370655 - LOC107987207
MIR100HG - RNU4ATAC10P
LDHAL6CP - RSL24D1P5
MEAF6
LINC01182, LOC101929048
LOC729200 - TAB2
TAB2
MIR8062 - RN7SL547P
MDGA2
CPVL
LOC105370253 - ZDHHC20P4
PRDM5
ARL2BPP4 - LOC107986449
ERC2 - CCDC66
PHACTR1
KCNH8
LOC107985194
YBX1P5 - ZNF366
LOC105369512
LOC105377814 - LINC01048
CDH2 - ARIH2P1
LOC152225 - LOC101929411
FRMD4B
TAPBPL
LOC105376360, LOC101927880
LOC100507377
RN7SKP190 - LOC100419639
CTNNBL1
RBMS3
LOC101928135
LOC105376214
SYNE1
TGFBR2
VPS37A
GPC6
CNTNAP5
LOC105371544 - LOC107985014
TNR, LOC105371623
SLC9A9
EXOC4
LOC284825
MGAT4D
LOC107987087 - RASEF
ACKR1 - MPTX1
UNC13C
MKI67 - LINC01163
LOC105379160
LOC105377885
RNA5SP318 - PCDH15
LOC107986792
RNY3P9 - LINC00598
RN7SL618P - ZNF646P1
DRD2
CADM3
LOC105375149
LOC105370526, HIF1A
POLR2A
OR10J6P - CRPP1
IL1F10
LOC105378874 - LOC107985096
LINC00624
WDPCP
DYSF - LOC107985896
CTNNA2
RN7SL251P - RPSAP22
RPS29P8 - EPC2
RN7SKP61 - MRPS17P3
DOCK2
LOC105375015
KHDRBS2
RNU2-8P - SLC25A5P7
TARID
SASH1
RPL9P19 - GAPDHP68
LOC105375904, FLJ39080
FAM49B
IL6RP1 - LOC105376142
SLC25A6P5 - LOC107987108
CACNB2
LOC107984222 - MTND5P17
KCNQ1
PAFAH1B2
KIRREL3, LOC105369559
EPS8
PDZRN4
IFT81 - ATP2A2
LOC101929974
LINC00424 - LOC105370108
SACS
STARD9
DUT
BCO1
LOC107985080
C17orf62 - LOC105371941
OSBPL1A
LOC105372047 - RNU6-857P
ANGPTL6
CNTN4
CAMK4
GPATCH2L
LOC105377882
CCL20 - TDGF1P2
ZPR1
LOC101929011 - BUD13
LPL
SIK3
NOTCH2
DCD - VDAC1P5
LOC107986598
SYN2 - GSTM5P1
IGF2BP2
KCNJ11
SPTBN1
ESR1
ANK3
C15orf53 - LOC105370776
LMAN2L - CNNM4
GARNL3
LOC107984773 - LOC107984760
CMTM8
PRSS3 - UBE2R2
ZNF385D
NPAS3
LOC102724845
LOC105376988
LINC01307 - LOC105378872
SVEP1
SIAE
LOC101929560 - ARNT2
THOC1 - COLEC12
LOC100130207
ZMIZ1
ZGPAT
LOC107985484 - RPL23AP12
TNFSF15 - LOC645266
IFIH1
CAPSL
FUT2, LOC105447645
WHAMMP2 - LOC100996670
OCA2
CDK10
HCP5
SCG5 - GREM1
LOC105375015 - HLA-B
UQCRC2P1
ATXN2
RELN
LOC285232 - LINC00506
NUDT11 - LINC01496
PCAT2, PRNCR1
CASC8 - LOC105375754
APOB - TDRD15
TPI1P2 - CYCSP20
MSH5-SAPCD1, MSH5
NTNG2
LOC101926960 - GHR
LOC100421257 - LOC105372188
NEGR1-IT1, NEGR1
IRF5 - TNPO3
ABCA1
LOC101928635, LIPC
LOC105372112
BUD13
APOB
MC1R
LOC105375376 - PCLO
LOC102724542
GALNT13
GNG4
LOC105370027
MIR548AP - LOC105370952
KCNAB1
LOC107986562 - LOC107986563
LINC00681 - LOC105379289
RPS27AP16 - LOC105371301
TNFRSF11A - RPL17P44
LDLR
BSND - PCSK9
LOC101928635
SLCO1B1
LOC107985518 - LOC107985519
LOC107986272 - SEC63P2
PON1
LIPC, LOC101928694
LOC105373451 - LOC105373454
LOC100422639 - LOC107986260
CNTNAP2
NELL1
LINC00841 - CXCL12
SMAD3
CASC11
TP63 - P3H2
MMEL1
CDK6
CCL21 - FAM205A
KIF5A
CD40
LOC399716
AGBL1
LOC100131939 - PTGS2
DRAXIN - AGTRAP
RNU6-63P - LNX2
ACSM1
LOC100129661 - RPL7L1P11
CHKB-CPT1B
PLCL1
LOC107984827 - GLG1
NXPH1
LOC401478
LOC105370338 - LOC105370339
GAD1 - GORASP2
LINC00284 - LOC105370183
METTL6
LINC01428
ARHGAP26
LPAR3
BACH2
GLIS3
RASGRP1
UBASH3A
LOC284930 - LOC107985536
LOC105374641 - LOC105374642
HLA-DRB9 - HLA-DRB5
LOC105372877 - IL10
NDUFB2P1 - LRAT
PVRL2
ABCG2
SLC17A3
RPL41P1 - LINC01432
LINC01432
LOC105373240 - LOC100129144
PADI6
LOC100421842 - LOC105373143
BAG6, APOM
CLPTM1L
TERT
LOC105374329 - NCOA1
CTSH
C1QTNF6
LOC105371082
CPN1 - TPM4P1
C12orf43
JMJD1C
LINC01363
ADAMTS13
PNPLA3
NBPF3 - ALPL
GPLD1
RHPN2
FGFR3P3 - CASC20
CDH1
LOC107984676 - MIR5580
CTLA4 - LOC101927840
RPL32P23 - RBM17
BOLL
LOC105375840 - RN7SL250P
RP1
CDKN2B-AS1
C20orf202 - RAD21L1
CSMD1
TRIM42 - RPL23AP41
ADAMTSL1
LOC101927709 - LOC107985816
TENM3
LOC102724145 - LOC100507461
LOC105373414 - LOC105373416
LOC105377171
TNIK
LINC01183
LOC105373968 - LOC102723825
TRAF3
EIF4EBP2P3 - LOC105377910
ANKRD31 - HMGCR
ZNF285B
FUNDC1
TMEM165, CLOCK
TMEM178A - THUMPD2
LOC105370603 - RNU6-976P
CD33
KIF1B
GAK
SNRPGP16 - MTNR1B
LOC101929406 - LOC105378617
ETV3 - LOC107985211
RGL1
LOC105373164 - LOC105373165
LINC01317
LOC101927967
KIAA2012
FSTL4 - WSPAR
LOC101928036
RPS26P6 - YWHAZ
LOC105375971 - PTPRD
LOC105376354
ST13P11 - CWC15
KIRREL3
MYRFL
PAWR
PDX1-AS1
FAM155A - LIG4
LOC102725045, LOC101927062
LOC105371002 - FAM149B1P1
RBFOX1
LOC105371309 - LOC729217
PKD1L3
PKD1L2
ATP8B1
RPS3AP1 - LINC00320
TMEM57
ABCG8, ABCG5
ZNF510
LOC102724389
PARK2
FADS1
ANKRD30A
ATP2B2
IL20RB - RNA5SP142
FGF12
RNU6-1325P - LOC105377248
ADH5P4 - LOC105377838
RNU4-7P - IYD
LOC107986837 - PPP1R3A
LOC102723639
GPC5, LOC105370315
SV2B
LOC105373352 - TMEM18
LOC100533736 - PRKRIRP9
SH2B1
MTCH2
KCTD15 - RN7SL150P
LOC105378797
STK33
CASC20 - LOC105372516
MEX3B - LINC01583
LOC101928271 - APOB
APOE - APOC1
FADS2
OR4A46P - OR4A40P
NUTF2
DNAH11, LOC105375183
BAZ1B
ZNF101
HMGCR
CETP
NR1H3
METTL16 - RN7SL33P
CR1L
AR
LOC102724253 - LOC107983968
RPL12P33 - HNF1A-AS1
GTF3AP5 - AGMO
MTNR1B - RPL26P31
PANK1
DPEP3
SMARCA4 - LDLR
TIMD4 - HAVCR1
LOC102724968
TTC39B
HNF4A
PCIF1
RAB11B - MARCH2
XKR6
CELSR2
SUGP1
KCTD10
DSCAML1, LOC105369515
RAB38
LOC100129527 - LOC105375897
LINC-ROR - BOD1L2
PCSK5
AXDND1
SGCD
NCKAP5
LEKR1
GAPDHP56 - LOC105377422
NLRP11
C1GALT1
LOC105377262 - LOC100996585
LOC105374945 - RPL6P17
C16orf47
MET
LOC102725148 - LOC105372189
ELOF1 - ACP5
BICD1
FOXO3
SVIL
MXI1
KCNIP1
UGT1A
NUBPL - LOC105370439
IGF2R
CPAMD8
LOC105374116, SRPRB
LOC100419079 - LOC105370529
LOC105377989
ARHGEF3
WDR66
RPL35AP35 - RNU4-34P
TMPRSS6
LRRC16A
TF
STK39
LOC105370315, GPC5
HFE
KLHL13
TFP1, TF
VN1R13P - VN1R11P
BTN1A1, LOC107986583
SLC17A1
LOC105369166
LOC107986581
GHR
LRRC16A - SCGN
SOD2
LOC105375242 - LINC01450
ARSB
LOC105372185 - LOC100421257
LOC105373519 - LOC728815
WHSC1L2P - SOST
DACH2 - KLHL4
CKAP5
LOC105377045 - MRPS31P1
SP7
PCDH11X
LOC105369304 - SAMSN1
CCDC170, LOC107986528
LOC344382
C17orf53
VTCN1
LUZP2
RNF186 - LOC105376823
LOC107984526
LOC105369818, IL26
LOC107987087
ZNRD1
NAALADL2
ZFHX3
LOC105369746
DISC1, TSNAX-DISC1
LOC100379224
LCE3E - LCE3D
LOC107986469, IL12B
LOC105369608 - LOC105369611
PRNP
LOC105375915 - RPL3P9
ADIPOQ-AS1, ADIPOQ
LOC105377732
PSORS1C3 - HCG27
RPL3P2 - WASF5P
UBLCP1 - LOC105377683
TNIP1 - ANXA6
IL13
STAT2
TSC1
MTNR1B
GCK - YKT6
LOC105375444
PIGCP2 - LOC105375444
LAMB1
ST8SIA6
IL15 - INPP4B
LOC105373833 - SPATS2L
NCOA3
DGKB
LOC105378522
PRMT3 - LOC105376584
LOC105378068 - RNU7-152P
LMBRD2
LOC105376395 - PRPF38AP1
MAML2
LINGO1
GPR12 - FGFR1OP2P1
SLC24A2
TNRC6B
LOC105372321 - LINC00664
PKP1
LOC100420304 - PLEKHG1
EPHX2
ANO2
CALCOCO1
LOC101927284
SDK2
LOC107985174
GRM7
FAM174A - RN7SKP62
TNFRSF21
LOC105369739 - LOC100420897
RAN - ADGRD1
LINC01500
RPS9P4
SMOX - LINC01433
RAD23BLP - USP25
RET
KRT18P13 - FOXE1
PTCSC3 - RN7SKP21
IL1RL1
LOC102725082
TMED10P2 - LINC01565
SH2B3
IRF1 - IL5
WDR36
TNXB
MRAS
LINC00310 - LOC105372791
WDR12
SMARCA4
PKD1L2 - BCO1
LOC102724339
MPZL2 - CD3E
LOC101928219
CCDC170 - ESR1
ADAMTS18
TGFBR3
TRHR
LOC105369896 - LOC105369900
KSR2
PKNOX1
LOC105376681 - LOC105376682
GRIA1
LINC00824 - LINC00977
VKORC1 - BCKDK
LOC105377462
LOC107985450 - NOS1AP
LOC105371475, NOS1AP
CNOT1
CEP85L
RNF207
LOC105375567 - KCNH2
LITAF
SCN5A
LIG3
NR3C2
GRIK2
PCSK2
LOC105373156 - MIR4770
SLC14A2
MIR548AG1 - LOC105377249
LOC101927038 - LOC100129078
RNU6-1252P - USP46
RAP1GDS1
ZCCHC16
IRF6 - DIEXF
CYP4F2
RNU2-14P - LOC100128233
SEZ6L2
GS1-259H13.2
SGCD, LOC105377673
MRPL50P1 - RPL21P36
IFI27L1
LOC643997 - LOC107985961
PFN1P10, NBPF3
PRICKLE2-AS1
INSL6, JAK2
CUBN
TCN1
BTNL2, LOC101929163
LPA; LPA; LPAL2; SLC22A3
LOC101928392 - CDH13
ATP1B1
RPL18AP7 - SCN5A
SLC35F1 - LOC644303
CALM2P1 - LOC105371884
NOS1AP
EMBP1
RAD51B
PPARGC1B
GRM5
LOC105378250 - LOC107984525
PAPOLA - RN7SKP108
DBNDD1
PRDM15
CPNE7 - DPEP1
HLA-DPB1
CELF4 - LOC107985118
CATSPER4
LCORL
PRKG2 - RNU5A-2P
NPR3 - LOC340113
HIST1H2APS3
HLA-S - LOC101929072
CYCSP55 - HMGA1
ADGRG6
GNA12
DLEU1 - LOC107984568
TMED10
ADAMTSL3
HHIP
CHCHD7 - SDR16C5
RN7SKP114 - DCAF12
LRP1B
HECTD4
RPL35P2 - RPS10-NUDT3
RNA5SP56 - PSMC1P12
PLAG1
EFEMP1
ATP2B1
C1orf132 - CD34
LOC105377979
TGFB2 - LOC105372924
LOC105377276 - EREG
TANGO6 - HAS3
LOC105372482, ZNF544
LOC105373012 - LOC441996
LOC105373595
LOC101929378
NAPRT
LOC107984351 - EIF3M
LOC101927437, CLYBL
MTA3
OTOL1 - LOC107986048
DMRT2
LOC105374957 - TRQ-CTG1-3
MBOAT1
MEIS2
LOC643542, LOC105372173
ZNF805
LOC105378785
LOC105378786, LOC105378787
LOC105379388 - ZMAT4
PSMA7P - LOC105376161
SPATA13
NOS1
FAM189A1 - LOC101927519
IL16
FAM3C
DOCK10 - NYAP2
RPL23AP43 - LOC105377021
LOC105374295 - XXYLT1
ADAMTS2
LOC105377891 - MAP3K7
LOC107986901 - TRPS1
SULF2
AK8
CFAP221
MOBP
MAP1B
UNC5B
MAN2A2
LOC105370982
ASTN2
CSMD2
DNM1
PPM1F - TOP3B
CFAP43
ITGAE
NT5DC3
LOC100507443, CRYGC
MMP24
ITGA11
MYT1L
REEP5
TLL2
CREB5
ATP2C2
NPM1P51 - TFEB
SUPT3H
RPS15AP14 - LOC105373752
XYLB
BARD1
TRA
LOC101928161, NCKAP5
LOC105369710
DPP10 - LOC105373576
FHIT
FOXP1
NUTF2P4 - LINC01356
LOC107986921 - LPL
LOC101926926 - LOC105375899
LOC105369474 - GUCY1A2
ZNF423
LOC105376774 - MIR4719
LOC105375610
LOC101927450 - CHCHD2P9
STK32B
LOC101929224 - CAMSAP2
SFRP2
FTH1P5 - LOC100422449
LOC105375451
NAV2
MSNP1 - RNU4-43P
UGT1A10, UGT1A4, UGT1A8, UGT1A9, UGT1A5, UGT1A3, UGT1A, UGT1A6, UGT1A7, UGT1A1
SLC22A18
LOC100419917 - RNU2-63P
HIST1H1T - HIST1H2BC
ANKRD50 - FAT4
SEMA3C - LOC100420647
ARHGEF7
LOC105378763 - LOC101926964
LOC107985902
KIAA1211L
ITIH1
LOC102724419
LOC339978 - KIT
MCTP1
LOC105379365 - RPL10AP3
GFI1B
CTSF
LOC107984734 - RNU6-745P
LOC101927207 - NGFR
ATP8B3
MTHFR
CNNM2
PLCD3
MECOM, LOC105374205
PRDM8 - FGF5
C10orf107
CSK
LOC102724596
MSRA
ZNF831
CASZ1
MECOM
CYP17A1
PLEKHA7
LOC107984437 - LOC102723639
CPLX3 - ULK3
SLCO1B3 - SLCO1B7
LINC01317; LOC105374456; LINC01317; LOC105374456; LINC01317; LOC105374456; LINC01317
UGT1A5, UGT1A9, UGT1A6, UGT1A8, UGT1A10, UGT1A4, UGT1A7, UGT1A, UGT1A3
TKTL1
PRKCQ
TH - ASCL2
PTPN2
LOC105374540
CENPW
SKAP2
RPL39P23 - COBL
RNLS, LOC101929727
CD69
ZFP36L1 - MAGOH3P
LINC01550 - LOC107984706
IL27 - NUPR1
CTRB2 - CTRB1
CCR7 - SMARCE1
SIRPG
LOC105372988, HORMAD2
GAB3
PGM1
LOC100506457
GP2 - UMOD
DNAH2
HLA-DRA
UMOD - PDILT
SHROOM3
SPATA5L1
LIN28B
LOC105376201 - MIR8081
LOC100422315 - LINC00577
DDC
OR51V1 - HBB
MYH3
MCM8
BRSK1
UIMC1
SYCP2L
RNU6-374P - MSNP1
KITLG
UCK2
CENPE - LOC101929448
LOC107986455 - SPRY4
BAK1
ITGA9
LOC105374721 - LOC105374723
CD36
HK1
DPY19L3
NONOP2
RNU6-474P - CTLA4
ST6GAL1
LOC105373999 - OR5K4
ALG10B - CPNE8
MCTP2
LOC105375999 - LOC105369289
MTHFD2P1 - HNRNPKP4
RNU7-6P - LOC105372664
LOC105369688 - PDE3A
LOC105373644 - LOC105373645
CRACR2A
PHF19
PDZK1 - CD160
SLC16A9
SLC22A11
SLC22A11 - SLC22A12
SPC25 - G6PC2
GCK, LOC105375257
LOC105376639 - LOC101928591
ADARB2
LOC105375246 - LOC107986787
IQCJ-SCHIP1, SCHIP1
LOC107987054, LINC01239
LOC100419692 - LOC105375994
LOC105373654, ARHGAP15
TRIM24
SLC2A10 - RN7SKP33
MGAT1
LOC105374972 - LOC105374974
BLOC1S3
ITGA8
APOA5 - APOA4
LOC107986294 - LOC105377301
UBE3C - DNAJB6
LOC107986393 - LOC105377724
HEMGN
SDK1
LHX5-AS1 - LOC105369990
MFSD2B
METTL1
RPL13P2 - CD40
CD58
ASAP1
HS3ST2 - USP31
HLA-F-AS1, HLA-F
TNFRSF1A
LOC105371388 - LOC105371389
CD6
MPHOSPH9
CLDN14, LOC105369301
TFAP2B
LOC105379235
LOC102723886, LOC107985272
LOC105376498 - ZNF248
EML6
ITPR3
LOC105377388 - LOC105377389
ANO3
FBN2
RARB
RFTN1, OXNAD1
PALD1 - PRF1
MACROD2
LOC105375024
RN7SKP178 - INO80D
NRXN3
CDH12
OVCH2
BCDIN3D - RPL35AP28
TBCE
TRT-AGT6-1 - TRI-AAT5-4
VRK2
SLCO6A1 - LINC00492
TRV-CAC2-1 - TRI-AAT10-1
LOC105376248 - LOC105376249
LOC107984405 - NRGN
TCF4
LEPR
CCDC26
PHLDB1
RTEL1, RTEL1-TNFRSF6B
MTAP
AFG3L1P
PLA2G6
LOC107987026
NOTCH4
RN7SKP270 - PTBP2
LOC101928882
DIS3L2
LOC100421303, DLG2
MKL1
PECR
ERAP1
LOC100287335 - PCNX
CLCN4 - MID1
HELLS - CTBP2P2
NPM1P17 - SOX14
CYP2C19
HCG22 - C6orf15
SLC35F1
GRID1
WWOX
TMEM232
SMG6
LOC101928270 - PALMD
PRDM6 - SUMO1P5
HMGA2 - MIR6074
LOC100506393
LOXL1
LOC102723576
LOC107984724 - ALDH1A2
BNC2 - LOC105375983
PSCA
LOC102724913
LOC107985829 - FIGN
IFNL4
HLA-A - HCG4P4
SUMO2P1 - MOG
IKZF1
ARID5B
CEBPE - SLC7A8
ALDH2
ADH1B
ZFP57 - ZDHHC20P1
RN7SL44P - S100A6
LOC285696
RNU6-183P - SCAMP1-AS1
EFNA5
MAGI2
MAL2
PRUNE2
LOC107987022 - RPS20P25
LOC107984408 - LOC105369566
RPL13AP21 - SLC38A1
RAB11AP2 - GGTA2P
LOC105370299 - TXNL1P1
LOC101927598
MROH8
RPN2
ZBP1
FDPSP6 - KRT18P2
AK9
LOC105377563 - LOC105377564
CHCHD2P9 - LOC102723932
WFS1
LINC01339
MIR4457 - CLPTM1L
MAP1LC3B2
LOC102723724
ZNF230
KCNE4
ST6GALNAC3
KCNMB2, KCNMB2-AS1
LOC100996886
GCSAML, GCSAML-AS1
CCND2 - C12orf5
LOC105371961 - METTL4
PARD3
TGM5 - ATP5HP1
ACTA2
GKN2 - GKN1
UNC13A
LOC107987057
LOC641378 - LOC107985665
RPL7P40 - PSMC1P8
CLU
RNU6-560P - LOC107984426
CLU; CLU; CLU
CR1; CR1
SOX6
ABO - LCN1P2
PAPSS2
LOC105371960 - LOC105371959
IFNL4 - MSRB1P1
ADGRD1
LOC107984589 - VDAC1P12
PAX2
SAMD5 - SASH1
EEFSEC
CASC21, CASC8
DPF1 - PPP1R14A
LOC105378889 - PRMT6
SOX5
RXRG
TGFBRAP1
C9orf72
LOC105369453 - LOC105369454
LOC101928201 - MTND6P12
LOC107987047 - LOC100130801
RPS20P23 - RNU4-83P
TRH-GTG1-9 - ZDHHC21
MIR100HG
FTH1P21 - LOC102724785
GLRX3 - LOC100419870
GNG12-AS1, WLS
LOC105375236 - STARD3NL
C7orf76, LOC105375411
DCDC5 - DCDC1
FOXL1 - LOC101928614
MGC57346-CRHR1
MEPE - HSP90AB3P
HDAC5
LOC107986529, ESR1
TNFRSF11A
MEF2C-AS1
LOC101929359 - TAS2R1
LOC105375411
LOC102724957
ARHGAP1 - ZNF408
LOC283440 - RPL23AP14
SPPL3
CCND3
BPIFC - FBXO7
TFR2
FIG4
PTPN11
AK3 - ECM1P1
LRRC3C - GSDMA
DNM3
TPM1
ODF3 - BET1L
TMCC2
SIRPA - LOC727993
EHD3
DOK6 - CD226
RNF145
NFE2
SPTA1
LOC105378010 - MYB
ZAN
PRKCE
PRKAG2
ATXN2 - BRAP
LOC105372666 - LOC105372668
TFRC - LINC00885
SLC17A1 - SLC17A3
LOC645434 - LOC105378023
RCL1
ITFG3
BTNL2 - HLA-DRA
C2
LOC105370003
LOC101927115
DUSP23 - LOC105371464
LINC01512 - LOC101929705
ZFPM2
LOC105375957 - KCNV2
LINC01512
LINC01010, LOC101928231
SLC22A12
SF1
MAP4K2
PYGM
MEPE
LOC101929034 - IRX4
MDFI - NPM1P51
FLJ16779 - ARFGAP1
BACE1
LOC101928512, CD247
ZC3H10 - ESYT1
NOTCH4 - LOC101929163
HLA-DPA1
MUC22 - HCG22
PSORS1C1
POU5F1
MICA - HLA-X
GGCX - RN7SL126P
COL6A3 - LOC105373957
SKIL - CLDN11
FGF10
CCHCR1
TUBA1C - LOC101927267
BMI1P1 - OPHN1
NPM1P47 - C2CD4B
PYHIN1
LOC105379121 - TSLP
RANBP6 - GTF3AP1
CRCT1 - LCE3E
VWA5A
TOMM22P6 - RPS6P4
BIN2
LOC100287014 - LOC105377623
GAB1
PBX2
HCG23, LOC101929163
LOC102725019 - HLA-DQA2
BRD2 - HLA-DOA
LOC105755953 - LOC101928272
CDK2
ELOVL2
ELOVL2-AS1
SLC30A8
ATCAY
LOC100507661 - LOC105374201
RPL27AP8 - LOC107984570
LOC553139 - HMGB1P18
GRIN2B
LINC01470 - GRIA1
COL6A3
ST3GAL3
GRIK5
PARD6B - BCAS4
MCPH1
ALPK1
MLLT10
LOC105374253 - VPS8
EPB41L4A
LOC105369890 - LOC105369892
SNRPEP4 - SAFB2
LOC102723594 - LOC285043
VAV2
ASIC2
PPAP2B
UNC13B
NSF
WNT3
LOC100128714
LOC105372093, SLC14A1
POLR3G
RNA5SP94 - MIR4432HG
ANKRD6
LOC107987083 - MTCO1P50
CDH2
STAB2
LOC102724497
SEMA3A
TRAF3IP1
RNU6-366P - LOC105370627
HERC1
FCRL3
RHOH - LOC101060498
HLA-DPA2
LOC105378120
BHLHB9P1, TSHR
BCHE
RNPEP
MCF2L
LOC101929154 - AP3B1
LOC107985485 - LOC100129027
COX6A1 - TRIAP1
LOC105379377 - SMARCE1P4
CACNA1D
ZFAND3
LOC100506834
ATP6V1G1P7 - LOC105370340
PIEZO2
ARAP1
MADD
PCSK1, LOC101929710
RPL29P30 - LARP6
SGSM2
SNX7
GRB14 - COBLL1
VPS26A
HMG20A
AP3S2, C15orf38-AP3S2
CYP1A1 - CYP1A2
NCALD
LAMB4 - NRCAM
FFAR4
TTR - B4GALT6
ITPRIPL2 - SYT17
LOC105378088 - SLC22A3
LPAL2
PLG
HLA-W - MICD
HLA-J, ZNRD1-AS1
LOC107986587
MUC22
LOC105375025 - LOC105375027
LINC-PINT
ZNF365
PRKG1
LOC105378449
LOC101928278
CACNA1S - ASCL5
ADK
FIGN - PRPS1P1
LOC100129728 - RPL21P44
LOC102724339 - RNA5SP236
NOV
LOC646383
PLCE1
GOSR2
LOC105378492
UBA52P4 - LOC105377005
SLC39A8
LOC101927697
NT5C2
FES
C20orf187
MAP4
HIST1H4C - HIST1H1T
CAND1.11
ULK4
ARHGAP42
LOC107984032, GUCY1A3
CAPZA1 - MOV10
ZNF652
TBL2
LOC105369980 - LOC105369981
OAS3
SIX3 - LOC101926949
RPS11
RSPO3, LOC105377989
LOC107986166
LOC105377143 - LOC105377144
ZNF827
OAS1
LOC389641
REST
DDX39B, ATP6V1G2-DDX39B
RPS17P5 - LOC100418898
LOC105372898 - LOC105372899
RGS6
LOC105371011
LOC105375733
PINX1
SLC17A1, SLC17A4
PRMT5P1 - EDNRA
LOC105377142
PIK3C2A
LOC105369550
SNX19 - LOC105369577
PLCB2
LOC107984782
LOC105372125
MIR137HG
LOC107984934 - LOC101929406
RERE
SDCCAG8
LOC107985969
AGAP1
PTPRG
ITIH4
LOC105377031
TRIM26
CALN1
LOC105375629 - LOC105375631
ANXA9
C11orf80
CACNB3
LOC105373815 - GLULP6
FOXO6
LOC101927070
RASIP1
SLC45A4
LOC652549 - ADGRL4
ITIH3
MFAP2
LOC101926966 - RNU5E-7P
CDC123
FLJ43879 - HDAC4
CFDP1
CCDC38
NCR3 - UQCRHP1
ARMC2
LRP1
SPATA9
MMP15
CASC15
ITGA1
LOC101928387 - RNU1-146P
C10orf11
ZSCAN31, ZKSCAN3
ASB1
OR5V1
MICB
LOC100288146 - TET2
PSMA4 - CHRNA5
TRIM71
PPP1R14C
LOC101927697 - EBF1
BAG6
SLC39A12 - CACNB2
MPPED2
MTMR4
CAPN7 - SH3BP5-AS1
PKNOX2
LOC105373639
SLC2A9 - WDR1
OASL
TAGLN - PCSK7
LOC100996521
PARP1
LMO7
EFR3B
LOC105378150 - LOC101929614
JAZF1-AS1
FOSL2 - LOC102723530
FGF4 - FGF3
HPSE2
EFS - IL25
LOC105370775 - C15orf53
MAD1L1
LOC105377031 - TRANK1
F5
FGA - FGG
MAP3K19
RNU6-1179P - LOC105372331
UBXN4
PPP3CA
KLKB1 - F11
GRIN2A
SHBG
ALS2CR12
ATM
MX2
LOC101928304 - FAM8A6P
RN7SKP43 - LOC105373877
DIRC3
TNS1
CCDC88A
ANTXR1
SYN3
FAM208A - ARHGEF3
RANBP3L - RNA5SP181
RNU7-133P - LOC105374940
C6orf1
PPARD
LYRM4
ENPP2
ZFAT
SULF1
PPIF - ZCCHC24
ATF7
LOC105370163, DCLK1
TTLL5
ACAN
LOC102724566
MAP3K3, LOC101927898
CSH1 - CSHL1
DYM
C19orf35
ARSE
LOC107986182, LINC01182
BBS9
LINC01370 - LOC105372616
CD53
FREM2
LOC105377910 - POU3F2
TTC7B
PLA2G7
C7orf66 - LOC646614
LOC105369705
LOC105369370 - LOC102724265
LOC105377971, CEP85L
BHLHE40-AS1
MREG - PECR
RPSAP11 - CMTM8
STX18-AS1 - LOC101928279
ADH1B - ADH1C
PAX5
BPESC1 - PISRT1
LOC105372155
RN7SKP104 - TAC1
LOC107986555
LOC105378964
LOC101927389 - TMEM100
SERPINH1
PRKCA
C1orf141
LOC101928661
RPS6KA4
LOC105371252 - RNA5SP426
LINC01514 - LBX1
LOC102723778 - LOC105374564
NKAPL
TSPAN18
MPC2
LSM1
KLHL8 - MIR5705
NBPF3
RNU6-1151P - LOC157273
LOC105376184 - TMEM246-AS1
ST3GAL4
PMFBP1 - LOC105371341
ASGR1 - DLG4
ABHD12
LOC101927479 - ARHGEF19
PKN2-AS1
CEPT1
HMGN2P18 - KRTCAP2
MYO1B
EFHD1
SLC2A2
HPRT1P2 - RPL19P11
MLIP
DLG5
EXOC3L4
RORA, RORA-AS1
CD276
LOC102724084
SOX9-AS1
LOC100505549, ATP8B1
NEDD4L - LOC107985182
MICAL3
LOC100652871 - GSTT2B
ZBTB20
PRKAA1
SLC15A4 - LOC101929984
TIAM1
TJP2
LOC105377999
LOC105369487 - ARHGAP20
LOC101928202 - FCRL5
ACKR1
SGCG
PCNX
SACM1L
USP44 - PGAM1P5
LOC105374786 - LOC101927701
LOC105374391 - LOC105374392
LINC00276
LOC101927174, LOC107986057
LOC105374493 - LOC105374494
ZDHHC14
LOC101927141 - LOC100420845
LOC105376292 - NTMT1
DTWD1
LOC105371070 - LOC105371071
LGALS2 - GGA1
DMD
LOC105374698 - LOC105374701
GSDMA
FCGR2A
ITPKC
LOC105370655
SLC25A46 - BCLAF1P1
ENTPD6
LOC105379132 - RPS17P2
RPL17P2 - LOC101927702
GLI3
LOC107985101
TSLP
IL2
LOC101927026
EPS15
NPHP3-AS1 - TMEM108
ABL2
RORA-AS1, RORA
FOXD2 - RPL21P24
HK2
UMOD
OXTR
LOC101060113 - TERF1P4
FAF1
OPA3
WDR7
MICU3
STAT6
LOC105375011 - HCG4P7
HLA-W
MTCO3P1 - LOC102725019
LOC105377327, FAM13A
RAB4B-EGLN2, RAB4B, MIA-RAB4B
KRT18P51 - HHIP-AS1
IREB2
EFCAB14
RCC2 - ARHGEF10L
DNASE2B
LOC105373907 - SCG2
CWH43
LOC105374882, LOC102723944
COPS5P1 - EPHA7
OLFM1 - LOC102723948
CAMSAP2
DNAH11
DTNB, LOC101929272
PTPRO
LOC107983981
RPL22P13
PDGFRA
SUCLG2
KCNE3
OR10J7P - OR10J8P
IL4R
LINC00299
ERCC4
LOC401312 - LOC541472
RNU7-62P - LOC107984966
KLHL1
RN7SL271P - LOC105377157
ADGRL2
LOC105375707 - RNU4-37P
PSKH1
LOC157273
PLTP - LOC107985388
F2
MIR4752 - LILRA5
LOC105375508
MMAB
LOC101927436 - SCARB1
STARD3
CMIP
TRPS1
ABCA8
COBLL1
ZNF664-FAM101A, ZNF664
ZNF648
PABPC4
DOCK6
LOC100101247 - C6orf106
PGS1
SBNO1
TPM1 - LOC107984798
UBE2L3
R3HDM2
GLULP3 - UBASH3B
LPA - PLG
ANGPTL4
LOC105369688
ARL15
HPR, TXNL4B
TOP1
SLC22A1
PLEC
LOC105373208 - LINC01132
LOC644906 - MYLIP
NPC1L1
NYNRIN
43160
GPAM
FRK
UBXN2B - CYP7A1
EFCAB13
LOC105372618
NAT2 - PSD3
AFF1
FRMD5
LOC101928448
TYW1B
CAPN3
CYP26A1 - NIP7P1
RPL31P23 - PCCB
CTF2P
ZHX3
FER1L4
RAF1
RAB3GAP1
SPTY2D1
EVI5
LOC100421623 - LOC107986386
ANO6
LOC100996634
AKAP6 - NPAS3
CSF2RB
COL4A2
IL17F
PRB2
LOC105374457 - LOC105374459
ITIH5 - ITIH2
NPR3
LOC105376957 - VN1R20P
LOC100506569 - TMEM86A
PRNP - PRND
MTMR7, LOC102724838
LOC105373508 - NPAS2
LOC105373831 - LOC100419513
LOC105373914 - LOC646736
APOA5
PROX1-AS1
RN7SKP168 - ZFYVE9P2
SLC4A1AP
LINC00693 - LOC105377009
POLN
RNF6, ATP8A2P3
STK24
LOC101929643 - YWHAQ
RBPMS
LINC01185
CACNA1C, DCP1B
LOC644265 - LOC105373520
GALNT14
SPCS3 - LOC100421630
EPHA5
RNU6-931P - RN7SKP199
LTV1P1 - LOC107986308
HIST1H4B - HIST1H3B
PDE7A - LOC107986950
ZFP90
LOC100422375 - KCNMB3P1
LOC107986041 - LOC105377008
MLANA, KIAA2026
LOC100506047
LOC285626
KPNB1 - TBKBP1
EPS15L1
LOC105378271
LOC101928464, ZNF433
LOC642791 - SNRPGP16
LINC00331
RPLP0P9 - LOC105377706
PTBP1P
FAM201B - RNU6-175P
LOC100130842 - MIR548AD
LOC100507560 - LOC390282
LOC107985014 - LOC100506974
RNU6-1312P - LOC100124401
EMX2 - LOC107984274
RNF150
ADAM24P - SLC7A2
FANCA
CDK5RAP1
CC2D2A
LOC100130497 - IL12RB2
IL10 - IL19
EIF6
BNC2
TCHHL1 - TCHH
WNT10A
OR2M7 - OR14C36
RPL6P5 - LOC105373664
PRRX2
LOC105375971
EIF3EP2 - LOC101929532
KIAA1217
SLC38A11 - SCN3A
LOC105375791 - MIR1302-7
KIRREL3, ST3GAL4
LIN52
ELMOD1
C15orf38-AP3S2, ARPIN
ABCG1
HCG27
HHLA1
IL10
DAB2IP
IKZF3
SPIB
OSBPL10
LOC105376442
[truncated: 17,109 more rows]

## Sheet: OMIM disease
ALDH1A1
ALDH2
ALDH3A1
ALDH1B1
ACAT2
CHRNA1
CHRNB1
CHRND
CHRNE
CHRNG
ACHE
ASCL1
ACO2
ACO1
ACR
ACRV1
ACTC1
ACTG2
ACTG1
FLNC
ACTN2
ACTN3
ACTN1
ACVR1
RFC4
PML
RFC1
ACVR2A
STAT3
AOAH
ACYP2
APRT
ACTA1
ACTA2
ACTB
SOAT1
APEH
MADCAM1
ADD1
ADD2
DPP4
ADK
AMPD1
AMPD2
AMPD3
ADORA1
ADORA2A
ATP5F1B
ADCYAP1
ADCYAP1R1
AK1
AK2
AK4
ADSS
ADCY8
ADCY2
ADCY1
ARF1
ARF5
ARF3
PLIN2
SLC25A4
FDX1
FDXR
ADM
H19
AGRN
AHNAK
ALB
ADH1A
ADH5
ADH1B
ADH1C
ADH6
ADH4
AKR1A1
ALDOA
ALDOC
AKR1B1
A2M
AFM
AFP
ZFHX3
GANAB
NAGA
GGTA1P
GANC
ADRA2A
ADRA1D
ADRA1B
ADRA1A
LRPAP1
FUT4
ST3GAL4
ADRA2C
ADRA2B
PSEN1
AOC1
CCT6A
SLC3A1
SLC7A1
ACY1
AREG
AMY2A
AMY2B
AMY1A
AMY1B
AMY1C
SAA1
SAA2
SAA4
APP
APCS
APLP1
APLP2
ALK
CDAN3
ANIB1
ANG
AGT
AGTR1
ACE
SLC4A3
ANK2
ANXA3
ANXA4
TAPVR1
MIC12
CD19
CD22
CD44
CD38
CD59
CD72
CD69
SERPINA3
SLPI
SERPINC1
SLC9A1
ALDH7A1
CD3EAP
SERPINA1
IFNAR1
IFNGR1
TFAP2A
APOA2
APOA1
APOA4
APOC1
APOC3
APOB
APOD
APOE
APEX1
APOF
LRP1
NR2F2
AQP1
AQP2
RARS
ARG2
CYP19A1
DDC
ARRB1
ARRB2
CYP1A1
NAT1
GRB2
ASGR1
ASGR2
ASNS
NARS
ATHS
ACLY
ATP5F1C
ATP2A1
ATP2B1
ATP2B4
ATP2B2
ATP2A2
ATP6V0C
ATP6V1E1
NPPA
ASD1
NPR1
NPR2
NPR3
MIC7
SSB
CALR
TRIM21
AXL
LST1
SLC1A5
BPI
SLC4A1
SLC4A2
BSG
CD48
CD40
TNFRSF17
BCL3
BCL6
BTG1
TSPO
ADRB1
GRK2
GRK3
ST6GAL1
HSD17B1
HSD17B2
ADRB2
ADRB3
B2M
B2MR
HSD3B1
BLVRA
HTR1A
CEACAM1
ABO
ART4
GYPC
FUT3
GYPA
RHD
RHCE
B4GALNT2
GYPB
CD80
CD79A
MS4A1
BGLAP
BMP2
BMP4
BMP3
BMP1
BMP5
BMP6
BMP7
BDKRB2
BDNF
YWHAH
BCAT1
BCAT2
RPL13
BRCA1
TFF1
POU4F2
UCP1
DST
COL17A1
C5AR1
CAD
CDH15
CDH2
CDH3
CTNNA2
CALB1
CALB2
ANXA6
CAMK2A
CAMK4
S100A10
CAST
PPP3CA
PPP3CB
PPP3CC
S100A6
CALCA
CALCR
CALCB
CAPNS1
CALM1
CALM2
CALM3
CALML3
CALCRL
CACNA2D1
CACNA1C
CACNA1D
CACNB1
CACNA1S
CACNG1
S100A4
CAPS
CALD1
CANX
CAPN1
CAPN2
CAPN3
CASQ1
CASQ2
CD52
NUP214
CNR1
CA3
CA4
CA5A
CA7
CA6
CA1
CA8
CBR1
CES1
CEL
CPA1
CPA3
CPB1
CPE
CPM
CEACAM5
HAPLN1
MATN1
CSNK2A1
CSNK2B
CSNK2A2
CSN1S1
CSN2
CAT
TYRP1
CTAA1
CCA1
CCV
COMT
CTNNA1
CTNNB1
CTSB
CTSH
CTSG
GZMH
CTSD
CTSS
CTSL
CTSE
CUX1
CEBPA
CEBPD
CDKN1A
CKS1B
CKS2
NCAM1
CDK1
MCM2
CDC27
CDC25A
CDC34
CDC25B
CDK11A
CDC42
CDK2
CNBP
RBL1
MORF4
CENPA
CENPB
CENPC
CENPE
CDR2
CP
HSPD1
CHN1
CLCN1
CCK
CCKAR
CCKBR
CYP7A1
CETP
CYP11A1
CHAT
CHKA
CHRM2
CHRM3
CHRM4
CHRM5
CHRNA2
CHRNA3
CHRNA4
CHRNA5
CHRNB2
CHRNB3
CHRNB4
CHRM1
CHRNA7
VCAN
CSH2
CHML
CGA
CGB3
NHCP1
CTRL
CTRB1
CHGA
CHGB
SCG2
CMA1
CNTF
CNTFR
CS
CLTC
CLTA
CLTB
SSFA2
OFC1
CXB3S
COL4A3
COL4A2
CLPS
COL10A1
COL7A1
COL4A1
COL4A4
COL2A1
COL1A1
COL1A2
COL19A1
COL3A1
COL5A2
COL9A1
COL5A1
COL5A3
COL6A1
COL6A2
COL6A3
COL8A1
COL8A2
COL9A2
COL9A3
COL11A1
COL11A2
COL12A1
COL14A1
COL15A1
COL16A1
COL18A1
COL1AR
COL13A1
MMP1
MMP8
MMP2
MMP9
CSF1
MLH1
DCC
MME
C1QA
C1QB
C1QC
CD93
C1S
CR1
CR2
C3
C4A
C4B
C4BPA
C4BPB
C5
CD46
C8G
C9
C8A
C8B
ITGAM
CTGF
PPBP
GJB2
GJA4
GJA5
GJA1
GJA3
CBFB
CNA1
HCVS
SERPINA6
CRHBP
CRH
CRHR1
CYP2A6
MSX2
CRP
CKB
CKMT1B
CKMT2
CKM
CRYAA
CRYAB
CRYBA1
CRYBB2
CRYBB3
CRYBA4
CRYGA
CRYGB
CRYGC
CRYGD
CRYZ
PCYT1A
CRYGS
CRYM
ATF1
PDE3A
CREB1
ATF2
CREM
CNGA1
CDK3
CDK4
CNP
CDK5
CDKN3
CCND2
CCND3
CCNA2
CCNB1
CCNE1
CCNC
PPIA
PPIB
PPIC
CST1
CST2
CST4
CST5
CARS
CTPS1
COX4I1
COX5B
COX8A
CRIP1
CSRP1
S100A8
S100A9
IL10RB
CTLA4
EZR
GZMB
CDA
CYP2B6
KRT4
CYCS
CYC1
COX7A1
COX7A2
CYP3A4
POR
CYP2C19
CYP2D6
CYP2E1
DAO
CYP1A2
CYP2F1
CYP4B1
CYP11B2
COX6B1
COX6C
IL10
CSK
DBP
DDO
DEFA1
CD55
DCN
VDI
SULT2A1
DEK
REEP5
ALAD
ALAS1
DMTN
DCK
MAFD1
DSPP
DNASE1
DPT
DSC1
DSC2
DSP
DES
DSG1
DSG2
DGKA
NQO1
DBI
DHFR
DLST
DHODH
CYP24A1
PCBD1
ARNT
DPP6
HBEGF
DLX2
GADD45A
DDIT3
ERCC2
DNASE2
DNMT1
ERCC1
LIG1
TOP1
TOP2A
TOP2B
DRD1
DRD2
DRD3
DRD4
DRD5
SLC6A3
SLC26A3
DBN1
DURS1
DAG1
UTRN
SNRPE
EGR1
EGR4
EGR2
E11S
NT5E
EEC1
CELA1
ELANE
SERPINB1
ELN
EEGV1
ETFB
EPB41
EEF1A1
EEF1D
EEF1G
EEF2
RPS14
EMILIN1
ERV3-1
ENG
SELE
FGF1
TYMP
ANXA5
KDELR1
EDN1
EDN2
EDN3
EDNRA
EDNRB
EN1
EN2
GATA3
PENK
PDYN
ENO2
ENO3
NID1
RNASE3
EPX
RNASE2
EGF
EGFR
FLOT2
STX2
EPHX1
EPHX2
NR2F6
NR2F1
STOM
EPO
EPOR
ESA4
ESD
ESB3
ESR1
RUNX1T1
EIF4E
EWSR1
ERCC3
ERCC4
ERCC5
ERCM1
SLC1A1
CFD
CFH
CFHR1
F3
F13A1
F13B
FDPS
FNTA
FNTB
FAS
FASLG
FABP2
FABP1
FABP3
GSTP1
FAU
FTH1
FTL
FBL
FBN1
FGA
FGB
FGG
FGF2
FGF6
FGFR3
FGFR4
FN1
ITGA5
ITGB1
FBLN1
FBLN2
FLG
FMO1
FMO4
FMO3
FGFR1
FLT3
FLT4
FOLR2
FOLR1
FSHR
KDSR
FST
FPGS
FOSL1
FSHB
FOXO1
FMN1
FPR1
FPR2
FPR3
FUCA2
FUT5
FUT6
FH
FURIN
TSTA3
FYN
GRK4
GALK2
GALM
GAL
B4GALT1
FUS
IGAD1
GABRA2
GABRA4
GABRA5
GABRA6
ABAT
GABRA1
GABRR1
GABRR2
GABRD
GABRG2
SLC6A1
GABRG1
GGCX
GGT5
GGCT
GGT2
GABRB1
GABRB3
LRRC32
ATP4A
ATP4B
GIP
GIPR
GAST
GRP
TACSTD2
GATA2
GSN
SLC20A1
GFAP
MPV17
GCG
GLP1R
GCGR
NR3C1
GCK
H6PD
HSPA5
GLUD1
SLC2A1
GOT2
SLC2A2
SLC2A3
GOT1
SLC2A4
GPT
GPT2
SLC2A5
GRIK3
GRIK2
GRIK1
GRIA4
GRIA2
GRIA1
GRIN1
ALDH18A1
GRINA
GRIN2B
GRIN2A
GRIN2C
GAD2
GLS
GLUL
GFPT1
EPRS
ENPEP
GSR
GPX2
GPX1
GPX3
GPX4
MGST1
GSTM4
GSTM1
GSTA1
GSTA2
GSTM2
GSTM5
GSTM3
GAPDH
GPD1
GPD2
GART
SHMT2
CFB
GLYB
GLRA1
GLRB
PYGB
GYS1
GYS2
GYPE
ORM1
ORM2
A1BG
AHSG
APOH
GP1BB
GLO1
HAGH
GNRHR
GSC
GRN
CSF2
CXCL6
CSF3
CSF3R
CEBPG
CSF2RB
SLC25A16
CXCL2
CXCL3
GNB3
NR4A1
RASA1
GNAZ
GNAI2P1
GAS1
GHRH
GHRHR
GC
GH2
GH1
MT3
GSPT1
GDA
GMPR
GUK1
GNAI1
GNAO1
GNAL
GNA11
GNA15
GNAS
GNAT1
GNAT2
KRT1
GNAI2
GNAI3
GNB1
GNB2
GNGT2
GUCA2A
GNAT3
GUCY1A1
GUCY1B1
HES1
GZMA
HP
HPR
HSPA1A
HSPA6
HSPA7
HSPA1L
HSPA2
HSP90AA1
HSP90AB1
HSP90AA2P
HSF1
HSF2
ST5
NCKAP1L
HMOX1
HMOX2
HBA1
HBA2
HBB
HBD
HBE1
HBG1
HIST1H1D
HIST1H1E
CD34
HBQ1
HBG2
HPX
HBZ
HPFH2
DIH1
SERPIND1
HCK
HLF
MST1
HGF
HNF1A
HPN
NRG1
SDC2
HSPG2
DDX39B
HK3
PRRC2A
BAG6
HK1
GPANK1
ABHD16A
HPCA
HRG
HDLBP
HTN1
HTN3
HRH2
HDC
HRC
H1F0
HIST1H1A
HIST1H1C
HIST1H1B
HIST1H1T
HIST2H2AA3
HIST2H4A
H2AFZ
RFX2
HIST2H3C
CD74
HLA-A
HARS
HLA-B
HLA-C
HLA-DMA
HLA-DMB
HLA-DRB1
HLA-DPB1
HLA-DRA
HLA-G
HLA-DPA1
HMGCR
HLA-DOA
HMGCS1
HOXA7
HOXA6
HOXA5
HOXA4
HOXA3
HOXA1
HOXA9
HOXA10
HOXA11
HOXA13
HOXB5
HOXB6
HOXB7
HOXB8
HOXB9
HOXB4
HOXB3
HOXB2
HOXB1
HOXC8
HOXC9
HOXC6
HOXC5
HOXC4
HOXC12
HOXC13
HOXD3
HOXD4
HOXD9
MSX1
HOXD10
HOXD8
HOXD11
HOXD1
HOXD12
HOXD13
EVX2
HMX1
VSX2
MNX1
HLX
EVX1
HLA-E
RASSF7
GNL1
HRES1
CD9
HIVEP2
CCNT1
FOXN2
HLA-F
MEA1
HADHB
ACSM3
HTC1
ICAM2
ICAM3
ITIH2
ITIH3
IL7
IL7R
IDE
IMPDH1
IMPDH2
IL2RB
IGFBP1
IGFBP2
IGFBP3
IGFBP4
IGFBP5
IGFBP6
INSL3
FCGR3A
FCGR1A
IGLL1
IGKDEL
FCGR2A
HLA-DQA1
IGHA1
IGH
ADAR
CXCR2
CXCR1
CXCL8
IL9
IL10RA
IGHA2
IGHM
IFIT2
FCAR
IGES
IGHG1
IGHG2
IGHG3
IGHG4
MS4A2
FCER1G
FCER1A
TCF3
MX1
IGHD
IGHE
RBPJ
IGKV1OR2-108
IGKC
IGLC1
CD79B
INPP1
INPP5B
ITPR1
ITPR3
ITIH1
IGF2R
INHBA
CXCL10
IVL
IGF1R
INHA
INHBB
IDO1
IGF1
SOD1
SOD2
IGF2
IPP
ITPA
ITPKA
ITPKB
IRS1
IFNW1
ITGA6
ITGB4
ITGB6
ITGB7
ITGB5
IFNA2
IBSP
IFNA4
IFNA5
IFNA6
IFNA7
IFNA8
IFNGR2
IFNG
ISG15
IFI6
IFNR
IRF9
IRF1
IRF2
IFNA10
IFNA13
IFNA14
IFNA16
IREB2
IFNA17
IFNA21
IFI16
IL6
ICA1
IFNB1
IDH2
IFNA1
INSR
INSRR
CASP1
IL1RN
IL2
IL11
IL13
FOXK2
IFIT1
IDH1
IL1B
IL2RA
IL3
IL1A
IL4
IL4R
JCHAIN
JAK1
JAK2
IL1R1
IL1R2
ICAM1
IL5
IL5RA
WNT2
IL6R
MX2
DIO1
KLK1
SERPINA4
IAPP
KLK2
KRT19
KRTAP5-9
KRTAP5-1
KRT15
KRT5
KRT6A
KRT6B
KRT3
KRT7
KRT8
KRT13
KRT14
KRT16
KRT17
KRT18
KRT10
FGF7
KWE
KIF11
LALBA
LDHA
LDHB
LDHC
CSH1
LPO
LTF
LAMB1
LAMC1
LAMC2
LAMB3
LAMA1
LAMB2
LMNA
LMNB1
LMNB2
RPSA
LTBP1
LGALS1
LGALS2
B3GAT1
LNPEP
HTL
LARS
RUNX1
BCR
BCL2
LYL1
BCL5
STMN1
LIFR
FCER2
PTPRC
ITGAX
LTK
CD37
CD53
ANPEP
LTA4H
LGTN
L1RE1
L1RE2
LIPC
LCN1
ANXA1
ANXA2
LIPE
LBP
LPA
TFPI
ALOX5
ALOX12
ALOX15
ACSL1
KCNH2
LOR
XRCC6
GNRH1
LHB
LHCGR
SELL
TNFRSF8
LEF1
CLC
LAMP1
LAG3
CD5
ITGAL
LCK
CD58
LCP1
LSP1
LAKLG
LTA
LYZ
PLOD1
LOX
LOXL1
CAPG
MRC1
LGALS3
MIF
MSR1
CD68
VMD1
CYMD
YBX1
NELFE
LIM2
MIP
MDH2
MDH1
MAK
ME1
ME2
MHS2
SAI1
MGAM
PSMC2
M6PR
MBL2
MPI
MAN2C1
MAN2A1
SERPINB5
MGP
MAX
ADAM11
MC3R
MC4R
PMEL
MC1R
CMM
CXCL1
MCAM
CD63
MELTF
ACAN
MROS
CD200
MN1
LAMA2
MT1B
MT1A
MT1E
MT1F
MT1G
MT1H
MT1IP
MT1JP
MT1M
MT1L
MT1X
MT2A
NME1
NME2
MBD1
MTAP
MARS
MPG
MGMT
MTR
MFAP2
MITF
MAP1B
MAP2
MAP4
MAPT
MSMB
MTTP
NDUFS1
RMRP
CDC25C
MMVP1
MBS1
PSMD7
SLC3A2
CCL2
CCL7
CD14
MLN
MUC1
ABCC1
MUC2
MUC3A
MUC4
MUC5AC
MUC6
MUC7
SLC20A2
EVI2A
EVI2B
MCC
MYBL1
MBP
MPZ
MAG
MOG
MPL
LIF
MCL1
MNDA
KMT2A
MLLT1
AFF1
MLLT3
AFDN
CD33
MYOD1
MYOG
MYF5
MYF6
MB
MYP2
MYH6
MYH3
MYH1
MYH2
MYH8
MYH4
MYH11
MYH7
MYL4
MYH9
MYH10
MYO5A
MYL1
MYL2
MYL5
MYL3
MYBPC2
MYBPC1
MYBPH
NMT1
HNRNPM
MGAT1
NQO2
NDUFV1
KLRC1
IL12A
IL12B
NKTR
NEB
NGFR
NGF
GAP43
NRL
PTN
MDK
PCSK1
PCSK2
NEFH
NEFM
NEFL
TAC1
TACR2
TACR1
TAC3
TACR3
NMB
NMBR
NHLH1
NHLH2
NPY
NPY1R
NPY2R
CXCR4
NTS
NTSR1
NTF3
NTF4
AZU1
NM
CD177
NFE2L1
NOS3
NOS2
NOS1
SNCA
HMGB1
HMGB2
HMGN2
HMGN1
SLC6A2
CEACAM6
NFIX
NFKBIA
NUMA1
CHMP1A
NFKB1
NFKB2
NFRKB
RELA
MATR3
HNRNPA1
HNRNPC
NOP2
NCL
NPM1
PNP
NAP1L1
NYS2
LEP
POU2F1
POU2F2
POU5F1
OBP2A
OMP
OR1D2
EBF1
OMG
OAS1
ATP5F1A
ABL2
ETS1
AKT1
AKT2
ETS2
VIS1
BRAF
RAF1
RET
CRK
CTTN
CSF1R
FOSB
SKI
MDM2
NRAS
OCM
FOS
WNT1
BMI1
MYCN
MYCL
MET
ERBB2
ETV3
FOXG1
VAV1
YES1
REL
KIT
FGR
FGF3
NOTCH4
NOV
PIM1
WNT5A
FGF4
ROS1
RAB8A
TRU-TCA1-1
FLT1
ERG
RRAS
OSM
SEA
LYN
PVT1
JUN
JUNB
JUND
SPI1
MAS1
FGF5
OPRD1
OPRK1
MECOM
GLI1
GLI2
GLI3
HKR1
ZSCAN22
ZBTB48
GLI4
WNT3
SKIL
CBL
RHOB
RHOC
RHOA
ODC1
SPP1
OTSC1
NBR1
OSBP
OXT
OXTR
PCSK6
PAX2
PAX7
PAX1
PAX4
PAX5
PAX8
PAX9
PRRX1
REG1A
REG1B
PPY
SPINK1
REG3A
ELAVL4
PTMS
PTH
CCND1
PTH1R
PTHLH
PRH1
PRH2
PRB2
PON1
PRB3
PTLAH
PVALB
CDK18
DSG3
PGA4
PGA5
PGC
CNDP2
PEPB
PEPC
PEPE
LAP3
TAP1
TAP2
PAM
PRF1
NUP85
PLIN1
PRPH
PMP2
PEX2
ABCD3
PPARA
ABCB1
ABCB4
SULT1A1
PNMT
PDC
ACP1
ACP5
ACP2
ALPI
ALPL
ACPP
ALPP
ALPPL2
PIK3R1
PIK3CA
PFKFB2
PFKP
PFKL
PDE7A
PDE1A
PDE1B
PGM1
PGM2
PGM3
PGD
PGAM1
PGK2
PGP
GPI
PLN
PLA2G1B
PLA2G2A
PLCG1
PLTP
ENO1
PAICS
PPAT
MTHFD1
PHKG1
PHKG2
PSPH
PHKB
SERPINF1
POU1F1
SCG5
PAEP
RNH1
SERPINB6
JUP
ENPP1
PLGLB1
PLG
SERPINE1
PLAT
SERPINB2
PLAUR
PTAFR
PDGFRB
PDGFA
PECAM1
PF4
PF4V1
ITGB3
PDGFRA
CD36
GP5
GP9
PLEK
SELP
PVR
PARP1
PIGR
PKD2
POLB
POLD1
POLE
POLG
KCNC2
KCNA6
KCNC1
KCNA1
KCNE1
KCNA2
KCNA3
KCNC3
KCNC4
KCNA4
KCNA5
KCNA7
DLK1
TTR
PBX1
PBX2
PBX3
PAPPA
PSG1
PSG2
PSG3
PSG4
PSG5
PSG6
PSG7
PSG8
PSG9
PSG10P
PSG11
PZP
PFN2
PFN1
PRIM1
PRIM2
PRNP
PHB
P4HA1
PIP
INS
PCNA
MKI67
PRL
PRLR
PRDX1
PRCP
P4HB
PMCHL1
PMCHL2
PMCH
ZBTB16
PSAP
PTGER1
PTGDS
PTGER2
PTGS1
PTGER3
KLK3
POMC
PSMA2
PSMA3
PSMA5
PSMA4
PSMB10
PCMT1
AMBP
EIF2AK2
MAP2K1
CDK11B
PPP1CA
PTPN11
PTPN3
PTPN4
PTPN5
PROS1
PTPRB
PTPN6
PTPRA
PTPN1
PTPRG
PTPN2
PTPRM
PTPN7
PTPRZ1
PRKACB
PRKACG
PRKG1
PROZ
PRKAR2A
PRKAR1B
PRKAR2B
PPP1CC
PPP2CA
PPP2CB
F2
S100A1
TYK2
FER
FGFR2
EPHA8
EPHA2
ZAP70
MAPK1
MAPK4
PRKCA
PRKCB
PRKCE
PRKCD
PRKCG
RACK1
PRKCZ
S100B
S100A5
S100A3
S100A2
SERPINE2
PSKH1
PRTN3
SRGN
PSMB9
PSMB8
PRKCSH
MARCKS
EPB42
MAF
BCHE
PTOS1
SFTPC
SFTPA1
SFTPD
SFTPB
SFTPA2
MMP7
PDXK
PPA1
PYCR1
PKM
PDHB
PDHA2
RABGGTB
UBE2B
RDX
RAB3A
RAP1GDS1
RRAD
RHOG
RAB1A
RAB2A
RAB3B
RAB4A
RAB5A
RAB6A
RAB5B
RAP1A
RAP1B
RAP2A
RAP2B
RALA
RALB
RSU1
PTPRF
PRPH2
EPHA1
EPHA3
RAG1
RAG2
RAD51
RCVRN
RCC1
RLN1
RLN2
PRCC
DPEP1
REN
RPA1
RPA2
RPA3
CLIP1
RCD1
RD3
RPE65
PDE6A
PDE6B
PDE6G
RLBP1
RARG
ARID4A
KDM5A
RBL2
RARB
CRABP1
CRABP2
RARA
RXRA
RXRB
RXRG
RBP4
RBP1
RBP2
RBP3
RHAG
TST
RHO
GRK1
LMO2
LMO3
RRM2
RRM1
RN5S1@
RPIA
RNASEL
RNASE1
RNR1
RNR2
RNR3
RNR4
RNR5
RPS6
RPS20P3
RPS20P4
RPS25
RPL19
RPL30
RPL35A
RPL36AL
RPN1
RPS11
RPS17
RPS18
RPL22
RPL12
RPS13
RPS21
RPS3A
RPL4
RPE
RPN2
RPLP0
RPLP1
RPLP2
RPS15
RLF
TRX-CAT2-1
TRX-CAT1-2
DDX5
TRE-TTC3-1
SNORA73A
SNORA62
SNORA63
POLR2A
POLR2B
POLR2I
POLR2C
POLR2E
RNU1-4
RNU2-1
RNU5A-1
RNU6-1
SNORD3A
ROM1
SNRNP70
RYR1
RYR2
RYR3
AHCY
AMD1
PRB1
PRB4
SAG
TSPAN31
SCZD1
STIL
TYS
SCTR
SCT
FUT2
CYTH1
SPARC
SPR
SDS
HTR1B
HTR1E
HTR1D
HTR1F
HTR2A
HTR7
SLC6A4
HTR3A
SEMG1
SEMG2
SHMT1
SPN
SRP19
SRPRA
SHBG
PI3
SPRR1A
SPRR1B
SPRR2A
SPRR2B
SPRR3
SNRPN
CCL1
SNRPB
CCL3
CCL4
SNRPA
SLC8A1
SLC9A3
SLC17A1
SLC34A1
ATP1A1
ATP1B1
ATP1B2
ATP1A2
ATP1A3
ATP12A
SLC5A1
SLC5A2
SCN1A
[truncated: 7,915 more rows]

## Sheet: virus host
LYPLAL1
TSR2
TBL2
PAK4
BCKDK
PSMD6
PPAPDC2
TMEM87B
C12orf24
PPP1R13B
UBL4A
NFIB
NFE2L2
INO80B
PPP6R3
ABCD3
FBXW7
IKBIP
AP2A1
CHP
TRIM27
AP2A2
XPO1
RPS27L
APOE
FAM134C
FNDC3B
PDXDC1
CCDC14
ATP13A1
TGFBI
BIN3
TGFB1I1
CTNNA1
ROBO1
SVIL
RORA
TGFBR2
VAMP7
PSME3
FATE1
ELF1
NEDD4
SLC39A6
PEF1
PIN4
ITFG1
TMEM126A
WWP2
FAM200A
RARA
MDFI
SEPT9
SRP9
CHRM2
KLF7
MMP14
UTP14C
INCA1
SDCBP
CAND1
GPD2
C17orf103
SRP19
ICAM1
POGZ
ANO6
CCDC67
ZGPAT
PCDH18
ATP5J
CDK2
GPAA1
CARD9
TMEM59
BAG5
TECR
GPANK1
ASPH
IFRD2
SH3GLB2
ADAM10
PTPN1
CDC23
SP100
ZBTB16
SORT1
S100A6
CCND3
CCT6A
PRKAR1A
EPHB2
VPS26A
LRP10
FADS2
MAVS
TCHP
SEC22B
NEDD4L
TMX3
ATAD1
APOB
NECAB2
RNPC3
RAB34
MAGEA1
CCDC155
GALNT5
HSD17B4
SLC27A1
RPL35
ISG15
CAV1
PSMD3
FAM8A1
PSMC4
PSMC5
PSMC6
PSMD1
PSMC1
PSMC2
PSMC3
C5orf55
TMEM158
RPS13
GGT7
CCDC120
CNBP
MCM3
NAALADL2
DDX55
GNPTG
LRRC59
C3orf43
STRN
CXCL13
NFIA
MRFAP1L1
CALCOCO2
TEAD4
NSMCE2
MCM7
RCN2
CRIM1
RBMY1F
PSMD11
PTPRK
RSRC2
TOR1AIP2
RNF126
ZHX2
FUBP3
ALG5
AXL
POLE4
STRN4
LRP12
STRN3
TAP2
TAP1
PBK
USF1
HDLBP
DTX3L
GSTA4
CEBPB
SCNM1
PLOD1
CLU
POU2F2
KIAA1530
GRAMD1A
CLK2
NAGK
RB1
RASD1
AFG3L2
SDF4
LENG1
MAX
ZC3H18
COIL
AP2M1
MAP4K4
RRBP1
MGST1
ENDOD1
MID2
ECE1
STT3A
CEP76
GATAD2B
TNFRSF10B
S100A16
DMRT3
NACA
ERLIN2
TBXAS1
SNX3
KDM1A
TTC12
CDS2
BEND7
LAMTOR3
DNAJB1
KDSR
SLC44A2
TRAF1
BSG
SLC38A10
MBIP
SMC6
RNF220
PBXIP1
RAB18
MED1
LEMD3
SLIRP
PATZ1
TFG
FOXK1
TRIM32
ATP2B1
GLYCTK
ATP2B4
CREB3
WRNIP1
SLC25A1
ABCB7
ABCF1
JAKMIP2
SIAH1
PRTFDC1
CTCF
ARNTL
FARS2
DNAJB5
CPT1A
ARL1
ZNF207
CGRRF1
EMD
KPNB1
TRAM1
BCAS2
CYCS
KPNA2
KPNA3
ISCU
P4HA1
KIAA0664
EGFR
SIPA1L2
PRDX3
ZER1
FAM161A
EGR2
EGR1
MRC2
AAK1
SGPL1
HNRNPH2
MAP4
TSPYL1
PSMB4
PSMB5
IPO5
TNPO1
PSMB8
PSMB6
UGGT2
CAPN2
CCNDBP1
TMX2
CANX
CEP70
CAPN1
AGK
C14orf93
TMEM55A
KIRREL
MRPL53
BYSL
ARHGAP35
SELRC1
FLI1
POLM
PLD3
ARHGDIA
HSPA4
TFRC
PPM1A
PPM1B
PPM1G
CTBP2
MPZL1
DNAJB2
DNAJA1
STAU1
FAM195B
HM13
PKD2
DHCR24
SP1
SOX11
SPERT
KANK2
ABCC4
PRKCDBP
DDOST
DDX6
GLYR1
REL
MRPL43
TUBA3E
PSMB1
EHD2
BAX
ADAM9
NCOA3
GMCL1
CD160
DNAJB4
SCYL1
AKAP8L
FHL2
DPP9
GPX8
NFU1
FAM164C
ITM2C
GBF1
ITGB3
TRAFD1
UBR4
EPN1
PNPLA6
FAM111A
PPFIA1
SLC16A3
KIAA1377
B3GNT1
CNTNAP1
PNMA1
P4HB
ATP13A3
POLR1C
BAG2
BAG3
E2F6
E2F4
E2F5
E2F2
E2F3
VTA1
BAG6
ERC1
CHPF
EXPH5
TAF6L
S100A13
EPRS
NAT14
NFKB2
ETV4
DNAJC11
CTNND1
ZRANB2
CTSB
ETS1
USP9X
KHDRBS2
GAS6
GATA6
VPS39
PHB2
RRAS2
CREB5
MEOX2
PDLIM4
IKZF3
PRAF2
SEC63
CCPG1
ANKRD13A
IGF2BP2
MIPOL1
PDCD6IP
HES1
PSMD13
PSMD12
ABCA1
ATP2C1
PSMD7
AES
PSMD4
EXOC8
ENG
GJA1
VARS
MYOZ1
UTRN
TRPV2
STUB1
PI4K2A
SLC12A8
EHF
SSFA2
PFKP
ATP5H
DNAJC16
SNRPB2
C2orf85
BIK
DOCK9
HDAC4
FRMPD4
LMO7
TFIP11
ABHD12
PEX14
DARS
UBE2I
USH1C
MAP7D1
CCDC94
PTPLAD1
RBMX
BCL10
CEP44
EXOC5
ZNF250
PPP1R18
TACC1
HCCS
TMEM120A
THRA
RPL9
NDUFS1
PON2
LRRC8A
RBM4
GNPTAB
RBL1
PTDSS2
FZD2
RBMS2
JAK1
TAF9
CNP
PSMA1
SAP30BP
IRF1
C15orf55
RAB3IP
PHC2
ROPN1
SSX2IP
EMILIN1
PARVG
ITCH
ERGIC1
ATRX
CSPG4
RTN4
CSRP2
UBQLN1
CDK4
COPB1
COPA
CDC20
COMT
COPB2
PAK2
MAFF
NDC80
PTRF
HDAC7
LAS1L
SGCD
GPRASP2
SGCB
PCYOX1
PTK7
IP6K2
MFAP1
SGTA
SPPL2B
GNS
WLS
ATP11C
LNX2
OTX1
RCAN1
UBAC2
SLC12A4
KCMF1
TM9SF3
PDLIM5
RUNX1
ERLIN1
ATXN2
SPAG5
CREBL2
MKRN3
TIMM50
MTUS2
SLFN11
CREBBP
F2R
CRYBG3
LDLR
USP2
CBX5
VPS35
RPL3
DNAJA3
PRMT1
C1D
LRPPRC
CSDA
PDE4DIP
USMG5
FZD6
CAPZB
AP3B1
UBR5
ZMYND10
SEC16A
TRPA1
TAX1BP1
SARS2
IL6ST
PIEZO1
RIMS3
SNX17
PSMA7
PSMA4
PSMA3
PSMA6
PSMA5
PSMA2
USP47
TNS3
NCOA2
L3MBTL3
STT3B
LMO3
NUMBL
TFAP4
TFAP2C
TFAP2A
SP4
SP3
KPNA4
LGALS14
TFDP2
KIAA1715
SPARC
TSTD2
BCL2L13
IMMT
STAT3
STAT4
STAT5A
RAB32
MTCH2
STAT1
STAT2
ZBTB25
PAF1
DPM1
TFDP1
RELB
NSMCE4A
TBC1D19
UPF1
GTPBP10
IMPA1
BAK1
WDR5
BACH1
TFCP2
PTPN21
FASN
FAT1
ZYX
GOLGA2
HMOX2
SEC62
CCNG2
TP53
SQRDL
SRPRB
TM9SF1
MAGED2
FBXL18
AGPAT6
PTBP1
ATP5C1
TMEM43
TIMM8A
OLA1
RPL13A
NCEH1
AIFM1
SRRM2
SLC15A4
HSPBP1
PRDM1
MAGED1
GABPB2
IGF2BP1
IGF2BP3
GALNT1
FOSL1
SLC3A2
SLC4A2
TMEM35
PIGS
E2F1
JUN
JUNB
MOGS
TRPM4
PJA2
AP2B1
SLC35E1
TRIM38
ITGB1
CD44
STOM
ESYT1
ESYT2
FAM71C
GADD45GIP1
GCN1L1
STAMBPL1
RPS6KA3
SFXN3
PRPF31
RNH1
ESRRG
PCNA
SMAD3
PITPNM3
PLEKHA5
TRAF4
TOLLIP
SYT16
NSD1
RFTN1
ZW10
GLB1
TIMM13
SNX19
AKAP12
KPNA6
ZBED1
FAM124A
UACA
CCT3
BANP
PSME1
SSR4
ATL3
GLRB
NUP50
EP300
AHCYL1
RPS24
FAM82A2
ERP44
CAP2
CCNA2
LAMP1
HBP1
COPG2
CCNE1
ATAD3A
SFI1
SRPK1
MLEC
SRPR
PRIM2
YIPF3
SEC11A
NFKB1
RAB5C
MXRA8
UBE3A
SDCBP2
MAZ
RELA
GPRC5B
RHOT1
LOX
WWOX
DAXX
SIDT2
PHLDB2
ERG
SCCPDH
FAM208B
CDKAL1
SMC5
IWS1
SCLT1
MARCO
ABCD1
TBC1D15
TMEM165
RINT1
RHOT2
CA8
LMO2
CTSA
TMPO
HSFY1
PSMD14
TAF6
TAF4
CTTNBP2NL
LEF1
SIK1
HSD17B14
MBOAT7
SNTB2
DYNC1H1
PREB
RANBP2
NOXA1
RAP1A
SEC61B
CDCP1
KIAA0564
KIAA1598
DDX24
FAM136A
CD248
IGF2R
GEM
PPP2R1A
AMFR
VPS11
CATSPER1
PGAM5
RACGAP1
MLST8
GABPB1
RING1
ARL16
TEAD2
MRPS6
NR5A2
GYS1
DIP2B
RNF219
TRPT1
KRTAP13-1
SLAIN2
ATP5O
PDGFRB
DNAJB6
NRF1
PDLIM7
DOCK11
FKBP8
TSPY1
NFE2L3
YME1L1
USP7
PIGK
MAP2K3
QSOX1
USHBP1
CEP170
KIF23
HGS
NFYA
NFYB
HSPB6
TMEM87A
RBPMS
GPR124
SLC1A5
PRKAB2
SLC2A1
PSMB2
DVL2
PRKAA2
HP1BP3
PSMB3
SPATS2L
KIAA2013
CCDC33
SARS
EAF1
LMOD1
CIR1
ANXA5
ANXA6
LGALS3BP
LNX1
OPTN
RABL3
RFC5
WDYHV1
EEF1B2
CAPN3
CLEC7A
AKAP10
SCFD1
MICAL2
PGRMC2
OCIAD1
PSMB10
PIGO
MTMR3
P4HA2
MAP3K11
AMOTL2
STOML2
CRX
GFPT1
FAM50B
TBC1D17
GGCX
MAML1
ZFP161
CCHCR1
NDE1
LAMTOR1
QARS
DNAJC7
SURF4
KHDRBS1
PDIA3
STX12
RBPJ
NFKBID
PLXNB2
NDEL1
ZNF410
TXNDC5
SPTLC1
PRKAA1
PGRMC1
RUVBL2
HSPA4L
SH3BP4
SLC27A4
ERLEC1
UBASH3B
NEFL
SRPK2
ZNF131
PTPN14
PARD6B
CEP57L1
ZNF219
POLR3GL
SFN
CERS2
LZTS2
CA1
HPCAL4
TRHDE
ACSL4
ACSL3
NDFIP1
MYC
MYBL2
MYB
MYBL1
TMEM33
L3MBTL2
CDKN1A
CLCN7
TP73
C1orf50
SPNS1
ACBD3
TBC1D7
FOS
PARP9
FOSL2
BCL6
ZNF408
ZNF581
CLPTM1
ABCC1
HOMER3
ZNF417
RPL21
TPP1
MFGE8
P4HA3
PIGU
SENP2
PSMF1
KLHL12
FAM40A
MORN3
C19orf6
ACLY
CCDC36
PIGT
KIAA0889
RPN2
RBL2
MRPL12
ZNF281
COL6A3
PPP1R16B
MED4
ATF3
CREB3L1
PDIA4
SLC9A3R2
ENPP1
ATP9A
C14orf105
MYOF
PSME4
EFEMP2
ATP2A2
COPE
FAF2
CCT5
C1orf94
ENY2
C9orf167
TMEM214
FAM90A1
POP7
RPS25
SCN9A
ELF4
ATP1A1
HSD17B12
ELK3
HNRNPK
RRAS
NOTCH3
NOTCH2
WFS1

## Sheet: promoter
Q9NSV7
Q8NG00
NP_079072
CB45_HUMAN
UBE2J2
NP_115724
AKIP_HUMAN
MRPL20
ATAD3B
ATAD3A
NP_054907
Q9P0E8
CDC2L2
PRKCZ
NP_872339
Q9H7Y2
SKI
NP_079124
PANK4
TNFRSF14
NP_877429
Q9NTK9
NP_997239
RPL22
BACH_HUMAN
NP_078930
TAS1R1
Y469_HUMAN
PHF13
DNAJC11
CAMTA1
PARK7
MIG6_HUMAN
RERE
ENO1
NP_115691
CTNNBIP1
NMNAT1
UBE4B
KIF1A
PGD
DFFA
PEX14
TARDBP
SRM
EXOSC10
FRAP1
NP_037451
AGTRAP
MTHFR
CLCN6
MFN2
NP_068752
PRDM2
Q9Y2G8
Q8N9F6
MINT_HUMAN
ZBTB17
EPHA2
ARHGEF19
NP_056424
NP_060560
NP_061185
NP_065816
PQLC2
Q96G68
NP_859070
NP_061054
NP_078820
DDOST
NP_057371
EIF4G3
NP_115640
USP48
HSPG2
Y478_HUMAN
AOF2
LUZP1
HNRPR
ZNF436
NP_612488
ID3
RPL11
LYPLA2
HMGCL
NP_065181
NP_835223
SRRM1
CLIC4
NP_997053
NP_996918
SMP1_HUMAN
NP_062457
NP_076942
PAFAH2
NP_690048
ZNF593
NP_073615
SH3BGRL3
DHDDS
ARID1A
NP_060307
SFN
NP_060536
NUDC
SLC9A1
NP_115501
MAP3K6
WASF2
G1P3
STX12
PPP1R8
RPA2
EYA3
DNAJC8
ATPIF1
SESN2
NP_060108
CHC1
Q9BXW3
TAF12
GMEB1
YTHDF2
NP_001003682
SFRS4
NP_057095
MATN1
PUM1
NP_004805
NP_057589
TDE2L
NP_036524
COL16A1
SPOCD1
PTP4A2
KHDRBS1
NP_060526
KPNA6
YL14_HUMAN
NP_077272
NP_061991
EIF3S2
HDAC1
NP_060515
NP_848642
RBBP4
AK2
DCOP_HUMAN
NP_689706
PHC2
NP_612437
ZNF258
ZMYM1
SFPQ
ZNF262
NP_872628
NP_055099
PSMB2
NP_689587
CLSPN
EIF2C1
EIF2C3
ADPRHL2
TRAPPC3
NP_060537
THRAP3
NP_078952
NP_114406
LSM10
NP_659484
MRPS15
SNI1_HUMAN
NGP1_HUMAN
NP_060320
CDCA8
NP_940848
SF3A3
FHL3
UT11_HUMAN
RRAGC
NDUFS5
Q8N214
PABPC4
PPIE
TRIT1
NP_116182
CAP1
PPT1
RLF
NP_073570
NP_075558
NP_073611
NP_689586
NFYC
CTPS
FOXJ3
ZMYND12
PPCS_HUMAN
PPIH
NSEP1
LEPRE1
NP_077002
ERMAP
NP_056995
SLC2A1
EBNA1BP2
MED8
PTPRF
JMJD2A
SIAT6
IPO13
ATP6V0B
B4GALT2
DMAP1
NP_060620
KIF2C
RPS8
PLK3
EIF2B3
UROD
TOE1
PRDX1
AKR1A1
NASP
NP_067652
NP_057570
MAST2
PIK3R3
RAD54L
MUF1_HUMAN
NSUN4
MOBKL2C
K494_HUMAN
SIL
KCY_HUMAN
FOXD2
FAF1
CDKN2C
RNF11
OSBPL9
NRD1
TL19_HUMAN
Q96K17
Q96JJ1
ORC1L
NP_116253
Q12764
NP_075565
NP_001004339
SCP2
CPT2
NP_060357
MAGOH
LRP8
NP_060557
NP_061855
C1orf41
C1orf8
MRPL37
TTC4
NP_689481
PPAP2B
NP_660286
JUN
NP_060761
NP_114416
NP_733750
USP1
APG4C
ALG6
ITGB3BP
PGM1
JAK1
LEPR
NP_115667
NP_065999
SLC35D1
Q9BTY3
GADD45A
NP_001002292
DEPDC1
NP_060238
SFRS11
NP_110443
CTH
ZNF265
NEGR1
FPGT
CRYZ
NP_612476
ACADM
RABGGTB
PIGK
AK5
ZZZ3
USP33
NEXN
FUBP1
PTGFR
LPHN2
NP_078962
PRKACB
NP_079341
GNG5
NP_932343
BCL10
DDAH1
CYR61
NP_060423
COL24A1
Q9ULJ1
SH3GLB1
SE15_HUMAN
LMO4
PKN2
GTF2B
NP_062556
GBP1
NP_115646
Q7Z766
NP_861446
CDC7
TGFBR3
BTBD8
NP_079089
RPL5
MTF2_HUMAN
CA00_HUMAN
DR1
BCAR3
NP_055412
GCLM
ABCD3
F3
CNN3
NP_659425
RWDD3
PTBP2
DPYD
SNX7
NP_055654
AGL
SLC35A3
HIAT1
NP_061956
DBT
RTCD1
CDC14A
EXTL2
SLC30A7
EDG1
AMY2B
SLC25A24
NP_060531
STXBP3
NP_055942
SARS
NP_001005290
PSMA5
ATXN7L2
CYB561D1
GNAI3
AMPD2
GSTM4
CSF1
AHCYL1
FAM40A
RBM15
HBXIP
NP_060842
NP_006081
ATP5F1
NP_945120
NP_061174
ST7L
CAPZA1
MOV10
RHOC
SLC16A1
LRIG2
NP_690864
PHTF1
AP4B1
DCLRE1B
HIPK1
OLFML3
BCAS2
NRAS
UNR_HUMAN
NP_079349
NGFB
CD58
TTF2
TRIM45
MAN1A2
FAM46C
GDAP2
WDR3
WARS2
PHGDH
NOTCH2
SEC22L1
PDE4DIP
NP_982283
TXNIP
RBM8A
GNRHR2
PEX11B
NP_653299
PIAS3
NP_899228
PRKAB2
CHD1L
BCL9
NP_056198
HIST4H4
NP_066403
HIST1H2AK
HIST1H2BN
YCE3_HUMAN
SF3B4
ZA20D1
VPS45A
NP_057358
ANP32E
AP1A_HUMAN
MRPS21
PRPF3
NP_056018
NP_079426
MCL1
ENSA
ARNT
SETDB1
LASS2
NP_060849
NP_067045
AF1Q_HUMAN
GABB_HUMAN
SEMA6C
NP_997716
SCNM1
PIP5K1A
PSMD4
NP_065883
PIK4CB
RFX5
PSMB4
POGZ
TUFT1
SNX27
MRPL9
NP_444283
S100A10
S100A11
S100A6
S100A2
NP_056422
SNAPAP
ILF2
NP_075391
NP_065750
SLC39A1
CREB3L4
RPS27
NP_997191
TPM3
NP_056264
Y144_HUMAN
HAX1_HUMAN
ATP8B2
IL6R
UBE2Q
ADAR
PMVK
PBXIP1
SHC1
CKS1B
NP_958800
ZFP67
EFNA4
NP_061333
MUC1
MTX1
Q9BWE2
GBA
C1orf2
NP_060586
NP_620831
NP_115668
RIT1
Q7Z7E9
ARHGEF2
SSR2
C1orf6
LMNA
NP_056142
NP_115699
NP_653181
CCT3
MEF2D
NP_056405
NES
NLEX_HUMAN
NP_057081
MRPL24
HDGF
ARHGEF11
ETV3
IFI16
TAGLN2
PEA15
WDR42A
PEX19
COPA
USF1
PFDN2
DEDD
CGC6_HUMAN
PPOX
B4GALT3
ADAMTS4
NDUFS2
NP_115550
SDHC
HSPA6
NP_001002901
DUSP12
ATF6
KIST_HUMAN
UAP1
DDR2
HSD17B7
RGS4
CDCA1
PBX1
MGST3
ALDH9A1
UCK2
POGK
POU2F1
MPZL1
BR44_HUMAN
GPR161
RPL34P1
ATP1B1
NME7
BLZF1
SLC19A2
NP_060656
NP_065156
KIFAP3
NP_689494
PRRX1
NP_055987
VAMP4
NP_055770
PIGC
C1orf9
PRDX6
KHLX_HUMAN
Q9H456
ZBTB37
RABGAP1L
CYBP_HUMAN
MRPS14
NP_001001740
NP_149118
SOAT1
NP_877498
NP_056417
NP_055625
NP_001004128
ACBD6
XPR1
STX6
IER5
GLUL
DHX9
LAMC1
Q9Y3U0
C1orf16
ARPC5
C1orf19
C1orf22
C1orf24
C1orf25
IVNS1ABP
TPR
RGS2
UCHL5
GLRX2
HRPT2
NP_919290
ZNF281
NP_982284
PHLDA3
TIMM17A
RNPEP
NP_054895
PPP1R12B
JARID1B
ADIPOR1
C1orf37
BTG2
NP_055642
SNRPE
PPP1R15B
MDM4
RBBP5
RIPK5
NUKS_HUMAN
RAB7L1
LGTN
Q86T63
MCP
PLXNA2
NP_689698
NP_055203
RCOR3
NP_116094
SLC30A1
NP_057532
PPP2R5A
ATF3
NP_653168
PTPN14
GPATC2
NP_057136
TGFB2
LYPLAL1
EPRS
NP_060368
HLX1
DUSP10
Q8N8M5
NP_073742
NP_653296
TP53BP2
FBXO28
DEGS
NVL
H163_HUMAN
WDR26
LBR
Q9Y5J4
NP_689821
H3F3B
CABC1
MRPL55
HIST1H2AE
NUP133
GALNT2
NP_116189
NP_689592
NP_114407
EXOC8
TSNAX
NP_115700
Q8TA88
IRF2BP2
TOMM20
ARID4B
GGPS1
TBCE
NP_689703
Q96CB2
BP28_HUMAN
MTR
GREM2
EXO1
NP_055627
ADSS
NP_057160
HNRPU
TFB2M
NP_689822
ZNF496
NP_085148
NP_079112
PGBD2
ZMYND11
PFKP
PITRM1
COPEB
GDI2
RBM17
PFKFB3
KIN
ATP5C1
TAF3
Q8NDZ9
UPF2
NUDT5
C10orf7
PHYH
PRPF18
FRMD4A
C10orf45
HSPA14
DCLRE1C
C10orf111
C10orf97
PTER
RSU1
VIM
STAM
ARL8
PLXDC2
NP_997254
COMMD3
BMI1
ARHGAP21
PRTFDC1
C10orf63
ABI1
Q9UPS8
YME1L1
ACBD5
RAB18
WAC
BAMBI
SVIL
PAPD1
MAP3K8
NP_877432
TCF8
ARHGAP12
KIF5B
EPC1
CCDC7
ITGB1
NRP1
PARD3
CREM
C10orf9
FZD8
ZNF248
ZNF25
ZNF33A
ZNF37A
NP_878249
Q9H5B2
ZNF11B
BMS1L
NP_061060
HNRPF
ZNF485
C10orf10
ZNF22
Q9UG79
Q8N0V0
ARHGAP22
C10orf72
ERCC6
CTGLF1
NCOA4
TIMM23
TMEM23
Q96MT0
PRKG1
CSTF2T
DKK1
ZWINT
C10orf70
UBE2D1
TFAM
CCDC6
CDC2
RHOBTB1
AR5B_HUMAN
C10orf22
NRBF2
JMJD1C
C10orf74
SIRT1
HNRPH3
ULA4_HUMAN
RUFY2
DNA2L
SLC25A16
CXXC6
CCAR1
DDX50
DDX21
KIAA1279
VPS26
HK1
AMID
TYSND1
SARA1
PP
ADAMTS14
SGPL1
CDH23
PSAP
CHST3
ASCC1
DDIT4
DNAJB12
CBARA1
C10orf42
P4HA1
SGT1_HUMAN
DNAJC9
ANXA7
PPP3CB
SEC24C
CHCHD1
VCL
AP3M1
ADK
SAMD8
COMTD1
ZNF503
RPC1_HUMAN
RPS24
RAI17
PPIF
C10orf56
GHITM
KIAA0261
BMPR1A
GLUD1
FAM35A
MINPP1
ATAD1
PTEN
C10orf59
NP_065850
TNFRSF6
LIPA
PANK1
MPHOSPH1
RPP30
RNF159
HECTD2
PPP1R3C
C10orf13
BTAF1
CPEB3
RNF153
IDE
KIF11
HHEX
FER1L3
C10orf4
C10orf117
HELLS
PDLIM1
ALDH18A1
C10orf61
CCNJ
TLL2
T9S3_HUMAN
ARHGAP19
FRAT1
FRAT2
KIAA0690
PGAM1
EXOSC1
ZDHHC16
MMS19L
AVPI1
MARVELD1
ZFYVE27
NP_055287
C10orf33
HPS1
GOT1
SLC25A28
ENTPD7
COX15
C10orf69
CHUK
CWF19L1
SCD
NDUFB8
HIF1AN
C10orf6
LZTS2
SFX3_HUMAN
KAZALD1
BTRC
NP_056263
SHFM3
MGEA5
Q7Z2U8
PPRC1
NOLC1
GBF1
NFKB2
Q9H469
ACTR1A
TRIM8
ARL3
C10orf26
AS3MT
CNNM2
NT5C2
TAF5
USMG5
PDCD11
OBFC1
SLK
C10orf78
GSTO1
GSTO2
KIAA1754
XPNPEP1
MXI1
DUSP5
CSPG6
PDCD4
GPAM
ZDHHC6
VTI1A
TCF7L2
CASP7
C10orf118
Q9HCH2
TRUB1
KIAA1598
PDZK8
CASC2
C10orf84
C10orf46
EIF3S10
PRDX3
GRK5
TIAL1
BAG3
INPP5F
C10orf119
SEC23IP
WDR11
ATE1
TACC2
PRSS11
CUZD1
C10orf88
C10orf89
ZNFN1A5
ACADSB
BUB3
OAT
KIAA0140
KIAA0157
NP_056423
BCCIP
MKI67
TXNL2
BNIP3
TUBGCP2
PAOX
NP_612393
BET1L
NP_068751
SIRT3
PSMD13
IFITM3
RNH
Q8N2Y7
DEAF1
NP_777600
TALDO1
RPLP2
NP_076436
TNNT3
TSSC4
CDKN1C
PHLDA2
CARS
NUP98
NP_055304
STIM1
RRM1
RNF137
TRIM5
NP_115503
Q8IV77
PRKCDBP
SMPD1
ARFIP2
FXC1
NP_056139
ILK
TAF10
CLN2
MRPL17
ZNF215
ZNF214
NALP10
EIF3S5
Q96C21
ST5
RAB6IP1
Q15055
ZNF143
WEE1
NP_055870
ADM
AMPD3
MRVI1
SH2BP1
EIF4G2
NP_067034
GALNTL4
USP47
MIL2_HUMAN
NP_116256
PARVA
TEAD1
NP_115696
Q8NEF7
MLSTD2
RRAS2
COPB
PSMA1
CYP2R1
SOX6
RPS13
PIK3C2A
NUCB2
Q7Z3M6
NP_612430
LDHA
TSG101
NP_060784
NP_919261
ZDHHC13
NAV2
HTATIP2
HRMT1L3
FANCF
NP_976249
Q9H2A6
LIN7C
BDNF
KIF18A
NP_689849
NP_689529
ZCSL3
ELP4
RCN1
NP_006351
NP_060863
CSTF3
HIPK3
CD59
FBXO3
M11S1
KG09_HUMAN
ABTB2
CAT
CD44
TRIM44
NP_777562
COMMD9
Q96H46
TRAF6
API5
TTC17
HSD17B12
NP_631917
NP_570139
CRY2
PEX16
CREB3L1
NP_060219
NP_776172
Y652_HUMAN
ZNF408
CTOG_HUMAN
ZNF289
DDB2
ACP2
MADD
SLC39A13
PSMC3
CUGBP1
NDUFS3
KBTBD4
MTCH2
FNBP4
NUP160
PTPRJ
TNKS1BP1
TIMM10
CFP1_HUMAN
ZDHHC5
NP_703151
CTNND1
LPXN
ZFP91
NP_942144
OSBP
NP_689929
MRPL16
NP_077003
PRP19
NP_076997
DDB1
NP_705839
NP_057548
NP_057583
NP_079087
SYT7
C11orf10
FADS1
FADS2
FTH1
Q8N204
EEF1G
RBM21
MTA2
GANAB
NP_077004
U33K_HUMAN
NP_776171
POLR2G
Q9NUU2
Q8WUC5
STX5A
NP_060563
SLC3A2
LR16_HUMAN
STIP1
FKBP2
NP_064540
ESRRA
U315_HUMAN
PRDX5
SF1
EHD1
O43154
PPP2R5B
SNX15
NP_037431
ZFPL1
C11orf2
ZNHIT2
NP_001988
SYVN1
DPO2_HUMAN
CDC42EP2
MAP3K11
RELA
HTATIP
CFL1
FIBP
FOSL1
NP_113638
SART1
NP_115701
NP_060496
RAB1B
YIF1
RIN1
MRPL11
DPP3
NP_997223
NP_060689
CCS
RBM14
RBM4
RBM30
RCE1
FBXL11
NP_997237
NP_037378
RAD9A
AIP
DOCR_HUMAN
GSTP1
NP_775849
NDUFV1
ALDH3B1
SUV420H1
C11orf24
LRP5
MRPL21
IGHMBP2
CCND1
ORAOV1
FADD
CTTN
RNF121
NUMA1
NP_060377
HP20_HUMAN
INPPL1
Q9H7Q5
ARHGEF17
TNFRSF19L
RAB6A
MRPL48
NP_057649
NP_079431
UCP2
POLD3
Q8NCN4
SP25_HUMAN
NEU3
ARRB1
RPS3
SERPINH1
UVRAG
Q8N9C3
C11orf30
GARP
NP_056331
CAPN5
PAK1
CLNS1A
HBXAP
NP_291025
NDUFC2
ALG8
GAB2
NP_078954
Q8N9C5
PRCP
RAB30
Q9NPX2
NP_872409
NP_068597
NP_060950
NP_115649
NP_067035
SYTL2
PICALM
EED
NP_057485
CTSC
NOX4
CHORDC1
SLC36A4
Q9C0D2
NP_077021
PANX1
MRE11A
NP_060174
FUT4
AMOTL1
NP_057487
NP_653265
NP_055494
MTMR2
JRKL
Q9P2H0
YAP1
BIRC2
NP_443164
NP_115675
Q96JK1
KBTBD3
AASDHPPT
CWF19L2
NP_620130
CUL5
ACAT1
ATM
NP_689800
Q9C0D7
RDX
FDX1
ARHGAP20
Q8N8E6
PPP2R1B
C11orf1
DLAT
NP_060665
TIMM8B
USP28
NNMT
RBM7
ORN_HUMAN
IGSF4
NP_116114
ZNF259
PAFAH1B2
SIDT2
TAGLN
NP_997226
NP_055771
UBE4A
ATP5L
ARCN1
PHLDB1
DDX6
BCL9L
NP_940891
RPS25
HYOU1
VPS11
HMBS
H2AFX
DPAGT1
TMEM24
NP_056332
NP_733840
MCAM
RNF26
MFRP
THY1
NP_848602
ARHGEF12
NP_689928
SC5DL
NP_116262
HSPA1A
NP_079045
Q9ULL9
ZNF202
LOH11CR2A
TBRG1
NP_733746
NP_078907
NP_079280
NP_982277
EI24
CHEK1
NP_659451
NP_116184
NP_078832
SRPR
NP_054745
KIRREL3
ETS1
FLI1
NFRKB
Q96N53
APLP2
NP_054874
ADAMTS15
SNX19
NTRI_HUMAN
OPCML
Y056_HUMAN
NP_443107
NP_054893
ACAD8
Q8TB43
JARID1A
NP_115734
PRKWNK1
RAD52
NP_829884
NP_689853
NP_060933
FOXM1
NP_113653
TULP3
TEAD4
TNE5_HUMAN
C12orf5
C12orf4
NP_006470
NDUFA9
NTF3
TNFRSF1A
LTBR
VAMP1
MRPL51
CND1_HUMAN
GAPD
CHD4
ING4
ZNF384
COPS7A
MLF2
PTMS
LEPREL2
CDCA3
TPI1
NP_116030
ENO2
C10_HUMAN
NEP1_HUMAN
NP_005759
C1R
SLC2A3
FOXJ2
NP_056324
Q9ULI2
M6PR
GABARAPL1
NP_060518
CSDA
TAS2R14
ETV6
LRP6
LOH12CR1
CREBL2
CDKN1B
DDX47
RAI3
HEBP1
Q8IXE5
Q9P261
EMP1
ATF7IP
H2AFJ
WBP11
EPS8
STRAP
MGST1
PLEKHA5
AEBP2
NP_079130
RECQL
C141_HUMAN
LDHB
ABCC9
CMAS
NP_055617
ETNK1
SOX5
C12orf2
BHLHB3
SSPN
NP_060634
FGFR1OP2
SURB7
STK38L
PPFIBP1
MRPS35
YD40_HUMAN
NP_057654
NP_114126
IPO7
Q9H8U1
C12orf14
NP_659410
NP_776163
BICD1
DNM1L
NP_057020
ALG10
Q8IXV1
PPHLN1
PRICKLE1
NP_112582
IRAK4
PTK9
NP_115632
Q8N3Q2
SFRS2IP
SLC38A1
SLC38A2
NP_078880
HDAC7A
VDR
SENP1
PFKM
NP_689533
NP_060292
CCNT1
CACNB3
DDX23
RND1
FKBP11
ARF3
PRKAG1
RHEBL1
NP_060583
TUBA1
TBA6_HUMAN
TROAP
SPATS2
MCRS1
TEGT
NP_859059
RACGAP1
SMARCD1
NP_116290
LASS5
EPLI_HUMAN
NP_954658
Q8NB38
ATF1
LETMD1
C12orf22
TFCP2
DAZAP2
NP_065200
SCN8A
GRASP
NR4A1
NP_068753
EIF4B
TENC1
NP_116229
CSAD
RARG
NP_116278
PFDN5
AAAS
SP1
PCBP2
TARBP2
ATF7
ATP5G2
CBX5
HNRPA1
COPZ1
BLOC1S1
CD63
DNAJC14
ORMDL2
NP_115721
CDK2
RAB5B
SUOX
ZNFN1A4
PA2G4
NP_056107
MLEY_HUMAN
MYL6
SMARCC2
RNF41
NP_076973
CS
TMEM4
USP52
TIMELESS
NP_997227
RBMS2
BAZ2A
ATP5B
TEBP_HUMAN
NACA
PRIM1
Y286_HUMAN
NAB2
STAT6
KA02_HUMAN
MARS
DDIT3
DCTN2
PIP5K2C
DTX3
OS9_HUMAN
SAS
CDK4
METTL1
NP_056248
CTDSP2
Q9Y6H3
LRIG3
SLC16A7
USP15
Q8NHE2
NP_787091
SRGAP1
NP_689653
XPOT
MAN1_HUMAN
HMGA2
NP_115714
NP_060918
MDM2
FRS2
CCT2
RAB3IP
NP_659419
THA2_HUMAN
TMEM19
PHLDA1
NAP1L1
NP_078961
OSBPL8
ZDHHC17
PAWR
PPP1R12A
NP_054886
NP_689801
Y373_HUMAN
KITLG
NP_758440
UBE2N
VEZA_HUMAN
METAP2
USP44
NTN4
PCTK2
SLC25A3
APAF1
O75183
GAS2L3
ARL1
NP_060840
NP_079474
CRY1
PWP1_HUMAN
SART3
NP_055116
SSH1
UNG
KCTD10
UBE3B
ATP2A2
NP_057385
RAD9B
ACAD10
NP_006691
DDX54
NP_116237
RBM19
TBX5
TBX3
FBXO21
RFC5
PBP
RAB35
RPLP0
COX6A1
15E1_HUMAN
DNCL1
Y152_HUMAN
RNF34
PSMD9
RSN
ZCCHC8
NP_937994
DENR
NP_078943
NP_689482
CDK2AP1
NP_065115
P24_HUMAN
GTF2H3
UBC
SLC15A4
RAN
SFRS8
PUS1
O75176
CHFR
ZNF140
MPP8_HUMAN
PSPC1
ZNF237
TTC10
LATS2
SAP18
MRP63
NP_689939
FGF16
MIPEP
SPATA13
PARP4
CENPJ
MTMR6
NUPL1
RNF6
CDK8
RPL21
RASL11A
NP_690876
LNX2
FLT1
C13orf12
NP_861450
SLC7A1
UBL3
KATNAL1
HMGB1
HSPH1
BRCA2
NP_149102
APRIN
STARD13
RFC3
SPG20
ALG5
EXOSC8
FAM48A
BM02_HUMAN
C13orf23
LHFP
COG6
MRPS31
ELF1
KBTBD6
KBTBD7
MTRF1
NP_078837
DGKH
AKAP11
EPSTI1
DNAJD1
NP_659411
TGFB1I4
NUFIP1
KIAA1704
GTF2F2
TPT1
COG3
KIAA0853
LRCH1
ESD
SUCLA2
NUDT15
VDRIP
ITM2B
RB1
FNDC3
CDADC1
CAB39L
PHF11
KPNA3
C13orf1
RFP2
Q7Z2U1
NP_078846
DDX26
Q96MY2
UTP14C
Q8IVV4
C13orf9
CKAP2
SUGT1
DIAPH3
TDRD3
PCDH9
NP_079084
KIAA1008
KLF5
KLF12
COMMD6
UCHL3
LMO7
CLN5
FBXL21
C13orf7
C13orf10
SPRY2
C13orf25
GPC6
TGDS
DZIP1
UGCGL2
MBNL2
RAP2A
TM9SF2
PCCA
TPP2
NP_620134
KDELC1
ERCC5
NP_060481
NP_060680
Q8N1R6
NP_078813
ING1
NP_848609
ANKRD10
TUBGCP3
NP_060856
LAMP1
RASA3
CCNB1IP1
PARP2
OSGEP
APEX1
NP
RNASE4
HNRPC
SUPT16H
CHD8
C14orf92
DAD1
ABHD4
OXA1L
MRPL52
MMP14
RBM23
SKB1
JUB
PSMB5
ACIN1
KIAA1443
BCL2L2
PABPN1
CNC0_HUMAN
THTPA
DHRS4L2
PCK2
NRL
WDR23
PSME2
RNF31
IPO4
TM9SF1
C14orf123
NEDD8
GMPR2
TINF2
DHRS1
C14orf21
NFATC4
KIAA0323
C14orf124
KIAA1333
SCFD1
AP4S1
HECTD1
C14orf126
ARHGAP5
C14orf11
BAZ1A
SRP54
C14orf24
C14orf10
KIAA0391
PSMA6
NFKBIA
MBIP
SLC25A21
MIPOL1
SEC23A
TRAPPC6B
PNN
CTAGE5
FBXO33
BTBD5
KIAA0423
FKBP3
KIAA1596
C14orf106
RPS29
PPIL5
Q86SZ0
RPL36A
MGAT2
KLHDC1
KLHDC2
SDCCAG1
ARF6
C14orf138
C14orf160
SAV1
PYGL
TXNDC
C14orf31
GNG2
C14orf166
NID2
PTGER2
PSMC6
STYX
GNPNAT1
PLEKHC1
DDHD1
CDKN3
GMFB
CGRRF1
SAMD4
SOCS4
C14orf32
LGALS3
FBXO34
KIAA0831
Q86SY8
KTN1
C14orf101
SEC10L1
C14orf108
ACTR10
PSMA3
Q8NE50
TIMM9
DAAM1
C14orf100
DHRS7
PPM1A
SIX1
SIX4
MNAT1
KIAA1393
SLC38A6
HIF1A
RHOJ
PPP2R5E
C14orf150
SGPP1
ESR2
MTHFD1
ZBTB1
HSPA2
CHURC1
FNTB
MAX
FUT8
GPHN
MPP5
ATP6V1D
EIF2S1
RDH11
ZFYVE26
ZFP36L1
ACTN1
ERH
SFRS5
C14orf112
RBM25
PSEN1
PTE2_HUMAN
PNMA1
C14orf43
ZNF410
COQ6
ENTPD5
ALDH6A1
ABCD4
HBLD1
DLST
NEK9
FOS
NP_443105
C14orf118
C14orf4
KIAA1737
C14orf133
AHSA1
C14orf156
SKIIP
GTF2A1
FLRT2
SPATA7
TTC8
PSMC1
C14orf102
CALM3
C14orf159
KIAA2010
FBLN5
TRIP11
NDUFB1
CPSF2
LGMN
GOLGA5
MOAP1
C14orf142
C14orf130
DDX24
PAPOLB
CCNK
YY1
WARS
Q96LZ5
WDR20
NP_116019
EIF5
MARK3
C14orf2
TUBGCP5
NP_112184
SNRPN
UBE3A
NDNL2
TJP1
NP_060232
NP_955389
C15orf24
C15orf29
NP_057538
AQR
NP_054825
NP_542381
NP_115888
MEIS2
NP_775882
NP_009154
SRP14
NP_997263
Q86XB4
IVD
C15orf19
NP_065113
RAD51
NP_060615
NP_060633
DLL4
NP_077016
NP_115572
CHP1_HUMAN
OIP5_HUMAN
NUSAP1
NDUFAF1
RPAP1
O60336
VPS39
NP_056312
SH3BP3
SNAP23
NP_694992
C15orf25
[truncated: 4,222 more rows]

## Sheet: essential
GBAP
MTHFR
ECE1
HSPG2
TGIF1
GLB1
MKKS
DNAH11
STK11
PDHA1
SLC37A4
DNMT3B
UBR1
CSF3R
GATA3
FGFR1
EDNRB
ASPA
ERCC5
PCCA
GALT
STAR
ZIC2
CTSD
NR0B1
PAFAH1B1
PTCH2
SMPD1
PLA2G6
AR
CYP7B1
TP53
ADA
HEXB
CRH
BMP15
PAX9
ACADVL
CTSA
MGAT2
ARSA
KISS1R
APC
SCNN1B
WT1
RET
NEU1
HSD17B4
HADHA
ACP2
MANBA
POR
ACADM
MPI
ASL
SIX3
SALL1
DCX
FCMD
FAH
BRUNOL6
DHH
PSAP
GPHN
FSHR
BMPR1B
LHCGR
CYP11A1
CYP11B2
INSR
NR5A1
GGCX
NR3C1
LIPA
F9
MOCS1
BBS2
DHCR7
ST3GAL5
NAGLU
EIF2AK3
GM2A
POLG
CPT1A
MTM1
PROK2
ZIC3
MAML1
LEP
ASS1
DLD
F8
ADAMTS13
PROC
MAN2B1
POMT1
PAX2
ATM
ADAMTS2
FOXL2
ITGB4
TBX5
MNX1
SLC25A19
PEX7
ACOX1
PRODH2
ITGA6
SOX9
GAA
CPS1
AGXT
CHRNG
GNPAT
DLL3
DMPK
FH
RPS19
GCLC
NFYA
CFTR
CYP51A1
KRIT1
HS3ST1
MAD1L1
M6PR
CYP26B1
CFLAR
TFPI
PLXND1
FKBP4
KDM1A
ARX
SLC4A1
CALCR
DVL2
UPF1
LIG3
CIAPIN1
CREBBP
KMT2E
MYCBP2
ITGA3
ZFX
CRLF1
DLX6
GTF2IRD1
SCN4A
PAX6
CACNA2D2
JARID2
TFAP2B
ADAM22
CELSR3
NFIX
PKD1
MED24
RPS20
REV3L
PAX7
BAZ1B
RANBP9
TCEB3
NME2
MKS1
ABHD5
MBTD1
ERCC1
EXTL3
PSMC4
PGM3
DDX11
TACC3
MDH1
COX15
ISL1
ATP2C1
IGF1
CNTN1
WWTR1
AGPS
ATP1A2
CYP24A1
SNAI2
HGF
NCDN
ADGRA2
MNAT1
RUNX3
MRE11A
NRXN3
GABRA1
RB1CC1
ALAS1
STRAP
UBR2
HSF2
RTEL1
PRKCH
VEZT
BCLAF1
ANK1
TFB1M
IKZF2
PNPLA6
IFT88
FUT8
UBA6
PIAS1
VCL
CUL3
OTC
CASR
FLT4
HOXC8
TLL1
TRIO
VCAN
CDH1
DNAH5
INPP4A
LCP2
ADRB1
CUL7
CTNNA1
EPHA3
HSPA5
DSG2
VPS13D
KITLG
LTBP1
ELN
FOXP3
BCAR1
RAD51
PIK3CB
ALX4
USE1
LAMA3
ARID4B
HHAT
KIF1B
FOXC1
GALC
KCNH2
CUL1
TAB2
KMT2C
MCOLN3
ZFR
PCGF2
PKP2
F7
PRDM1
ATG5
LAMC2
PPP1R12A
SLC2A3
WNK1
COL11A1
HDAC7
NCKAP1
GUCY1B3
DGAT2
POLD1
RNF4
CASP8
DLX3
NGFR
CDON
SLC12A2
DDX20
CALCRL
AP3D1
OAT
NTN1
MCM10
ERBB3
SPEN
MAP2K4
COL17A1
MTHFD2
CTNNA2
ELAVL1
TIE1
SPI1
FGFR2
KIF26A
ZFAT
FECH
KLF6
NEO1
CACNB1
PKM
DHX29
TRO
SYT1
ROCK1
CBFB
HYAL2
HDAC4
FGFR3
MEF2A
INPP5A
TTC7A
CYFIP1
KIF2A
IFT80
PITX1
NUP133
RORA
TGFBR3
NEDD4
MAPK6
GNB5
LRP6
IKBKAP
SPTB
FGF10
MNT
JMJD6
POLB
NDST1
CNGB1
CHAT
TCOF1
CDC42
ATP2B1
MAP4K4
WDR1
SNX13
SEL1L
TRIP13
ATP6AP1
TCF3
DAZAP1
MBD3
PDCD2
PRKACA
SPEG
TFRC
SREBF1
AFF4
MARK2
NFATC3
EVC
DERL2
AP1M1
IKBKG
XRCC1
SCARB1
MCM2
TP63
LLGL2
NLE1
KDM5A
FERMT2
PTGS2
GLI2
CLNS1A
TEAD2
TSG101
NUAK1
LMAN1
ENO1
SLC12A1
KCNQ2
SEMA3A
SEMA3C
CELSR1
FGF4
MARK3
FNDC3B
FOSL2
ACTB
DLG1
KIFAP3
MCM6
PTPN23
MLH1
TRAF4
XAB2
MAP2K7
DGKD
ACTL6B
TOP2B
GTF3C1
SIRT6
TYR
JADE1
UBE2A
GTF2I
FBLN1
ITGA8
ARAF
PIK3C3
TULP3
GNB1
EDN1
ADCYAP1R1
NRDC
CBFA2T2
TP73
RUNX1T1
THOC1
XRCC5
SENP1
FDFT1
KIF22
DNM2
RIMS1
KEAP1
RFX3
RIF1
SLC4A4
CPB2
CHRNA3
KCNN2
PSEN1
RBL1
MEF2C
PTPRC
CACNA1S
UBA5
LRP2
CCNT2
COL19A1
NFE2L1
GSK3B
ERC1
PALB2
KAT6A
GRHL2
PDS5B
OXCT1
CYLD
FAT1
ZMPSTE24
NOA1
REST
APLP2
APOB
ATRX
MECOM
MAP3K4
RRN3
CTTN
WNT11
ATG16L1
POMGNT1
B4GALT1
CHMP5
TMED2
HSD17B2
HUWE1
MTMR2
ACHE
SRRT
NLK
GNAO1
ADD1
GNAS
DNM1L
PTHLH
TFAP2C
AURKA
CNOT3
FKBP1A
SLC23A2
KDM2B
LHX5
TASP1
PXN
KIF16B
FUS
BIRC5
LTBP4
SLC9A1
SPTLC1
CCNK
MAEA
TFAP4
CHRD
EFNB1
GLG1
LAMB1
SLC26A3
TF
APOH
SLC17A6
ANGPT2
G2E3
HECTD1
HNRNPC
GEMIN2
TGM1
TINF2
TRPM7
SNAP23
TBX15
PHGDH
EZR
TGFB2
NUP50
CDC45
TMEM38B
PTGS1
SH2D3C
CYP26A1
HSP90AB1
DSP
SIRT1
JAK2
ABL1
CDC7
PCSK5
SCD
NRP1
HSD3B7
MTAP
SERPIND1
CRKL
CECR2
SMARCB1
CABIN1
SF3A1
PES1
MAPK1
PPM1F
CARD10
PLA2G3
HIRA
PATZ1
TRIOBP
SOX10
DDX17
CBY1
XBP1
SBF1
HMOX1
THOC5
PDGFB
TAB1
MYH9
TXN2
NCF4
RBX1
EP300
RANGAP1
PHF5A
BRD1
PRMT5
GNPNAT1
KIAA0586
DAAM1
SPTLC2
CHGA
HIF1A
DICER1
MTHFD1
TELO2
PSMC1
YY1
TRIP11
APEX1
ARHGAP5
CHD8
NFKBIA
REC8
PNN
GSS
PROCR
GINS1
IFT52
MYBL2
HNF4A
NDRG3
SALL4
ADNP
BMP7
RAE1
AVP
CHRNA4
ARFRP1
CSNK2A1
CDS2
PROKR2
FERMT1
PLCB4
POFUT1
KIF3B
JAG1
CHMP4B
SLC32A1
ASIP
CELF4
SMCHD1
SMAD7
LAMA1
MIB1
RBBP8
ALG13
GATA1
NALCN
KLF5
FGF9
SUPT20H
FLT1
INTS6
MGRN1
NFAT5
ZNF423
CTCF
PSMD7
VAC14
SMPD3
AXIN1
NPRL3
TSC2
LMF1
FOXF1
NARFL
CLCN7
STUB1
UBE2I
MEFV
DNAJA3
RBL2
RPGRIP1L
STX4
BCKDK
KAT8
CSK
OCA2
GABPB1
DNAJC17
SLC30A4
FZD3
EYA1
NBN
IMPAD1
IKBKB
JPH1
TRPS1
UBR5
TSTA3
ERI1
MCM4
ASAH1
GYS1
RELB
PPP1R13L
ERCC2
DOT1L
SLC17A7
NOVA2
FBL
GPI
PIAS4
FZR1
TGFB1
NAPA
ATP1A3
PTPRS
LIG1
RASIP1
BCAT2
PPP2R1A
KLF1
DNASE2
PRPF31
ELL
KMT2B
ETV2
USF2
LSR
FKBP8
SCN1B
ERF
PMPCB
NAMPT
ITGB8
SP4
DLX5
MET
WNT2
HOXA1
DNAJB6
HOXA2
HOXA3
LFNG
HOXA5
HOXA13
EVX1
TAX1BP1
CPVL
GRB10
STX1A
GARS
TAF6
WASL
AIMP2
MOSPD3
C1GALT1
PLOD3
NRF1
EZH2
MEST
MEOX2
AHR
CHCHD3
GLI3
RHEB
AEBP1
MYL7
GCK
FKTN
TGFBR1
LHX6
DNM1
ENG
RLN1
TYRP1
LHX3
DDX58
GLIS3
BAG1
RAPGEF1
SHB
ZFAND5
CXCL12
CUBN
ATE1
PLEKHA1
UNC5B
BMPR1A
FGF8
TNKS2
SUFU
MAP3K8
DKK1
EBF3
GLRX3
SHOC2
TFAM
ZMIZ1
GIT1
AATF
FBXL20
WNT3
RAD51C
KPNB1
PFN1
RAI1
SLC6A4
BLMH
CCDC47
MED31
DDX5
HNF1B
DHX58
KAT2A
CNTNAP1
COL1A1
PRKAR1A
YWHAE
DPH1
SLC9A3R1
IFT20
PMP22
FOXN1
PHOX2B
NFKB1
GAB1
WFS1
CLCN3
SLC2A9
FBXW7
WHSC1
NKX3-2
GLRB
RAPGEF2
KLF3
UGDH
PPARGC1A
DBX1
ZPR1
SC5D
EHD1
KMT5B
NRXN2
CCND1
CCDC86
PRPF19
CHORDC1
FOLR1
EIF4G2
UPK2
CBL
SLC1A2
AMBRA1
MADD
PTPMT1
SOX6
AIP
NUP98
TCIRG1
CHKA
SLC11A2
PTGES3
MYF6
MYF5
METAP2
ELK3
FOXM1
ARPC3
MYL2
CUX2
KCNA1
SCNN1A
CDK2AP1
TIMELESS
GAPDH
USP5
TPI1
ATN1
PTPN6
NANOG
SUDS3
PRKAB1
PHC1
RFX4
COL12A1
ASF1A
MCM9
FBXO5
PPARD
MAPK14
SRSF3
SOD2
MCM3
BMP5
RAB23
E2F3
SIM1
WASF1
ALDH5A1
GMNN
EYA4
PERP
ADGRG6
QKI
MDFI
TFEB
BYSL
TBP
PPP2R5D
PTK7
SRF
VEGFA
LAMA4
TBX18
SEMA5A
GHR
HBEGF
LOX
HMGCR
COL4A3BP
HAND1
GABRG2
LMNB1
NPR3
PDE4D
RAD50
NUP155
PPP2CA
LIFR
SMAD5
PDGFRB
BCL6
NPHP3
UBE3A
PDCD10
WNT5A
COL7A1
HES1
ECT2
GNAI2
RPL24
FXR1
IFT57
GBE1
ACVR2B
VIPR1
SSR3
FOXP1
ADAM23
TTL
PIKFYVE
ACTR3
EPB41L5
TFCP2L1
POMC
GPD2
CENPA
ACVR1
ITGA4
PPM1G
TLX2
SPTBN1
RTN4
ACADL
FANCL
FN1
STAT1
GLS
OTX1
SF3B1
SMYD1
MLPH
SLC5A7
ID2
ODC1
BIRC6
SLC25A12
DLX2
SOS1
RND3
ATF2
TIA1
EPAS1
ARID3A
SUMO1
SPR
PRRX1
DHCR24
NPHS2
ICMT
STXBP3
ERRFI1
WDR77
RAP1A
HDAC1
LAMTOR2
DNAJC6
IVNS1ABP
MFN2
SLC35D1
WLS
UCHL5
ZBTB17
NR5A2
MTR
BMP8B
RGS4
HMGCL
PRPF3
APH1A
SLC2A1
CDC20
F3
IRF6
SERPINC1
PROX1
ARID1A
PPP1R8
KMT2A
TNNT2
NRP2
CREB1
KLF7
ELOVL4
CNR1
PLAGL1
TNFAIP3
MYB
ARG1
CTGF
TCF21
FBXL5
VAMP8
DCLRE1B
PKD2
SATB2
TRPM6
TJP2
ITGB1BP1
RAD23B
MAPKAP1
NR4A3
INVS
VSX2
LTBP2
TGFB3
ESRRB
DNMT3A
BCL11A
CRIPT
EPCAM
SLC17A5
NKX2-3
PPP1R3C
HELLS
GNA13
HOXB3
HOXB1
TEK
GRIA2
WDR55
MRC1
EPC1
ALG5
SIL1
SERP1
APAF1
TARDBP
COPS5
RDH10
SPOP
TBX2
TBX4
ADCY7
TSHZ3
LHX4
RNF2
DPPA4
MAPK8IP1
KHDRBS1
PIK3CA
PDS5A
LIAS
CXCR4
ACVR2A
MTERF4
TBX22
MYOG
RBBP6
LDB3
INHBA
TWIST1
RECK
ACO1
CNTFR
CALD1
NEUROG3
BICC1
EGR2
ECD
P4HA1
VPS26A
RBM19
CIT
WDR83
ATP7B
NEUROD4
HOXC13
CDK2
LRP1
NFE2
DBH
STIL
COL10A1
AMD1
PLP1
NRK
KCNJ2
AGO2
SLC12A5
NCOA3
PLCG1
ARFGEF2
EDN3
CSE1L
SNAI1
PCK1
STAMBP
SPDEF
SOX4
SSR1
EEF1E1
RUNX2
GCM2
WNT1
EFNB2
BMP4
PAX8
POLR1B
MED1
FOXA2
NKX2-2
BMP2
FLRT3
OVOL2
ITPA
TCF15
S1PR4
CITED1
MAX
EIF2S2
PLAGL2
AMOT
UROD
F10
PCID2
CAPNS1
THRA
PRMT1
SBDS
STAT5A
BECN1
NSRP1
SIX1
NUP214
AVPR2
CANX
IPPK
BCL11B
TRAF2
RAP1B
PTPRB
FGFRL1
UBR4
SIN3B
KLF2
MACF1
SMARCA4
HIP1
PTPN12
FGL2
SRD5A3
KDR
DGCR8
ATF4
LIF
POT1
VGF
PODXL
FOXP2
FLNC
SMO
FEZF1
HOXD3
GAD1
HOXD11
HOXD13
HERC2
SNRPN
TWSG1
EIF2AK4
TTBK2
DLL4
ALDH1A2
MBD4
PALLD
CSRP3
ATP1B2
ILF3
FOXA1
DAD1
FOXJ1
ASH2L
CDKN1C
SYT5
TNNI3
GAMT
ECSIT
GDF1
KIF1A
MLLT1
MLLT4
ACTN4
EPO
UNC13A
SCO2
LSM4
COL5A1
HBZ
PAK4
TAF4
LAMA5
ADRM1
TRIM28
ANGPTL6
DNMT1
DUSP9
SLC7A10
UBE4B
SYNE1
LATS1
RBM39
SLC34A1
NFATC1
RLIM
ABCB7
TRAF3
CAPN7
KIF3A
MGAT1
TUBG1
ACLY
RAMP2
EXOC4
ANO1
BARX1
MAP1B
RARA
PEX11B
LLGL1
LIN28A
RFX1
CC2D1A
LHX1
ACACA
RAF1
SLC6A11
PPARG
HSD17B7
INPP5K
RPA1
DDC
ANKRD17
KDM6B
DLG4
TERF2
SNAP25
PCNA
DAP3
NES
NASP
AP3B1
CASP9
CDK8
MYH10
POSTN
TPT1
MYH11
LARGE
MYO18B
KRAS
SPINK5
IMPA1
MEN1
GSC
UNC79
NUMB
EIF2S1
CCNB1
VHL
NOTCH2
NGF
PPHLN1
YWHAQ
KIDINS220
ROCK2
MYCN
LPIN1
LDHA
SAA2
IL6ST
FST
CDC73
CRB1
RAX
SOX5
LRP4
SOX3
CDCA8
DSG3
DSC3
APLNR
PDGFRA
COL4A2
ETS1
WDR36
RFK
CTSL
ADAM19
HNF1A
TBX3
DMTF1
PNPLA8
RINT1
AKIRIN2
MAP3K7
LMO2
PHF21A
ELF5
CAPRIN1
AVIL
GDF11
ITGA7
CDK4
ESPL1
ACVR1B
AHI1
HEY2
MDM2
AGT
EGLN1
GLUL
DHX9
LAMC1
PAX3
HTR2B
REV1
EDAR
FLNB
LMO7
SPRY2
TNS3
RAC1
HUS1
DBNL
CCM2
NKX2-1
NMT1
SRSF1
VEZF1
KAT7
TRA2B
SCN2A
TBR1
GATA4
SKIL
HLX
CFC1
BIN1
HS6ST1
ABI1
TXN
ODF2
KLF4
TOR1A
TMOD1
STXBP1
SLC2A8
CDK5RAP2
SLC31A1
XPA
ANP32B
LMX1B
ENPP2
MYC
NOV
IL11RA
TLN1
CNPY3
FOXP4
TFAP2A
GCM1
FOXF2
RIPK1
CLPS
TAF8
NUMA1
NEK1
YAP1
MAP2K5
THBS1
NUSAP1
CASC5
SMAD6
ADAM10
DBT
IFT172
ADCY3
PPM1B
PNPT1
DYNC2LI1
FBXO11
LBX1
KIF11
ARL3
EXOC6
ANXA7
TIMM23
BARD1
SSB
CHRNA1
ITGAV
SLC40A1
COX17
USP8
GLCE
HCN4
PCDH10
FRAS1
SHROOM3
CENPE
LEF1
SEC24B
MTTP
MAPK8IP3
ETV6
AEBP2
PRICKLE1
VAMP1
PEX5
COL2A1
LGR5
DUSP6
ASCL1
TDG
FOXN4
SLC7A1
PDX1
TARBP2
ACVRL1
BRCA2
MAP3K12
RB1
ZIC5
CUL4A
NOVA1
TCF12
CDAN1
TLE3
TPM1
IGF1R
BBS4
PCSK6
CYP1A2
NTRK3
FURIN
PMM2
FTO
MBTPS1
PDPK1
NCOR1
COPS3
MYOCD
UNC45B
VPS53
NPEPPS
PTRH2
SS18
AFG3L2
GNAL
GALNT1
ADCYAP1
MEP1B
GATA6
CCDC40
CSNK1D
RPTOR
SMAD4
PIP4K2B
ERBB2
CACNA1A
BRD4
VAV1
DNMT3L
AKT1
CARM1
RERE
PRDM16
PEX14
PLK4
WDTC1
BCL10
CYR61
LMO4
BARHL2
MTF2
GJA5
POU2F1
PFDN2
TOR1AIP1
SNX27
SETDB1
ARNT
DTL
TP53BP2
S100A8
TPM3
SNAPIN
ILF2
FLG
ACTA1
LEFTY2
PARP1
LBR
WNT9A
REN
SYT2
OSR1
VPS54
ASXL2
MEIS1
SNRNP200
SLC20A1
SCN1A
KIAA1715
DLX1
UBR3
HSPD1
ABCA12
SUMF1
ACKR3
FANCD2
CSRNP1
ITGA9
SLC25A26
UBA3
NFKBIZ
LPP
VPRBP
SLIT2
CENPC
ANK2
CCNA2
SETD7
PDGFC
PLK2
PIK3R1
HAPLN1
SSBP2
RASA1
PAM
BTF3
CXCL14
GLRA1
TNIP1
G3BP1
MUT
PHIP
RSPO3
WTAP
CREB5
EGFR
NCAPG2
CASK
HDAC8
LPAR4
EBP
HTR2C
GPC3
MCPH1
NSDHL
SLC25A37
TERF1
RSPO2
SLC39A4
NFIB
NTRK2
UGCG
GSN
NR6A1
CRB2
SURF1
INPP5E
NOTCH1
CACNA1B
PARD3
ZEB1
A1CF
VAX1
TCF7L2
CYP17A1
ADAM12
RGS10
ADM
HSD17B12
SSRP1
PTPRJ
CELF1
C11orf73
TENM4
SERPINH1
CAPN5
NCAM1
LAMTOR1
ST14
HYOU1
CSRP2BP
MTA2
INCENP
CHEK1
JPH2
FERMT3
PLCB3
TBX6
PPP4C
GRIN2B
ITGB1
ARID5B
LATS2
VEGFC
DOCK1
PTS
FREM2
FOXO1
CRIM1
UBC
ITPR1
CACNA1C
IPMK
RAD9B
AKAP6
NPAS3
EXT2
MSGN1
NEK7
UPF2
EDNRA
NR3C2
ADAM17
FLI1
KCNJ1
SAV1
GABRA2
GFRA1
DST
TIAL1
BAG3
SCHIP1
POU4F1
GRID2
TCF7L1
XRCC4
ZFP36L2
PFKM
SPEF2
GJA1
PELO
HHEX
RAD17
MED21
ZIC1
DAB2
BCL2L11
SMARCA5
HNRNPU
RANBP2
AHCTF1
NR4A2
RBMS1
SCN3A
LPCAT1
UBP1
CEBPG
LGI4
DDAH1
HS2ST1
MSI2
ROBO3
ANGPT1
WNT3A
BUB3
PDLIM3
CXADR
RABGEF1
GABPA
ADAMTS1
CCDC174
FLCN
DPH3
CXXC1
AZIN1
MARCKS
DBI
SLC7A7
TTN
PPARGC1B
GRIP1
KIF5A
GNAQ
ADK
N6AMT1
USP16
FGF18
GDF6
MTERF3
SUPV3L1
NODAL
KAT6B
AIFM1
BUB1B
NRG1
PAXIP1
SSBP3
MMP14
KIT
HYDIN
RNF111
CCNB2
MYO1E
DYRK1A
KCNJ6
ERG
ETS2
BRAF
SLC34A2
ACAN
WDR19
SKI
GRHL3
XDH
WASF2
NRG2
B4GALT5
ALAS2
PPP1R15B
PKD1L1
F11R
EDA
WNT9B
SYNJ1
SV2A
RUNX1
IGF2BP1
ACTC1
MORC3
SIM2
SCUBE1
PSMD4
HK2
ISL2
ACE
CTBP1
ATP6V0D1
AGRP
NPR2
GNE
ARHGAP35
PTGIR
PKNOX1
CBS
G6PD
ITGB2
MCM3AP
SAFB
SHC1
ADAR
PTH1R
LY6E
FOXH1
DVL3
AP2M1
PCYT1A
NPHS1
SRSF2
ITGA5
ZNF385A
AQP5
RACGAP1
CCNF
RPL29
SYVN1
LRP5
FGF19
TAL1
MAGOH
BSND
PLPP3
JAK1
PDPN
ALPL
WNT4
NFIA
USP1
LHX8
VCAM1
NCSTN
VANGL2
LMX1A
FLVCR1
RBM15
KIF26B
PKDCC
CAPN2
PEX13
NEUROD1
H3F3A
EN1
INHBB
XIRP2
SMARCAD1
MSX1
ERCC3
BMP10
FZD5
NPPC
ALPP
CLDN1
PYGO2
POGLUT1
ATP1A1
FSTL1
ELF3
CCT3
STK36
FEV
IHH
EOMES
TGFBR2
NFASC
NUAK2
SPTA1
PRKCI
SLC2A2
CADPS
NKX6-1
ADAMTS9
PPM1K
TIPARP
HESX1
TOPBP1
RYK
ZNF148
SENP2
IFT122
TKT
GNL3
PBRM1
LRPAP1
H2AFZ
CDC25A
SPRY1
INTU
MST1R
RAD54L2
PITX2
HAND2
MAD2L1
HPGD
HHIP
ABCE1
NIPBL
F2RL1
SPINK1
HTR4
CASP3
RICTOR
FOXQ1
CSF2
SLC35A1
TLX3
CITED2
T
STXBP5
TBX20
CAMLG
BMPER
KCNK5
SP8
SHH
COL1A2
LMTK2
SOX17
DLC1
PEX2
RAD21
TNFRSF11B
DEFB1
UNCX
NOS3
INTS1
CDK5
SLC4A2
OSR2
FREM1
TMEM67
PSIP1
SYK
ABCA1
FXN
PIGA
STRBP
ATP7A
VCP
WRN
TSHR
INPPL1
PHOX2A
GJB2
ARF6
TTC8
CDX2
OTX2
DRGX
DACT1
SLC18A2
DACH1
NSD1
CLEC1B
TSC1
GFI1B
PSMC3
RAPSN
SLC6A5
NELL1
CACNB2
JAM3
AMN
SPINT1
FBN1
POLL
COPS2
GABRB3
SPIC
FRS2
TMEM100
ILK
TAF10
TPP1
DCHS1
RPL27A
ATMIN
WEE1
MAPK7
MCM7
TK2
NDEL1
HSP90B1
AP1G1
KIF7
MESP1
SCNN1G
TERF2IP
PLK1
SCG5
GREM1
PDIA3
PBX3
PHB
SLC27A4
ENDOG
ISLR2
SP2
COQ7
GPRC5B
CRK
IGF2
STIM1
CA4
GPX4
ANKRD11
AQP2
TTYH1
SPINT2
CHAF1A
NXN
KRT1
ANGPTL4
TBX10
TK1
CYP7A1
MLST8
E4F1
ABCA3
DDB1
FTH1
SLC3A2
C2CD3
RPSA
CTNNB1
FADD
SF1
COPS6
RBPJ
PTF1A
FOXI1
BMI1
THAP11
BDKRB2
BMP1
FEN1
GBX2
MYL1
COL3A1
STAT3
GDNF
AXIN2
LRP1B
SEMA4C
TET2
SHOX2
ATOH8
SFTPB
MAP2K1
IRS1
ROR2
MN1
RGS14
B3GALNT1
CRADD
SIN3A
ARL13B
PTK2
PTPN9
SCN9A
ZEB2
LUZP1
BUB1
SPNS1
AGPAT2
FASN
CNBP
RFNG
[truncated: 6,253 more rows]

## Sheet: kinase
AKT1
AKT2
AKT3
CRIK
DMPK1
MRCKa
MRCKb
DMPK2
ROCK1
ROCK2
BARK1
BARK2
GPRK4
GPRK5
GPRK6
RHOK
GPRK7
MAST1
MAST3
MAST2
MAST4
MASTL
LATS1
NDR1
NDR2
LATS2
PDK1
PKACa
PKACb
PKACg
PRKX
PRKY
PKCa
PKCb
PKCg
PKCd
PKCt
PKCe
PKCh
PKCi
PKCz
PKG1
PKG2
PKN1
PKN2
PKN3
MSK2
MSK1
p70S6K
p70S6Kb
RSK3
RSK1
RSK2
RSK4
RSKL1
RSKL2
SgK494
SGK1
SGK2
SGK3
YANK2
YANK1
YANK3
ADCK3
ADCK4
ADCK1
ADCK5
ADCK2
AlphaK1
AlphaK3
AlphaK2
ChaK1
ChaK2
eEF2K
BCR
BRDT
BRD2
BRD3
BRD4
FASTK
G11
H11
BCKDK
PDHK1
PDHK2
PDHK3
PDHK4
ATM
ATR
DNAPK
FRAP
SMG1
TRRAP
RIOK1
RIOK2
RIOK3
TAF1
TAF1L
TIF1a
TIF1b
TIF1g
CaMK4
CaMK1a
CaMK1d
CaMK1g
CaMK1b
CaMK2a
CaMK2b
CaMK2d
CaMK2g
AMPKa1
AMPKa2
BRSK2
BRSK1
CHK1
HUNK
LKB1
MARK2
MARK1
MARK3
MARK4
MELK
NIM1
NuaK1
NuaK2
PASK
QIK
QSK
SIK
SNRK
STK33
VACAMKL
CASK
DAPK1
DAPK3
DAPK2
DRAK2
DRAK1
DCLK1
DCLK3
DCLK2
MAPKAPK3
MAPKAPK5
MAPKAPK2
MNK2
MNK1
smMLCK
TTN
skMLCK
caMLCK
SgK085
PHKg1
PHKg2
PIM1
PIM2
PIM3
PKD1
PKD3
PKD2
PSKH1
PSKH2
CHK2
SgK495
Trb1
Trb2
Trb3
Obscn
SPEG
Trio
Trad
TSSK2
TSSK3
TSSK1
SSTK
TSSK4
CK1a
CK1a2
CK1d
CK1e
CK1g2
CK1g3
CK1g1
TTBK1
TTBK2
VRK1
VRK2
VRK3
CCRK
CDC2
CDK2
CDK3
CDK10
CDK4
CDK6
CDK5
CDK7
CDK8
CDK11
CDK9
CHED
CRK7
PCTAIRE1
PCTAIRE2
PCTAIRE3
PFTAIRE1
PFTAIRE2
PITSLRE
CDKL5
CDKL1
CDKL2
CDKL3
CDKL4
CK2a1
CK2a2
CLK1
CLK2
CLK3
CLK4
DYRK1A
DYRK1B
DYRK3
DYRK2
DYRK4
HIPK3
HIPK2
HIPK4
HIPK1
PRP4
GSK3A
GSK3B
Erk2
Erk1
Erk4
Erk3
Erk5
Erk7
JNK1
JNK2
JNK3
NLK
p38a
p38b
p38d
p38g
MAK
MOK
ICK
SRPK1
SRPK2
MSSK1
AurA
AurC
AurB
BUB1
BUBR1
PRPK
CaMKK2
CaMKK1
CDC7
Haspin
IKKa
IKKb
IKKe
TBK1
IRE1
IRE2
KIS
MOS
AAK1
BIKE
GAK
MPSK1
NEK1
NEK3
NEK5
NEK10
NEK11
NEK2
NEK4
NEK6
NEK7
NEK9
NEK8
SBK
SgK069
SgK110
PINK1
SgK269
SgK223
CLIK1
CLIK1L
SgK307
SgK424
NRBP1
NRBP2
RNAseL
SgK396
SgK196
GCN2
HRI
PEK
PKR
PLK1
PLK3
PLK2
PLK4
SCYL2
SCYL3
SCYL1
SgK071
SgK493
SgK496
Slob
TBCK
TLK1
TLK2
PBK
TTK
Fused
ULK1
ULK2
ULK3
ULK4
PIK3R4
Wee1
MYT1
Wee1B
Wnk1
Wnk4
Wnk3
Wnk2
HSER
CYGF
CYGD
ANPa
ANPb
MAP3K5
MAP3K6
MAP3K7
MAP3K1
MAP3K8
MAP3K3
MAP3K2
MAP3K4
OSR1
STLK3
GCK
KHS2
KHS1
HPK1
HGK
TNIK
NRK
MINK
MST2
MST1
MYO3A
MYO3B
PAK1
PAK2
PAK3
PAK4
PAK6
PAK5
LOK
SLK
STLK6
STLK5
TAO2
TAO3
TAO1
MST3
YSK1
MST4
MAP2K1
MAP2K2
MAP2K3
MAP2K6
MAP2K4
MAP2K5
MAP2K7
COT
NIK
ABL1
ABL2
ACK
TNK1
ALK
LTK
AXL
TYRO3
MER
CCK4
CSK
CTK
DDR1
DDR2
EGFR
ErbB2
ErbB3
ErbB4
EphA2
EphA1
EphA3
EphA4
EphA5
EphA7
EphA8
EphB1
EphB2
EphB3
EphB4
EphB6
EphA10
EphA6
PYK2
FAK
FER
FES
FGFR1
FGFR3
FGFR2
FGFR4
IGF1R
INSR
IRR
JAK1
JAK2
JAK3
TYK2
LMR1
LMR2
LMR3
MET
RON
MUSK
FMS
FLT3
KIT
PDGFRa
PDGFRb
RET
ROR1
ROR2
RYK
ROS
FRK
FGR
FYN
SRC
YES
BLK
HCK
LCK
LYN
BRK
SRM
SYK
ZAP70
BMX
BTK
ITK
TEC
TXK
TIE2
TIE1
SuRTK106
TRKA
TRKB
TRKC
FLT1
FLT4
KDR
IRAK1
IRAK2
IRAK3
IRAK4
LIMK1
LIMK2
TESK1
TESK2
LRRK1
LRRK2
HH498
ILK
DLK
LZK
MLK1
MLK2
MLK3
MLK4
TAK1
ZAK
KSR1
KSR2
ARAF
BRAF
RAF1
RIPK1
RIPK2
RIPK3
ANKRD3
SgK288
ALK2
ALK4
ALK1
BMPR1A
BMPR1B
TGFbR1
ALK7
ACTR2
ACTR2B
MISR2
BMPR2
TGFbR2
MLKL

## Sheet: drug target
CDK7
ADORA2A
FGFR2
APOE
CYP2E1
PDGFRB
MTOR
DNTT
OPRM1
PIK3R2
SIGMAR1
HRH4
FGFR1
ATP4A
IGF1R
IDH1
NOS2
F2R
ATP1A1
ADRB2
CACNA1F
HTR1A
HDAC5
IL10
AR
COL6A6
GNRHR
SCN11A
GADD45A
DRD4
IL2RA
KDR
KRAS
MTNR1B
MGMT
BAX
CACNB4
DPP4
ADRA1B
PTGER2
ALK
MTTP
VEGFA
TUBA3E
PTGER4
CACNA1I
CHRM2
GABRE
SLC6A4
VHL
DRD2
PRKCB
SSTR4
JAK2
MMP2
AGTR1
PDE4C
FLT1
NOS1
FPR1
CDKN2A
TNF
HDAC11
PDGFRA
TPMT
MTNR1A
TRPM3
LIPC
DHFR
ADRA2A
CTLA4
GABRR1
TUBA1A
GGCX
NAT1
SLC6A2
LTB4R
SCN4A
MAP2K1
CLCN2
PPARG
GRIN2A
PDE4B
CCR2
GFAP
PIK3R1
GCGR
ABL1
NQO1
GRIA4
CA1
LHCGR
CHRNA10
HTR1D
PRKCE
HDAC8
SLC18A1
CHRM1
NTRK1
CCR5
HDAC4
CSNK2A1
DRD3
FCGR3A
MAPK11
ABAT
P4HTM
AVPR2
GABRR2
ABL2
PPARA
GRIN3A
TXK
PIK3CG
NR3C1
CYP1A1
PTEN
MSH6
TUBB1
CYP3A43
ADRA1A
MS4A1
GRM1
DDIT4
SCN5A
P2RY6
PIK3R3
GSTP1
GABRQ
PTGS1
GABRA5
GABRA1
PIK3CA
CPT2
WNK1
IL2
FSHR
ALOX5AP
RXRG
PRSS2
HRH1
PIK3CB
KCNQ1
RPS6KB1
BDNF
CTNNB1
GRM7
UGT1A1
GABRA3
ITGB2
PAH
SMO
GRIN2D
RRM2
CSF2RA
IFNG
EDNRB
IL2RG
PTGES3
CCR3
F11
BCL2
NPR1
SSTR3
DRD5
ADRB1
NDUFB2
TNFSF13
FLT3
PSMB4
KIT
NR3C2
SI
PSMB2
TRPC5
ATP2A1
CDK8
HPSE
CASP9
MAOA
HTR2A
KCNJ11
NPEPPS
PTGER3
GRIN3B
GRIA1
HTR6
SLC2A1
FGF2
BACE2
C5AR1
CHRNA2
FHIT
GABRB2
NAT2
PIM3
PROKR1
P2RX7
EGFR
ATM
OPRK1
AKT1
GABRB1
PLG
ITPR2
GNAQ
CD3G
TGM2
PDE3B
GALR3
BRAF
ADRA1D
GABRA4
MAPK1
MPO
ARAF
GRP
CCL17
PSMD14
CYSLTR2
STAT1
VDR
HCRTR1
SSTR1
PTHLH
PIK3CD
SLC1A6
GRM3
KCNJ4
SYT2
CA2
IFNAR2
RET
AVPR1A
MT-ND4
CDK2
ATP7A
QRFPR
GRIN2C
PTGS2
ERBB2
HDAC3
TUBB2B
APEH
GABRG1
CA12
BTK
GABRG3
STK11
TRPM7
CP
PALB2
RXRA
EDNRA
OXER1
ITGB1
ANXA1
MT-ND2
VCAM1
TRPM2
CCR4
ADORA3
FLT4
CDKN1A
CRHR2
DKK1
HTR3D
HNF4A
SSTR2
NRIP1
PSEN1
ADORA1
GABRD
HTR1B
EPHA2
PIK3C2G
CD6
CFTR
LPL
CHRNA7
ADORA2B
ACE
IL1A
SRC
DDIT3
CDK1
MMP9
IL17A
TUBA1C
SCN9A
TUBB8
GUCY1B2
APOA1
EIF2B1
GPR17
MAP2K2
TNFRSF8
LOH19CR1
KCNK9
PIK3R6
CCKAR
SOST
GJD4
ZACN
TAC1
CCKBR
PLA2G4A
CKM
MCHR1
YES1
C1S
VIPR1
HDAC7
GABRB3
TEK
TAAR1
NPM1
TP73
PCSK6
HRAS
PLAUR
BDKRB1
FOLH1
PIM2
GRM4
ASXL1
ACE2
MUC1
SERPINC1
PDE4A
GRM6
PDE4D
OSGIN2
POLB
ME3
PTGIS
IL12B
VIPR2
ERBB3
IRAK1
PRKCG
SLC1A1
PNP
S1PR2
FFAR1
GABRA6
ACHE
GABRR3
KMT2A
F10
PLAU
GABRP
OPRD1
SLC12A3
IDO1
TFPI
APOC3
MT-ND1
TSHB
KCNB2
TRPV5
SERPINE1
SLC6A9
FYN
VIP
C6
PRKG1
SCN1A
CHRNA4
CSF1R
ASIC1
ATRX
KCNJ5
DMD
TYK2
SCN10A
MPL
ABCB4
ATIC
JAK1
DGAT1
AKT3
RXFP3
PIK3C2B
GHRHR
PIK3C3
HCK
ADCYAP1R1
GRIA2
ABCB1
SLC6A3
TOP2A
BRD9
BRD4
CHRM4
CASP5
PTGDR2
USP9Y
MAOB
TBXA2R
UGT1A4
FRK
CSF2
RXFP4
SSTR5
KCNA1
SLC29A4
INSR
PSMD2
IL6R
SLC2A4
EPHA1
SCN3A
ERBB4
CYP19A1
CHEK1
B4GALNT1
FPR2
CDK9
NTSR1
PADI4
CHRNG
PRL
RXFP2
P2RY11
MAPK9
KCNC2
PROKR2
RTN4
GALR2
TSHR
MAGEA1
DHODH
CD74
CD3D
GABRG2
ICAM1
TGFBR3
HGF
HIF1A
CACNA1C
TRPC6
JAK3
LCK
OPRL1
CAMK2B
PTH1R
SELP
RARA
GGPS1
TRPM8
FFAR4
P2RY12
PIM1
CD80
HTR3B
KLK3
TSPO
CHRNB2
HCAR2
GABRA2
AURKB
NPY2R
DYRK3
MTHFR
BRD3
NDUFB6
GRIN1
PDE7B
CASR
ANO1
HTR2B
AXL
PRMT3
BIRC5
HDAC9
KCNK2
TYMS
CD274
ABCC9
SLC1A3
ADSS
FBXW7
BCL6
EPOR
BGLAP
KCNK4
TYRO3
CSF3R
CYSLTR1
TRPV1
ITGAV
TFF3
PTH
APLNR
TNC
F9
CLK1
ADRA2B
ODC1
CIC
IL1B
MC2R
CYP3A5
GNRH1
SERPINA3
CYP27A1
KCNH2
CHRNA6
TLR7
NDUFB9
CCND1
CRBN
HRH3
GABBR1
KCNA3
PRKCH
PSMC2
FOLR1
TACR1
SLC12A1
RAF1
GGT1
CHRNA9
PSMA2
KDM2A
ENTPD2
CNR1
DDR2
GPR119
ASIC2
TUBB3
AURKA
GPER1
DRD1
CHRM3
BIRC3
MICA
F2
CXCR2
ADRB3
EGLN1
ABCG2
MMP12
MMP14
PTGDR
SLK
PIK3R4
PTGER1
NFE2L2
TRPV4
IFNL3
LEP
PSMB1
HDAC1
PGR
TFF2
UBA3
FFAR2
BRCA1
APRT
BMPR2
CNR2
BDKRB2
CBLC
SMARCB1
TP53
TUBA1B
GC
ADCY5
CDC7
CHRNA3
HTR2C
CCR8
MAPK14
HTR3A
LPAR1
RUNX1
HPRT1
RB1
CRHR1
SPR
CHRNA1
KCNA10
KCNH4
UGT1A10
CA7
E2F1
FAAH
ESR2
RORB
ADA
CALCB
PAK2
P2RY10
CGB5
PDE6B
LAMC2
HTR4
G6PD
HSPB1
LTC4S
CD86
CACNG1
RAMP3
BMP10
FKBP1A
HCAR1
CHRNA5
IFNAR1
NDUFA2
IKBKB
TOP2B
CALCR
CCL4
HCN1
KCNJ1
SCN2A
PIK3R5
NCOA1
TNFRSF1B
CEACAM5
ITGAX
FGFR3
AGTR2
IRAK4
TNFSF13B
MYLK
IRS1
CACNB3
MMP8
SLC18A2
TFPI2
GLP1R
AURKC
GRIK2
HDAC6
HSPA4
PLK1
MAPK8
SCN8A
HMGCR
SERPINA6
APC
PSMB8
CDK6
TNFRSF17
ASIC3
ETV6
MET
ROS1
CYP11B1
GRIN2B
CD22
ITGB3
PPARD
RPTOR
BCHE
ADRA2C
NMUR2
PSEN2
TUBA4A
MVK
ANXA3
NFKB2
STK3
ANXA2P3
FCGR3B
CXCR4
PTPRB
COL18A1
CTAG1B
GPR19
HDAC2
CDK5
CCL3
TGFB1
NR2E3
GHRL
ARVD3
ABCC6
MAP2K5
BRCA2
TRHR
OXTR
NOTCH4
ALB
PAK1
ANXA5
GRIK4
NRG1
AMH
GLRA3
MAP2K3
XPNPEP2
NPY
AVPR1B
MYC
S1PR1
TUBB6
RBP3
AFP
ANPEP
TRPA1
NR2C2
LGR5
PRKCA
CFD
HOXB1
PIP
NF1
DNMT1
RRM1
GCLC
MC1R
PI3
CXCL10
COL5A1
FURIN
ADAM17
SIRT1
KCNN4
NDUFB8
HTR1E
RYR1
CHRM5
TNFRSF4
SLC22A8
COL11A1
P2RY14
PI4KB
EPHA8
CXCL8
IL1R1
TNFRSF10B
PML
CHRNE
KCNK10
FXYD2
CA9
SNAP25
KCNQ2
CYP1A2
TRPC1
GRIK1
BCAR3
FDPS
TUBB2A
CASP3
CGB3
IL6
HRH2
ESR1
TOP1
BLVRB
HLA-B
CSNK1G3
NR5A1
HTR5A
GUCY1A2
TACR2
PTK2B
PYGM
PDE3A
IMPA1
HEXB
ABCC1
ASGR1
NTSR2
EDN1
KCNS3
CR2
CATSPER3
RBP4
CCR1
MT1G
TUBA3D
PSMC5
S1PR4
MADCAM1
TRPM4
NMUR1
GRM2
NDUFB5
CUL4A
CHEK2
CASP1
CEACAM1
PHKG1
CYP2C19
LTA4H
NEK7
CYP2D6
TRH
MC4R
GLRA1
CPN1
PRKCD
KCNA6
NTF3
SPHK1
PHKG2
APOB
TACR3
PTP4A3
DDC
NPPC
CSF3
CDH5
P2RY4
TG
KCNC4
GRIA3
GPBAR1
ITGA3
TLR4
ITGAL
CACNA1B
MUC16
PDE5A
CALCRL
DES
PLK4
PLA2G1B
AKT2
KCNA7
SLC1A2
PTGDS
IL5
SLC5A2
KDM5C
ACTC1
STAT2
MCHR2
FGR
KCNMA1
TAT
MLNR
RPS6KA3
NPFFR1
TDO2
MIF
BCL2L1
VWF
CACNG2
FGB
MYO9B
CXCL2
KAT2B
XDH
MAP2K7
ATR
TPBG
ADAM33
GALR1
PTCH1
RNASEH2A
PDE11A
PRKD3
KRT19
CACNA1D
CGA
GHSR
NDUFC2
LTA
IL23A
PSMD13
PDE7A
KDM1A
GRPR
P2RY13
CYP1B1
PIK3C2A
TH
MST1R
FNTB
ITGB5
ADH1A
FAS
CASP8
CTSK
CYP26B1
NPY1R
XIAP
KDM5B
VIM
MMP13
F8
MAPK13
HSPA8
RPS6KA1
SFTPB
ALOX5
MR1
GCG
WT1
SPINT1
CYP3A4
RARG
PRKDC
PCSK7
CD83
CCL21
CHAT
SLC15A3
RELA
PSMC6
WDR5
CACNA2D3
EPCAM
ITGAM
SERPINB2
SIK1
PRKAA1
COL1A2
PTH2R
CD40
FGA
HMGB1
MDH2
PLCG2
BAZ2B
GLP2R
SIK3
GSR
EP300
MC3R
COMT
ACVRL1
TPH1
CCR7
IL11
FANCC
SGK1
GABBR2
TXNRD1
UMOD
IL18
GCLM
THRA
PGD
GJB4
ACVR1B
PDCD1
MUC5AC
CASP10
ADGRG3
KCNT1
EREG
SLC19A3
CDK4
SV2A
MAP3K9
ROCK2
PTGFR
LPAR3
NFKB1
TLR3
DCPS
NPR2
SLCO1B1
HTR1F
NRAS
MYD88
ORAI1
NT5E
PRKG2
GATA2
DBH
NCOA3
S1PR3
KCNA4
SMAD4
TUBB
HTR3C
GUCY1B3
DGAT2
IL15
HSP90AA1
GRK3
NCAM1
LRRK2
TRIM24
NR1H4
CTGF
NTRK2
PSMD11
AQP9
TNFRSF10A
CD28
IGHE
TLR9
TRPV2
ABCC8
CD38
FER
LPAR2
HYAL2
GPR84
ITGA5
ACTG1P4
CYP7B1
NMBR
ITGA2B
CIP2A
TUBB4B
MMP3
SCN7A
ALMS1
APH1B
GHR
IGFBP6
SCTR
ENUR1
KCNB1
SIK2
PDGFB
SPP1
ADM
CACNA1S
PSMD4P1
AQP10
VKORC1
EHMT2
AKR1B1
TOP1MT
IL4R
WRN
CLCN6
PRKAB1
SF3B1
PTGES
ITGA11
SLC12A2
XPO1
PSMB3
MAPK10
FOS
CMA1
TYR
ATP7B
AMY2A
ATF2
BLK
RAD50
PHEX
NDUFS8
AOX1
FNTA
PSENEN
CBX4
PREP
DPEP1
MSH2
ALDH1A2
EIF2AK3
PDE6A
UGT1A7
GPR143
FST
CHRND
SLCO1A2
ADGRB1
RYR3
CBL
PRKCQ
NAMPT
PGGT1B
IFNA1
COL4A5
TLR8
DPYSL3
HSP90AA2P
FZD6
PRKAR2B
F2RL1
NALCN
TAP2
RARB
TGFBR1
GATA1
CCL1
SLC22A12
IVL
KCNT2
NR1H2
AGT
IL17RA
IPO8
HSP90AB1
GLRB
RYR2
MSTN
GSK3B
NDUFS2
CACNG7
ATP1A3
TFAP2A
ALDH3A1
HDAC10
FGFR4
PSMA8
FGF4
KCNJ10
BRS3
CLCNKB
SLC29A1
CPB2
ACAT1
IGFBP1
GJC2
TBK1
PTPN11
TGFBR2
CACNG3
PTGIR
MYCN
SLC5A7
IL13RA1
STK31
JMJD6
MSH3
SLC22A1
RPS6KA2
APP
PDE9A
ADH4
CACNA2D2
CXCR3
CRTC1
GPR3
ESRRB
LTF
PZP
PAEP
PLIN3
NPY5R
CD8B
WEE1
TTK
LSS
NAPEPLD
NGFR
MARCKSL1
EZH2
SLC6A19
ESRRA
DCLK1
P2RY2
GLS
C3AR1
GRIK3
COIL
KCNN1
CD2
IL12A
STAT5B
NT5C2
CYP4B1
RBX1
SCNN1A
PSMD4
ACPP
HAS3
ROCK1
PDGFC
NDUFAF3
PTMA
PPAT
ACADSB
HPN
GRB2
FCER1G
PRF1
SLC10A2
EPHA3
BIRC2
KCNA5
CASP4
CTSC
CACNA2D1
GSTT1
TBXAS1
PSMD3
NTRK3
NR1H3
CYP26C1
PSMC1
PTK2
POLD1
SCN1B
PARP1
TNNC2
TMSB10
GRM5
SRI
MAZ
REN
ENPP2
THRB
CENPE
CYR61
ATP2A2
CAMK2D
STAT4
PSMD6
GPR55
GP1BA
GSTM1
ADCY6
KCNN2
GUCY1A3
AIFM1
TLE3
MMP7
CREBBP
GJA4
MAP2K4
GABPA
CCL8
HP
KCNH7
DIABLO
EML4
MYH7
NDUFB4
PTPRC
MME
ERCC2
POLA1
CXCR6
PARP3
APOA2
GPR183
SLC5A1
SCNN1B
KCNG2
FCGR2B
PRKD1
ITPKA
CYP17A1
SLC6A1
DYRK4
THPO
MYOD1
CDH1
LIPF
PCSK9
FGG
STMN1
LDLR
REG1A
B2M
PSMC3IP
MAPK3
PSMB10
RXRB
MLANA
KMT5B
PRLHR
PRMT5
PGC
TGFB2
DNMT3A
SLC9A3
RIPK1
CASP7
JUN
ELANE
PSMA6
ACTB
CD19
CACNG6
PIP5K1A
GNRHR2
CCR9
VEGFB
NDUFS1
CFB
HBB
MAPKAPK3
CA4
KCNK3
PRKAB2
FDFT1
TSC1
KCNA2
CNGA1
CD44
CALCA
ALPL
RPE65
CTSH
PRKD2
SLC38A1
P2RY1
IMPDH2
FN1
ERG
PAK4
F2RL3
SYK
ILK
CAPN2
PRTN3
MLST8
CACNA1G
S100A2
ACVR2B
KRT18
CD4
NR4A1
SLC16A1
EIF2AK2
CDK19
CATSPER2
NR1D1
CDK18
CYP51A1
EPHB1
CYP3A7
BCL2L2
NDUFA9
MMP17
ITGA2
IL4
GUCY2C
FASN
KMT5C
F12
COL1A1
NCL
KCNS2
CAMK4
SLC44A1
CCL7
AKR1C3
TRPC4
TTR
MT1IP
CTSG
NDUFAF4
CD58
NUCB1
UGCG
MT-ND5
PLA2G2A
LDHA
PLD2
HNF1A
NR0B2
SLC5A4
MAP2K6
LIF
CHRNB1
GRM8
MBP
CDKN1B
ADH1B
CAMKK2
GJB2
PDE10A
HTR3E
PHB2
CD14
SST
NOS3
FCER2
NDUFS4
PNLIP
BTF3P11
TNFSF11
CCNE1
DIO1
ITGB7
NDUFAB1
GPR39
QPCT
CCNG1
KCNF1
MGA
C1R
VKORC1L1
HTR7
NDUFB1
PLAT
MAPKAPK2
HMOX1
HVCN1
KLK14
NDUFA5
CD33
ITGA4
NOTCH1
BCR
TXNRD3
PARP2
GART
ABCC4
GSK3A
CD40LG
BHMT
IPO7
SOAT1
EEF2
ATP5D
EIF4E
ADAM9
SLCO1B3
PSMA5
KMT2D
GALK2
GJE1
HSD3B1
MAPK12
NTF4
MC5R
CCL18
AKR1C1
NEK3
CAMK2G
ADAM8
TET2
PLD1
NDUFA7
CTSF
MRGPRX1
SEM1
KCNH8
NPBWR1
SLC47A1
EPRS
PSMD8
NECTIN4
NDUFA13
HSPB2
TPP2
LYN
RPS6KA6
TRPC3
PGP
ALDH2
HTT
MYB
CDK15
CLIP2
COL28A1
IBSP
PTPN6
ADH1C
SLCO1C1
IDE
IDH2
ADAM10
BUB1
PCSK1
NPC1L1
CYP24A1
ATAD2
CD47
CACNA2D4
ABCC10
CACNB1
PTPN1
TLR5
LTB4R2
MDM2
TNNC1
TERT
NOD1
CECR2
PMS2
TBP
CTSZ
IL27
IL2RB
XRCC5
CXCR1
CNTFR
GNA11
SLC1A7
IL1R2
BHLHE40
IL17RC
CYP2A6
ADCYAP1
CYP26A1
TESK2
NOTCH2
PSMB5
SFTPA1
AKR1B1P4
SENP8
CD52
CCND3
PLA2G7
TICAM1
MMP1
STAT3
SRD5A3
LPAR5
KCNH6
TPM3
XRCC1
PSME2
FOXJ1
MGLL
CPT1A
ACKR3
STK24
DYRK1A
CACNA1E
SGK2
THBS1
H2AFX
FABP3
BACE1
KLK7
C8G
PSMD7
TACSTD2
FABP5
THBD
BMPR1A
TPSD1
MCL1
ENO2
ECE1
ITPR1
KRT10
MGAM
TRPM5
APCS
INHBA
IL17F
CSH1
CD3E
GJA8
PPIA
NR1I3
SERPINA5
HIST3H2A
BRD1
NDUFS5
PSMC1P1
SLC15A2
CALM1
NDUFB3
TYMP
DFFB
EPHA4
SMAD3
ADARB2
HNMT
CACNB2
CACNA1A
RPS6KB2
SLC19A1
NR1D2
VAMP2
RNPEP
ST14
ALOX15
JUND
MTAP
SMOX
HDC
POLE
KCNJ13
CLCN1
KCNV2
VAV1
ICAM3
CTSD
BRPF1
KDM6B
STS
PKD2L1
DSG3
S100A10
ART1
ADI1
HCN2
RXFP1
ATP4B
MAP2
SLC22A6
CD34
BRD7
PSMD1
GADD45G
C1QA
CLU
PSMA3
PXN
PLTP
HLA-DQA1
TRPC7
GPR139
CTSE
RRM2B
ESRRG
KCNG1
CES1
ITK
WNT7A
NDUFB10
METAP2
KIF11
NDUFS7
CTSS
ACVR1C
EPHB4
NDUFA8
PANX1
HCN4
MMP11
C1QB
SLC28A2
PAK5
MFGE8
PSMD10P2
PBRM1
GZMA
MAP3K10
CLK2
PSMD9
ACVR1
OGG1
PLA2G6
CDH2
PAX2
HTRA1
EPHA7
ALDH5A1
BCOR
LAMB2
UOX
REG3A
TERC
RUNX2
SCG5
JUNB
CTAG2
CEL
CSNK1D
MAPK15
NDUFA10
NDUFA12
PAPPA
TMEM173
TMPRSS11D
GAA
HSD3B2
KRT17
TK2
MAP3K13
TEP1
CSNK1G1
PSMB9
ARID1A
CDS1
DLX3
PDE1B
UCP2
MST1
PMAIP1
INSRR
DAPK3
PSME3
KCNG3
MMP25
FPR3
CETP
ABCC2
GPT
CD276
PSMD10P3
EGR2
KEAP1
HMOX2
KCNQ5
CD55
GPR35
MIA
IGF1
IL3RA
SLC25A5
SDC2
KCNK18
MAP3K6
PI4K2A
HOXD1
HLA-DRB5
ERAP1
IGF2
NGF
MT-ND4L
WNK3
EPHB3
KCNJ2
NFE2
PRMT1
UTS2R
MT1H
IMPDH1
PPP3R2
GJA1
PSMD12
NPY4R
PSMB7
CFLAR
GPRC6A
NDUFAF1
SLC38A5
TRPM6
SAG
GALP
CHRNB4
COL2A1
CYP4F2
TSSK2
PMP22
PRKCZ
CDK17
MT1F
GDNF
ADK
SRD5A1
IL13RA2
NDUFV2
NPPA
PRKCI
PROZ
ALPP
GFRA1
SLC6A14
PRSS1
HPD
GYPA
PSMB11
UGT1A9
PIPSL
UBR1
PDE6C
CDC25C
CAMLG
CA5A
FCGR1A
EGLN3
PSMC3
ACACA
TNFRSF11B
PBK
MLH1
BAP1
C5
CSRP2
FBP1
TNK2
ANGPT1
EIF5A
QPRT
SPTLC2
CD5
AQP1
IPO13
SELE
PDYN
S100A12
ACTL6A
ABCB11
KIR2DL3
KMT5A
KCNC3
GPR18
IFNGR2
HSD11B1
DYRK1B
CDA
APH1A
GPI
CALR
CYP20A1
MAGEA3
CCND2
NCSTN
PSME2P2
E2F2
LIPE
MAPK7
SQLE
TPH2
CDK10
CCL28
CD59
TPP1
PDK3
FGF3
VEGFC
MAS1
HEBP1
TAGLN
UGT1A5
PGA3
GJB6
SIRT2
CXCR5
TSC22D3
MBL2
NPBWR2
PRSS8
CTSL
MT-ND3
TPSAB1
CMKLR1
MARK2
DCLK3
ATP1B2
NF2
KDM4A
IPO4
PSMA7
GDF15
KCNH5
ACP5
COL15A1
GPR37
USP14
HCN3
NPR3
CCR6
FGF1
RORA
EPO
PDE8B
PCSK2
KCNQ3
RORC
ETV4
MSLN
F5
CEBPA
S100A8
TNFRSF1A
NDUFA3
SLC3A2
S1PR5
RUNX3
PDE1C
THY1
LPO
HPGDS
ACVR2A
CARM1
CYP2B6
SHH
CLCNKA
KCNH1
GAL
DLL4
LOXL2
TNIK
CSNK2A2
PSMA1
VDAC3
LGR4
P2RY8
CACNA1H
ATP2C1
IKBKE
IL13
SLC22A5
PYGL
SLC5A8
CYP2C9
POLG
BAZ2A
HLA-DRB2
TNFRSF13C
STK10
AOC3
AQP6
CATSPER4
NEUROD1
CASP14
SDHB
S100B
IL7
PRSS3
MAP3K11
PPID
PDK2
IL22
IL17RB
DPYD
DBP
CD27
IRS2
LAMA5
EPHA5
CD7
CD69
ENTPD1
IRF2
IL11RA
SYP
BRDT
SERPINA1
GPR52
CGF1
METAP1
RAPGEF3
CYP11B2
HCRTR2
MPI
FOXP3
SMN1
NTS
ADRM1
SHBG
PSMB6
SETD2
GLYB
CASP2
COL4A4
ELAVL1
MIR125B2
GAPDH
MCOLN1
F2RL2
PROC
SLC27A1
DNAJB1
TEC
SRD5A2
MT-ND6
SCNN1D
CRH
CD248
KCND3
BLM
IFIT2
ABCA1
TCIM
OPLAH
CATSPER1
INPP5D
SUV39H1
MAPKAP1
THRSP
RIT1
KCNH3
CLCN7
SLC19A2
CSF2RB
DCLK2
LPAR4
IL1RN
SLC10A1
LIMK2
CYP2C8
CLCN3
GPR87
AOAH
PER1
MAP3K5
SUCNR1
PCNA
SLAMF7
FOXM1
MAP4K5
XCR1
TESK1
CDK11B
PKN1
KCND1
IFNGR1
RNPEPL1
ACKR4
BRD2
CCL11
SLC52A2
CR1
PGF
NDUFA4L2
STAG2
GDF2
PIGF
HOXA9
TJP1
PRKAA2
HCAR3
PSMC4
PDHX
TIE1
FANCA
TAC3
UGDH
DLG4
[truncated: 993 more rows]

## Sheet: Oncogene
ABL1
ACVR1
AKT1
AKT2
ALK
AR
ARAF
RHOA
AXL
CCND1
BCL2
BCL6
BRAF
BTK
CCND2
CCND3
CCNE1
CDK4
CDK6
CRKL
CTLA4
CTNNB1
E2F3
EGFR
ERBB2
ERBB3
ERBB4
ERG
ESR1
ETV1
ETV6
EWSR1
EZH2
FGF3
FGF4
FGFR1
FGFR3
FGFR2
FGFR4
FLT1
FLT3
FLT4
MTOR
GATA3
GLI1
GNA11
GNAQ
GNAS
HGF
FOXA1
HRAS
IDH1
IDH2
IGF1
IGF1R
IGF2
JAK2
JUN
KDR
KIT
KRAS
MDM2
MDM4
MET
MITF
MYC
MYCN
MYD88
NFE2L2
NFKBIA
NOTCH1
NOTCH2
NRAS
NTRK1
NTRK2
NTRK3
DDR2
PDGFRA
PDGFRB
PIK3C3
PIK3CA
PIK3CB
PIK3CD
PIK3CG
PPP6C
PRKCI
MAPK1
MAP2K1
PTPN11
RAC1
RAD51
RAF1
RET
RHEB
RIT1
ROS1
SMO
SRC
STAT3
AURKA
TERT
TMPRSS2
U2AF1
PAX8
PPM1D
IRS2
AURKB
FGF19
MED12
AKT3
YAP1
RRAS2
SF3B1
BRD4
FOXP1
RPTOR
NSD1
RICTOR
MEF2B
