# Supplementary material for: Conserved Control Path in Multilayer Networks
Source: Entropy (Basel). 2022 Jul 15;24(7):979. doi: 10.3390/e24070979 (PMC9324794; doi:10.3390/e24070979)
Supplement: Supplementary file 1 [file entropy-24-00979-s001.zip › Supplementary Data 4.xlsx]

## Sheet: BLCA
	CGC cancer	GWAS disease	OMIM disease	virus host	promoter	essential	kinase	drug target	Oncogene
isolated	2.21372e-05	0.0294499	3.89294e-12	0.000937997	3.73126e-11	0.0153351	2.23417e-06	8.47692e-13	2.45268e-07
path	4.30553	1.20586	19.39	2.8749	10.6234	1.8404	5.43554	16.2604	5.5012
cycle	0.550903	0.379721	0.398402	0.298493	0.136043	0.0504918	0.648749	4.20503	1.63667
	CGC cancer	GWAS disease	OMIM disease	virus host	promoter	essential	kinase	drug target	Oncogene
source	8.6672e-08	0.0131988	2.88435e-12	4.25287	0.0201173	0.0120054	0.0156753	0.000281547	7.48173e-05
intermediate	9.56634	4.14969	14.8049	0.380061	2.58862	3.05925	8.06609	15.0428	11.001
sink	0.0543589	0.0183819	0.166834	1.19394e-05	0.083194	0.0742028	2.58034e-05	1.01666e-06	0.000216125

## Sheet: BRCA
	CGC cancer	GWAS disease	OMIM disease	virus host	promoter	essential	kinase	drug target	Oncogene
isolated	3.49253e-05	0.0058324	1.757e-13	1.06126e-05	3.69188e-12	0.0454739	1.65951e-06	1.91028e-12	1.32756e-08
path	5.09064	2.21793	20.7385	4.79074	10.8754	1.42885	6.09138	21.9984	8.8852
cycle	0.0183102	0.0818578	0.969398	0.349001	0.549689	0.0177673	0.245178	1.50908	0.154494
	CGC cancer	GWAS disease	OMIM disease	virus host	promoter	essential	kinase	drug target	Oncogene
source	1.20845e-10	0.0145996	1.37696e-12	2.48611	0.0306989	0.0601906	0.00205905	3.84828e-05	2.99949e-09
intermediate	13.0576	3.93755	16.8304	0.44516	1.93193	2.78627	9.81613	14.6058	15.0859
sink	0.0266656	0.0171054	0.0476348	0.000628425	0.122592	0.0193913	1.83292e-05	7.78403e-06	0.000577191

## Sheet: COAD
	CGC cancer	GWAS disease	OMIM disease	virus host	promoter	essential	kinase	drug target	Oncogene
isolated	5.75962e-05	0.00157525	0	5.76592e-05	9.66415e-12	0.00216299	2.06892e-06	1.55295e-12	1.79926e-07
path	4.43221	2.20402	16.6682	4.06434	9.91031	2.42629	6.00398	18.948	6.95188
cycle	0.128197	0.804788	0.588768	0.333189	0.935096	0.253897	0.241387	2.61123	0.471554
	CGC cancer	GWAS disease	OMIM disease	virus host	promoter	essential	kinase	drug target	Oncogene
source	3.15522e-10	0.00906307	0	4.36679	0.0611588	0.126465	0.00271391	6.26973e-07	1.07947e-08
intermediate	11.0847	4.28182	14.2201	0.349389	2.09764	2.45385	11.0616	22.2115	15.4484
sink	0.07478	0.0176069	0.230376	1.16054e-05	0.0537051	0.0121209	1.18703e-06	3.77532e-08	0.000208046

## Sheet: ESCA
	CGC cancer	GWAS disease	OMIM disease	virus host	promoter	essential	kinase	drug target	Oncogene
isolated	5.01156e-05	0.0729236	0	0.0210018	2.44402e-06	0.0665601	3.06757e-05	0	1.35899e-05
path	3.96865	0.785342	11.6154	1.49955	5.73311	1.41243	3.22868	12.7226	5.60476
cycle	0.528268	0.501567	0.652688	0.282174	0.119678	0.00448672	2.11797	3.24725	0.149301
	CGC cancer	GWAS disease	OMIM disease	virus host	promoter	essential	kinase	drug target	Oncogene
source	2.62993e-06	0.000841565	3.3795e-10	2.50409	0.245211	0.333739	0.135855	0.00436968	0.000119486
intermediate	8.48839	3.56782	8.51947	0.593877	0.95629	1.21313	2.97912	6.97794	9.87414
sink	0.0680068	0.254145	0.862135	0.000293706	0.10066	0.0387683	0.0103213	0.00436968	0.00194628

## Sheet: HNSC
	CGC cancer	GWAS disease	OMIM disease	virus host	promoter	essential	kinase	drug target	Oncogene
isolated	2.01874e-05	0.00189416	1.93594e-12	3.05274e-06	3.25931e-10	0.0126444	6.45845e-08	3.21618e-12	1.46436e-07
path	4.84015	1.76214	19.1756	5.75909	9.52029	1.88761	7.17713	18.4615	7.13259
cycle	0.165134	1.80646	0.136901	0.124698	0.171279	0.0759476	0.444584	3.20211	0.395241
	CGC cancer	GWAS disease	OMIM disease	virus host	promoter	essential	kinase	drug target	Oncogene
source	2.99998e-09	0.0165241	6.56466e-12	3.2145	0.0766184	0.0509078	0.00195401	0.000298301	3.29033e-08
intermediate	10.7199	3.40108	14.7133	0.470286	2.77039	2.33723	9.63332	14.3396	13.177
sink	0.0631374	0.0350358	0.114366	7.6874e-05	0.0159089	0.0509078	4.22057e-05	1.83502e-06	0.00193355

## Sheet: KICH
	CGC cancer	GWAS disease	OMIM disease	virus host	promoter	essential	kinase	drug target	Oncogene
isolated	9.66702e-06	6.71612e-05	1.27846e-12	6.07021e-06	9.49209e-10	0.00418767	1.61972e-05	1.67248e-12	2.39511e-08
path	5.52314	3.44614	19.6306	5.30152	10.1955	2.33623	5.49542	15.4697	8.67981
cycle	0.0539807	0.854706	0.258126	0.184596	0.00727048	0.105644	0.0633754	3.26949	0.14834
	CGC cancer	GWAS disease	OMIM disease	virus host	promoter	essential	kinase	drug target	Oncogene
source	3.2181e-08	0.00935225	0	2.84306	0.028847	0.240399	0.00148449	5.94297e-06	6.48091e-08
intermediate	9.59851	2.96404	14.1393	0.273265	1.82568	1.08242	8.34623	16.4276	14.6363
sink	0.05568	0.0825372	0.237815	0.00114737	0.149261	0.0644893	0.000346142	5.94297e-06	0.000203022

## Sheet: KIRC
	CGC cancer	GWAS disease	OMIM disease	virus host	promoter	essential	kinase	drug target	Oncogene
isolated	3.58073e-05	0.00062907	5.1483e-12	9.74277e-06	7.18877e-12	0.00266081	2.07576e-06	1.95677e-12	6.09035e-09
path	4.90121	2.64645	18.989	5.36362	11.3898	2.74355	6.17529	18.2986	9.42741
cycle	0.0574685	0.618839	0.138969	0.0833274	0.150816	0.0455351	0.15427	2.20375	0.103728
	CGC cancer	GWAS disease	OMIM disease	virus host	promoter	essential	kinase	drug target	Oncogene
source	3.2857e-09	0.0374676	9.33855e-13	3.13258	0.0479911	0.22118	0.00126765	2.66037e-06	9.88018e-08
intermediate	10.1417	3.94408	17.0074	0.173285	1.65154	1.22238	11.1414	17.7449	13.4894
sink	0.0683133	0.00547915	0.0889239	0.00186877	0.125967	0.0524461	3.06089e-06	1.86182e-06	0.00053617

## Sheet: KIRP
	CGC cancer	GWAS disease	OMIM disease	virus host	promoter	essential	kinase	drug target	Oncogene
isolated	3.88998e-06	0.00138408	4.45568e-13	1.14623e-05	1.64551e-09	0.00584035	4.23391e-06	2.7277e-12	5.90177e-09
path	5.90548	2.00814	17.1597	4.96375	8.97855	2.52399	6.11604	17.5097	9.33718
cycle	0.0613028	1.48166	0.0579626	0.210618	0.117063	0.0131687	0.0686063	1.14596	0.162875
	CGC cancer	GWAS disease	OMIM disease	virus host	promoter	essential	kinase	drug target	Oncogene
source	3.98592e-10	0.0229486	1.42238e-12	3.79761	0.0335893	0.164892	0.00506025	1.57409e-05	5.40375e-06
intermediate	10.5424	2.98884	16.992	0.24537	1.9218	0.796206	9.95542	18.0346	14.0474
sink	0.101465	0.0407339	0.0976222	0.000169385	0.119333	0.182268	3.69772e-06	2.95103e-07	1.93353e-05

## Sheet: LIHC
	CGC cancer	GWAS disease	OMIM disease	virus host	promoter	essential	kinase	drug target	Oncogene
isolated	7.11529e-06	0.000585489	7.16736e-13	1.46028e-06	2.07097e-10	0.011038	1.85626e-06	0	6.94436e-09
path	5.83322	2.73726	15.2554	6.39254	10.165	2.25057	6.15747	22.6608	9.38347
cycle	0.0312762	0.535349	0.154692	0.0522496	0.0692911	0.0128476	0.201346	0.854108	0.125105
	CGC cancer	GWAS disease	OMIM disease	virus host	promoter	essential	kinase	drug target	Oncogene
source	9.62496e-09	0.00641304	2.00349e-12	3.43791	0.0674215	0.13849	0.0076391	7.28154e-05	5.46245e-06
intermediate	10.4545	4.9637	16.0295	0.0921456	1.89721	1.72244	8.75728	17.2679	13.2174
sink	0.0466206	0.0109486	0.471927	0.00358034	0.0674215	0.039992	1.69284e-05	1.19508e-07	6.2684e-05

## Sheet: LUAD
	CGC cancer	GWAS disease	OMIM disease	virus host	promoter	essential	kinase	drug target	Oncogene
isolated	9.514e-06	0.000512894	5.4957e-12	9.76312e-06	5.06609e-12	0.00989014	4.2317e-08	1.77523e-12	4.19484e-08
path	4.95344	2.51922	17.1865	5.03931	12.1273	2.18289	6.44045	18.119	7.0222
cycle	0.287145	1.04568	0.54764	0.205001	0.320352	0.0255278	1.15962	3.97899	0.793144
	CGC cancer	GWAS disease	OMIM disease	virus host	promoter	essential	kinase	drug target	Oncogene
source	5.43255e-09	0.0234136	4.68808e-13	2.20249	0.0329781	0.131317	0.00185982	1.8309e-06	2.47836e-07
intermediate	12.6652	5.25286	15.4554	0.379115	2.19534	2.18709	8.97333	16.9307	14.1788
sink	0.0105728	0.00157468	0.190093	0.00215824	0.0827016	0.0184273	9.67045e-05	1.02225e-05	0.000157818

[truncated: 6 more sheets: LUSC, PRAD, READ, STAD, THCA, UCEC]
