# Supplementary material for: Conserved Control Path in Multilayer Networks
Source: Entropy (Basel). 2022 Jul 15;24(7):979. doi: 10.3390/e24070979 (PMC9324794; doi:10.3390/e24070979)
Supplement: Supplementary file 1 [file entropy-24-00979-s001.zip › Supplementary Data 5.xlsx]

## Sheet: Sheet1
cancer name	predicted drug name	category	Literature_name	PMID
BRCA	Regorafenib	unclear
COAD	Regorafenib	FDA-approved
LIHC	Regorafenib	literature-implied	A systematic analysis of FDA-approved anticancer drugs	28984210
LUAD	Regorafenib	unclear
STAD	Regorafenib	literature-implied	A systematic analysis of FDA-approved anticancer drugs	28984210	Pellino A, Riello E, Nappo F, et al. Targeted therapies in metastatic gastric cancer: Current knowledge and future perspectives. World J Gastroenterol. 2019;25(38):5773–5788. doi:10.3748/wjg.v25.i38.5773	31636471
BRCA	Fluorouracil	FDA-approved
COAD	Fluorouracil	FDA-approved
LIHC	Fluorouracil	unclear
LUAD	Fluorouracil	unclear
STAD	Fluorouracil	FDA-approved
BRCA	Sorafenib	literature-implied	Sorafenib for the treatment of breast cancer	28335647
COAD	Sorafenib	literature-implied	Exploring the efficacy and cellular uptake of sorafenib in colon cancer cells by Raman micro-spectroscopy	30426981
LIHC	Sorafenib	FDA-approved
STAD	Sorafenib	unclear
LUAD	Sorafenib	literature-implied	Comprehensive biomarker analysis and final efficacy results of sorafenib in the BATTLE trial	24166906
BRCA	Trastuzumab emtansine	FDA-approved
COAD	Trastuzumab emtansine	unclear
LUAD	Trastuzumab emtansine	literature-implied	Trastuzumab Emtansine (T-DM1) in Patients with Previously Treated HER2-Overexpressing Metastatic Non-Small Cell Lung Cancer: Efficacy, Safety and Biomarkers	30206164
BRCA	Pertuzumab	FDA-approved
COAD	Pertuzumab	unclear
LUAD	Pertuzumab	literature-implied	A systematic analysis of FDA-approved anticancer drugs	28984210
BRCA	Ramucirumab	unclear
COAD	Ramucirumab	literature-implied	Comprehensive review of targeted therapy for colorectal cancer	32296018
LIHC	Ramucirumab	literature-implied	A systematic analysis of FDA-approved anticancer drugs	28984210
LUAD	Ramucirumab	FDA-approved
STAD	Ramucirumab	literature-implied	A systematic analysis of FDA-approved anticancer drugs	28984210	Fuchs CS, Tomasek J, Yong CJ, Dumitru F, Passalacqua R, Goswami C, Safran H, Dos Santos LV, Aprile G, Ferry DR, et al. Ramucirumab monotherapy for previously treated advanced gastric or gastro-oesophageal junction adenocarcinoma (REGARD): an international, randomised, multicentre, placebo-controlled, phase 3 trial.	24094768
COAD	Porfimer	unclear
LUAD	Porfimer	FDA-approved
BRCA	Fluoxymesterone	FDA-approved
COAD	Fluoxymesterone	unclear
LUAD	Fluoxymesterone	unclear
STAD	Fluoxymesterone	unclear
LUAD	Nintedanib	FDA-approved
BRCA	Nintedanib	literature-implied	Emerging therapeutic targets in metastatic progression: A focus on breast cancer	27000769
COAD	Nintedanib	literature-implied	Nintedanib for the treatment of patients with refractory metastatic colorectal cancer (LUME-Colon 1): a phase III, international, randomized, placebo-controlled study	30010751
LIHC	Nintedanib	unclear
STAD	Nintedanib	unclear
BRCA	Vinblastine	FDA-approved
LUAD	Vinblastine	literature-implied	Lung cancer: Biology and treatment options. Biochim Biophys Acta	26297204
BRCA	Pemetrexed	unclear
COAD	Pemetrexed	unclear
LIHC	Pemetrexed	unclear
LUAD	Pemetrexed	FDA-approved
STAD	Pemetrexed	literature-implied	Pemetrexed for previously treated patients with metastatic gastric cancer: a prospective phase II study	25474247
BRCA	Aflibercept	literature-implied	Cell-specific biomarkers and targeted biopharmaceuticals for breast cancer treatment	27312135
COAD	Aflibercept	FDA-approved
LIHC	Aflibercept	unclear
LUAD	Aflibercept	literature-implied	Lung cancer: Biology and treatment options	26297204
BRCA	Trastuzumab	FDA-approved
LIHC	Trastuzumab	unclear
STAD	Trastuzumab	FDA-approved
COAD	Trastuzumab	unclear
LUAD	Trastuzumab	literature-implied	A systematic analysis of FDA-approved anticancer drugs	28984210
BRCA	Trifluridine	unclear
COAD	Trifluridine	FDA-approved
LIHC	Trifluridine	unclear
LUAD	Trifluridine	unclear
STAD	Trifluridine	literature-implied	LBA-002 Overall survival results from a phase III trial of trifluridine/tipiracil versus placebo in patients with metastatic gastric cancer refractory to standard therapies (TAGS) Annals of Oncology	32177020	Trifluridine/tipiracil versus placebo in patients with heavily pretreated metastatic gastric cancer (TAGS): a randomised, double-blind, placebo-controlled, phase 3 trial	30355453
BRCA	Everolimus	FDA-approved
COAD	Everolimus	Literature-implied	Comprehensive review of targeted therapy for colorectal cancer	32296018
COAD	Cetuximab	FDA-approved
LIHC	Cetuximab	unclear
LUAD	Cetuximab	literature-implied	A systematic analysis of FDA-approved anticancer drugs	28984210
BRCA	Cetuximab	literature-implied	A systematic analysis of FDA-approved anticancer drugs	28984210
BRCA	Capecitabine	FDA-approved
COAD	Capecitabine	FDA-approved
LIHC	Capecitabine	literature-implied	The role of metronomic capecitabine for treatment of recurrent hepatocellular carcinoma after liver transplantation	28900245
LUAD	Capecitabine	unclear
STAD	Capecitabine	FDA-approved
BRCA	Floxuridine	unclear
COAD	Floxuridine	unclear
LIHC	Floxuridine	FDA-approved
LUAD	Floxuridine	unclear
STAD	Floxuridine	unclear
COAD	Bevacizumab	FDA-approved
LUAD	Bevacizumab	FDA-approved
BRCA	Bevacizumab	literature-implied	Cell-specific biomarkers and targeted biopharmaceuticals for breast cancer treatment	27312135
LIHC	Bevacizumab	unclear
BRCA	Tamoxifen	FDA-approved
LIHC	Tamoxifen	unclear
LUAD	Tamoxifen	unclear
STAD	Tamoxifen	unclear
COAD	Tamoxifen	unclear
LUAD	Afatinib	FDA-approved
BRCA	Afatinib	literature-implied	Afatinib in the treatment of breast cancer	24870559
COAD	Afatinib	literature-implied	Comprehensive review of targeted therapy for colorectal cancer	32296018
BRCA	Palbociclib	FDA-approved
COAD	Palbociclib	unclear
BRCA	Methotrexate	FDA-approved
COAD	Methotrexate	unclear
LIHC	Methotrexate	unclear
LUAD	Methotrexate	FDA-approved
STAD	Methotrexate	unclear
BRCA	Megestrol acetate	FDA-approved
COAD	Megestrol acetate	unclear
LUAD	Megestrol acetate	unclear
STAD	Megestrol acetate	unclear
BRCA	Gemcitabine	FDA-approved
LUAD	Gemcitabine	FDA-approved
